# Supplementary material for: Increased response to TPF chemotherapy promotes immune escape in hypopharyngeal squamous cell carcinoma
Source: Front Pharmacol. 2023 Jan 13;13:1097197. doi: 10.3389/fphar.2022.1097197 (PMC9880322; doi:10.3389/fphar.2022.1097197)
Supplement: Supplementary file 6 [file DataSheet3.XLSX]

## Sheet: Sheet 1
RNAseq number	status	sample	admin.batch_number	admin.bcr	admin.day_of_dcc_upload	admin.disease_code	admin.file_uuid	admin.month_of_dcc_upload	admin.project_code	admin.year_of_dcc_upload	alcohol_history_documented	amount_of_alcohol_consumption_per_day	anatomic_neoplasm_subdivision	bcr_patient_barcode	bcr_patient_uuid	day_of_form_completion	days_to_birth	days_to_death	days_to_initial_pathologic_diagnosis	days_to_last_followup	days_to_last_known_alive	drug.bcr_drug_barcode	drug.bcr_drug_uuid	drug.clinical_trail_drug_classification	drug.day_of_form_completion	drug.days_to_drug_therapy_end	drug.days_to_drug_therapy_start	drug.drug_name	drug.measure_of_response	drug.month_of_form_completion	drug.number_cycles	drug.prescribed_dose	drug.prescribed_dose_units	drug.regimen_indication	drug.regimen_indication_notes	drug.regimen_number	drug.route_of_administrations.route_of_administration	drug.therapy_ongoing	drug.therapy_types.therapy_type	drug.therapy_types.therapy_type_notes	drug.total_dose	drug.total_dose_units	drug.tx_on_clinical_trial	drug.year_of_form_completion	egfr_amplication_status	ethnicity	follow_up.additional_pharmaceutical_therapy	follow_up.additional_radiation_therapy	follow_up.additional_surgery_locoregional_procedure
TCGA-4P-AA8J-01A-11R-A39I-07	Tumor	TCGA-4P-AA8J	403.37.0	Nationwide Children's Hospital	22	HNSC	DD649DE1-A7A7-4949-BEBD-9266EAA490AE	12	TCGA	2016	NO	Not Available	Oral Tongue	TCGA-4P-AA8J	757C56D0-8A49-464F-866A-AE98816DE60B	5	-24222		0	102	Not Available																								Not Evaluated	NOT HISPANIC OR LATINO
TCGA-BA-4074-01A-01R-1436-07	Tumor	TCGA-BA-4074	54.89.0	Nationwide Children's Hospital	22	HNSC	6428EA11-D05D-4AC2-956B-72AAD1B27ABA	12	TCGA	2016	YES	Not Available	Oral Tongue	TCGA-BA-4074	a63ca97d-ef31-4118-9547-a6730967290f	14	-25282	462	0		Not Available	TCGA-BA-4074-D4877	63bcb5e7-c890-4f60-b14d-4a583b8f1ee9	Not Available	10	97	45	Carboplatin	Not Available	12	Not Available	Not Available	Not Available	ADJUVANT	Not Applicable	1	Not Available	NO	Chemotherapy	Not Available	Not Available	Not Available	Not Available	2010	Not Available	NOT HISPANIC OR LATINO	NO	YES	NO
TCGA-BA-4075-01A-01R-1436-07	Tumor	TCGA-BA-4075	54.89.0	Nationwide Children's Hospital	22	HNSC	212BD8B3-18AD-4F05-B6BD-E61C56F44B3C	12	TCGA	2016	YES	5	Oral Tongue	TCGA-BA-4075	6fa62461-e721-415a-8b0f-363b84292b82	4	-17951	283	0		Not Available	TCGA-BA-4075-D9965;TCGA-BA-4075-D9966	c96b1f60-c308-47a3-b27c-ea06cc9e54b4;76c7fe23-2fe8-4181-b3a3-24aeda9d9293	Not Available;Not Available	4;4	292;292	264;264	Carboplatinum;Taxol	Not Available;Not Available	4;4	Not Available;Not Available	2;45	AUC;mg/m2	PALLIATIVE;PALLIATIVE	Not Applicable;Not Applicable	1;1	Not Available;Not Available	NO;NO	Chemotherapy;Chemotherapy	Not Available;Not Available	Not Available;Not Available	Not Available;Not Available	Not Available;Not Available	2011;2011	Not Available	NOT HISPANIC OR LATINO	YES	NO	NO
TCGA-BA-4076-01A-01R-1436-07	Tumor	TCGA-BA-4076	54.89.0	Nationwide Children's Hospital	22	HNSC	E6F6285B-1BBA-43DA-9A7C-CCC27E7E64A6	12	TCGA	2016	YES	Not Available	Larynx	TCGA-BA-4076	7de19081-d5fd-468c-ad0d-f6e3e8b2ad70	10	-14405	415	0		Not Available	TCGA-BA-4076-D6283;TCGA-BA-4076-D6284	ddef241a-10c6-4dfd-bab8-4d8c367b0eac;5da54504-1a43-4257-acb1-87e8686573ed	Not Available;Not Available	10;10	64;64	18;18	Cisplatin;5FU	Not Available;Not Available	12;12	2;2	Not Available;Not Available	Not Available;Not Available	ADJUVANT;ADJUVANT	Not Applicable;Not Applicable	1;1	Not Available;Not Available	NO;NO	Chemotherapy;Chemotherapy	Not Available;Not Available	Not Available;Not Available	Not Available;Not Available	Not Available;Not Available	2010;2010	Not Available	NOT HISPANIC OR LATINO	NO	NO	NO
TCGA-BA-4077-01B-01R-1436-07	Tumor	TCGA-BA-4077	54.89.0	Nationwide Children's Hospital	22	HNSC	18A892E2-7196-4569-BD89-FDDB315AC730	12	TCGA	2016	YES	0	Base of tongue	TCGA-BA-4077	4bfbce2b-9d0b-4e8a-950f-fd8e0ba3e05a	4	-16536	1134	0		Not Available	TCGA-BA-4077-D9957	528cddf3-fef8-40f7-884d-bc28302ffe6a	Not Available	4	1043	912	Cetuximab	Not Available	4	Not Available	Not Available	Not Available	PALLIATIVE	Not Applicable	1	Not Available	NO	Chemotherapy	Not Available	Not Available	Not Available	Not Available	2011	Not Available	NOT HISPANIC OR LATINO	YES	NO	Not Available
TCGA-BA-4078-01A-01R-1436-07	Tumor	TCGA-BA-4078	54.89.0	Nationwide Children's Hospital	22	HNSC	FA736C93-5553-40F1-B510-A9B774969CB1	12	TCGA	2016	NO	Not Available	Larynx	TCGA-BA-4078	c7353d6a-82a2-4a0d-8cd4-8c8957943edb	10	-30480	276	0		Not Available																								Not Available	NOT HISPANIC OR LATINO	Not Available	Not Available	Not Available
TCGA-BA-5151-01A-01R-1436-07	Tumor	TCGA-BA-5151	54.89.0	Nationwide Children's Hospital	22	HNSC	9677D5AF-F4CF-4B8F-86E9-842443F44A72	12	TCGA	2016	YES	0	Buccal Mucosa	TCGA-BA-5151	a55fb87d-f606-48a5-82f5-09eacbacf41b	27	-26569		0	190	Not Available																								Not Available	NOT HISPANIC OR LATINO	Not Available;NO	Not Available;NO	Not Available;Not Available
TCGA-BA-5152-01A-02R-1873-07	Tumor	TCGA-BA-5152	145.84.0	Nationwide Children's Hospital	22	HNSC	4F27DB6B-263D-47A1-A1D8-827F67EB5CC4	12	TCGA	2016	YES	0	Alveolar Ridge	TCGA-BA-5152	01420c4e-6013-4d3f-87bd-a6cd9e3f8e87	8	-20783		0	846	Not Available																								Not Available	NOT HISPANIC OR LATINO	Not Available;Not Available	Not Available;Not Available	Not Available;Not Available
TCGA-BA-5153-01A-01R-1436-07	Tumor	TCGA-BA-5153	54.89.0	Nationwide Children's Hospital	22	HNSC	38F05C51-40B7-4C13-B412-9EF5F2B857D1	12	TCGA	2016	YES	0	Tonsil	TCGA-BA-5153	b3631718-9e0a-454c-bee1-8f36ebc509d8	10	-18743	1762	0		Not Available	TCGA-BA-5153-D6528;TCGA-BA-5153-D6530;TCGA-BA-5153-D6523;TCGA-BA-5153-D6526	b8c8e08b-9c91-472b-8030-f99dded9e6dd;d2751b5a-a528-4326-b18b-dc47784924b3;7f8f93e1-7643-4958-aabb-867bfa5da766;85a4ed84-c597-4f42-b8fe-a961cc5c868c	Not Available;Not Available;Not Available;Not Available	13;13;13;13	Not Available;Not Available;Not Available;Not Available	Not Available;Not Available;Not Available;Not Available	Xeloda;Carboplatin;Zometa;Cisplatin	Not Available;Not Available;Not Available;Not Available	12;12;12;12	Not Available;Not Available;Not Available;Not Available	Not Available;Not Available;Not Available;Not Available	Not Available;Not Available;Not Available;Not Available	PALLIATIVE;PROGRESSION;PALLIATIVE;Not Available	Not Applicable;Not Applicable;Not Applicable;Not Applicable	2;3;2;2	Not Available;Not Available;Not Available;Not Available	NO;NO;NO;NO	Chemotherapy;Chemotherapy;Other, specify in notes;Chemotherapy	Not Available;Not Available;Ancillary Agent;Not Available	Not Available;Not Available;Not Available;Not Available	Not Available;Not Available;Not Available;Not Available	Not Available;Not Available;Not Available;Not Available	2010;2010;2010;2010	Not Available	NOT HISPANIC OR LATINO	NO;YES	NO;YES	NO;NO
TCGA-BA-5555-01A-01R-1514-07	Tumor	TCGA-BA-5555	83.86.0	Nationwide Children's Hospital	22	HNSC	EE89551C-3A2B-4C20-A09C-C0C1F9F2B6C0	12	TCGA	2016	YES	0	Larynx	TCGA-BA-5555	8970f713-4a7a-4125-892c-6a34139371d8	4	-19956		0	186	Not Available																								Not Available	NOT HISPANIC OR LATINO	Not Available;NO	Not Available;NO	Not Available;Not Available
TCGA-BA-5556-01A-01R-1514-07	Tumor	TCGA-BA-5556	83.86.0	Nationwide Children's Hospital	22	HNSC	1AF5B3B9-0DE8-4AB3-8F7D-6FA3DC3C459D	12	TCGA	2016	YES	2	Floor of mouth	TCGA-BA-5556	70741b73-9683-42bd-87fc-6a021a70103b	4	-21444		0	179	Not Available																								Not Available	NOT HISPANIC OR LATINO	Not Available;Not Available	Not Available;Not Available	Not Available;Not Available
TCGA-BA-5557-01A-01R-1514-07	Tumor	TCGA-BA-5557	83.86.0	Nationwide Children's Hospital	22	HNSC	1D79CF5B-8B18-4484-8A3F-A3FA4CA053F2	12	TCGA	2016	YES	0	Oral Tongue	TCGA-BA-5557	7e0575ce-670b-4035-8a90-4d35279707b2	4	-15247		0	242	Not Available	TCGA-BA-5557-D9935	a4fee25f-96a9-4e15-9d54-f2abfb2829a0	Not Available	14	109	67	Cisplatin	Not Available	3	6	30	mg/m2	ADJUVANT	Not Applicable	1	Not Available	NO	Chemotherapy	Not Available	Not Available	Not Available	Not Available	2011	Not Available	HISPANIC OR LATINO	Not Available;Not Available	Not Available;Not Available	Not Available;Not Available
TCGA-BA-5558-01A-01R-1514-07	Tumor	TCGA-BA-5558	83.86.0	Nationwide Children's Hospital	22	HNSC	6D890E5F-733C-4E34-9FD9-E1B3945BA108	12	TCGA	2016	YES	0	Hard Palate	TCGA-BA-5558	6a1aa50c-097c-4e04-8ddd-12d50f8a5ac2	4	-23984		0	1636	Not Available																								Not Available	NOT HISPANIC OR LATINO	Not Available;Not Available	Not Available;Not Available	Not Available;Not Available
TCGA-BA-5559-01A-01R-1514-07	Tumor	TCGA-BA-5559	83.86.0	Nationwide Children's Hospital	22	HNSC	8004DB18-ED5A-470C-B06C-9041252F1C39	12	TCGA	2016	YES	0	Tonsil	TCGA-BA-5559	17b17d91-c3df-4b89-9c10-4db069aff656	5	-26286		0	1747	Not Available																								Not Available	NOT HISPANIC OR LATINO	NO;NO	NO;NO	NO;Not Available
TCGA-BA-6868-01B-12R-1915-07	Tumor	TCGA-BA-6868	151.75.0	Nationwide Children's Hospital	22	HNSC	039F5FA1-B2D5-4DDC-8DCD-082E93C149F7	12	TCGA	2016	YES	Not Available	Larynx	TCGA-BA-6868	ed61706c-7fc1-4c5f-b473-7b0888ac5b73	8	-19608		0	153	Not Available	TCGA-BA-6868-D14886;TCGA-BA-6868-D14891;TCGA-BA-6868-D14882;TCGA-BA-6868-D14884	3b2f71ea-6cb7-4952-8ce4-c0aa62d9a93d;b32a9625-f43f-4758-ad4a-89f5d662266b;c9cddced-57e8-485e-a375-e67a534d9aca;03df431f-dc92-4000-b991-46698522682e	Not Available;Not Available;Not Available;Not Available	19;19;19;19	48;118;48;13	13;69;14;13	Carboplatin;Cisplatin;Taxol;Erbitux	Not Available;Not Available;Not Available;Not Available	7;7;7;7	6;3;6;1	2248;540;1831;692	mg;mg;mg;mg	ADJUVANT;ADJUVANT;ADJUVANT;ADJUVANT	Not Applicable;Not Applicable;Not Applicable;Not Applicable	1;2;1;1	IV;IV;IV;IV	NO;NO;NO;NO	Chemotherapy;Chemotherapy;Chemotherapy;Chemotherapy;Targeted Molecular therapy	Not Available;Not Available;Not Available;Not Available	1746;515;1419;519	mg;mg;mg;mg	Not Available;Not Available;Not Available;Not Available	2011;2011;2011;2011	Not Available	NOT HISPANIC OR LATINO	Not Available;YES	Not Available;NO	Not Available;NO
TCGA-BA-6869-01A-11R-1873-07	Tumor	TCGA-BA-6869	145.84.0	Nationwide Children's Hospital	22	HNSC	BD6B3791-7D29-4BBC-94AF-F17D9680772A	12	TCGA	2016	YES	2	Larynx	TCGA-BA-6869	fafd6f5b-1d76-4537-bd1c-e0bd7b4e2166	8	-22765		0	244	Not Available																								Not Available	NOT HISPANIC OR LATINO	Not Available;Not Available	Not Available;Not Available	Not Available;Not Available
TCGA-BA-6870-01A-11R-1873-07	Tumor	TCGA-BA-6870	145.84.0	Nationwide Children's Hospital	22	HNSC	C18341A7-0897-4E17-8FD4-CEADA69D69FB	12	TCGA	2016	YES	Not Available	Larynx	TCGA-BA-6870	730c3b27-24d5-4a80-b659-db54cd2bc4fa	8	-22222	451	0		Not Available	TCGA-BA-6870-D14204	0e04b472-452f-40cf-8abf-fcefd3b40235	Not Available	8	152	60	Cisplatin	Not Available	7	Not Available	Not Available	Not Available	ADJUVANT	Not Applicable	1	Not Available	NO	Chemotherapy	Not Available	Not Available	Not Available	Not Available	2011	Not Available	NOT HISPANIC OR LATINO	Not Available	Not Available	Not Available
TCGA-BA-6871-01A-11R-1873-07	Tumor	TCGA-BA-6871	145.84.0	Nationwide Children's Hospital	22	HNSC	E105BE46-9AFF-484A-972B-465C9203A54E	12	TCGA	2016	YES	Not Available	Base of tongue	TCGA-BA-6871	bd62a587-6fe1-47ce-918d-055f2b38bb0e	8	-27708		0	63	Not Available																								Not Available	Not Available	Not Available;Not Available	Not Available;Not Available	Not Available;Not Available
TCGA-BA-6872-01A-11R-1873-07	Tumor	TCGA-BA-6872	145.84.0	Nationwide Children's Hospital	22	HNSC	724AC9B1-4F8B-4759-9577-F8D31999D855	12	TCGA	2016	YES	6	Floor of mouth	TCGA-BA-6872	3e5f451a-5882-4914-ae1a-95c898c2bcca	7	-17296	384	0		Not Available	TCGA-BA-6872-D14865	e9353bdd-fe93-4bad-9786-fd4d424d9db0	Not Available	22	Not Available	Not Available	Not Available	Not Available	7	Not Available	Not Available	Not Available	ADJUVANT	Not Applicable	1	Not Available	Not Available	Chemotherapy	Not Available	Not Available	Not Available	Not Available	2011	Not Available	NOT HISPANIC OR LATINO	Not Available	Not Available	Not Available
TCGA-BA-6873-01A-11R-1873-07	Tumor	TCGA-BA-6873	145.84.0	Nationwide Children's Hospital	22	HNSC	DE05DBED-A5C7-45D5-B05F-3405D74F430C	12	TCGA	2016	YES	0	Oral Tongue	TCGA-BA-6873	bf6b931e-cb2e-4cc0-b603-e9fc71fdc509	8	-10512		0	113	Not Available	TCGA-BA-6873-D14873	935866ce-b2bc-47fd-8d79-529515f4704f	Not Available	8	118	72	Cisplatin	Not Available	7	3	100	mg/m2	PROGRESSION	Not Applicable	1	IV	NO	Chemotherapy	Not Available	640	mg	Not Available	2011	Not Available	HISPANIC OR LATINO	YES	YES	NO
TCGA-BA-7269-01A-11R-2016-07	Tumor	TCGA-BA-7269	164.84.0	Nationwide Children's Hospital	22	HNSC	15D47907-7054-4A5A-AB5D-A4A4A05D2634	12	TCGA	2016	YES	2	Oral Tongue	TCGA-BA-7269	eb611a76-eecf-452c-bfbe-ab49b362f49c	10	-22609		0	236	Not Available																								Not Available	NOT HISPANIC OR LATINO	Not Available;Not Available	Not Available;Not Available	Not Available;Not Available
TCGA-BA-A4IF-01A-11R-A266-07	Tumor	TCGA-BA-A4IF	273.58.0	Nationwide Children's Hospital	22	HNSC	D2EFD36C-0B18-45BB-ACDC-F91A104E0EDA	12	TCGA	2016	YES	Not Available	Oropharynx	TCGA-BA-A4IF	28D2FD8E-ABE9-4EA3-87E4-4F2B61A33C90	17	-21635		0	523	Not Available	TCGA-BA-A4IF-D51699	72A21393-F5D6-495E-84DB-000D013180AC	Not Available	21	53	25	Cisplatin	Complete Response	11	Not Available	Not Available	Not Available	Not Available	Not Applicable	Not Available	Not Available	NO	Chemotherapy	Not Available	Not Available	Not Available	YES	2013	Not Available	NOT HISPANIC OR LATINO
TCGA-BA-A4IG-01A-11R-A266-07	Tumor	TCGA-BA-A4IG	273.58.0	Nationwide Children's Hospital	22	HNSC	BA289ABF-6AE1-47C4-9A69-71EFB8C042C0	12	TCGA	2016	YES	Not Available	Base of tongue	TCGA-BA-A4IG	54B295D4-6315-4416-BDE7-A221859F965C	17	-28402		0	519	Not Available	TCGA-BA-A4IG-D55785	737DB7A8-CBB2-4758-ADD3-3A873069F0E3	Not Available	15	140	79	Erbitux	Complete Response	1	Not Available	Not Available	Not Available	Not Available	Not Applicable	Not Available	Not Available	NO	Chemotherapy	Not Available	Not Available	Not Available	NO	2014	Not Available	NOT HISPANIC OR LATINO
TCGA-BA-A4IH-01A-11R-A266-07	Tumor	TCGA-BA-A4IH	273.58.0	Nationwide Children's Hospital	22	HNSC	72C7D06D-E0B7-4F41-8A08-38887B60602F	12	TCGA	2016	YES	4	Tonsil	TCGA-BA-A4IH	BD75D8EE-916B-4ABC-BF33-BCE6A4217076	17	-21094		0	201	Not Available	TCGA-BA-A4IH-D55787	100E1715-44FF-4BB6-9704-C2925F3056AD	Not Available	15	129	87	Cisplatin	Complete Response	1	Not Available	Not Available	Not Available	Not Available	Not Applicable	Not Available	Not Available	NO	Chemotherapy	Not Available	Not Available	Not Available	NO	2014	Not Available	NOT HISPANIC OR LATINO
TCGA-BA-A4II-01A-11R-A266-07	Tumor	TCGA-BA-A4II	273.58.0	Nationwide Children's Hospital	22	HNSC	0D1E477C-4E60-43D9-BA39-1192A7C9F23C	12	TCGA	2016	YES	2	Oropharynx	TCGA-BA-A4II	2855BF40-E5E1-4519-B47A-327BFC275279	17	-17011		0	603	Not Available																								Not Available	NOT HISPANIC OR LATINO
TCGA-BA-A6D8-01A-31R-A31N-07	Tumor	TCGA-BA-A6D8	318.55.0	Nationwide Children's Hospital	22	HNSC	54F681DF-0990-4857-9FDF-BCBDC69C04C4	12	TCGA	2016	YES	Not Available	Floor of mouth	TCGA-BA-A6D8	B39C64BB-122D-44B3-9672-D0DC8468CA93	16	-21778		0	513	Not Available	TCGA-BA-A6D8-D45515	E48C2867-CB04-45D0-9247-25DDEA0676A6	Not Available	16	154	112	Cisplatin	Complete Response	7	Not Available	Not Available	Not Available	Not Available	Not Applicable	Not Available	Not Available	NO	Chemotherapy	Not Available	Not Available	Not Available	NO	2013	Not Evaluated	Not Evaluated
TCGA-BA-A6DA-01A-31R-A31N-07	Tumor	TCGA-BA-A6DA	318.55.0	Nationwide Children's Hospital	22	HNSC	DCA906C9-AC49-4284-873F-E8408058B55C	12	TCGA	2016	YES	0	Larynx	TCGA-BA-A6DA	17885905-280F-40FA-943E-346ED45403EA	16	-15004		0	351	Not Available	TCGA-BA-A6DA-D45523	13D2DADB-5EF5-4C42-9962-C48136399B87	Not Available	16	110	68	Cisplatin	Complete Response	7	Not Available	Not Available	Not Available	Not Available	Not Applicable	Not Available	Not Available	NO	Chemotherapy	Not Available	Not Available	Not Available	NO	2013	Not Evaluated	NOT HISPANIC OR LATINO
TCGA-BA-A6DB-01A-11R-A30B-07	Tumor	TCGA-BA-A6DB	311.57.0	Nationwide Children's Hospital	22	HNSC	30B30762-6684-4518-9A36-07CFB154CEDB	12	TCGA	2016	YES	0	Oral Tongue	TCGA-BA-A6DB	207C8A26-1A2D-47D9-8DB8-A25A7FD8655A	16	-8967		0	216	Not Available																								Not Evaluated	NOT HISPANIC OR LATINO
TCGA-BA-A6DD-01A-12R-A31N-07	Tumor	TCGA-BA-A6DD	318.55.0	Nationwide Children's Hospital	22	HNSC	9DEFB65C-B65C-42E2-B443-F056712108F4	12	TCGA	2016	YES	2	Floor of mouth	TCGA-BA-A6DD	C4060CA5-33E0-4C83-B91C-742D75059BDC	17	-16401	173	0		Not Available	TCGA-BA-A6DD-D45576	F7273590-003F-4BFA-B78A-0035C0B93757	Not Available	17	163	96	Cisplatin	Clinical Progressive Disease	7	Not Available	Not Available	Not Available	Not Available	Not Applicable	Not Available	Not Available	NO	Chemotherapy	Not Available	Not Available	Not Available	NO	2013	Not Evaluated	NOT HISPANIC OR LATINO
TCGA-BA-A6DE-01A-22R-A31N-07	Tumor	TCGA-BA-A6DE	318.55.0	Nationwide Children's Hospital	22	HNSC	C65DA5C5-8683-45BB-A801-126A86600866	12	TCGA	2016	YES	1	Oral Tongue	TCGA-BA-A6DE	116AD004-929D-4C8D-8EEE-883D132E0FE5	17	-25874		0	182	Not Available																								Not Evaluated	NOT HISPANIC OR LATINO
TCGA-BA-A6DG-01A-21R-A30B-07	Tumor	TCGA-BA-A6DG	311.57.0	Nationwide Children's Hospital	22	HNSC	A29384EA-D443-40FE-B8E3-F5C304041FA2	12	TCGA	2016	YES	4	Oral Tongue	TCGA-BA-A6DG	B7AC2F06-012A-436E-AFDE-7E4D653C84D9	17	-18052	69	0		Not Available																								Not Evaluated	NOT HISPANIC OR LATINO
TCGA-BA-A6DI-01A-11R-A30B-07	Tumor	TCGA-BA-A6DI	311.57.0	Nationwide Children's Hospital	22	HNSC	8BA1E9E1-C027-4436-B207-378B5659DB95	12	TCGA	2016	YES	2	Larynx	TCGA-BA-A6DI	CB78EFB3-BC29-4DE7-9128-FDC4F9539B48	17	-22857	336	0		Not Available	TCGA-BA-A6DI-D45611	68373786-E3EC-411F-BF99-B2F086C61929	Not Available	17	53	18	Cisplatin	Complete Response	7	Not Available	Not Available	Not Available	Not Available	Not Applicable	Not Available	Not Available	NO	Chemotherapy	Not Available	Not Available	Not Available	NO	2013	Not Evaluated	NOT HISPANIC OR LATINO
TCGA-BA-A6DJ-01A-11R-A30B-07	Tumor	TCGA-BA-A6DJ	311.57.0	Nationwide Children's Hospital	22	HNSC	EED6B4DC-B7AC-452F-A195-945A298ED6B0	12	TCGA	2016	YES	0	Alveolar Ridge	TCGA-BA-A6DJ	0DE19185-3517-4E30-925B-7EB1F5079EC2	17	-22967		0	314	Not Available	TCGA-BA-A6DJ-D45625	508B061D-2F5E-4CF9-BFE5-6FA9F6CCB2F6	Not Available	17	140	105	Cisplatin	Complete Response	7	Not Available	Not Available	Not Available	Not Available	Not Applicable	Not Available	Not Available	NO	Chemotherapy	Not Available	Not Available	Not Available	NO	2013	Not Evaluated	NOT HISPANIC OR LATINO
TCGA-BA-A6DL-01A-21R-A30B-07	Tumor	TCGA-BA-A6DL	311.57.0	Nationwide Children's Hospital	22	HNSC	81ABF230-9310-4555-8814-34DA073CE5A5	12	TCGA	2016	YES	3	Oropharynx	TCGA-BA-A6DL	C9A36EB5-AC3E-424E-BC2E-303DE7105957	17	-21886		0	294	Not Available	TCGA-BA-A6DL-D58934;TCGA-BA-A6DL-D58935;TCGA-BA-A6DL-D58936	3CA53D1F-7B87-46DB-A1C5-5143BB2EBA01;39281D5B-B576-4367-A6A0-0C35CD494FC4;34CCA937-9C4B-481A-BAC8-04A2B89D1435	Not Available;Not Available;Not Available	29;29;29	56;56;56	21;21;21	Carboplatin;Taxol;Lapatinib	Complete Response;Complete Response;Complete Response	4;4;4	Not Available;Not Available;Not Available	Not Available;Not Available;Not Available	Not Available;Not Available;Not Available	Not Available;Not Available;Not Available	Not Applicable;Not Applicable;Not Applicable	Not Available;Not Available;Not Available	Not Available;Not Available;Not Available	NO;NO;NO	Chemotherapy;Chemotherapy;Chemotherapy	Not Available;Not Available;Not Available	Not Available;Not Available;Not Available	Not Available;Not Available;Not Available	YES;YES;YES	2014;2014;2014	Not Evaluated	NOT HISPANIC OR LATINO
TCGA-BA-A8YP-01A-11R-A39I-07	Tumor	TCGA-BA-A8YP	403.37.0	Nationwide Children's Hospital	22	HNSC	CDA79B35-F0BC-4315-8051-086D976AD792	12	TCGA	2016	YES	1	Oropharynx	TCGA-BA-A8YP	A2D42990-747C-4618-88DD-E2DECE8E566F	13	-18355		0	142	Not Available	TCGA-BA-A8YP-D57522	5B1DEBA1-9AA7-42B1-91D2-05322DC09136	Not Available	13	100	39	Not Available	Complete Response	3	Not Available	Not Available	Not Available	Not Available	Not Applicable	Not Available	Not Available	NO	Chemotherapy	Not Available	Not Available	Not Available	NO	2014	Not Available	NOT HISPANIC OR LATINO
TCGA-BB-4217-01A-11R-2081-07	Tumor	TCGA-BB-4217	188.78.0	Nationwide Children's Hospital	22	HNSC	79104FE4-DDCC-4E66-A310-88A8A2463E21	12	TCGA	2016	YES	10	Larynx	TCGA-BB-4217	248fa778-0758-4681-a31f-371ea8d376e6	22	-25020		0	187	Not Available																								Not Available	NOT HISPANIC OR LATINO	Not Available	Not Available	Not Available
TCGA-BB-4223-01A-01R-1436-07	Tumor	TCGA-BB-4223	54.89.0	Nationwide Children's Hospital	22	HNSC	32EF149B-80EC-49A2-AC31-8BF05488B4EA	12	TCGA	2016	NO	Not Available	Tonsil	TCGA-BB-4223	05f01280-bf77-4682-a7a8-20dd0eac77bd	22	-17608		0	2878	Not Available	TCGA-BB-4223-D20412	c91a184c-ad1a-4707-baab-92a464725a0c	Not Available	10	140	98	cisplatin	Not Available	1	6	100	mg/m2	ADJUVANT	Not Applicable	1	IV	NO	Chemotherapy	Not Available	600	mg/m2	Not Available	2012	Not Available	NOT HISPANIC OR LATINO	Not Available	Not Available	Not Available
TCGA-BB-4224-01A-01R-1436-07	Tumor	TCGA-BB-4224	54.89.0	Nationwide Children's Hospital	22	HNSC	D601F075-FFA1-48FE-BC2D-16A25FBFA4EB	12	TCGA	2016	YES	1	Oral Tongue	TCGA-BB-4224	58574e35-8a30-4207-b127-59fff7c87a43	22	-19119		0	278	Not Available	TCGA-BB-4224-D19843;TCGA-BB-4224-D19841;TCGA-BB-4224-D19842;TCGA-BB-4224-D19774	0cb914b5-6dc8-4911-97a6-42457d3cf741;894265a0-4a7c-4bf6-b6f4-5cd369efaf4b;6c19f784-9f5f-4b82-8b86-139683be4b79;c20f37a0-8d1c-4a3f-ae8c-c3a3574b4eca	Not Available;Not Available;Not Available;Not Available	22;22;22;23	2799;202;243;202	2786;182;229;182	oxaliplatin;cisplatin;gemcitabine;Taxotere	Not Available;Not Available;Not Available;Not Available	12;12;12;12	2;2;2;2	Not Available;75;Not Available;75	mg/m2;mg/m2;mg/m2;mg/m2	PALLIATIVE;PALLIATIVE;PALLIATIVE;PALLIATIVE	Not Applicable;Not Applicable;Not Applicable;Not Applicable	2;1;2;1	IV;IV;IV;IV	NO;NO;NO;NO	Chemotherapy;Chemotherapy;Chemotherapy;Chemotherapy	Not Available;Not Available;Not Available;Not Available	Not Available;150;Not Available;150	mg/m2;mg/m2;mg/m2;mg/m2	Not Available;Not Available;Not Available;Not Available	2011;2011;2011;2011	Not Available	NOT HISPANIC OR LATINO	YES	NO	NO
TCGA-BB-4225-01A-01R-1436-07	Tumor	TCGA-BB-4225	54.89.0	Nationwide Children's Hospital	22	HNSC	42BD8352-3E1C-446F-9F04-0AA053A2B23C	12	TCGA	2016	YES	1	Base of tongue	TCGA-BB-4225	c1f50a22-38df-41cc-a1f4-f7985504a7ac	4	-26687		0	140	Not Available	TCGA-BB-4225-D20431	0407d87c-3797-4d73-b6eb-b9b522297bba	Not Available	11	Not Available	Not Available	Not Available	Not Available	1	Not Available	Not Available	Not Available	Not Available	Not Applicable	1	Not Available	NO	Chemotherapy	Not Available	Not Available	Not Available	Not Available	2012	Not Available	NOT HISPANIC OR LATINO	Not Available	Not Available	Not Available
TCGA-BB-4227-01A-01R-1873-07	Tumor	TCGA-BB-4227	145.84.0	Nationwide Children's Hospital	22	HNSC	0EBC8F61-7FC9-4273-AE34-01F401AC5386	12	TCGA	2016	YES	3	Hypopharynx	TCGA-BB-4227	b8ac8500-abcd-40c4-9c24-7af557fd260a	27	-24322		0	133	Not Available	TCGA-BB-4227-D20433;TCGA-BB-4227-D20432	6427464f-edd6-45a2-97b8-8c0b4d46b173;2b97a0b5-83ad-4595-8bd6-f189c149e085	Not Available;Not Available	11;11	Not Available;Not Available	Not Available;Not Available	docetaxel;cisplatin	Not Available;Not Available	1;1	4;4	Not Available;Not Available	Not Available;Not Available	PALLIATIVE;PALLIATIVE	Not Applicable;Not Applicable	1;1	Not Available;Not Available	NO;NO	Chemotherapy;Chemotherapy	Not Available;Not Available	Not Available;Not Available	Not Available;Not Available	Not Available;Not Available	2012;2012	Not Available	NOT HISPANIC OR LATINO	Not Available	Not Available	Not Available
TCGA-BB-4228-01A-01R-1436-07	Tumor	TCGA-BB-4228	54.89.0	Nationwide Children's Hospital	22	HNSC	85D229E3-5616-4E34-9285-C7E60926F5D8	12	TCGA	2016	YES	Not Available	Base of tongue	TCGA-BB-4228	cac30b32-03ef-4ecb-88d8-d5577ab6b2a6	22	-18536		0	558	Not Available																								Not Available	NOT HISPANIC OR LATINO	Not Available	Not Available	Not Available
TCGA-BB-8596-01A-11R-2403-07	Tumor	TCGA-BB-8596	241.67.0	Nationwide Children's Hospital	22	HNSC	7108108A-F67A-474E-93D8-4909FFEDEC96	12	TCGA	2016	YES	1	Hypopharynx	TCGA-BB-8596	5646f226-e2ce-45ef-8aa2-4841ec6b56b0	26	-25408		0	2161	Not Available																								Not Available	NOT HISPANIC OR LATINO
TCGA-BB-8601-01A-11R-2403-07	Tumor	TCGA-BB-8601	241.67.0	Nationwide Children's Hospital	22	HNSC	21AF03DB-714E-48C9-A6E5-B7818B1E064A	12	TCGA	2016	YES	0	Floor of mouth	TCGA-BB-8601	360726f4-9b50-422d-b498-5acbbc3713ae	26	-30721		0	624	Not Available																								Not Available	NOT HISPANIC OR LATINO
TCGA-BB-A5HU-01A-11R-A28V-07	Tumor	TCGA-BB-A5HU	301.57.0	Nationwide Children's Hospital	22	HNSC	988BE2E0-0EFE-4E0C-B7A2-878F52D80DD4	12	TCGA	2016	YES	0	Oral Cavity	TCGA-BB-A5HU	F35A0655-7504-4BD6-A9F3-6F3E59FD84B1	18	-17502		0	383	Not Available	TCGA-BB-A5HU-D42910	6C67DA57-560F-46C6-A3F3-6E663790DC1E	Not Available	6	97	69	Cisplatin	Complete Response	6	Not Available	Not Available	Not Available	Not Available	Not Applicable	Not Available	Not Available	NO	Chemotherapy	Not Available	Not Available	Not Available	NO	2013	Not Evaluated	NOT HISPANIC OR LATINO
TCGA-BB-A5HY-01A-11R-A28V-07	Tumor	TCGA-BB-A5HY	301.57.0	Nationwide Children's Hospital	22	HNSC	9A8A3597-C2F9-450C-9607-5BB35B33060C	12	TCGA	2016	YES	Not Available	Hypopharynx	TCGA-BB-A5HY	0394060D-010E-405F-983D-DB525F01F2C3	18	-23640		0	308	Not Available	TCGA-BB-A5HY-D43907	E51C395A-C307-44A2-A0A7-C9284F235383	Not Available	6	121	84	Cisplatin	Complete Response	6	Not Available	Not Available	Not Available	Not Available	Not Applicable	Not Available	Not Available	NO	Chemotherapy	Not Available	Not Available	Not Available	NO	2013	Not Evaluated	NOT HISPANIC OR LATINO
TCGA-BB-A5HZ-01A-21R-A28V-07	Tumor	TCGA-BB-A5HZ	301.57.0	Nationwide Children's Hospital	22	HNSC	E33D7144-855C-450B-A1FA-E521C57A2187	12	TCGA	2016	YES	0	Oral Cavity	TCGA-BB-A5HZ	A88D6F62-88DA-40C4-BC16-7FE58F038B8C	18	-23906		0	350	Not Available																								Not Evaluated	NOT HISPANIC OR LATINO
TCGA-BB-A6UM-01A-12R-A34R-07	Tumor	TCGA-BB-A6UM	355.48.0	Nationwide Children's Hospital	22	HNSC	3334E238-9560-4E56-8A97-B61E135F0825	12	TCGA	2016	NO	Not Available	Tonsil	TCGA-BB-A6UM	03C3AE62-D0AA-412E-BD3C-4577FC9F919C	23	-19194		0	393	Not Available	TCGA-BB-A6UM-D65420	EEC81C40-40F4-4307-89D2-1F65D23FA652	Not Available	23	181	150	Not Available	Complete Response	9	Not Available	Not Available	Not Available	Not Available	Not Applicable	Not Available	Not Available	NO	Chemotherapy	Not Available	Not Available	Not Available	NO	2014	Not Available	NOT HISPANIC OR LATINO
TCGA-BB-A6UO-01A-12R-A34R-07	Tumor	TCGA-BB-A6UO	355.48.0	Nationwide Children's Hospital	22	HNSC	0C6B631C-9538-4662-8998-07CCF7FE5A6C	12	TCGA	2016	NO	Not Available	Oral Tongue	TCGA-BB-A6UO	CCD672DF-44D4-421F-8727-0A05E513B6C8	23	-22506	268	0		Not Available																								Not Available	NOT HISPANIC OR LATINO
TCGA-C9-A47Z-01A-11R-A24H-07	Tumor	TCGA-C9-A47Z	260.56.0	Nationwide Children's Hospital	22	HNSC	A2876B6F-AA6B-4FA9-89E0-B8172FCD3347	12	TCGA	2016	NO	Not Available	Oral Tongue	TCGA-C9-A47Z	64A195F6-2212-4E81-BCCC-E39C77A10908	11	-26592		0	5	Not Available																								Not Available	NOT HISPANIC OR LATINO
TCGA-C9-A480-01A-12R-A24H-07	Tumor	TCGA-C9-A480	260.56.0	Nationwide Children's Hospital	22	HNSC	CF4F9FD2-E914-4175-8179-AE1CA698E9B1	12	TCGA	2016	NO	Not Available	Oral Tongue	TCGA-C9-A480	E8F0CD72-E423-45E0-AD1E-83AA7FB354E3	11	-16567		0	4	Not Available																								Not Available	NOT HISPANIC OR LATINO
TCGA-CN-4722-01A-01R-1436-07	Tumor	TCGA-CN-4722	54.89.0	Nationwide Children's Hospital	22	HNSC	C699B6F4-A86E-49C9-A0D9-E356119C8310	12	TCGA	2016	NO	Not Available	Larynx	TCGA-CN-4722	b64bfca1-033c-4501-a900-103ac105c084	27	-22299		0	193	Not Available																								Amplified	NOT HISPANIC OR LATINO	Not Available	Not Available	Not Available
TCGA-CN-4723-01A-01R-1436-07	Tumor	TCGA-CN-4723	54.89.0	Nationwide Children's Hospital	22	HNSC	F3B97F40-9742-4B17-BC05-BA5F1A292060	12	TCGA	2016	YES	Not Available	Larynx	TCGA-CN-4723	96163e94-4a14-4907-a57a-cfab4caf19a4	27	-24815		0	412	Not Available																								Not Available	NOT HISPANIC OR LATINO	Not Available	Not Available	Not Available
TCGA-CN-4725-01A-01R-1436-07	Tumor	TCGA-CN-4725	54.89.0	Nationwide Children's Hospital	22	HNSC	E251BF3E-1906-4120-93DA-8171E32C6CAA	12	TCGA	2016	NO	Not Available	Oral Tongue	TCGA-CN-4725	3be2ace5-1c2a-49e9-8da9-ceed6119530b	27	-22171		0	310	Not Available																								Amplified	NOT HISPANIC OR LATINO	Not Available	Not Available	Not Available
TCGA-CN-4726-01A-01R-1436-07	Tumor	TCGA-CN-4726	54.89.0	Nationwide Children's Hospital	22	HNSC	66A8C2E3-2EEA-4B8F-AC29-84277C6A9157	12	TCGA	2016	YES	Not Available	Buccal Mucosa	TCGA-CN-4726	5da2dbde-735b-4f05-b6d7-76de54d6d6ac	28	-25194	142	0		Not Available	TCGA-CN-4726-D10835	be221675-cfcd-4752-839a-cb367153d4e4	Not Available	28	94	90	CISPLATIN	Not Available	4	1	100	mg/m2/wk	RECURRENCE	Not Applicable	1	IV	NO	Chemotherapy	Not Available	Not Available	Not Available	Not Available	2011	Amplified	NOT HISPANIC OR LATINO	YES	YES	NO
TCGA-CN-4727-01A-01R-1436-07	Tumor	TCGA-CN-4727	54.89.0	Nationwide Children's Hospital	22	HNSC	A2C28AA8-90FC-43D3-9314-F6D9034EFD93	12	TCGA	2016	YES	Not Available	Larynx	TCGA-CN-4727	12d05e8f-8d13-47c1-b713-2250f6abcef9	28	-20748		0	194	Not Available	TCGA-CN-4727-D10840	387ea7b9-504d-4bfc-adb0-f9273bd4bc4b	Not Available	28	143	83	CISPLATIN	Not Available	4	Not Available	Not Available	mg/m2/wk	ADJUVANT	Not Applicable	1	IV	NO	Chemotherapy	Not Available	Not Available	mg/m2/wk	Not Available	2011	Unamplified	NOT HISPANIC OR LATINO	Not Available	Not Available	Not Available
TCGA-CN-4728-01A-01R-1436-07	Tumor	TCGA-CN-4728	54.89.0	Nationwide Children's Hospital	22	HNSC	ADC19E00-5380-4C9D-ACDA-AF97348DE5A6	12	TCGA	2016	YES	7	Oral Cavity	TCGA-CN-4728	7152edc3-0a5b-4aed-b0c6-63f913dff272	28	-20660		0	325	Not Available	TCGA-CN-4728-D10848;TCGA-CN-4728-D10846	dc6b6705-34ec-4c39-8f9b-79bee2da6c7f;7160c518-a7f4-4b43-a8a6-147a30bed55b	Not Available;Not Available	28;28	87;87	44;44	VECTIBIX;CISPLATIN	Not Available;Not Available	4;4	7;7	2.5;30	mg/kg;mg/m2/wk	ADJUVANT;ADJUVANT	Not Applicable;Not Applicable	1;1	IV;IV	NO;NO	Chemotherapy;Chemotherapy	Not Available;Not Available	Not Available;Not Available	mg/kg;Not Available	Not Available;Not Available	2010;2011	Not Available	NOT HISPANIC OR LATINO	Not Available	Not Available	Not Available
TCGA-CN-4729-01A-01R-1436-07	Tumor	TCGA-CN-4729	54.89.0	Nationwide Children's Hospital	22	HNSC	600FB3C2-8431-4842-99BF-32FEED8823B3	12	TCGA	2016	YES	3	Oral Cavity	TCGA-CN-4729	2fc960bd-01b0-422d-ad33-34520fa3df0e	28	-26713		0	156	Not Available																								Not Available	NOT HISPANIC OR LATINO	Not Available	Not Available	Not Available
TCGA-CN-4730-01A-01R-1436-07	Tumor	TCGA-CN-4730	54.89.0	Nationwide Children's Hospital	22	HNSC	D7536DF8-DCC2-4184-83DF-1061BBB0F8C6	12	TCGA	2016	YES	Not Available	Floor of mouth	TCGA-CN-4730	35c1f2c6-771c-4533-82df-f8e2ec7107d7	28	-22828		0	343	Not Available																								Not Available	NOT HISPANIC OR LATINO	Not Available	Not Available	Not Available
TCGA-CN-4731-01A-01R-1436-07	Tumor	TCGA-CN-4731	54.89.0	Nationwide Children's Hospital	22	HNSC	A7358FC1-F5D8-4FA0-B6B7-C375F9E894F9	12	TCGA	2016	YES	Not Available	Buccal Mucosa	TCGA-CN-4731	50e25a4b-2eb2-4770-9a2d-8922a1e0ab56	29	-23194		0	383	Not Available	TCGA-CN-4731-D10894;TCGA-CN-4731-D20686;TCGA-CN-4731-D36092;TCGA-CN-4731-D36094	5b1e2172-4a88-4d66-a2b1-1bbfc3b32648;a0702d5c-599f-444a-9a1b-3d1a911376a1;CC4F8925-0183-4D8D-A86A-EE7453FD1848;8F881032-DBC0-4BC4-8C23-E3BA38095655	Not Available;Not Available;Not Available;Not Available	29;19;18;18	301;560;869;958	273;546;827;937	ERBITUX;ERBITUX;erbitux;taxotere	Not Available;Not Available;Clinical Progressive Disease;Clinical Progressive Disease	4;1;10;10	Not Available;3;Not Available;Not Available	Not Available;100;Not Available;Not Available	mg/m2/wk;mg/mL;Not Available;Not Available	RECURRENCE;RECURRENCE;Not Available;Not Available	Not Applicable;Not Applicable;Not Applicable;Not Applicable	1;1;Not Available;Not Available	IV;IV;Not Available;Not Available	NO;NO;NO;NO	Chemotherapy;Chemotherapy;Chemotherapy;Chemotherapy	Not Available;Not Available;Not Available;Not Available	Not Available;300;Not Available;Not Available	mg/m2/wk;mg/mL;Not Available;Not Available	Not Available;Not Available;NO;YES	2011;2012;2012;2012	Unamplified	NOT HISPANIC OR LATINO	YES;YES	YES;YES	NO;NO
TCGA-CN-4733-01A-02R-1873-07	Tumor	TCGA-CN-4733	145.84.0	Nationwide Children's Hospital	22	HNSC	7B34E9BF-10CB-4863-8463-0F3230A35882	12	TCGA	2016	NO	Not Available	Oral Tongue	TCGA-CN-4733	dedd71b4-8537-4947-839e-90aceddd0893	17	-22561		0	523	Not Available																								Amplified	NOT HISPANIC OR LATINO	Not Available	Not Available	Not Available
TCGA-CN-4734-01A-01R-1436-07	Tumor	TCGA-CN-4734	54.89.0	Nationwide Children's Hospital	22	HNSC	6CAA0B18-B994-44DD-BA1F-EA2AB44CF28F	12	TCGA	2016	YES	Not Available	Buccal Mucosa	TCGA-CN-4734	b80fdc9a-341d-4277-9664-8e8f770d9ddd	29	-25753		0	227	Not Available																								Amplified	NOT HISPANIC OR LATINO	Not Available	Not Available	Not Available
TCGA-CN-4735-01A-01R-1436-07	Tumor	TCGA-CN-4735	54.89.0	Nationwide Children's Hospital	22	HNSC	435D4BB8-BBE1-422F-972C-52D7490E1827	12	TCGA	2016	YES	5	Larynx	TCGA-CN-4735	fe844945-3ea9-449e-993c-df392fabcfd0	29	-19107		0	369	Not Available	TCGA-CN-4735-D10900;TCGA-CN-4735-D10899	c61e070f-7f94-453f-8706-df70e5a03fb0;4e50614f-8814-4ed7-b58f-ed86d85017e3	Not Available;Not Available	29;29	88;88	46;46	VECTIBIX;CISPLATIN	Not Available;Not Available	4;4	Not Available;3	2.5;30	mg/kg;mg/m2/wk	ADJUVANT;ADJUVANT	Not Applicable;Not Applicable	1;1	IV;IV	NO;NO	Chemotherapy;Chemotherapy	Not Available;Not Available	Not Available;Not Available	Not Available;Not Available	Not Available;Not Available	2011;2011	Unamplified	NOT HISPANIC OR LATINO	Not Available	Not Available	Not Available
TCGA-CN-4736-01A-01R-1436-07	Tumor	TCGA-CN-4736	54.89.0	Nationwide Children's Hospital	22	HNSC	77BAFFB8-9B9B-4141-AE19-CC68813EBFCF	12	TCGA	2016	YES	2	Oral Tongue	TCGA-CN-4736	0fb3e5ff-54f0-43c5-9322-541bb7825e7f	2	-25683	395	0		Not Available	TCGA-CN-4736-D10927	30badbe5-2cb4-485e-bd1d-ebc6e8552ba3	Not Available	2	322	262	CISPLATIN	Not Available	5	Not Available	Not Available	mg/m2	RECURRENCE	Not Applicable	1	IV	NO	Chemotherapy	Not Available	Not Available	mg/m2	Not Available	2011	Not Available	NOT HISPANIC OR LATINO	YES	YES	YES
TCGA-CN-4737-01A-01R-1436-07	Tumor	TCGA-CN-4737	54.89.0	Nationwide Children's Hospital	22	HNSC	C37327BE-1C46-479A-8F9A-2CA0380E27EB	12	TCGA	2016	NO	Not Available	Oral Tongue	TCGA-CN-4737	1f744ada-6de1-446d-b62c-76a7fc8b40af	2	-7301		0	240	Not Available	TCGA-CN-4737-D10937;TCGA-CN-4737-D10934	f0952334-2f5c-4d6f-9f2f-68072c695a88;f4c7ec15-db76-4158-b3b0-605213e15e9b	Not Available;Not Available	2;2	85;85	43;43	VECTIBIX;CISPLATIN	Not Available;Not Available	5;5	Not Available;Not Available	Not Available;Not Available	mg/mL;mg/mL	ADJUVANT;ADJUVANT	Not Applicable;Not Applicable	1;1	IV;IV	NO;NO	Chemotherapy;Chemotherapy	Not Available;Not Available	100;50	mg/mL;mg/mL	Not Available;Not Available	2011;2011	Amplified	NOT HISPANIC OR LATINO	Not Available	Not Available	Not Available
TCGA-CN-4738-01A-02R-1514-07	Tumor	TCGA-CN-4738	83.86.0	Nationwide Children's Hospital	22	HNSC	49754D67-3AF2-4322-BF80-D635A323C490	12	TCGA	2016	YES	17	Larynx	TCGA-CN-4738	97640ef0-0259-4244-95ba-48d28c60b372	25	-19621	436	0		Not Available																								Not Available	NOT HISPANIC OR LATINO	Not Available	Not Available	Not Available
TCGA-CN-4739-01A-02R-1514-07	Tumor	TCGA-CN-4739	83.86.0	Nationwide Children's Hospital	22	HNSC	1DC963D5-C4C6-42B0-869F-998D9CF6D186	12	TCGA	2016	YES	Not Available	Larynx	TCGA-CN-4739	7e3b90c1-8772-4e12-8050-a156558beb82	25	-26081		0	348	Not Available	TCGA-CN-4739-D9476	bc61a36c-e119-4661-8146-2e1edb26f96f	Not Available	25	161	115	carboplatin	Not Available	3	Not Available	Not Available	AUC	ADJUVANT	Not Applicable	Not Available	IV	NO	Chemotherapy	Not Available	Not Available	AUC	Not Available	2011	Not Available	NOT HISPANIC OR LATINO	Not Available;Not Available	Not Available;Not Available	Not Available;Not Available
TCGA-CN-4740-01A-01R-1436-07	Tumor	TCGA-CN-4740	54.89.0	Nationwide Children's Hospital	22	HNSC	8658B745-6EDF-4838-BF9A-11BFF624F793	12	TCGA	2016	YES	4	Oral Cavity	TCGA-CN-4740	e37c83dc-c2c4-4e5f-a57b-39ffcf9aa3cf	2	-29186		0	811	Not Available	TCGA-CN-4740-D10988;TCGA-CN-4740-D10989	a40260f1-e16e-4370-9bd3-9e38d8d1e58d;d12954a0-0c1c-48eb-8e1b-5a23b22698c4	Not Available;Not Available	2;2	276;791	260;757	ERBITUX;everolimus	Not Available;Not Available	5;5	Not Available;1	Not Available;Not Available	mg/mL;mg/mL	RECURRENCE;RECURRENCE	Not Applicable;Not Applicable	1;1	IV;IV	NO;NO	Chemotherapy;Chemotherapy	Not Available;Not Available	Not Available;Not Available	mg/mL;mg/mL	Not Available;Not Available	2011;2011	Not Available	Not Available	YES;YES;Not Available	NO;YES;Not Available	NO;NO;Not Available
TCGA-CN-4741-01A-01R-1436-07	Tumor	TCGA-CN-4741	54.89.0	Nationwide Children's Hospital	22	HNSC	B7047B9E-6BC9-4C1E-AD4F-21528B14F4B9	12	TCGA	2016	NO	Not Available	Alveolar Ridge	TCGA-CN-4741	277b02e9-ded5-4980-845d-af53690000ac	3	-27506		0	876	Not Available	TCGA-CN-4741-D11043;TCGA-CN-4741-D69608	0f3d429f-a513-443b-b1e0-ce4c4fbd1aa3;95F7AC03-5CD2-42ED-917F-6FFFD246600F	Not Available;Not Available	20;15	163;1778	103;1771	CISPLATIN;erbitux	Not Available;Complete Response	5;1	Not Available;Not Available	Not Available;Not Available	mg;Not Available	ADJUVANT;Not Available	Not Applicable;Not Applicable	1;Not Available	IV;Not Available	NO;NO	Chemotherapy;Immunotherapy	Not Available;Not Available	Not Available;Not Available	mg;Not Available	Not Available;NO	2011;2015	Not Available	NOT HISPANIC OR LATINO	Not Available;Not Available	Not Available;Not Available	Not Available;Not Available
TCGA-CN-4742-01A-02R-1514-07	Tumor	TCGA-CN-4742	83.86.0	Nationwide Children's Hospital	22	HNSC	55BB561F-B756-42FB-ACF7-2763C978DE5F	12	TCGA	2016	YES	6	Oral Tongue	TCGA-CN-4742	444e5bfc-d4e5-4b0d-b96d-88ecea8873e9	25	-17793	397	0		Not Available	TCGA-CN-4742-D9490	138ac124-e3e2-4117-a2b1-9e72f9543b6e	Not Available	25	237	168	CISPLATIN	Not Available	3	Not Available	Not Available	AUC	ADJUVANT	Not Applicable	Not Available	IV	NO	Chemotherapy	Not Available	Not Available	AUC	Not Available	2011	Not Available	NOT HISPANIC OR LATINO	Not Available	Not Available	Not Available
TCGA-CN-5355-01A-01R-1436-07	Tumor	TCGA-CN-5355	54.89.0	Nationwide Children's Hospital	22	HNSC	7A3F4E67-BE3E-412B-BE64-697F3999C515	12	TCGA	2016	YES	Not Available	Larynx	TCGA-CN-5355	45a10908-19e6-421a-8903-1440bfa57c9d	4	-23670		0	279	Not Available																								Not Available	NOT HISPANIC OR LATINO	Not Available	Not Available	Not Available
TCGA-CN-5356-01A-01R-1436-07	Tumor	TCGA-CN-5356	54.89.0	Nationwide Children's Hospital	22	HNSC	CBDF6626-4C0E-4432-8811-F1E581F7F3CB	12	TCGA	2016	NO	Not Available	Larynx	TCGA-CN-5356	e1fed7aa-2bce-45ae-b0c6-7f50ef97e425	3	-20540		0	289	Not Available																								Unamplified	NOT HISPANIC OR LATINO	Not Available	Not Available	Not Available
TCGA-CN-5358-01A-01R-1514-07	Tumor	TCGA-CN-5358	83.86.0	Nationwide Children's Hospital	22	HNSC	27628A97-AB36-40CF-9979-1D080C1A053E	12	TCGA	2016	YES	6	Floor of mouth	TCGA-CN-5358	b4e0c62d-f2f6-4243-9e0f-ae2ad4ca4bb8	6	-22138		0	173	Not Available	TCGA-CN-5358-D10101;TCGA-CN-5358-D10100	bbd10715-5fbc-41cb-84ad-a254e9355ec3;37dbe7fb-7d7a-4925-82c8-08f3f6de109a	Not Available;Not Available	7;7	Not Available;Not Available	223;202	CARBOPLATIN;CISPLATIN	Not Available;Not Available	4;4	Not Available;Not Available	Not Available;Not Available	AUC;AUC	RECURRENCE;RECURRENCE	Not Applicable;Not Applicable	2;1	IV;IV	YES;YES	Chemotherapy;Chemotherapy	Not Available;Not Available	Not Available;Not Available	AUC;AUC	Not Available;Not Available	2011;2011	Unamplified	NOT HISPANIC OR LATINO	YES	YES	YES
TCGA-CN-5359-01A-01R-1436-07	Tumor	TCGA-CN-5359	54.89.0	Nationwide Children's Hospital	22	HNSC	BF87C5B4-7A37-4AC2-9267-4E4BBB9410F6	12	TCGA	2016	YES	Not Available	Floor of mouth	TCGA-CN-5359	bfaa4b3f-3e38-478e-99b3-013f2cda80f5	4	-21858	377	0		Not Available	TCGA-CN-5359-D11136;TCGA-CN-5359-D11139	b47651e7-2e95-4647-9b80-8e3f8c145046;1456374e-e04e-4a13-b6dd-7845cd4b9181	Not Available;Not Available	4;4	79;79	54;54	cisplatin;panitumumab	Not Available;Not Available	5;5	Not Available;Not Available	10;20	mg/mL;mg/mL	ADJUVANT;ADJUVANT	Not Applicable;Not Applicable	1;1	IV;IV	NO;NO	Chemotherapy;Chemotherapy	Not Available;Not Available	80;160	mg/mL;mg/mL	Not Available;Not Available	2011;2011	Unamplified	NOT HISPANIC OR LATINO	NO	NO	NO
TCGA-CN-5360-01A-01R-1436-07	Tumor	TCGA-CN-5360	54.89.0	Nationwide Children's Hospital	22	HNSC	B8763336-4165-4B0B-9DA7-08DE7BCC8CFC	12	TCGA	2016	YES	Not Available	Larynx	TCGA-CN-5360	5793879b-f663-4a10-9bd9-1acd2e189650	3	-25034		0	867	Not Available	TCGA-CN-5360-D11047	901ff2ac-5284-4b23-b1fb-35fee574c05f	Not Available	3	125	80	CISPLATIN	Not Available	5	3	Not Available	mg	ADJUVANT	Not Applicable	1	IV	NO	Chemotherapy	Not Available	Not Available	mg	Not Available	2011	Not Available	NOT HISPANIC OR LATINO	Not Available;Not Available	Not Available;Not Available	Not Available;Not Available
TCGA-CN-5361-01A-01R-1436-07	Tumor	TCGA-CN-5361	54.89.0	Nationwide Children's Hospital	22	HNSC	9DCB2C39-CE26-4F58-A2E9-409E58FBC0EE	12	TCGA	2016	YES	Not Available	Larynx	TCGA-CN-5361	044579ef-16a6-4f00-b951-edc423d8a14f	3	-29383		0	194	Not Available																								Not Available	NOT HISPANIC OR LATINO	Not Available	Not Available	Not Available
TCGA-CN-5363-01A-01R-1436-07	Tumor	TCGA-CN-5363	54.89.0	Nationwide Children's Hospital	22	HNSC	C893AE8D-DC57-4A50-A02D-82CCC940D040	12	TCGA	2016	YES	Not Available	Larynx	TCGA-CN-5363	291b069c-9dde-4e1e-8430-85146bc94338	3	-17635	253	0		Not Available																								Not Available	NOT HISPANIC OR LATINO	Not Available	Not Available	NO
TCGA-CN-5364-01A-01R-1436-07	Tumor	TCGA-CN-5364	54.89.0	Nationwide Children's Hospital	22	HNSC	74D8AAE2-E1E3-4B26-A269-24915B1F6597	12	TCGA	2016	YES	Not Available	Floor of mouth	TCGA-CN-5364	13f63218-0949-41e6-a661-c844414c45b5	4	-20362	493	0		Not Available	TCGA-CN-5364-D11177;TCGA-CN-5364-D11176	05b57b8e-479e-4fbe-be51-1d514ce6a088;06b941e6-c869-4cb3-8019-ca4f5ec64875	Not Available;Not Available	4;4	303;303	231;231	TAXOL;CARBOPLATIN	Not Available;Not Available	5;5	Not Available;Not Available	Not Available;Not Available	mg;mg	ADJUVANT;ADJUVANT	Not Applicable;Not Applicable	1;1	IV;IV	NO;NO	Chemotherapy;Chemotherapy	Not Available;Not Available	Not Available;Not Available	mg;mg	Not Available;Not Available	2011;2011	Not Available	NOT HISPANIC OR LATINO	Not Available	Not Available	Not Available
TCGA-CN-5365-01A-01R-1436-07	Tumor	TCGA-CN-5365	54.89.0	Nationwide Children's Hospital	22	HNSC	A62633D8-010A-4BA5-893D-8C62F0027985	12	TCGA	2016	YES	Not Available	Tonsil	TCGA-CN-5365	4cffea0b-90a7-4c86-a73f-bb8feca3ada7	3	-14190	351	0		Not Available																								Not Available	NOT HISPANIC OR LATINO	Not Available	Not Available	Not Available
TCGA-CN-5366-01A-01R-1436-07	Tumor	TCGA-CN-5366	54.89.0	Nationwide Children's Hospital	22	HNSC	F5D73CEC-BB65-4F44-A2CD-05A765032976	12	TCGA	2016	YES	6	Hypopharynx	TCGA-CN-5366	30eb06a5-8e88-4c46-bebb-fb93ca07f108	3	-18904	360	0		Not Available	TCGA-CN-5366-D11098	29317f3b-46f7-48b3-9b88-ad1be4bbcb5f	Not Available	3	147	86	Unknown	Not Available	5	Not Available	Not Available	mg	ADJUVANT	Not Applicable	1	IV	NO	Chemotherapy	Not Available	Not Available	mg	Not Available	2011	Not Available	NOT HISPANIC OR LATINO	NO	NO	NO
TCGA-CN-5367-01A-01R-1436-07	Tumor	TCGA-CN-5367	54.89.0	Nationwide Children's Hospital	22	HNSC	2117CC55-4D8A-46C1-B3BC-CD4A74E028EE	12	TCGA	2016	YES	Not Available	Oral Tongue	TCGA-CN-5367	61d0709c-d148-413b-a7b5-c0c82ed2f32f	4	-22246	352	0		Not Available	TCGA-CN-5367-D11126	2fc23b54-6d79-4aa8-b736-3fcf97c884ca	Not Available	4	139	88	CISPLATIN	Not Available	5	Not Available	Not Available	mg	ADJUVANT	Not Applicable	1	IV	NO	Chemotherapy	Not Available	Not Available	mg	Not Available	2011	Not Available	NOT HISPANIC OR LATINO	Not Available	Not Available	Not Available
TCGA-CN-5369-01A-01R-1436-07	Tumor	TCGA-CN-5369	54.89.0	Nationwide Children's Hospital	22	HNSC	8FC711C4-B72D-42B2-BE70-F000813A85D3	12	TCGA	2016	NO	Not Available	Hard Palate	TCGA-CN-5369	b98867d7-7d5a-4c58-8878-37bee6f2f4fa	4	-32871	1	0		Not Available																								Not Available	NOT HISPANIC OR LATINO	Not Available	Not Available	Not Available
TCGA-CN-5370-01A-01R-2016-07	Tumor	TCGA-CN-5370	164.84.0	Nationwide Children's Hospital	22	HNSC	4BDADAD0-4E27-43FF-8A4D-F10A1368808E	12	TCGA	2016	YES	Not Available	Oral Tongue	TCGA-CN-5370	54dab158-eb39-4334-8b5a-bf290e6b8bb1	11	-28549	259	0		Not Available	TCGA-CN-5370-D20384;TCGA-CN-5370-D20385;TCGA-CN-5370-D20386	b6f5aa20-1b2c-4c5c-86fe-a94da873ec8c;46c0a0fa-6a2f-4e82-ba51-afcd0b310a13;118f2653-b67f-4da4-a82e-adc34a93f976	Not Available;Not Available;Not Available	11;11;11	183;183;183	142;142;142	cisplatin;cisplatin;cisplatin	Not Available;Not Available;Not Available	1;1;1	3;3;3	Not Available;Not Available;Not Available	mg/mL;mg/mL;mg/mL	RECURRENCE;RECURRENCE;RECURRENCE	Not Applicable;Not Applicable;Not Applicable	1;2;3	IV;IV;IV	NO;NO;NO	Chemotherapy;Chemotherapy;Chemotherapy	Not Available;Not Available;Not Available	Not Available;Not Available;Not Available	mg/mL;mg/mL;mg/mL	Not Available;Not Available;Not Available	2012;2012;2012	Not Available	NOT HISPANIC OR LATINO	YES	YES	NO
TCGA-CN-5373-01A-01R-1436-07	Tumor	TCGA-CN-5373	54.89.0	Nationwide Children's Hospital	22	HNSC	8E0BFCB1-E333-4545-BE31-26734FC4EF37	12	TCGA	2016	YES	Not Available	Floor of mouth	TCGA-CN-5373	546f01d5-aed5-4fb8-91c0-0fd5e0fde935	4	-20143		0	413	Not Available																								Amplified	NOT HISPANIC OR LATINO	Not Available	Not Available	Not Available
TCGA-CN-5374-01A-01R-1436-07	Tumor	TCGA-CN-5374	54.89.0	Nationwide Children's Hospital	22	HNSC	31B918BF-3377-4355-A0DC-10F228B826C2	12	TCGA	2016	Not Available	Not Available	Tonsil	TCGA-CN-5374	d7641ca1-a062-4dd2-9414-447af7311a84	3	-20464		0	290	Not Available	TCGA-CN-5374-D11053	fdd2aa57-1849-4154-baa7-6fd8077d2354	Not Available	3	182	112	CISPLATIN	Not Available	5	Not Available	Not Available	mg	ADJUVANT	Not Applicable	1	Intravesical	NO	Chemotherapy	Not Available	Not Available	mg	Not Available	2011	Not Available	NOT HISPANIC OR LATINO	Not Available	Not Available	Not Available
TCGA-CN-6010-01A-11R-1686-07	Tumor	TCGA-CN-6010	107.82.0	Nationwide Children's Hospital	22	HNSC	427C6FD8-7FDF-40D0-A624-F4946468D83D	12	TCGA	2016	YES	4	Larynx	TCGA-CN-6010	af31bf2c-8523-4376-bfa8-e2845848d651	13	-19475		0	207	Not Available	TCGA-CN-6010-D12909	0380fd4a-b2f7-4719-8902-3ee482837607	Not Available	13	70	50	cisplatin	Not Available	6	2	10	mg/mL	ADJUVANT	Not Applicable	1	IV	NO	Chemotherapy	Not Available	10	mg/mL	Not Available	2011	Amplified	NOT HISPANIC OR LATINO	Not Available;Not Available	Not Available;Not Available	Not Available;Not Available
TCGA-CN-6011-01A-11R-1686-07	Tumor	TCGA-CN-6011	107.82.0	Nationwide Children's Hospital	22	HNSC	BBF663AD-C3E0-46E0-83D9-4EE7777501D4	12	TCGA	2016	YES	Not Available	Alveolar Ridge	TCGA-CN-6011	e7d49212-e9cb-4cd7-923a-bdfc82a4a150	14	-21016		0	228	Not Available	TCGA-CN-6011-D12915	cff99d0d-77d9-4d0e-87f8-6b1bfad911f4	Not Available	14	159	109	cisplatin	Not Available	6	Not Available	Not Available	mg/mL	ADJUVANT	Not Applicable	1	IV	NO	Chemotherapy	Not Available	Not Available	mg/mL	Not Available	2011	Not Available	NOT HISPANIC OR LATINO	Not Available;Not Available	Not Available;Not Available	Not Available;Not Available
TCGA-CN-6012-01A-11R-1686-07	Tumor	TCGA-CN-6012	107.82.0	Nationwide Children's Hospital	22	HNSC	0B39B6CC-B431-4DA7-A5C4-36495C8AC81F	12	TCGA	2016	NO	Not Available	Larynx	TCGA-CN-6012	9023c9bf-02a0-4396-8161-304089957b62	14	-24286		0	144	Not Available	TCGA-CN-6012-D12918	2aee6c64-62c9-42d9-9395-9d272e94866e	Not Available	14	200	157	cisplatin	Not Available	6	Not Available	Not Available	mg/mL	ADJUVANT	Not Applicable	1	IV	NO	Chemotherapy	Not Available	Not Available	mg/mL	Not Available	2011	Unamplified	NOT HISPANIC OR LATINO	Not Available;Not Available	Not Available;Not Available	Not Available;Not Available
TCGA-CN-6013-01A-11R-1686-07	Tumor	TCGA-CN-6013	107.82.0	Nationwide Children's Hospital	22	HNSC	7120BB97-8144-4026-8594-D1B1FC34C05A	12	TCGA	2016	YES	Not Available	Alveolar Ridge	TCGA-CN-6013	714496c5-d221-4397-9c5a-cd2d22603e6f	14	-20703		0	155	Not Available	TCGA-CN-6013-D12921	c1510e5b-75e6-4df8-885b-58839450817b	Not Available	14	148	103	cisplatin	Not Available	6	3	100	mg/m2	ADJUVANT	Not Applicable	1	IV	NO	Chemotherapy	Not Available	100	mg/m2	Not Available	2011	Unamplified	NOT HISPANIC OR LATINO	YES	NO	Not Available
TCGA-CN-6016-01A-11R-1686-07	Tumor	TCGA-CN-6016	107.82.0	Nationwide Children's Hospital	22	HNSC	17C15F4C-0818-4D91-B299-1A2F94CBE05B	12	TCGA	2016	YES	12	Floor of mouth	TCGA-CN-6016	ffcf851d-7fa1-4b45-911a-a3fbd74c253a	14	-23664		0	202	Not Available	TCGA-CN-6016-D12925	5f3c849a-2223-4b0e-a956-302e6eb6281e	Not Available	14	141	92	carboplatin	Not Available	6	Not Available	2	AUC	ADJUVANT	Not Applicable	1	IV	NO	Chemotherapy	Not Available	2	AUC	Not Available	2011	Unamplified	NOT HISPANIC OR LATINO	Not Available;Not Available	Not Available;Not Available	Not Available;Not Available
TCGA-CN-6017-01A-11R-1686-07	Tumor	TCGA-CN-6017	107.82.0	Nationwide Children's Hospital	22	HNSC	B57E61AA-A0A2-4BBB-8B4E-27191F48B6F0	12	TCGA	2016	YES	3	Oral Tongue	TCGA-CN-6017	23c4e2eb-142b-4fcc-a974-9a248aec3f37	14	-20358		0	160	Not Available	TCGA-CN-6017-D12931;TCGA-CN-6017-D12930	c940082c-1adc-4531-96a4-77ed6d02dd7c;7c63d1bb-992a-477d-94eb-c24c54de186e	Not Available;Not Available	14;14	110;96	103;75	carboplatin;cisplatin	Not Available;Not Available	6;6	Not Available;Not Available	50;10	mg/mL;mg/mL	ADJUVANT;ADJUVANT	Not Applicable;Not Applicable	1;1	IV;IV	NO;NO	Chemotherapy;Chemotherapy	Not Available;Not Available	50;10	mg/mL;mg/mL	Not Available;Not Available	2011;2011	Unamplified	NOT HISPANIC OR LATINO	Not Available;Not Available	Not Available;Not Available	Not Available;Not Available
TCGA-CN-6018-01A-11R-1686-07	Tumor	TCGA-CN-6018	107.82.0	Nationwide Children's Hospital	22	HNSC	92AF847C-BA21-4978-9E77-EABDD71278C8	12	TCGA	2016	NO	Not Available	Oral Cavity	TCGA-CN-6018	55838e1f-07e8-49ca-89d6-46216babc6f7	14	-31242		0	45	Not Available																								Not Available	NOT HISPANIC OR LATINO	Not Available	Not Available	Not Available
TCGA-CN-6019-01A-11R-1686-07	Tumor	TCGA-CN-6019	107.82.0	Nationwide Children's Hospital	22	HNSC	9BFD4381-423F-492F-A483-50C79E9E8B76	12	TCGA	2016	YES	3	Oral Tongue	TCGA-CN-6019	ee3061ec-273c-4bef-a325-35e9c469bf01	15	-22485		0	135	Not Available	TCGA-CN-6019-D12971;TCGA-CN-6019-D12972	53514e53-df2d-4df6-9e6c-27c267f00251;8efcdd24-e738-485b-943b-583e784c212d	Not Available;Not Available	15;15	84;91	56;56	cisplatin;vectibix	Not Available;Not Available	6;6	Not Available;Not Available	10;20	mg/mL;mg/mL	ADJUVANT;ADJUVANT	Not Applicable;Not Applicable	1;1	IV;IV	NO;NO	Chemotherapy;Chemotherapy	Not Available;Not Available	10;20	mg/mL;mg/mL	Not Available;Not Available	2011;2011	Unamplified	NOT HISPANIC OR LATINO	Not Available;Not Available	Not Available;Not Available	Not Available;Not Available
TCGA-CN-6020-01A-11R-1686-07	Tumor	TCGA-CN-6020	107.82.0	Nationwide Children's Hospital	22	HNSC	366DB768-F116-48FD-9A19-05CBD7F4517E	12	TCGA	2016	YES	Not Available	Oral Cavity	TCGA-CN-6020	9283709d-d019-4291-a097-611a5c05244b	15	-21232		0	98	98																								Amplified	NOT HISPANIC OR LATINO	Not Available	Not Available	Not Available
TCGA-CN-6021-01A-11R-1686-07	Tumor	TCGA-CN-6021	107.82.0	Nationwide Children's Hospital	22	HNSC	3F5E9223-6DEB-4DB9-83E6-4AE0D082BD3D	12	TCGA	2016	NO	Not Available	Larynx	TCGA-CN-6021	9eb1997f-14f5-4230-ae4f-1ef1943e1723	14	-23212	276	0		Not Available																								Not Available	NOT HISPANIC OR LATINO	Not Available	Not Available	Not Available
TCGA-CN-6022-01A-21R-1686-07	Tumor	TCGA-CN-6022	107.82.0	Nationwide Children's Hospital	22	HNSC	66002AA0-2861-4A99-8392-544133A5A876	12	TCGA	2016	Not Available	Not Available	Larynx	TCGA-CN-6022	339f80f9-a542-4aaa-8bb8-3784493dd5ab	14	-17971		0	202	Not Available																								Unamplified	NOT HISPANIC OR LATINO	NO;Not Available	YES;Not Available	YES;Not Available
TCGA-CN-6023-01A-11R-1686-07	Tumor	TCGA-CN-6023	107.82.0	Nationwide Children's Hospital	22	HNSC	429654F5-5EFF-49BC-8EA2-CE08F879988B	12	TCGA	2016	YES	Not Available	Larynx	TCGA-CN-6023	69efde94-a9f9-49ff-9c82-028c35940eda	15	-26769		0	188	Not Available	TCGA-CN-6023-D12963	1340343d-7b35-4956-869b-977df089d4d7	Not Available	15	99	49	erbitux	Not Available	6	Not Available	Not Available	mg/mL	ADJUVANT	Not Applicable	1	IV	NO	Chemotherapy	Not Available	Not Available	mg/mL	Not Available	2011	Unamplified	NOT HISPANIC OR LATINO	Not Available;Not Available	Not Available;Not Available	Not Available;Not Available
TCGA-CN-6024-01A-11R-1686-07	Tumor	TCGA-CN-6024	107.82.0	Nationwide Children's Hospital	22	HNSC	C3010A48-6244-4CA9-9516-A6865C819133	12	TCGA	2016	YES	Not Available	Oral Tongue	TCGA-CN-6024	2fc48edb-a428-49c3-9599-d00eb2b448ac	15	-24259		0	224	Not Available																								Not Available	NOT HISPANIC OR LATINO	Not Available;Not Available	Not Available;Not Available	NO;Not Available
TCGA-CN-6988-01A-11R-1915-07	Tumor	TCGA-CN-6988	151.75.0	Nationwide Children's Hospital	22	HNSC	C05B7CF1-9E98-4EAC-841E-39DBFCAB27BA	12	TCGA	2016	YES	6	Larynx	TCGA-CN-6988	426a24aa-82c3-42a4-90df-4837871ee286	17	-17308		0	43	Not Available																								Unamplified	NOT HISPANIC OR LATINO	Not Available	Not Available	Not Available
TCGA-CN-6989-01A-11R-1915-07	Tumor	TCGA-CN-6989	151.75.0	Nationwide Children's Hospital	22	HNSC	2056701D-2D85-4C4F-9F4D-18FEC232AA62	12	TCGA	2016	YES	3	Larynx	TCGA-CN-6989	f33aa93f-b32d-4c4f-9a71-1e5ab69c6899	17	-23515		0	178	Not Available	TCGA-CN-6989-D15308;TCGA-CN-6989-D69735;TCGA-CN-6989-D69737	57bb7a6a-4eeb-4d4e-8a88-730d769c7b00;7BCBBA95-799A-442F-BFFA-CD83EEE406DF;79273609-8760-4E9F-9DA7-9B24C8E37E3C	Not Available;Not Available;Not Available	17;16;16	114;855;917	73;791;889	CARBOPLATIN;gemcitabine;methotrexate	Not Available;Clinical Progressive Disease;Clinical Progressive Disease	8;1;1	4;Not Available;Not Available	50;Not Available;Not Available	mg/mL;Not Available;Not Available	ADJUVANT;Not Available;Not Available	Not Applicable;Not Applicable;Not Applicable	1;Not Available;Not Available	IV;Not Available;Not Available	NO;NO;NO	Chemotherapy;Chemotherapy;Chemotherapy	Not Available;Not Available;Not Available	200;Not Available;Not Available	mg/mL;Not Available;Not Available	Not Available;NO;NO	2011;2015;2015	Unamplified	NOT HISPANIC OR LATINO	Not Available;NO	Not Available;NO	Not Available;YES
TCGA-CN-6992-01A-11R-1915-07	Tumor	TCGA-CN-6992	151.75.0	Nationwide Children's Hospital	22	HNSC	081D5F26-BEB7-498A-844C-AF0B621FFA16	12	TCGA	2016	YES	16	Larynx	TCGA-CN-6992	547de7d8-c2f1-41d7-a0b4-cc6f39712301	17	-22598		0	83	Not Available	TCGA-CN-6992-D15405	e401c4ae-9e4a-4b3d-bcd9-f2a87a01dca0	Not Available	22	Not Available	71	CISPLATIN	Not Available	8	3	10	mg/mL	ADJUVANT	Not Applicable	1	IV	YES	Chemotherapy	Not Available	30	mg/mL	Not Available	2011	Not Available	NOT HISPANIC OR LATINO	Not Available	Not Available	Not Available
TCGA-CN-6994-01A-11R-1915-07	Tumor	TCGA-CN-6994	151.75.0	Nationwide Children's Hospital	22	HNSC	8BB7775A-9086-42BD-9290-E7412FD649BB	12	TCGA	2016	Not Available	Not Available	Oral Cavity	TCGA-CN-6994	6909302d-358a-46cd-8052-eedb09c83c83	22	-24778		0	119	Not Available																								Not Available	NOT HISPANIC OR LATINO	Not Available	Not Available	Not Available
TCGA-CN-6995-01A-31R-2016-07	Tumor	TCGA-CN-6995	164.84.0	Nationwide Children's Hospital	22	HNSC	BF7016E7-4F5C-48D1-ABF5-8D5C3BFF562F	12	TCGA	2016	NO	Not Available	Floor of mouth	TCGA-CN-6995	396ccdcb-40eb-4299-8575-b26753054434	29	-28850	112	0		Not Available																								Not Available	NOT HISPANIC OR LATINO
TCGA-CN-6996-01A-11R-1915-07	Tumor	TCGA-CN-6996	151.75.0	Nationwide Children's Hospital	22	HNSC	092286AC-D759-4BA2-B758-0037A8D700BF	12	TCGA	2016	NO	Not Available	Oral Tongue	TCGA-CN-6996	49b94421-fe82-4f24-8ef2-820674142418	22	-21447		0	114	Not Available	TCGA-CN-6996-D15416;TCGA-CN-6996-D33162;TCGA-CN-6996-D33163;TCGA-CN-6996-D33164	2cdc1e4c-68c4-4cd6-a393-4cd8ef3a5286;0BE502FB-1A48-4A91-B05E-929D2A583681;0027A614-EB04-4DFF-A532-A08EB2C575ED;24E63BC8-0948-4145-B53A-713C42A33A16	Not Available;Not Available;Not Available;Not Available	22;22;22;22	Not Available;378;378;Not Available	70;378;378;418	CISPLATIN;xeloda;Vorinostat;HSC vaccine injection	Not Available;Clinical Progressive Disease;Clinical Progressive Disease;Clinical Progressive Disease	8;6;6;6	3;Not Available;Not Available;Not Available	10;Not Available;Not Available;Not Available	mg/mL;Not Available;Not Available;Not Available	ADJUVANT;Not Available;Not Available;Not Available	Not Applicable;Not Applicable;Not Applicable;Not Applicable	1;Not Available;Not Available;Not Available	IV;Not Available;Not Available;Not Available	YES;NO;NO;YES	Chemotherapy;Targeted Molecular therapy;Targeted Molecular therapy;Vaccine	Not Available;Not Available;Not Available;Not Available	30;Not Available;Not Available;Not Available	mg/mL;Not Available;Not Available;Not Available	Not Available;YES;YES;YES	2011;2012;2012;2012	Not Available	NOT HISPANIC OR LATINO	Not Available;YES	Not Available;NO	Not Available;NO
TCGA-CN-6997-01A-11R-2016-07	Tumor	TCGA-CN-6997	164.84.0	Nationwide Children's Hospital	22	HNSC	F64823DA-540B-46BC-8284-9DDBF22C36DE	12	TCGA	2016	NO	Not Available	Larynx	TCGA-CN-6997	171890ae-0391-4d8c-9bd2-090d866a2c5b	22	-24298		0	100	Not Available	TCGA-CN-6997-D15470;TCGA-CN-6997-D33166	215bd2b3-caa7-4dcb-b46d-f8a11e93a661;256F059A-84A0-495D-8E52-606718D2CBBA	Not Available;Not Available	22;22	101;Not Available	59;363	cisplatin;erbitux	Not Available;Not Applicable	8;6	3;Not Available	Not Available;Not Available	mg/mL;Not Available	ADJUVANT;Not Available	Not Applicable;Not Applicable	1;Not Available	IV;Not Available	NO;YES	Chemotherapy;Chemotherapy	Not Available;Not Available	Not Available;Not Available	mg/mL;Not Available	Not Available;NO	2011;2012	Amplified	NOT HISPANIC OR LATINO	Not Available;YES	Not Available;NO	Not Available;Not Available
TCGA-CN-6998-01A-23R-2016-07	Tumor	TCGA-CN-6998	164.84.0	Nationwide Children's Hospital	22	HNSC	601232D2-95A6-41A9-8AC0-B4950ABF81CA	12	TCGA	2016	NO	Not Available	Oral Tongue	TCGA-CN-6998	039788ec-1364-40c7-9e9d-13dc305674e9	24	-19447		0	46	Not Available	TCGA-CN-6998-D33173	4B4A9843-9FB8-48D0-BE16-CD314DE5D251	Not Available	22	131	64	cisplatin	Clinical Progressive Disease	6	Not Available	Not Available	Not Available	Not Available	Not Applicable	Not Available	Not Available	NO	Chemotherapy	Not Available	Not Available	Not Available	NO	2012	Amplified	NOT HISPANIC OR LATINO	Not Available;NO	Not Available;NO	Not Available;YES
TCGA-CN-A497-01A-11R-A24H-07	Tumor	TCGA-CN-A497	260.56.0	Nationwide Children's Hospital	22	HNSC	D604561B-02BE-4E43-8FA1-750226C87156	12	TCGA	2016	NO	Not Available	Larynx	TCGA-CN-A497	76214B90-C323-4FDC-92F4-1180ABDB1380	3	-23310		0	490	Not Available																								Unamplified	NOT HISPANIC OR LATINO
TCGA-CN-A498-01A-11R-A24H-07	Tumor	TCGA-CN-A498	260.56.0	Nationwide Children's Hospital	22	HNSC	D3574433-48B0-40CE-B0C6-017D4C2CB389	12	TCGA	2016	NO	Not Available	Base of tongue	TCGA-CN-A498	34AAD752-D78F-440B-ABD2-F9F939C82664	3	-22330		0	443	Not Available	TCGA-CN-A498-D37342;TCGA-CN-A498-D61912;TCGA-CN-A498-D61915;TCGA-CN-A498-D61916;TCGA-CN-A498-D61917	8B958690-5FC9-4AFE-9ECE-9F05B8741A8C;79F7F568-96AC-4286-BCC9-CE5ECB8708D7;D130A939-969A-487E-8B57-7CF8BCE46175;60A67D06-0F31-41C7-A60E-3D2B35313513;C5E1363B-CDBF-4358-B624-9AD128BCE5E3	Not Available;Not Available;Not Available;Not Available;Not Available	3;10;10;10;10	101;487;723;751;751	59;480;674;744;744	carboplatin;erbitux;erbitux;carboplatin;taxol	Complete Response;Clinical Progressive Disease;Clinical Progressive Disease;Clinical Progressive Disease;Clinical Progressive Disease	12;7;7;7;7	Not Available;Not Available;Not Available;Not Available;Not Available	Not Available;Not Available;Not Available;Not Available;Not Available	Not Available;Not Available;Not Available;Not Available;Not Available	Not Available;Not Available;Not Available;Not Available;Not Available	Not Applicable;Not Applicable;Not Applicable;Not Applicable;Not Applicable	Not Available;Not Available;Not Available;Not Available;Not Available	Not Available;Not Available;Not Available;Not Available;Not Available	NO;NO;NO;NO;NO	Chemotherapy;Chemotherapy;Chemotherapy;Chemotherapy;Chemotherapy	Not Available;Not Available;Not Available;Not Available;Not Available	Not Available;Not Available;Not Available;Not Available;Not Available	Not Available;Not Available;Not Available;Not Available;Not Available	NO;NO;NO;NO;NO	2012;2014;2014;2014;2014	Not Available	NOT HISPANIC OR LATINO
TCGA-CN-A499-01A-11R-A24H-07	Tumor	TCGA-CN-A499	260.56.0	Nationwide Children's Hospital	22	HNSC	4DD286E5-377A-4A16-A851-8F22459853B6	12	TCGA	2016	YES	0	Tonsil	TCGA-CN-A499	A3D89882-6D5B-497A-A9E4-A8B8908C3FF4	3	-21971		0	388	Not Available																								Not Evaluated	NOT HISPANIC OR LATINO
TCGA-CN-A49A-01A-11R-A24H-07	Tumor	TCGA-CN-A49A	260.56.0	Nationwide Children's Hospital	22	HNSC	6C50E72B-1974-4148-90A9-6F7A3723717A	12	TCGA	2016	YES	0	Alveolar Ridge	TCGA-CN-A49A	5FE17DDE-EF75-49A2-90F8-0647077B6CA5	3	-21995		0	391	Not Available	TCGA-CN-A49A-D37354	C4008AB6-6D23-45C5-983B-3FEC893E9710	Not Available	3	126	76	carboplatin	Complete Response	12	Not Available	Not Available	Not Available	Not Available	Not Applicable	Not Available	Not Available	NO	Chemotherapy	Not Available	Not Available	Not Available	NO	2012	Not Evaluated	NOT HISPANIC OR LATINO
TCGA-CN-A49B-01A-31R-A24H-07	Tumor	TCGA-CN-A49B	260.56.0	Nationwide Children's Hospital	22	HNSC	C99E12D8-D0F3-4BF0-8EE1-A9C026E20247	12	TCGA	2016	YES	7	Larynx	TCGA-CN-A49B	6F02648B-0C48-46EA-874A-407F951F0409	3	-26155		0	447	Not Available																								Not Evaluated	NOT HISPANIC OR LATINO
TCGA-CN-A49C-01A-11R-A24H-07	Tumor	TCGA-CN-A49C	260.56.0	Nationwide Children's Hospital	22	HNSC	224A3345-FE86-41D5-9EDA-7700D6D61DA5	12	TCGA	2016	NO	Not Available	Tonsil	TCGA-CN-A49C	B39D2880-6964-4C5B-B5A9-AB64E5CB31E8	3	-24495		0	190	Not Available	TCGA-CN-A49C-D37365	A2AD03BA-6A36-4964-A14E-6D6A3739CE96	Not Available	3	78	26	erbitux	Complete Response	12	Not Available	Not Available	Not Available	Not Available	Not Applicable	Not Available	Not Available	NO	Chemotherapy	Not Available	Not Available	Not Available	NO	2012	Not Evaluated	NOT HISPANIC OR LATINO
TCGA-CN-A63T-01A-11R-A28V-07	Tumor	TCGA-CN-A63T	301.57.0	Nationwide Children's Hospital	22	HNSC	1F40EA83-42CE-4E09-A06D-244AFF175FDE	12	TCGA	2016	YES	1.7	Larynx	TCGA-CN-A63T	A3F98E70-7050-46CF-A679-CA7A83F4442F	17	-22201		0	225	Not Available	TCGA-CN-A63T-D44206	5D84D47F-741E-44AF-928F-BD8F153359E1	Not Available	17	64	64	CISPLATIN	Complete Response	6	Not Available	Not Available	Not Available	Not Available	Not Applicable	Not Available	Not Available	NO	Chemotherapy	Not Available	Not Available	Not Available	NO	2013	Not Evaluated	NOT HISPANIC OR LATINO
TCGA-CN-A63U-01A-11R-A30B-07	Tumor	TCGA-CN-A63U	311.57.0	Nationwide Children's Hospital	22	HNSC	4AE3DAC5-05CD-4F81-BB87-D0A9DAE5E52A	12	TCGA	2016	NO	Not Available	Larynx	TCGA-CN-A63U	22233A31-023F-412F-9B42-73B58C51DEE8	17	-18272		0	526	Not Available																								Not Evaluated	NOT HISPANIC OR LATINO
TCGA-CN-A63V-01A-11R-A466-07	Tumor	TCGA-CN-A63V	301.57.0	Nationwide Children's Hospital	22	HNSC	11725E76-5063-4426-A919-993F328CDFDD	12	TCGA	2016	NO	Not Available	Buccal Mucosa	TCGA-CN-A63V	B8307F59-713F-404C-9A82-2450D2AD7507	17	-21734		0	484	Not Available																								Not Evaluated	NOT HISPANIC OR LATINO
TCGA-CN-A63W-01A-11R-A30B-07	Tumor	TCGA-CN-A63W	311.57.0	Nationwide Children's Hospital	22	HNSC	A011037D-F31F-4958-AEAE-5DFDC9D7E7F9	12	TCGA	2016	YES	0	Larynx	TCGA-CN-A63W	5D5DEFB3-8572-467D-B383-7358F802B398	17	-17693		0	348	Not Available	TCGA-CN-A63W-D44212;TCGA-CN-A63W-D44213;TCGA-CN-A63W-D44214	62901677-998E-4F33-A650-916BE200F0C7;57F1F312-FBF1-4BEF-AEE0-FE5862A7388B;EB206B69-FC69-41FF-9047-C3C45209F28D	Not Available;Not Available;Not Available	17;17;17	138;138;138	69;69;69	VECTIBIX;cisplatin;carboplatin	Complete Response;Complete Response;Complete Response	6;6;6	Not Available;Not Available;Not Available	Not Available;Not Available;Not Available	Not Available;Not Available;Not Available	Not Available;Not Available;Not Available	Not Applicable;Not Applicable;Not Applicable	Not Available;Not Available;Not Available	Not Available;Not Available;Not Available	NO;NO;NO	Chemotherapy;Chemotherapy;Chemotherapy	Not Available;Not Available;Not Available	Not Available;Not Available;Not Available	Not Available;Not Available;Not Available	YES;YES;YES	2013;2013;2013	Not Evaluated	NOT HISPANIC OR LATINO
TCGA-CN-A641-01A-11R-A30B-07	Tumor	TCGA-CN-A641	311.57.0	Nationwide Children's Hospital	22	HNSC	D804057D-5BAE-44F6-A66D-0D3E8133BF0F	12	TCGA	2016	YES	0	Larynx	TCGA-CN-A641	600D5316-B795-4AB2-86FC-52835059386F	17	-17454		0	367	Not Available	TCGA-CN-A641-D44226	FF077EB0-9EF5-4000-8170-C36DBCE43733	Not Available	17	239	187	cisplatin	Complete Response	6	Not Available	Not Available	Not Available	Not Available	Not Applicable	Not Available	Not Available	NO	Chemotherapy	Not Available	Not Available	Not Available	NO	2013	Not Evaluated	NOT HISPANIC OR LATINO
TCGA-CN-A642-01A-12R-A30B-07	Tumor	TCGA-CN-A642	311.57.0	Nationwide Children's Hospital	22	HNSC	737C4BBB-A655-454D-92E1-0578CDFA23FA	12	TCGA	2016	YES	0	Floor of mouth	TCGA-CN-A642	A1DED1E8-EB28-49DD-8F3D-1CE8F40EED8F	17	-21011	82	0		Not Available																								Not Evaluated	NOT HISPANIC OR LATINO
TCGA-CN-A6UY-01A-12R-A34R-07	Tumor	TCGA-CN-A6UY	355.48.0	Nationwide Children's Hospital	22	HNSC	63B06A06-EC4C-4BB2-A401-31A02D95D318	12	TCGA	2016	NO	Not Available	Base of tongue	TCGA-CN-A6UY	602F2512-00B6-44B6-9ED6-F8B010224F8C	27	-20967		0	307	Not Available	TCGA-CN-A6UY-D52026	BB2A54D2-09B6-4368-9778-D94FE222F2D2	Not Available	27	106	59	carboplatin	Complete Response	11	Not Available	Not Available	Not Available	Not Available	Not Applicable	Not Available	Not Available	NO	Chemotherapy	Not Available	Not Available	Not Available	NO	2013	Not Evaluated	NOT HISPANIC OR LATINO
TCGA-CN-A6V3-01A-12R-A34R-07	Tumor	TCGA-CN-A6V3	355.48.0	Nationwide Children's Hospital	22	HNSC	293A5545-D844-4E50-84B7-44AC28AF4DAD	12	TCGA	2016	YES	12	Larynx	TCGA-CN-A6V3	896E37FA-3A6A-481B-B790-5EE62BBDC9FA	2	-22397		0	298	Not Available	TCGA-CN-A6V3-D52271	19331F82-7748-4F8C-B0A3-9324E970BD23	Not Available	2	151	130	cisplatin	Complete Response	12	Not Available	Not Available	Not Available	Not Available	Not Applicable	Not Available	Not Available	NO	Chemotherapy	Not Available	Not Available	Not Available	NO	2013	Not Available	NOT HISPANIC OR LATINO
TCGA-CN-A6V6-01A-12R-A34R-07	Tumor	TCGA-CN-A6V6	355.48.0	Nationwide Children's Hospital	22	HNSC	D8BD3DB2-6693-4F0A-AA64-7D17D5F74C8B	12	TCGA	2016	YES	12	Base of tongue	TCGA-CN-A6V6	5AC57AEE-4BE1-4A29-A53F-343F5A3D2E86	2	-21811		0	234	Not Available	TCGA-CN-A6V6-D52321	1001ED02-4CE0-4DE5-AF67-E3029ACB9F10	Not Available	2	116	74	cisplatin	Complete Response	12	Not Available	Not Available	Not Available	Not Available	Not Applicable	Not Available	Not Available	NO	Chemotherapy	Not Available	Not Available	Not Available	NO	2013	Not Available	NOT HISPANIC OR LATINO
TCGA-CN-A6V7-01A-12R-A34R-07	Tumor	TCGA-CN-A6V7	355.48.0	Nationwide Children's Hospital	22	HNSC	FDDB14E2-AE26-4306-9626-221F6E6525F7	12	TCGA	2016	NO	Not Available	Tonsil	TCGA-CN-A6V7	67560840-70FB-45FD-8572-648F74811AEC	2	-14895		0	188	Not Available	TCGA-CN-A6V7-D52379	F812718C-07AE-4CDB-A5EF-25A900F6F65C	Not Available	3	104	83	cisplatin	Complete Response	12	Not Available	Not Available	Not Available	Not Available	Not Applicable	Not Available	Not Available	NO	Chemotherapy	Not Available	Not Available	Not Available	NO	2013	Not Available	NOT HISPANIC OR LATINO
TCGA-CQ-5323-01A-01R-1686-07	Tumor	TCGA-CQ-5323	107.82.0	Nationwide Children's Hospital	22	HNSC	F6E84B54-1386-4F23-96A9-78040E980DFE	12	TCGA	2016	YES	1	Alveolar Ridge	TCGA-CQ-5323	deefdd62-4d35-40c9-ad4c-0b593f35cff7	30	-30173		0	1466	Not Available																								Not Available	NOT HISPANIC OR LATINO	Not Available	Not Available	Not Available
TCGA-CQ-5324-01A-01R-1686-07	Tumor	TCGA-CQ-5324	107.82.0	Nationwide Children's Hospital	22	HNSC	37E5327C-E7D3-410B-A89C-227106F88437	12	TCGA	2016	NO	Not Available	Floor of mouth	TCGA-CQ-5324	78e67b26-c473-449f-95e7-c4d11f066d5b	5	-21803		0	1207	Not Available																								Not Available	NOT HISPANIC OR LATINO	Not Available	Not Available	Not Available
TCGA-CQ-5325-01A-01R-1686-07	Tumor	TCGA-CQ-5325	107.82.0	Nationwide Children's Hospital	22	HNSC	72D869F6-D84C-4F80-9484-835735EBA001	12	TCGA	2016	YES	3	Oral Tongue	TCGA-CQ-5325	408c5d54-7888-4955-8386-bf8819b48a6c	5	-23833	654	0		Not Available																								Not Available	NOT HISPANIC OR LATINO	NO;Not Available	YES;Not Available	NO;Not Available
TCGA-CQ-5326-01A-01R-1873-07	Tumor	TCGA-CQ-5326	145.84.0	Nationwide Children's Hospital	22	HNSC	09A0DC13-5D00-4685-8E99-06869AA7E2F4	12	TCGA	2016	YES	2	Alveolar Ridge	TCGA-CQ-5326	dff4246a-57ea-46f2-a5bc-7aa82e494137	26	-24473	89	0		Not Available																								Not Available	NOT HISPANIC OR LATINO	Not Available	Not Available	Not Available
TCGA-CQ-5327-01A-01R-1686-07	Tumor	TCGA-CQ-5327	107.82.0	Nationwide Children's Hospital	22	HNSC	87868203-0333-4C4D-93BC-BF8EA57CFBF0	12	TCGA	2016	NO	Not Available	Oral Tongue	TCGA-CQ-5327	5a03e2b6-4c8b-479a-9036-9859af031da4	7	-22307		0	1184	1184	TCGA-CQ-5327-D10928	087fb3b8-4696-47fe-9e79-b7f83d404fb4	Not Available	5	57	57	cisplatin	Not Available	4	1	150	mg	ADJUVANT	Not Applicable	1	IV	NO	Chemotherapy	Not Available	150	mg	Not Available	2011	Not Available	NOT HISPANIC OR LATINO	Not Available	Not Available	Not Available
TCGA-CQ-5329-01A-01R-1686-07	Tumor	TCGA-CQ-5329	107.82.0	Nationwide Children's Hospital	22	HNSC	D178C8EE-97E0-43B1-B629-BCA5E553B286	12	TCGA	2016	NO	Not Available	Oral Tongue	TCGA-CQ-5329	02dcc11f-4f0e-4c9e-8d96-d22d47beef5d	12	-17028		0	841	Not Available																								Not Available	NOT HISPANIC OR LATINO	Not Available	Not Available	Not Available
TCGA-CQ-5330-01A-01R-1686-07	Tumor	TCGA-CQ-5330	107.82.0	Nationwide Children's Hospital	22	HNSC	BDC77ACF-88CF-43D2-8650-3F28AF372DCC	12	TCGA	2016	NO	Not Available	Oral Tongue	TCGA-CQ-5330	9ffa79fa-d2d8-48e1-8fd6-4b020ecf357c	12	-25255		0	896	Not Available	TCGA-CQ-5330-D10936	7f2cfbaa-b1a9-48c4-adad-9b46c7f9674b	Not Available	12	88	57	Not Available	Not Available	4	Not Available	Not Available	Not Available	ADJUVANT	Not Applicable	1	IV	NO	Chemotherapy	Not Available	Not Available	Not Available	Not Available	2011	Not Available	NOT HISPANIC OR LATINO	Not Available	Not Available	Not Available
TCGA-CQ-5331-01A-02R-1873-07	Tumor	TCGA-CQ-5331	145.84.0	Nationwide Children's Hospital	22	HNSC	60CDF6B7-77ED-4730-9C5D-ED59BE5D77DE	12	TCGA	2016	NO	Not Available	Hard Palate	TCGA-CQ-5331	dbf4e04d-095e-4554-a48c-fe7cb711ac42	27	-26901		0	1028	Not Available																								Not Available	NOT HISPANIC OR LATINO	Not Available	Not Available	Not Available
TCGA-CQ-5332-01A-01R-1686-07	Tumor	TCGA-CQ-5332	107.82.0	Nationwide Children's Hospital	22	HNSC	3C0ADBC2-F776-4A4D-8878-DF3C227A88BF	12	TCGA	2016	YES	Not Available	Floor of mouth	TCGA-CQ-5332	657346f2-4280-4d80-983e-cab8004f184a	12	-32032	317	0		Not Available																								Not Available	NOT HISPANIC OR LATINO	Not Available	Not Available	Not Available
TCGA-CQ-5333-01A-01R-2403-07	Tumor	TCGA-CQ-5333	241.67.0	Nationwide Children's Hospital	22	HNSC	A22979EE-B884-42B8-8EBC-DE7ECE9D32C6	12	TCGA	2016	YES	Not Available	Oral Tongue	TCGA-CQ-5333	06a802b9-0b5c-4ee4-9823-56d2e8c78422	12	-27110	341	0		Not Available																								Not Available	NOT HISPANIC OR LATINO	NO	YES	NO
TCGA-CQ-5334-01A-01R-1686-07	Tumor	TCGA-CQ-5334	107.82.0	Nationwide Children's Hospital	22	HNSC	26DA2A00-1248-47CB-87B9-937E3462DF31	12	TCGA	2016	NO	Not Available	Buccal Mucosa	TCGA-CQ-5334	1c25aad5-13f5-44dc-a18f-425d7626ce55	12	-32024	129	0		Not Available																								Not Available	NOT HISPANIC OR LATINO	NO	YES	NO
TCGA-CQ-6218-01A-11R-1915-07	Tumor	TCGA-CQ-6218	151.75.0	Nationwide Children's Hospital	22	HNSC	F96CB860-A57A-4ADB-A986-EACDBDF81F2C	12	TCGA	2016	NO	Not Available	Floor of mouth	TCGA-CQ-6218	64260b33-dac0-4442-82c8-04f0c9ea8a01	27	-19096		0	870	Not Available	TCGA-CQ-6218-D18538	8ef7fb03-8ad2-411e-bbea-acd539e4e1a4	Not Available	30	121	90	cisplatin	Not Available	9	2	260	mg	ADJUVANT	Not Applicable	1	IV	NO	Chemotherapy	Not Available	260	mg	Not Available	2011	Not Available	NOT HISPANIC OR LATINO	Not Available	Not Available	Not Available
TCGA-CQ-6219-01A-11R-1915-07	Tumor	TCGA-CQ-6219	151.75.0	Nationwide Children's Hospital	22	HNSC	242122A4-C91C-4ECB-B842-F911F71997F8	12	TCGA	2016	YES	1.7	Oral Tongue	TCGA-CQ-6219	0ca3d25a-22e9-4e40-834b-65f402535005	27	-18578	479	0		Not Available																								Not Available	NOT HISPANIC OR LATINO	NO	YES	NO
TCGA-CQ-6220-01A-11R-1915-07	Tumor	TCGA-CQ-6220	151.75.0	Nationwide Children's Hospital	22	HNSC	39FDAC6D-5E43-4E63-AB2E-AC4277EBE824	12	TCGA	2016	YES	Not Available	Buccal Mucosa	TCGA-CQ-6220	96d0cefe-7949-4736-a7dc-1e4fa94765ec	27	-25366	985	0		Not Available																								Not Available	NOT HISPANIC OR LATINO	Not Available	Not Available	Not Available
TCGA-CQ-6221-01A-11R-2081-07	Tumor	TCGA-CQ-6221	188.78.0	Nationwide Children's Hospital	22	HNSC	4E88DD12-7E40-425D-A0C4-B5DDF7FCFB57	12	TCGA	2016	YES	Not Available	Oral Tongue	TCGA-CQ-6221	839b660c-98fe-4468-a2b3-408594350250	16	-29026		0	1000	Not Available																								Not Available	NOT HISPANIC OR LATINO	Not Available	Not Available	Not Available
TCGA-CQ-6222-01A-11R-1915-07	Tumor	TCGA-CQ-6222	151.75.0	Nationwide Children's Hospital	22	HNSC	6B386AF3-04CA-4D70-B9BA-FDCC500FE4C3	12	TCGA	2016	NO	Not Available	Oral Tongue	TCGA-CQ-6222	e1670628-632d-4305-be07-9b9b6bea3350	3	-23326		0	1160	Not Available	TCGA-CQ-6222-D18547	dbe1e33d-cf3f-49bb-9219-156952973a6e	Not Available	30	178	Not Available	Not Available	Not Available	9	Not Available	Not Available	mg	ADJUVANT	Not Applicable	1	Not Available	NO	Chemotherapy	Not Available	Not Available	Not Available	Not Available	2011	Not Available	NOT HISPANIC OR LATINO	Not Available	Not Available	Not Available
TCGA-CQ-6223-01A-11R-1915-07	Tumor	TCGA-CQ-6223	151.75.0	Nationwide Children's Hospital	22	HNSC	A772E852-0F84-4726-8691-9A8475BDD048	12	TCGA	2016	NO	Not Available	Alveolar Ridge	TCGA-CQ-6223	d9e8c707-e61a-4813-8dc0-2472e9ccf12b	3	-25266		0	1057	Not Available																								Not Available	NOT HISPANIC OR LATINO	Not Available	Not Available	Not Available
TCGA-CQ-6224-01A-11R-1915-07	Tumor	TCGA-CQ-6224	151.75.0	Nationwide Children's Hospital	22	HNSC	04D94F01-16FE-478F-8DF8-F3028054AF7D	12	TCGA	2016	YES	1	Oral Tongue	TCGA-CQ-6224	d86fd392-fa5c-4142-a647-440e6c32d478	5	-19051		0	985	Not Available	TCGA-CQ-6224-D19308	c7de3b5d-5181-48e1-bae6-c600022ea594	Not Available	5	81	61	cisplatin	Not Available	10	2	170	mg	ADJUVANT	Not Applicable	1	IV	NO	Chemotherapy	Not Available	340	mg	Not Available	2011	Not Available	NOT HISPANIC OR LATINO	Not Available	Not Available	Not Available
TCGA-CQ-6225-01A-11R-1915-07	Tumor	TCGA-CQ-6225	151.75.0	Nationwide Children's Hospital	22	HNSC	F1C392A9-0E68-4BAA-9080-0A14271CD54B	12	TCGA	2016	NO	Not Available	Oral Tongue	TCGA-CQ-6225	90f44998-3c05-44b2-9501-bbd0f43c5147	13	-23988	403	0		Not Available																								Not Available	NOT HISPANIC OR LATINO	NO	NO	YES
TCGA-CQ-6227-01A-11R-1915-07	Tumor	TCGA-CQ-6227	151.75.0	Nationwide Children's Hospital	22	HNSC	B427B6C4-3181-4540-AF9E-55ACE8C5C938	12	TCGA	2016	YES	3	Oral Cavity	TCGA-CQ-6227	5d227ea8-bd74-4e8f-9bee-9d981f03d66f	6	-28466	129	0		Not Available																								Not Available	NOT HISPANIC OR LATINO	Not Available	Not Available	Not Available
TCGA-CQ-6228-01A-11R-1915-07	Tumor	TCGA-CQ-6228	151.75.0	Nationwide Children's Hospital	22	HNSC	B80A82F5-1355-42AB-9185-304FDF266FDC	12	TCGA	2016	YES	Not Available	Floor of mouth	TCGA-CQ-6228	e303b8c4-6428-4134-bb9d-a95dc1d8e35e	6	-25942	456	0		Not Available																								Not Available	NOT HISPANIC OR LATINO	NO	YES	Not Available
TCGA-CQ-6229-01A-11R-1915-07	Tumor	TCGA-CQ-6229	151.75.0	Nationwide Children's Hospital	22	HNSC	2FD0CE08-B9DC-4936-A885-3AA5ABFED7BD	12	TCGA	2016	NO	Not Available	Oral Tongue	TCGA-CQ-6229	a091822c-447a-49a5-8c20-e329df79599c	6	-22541		0	815	Not Available																								Not Available	NOT HISPANIC OR LATINO	Not Available	Not Available	Not Available
TCGA-CQ-7063-01A-11R-2403-07	Tumor	TCGA-CQ-7063	241.67.0	Nationwide Children's Hospital	22	HNSC	3AFD2EE7-D2A2-46D9-A62B-E0F9581BFF3F	12	TCGA	2016	YES	0	Hard Palate	TCGA-CQ-7063	2b2bb108-ca85-4b3e-a6a6-5ffaac487c5e	21	-21723		0	1461	Not Available																								Not Evaluated	NOT HISPANIC OR LATINO
TCGA-CQ-7065-01A-11R-2081-07	Tumor	TCGA-CQ-7065	188.78.0	Nationwide Children's Hospital	22	HNSC	74281F9D-66B8-43F0-9436-D8BB928E80C7	12	TCGA	2016	NO	Not Available	Oral Tongue	TCGA-CQ-7065	20ece2ca-8601-4cca-aec5-0a5c0b92594d	27	-14676		0	1007	Not Available	TCGA-CQ-7065-D21031	16cbc814-e531-4d7d-9f43-bbb4ba4123c0	Not Available	27	291	249	cisplatin	Not Available	1	3	197	mg	RECURRENCE	Not Applicable	1	IV	NO	Chemotherapy	Not Available	477	mg	Not Available	2012	Not Available	NOT HISPANIC OR LATINO	YES	YES	NO
TCGA-CQ-7068-01A-11R-2081-07	Tumor	TCGA-CQ-7068	188.78.0	Nationwide Children's Hospital	22	HNSC	467B89BB-2F2D-439E-98F7-4394761BE72C	12	TCGA	2016	NO	Not Available	Floor of mouth	TCGA-CQ-7068	8ebe8c25-5ef9-42d4-9414-8313227b673f	17	-29530		0	693	Not Available																								Not Available	NOT HISPANIC OR LATINO	Not Available	Not Available	Not Available
TCGA-CQ-7069-01A-11R-2403-07	Tumor	TCGA-CQ-7069	241.67.0	Nationwide Children's Hospital	22	HNSC	694784D5-24FA-4C98-A3E9-22F2F8E5C1E2	12	TCGA	2016	YES	0	Alveolar Ridge	TCGA-CQ-7069	06060406-0540-4d5a-adeb-4cc46c01c782	21	-28138		0	901	Not Available																								Not Evaluated	NOT HISPANIC OR LATINO
TCGA-CQ-7071-01A-12R-A30B-07	Tumor	TCGA-CQ-7071	311.57.0	Nationwide Children's Hospital	22	HNSC	A2BDC59C-4EB6-495B-8E20-0699F60D9A57	12	TCGA	2016	YES	0	Oral Cavity	TCGA-CQ-7071	6ecccbf9-bfda-4f5e-9618-3bffaebf4660	13	-27928		0	877	Not Available																								Not Evaluated	NOT HISPANIC OR LATINO
TCGA-CQ-7072-01A-21R-A30B-07	Tumor	TCGA-CQ-7072	311.57.0	Nationwide Children's Hospital	22	HNSC	26515467-66B8-4779-89DA-B550EC3966D2	12	TCGA	2016	YES	12	Floor of mouth	TCGA-CQ-7072	d622bcab-5b5a-45a4-8c02-7bcfdbbb781c	13	-18841		0	1950	Not Available																								Not Evaluated	NOT HISPANIC OR LATINO
TCGA-CQ-A4C6-01A-11R-A24Z-07	Tumor	TCGA-CQ-A4C6	265.56.0	Nationwide Children's Hospital	22	HNSC	BA2DDE1D-7919-44FB-A631-E7D3EE691E6F	12	TCGA	2016	YES	0	Buccal Mucosa	TCGA-CQ-A4C6	5D850E54-24BB-4AE6-9E4B-09ECC7E7CFEE	24	-23205		0	968	Not Available																								Not Evaluated	NOT HISPANIC OR LATINO
TCGA-CQ-A4C7-01A-11R-A24Z-07	Tumor	TCGA-CQ-A4C7	265.56.0	Nationwide Children's Hospital	22	HNSC	8C64861B-5AD8-4391-BE5C-21AA03CD7917	12	TCGA	2016	YES	1	Floor of mouth	TCGA-CQ-A4C7	134223BD-5C03-4854-A034-EBD2C527833E	28	-32194	353	0		Not Available																								Not Evaluated	NOT HISPANIC OR LATINO
TCGA-CQ-A4C9-01A-11R-A24Z-07	Tumor	TCGA-CQ-A4C9	265.56.0	Nationwide Children's Hospital	22	HNSC	47399DC0-6A5F-4074-9D24-755735388ADB	12	TCGA	2016	NO	Not Available	Floor of mouth	TCGA-CQ-A4C9	6A0490EA-D9C6-41CF-BEC3-3257E98CC6ED	28	-20732		0	613	Not Available																								Not Evaluated	Not Evaluated
TCGA-CQ-A4CA-01A-11R-A24Z-07	Tumor	TCGA-CQ-A4CA	265.56.0	Nationwide Children's Hospital	22	HNSC	E8A8324A-E009-4D18-A29D-999B03FA779F	12	TCGA	2016	YES	Not Available	Oral Tongue	TCGA-CQ-A4CA	DF37EED0-EA63-485D-A831-28D3061852BD	28	Not Available		Not Available		Not Available																								Not Evaluated	Not Evaluated
TCGA-CQ-A4CB-01A-11R-A24Z-07	Tumor	TCGA-CQ-A4CB	265.56.0	Nationwide Children's Hospital	22	HNSC	AC8B3B37-2412-4398-A507-3D2426500EF0	12	TCGA	2016	YES	24	Floor of mouth	TCGA-CQ-A4CB	6826ECE7-1834-4367-B05B-FA92A271E179	28	-21574		0	545	Not Available																								Not Evaluated	Not Evaluated
TCGA-CQ-A4CD-01A-21R-A24Z-07	Tumor	TCGA-CQ-A4CD	265.56.0	Nationwide Children's Hospital	22	HNSC	9AB86EAC-DE90-4741-A704-B597D6F2A1B1	12	TCGA	2016	YES	0	Oral Cavity	TCGA-CQ-A4CD	15EB8D88-ADB1-4F4F-A44D-087049DB60CE	28	-25497		0	548	Not Available																								Not Evaluated	NOT HISPANIC OR LATINO
TCGA-CQ-A4CE-01A-11R-A266-07	Tumor	TCGA-CQ-A4CE	273.58.0	Nationwide Children's Hospital	22	HNSC	BD46F089-2371-40F3-86E1-4C51435E3D4B	12	TCGA	2016	YES	0	Oral Tongue	TCGA-CQ-A4CE	E1527704-8A97-445F-A5EE-357920CB28F7	28	-27793		0	393	Not Available																								Not Evaluated	Not Evaluated
TCGA-CQ-A4CG-01A-11R-A266-07	Tumor	TCGA-CQ-A4CG	273.58.0	Nationwide Children's Hospital	22	HNSC	C5691C57-3F90-4351-B03A-13095764A5CC	12	TCGA	2016	YES	0	Buccal Mucosa	TCGA-CQ-A4CG	E7A055D9-8D68-4E6B-BADE-4B2585757210	28	-28637		0	391	Not Available																								Not Evaluated	NOT HISPANIC OR LATINO
TCGA-CQ-A4CH-01A-11R-A266-07	Tumor	TCGA-CQ-A4CH	273.58.0	Nationwide Children's Hospital	22	HNSC	9A5D8F0D-7F20-4DB7-B37B-0AB0F3BF1C57	12	TCGA	2016	YES	0	Oral Tongue	TCGA-CQ-A4CH	AE90972D-5BC2-4B53-B5FF-1B8C31F39342	28	-21455		0	303	Not Available	TCGA-CQ-A4CH-D39504	BFA3063F-BAC1-47D7-B5B8-D95B3CB44D14	Not Available	24	148	120	cisplatin	Partial Response	1	Not Available	Not Available	Not Available	Not Available	Not Applicable	Not Available	Not Available	NO	Chemotherapy	Not Available	Not Available	Not Available	NO	2013	Not Evaluated	NOT HISPANIC OR LATINO
TCGA-CQ-A4CI-01A-11R-A266-07	Tumor	TCGA-CQ-A4CI	273.58.0	Nationwide Children's Hospital	22	HNSC	CB2A544E-FA5C-49AB-88B3-977BBCAE6243	12	TCGA	2016	YES	0	Buccal Mucosa	TCGA-CQ-A4CI	26CB1330-CE48-4006-8155-F6D52D3AB9B6	28	-26664		0	608	Not Available																								Not Evaluated	NOT HISPANIC OR LATINO
TCGA-CR-5243-01A-01R-1514-07	Tumor	TCGA-CR-5243	83.86.0	Nationwide Children's Hospital	22	HNSC	D25FB108-4ED1-41C0-9E5B-3FE2F1E3A71D	12	TCGA	2016	YES	0	Tonsil	TCGA-CR-5243	e37f479f-ca05-45e4-ac6d-a974bed6e7f8	5	-18812		0	2562	Not Available	TCGA-CR-5243-D13861;TCGA-CR-5243-D13862;TCGA-CR-5243-D13181;TCGA-CR-5243-D13859	a51225d1-1529-450f-804b-c19a338c24bc;aff7cceb-3dcf-4550-bd96-de42b88e975e;e2efae3f-9f4b-4c27-92a3-1e2be7112545;cd86c95c-ee26-4743-8196-7da2d926bf5c	Not Available;Not Available;Not Available;Not Available	5;5;5;5	139;139;72;72	91;90;16;16	Paclitaxel;Carboplatin;Paclitaxel;Carboplatin	Not Available;Not Available;Not Available;Not Available	4;4;4;4	7;7;9;9	69;178;138;340	mg;mg;mg;mg	OTHER, SPECIFY IN NOTES;OTHER, SPECIFY IN NOTES;OTHER, SPECIFY IN NOTES;OTHER, SPECIFY IN NOTES	Primary;Primary;Induction;Induction	2;2;1;1	IV;IV;IV;IV	NO;NO;NO;NO	Chemotherapy;Chemotherapy;Chemotherapy;Chemotherapy	Not Available;Not Available;Not Available;Not Available	Not Available;Not Available;Not Available;Not Available	Not Available;Not Available;Not Available;Not Available	Not Available;Not Available;Not Available;Not Available	2011;2011;2011;2011	Not Available	NOT HISPANIC OR LATINO	Not Available	Not Available	Not Available
TCGA-CR-5247-01A-01R-2016-07	Tumor	TCGA-CR-5247	164.84.0	Nationwide Children's Hospital	22	HNSC	8E830501-C377-448B-BDC0-679C8B30AB87	12	TCGA	2016	YES	Not Available	Tonsil	TCGA-CR-5247	692b50fc-19ca-4926-84cb-fd7168209e44	28	-17810		0	358	Not Available	TCGA-CR-5247-D31388;TCGA-CR-5247-D31389	7d7f6836-eb8b-4b3f-99e3-8eeff2599064;a26d314a-0f30-4458-81fa-dd201670068c	Not Available;Not Available	2;2	80;80	19;19	Paclitaxel;Carboplatin	Complete Response;Complete Response	5;5	Not Available;Not Available	Not Available;Not Available	Not Available;Not Available	Not Available;Not Available	Not Applicable;Not Applicable	Not Available;Not Available	Not Available;Not Available	NO;NO	Chemotherapy;Chemotherapy	Not Available;Not Available	Not Available;Not Available	Not Available;Not Available	NO;NO	2012;2012	Not Available	NOT HISPANIC OR LATINO	Not Available	Not Available	Not Available
TCGA-CR-5248-01A-01R-2016-07	Tumor	TCGA-CR-5248	164.84.0	Nationwide Children's Hospital	22	HNSC	87D18246-B541-48E3-A4BB-FF7F1261FE65	12	TCGA	2016	YES	Not Available	Tonsil	TCGA-CR-5248	a9017cd4-df30-46eb-b08f-39540b15243f	28	-19441		0	1663	Not Available	TCGA-CR-5248-D31394;TCGA-CR-5248-D31395;TCGA-CR-5248-D31396;TCGA-CR-5248-D31397;TCGA-CR-5248-D31398;TCGA-CR-5248-D31399;TCGA-CR-5248-D31400;TCGA-CR-5248-D31401	fafb35af-649c-43bc-a1d1-dd6841d9accc;fadf1011-af0a-4a46-8845-014a89f8cb70;932949ae-1676-4692-bbae-c76a444b0da4;be081099-79de-443b-a363-e03eb1e82c60;6cbfc16d-513d-46ca-8d1a-503c1f252f03;8D2D6687-BCF0-4537-B77D-8D5910C34325;5D20FE8A-0C34-41A9-B117-2CEA2634C63D;13733A55-6052-4149-B293-3DF87835CA00	Not Available;Not Available;Not Available;Not Available;Not Available;Not Available;Not Available;Not Available	2;2;2;2;2;2;2;2	84;84;179;179;1152;1152;1152;1208	42;42;137;137;1124;1124;1124;1194	Oxaliplatin;Alimta;Paclitaxel;Carboplatin;Bevacizumab;Docetaxel;Cisplatin;IMC-A12	Unknown;Unknown;Complete Response;Complete Response;Clinical Progressive Disease;Clinical Progressive Disease;Clinical Progressive Disease;Unknown	5;5;5;5;5;5;5;5	Not Available;Not Available;Not Available;Not Available;Not Available;Not Available;Not Available;Not Available	Not Available;Not Available;Not Available;Not Available;Not Available;Not Available;Not Available;Not Available	Not Available;Not Available;Not Available;Not Available;Not Available;Not Available;Not Available;Not Available	Not Available;Not Available;Not Available;Not Available;Not Available;Not Available;Not Available;Not Available	Not Applicable;Not Applicable;Not Applicable;Not Applicable;Not Applicable;Not Applicable;Not Applicable;Not Applicable	Not Available;Not Available;Not Available;Not Available;Not Available;Not Available;Not Available;Not Available	Not Available;Not Available;Not Available;Not Available;Not Available;Not Available;Not Available;Not Available	NO;NO;NO;NO;NO;NO;NO;NO	Chemotherapy;Chemotherapy;Chemotherapy;Chemotherapy;Chemotherapy;Chemotherapy;Chemotherapy;Immunotherapy	Not Available;Not Available;Not Available;Not Available;Not Available;Not Available;Not Available;Not Available	Not Available;Not Available;Not Available;Not Available;Not Available;Not Available;Not Available;Not Available	Not Available;Not Available;Not Available;Not Available;Not Available;Not Available;Not Available;Not Available	YES;YES;NO;NO;YES;YES;YES;YES	2012;2012;2012;2012;2012;2012;2012;2012	Not Available	NOT HISPANIC OR LATINO	YES;YES	NO;NO	Not Available;NO
TCGA-CR-5249-01A-01R-1514-07	Tumor	TCGA-CR-5249	83.86.0	Nationwide Children's Hospital	22	HNSC	9076B069-8B79-4D23-A523-3A9FB774A474	12	TCGA	2016	YES	1	Tonsil	TCGA-CR-5249	c7df3466-b9a7-4818-883b-d0cd08483570	5	-13047		0	1152	Not Available	TCGA-CR-5249-D13189	94117543-5c6a-4a74-a486-0921749aca04	Not Available	5	140	102	Cetuximab	Not Available	4	Not Available	Not Available	mg	ADJUVANT	Not Applicable	1	IV	NO	Chemotherapy	Not Available	Not Available	Not Available	Not Available	2011	Not Available	NOT HISPANIC OR LATINO	Not Available	Not Available	Not Available
TCGA-CR-5250-01A-01R-1514-07	Tumor	TCGA-CR-5250	83.86.0	Nationwide Children's Hospital	22	HNSC	F6B158A3-E034-4755-A173-3E2C0A85B2F8	12	TCGA	2016	YES	Not Available	Base of tongue	TCGA-CR-5250	9e178d80-fe90-4998-9dae-726c4beceef7	5	-26097		0	799	Not Available	TCGA-CR-5250-D13185	801adc1c-a982-44df-bacc-73807239f52b	Not Available	5	136	57	Cisplatin	Not Available	4	Not Available	232	mg	OTHER, SPECIFY IN NOTES	Primary	1	IV	NO	Chemotherapy	Not Available	Not Available	Not Available	Not Available	2011	Not Available	NOT HISPANIC OR LATINO	Not Available	Not Available	Not Available
TCGA-CR-6467-01A-11R-1873-07	Tumor	TCGA-CR-6467	145.84.0	Nationwide Children's Hospital	22	HNSC	0EC2A800-45AA-440F-97FC-66D9E5E8463B	12	TCGA	2016	YES	.5	Tonsil	TCGA-CR-6467	89f91e36-fed8-4da3-8a35-c761d6f65285	14	-21689		0	1777	Not Available																								Not Available	NOT HISPANIC OR LATINO	Not Available	Not Available	Not Available
TCGA-CR-6470-01A-11R-1873-07	Tumor	TCGA-CR-6470	145.84.0	Nationwide Children's Hospital	22	HNSC	CA1EA6CE-B4D1-4884-B392-86EE556DD50A	12	TCGA	2016	YES	2.5	Tonsil	TCGA-CR-6470	cd032ddb-55f2-4c77-8dcf-e4e630f7de6f	14	-14133		0	1521	Not Available	TCGA-CR-6470-D18070;TCGA-CR-6470-D18071	e688e6f5-6601-4957-9e1c-cdfee9ae10ae;fea7d9ad-8a18-4f97-873f-40e33b10ddc0	Not Available;Not Available	14;14	113;113	85;85	Carboplatin;Paclitaxel	Not Available;Not Available	9;9	5;5	70;221	mg;mg	ADJUVANT;ADJUVANT	Not Applicable;Not Applicable	1;1	IV;IV	NO;NO	Chemotherapy;Chemotherapy	Not Available;Not Available	350;1105	mg;mg	Not Available;Not Available	2011;2011	Not Available	NOT HISPANIC OR LATINO	Not Available	Not Available	Not Available
TCGA-CR-6471-01A-11R-1873-07	Tumor	TCGA-CR-6471	145.84.0	Nationwide Children's Hospital	22	HNSC	88D669B6-CA5F-4EBC-AEE1-6F7A30926037	12	TCGA	2016	YES	Not Available	Oral Cavity	TCGA-CR-6471	eda29281-e803-4217-8603-d6a388408611	14	-21315	1202	0		Not Available	TCGA-CR-6471-D18094;TCGA-CR-6471-D18095;TCGA-CR-6471-D18100;TCGA-CR-6471-D18097;TCGA-CR-6471-D18096;TCGA-CR-6471-D18099;TCGA-CR-6471-D18098	9fb0f015-5875-4c52-a83b-2c51e95718a7;dcba766c-51f4-4eaf-8cd5-ba8d543b600f;b35cd9ce-a17e-41b2-b4e9-85fca91f2bef;f29ebd98-c46a-4e22-89e4-0a9ac9a877fd;7f4949ac-e0b8-4e8e-a9c3-f749a60cce1f;3a077e33-bbb8-4daf-bec7-830162b7a853;bb9aca4d-12a7-4331-a8f4-e00b84d0f2b0	Not Available;Not Available;Not Available;Not Available;Not Available;Not Available;Not Available	14;14;14;14;14;14;14	595;595;1129;646;646;1087;1052	548;548;1108;618;618;1059;1052	Paclitaxel;Carboplatin;Docetaxel;Carboplatin;Paclitaxel;Methotrexate;Erbitux	Not Available;Not Available;Not Available;Not Available;Not Available;Not Available;Not Available	9;9;9;9;9;9;9	8;8;4;5;5;5;1	60;2;40;1.5;35;30;400	mg/m2;AUC;mg/m2;AUC;mg/m2;mg/m2;mg/m2	RECURRENCE;RECURRENCE;PALLIATIVE;RECURRENCE;RECURRENCE;PALLIATIVE;PALLIATIVE	Not Applicable;Not Applicable;Not Applicable;Not Applicable;Not Applicable;Not Applicable;Not Applicable	1;1;5;2;2;4;3	IV;IV;IV;IV;IV;IV;IV	NO;NO;NO;NO;NO;NO;NO	Chemotherapy;Chemotherapy;Chemotherapy;Chemotherapy;Chemotherapy;Chemotherapy;Chemotherapy	Not Available;Not Available;Not Available;Not Available;Not Available;Not Available;Not Available	Not Available;Not Available;Not Available;Not Available;Not Available;Not Available;Not Available	Not Available;Not Available;Not Available;Not Available;Not Available;Not Available;Not Available	Not Available;Not Available;Not Available;Not Available;Not Available;Not Available;Not Available	2011;2011;2011;2011;2011;2011;2011	Not Available	NOT HISPANIC OR LATINO	NO;YES;YES	YES;YES;YES	YES;Not Available;NO
TCGA-CR-6472-01A-11R-1873-07	Tumor	TCGA-CR-6472	145.84.0	Nationwide Children's Hospital	22	HNSC	BE23D331-2873-4F99-B8EC-F8C489E8B311	12	TCGA	2016	YES	0	Base of tongue	TCGA-CR-6472	0956bc67-dd55-4c54-a56a-f22f2856662a	14	-21654		0	1050	Not Available	TCGA-CR-6472-D18107;TCGA-CR-6472-D18105;TCGA-CR-6472-D18106;TCGA-CR-6472-D18108	0d395cb2-e707-41dc-a547-368fec44ca83;f0aacdec-3e07-46f8-81d7-cd39c2f4377d;ab279cef-b39d-4001-a69c-f192e59790c4;a7279564-0d73-4285-ae1f-23c713a4969e	Not Available;Not Available;Not Available;Not Available	14;14;14;14	123;84;84;123	109;28;28;109	Paclitaxel;Paclitaxel;Carboplatin;Carboplatin	Not Available;Not Available;Not Available;Not Available	9;9;9;9	3;9;9;3	30;60;2;1	mg/m2;mg/m2;AUC;AUC	OTHER, SPECIFY IN NOTES;OTHER, SPECIFY IN NOTES;OTHER, SPECIFY IN NOTES;OTHER, SPECIFY IN NOTES	Primary: Concurrent;Primary: Induction;Primary: Induction;Primary: Concurrent	2;1;1;2	IV;IV;IV;IV	NO;NO;NO;NO	Chemotherapy;Chemotherapy;Chemotherapy;Chemotherapy	Not Available;Not Available;Not Available;Not Available	Not Available;Not Available;Not Available;Not Available	Not Available;Not Available;Not Available;Not Available	Not Available;Not Available;Not Available;Not Available	2011;2011;2011;2011	Not Available	NOT HISPANIC OR LATINO
TCGA-CR-6473-01A-11R-1873-07	Tumor	TCGA-CR-6473	145.84.0	Nationwide Children's Hospital	22	HNSC	236324DA-21E9-4BBA-8652-1E20A83C9428	12	TCGA	2016	YES	Not Available	Hypopharynx	TCGA-CR-6473	e8b0a499-7e9a-4f0e-b552-8e4f284141ed	21	-24857		0	1125	Not Available	TCGA-CR-6473-D18118;TCGA-CR-6473-D18114;TCGA-CR-6473-D18116;TCGA-CR-6473-D18117	9d049d25-e038-4a57-8060-347181f9fbb2;110ebb25-790c-4464-850a-14e6f1141a97;e987a4cf-9fbe-4d81-8bce-8dca7eb4d115;b1196c02-2fd2-42ec-9fc3-8d0ed68453e1	Not Available;Not Available;Not Available;Not Available	21;21;21;21	94;40;40;94	47;19;19;47	Carboplatin;Paclitaxel;Carboplatin;Paclitaxel	Not Available;Not Available;Not Available;Not Available	9;9;9;9	2;4;4;3	1;60;2;30	AUC;mg/m2;AUC;mg/m2	OTHER, SPECIFY IN NOTES;OTHER, SPECIFY IN NOTES;OTHER, SPECIFY IN NOTES;OTHER, SPECIFY IN NOTES	Primary: Concurrent;Primary: Induction;Primary: Induction;Primary: Concurrent	2;1;1;2	IV;IV;IV;IV	NO;NO;NO;NO	Chemotherapy;Chemotherapy;Chemotherapy;Chemotherapy	Not Available;Not Available;Not Available;Not Available	Not Available;Not Available;Not Available;Not Available	Not Available;Not Available;Not Available;Not Available	Not Available;Not Available;Not Available;Not Available	2011;2011;2011;2011	Not Available	NOT HISPANIC OR LATINO	Not Available	Not Available	Not Available
TCGA-CR-6474-01A-11R-1873-07	Tumor	TCGA-CR-6474	145.84.0	Nationwide Children's Hospital	22	HNSC	9D581551-51A0-4BB8-9580-12192BF9C690	12	TCGA	2016	YES	Not Available	Larynx	TCGA-CR-6474	9f771c36-16ec-4770-bc53-f6c861343f1c	21	-18840	564	0		Not Available	TCGA-CR-6474-D18124	62a48fc6-1cdc-4d47-919b-c728e8772363	Not Available	21	Not Available	Not Available	Unknown	Not Available	9	Not Available	Not Available	Not Available	PALLIATIVE	Not Applicable	1	Not Available	NO	Chemotherapy	Not Available	Not Available	Not Available	Not Available	2011	Not Available	NOT HISPANIC OR LATINO	YES	NO	NO
TCGA-CR-6477-01A-11R-1873-07	Tumor	TCGA-CR-6477	145.84.0	Nationwide Children's Hospital	22	HNSC	B833C7DE-1BDC-4555-AF3D-F3229DE422E0	12	TCGA	2016	YES	Not Available	Base of tongue	TCGA-CR-6477	b74519ff-b338-45e9-9307-008223726dac	28	-20815		0	514	Not Available	TCGA-CR-6477-D18162;TCGA-CR-6477-D18160;TCGA-CR-6477-D18159;TCGA-CR-6477-D18161	d43ac0c9-4494-4a04-8d86-bb43829bd2bc;6a5a4518-b29e-4637-bc94-5a4a0bd4a73f;f1b1e2c5-f843-4269-8de3-8ed8cfcbd39e;aa5e852a-2e06-4c43-b91a-8881353915f0	Not Available;Not Available;Not Available;Not Available	28;28;28;28	84;66;66;84	77;10;10;77	Paclitaxel;Carboplatin;Paclitaxel;Carboplatin	Not Available;Not Available;Not Available;Not Available	9;9;9;9	2;8;8;2	30;2;60;1	mg/m2;AUC;mg/m2;AUC	OTHER, SPECIFY IN NOTES;OTHER, SPECIFY IN NOTES;OTHER, SPECIFY IN NOTES;OTHER, SPECIFY IN NOTES	Primary: Concurrent;Primary: Induction;Primary: Induction;Primary: Concurrent	2;1;1;2	IV;IV;IV;IV	NO;NO;NO;NO	Chemotherapy;Chemotherapy;Chemotherapy;Chemotherapy	Not Available;Not Available;Not Available;Not Available	Not Available;Not Available;Not Available;Not Available	Not Available;Not Available;Not Available;Not Available	Not Available;Not Available;Not Available;Not Available	2011;2011;2011;2011	Not Available	NOT HISPANIC OR LATINO	Not Available	Not Available	Not Available
TCGA-CR-6478-01A-11R-1873-07	Tumor	TCGA-CR-6478	145.84.0	Nationwide Children's Hospital	22	HNSC	15EE0EC0-6689-4A54-A466-0E66EE48034E	12	TCGA	2016	YES	Not Available	Tonsil	TCGA-CR-6478	467d5c94-1e67-4454-9e9c-9dffaa643032	21	-24244	183	0		Not Available	TCGA-CR-6478-D18137;TCGA-CR-6478-D18138;TCGA-CR-6478-D18139;TCGA-CR-6478-D18140	fdbf2d41-fe89-4dd5-8a72-826df2ff8187;2ded5b77-8b97-49b2-b957-001608457121;4f5fabcf-d4a0-4bef-8a71-853602d19e67;5967b952-2380-4f24-b6b9-7b8ae33e1a1d	Not Available;Not Available;Not Available;Not Available	21;21;21;21	107;107;162;162	44;44;125;125	Paclitaxel;Carboplatin;Paclitaxel;Carboplatin	Not Available;Not Available;Not Available;Not Available	9;9;9;9	9;9;5;5	60;2;30;1	mg/m2;AUC;mg/m2;AUC	OTHER, SPECIFY IN NOTES;OTHER, SPECIFY IN NOTES;OTHER, SPECIFY IN NOTES;OTHER, SPECIFY IN NOTES	Primary: Induction;Primary: Induction;Primary: Concurrent;Primary: Concurrent	1;1;2;2	IV;IV;IV;IV	NO;NO;NO;NO	Chemotherapy;Chemotherapy;Chemotherapy;Chemotherapy	Not Available;Not Available;Not Available;Not Available	Not Available;Not Available;Not Available;Not Available	Not Available;Not Available;Not Available;Not Available	Not Available;Not Available;Not Available;Not Available	2011;2011;2011;2011	Not Available	NOT HISPANIC OR LATINO	Not Available	Not Available	Not Available
TCGA-CR-6480-01A-11R-1873-07	Tumor	TCGA-CR-6480	145.84.0	Nationwide Children's Hospital	22	HNSC	C36D2584-9881-46EF-AE4F-5E971BC42064	12	TCGA	2016	YES	Not Available	Tonsil	TCGA-CR-6480	ba9d4568-71a8-41fc-a2be-0bf784e36d6a	21	-19472		0	362	Not Available	TCGA-CR-6480-D18147;TCGA-CR-6480-D18148;TCGA-CR-6480-D18149;TCGA-CR-6480-D18150	0c8b45d1-877d-490f-a9bd-7018c902b064;eacc0c35-00b6-46a4-8ee6-d92dfd5f7646;74a6795a-d04a-4f59-aeb8-2768a83a4dee;6d7fe68d-e479-4a41-bbf1-86df66a08e08	Not Available;Not Available;Not Available;Not Available	21;21;21;21	85;85;85;145	27;27;27;103	Paclitaxel;Cisplatin;Erbitux;Erbitux	Not Available;Not Available;Not Available;Not Available	9;9;9;9	3;3;3;7	270;75;900;250	mg/m2;mg/m2;mg/m2;mg/m2	OTHER, SPECIFY IN NOTES;OTHER, SPECIFY IN NOTES;OTHER, SPECIFY IN NOTES;OTHER, SPECIFY IN NOTES	Primary: Induction;Primary: Induction;Primary: Induction;Primary: Concurrent	1;1;1;2	IV;IV;IV;IV	NO;NO;NO;NO	Chemotherapy;Chemotherapy;Chemotherapy;Chemotherapy	Not Available;Not Available;Not Available;Not Available	Not Available;Not Available;Not Available;Not Available	Not Available;Not Available;Not Available;Not Available	Not Available;Not Available;Not Available;Not Available	2011;2011;2011;2011	Not Available	NOT HISPANIC OR LATINO	Not Available	Not Available	Not Available
TCGA-CR-6481-01A-11R-1873-07	Tumor	TCGA-CR-6481	145.84.0	Nationwide Children's Hospital	22	HNSC	183DE305-183A-4F94-9EB5-BD4BB1DC4DE4	12	TCGA	2016	YES	Not Available	Tonsil	TCGA-CR-6481	9a76bd98-1d2b-4d0f-9772-883520ff6210	28	-17203		0	311	Not Available	TCGA-CR-6481-D18171;TCGA-CR-6481-D18170	e1d10367-0f0e-4fb6-b8ec-e2914c5a0a08;71b628f8-5057-4a04-b1ab-2619ade235ae	Not Available;Not Available	28;28	73;73	31;31	Paclitaxel;Carboplatin	Not Available;Not Available	9;9	5;5	30;1	mg/m2;AUC	OTHER, SPECIFY IN NOTES;OTHER, SPECIFY IN NOTES	Primary: Concurrent;Primary: Concurrent	1;1	IV;IV	NO;NO	Chemotherapy;Chemotherapy	Not Available;Not Available	Not Available;Not Available	Not Available;Not Available	Not Available;Not Available	2011;2011	Not Available	NOT HISPANIC OR LATINO	Not Available	Not Available	Not Available
TCGA-CR-6482-01A-11R-1873-07	Tumor	TCGA-CR-6482	145.84.0	Nationwide Children's Hospital	22	HNSC	D8A026EB-D525-466A-A17C-91DC01DFCC52	12	TCGA	2016	YES	Not Available	Tonsil	TCGA-CR-6482	468649e7-1525-4b8a-8ab5-ddb27db5f022	28	-22741		0	345	Not Available	TCGA-CR-6482-D18183;TCGA-CR-6482-D18184;TCGA-CR-6482-D18179;TCGA-CR-6482-D18180;TCGA-CR-6482-D18181;TCGA-CR-6482-D18185;TCGA-CR-6482-D18182	6c867000-4574-4f11-99ef-5e231decc673;31e31610-02a7-4bc4-b391-97fc88f771d3;0de72eb9-07cc-406f-a941-36f6e8cf4ece;36d20c27-5cb4-401a-a4b6-b5386e99d841;a32b9afc-4e03-4764-8096-852dc714b1d7;7d00a4d2-95cb-4518-8663-41791801c47b;29ddfe37-3d8a-4f3b-9fe1-fa319b656b0e	Not Available;Not Available;Not Available;Not Available;Not Available;Not Available;Not Available	28;28;28;28;28;28;28	137;193;74;74;74;193;137	88;158;74;74;74;158;88	Carboplatin;Paclitaxel;Paclitaxel;Cisplatin;Erbitux;Carboplatin;Paclitaxel	Not Available;Not Available;Not Available;Not Available;Not Available;Not Available;Not Available	9;9;9;9;9;9;9	8;6;1;1;1;6;8	2;30;90;75;400;1;60	AUC;mg/m2;mg/m2;mg/m2;mg/m2;AUC;mg/m2	OTHER, SPECIFY IN NOTES;OTHER, SPECIFY IN NOTES;OTHER, SPECIFY IN NOTES;OTHER, SPECIFY IN NOTES;OTHER, SPECIFY IN NOTES;OTHER, SPECIFY IN NOTES;OTHER, SPECIFY IN NOTES	Primary: Induction;Primary: Concurrent;Primary: Induction;Primary: Induction;Primary: Induction;Primary: Concurrent;Primary: Induction	2;3;1;1;1;3;2	IV;IV;IV;IV;IV;IV;IV	NO;NO;NO;NO;NO;NO;NO	Chemotherapy;Chemotherapy;Chemotherapy;Chemotherapy;Chemotherapy;Chemotherapy;Chemotherapy	Not Available;Not Available;Not Available;Not Available;Not Available;Not Available;Not Available	Not Available;Not Available;Not Available;Not Available;Not Available;Not Available;Not Available	Not Available;Not Available;Not Available;Not Available;Not Available;Not Available;Not Available	Not Available;Not Available;Not Available;Not Available;Not Available;Not Available;Not Available	2011;2011;2011;2011;2011;2011;2011	Not Available	NOT HISPANIC OR LATINO	Not Available	Not Available	Not Available
TCGA-CR-6484-01A-11R-1873-07	Tumor	TCGA-CR-6484	145.84.0	Nationwide Children's Hospital	22	HNSC	5286CA93-7BC8-4455-AB9C-5D1BB08F47F8	12	TCGA	2016	NO	Not Available	Oral Cavity	TCGA-CR-6484	aa10d6da-ba20-43e8-ab8f-a9b4b58738b4	28	-24569		0	354	Not Available	TCGA-CR-6484-D18193;TCGA-CR-6484-D18192	5ccdbbb6-6fc9-4bdb-9ba6-ac2bb647c297;8c0c6484-903e-44fa-b9a5-2fba8742f954	Not Available;Not Available	28;28	144;144	109;109	Carboplatin;Paclitaxel	Not Available;Not Available	9;9	6;6	1;30	AUC;mg/m2	OTHER, SPECIFY IN NOTES;OTHER, SPECIFY IN NOTES	Primary: Concurrent;Primary: Concurrent	1;1	IV;IV	NO;NO	Chemotherapy;Chemotherapy	Not Available;Not Available	Not Available;Not Available	Not Available;Not Available	Not Available;Not Available	2011;2011	Not Available	NOT HISPANIC OR LATINO	Not Available	Not Available	Not Available
TCGA-CR-6487-01A-11R-1873-07	Tumor	TCGA-CR-6487	145.84.0	Nationwide Children's Hospital	22	HNSC	FAE9E871-919A-45C8-BE7C-1020B8EC6A1D	12	TCGA	2016	YES	Not Available	Tonsil	TCGA-CR-6487	9ae5101b-6031-4ab1-bfca-198c41af3184	5	-18331		0	234	Not Available																								Not Available	NOT HISPANIC OR LATINO	Not Available	Not Available	Not Available
TCGA-CR-6488-01A-12R-2081-07	Tumor	TCGA-CR-6488	188.78.0	Nationwide Children's Hospital	22	HNSC	57FCABB4-FE3E-4668-BC93-0EB82A92B484	12	TCGA	2016	YES	Not Available	Oral Tongue	TCGA-CR-6488	f458d21d-1854-4baf-9eb1-79c29b663804	1	-25176		0	379	Not Available																								Not Available	NOT HISPANIC OR LATINO	Not Available	Not Available	Not Available
TCGA-CR-6491-01A-11R-1873-07	Tumor	TCGA-CR-6491	145.84.0	Nationwide Children's Hospital	22	HNSC	D2E0BB90-79E1-4639-8B24-0E8880E89D6D	12	TCGA	2016	YES	Not Available	Floor of mouth	TCGA-CR-6491	5fce954c-11b9-41f4-9471-4b5bdc0efa7f	5	-22125		0	350	Not Available	TCGA-CR-6491-D48386;TCGA-CR-6491-D48387	6F1DECF0-9FA8-4FB1-B012-34FE166CDE44;DEDA62B1-19CC-4414-A551-BB26684707C1	Not Available;Not Available	12;12	201;201	191;191	Carboplatin;Taxotere	Complete Response;Complete Response	9;9	Not Available;Not Available	Not Available;Not Available	Not Available;Not Available	Not Available;Not Available	Not Applicable;Not Applicable	Not Available;Not Available	Not Available;Not Available	NO;NO	Chemotherapy;Chemotherapy	Not Available;Not Available	Not Available;Not Available	Not Available;Not Available	NO;NO	2013;2013	Not Available	NOT HISPANIC OR LATINO
TCGA-CR-6492-01A-12R-2081-07	Tumor	TCGA-CR-6492	188.78.0	Nationwide Children's Hospital	22	HNSC	F88D93DF-1F16-4630-AC1A-1FF49B3FE30C	12	TCGA	2016	YES	Not Available	Hard Palate	TCGA-CR-6492	a98263a5-cc90-4734-b6f1-f0108bfd5cac	1	-28600		0	479	Not Available																								Not Available	NOT HISPANIC OR LATINO	Not Available	Not Available	Not Available
TCGA-CR-6493-01A-11R-1873-07	Tumor	TCGA-CR-6493	145.84.0	Nationwide Children's Hospital	22	HNSC	CA019F35-9A4F-453A-B330-B4DF4223A168	12	TCGA	2016	YES	Not Available	Oral Tongue	TCGA-CR-6493	b43b8aed-d166-4f00-8144-24ad3fe314ed	5	-25432	282	0		Not Available	TCGA-CR-6493-D48390;TCGA-CR-6493-D48391	45240C23-AFA5-410C-BF86-CD9AE5E75F21;3CD427A7-86D8-4899-8A89-F9A1AFCE4570	Not Available;Not Available	12;12	150;150	100;100	Paclitaxel;Carboplatin	Complete Response;Complete Response	9;9	Not Available;Not Available	Not Available;Not Available	Not Available;Not Available	Not Available;Not Available	Not Applicable;Not Applicable	Not Available;Not Available	Not Available;Not Available	NO;NO	Chemotherapy;Chemotherapy	Not Available;Not Available	Not Available;Not Available	Not Available;Not Available	NO;NO	2013;2013	Not Available	NOT HISPANIC OR LATINO
TCGA-CR-7364-01A-11R-2016-07	Tumor	TCGA-CR-7364	164.84.0	Nationwide Children's Hospital	22	HNSC	6F7DB88B-8EEE-4F9E-9AD8-B24560C75815	12	TCGA	2016	NO	Not Available	Larynx	TCGA-CR-7364	62887787-9385-470a-a993-98ede58f0940	Not Available	-24192		0	1435	Not Available																								Not Available	NOT HISPANIC OR LATINO	Not Available	Not Available	Not Available
TCGA-CR-7365-01A-11R-2016-07	Tumor	TCGA-CR-7365	164.84.0	Nationwide Children's Hospital	22	HNSC	1FF32067-62A9-42DC-91AF-9BC7BFAB1EE4	12	TCGA	2016	YES	Not Available	Oral Cavity	TCGA-CR-7365	a8fe444f-57a5-4364-ab55-09f41ecb4591	Not Available	-22101		0	1191	Not Available	TCGA-CR-7365-D22010	50c12910-84c1-463f-baeb-767591f4ae80	Not Available	Not Available	192	140	Unknown	Not Available	2	Not Available	Not Available	Not Available	ADJUVANT	Not Applicable	1	Not Available	NO	Chemotherapy	Not Available	Not Available	Not Available	Not Available	2012	Not Available	NOT HISPANIC OR LATINO	Not Available	Not Available	Not Available
TCGA-CR-7367-01A-11R-2016-07	Tumor	TCGA-CR-7367	164.84.0	Nationwide Children's Hospital	22	HNSC	4800E69C-16EB-4F62-BDD6-524A2DCE09C1	12	TCGA	2016	YES	6	Oral Cavity	TCGA-CR-7367	1c95de68-18d9-429b-b379-878838f88a72	Not Available	-19116		0	1440	Not Available	TCGA-CR-7367-D31437;TCGA-CR-7367-D31438	8e48c886-230a-4206-b160-0d28143859ea;eddbfcb7-4642-43aa-914e-19656a954745	Not Available;Not Available	2;2	98;98	90;90	Paclitaxel;Carboplatin	Unknown;Unknown	5;5	Not Available;Not Available	Not Available;Not Available	Not Available;Not Available	Not Available;Not Available	Not Applicable;Not Applicable	Not Available;Not Available	Not Available;Not Available	NO;NO	Chemotherapy;Chemotherapy	Not Available;Not Available	Not Available;Not Available	Not Available;Not Available	NO;NO	2012;2012	Not Available	NOT HISPANIC OR LATINO	Not Available	Not Available	Not Available
TCGA-CR-7368-01A-11R-2132-07	Tumor	TCGA-CR-7368	190.78.0	Nationwide Children's Hospital	22	HNSC	DD5E9C97-290C-44C9-A277-2E338421C58E	12	TCGA	2016	YES	Not Available	Oral Cavity	TCGA-CR-7368	27c28c89-f4e7-4aec-a806-c0da7756e47f	9	-19876		0	1245	Not Available	TCGA-CR-7368-D31315	f2d259dd-7a93-4828-93dd-c2a93ea9e5dd	Not Available	30	148	Not Available	Unknown	Complete Response	4	Not Available	Not Available	Not Available	Not Available	Not Applicable	Not Available	Not Available	NO	Chemotherapy	Not Available	Not Available	Not Available	NO	2012	Not Available	NOT HISPANIC OR LATINO	Not Available	Not Available	Not Available
TCGA-CR-7369-01A-11R-2132-07	Tumor	TCGA-CR-7369	190.78.0	Nationwide Children's Hospital	22	HNSC	9EEA0AD8-DE23-4FE4-8572-6047730458EA	12	TCGA	2016	YES	Not Available	Oral Cavity	TCGA-CR-7369	85a26115-1160-411b-8384-44eedc947fb2	9	-21897	1090	0		Not Available																								Not Available	NOT HISPANIC OR LATINO	Not Available	Not Available	Not Available
TCGA-CR-7370-01A-11R-2132-07	Tumor	TCGA-CR-7370	190.78.0	Nationwide Children's Hospital	22	HNSC	F391B7FF-E18F-404E-BFA8-F102DB69FE98	12	TCGA	2016	YES	Not Available	Larynx	TCGA-CR-7370	890b5a8b-703d-428d-8833-bc0ce26e80aa	9	-26468		0	105	Not Available																								Not Available	NOT HISPANIC OR LATINO	Not Available	Not Available	Not Available
TCGA-CR-7371-01A-11R-2016-07	Tumor	TCGA-CR-7371	164.84.0	Nationwide Children's Hospital	22	HNSC	EE6C3228-CB6F-41F7-A464-AF10A97CB531	12	TCGA	2016	NO	Not Available	Larynx	TCGA-CR-7371	f8acc36b-1e7f-44b8-83b7-f894ad201833	Not Available	-16568	94	0		Not Available																								Not Available	NOT HISPANIC OR LATINO	Not Available	Not Available	Not Available
TCGA-CR-7372-01A-11R-2016-07	Tumor	TCGA-CR-7372	164.84.0	Nationwide Children's Hospital	22	HNSC	A91598BA-F013-4854-BEA1-8D451583005F	12	TCGA	2016	YES	Not Available	Oral Tongue	TCGA-CR-7372	45c3cd39-1c5d-4e26-8afc-5bed3c230088	Not Available	-16610		0	759	Not Available																								Not Available	NOT HISPANIC OR LATINO	Not Available	Not Available	Not Available
TCGA-CR-7373-01A-11R-2016-07	Tumor	TCGA-CR-7373	164.84.0	Nationwide Children's Hospital	22	HNSC	C91EBE43-7DA6-462C-BB78-EC6DFDE2E522	12	TCGA	2016	NO	Not Available	Oral Cavity	TCGA-CR-7373	242bdece-75dc-45b9-a9b3-3e1bc305a3e3	Not Available	-24448		0	889	Not Available	TCGA-CR-7373-D22019	3cb4ba34-fa16-464b-9594-4b9bcf7a64fa	Not Available	14	138	96	Cisplatin	Not Available	2	Not Available	Not Available	Not Available	ADJUVANT	Not Applicable	1	IV	NO	Chemotherapy	Not Available	Not Available	Not Available	Not Available	2012	Not Available	NOT HISPANIC OR LATINO	Not Available	Not Available	Not Available
TCGA-CR-7374-01A-11R-2016-07	Tumor	TCGA-CR-7374	164.84.0	Nationwide Children's Hospital	22	HNSC	A6FF1855-3F88-4F42-9365-7030C657CFDE	12	TCGA	2016	YES	Not Available	Larynx	TCGA-CR-7374	fc3ea52b-67ac-4876-949d-5464c436f3db	Not Available	-24558		0	30	Not Available																								Not Available	NOT HISPANIC OR LATINO
TCGA-CR-7376-01A-11R-2132-07	Tumor	TCGA-CR-7376	190.78.0	Nationwide Children's Hospital	22	HNSC	4B83424A-C4FE-425A-B308-BE7113D54E73	12	TCGA	2016	YES	Not Available	Oral Cavity	TCGA-CR-7376	b3bed685-e9db-436b-9938-2b8a0a0d5b83	25	-30670		0	972	Not Available																								Not Available	NOT HISPANIC OR LATINO	Not Available	Not Available	Not Available
TCGA-CR-7377-01A-11R-2016-07	Tumor	TCGA-CR-7377	164.84.0	Nationwide Children's Hospital	22	HNSC	E5D12F18-F61B-42F7-ACD3-A1C5D8B57CE8	12	TCGA	2016	YES	Not Available	Oral Cavity	TCGA-CR-7377	f76ab158-2cf9-4df7-b6fe-727dd69a369f	Not Available	-21371	279	0		Not Available																								Not Available	NOT HISPANIC OR LATINO	Not Available;Not Available	Not Available;Not Available	Not Available;Not Available
TCGA-CR-7379-01A-11R-2016-07	Tumor	TCGA-CR-7379	164.84.0	Nationwide Children's Hospital	22	HNSC	4F3DA8BA-EB20-4FF4-9EF8-4321F31456E7	12	TCGA	2016	NO	Not Available	Oral Cavity	TCGA-CR-7379	dea53b7f-3e7d-41a3-ae2d-58548fe0b595	Not Available	-28763		0	1036	Not Available																								Not Available	NOT HISPANIC OR LATINO	Not Available	Not Available	Not Available
TCGA-CR-7380-01A-11R-2016-07	Tumor	TCGA-CR-7380	164.84.0	Nationwide Children's Hospital	22	HNSC	D88E62E7-048F-4D75-87C2-50ECFCE97B3B	12	TCGA	2016	YES	0	Oral Cavity	TCGA-CR-7380	53b254b7-021f-43df-af9b-3fc01b87479e	Not Available	-21215	606	0		Not Available	TCGA-CR-7380-D22063	fbe0eb78-08e9-4569-aecf-947cac0d6bfd	Not Available	15	153	92	Unknown	Not Available	2	Not Available	Not Available	Not Available	ADJUVANT	Not Applicable	1	IV	NO	Chemotherapy	Not Available	Not Available	Not Available	Not Available	2012	Not Available	NOT HISPANIC OR LATINO	NO	NO	NO
TCGA-CR-7382-01A-11R-2132-07	Tumor	TCGA-CR-7382	190.78.0	Nationwide Children's Hospital	22	HNSC	9B0C6058-CE47-4B7E-A448-06CE036EEC7A	12	TCGA	2016	YES	Not Available	Oral Tongue	TCGA-CR-7382	f030e410-2585-461e-ad23-9fdf026ac06c	25	-18078		0	796	Not Available	TCGA-CR-7382-D31300	ffeae0f6-8f41-4bee-b47d-5057541e48d6	Not Available	30	159	Not Available	Not Available	Complete Response	4	Not Available	Not Available	Not Available	Not Available	Not Applicable	Not Available	Not Available	NO	Chemotherapy	Not Available	Not Available	Not Available	NO	2012	Not Available	NOT HISPANIC OR LATINO	NO	NO	YES
TCGA-CR-7383-01A-11R-2132-07	Tumor	TCGA-CR-7383	190.78.0	Nationwide Children's Hospital	22	HNSC	4CCBB91F-1821-4D27-93FF-D33DAFB7BAA8	12	TCGA	2016	YES	Not Available	Tonsil	TCGA-CR-7383	16779eed-f386-4e8f-8475-04d33b9dd160	25	-29122	521	0		Not Available	TCGA-CR-7383-D31295;TCGA-CR-7383-D31296	5a5fcf41-1159-447b-ab81-b1c907ecdbee;c94ca080-9be6-4783-93e7-5136c884689a	Not Available;Not Available	30;30	483;483	462;462	Paclitaxel;Carboplatin	Partial Response;Partial Response	4;4	Not Available;Not Available	Not Available;Not Available	Not Available;Not Available	Not Available;Not Available	Not Applicable;Not Applicable	Not Available;Not Available	Not Available;Not Available	NO;NO	Chemotherapy;Chemotherapy	Not Available;Not Available	Not Available;Not Available	Not Available;Not Available	NO;NO	2012;2012	Not Available	NOT HISPANIC OR LATINO	YES	YES	NO
TCGA-CR-7385-01A-11R-2016-07	Tumor	TCGA-CR-7385	164.84.0	Nationwide Children's Hospital	22	HNSC	052984AE-3FB0-4F87-8638-5C8C78E7018D	12	TCGA	2016	YES	2	Tonsil	TCGA-CR-7385	9f89510c-ed07-471f-b35e-7c87c237b9fe	15	-15477		0	997	Not Available	TCGA-CR-7385-D22072	25d956a8-4238-49b9-8ad9-f7345e7bcbff	Not Available	15	87	29	Not Available	Not Available	2	Not Available	Not Available	Not Available	ADJUVANT	Not Applicable	1	IV	NO	Chemotherapy	Not Available	Not Available	Not Available	Not Available	2012	Not Available	NOT HISPANIC OR LATINO	Not Available	Not Available	Not Available
TCGA-CR-7386-01A-11R-2016-07	Tumor	TCGA-CR-7386	164.84.0	Nationwide Children's Hospital	22	HNSC	8500914D-416E-41B8-9957-0158CAF41DE0	12	TCGA	2016	YES	1	Oral Cavity	TCGA-CR-7386	3f2e0c8a-6d5f-4763-be60-5a70994d31a1	15	-25238		0	1430	Not Available	TCGA-CR-7386-D22112;TCGA-CR-7386-D22113	b1d6f02a-a60e-4e13-abd3-21f693684a17;e4267bc2-5cd3-4cb5-824e-a070104fec90	Not Available;Not Available	15;15	132;132	97;97	Paclitaxel;Carboplatin	Not Available;Not Available	2;2	6;6	30;1	mg/m2;AUC	ADJUVANT;ADJUVANT	Not Applicable;Not Applicable	1;1	IV;IV	NO;NO	Chemotherapy;Chemotherapy	Not Available;Not Available	Not Available;Not Available	Not Available;Not Available	Not Available;Not Available	2012;2012	Not Available	NOT HISPANIC OR LATINO	NO	NO	Not Available
TCGA-CR-7388-01A-11R-2016-07	Tumor	TCGA-CR-7388	164.84.0	Nationwide Children's Hospital	22	HNSC	314032D5-BD2F-419F-9E3D-448744AF41B6	12	TCGA	2016	YES	Not Available	Larynx	TCGA-CR-7388	511b1de1-b855-47bb-a2f8-58dc5792be47	15	-25728	823	0		Not Available	TCGA-CR-7388-D22122;TCGA-CR-7388-D22124;TCGA-CR-7388-D22121;TCGA-CR-7388-D22123;TCGA-CR-7388-D22120	3c965cbf-deea-4977-948a-84b6b2586f9c;604d13bf-46bb-407f-adac-e2f80c779a9e;410f8a74-5fb7-4ae7-9cc9-7cc310fe3f77;ceb5f93d-3576-47c9-ae6d-398c1ddb8875;7cc6e38c-50c0-4f55-925f-060643729c57	Not Available;Not Available;Not Available;Not Available;Not Available	15;15;15;15;15	121;733;93;121;93	114;705;65;114;65	Paclitaxel;Erbitux;Carboplatin;Carboplatin;Paclitaxel	Not Available;Not Available;Not Available;Not Available;Not Available	2;2;2;2;2	2;Not Available;5;2;5	30;Not Available;2;1;60	mg/m2;Not Available;AUC;AUC;mg/m2	OTHER, SPECIFY IN NOTES;PALLIATIVE;OTHER, SPECIFY IN NOTES;OTHER, SPECIFY IN NOTES;OTHER, SPECIFY IN NOTES	Primary: Concurrent;Not Applicable;Primary: Induction;Primary: Concurrent;Primary: Induction	2;3;1;2;1	IV;IV;IV;IV;IV	NO;NO;NO;NO;NO	Chemotherapy;Chemotherapy;Chemotherapy;Chemotherapy;Chemotherapy	Not Available;Not Available;Not Available;Not Available;Not Available	Not Available;Not Available;Not Available;Not Available;Not Available	Not Available;Not Available;Not Available;Not Available;Not Available	Not Available;Not Available;Not Available;Not Available;Not Available	2012;2012;2012;2012;2012	Not Available	NOT HISPANIC OR LATINO	YES;NO	NO;NO	NO;YES
TCGA-CR-7389-01A-11R-2016-07	Tumor	TCGA-CR-7389	164.84.0	Nationwide Children's Hospital	22	HNSC	D7A8ED33-F9A6-448B-9980-7F8D5D86A667	12	TCGA	2016	YES	1	Larynx	TCGA-CR-7389	5422a86d-f9ff-4fb6-873e-bf7cc3de50e5	15	-20169		0	392	Not Available	TCGA-CR-7389-D31444;TCGA-CR-7389-D31445	b376a0f8-a455-4d12-af7d-366f26231773;dee165a1-2b0b-45ed-aab8-7f023c2ef8dd	Not Available;Not Available	2;2	73;73	31;31	Paclitaxel;Carboplatin	Complete Response;Complete Response	5;5	Not Available;Not Available	Not Available;Not Available	Not Available;Not Available	Not Available;Not Available	Not Applicable;Not Applicable	Not Available;Not Available	Not Available;Not Available	NO;NO	Chemotherapy;Chemotherapy	Not Available;Not Available	Not Available;Not Available	Not Available;Not Available	NO;NO	2012;2012	Not Available	NOT HISPANIC OR LATINO	Not Available	Not Available	Not Available
TCGA-CR-7390-01A-11R-2016-07	Tumor	TCGA-CR-7390	164.84.0	Nationwide Children's Hospital	22	HNSC	20F47F37-5C0D-405E-8103-950CE1D91016	12	TCGA	2016	YES	6	Oral Tongue	TCGA-CR-7390	67f2ac9b-b9fb-4ffd-ae60-6ff1114e9290	16	-24575		0	907	Not Available																								Not Available	NOT HISPANIC OR LATINO
TCGA-CR-7391-01A-11R-2016-07	Tumor	TCGA-CR-7391	164.84.0	Nationwide Children's Hospital	22	HNSC	48A15597-2BF5-409C-9FC0-AEC8D4C4AA2E	12	TCGA	2016	YES	Not Available	Oral Tongue	TCGA-CR-7391	832316ee-08ab-412b-9e4d-8a57ff84bc11	16	-13508		0	913	Not Available																								Not Available	NOT HISPANIC OR LATINO	Not Available	Not Available	Not Available
TCGA-CR-7392-01A-11R-2016-07	Tumor	TCGA-CR-7392	164.84.0	Nationwide Children's Hospital	22	HNSC	654D8553-4AD1-49E4-9CCD-5BD3C38FAFF7	12	TCGA	2016	NO	Not Available	Oral Tongue	TCGA-CR-7392	03aca47b-7653-4938-9178-ed7c37eee6d5	16	-24650		0	946	Not Available																								Not Available	NOT HISPANIC OR LATINO
TCGA-CR-7393-01A-11R-2016-07	Tumor	TCGA-CR-7393	164.84.0	Nationwide Children's Hospital	22	HNSC	C94B960F-8D9B-4F4F-9F9D-C7C2DFFE3DC8	12	TCGA	2016	YES	Not Available	Oral Tongue	TCGA-CR-7393	0f4bb968-6e10-4a86-a03e-37b61d084f31	16	-9750		0	908	Not Available	TCGA-CR-7393-D48405;TCGA-CR-7393-D48406	E92A0F79-D2AE-45A5-8F93-D2FC5E135AD9;1FEEC2B3-39D9-4D4A-9F17-0D1C3711ADEC	Not Available;Not Available	12;12	105;105	-303;63	Paclitaxel;Carboplatin	Complete Response;Complete Response	9;9	Not Available;Not Available	Not Available;Not Available	Not Available;Not Available	Not Available;Not Available	Not Applicable;Not Applicable	Not Available;Not Available	Not Available;Not Available	NO;NO	Chemotherapy;Chemotherapy	Not Available;Not Available	Not Available;Not Available	Not Available;Not Available	NO;NO	2013;2013	Not Available	NOT HISPANIC OR LATINO
TCGA-CR-7394-01A-11R-2016-07	Tumor	TCGA-CR-7394	164.84.0	Nationwide Children's Hospital	22	HNSC	8860A285-C392-405D-BC78-6675460159AF	12	TCGA	2016	NO	Not Available	Oral Tongue	TCGA-CR-7394	d296cdb5-a0f6-40cc-8ce7-73e4ccd176f3	16	-25581		0	898	Not Available																								Not Available	NOT HISPANIC OR LATINO
TCGA-CR-7395-01A-11R-2016-07	Tumor	TCGA-CR-7395	164.84.0	Nationwide Children's Hospital	22	HNSC	B1B000AF-CFAC-4A62-A23D-44CD4A2A32EB	12	TCGA	2016	YES	Not Available	Oral Cavity	TCGA-CR-7395	a6622196-897f-469e-a21d-c4a12ed39908	16	-29527		0	930	Not Available																								Not Available	NOT HISPANIC OR LATINO	Not Available	Not Available	Not Available
TCGA-CR-7397-01A-11R-2016-07	Tumor	TCGA-CR-7397	164.84.0	Nationwide Children's Hospital	22	HNSC	95D0F058-340F-40F5-8B72-B66EAD1A1491	12	TCGA	2016	YES	1	Oral Tongue	TCGA-CR-7397	a40bb4bc-9ee6-4a8b-8a33-3a4ed78f69a7	17	-16351		0	216	Not Available	TCGA-CR-7397-D48414;TCGA-CR-7397-D48415	5952F59E-E18F-4652-8F1C-60058DEEA28A;01E6303C-30A7-4178-A9AA-E2505DC4B8C3	Not Available;Not Available	12;12	99;99	63;63	Paclitaxel;Carboplatin	Complete Response;Complete Response	9;9	Not Available;Not Available	Not Available;Not Available	Not Available;Not Available	Not Available;Not Available	Not Applicable;Not Applicable	Not Available;Not Available	Not Available;Not Available	NO;NO	Chemotherapy;Chemotherapy	Not Available;Not Available	Not Available;Not Available	Not Available;Not Available	NO;NO	2013;2013	Not Available	NOT HISPANIC OR LATINO
TCGA-CR-7398-01A-11R-2016-07	Tumor	TCGA-CR-7398	164.84.0	Nationwide Children's Hospital	22	HNSC	611F2678-2C5E-4703-83F4-26FBB59B35EB	12	TCGA	2016	YES	Not Available	Larynx	TCGA-CR-7398	e189f082-c748-43d4-96ce-0c381e376531	17	-19468		0	156	Not Available																								Not Available	NOT HISPANIC OR LATINO	Not Available	Not Available	Not Available
TCGA-CR-7399-01A-11R-2016-07	Tumor	TCGA-CR-7399	164.84.0	Nationwide Children's Hospital	22	HNSC	DD7C1253-30B6-481B-9EE1-7A59C66F04DB	12	TCGA	2016	YES	Not Available	Larynx	TCGA-CR-7399	ed6ac43c-d921-4342-aeec-9ff8d8a31919	Not Available	-22182		0	181	Not Available																								Not Available	NOT HISPANIC OR LATINO	Not Available	Not Available	Not Available
TCGA-CR-7401-01A-11R-2016-07	Tumor	TCGA-CR-7401	164.84.0	Nationwide Children's Hospital	22	HNSC	C684D090-03D4-4EC5-A972-AC304582084B	12	TCGA	2016	YES	Not Available	Oral Tongue	TCGA-CR-7401	e2e64c5d-44ba-42f0-ab9d-ec16b21d2545	28	-23420		0	1077	Not Available																								Not Available	NOT HISPANIC OR LATINO	Not Available	Not Available	Not Available
TCGA-CR-7402-01A-11R-2016-07	Tumor	TCGA-CR-7402	164.84.0	Nationwide Children's Hospital	22	HNSC	E27FFF36-7AB1-4C20-96B7-5AC60A90606E	12	TCGA	2016	YES	Not Available	Larynx	TCGA-CR-7402	91e30123-2265-4cf1-8389-f6462897837c	28	-25138		0	911	Not Available	TCGA-CR-7402-D28765;TCGA-CR-7402-D28764	c002e09e-21e2-4eda-8436-2360bfb1f0d9;c146e17b-6c75-4b21-9724-939a26ed21d8	Not Available;Not Available	28;28	101;101	37;37	Carboplatin;Paclitaxel	Not Available;Not Available	2;2	Not Available;Not Available	1.5;40	AUC;mg/m2	OTHER, SPECIFY IN NOTES;OTHER, SPECIFY IN NOTES	Primary: Concurrent;Primary: Concurrent	1;1	IV;IV	NO;NO	Chemotherapy;Chemotherapy	Not Available;Not Available	Not Available;Not Available	Not Available;Not Available	Not Available;Not Available	2012;2012	Not Available	NOT HISPANIC OR LATINO	Not Available	Not Available	Not Available
TCGA-CR-7404-01A-11R-2132-07	Tumor	TCGA-CR-7404	190.78.0	Nationwide Children's Hospital	22	HNSC	2AD28EF6-679D-4911-87BD-1EC10D74550E	12	TCGA	2016	YES	Not Available	Tonsil	TCGA-CR-7404	d189a6c6-210f-4957-b500-457d5ce3f867	9	-19532		0	1472	Not Available	TCGA-CR-7404-D31324;TCGA-CR-7404-D31325;TCGA-CR-7404-D31328;TCGA-CR-7404-D31329;TCGA-CR-7404-D31330;TCGA-CR-7404-D31331;TCGA-CR-7404-D31332;TCGA-CR-7404-D31333;TCGA-CR-7404-D31334;TCGA-CR-7404-D31335;TCGA-CR-7404-D31336	050b0ab3-3223-4d90-b068-8cad729354b2;9c6e53db-fd86-4bbb-88d2-282ea90d125b;81337c17-1592-4632-bf4c-c4025217872a;6ae2d638-977f-4268-bcaf-f28c42e032ed;6db87718-9327-44a3-92f3-0fe89b16b4bb;af883e89-1ffa-4b40-b00c-bd0232ce8cb7;fc1b59d1-7ac2-4385-896c-020d6cdf8787;ff9ed268-d746-4ee3-a453-67521f65380a;3fb10b09-e755-48b8-a5aa-af8ac116f134;9ba61073-c6e7-43b8-b8a3-58776bd5447e;5ca7e448-99a9-48ac-8237-bcaca…	Not Available;Not Available;Not Available;Not Available;Not Available;Not Available;Not Available;Not Available;Not Available;Phase I Trial;Not Available	30;30;30;30;30;30;30;30;30;30;30	67;67;135;135;354;415;599;634;1080;1318;1416	18;18;85;85;298;375;466;606;1052;1297;1332	Paclitaxel;Carboplatin;Paclitaxel;Carboplatin;Cetuximab;Xeloda;Cetuximab;Paclitaxel;Methotrexate;Not Available;Pemetrexed	Unknown;Unknown;Complete Response;Complete Response;Partial Response;Unknown;Unknown;Stable Disease;Unknown;Clinical Progressive Disease;Unknown	4;4;4;4;4;4;4;4;4;4;4	Not Available;Not Available;Not Available;Not Available;Not Available;Not Available;Not Available;Not Available;Not Available;Not Available;Not Available	Not Available;Not Available;Not Available;Not Available;Not Available;Not Available;Not Available;Not Available;Not Available;Not Available;Not Available	Not Available;Not Available;Not Available;Not Available;Not Available;Not Available;Not Available;Not Available;Not Available;Not Available;Not Available	Not Available;Not Available;Not Available;Not Available;Not Available;Not Available;Not Available;Not Available;Not Available;Not Available;Not Available	Not Applicable;Not Applicable;Not Applicable;Not Applicable;Not Applicable;Not Applicable;Not Applicable;Not Applicable;Not Applicable;Not Applicable;Not Applicable	Not Available;Not Available;Not Available;Not Available;Not Available;Not Available;Not Available;Not Available;Not Available;Not Available;Not Available	Not Available;Not Available;Not Available;Not Available;Not Available;Not Available;Not Available;Not Available;Not Available;Not Available;Not Available	NO;NO;NO;NO;NO;NO;NO;NO;NO;NO;NO	Chemotherapy;Chemotherapy;Chemotherapy;Chemotherapy;Chemotherapy;Chemotherapy;Chemotherapy;Chemotherapy;Chemotherapy;Chemotherapy;Chemotherapy	Not Available;Not Available;Not Available;Not Available;Not Available;Not Available;Not Available;Not Available;Not Available;Not Available;Not Available	Not Available;Not Available;Not Available;Not Available;Not Available;Not Available;Not Available;Not Available;Not Available;Not Available;Not Available	Not Available;Not Available;Not Available;Not Available;Not Available;Not Available;Not Available;Not Available;Not Available;Not Available;Not Available	NO;NO;NO;NO;NO;NO;NO;NO;NO;YES;NO	2012;2012;2012;2012;2012;2012;2012;2012;2012;2012;2012	Not Available	NOT HISPANIC OR LATINO	NO;NO;YES;YES	NO;NO;YES;NO	YES;YES;YES;YES
TCGA-CV-5430-01A-02R-1686-07	Tumor	TCGA-CV-5430	107.82.0	Nationwide Children's Hospital	22	HNSC	8C56F619-CA60-4AD1-B0A4-5A10D43413C9	12	TCGA	2016	YES	Not Available	Larynx	TCGA-CV-5430	a4fcb7fd-9c22-4486-99c5-97da050c9fb3	23	-22577		0	4115	Not Available	TCGA-CV-5430-D18730;TCGA-CV-5430-D20804;TCGA-CV-5430-D20811	92d2595c-3bda-4b55-8b49-6bde38d97500;da6eb296-76b5-4ff2-a086-bf5096c49af9;47f08294-0a31-49e4-8fcc-da04c9605738	Not Available;Not Available;Not Available	9;23;23	1702;1702;1702	1641;1641;1641	Carboplatinum;Paclitaxel;Irinotecan	Not Available;Not Available;Not Available	11;1;1	4;4;4	Not Available;Not Available;Not Available	Not Available;Not Available;Not Available	RECURRENCE;RECURRENCE;RECURRENCE	Not Applicable;Not Applicable;Not Applicable	Not Available;Not Available;Not Available	IV;IV;IV	NO;NO;NO	Chemotherapy;Chemotherapy;Chemotherapy	Not Available;Not Available;Not Available	Not Available;Not Available;Not Available	Not Available;Not Available;Not Available	Not Available;Not Available;Not Available	2011;2012;2012	Not Available	HISPANIC OR LATINO	YES	NO	NO
TCGA-CV-5431-01A-01R-1514-07	Tumor	TCGA-CV-5431	83.86.0	Nationwide Children's Hospital	22	HNSC	B1E96DCD-3C27-4BF1-B06C-FA31D02C02AF	12	TCGA	2016	YES	2	Larynx	TCGA-CV-5431	64bb5550-2735-4401-a0db-58ec1020a32d	23	-26953	522	0	522	176																								Not Available	HISPANIC OR LATINO	NO	NO	Not Available
TCGA-CV-5432-01A-02R-1686-07	Tumor	TCGA-CV-5432	107.82.0	Nationwide Children's Hospital	22	HNSC	E7A75507-0422-4465-A11D-A12E52C2EBF6	12	TCGA	2016	Not Available	Not Available	Larynx	TCGA-CV-5432	d89b1fd6-bef4-4803-8ed3-3b442be600b6	23	-25006		0	3930	3930																								Not Available	NOT HISPANIC OR LATINO	Not Available	Not Available	Not Available
TCGA-CV-5434-01A-01R-1686-07	Tumor	TCGA-CV-5434	107.82.0	Nationwide Children's Hospital	22	HNSC	0572C0AB-E975-4940-8451-38BC69CE1A29	12	TCGA	2016	NO	Not Available	Larynx	TCGA-CV-5434	dbe29e97-f111-41d3-a25f-3b9eb9bb099f	23	-22182	3314	0		3295	TCGA-CV-5434-D18711;TCGA-CV-5434-D20814	2c7bc42d-27b0-4197-bdb1-346666fd7fc8;db6629f8-e29a-4987-ac4a-89fbb505b4af	Not Available;Not Available	9;23	3259;3259	3246;3246	Carboplatin;Paclitaxel	Not Available;Not Available	11;1	2;2	Not Available;Not Available	Not Available;Not Available	RECURRENCE;RECURRENCE	Not Applicable;Not Applicable	Not Available;Not Available	IV;IV	NO;NO	Chemotherapy;Chemotherapy	Not Available;Not Available	Not Available;Not Available	Not Available;Not Available	Not Available;Not Available	2011;2012	Not Available	NOT HISPANIC OR LATINO	YES	YES	YES
TCGA-CV-5435-01A-01R-1686-07	Tumor	TCGA-CV-5435	107.82.0	Nationwide Children's Hospital	22	HNSC	3D203CF7-25AA-4B9D-BE01-5CF0FB96F14E	12	TCGA	2016	YES	Not Available	Larynx	TCGA-CV-5435	cc23a09b-bca7-43e0-9ad0-bf272848492e	23	-20926	2319	0	1438	1704	TCGA-CV-5435-D18710;TCGA-CV-5435-D20816;TCGA-CV-5435-D20817	f790bfb0-ab34-4f22-8049-efddc91cfcc8;cda8bb55-d9e7-48a5-a6ac-a2f3bcf2f11f;a02667c2-f716-40fb-9134-1af1ff3317a9	Not Available;Not Available;Not Available	9;23;23	63;336;336	28;305;305	Carboplatinum;Carboplatinum;Paclitaxel	Not Available;Not Available;Not Available	11;1;1	2;Not Available;Not Available	Not Available;Not Available;Not Available	Not Available;Not Available;Not Available	ADJUVANT;RECURRENCE;RECURRENCE	Not Applicable;Not Applicable;Not Applicable	Not Available;Not Available;Not Available	IV;IV;IV	NO;NO;NO	Chemotherapy;Chemotherapy;Chemotherapy	Not Available;Not Available;Not Available	Not Available;Not Available;Not Available	Not Available;Not Available;Not Available	Not Available;Not Available;Not Available	2011;2012;2012	Not Available	NOT HISPANIC OR LATINO	YES	NO	NO
TCGA-CV-5436-01A-01R-1514-07	Tumor	TCGA-CV-5436	83.86.0	Nationwide Children's Hospital	22	HNSC	C5857E90-091A-45A0-9D93-D54182AE7D39	12	TCGA	2016	YES	12	Floor of mouth	TCGA-CV-5436	94a47bf8-f673-45cb-a8d3-1031317d03b3	30	-23923	584	0	584	548																								Not Available	HISPANIC OR LATINO	NO	NO	NO
TCGA-CV-5439-01A-01R-1686-07	Tumor	TCGA-CV-5439	107.82.0	Nationwide Children's Hospital	22	HNSC	160C402E-76AA-4C91-93FB-E1C9CC7E0364	12	TCGA	2016	YES	Not Available	Base of tongue	TCGA-CV-5439	3ee863da-7991-414f-82d8-2b6502d4c061	23	-22686	546	0	546	501	TCGA-CV-5439-D18426;TCGA-CV-5439-D20815	f249dc8f-d9c5-421b-912e-4035f6958f41;b5acfad2-1ead-413a-9d5d-71187daf570b	Not Available;Not Available	14;23	345;440	231;378	Carboplatinum;IRESSA	Not Available;Not Available	11;1	6;2	Not Available;Not Available	Not Available;Not Available	RECURRENCE;PALLIATIVE	Not Applicable;Not Applicable	Not Available;Not Available	IV;PO	NO;NO	Chemotherapy;Chemotherapy	Not Available;Not Available	Not Available;Not Available	Not Available;Not Available	Not Available;Not Available	2011;2012	Not Available	NOT HISPANIC OR LATINO	YES	NO	NO
TCGA-CV-5440-01A-01R-1514-07	Tumor	TCGA-CV-5440	83.86.0	Nationwide Children's Hospital	22	HNSC	80F981D3-A513-4139-84FB-0B72952206C7	12	TCGA	2016	YES	1	Larynx	TCGA-CV-5440	10d0a058-3e5e-4916-84c4-25f934b96f86	30	-19197		0	2732	2732	TCGA-CV-5440-D18428	59F71D6C-9A07-4851-86B3-CFC6CAEB4F8E	Not Available	4	Not Available	19	Palixtaxel	Not Available	11	Not Available	Not Available	Not Available	ADJUVANT	Not Applicable	Unknown	IV	YES	Chemotherapy	Not Available	Not Available	Not Available	Not Available	2011	Not Available	NOT HISPANIC OR LATINO	NO	NO	NO
TCGA-CV-5441-01A-01R-1514-07	Tumor	TCGA-CV-5441	83.86.0	Nationwide Children's Hospital	22	HNSC	C1DE82FA-0D0E-4771-9249-35D258255927	12	TCGA	2016	YES	6	Larynx	TCGA-CV-5441	c72ae014-3c05-47f9-8615-6633467bc532	30	-21305		0	2663	Not Available																								Not Available	NOT HISPANIC OR LATINO	NO	NO	NO
TCGA-CV-5442-01A-01R-1514-07	Tumor	TCGA-CV-5442	83.86.0	Nationwide Children's Hospital	22	HNSC	D8340821-FBEC-4AA1-8075-B86F02B88057	12	TCGA	2016	NO	Not Available	Hard Palate	TCGA-CV-5442	3c975b68-4a6e-4c97-a8d1-b9a427d4957c	30	-28040		0	2327	Not Available																								Not Available	NOT HISPANIC OR LATINO	NO	NO	NO
TCGA-CV-5443-01A-01R-1514-07	Tumor	TCGA-CV-5443	83.86.0	Nationwide Children's Hospital	22	HNSC	3D13FC46-6F98-44C6-B9AF-99BD0261541E	12	TCGA	2016	YES	Not Available	Larynx	TCGA-CV-5443	180036a2-3b56-405e-a1fe-d5932517b6c7	30	-23287		0	2567	2567																								Not Available	NOT HISPANIC OR LATINO	NO	NO	NO
TCGA-CV-5444-01A-02R-1514-07	Tumor	TCGA-CV-5444	83.86.0	Nationwide Children's Hospital	22	HNSC	16F9EC58-01B7-44FF-B391-33200F2B4287	12	TCGA	2016	YES	2	Larynx	TCGA-CV-5444	4eacd173-025a-442b-8bce-890ccfdca586	30	-23650		0	1969	1969																								Not Available	NOT HISPANIC OR LATINO	NO	NO	NO
TCGA-CV-5966-01A-11R-1686-07	Tumor	TCGA-CV-5966	107.82.0	Nationwide Children's Hospital	22	HNSC	661BD4E6-4BD4-49E3-8879-46BE4715E520	12	TCGA	2016	YES	2	Oral Cavity	TCGA-CV-5966	0d0731e2-8d82-4b6d-9258-2896a770a868	12	-23119	545	0		Not Available																								Not Available	NOT HISPANIC OR LATINO
TCGA-CV-5970-01A-11R-1686-07	Tumor	TCGA-CV-5970	107.82.0	Nationwide Children's Hospital	22	HNSC	381B3593-827C-401F-89B6-D83FF0290EDC	12	TCGA	2016	YES	Not Available	Oral Tongue	TCGA-CV-5970	1f6167d9-c99d-4873-8d6e-e62a1c964135	12	-21890	406	0	406	406																								Not Available	HISPANIC OR LATINO
TCGA-CV-5971-01A-11R-1686-07	Tumor	TCGA-CV-5971	107.82.0	Nationwide Children's Hospital	22	HNSC	3BF6E793-58A8-49C7-9493-43C09E600EA3	12	TCGA	2016	YES	Not Available	Oral Tongue	TCGA-CV-5971	1465b7ec-8d2b-47dd-8387-977eed44cc86	12	-22279		0	540	540																								Not Available	NOT HISPANIC OR LATINO	Not Available	Not Available	Not Available
TCGA-CV-5973-01A-11R-1686-07	Tumor	TCGA-CV-5973	107.82.0	Nationwide Children's Hospital	22	HNSC	EFB7CD2C-6799-48A9-8EF0-B665F439D1C6	12	TCGA	2016	NO	Not Available	Oral Tongue	TCGA-CV-5973	8fc1f1be-d2d5-4b3a-9973-f4d964018beb	12	-22771		0	1737	Not Available																								Not Available	NOT HISPANIC OR LATINO
TCGA-CV-5976-01A-11R-1686-07	Tumor	TCGA-CV-5976	107.82.0	Nationwide Children's Hospital	22	HNSC	6A86B6CB-E18A-49EB-93FD-BDF21FA4DA58	12	TCGA	2016	YES	Not Available	Oral Tongue	TCGA-CV-5976	23062172-7361-4e61-8ee6-b0a613d72a24	12	-18267		0	1478	1478																								Not Available	NOT HISPANIC OR LATINO
TCGA-CV-5977-01A-11R-1686-07	Tumor	TCGA-CV-5977	107.82.0	Nationwide Children's Hospital	22	HNSC	C7E1DAD0-C34E-4F28-A391-47B4EF6A3A79	12	TCGA	2016	YES	6	Oral Tongue	TCGA-CV-5977	50239d1d-b3a4-4240-ab83-b24ba67b1299	12	-24115		0	1007	Not Available																								Not Available	NOT HISPANIC OR LATINO
TCGA-CV-5978-01A-11R-1686-07	Tumor	TCGA-CV-5978	107.82.0	Nationwide Children's Hospital	22	HNSC	5E9654FB-0265-40BB-9CB6-3D623FB1350F	12	TCGA	2016	YES	Not Available	Larynx	TCGA-CV-5978	e16e9535-b20f-4c9a-8b5b-82df80c99448	12	-19480	215	0	215	215																								Not Available	NOT HISPANIC OR LATINO
TCGA-CV-5979-01A-11R-1686-07	Tumor	TCGA-CV-5979	107.82.0	Nationwide Children's Hospital	22	HNSC	E70E7086-8CC2-47E0-8952-CE510A3EB63C	12	TCGA	2016	YES	Not Available	Oral Tongue	TCGA-CV-5979	1e05fdbd-c80b-41c6-9b40-8a7200c92e76	12	-9567		0	1315	1315																								Not Available	NOT HISPANIC OR LATINO	NO	NO	Not Available
TCGA-CV-6003-01A-11R-1686-07	Tumor	TCGA-CV-6003	107.82.0	Nationwide Children's Hospital	22	HNSC	AB808564-6044-4084-91F8-9D023538AB80	12	TCGA	2016	YES	12	Oral Tongue	TCGA-CV-6003	417b357e-c90e-4b63-ae7a-4b782038ffd3	12	-18600		0	1246	1246																								Not Available	NOT HISPANIC OR LATINO
TCGA-CV-6433-01A-11R-1686-07	Tumor	TCGA-CV-6433	107.82.0	Nationwide Children's Hospital	22	HNSC	E09EE2DB-FD15-4AC8-874D-D8B6C1B8BCA5	12	TCGA	2016	YES	4	Oral Tongue	TCGA-CV-6433	d5eedfb5-4fa3-4a1e-ad0d-ea550b22a5ba	13	-20855		0	405	405																								Not Available	NOT HISPANIC OR LATINO	NO	NO	NO
TCGA-CV-6436-01A-11R-1686-07	Tumor	TCGA-CV-6436	107.82.0	Nationwide Children's Hospital	22	HNSC	5326364A-AEC1-4A2B-ADE9-E554C64C485F	12	TCGA	2016	NO	Not Available	Oral Tongue	TCGA-CV-6436	84fd72d1-f79d-493b-a341-826acd4aa942	13	-22885		0	743	Not Available																								Not Available	NOT HISPANIC OR LATINO
TCGA-CV-6441-01A-11R-1686-07	Tumor	TCGA-CV-6441	107.82.0	Nationwide Children's Hospital	22	HNSC	20229E53-8096-454C-B733-D35718844605	12	TCGA	2016	YES	Not Available	Oral Tongue	TCGA-CV-6441	59398d50-45cf-4812-a24e-0c00c0199971	13	-22025	292	0		Not Available																								Not Available	HISPANIC OR LATINO
TCGA-CV-6933-01A-11R-1915-07	Tumor	TCGA-CV-6933	151.75.0	Nationwide Children's Hospital	22	HNSC	47E5C552-7BAF-47D2-A6FE-5EC312B4AFF7	12	TCGA	2016	YES	0	Oral Tongue	TCGA-CV-6933	2a749317-0156-4213-8482-b2c2d6e52e9b	9	-19518	2741	0		Not Available																								Not Available	NOT HISPANIC OR LATINO
TCGA-CV-6933-11A-01R-1915-07	Normal	TCGA-CV-6933	151.75.0	Nationwide Children's Hospital	22	HNSC	47E5C552-7BAF-47D2-A6FE-5EC312B4AFF7	12	TCGA	2016	YES	0	Oral Tongue	TCGA-CV-6933	2a749317-0156-4213-8482-b2c2d6e52e9b	9	-19518	2741	0		Not Available																								Not Available	NOT HISPANIC OR LATINO
TCGA-CV-6934-01A-11R-1915-07	Tumor	TCGA-CV-6934	151.75.0	Nationwide Children's Hospital	22	HNSC	7D56FA75-D9AB-4781-B831-41E9354C9EA0	12	TCGA	2016	NO	Not Available	Oral Tongue	TCGA-CV-6934	4f5bc340-bdb5-418a-b3c4-96ac85e08b34	13	-24180	65	0		Not Available																								Not Available	NOT HISPANIC OR LATINO
TCGA-CV-6934-11A-01R-1915-07	Normal	TCGA-CV-6934	151.75.0	Nationwide Children's Hospital	22	HNSC	7D56FA75-D9AB-4781-B831-41E9354C9EA0	12	TCGA	2016	NO	Not Available	Oral Tongue	TCGA-CV-6934	4f5bc340-bdb5-418a-b3c4-96ac85e08b34	13	-24180	65	0		Not Available																								Not Available	NOT HISPANIC OR LATINO
TCGA-CV-6935-01A-11R-1915-07	Tumor	TCGA-CV-6935	151.75.0	Nationwide Children's Hospital	22	HNSC	321CC2DD-E7B5-4491-B42C-4214E55A1B5C	12	TCGA	2016	YES	0	Larynx	TCGA-CV-6935	0871333c-1088-4af1-a365-12256643c5bd	9	-24799	295	0		Not Available																								Not Available	NOT HISPANIC OR LATINO
TCGA-CV-6935-11A-01R-1915-07	Normal	TCGA-CV-6935	151.75.0	Nationwide Children's Hospital	22	HNSC	321CC2DD-E7B5-4491-B42C-4214E55A1B5C	12	TCGA	2016	YES	0	Larynx	TCGA-CV-6935	0871333c-1088-4af1-a365-12256643c5bd	9	-24799	295	0		Not Available																								Not Available	NOT HISPANIC OR LATINO
TCGA-CV-6936-01A-11R-1915-07	Tumor	TCGA-CV-6936	151.75.0	Nationwide Children's Hospital	22	HNSC	B10E096E-A5D7-4865-8719-49764DA96967	12	TCGA	2016	YES	0	Floor of mouth	TCGA-CV-6936	93a265b7-6c23-4e5f-b797-c117793744bf	13	-25020	166	0		Not Available																								Not Available	NOT HISPANIC OR LATINO
TCGA-CV-6936-11A-01R-1915-07	Normal	TCGA-CV-6936	151.75.0	Nationwide Children's Hospital	22	HNSC	B10E096E-A5D7-4865-8719-49764DA96967	12	TCGA	2016	YES	0	Floor of mouth	TCGA-CV-6936	93a265b7-6c23-4e5f-b797-c117793744bf	13	-25020	166	0		Not Available																								Not Available	NOT HISPANIC OR LATINO
TCGA-CV-6937-01A-11R-2016-07	Tumor	TCGA-CV-6937	164.84.0	Nationwide Children's Hospital	22	HNSC	655B2B82-1686-419B-8488-814C724BF4C9	12	TCGA	2016	NO	Not Available	Oral Cavity	TCGA-CV-6937	f3a592bc-40c6-4453-9008-630b073e5e8c	13	-26156	624	0		Not Available																								Not Available	NOT HISPANIC OR LATINO
TCGA-CV-6938-01A-11R-1915-07	Tumor	TCGA-CV-6938	151.75.0	Nationwide Children's Hospital	22	HNSC	C98408CA-206E-4257-BFF2-B4058787D9AA	12	TCGA	2016	NO	Not Available	Oral Cavity	TCGA-CV-6938	ff9db03d-f81c-4079-8b05-f5a8c05b8cfe	13	-31825	144	0		Not Available																								Not Available	NOT HISPANIC OR LATINO
TCGA-CV-6938-11A-01R-1915-07	Normal	TCGA-CV-6938	151.75.0	Nationwide Children's Hospital	22	HNSC	C98408CA-206E-4257-BFF2-B4058787D9AA	12	TCGA	2016	NO	Not Available	Oral Cavity	TCGA-CV-6938	ff9db03d-f81c-4079-8b05-f5a8c05b8cfe	13	-31825	144	0		Not Available																								Not Available	NOT HISPANIC OR LATINO
TCGA-CV-6939-01A-11R-1915-07	Tumor	TCGA-CV-6939	151.75.0	Nationwide Children's Hospital	22	HNSC	EE650CAA-17C2-4920-9C1C-B46DBE782A5F	12	TCGA	2016	NO	Not Available	Oral Tongue	TCGA-CV-6939	e7d1f0dd-eec0-4670-a2ba-00ffe38c6382	13	-21947	666	0		Not Available																								Not Available	Not Available
TCGA-CV-6939-11A-01R-1915-07	Normal	TCGA-CV-6939	151.75.0	Nationwide Children's Hospital	22	HNSC	EE650CAA-17C2-4920-9C1C-B46DBE782A5F	12	TCGA	2016	NO	Not Available	Oral Tongue	TCGA-CV-6939	e7d1f0dd-eec0-4670-a2ba-00ffe38c6382	13	-21947	666	0		Not Available																								Not Available	Not Available
TCGA-CV-6940-01A-11R-1915-07	Tumor	TCGA-CV-6940	151.75.0	Nationwide Children's Hospital	22	HNSC	28E55BBD-8576-4EAA-B85F-BB841182DC64	12	TCGA	2016	NO	Not Available	Buccal Mucosa	TCGA-CV-6940	8b6e939c-c4b0-4d1e-a92c-ea998bc5d36a	13	-29382	804	0		Not Available																								Not Available	NOT HISPANIC OR LATINO
TCGA-CV-6941-01A-11R-1915-07	Tumor	TCGA-CV-6941	151.75.0	Nationwide Children's Hospital	22	HNSC	0B7D13D1-3084-4EC9-A611-C9796DC2150E	12	TCGA	2016	YES	Not Available	Oral Tongue	TCGA-CV-6941	ea93555b-daa5-439a-a13a-796917365454	9	-18812	342	0		Not Available																								Not Available	NOT HISPANIC OR LATINO
TCGA-CV-6942-01A-21R-2016-07	Tumor	TCGA-CV-6942	164.84.0	Nationwide Children's Hospital	22	HNSC	BCED347D-5E6C-447F-A79B-CB2E558788DC	12	TCGA	2016	NO	Not Available	Oral Cavity	TCGA-CV-6942	2bc1522c-b8c7-4f62-9338-d4b56a7ba6c6	11	-26941		0	3835	Not Available																								Not Available	HISPANIC OR LATINO
TCGA-CV-6943-01A-11R-1915-07	Tumor	TCGA-CV-6943	151.75.0	Nationwide Children's Hospital	22	HNSC	F1515B43-6685-4EBC-87F8-C156BF0F76C2	12	TCGA	2016	YES	5	Base of tongue	TCGA-CV-6943	8b574abc-646b-4252-8eb7-b9c737d034d9	9	-27310	602	0		Not Available																								Not Available	NOT HISPANIC OR LATINO
TCGA-CV-6943-11A-01R-1915-07	Normal	TCGA-CV-6943	151.75.0	Nationwide Children's Hospital	22	HNSC	F1515B43-6685-4EBC-87F8-C156BF0F76C2	12	TCGA	2016	YES	5	Base of tongue	TCGA-CV-6943	8b574abc-646b-4252-8eb7-b9c737d034d9	9	-27310	602	0		Not Available																								Not Available	NOT HISPANIC OR LATINO
TCGA-CV-6945-01A-11R-1915-07	Tumor	TCGA-CV-6945	151.75.0	Nationwide Children's Hospital	22	HNSC	55F68775-E27E-41BE-8D5C-E7DFE2E3581E	12	TCGA	2016	YES	Not Available	Oral Tongue	TCGA-CV-6945	15714e69-e075-4688-8f51-c7102fe4ca07	9	-15158	366	0		Not Available																								Not Available	NOT HISPANIC OR LATINO
TCGA-CV-6948-01A-11R-1915-07	Tumor	TCGA-CV-6948	151.75.0	Nationwide Children's Hospital	22	HNSC	80AD3A92-B1D2-4445-B7BE-95040EFDA187	12	TCGA	2016	NO	Not Available	Floor of mouth	TCGA-CV-6948	fcf0dc48-b889-4593-a15b-aa715aae7bf5	25	-29153	1289	0		Not Available																								Not Available	NOT HISPANIC OR LATINO
TCGA-CV-6950-01A-11R-1915-07	Tumor	TCGA-CV-6950	151.75.0	Nationwide Children's Hospital	22	HNSC	B3C7F7FD-1CAF-4360-AD79-867844C5F819	12	TCGA	2016	YES	5	Base of tongue	TCGA-CV-6950	32128246-1258-43d1-b1e5-30ae63822c32	8	-23549	459	0		Not Available																								Not Available	NOT HISPANIC OR LATINO
TCGA-CV-6951-01A-11R-1915-07	Tumor	TCGA-CV-6951	151.75.0	Nationwide Children's Hospital	22	HNSC	D1B461C0-883F-4984-8F56-A2657E1F2BA7	12	TCGA	2016	YES	2	Oral Tongue	TCGA-CV-6951	91728cd6-ed91-49dc-9279-faedbe211a9d	8	-21166	915	0		Not Available																								Not Available	NOT HISPANIC OR LATINO
TCGA-CV-6952-01A-11R-1915-07	Tumor	TCGA-CV-6952	151.75.0	Nationwide Children's Hospital	22	HNSC	AED9F24C-9497-45CB-9273-1515542EFB46	12	TCGA	2016	YES	3	Oral Tongue	TCGA-CV-6952	7ed006e8-461f-4664-bfff-55fa6812743c	12	-23892	185	0		Not Available																								Not Available	NOT HISPANIC OR LATINO
TCGA-CV-6953-01A-11R-1915-07	Tumor	TCGA-CV-6953	151.75.0	Nationwide Children's Hospital	22	HNSC	C84107AF-653E-4596-90CD-C92EDF7864E6	12	TCGA	2016	NO	Not Available	Floor of mouth	TCGA-CV-6953	a4e90f64-d11a-4278-a79e-d64c936e8e86	8	-29465	1641	0		Not Available																								Not Available	NOT HISPANIC OR LATINO
TCGA-CV-6954-01A-11R-1915-07	Tumor	TCGA-CV-6954	151.75.0	Nationwide Children's Hospital	22	HNSC	51C75BF0-D001-42D7-B5D8-9CB122C4ADB1	12	TCGA	2016	YES	3	Oral Tongue	TCGA-CV-6954	402fd96c-76d3-4ac2-9f64-77bd34be0adb	8	-21557	2002	0		Not Available																								Not Available	Not Available
TCGA-CV-6955-01A-11R-2016-07	Tumor	TCGA-CV-6955	164.84.0	Nationwide Children's Hospital	22	HNSC	BDFCA434-A5C9-406C-A654-C8733254E2B9	12	TCGA	2016	NO	Not Available	Oral Cavity	TCGA-CV-6955	f3ee1127-ed53-43e8-825e-1e5516371054	11	-27261	334	0		Not Available																								Not Available	NOT HISPANIC OR LATINO
TCGA-CV-6955-11A-01R-2016-07	Normal	TCGA-CV-6955	164.84.0	Nationwide Children's Hospital	22	HNSC	BDFCA434-A5C9-406C-A654-C8733254E2B9	12	TCGA	2016	NO	Not Available	Oral Cavity	TCGA-CV-6955	f3ee1127-ed53-43e8-825e-1e5516371054	11	-27261	334	0		Not Available																								Not Available	NOT HISPANIC OR LATINO
TCGA-CV-6956-01A-21R-2016-07	Tumor	TCGA-CV-6956	164.84.0	Nationwide Children's Hospital	22	HNSC	BED1B00C-F55C-4F2B-805F-1C7F8A2A6D24	12	TCGA	2016	YES	Not Available	Oral Tongue	TCGA-CV-6956	8c238d30-df8e-4e6b-98fc-21696269a294	11	-24720	217	0		Not Available																								Not Available	HISPANIC OR LATINO
TCGA-CV-6956-11A-01R-2016-07	Normal	TCGA-CV-6956	164.84.0	Nationwide Children's Hospital	22	HNSC	BED1B00C-F55C-4F2B-805F-1C7F8A2A6D24	12	TCGA	2016	YES	Not Available	Oral Tongue	TCGA-CV-6956	8c238d30-df8e-4e6b-98fc-21696269a294	11	-24720	217	0		Not Available																								Not Available	HISPANIC OR LATINO
TCGA-CV-6959-01A-11R-1915-07	Tumor	TCGA-CV-6959	151.75.0	Nationwide Children's Hospital	22	HNSC	C94153B8-84D1-4144-96FB-F4012B98C3EC	12	TCGA	2016	YES	1	Oral Tongue	TCGA-CV-6959	ef3ce0e5-d2e8-4616-8b1a-a78c591cf235	8	-17679	256	0		Not Available																								Not Available	NOT HISPANIC OR LATINO
TCGA-CV-6959-11A-01R-1915-07	Normal	TCGA-CV-6959	151.75.0	Nationwide Children's Hospital	22	HNSC	C94153B8-84D1-4144-96FB-F4012B98C3EC	12	TCGA	2016	YES	1	Oral Tongue	TCGA-CV-6959	ef3ce0e5-d2e8-4616-8b1a-a78c591cf235	8	-17679	256	0		Not Available																								Not Available	NOT HISPANIC OR LATINO
TCGA-CV-6960-01A-41R-2016-07	Tumor	TCGA-CV-6960	164.84.0	Nationwide Children's Hospital	22	HNSC	25A2FAFD-DB65-49C1-AE5C-349799C69276	12	TCGA	2016	YES	2	Oral Cavity	TCGA-CV-6960	2c985b30-0f8f-4c8f-a924-cc6aad7ebf0d	8	-18194	862	0		Not Available																								Not Available	Not Available
TCGA-CV-6960-11A-01R-2016-07	Normal	TCGA-CV-6960	164.84.0	Nationwide Children's Hospital	22	HNSC	25A2FAFD-DB65-49C1-AE5C-349799C69276	12	TCGA	2016	YES	2	Oral Cavity	TCGA-CV-6960	2c985b30-0f8f-4c8f-a924-cc6aad7ebf0d	8	-18194	862	0		Not Available																								Not Available	Not Available
TCGA-CV-6961-01A-21R-1915-07	Tumor	TCGA-CV-6961	151.75.0	Nationwide Children's Hospital	22	HNSC	66EA976A-B570-4481-AE8C-C146973FE7DD	12	TCGA	2016	YES	2	Oral Tongue	TCGA-CV-6961	4075717b-2240-4842-a00a-0c4dbcb910c4	12	-22532	76	0		Not Available																								Not Available	NOT HISPANIC OR LATINO
TCGA-CV-6961-11A-01R-1915-07	Normal	TCGA-CV-6961	151.75.0	Nationwide Children's Hospital	22	HNSC	66EA976A-B570-4481-AE8C-C146973FE7DD	12	TCGA	2016	YES	2	Oral Tongue	TCGA-CV-6961	4075717b-2240-4842-a00a-0c4dbcb910c4	12	-22532	76	0		Not Available																								Not Available	NOT HISPANIC OR LATINO
TCGA-CV-6962-01A-11R-1915-07	Tumor	TCGA-CV-6962	151.75.0	Nationwide Children's Hospital	22	HNSC	9F8B0D74-D900-49B6-A622-BB15F178E87B	12	TCGA	2016	NO	Not Available	Larynx	TCGA-CV-6962	9bcf4ed8-bfb4-49aa-a37e-d91325926894	25	-24103	126	0		Not Available																								Not Available	HISPANIC OR LATINO
TCGA-CV-6962-11A-01R-1915-07	Normal	TCGA-CV-6962	151.75.0	Nationwide Children's Hospital	22	HNSC	9F8B0D74-D900-49B6-A622-BB15F178E87B	12	TCGA	2016	NO	Not Available	Larynx	TCGA-CV-6962	9bcf4ed8-bfb4-49aa-a37e-d91325926894	25	-24103	126	0		Not Available																								Not Available	HISPANIC OR LATINO
TCGA-CV-7089-01A-11R-2016-07	Tumor	TCGA-CV-7089	164.84.0	Nationwide Children's Hospital	22	HNSC	D622D705-1919-4EA2-812B-03D7963DC0E2	12	TCGA	2016	YES	0	Larynx	TCGA-CV-7089	490950f3-2d1a-4174-a30d-b8f5654ff316	11	-27149	1972	0		Not Available																								Not Available	NOT HISPANIC OR LATINO
TCGA-CV-7090-01A-11R-2016-07	Tumor	TCGA-CV-7090	164.84.0	Nationwide Children's Hospital	22	HNSC	16FAABBE-8B62-4C05-9C41-4EC8821993A6	12	TCGA	2016	NO	Not Available	Oral Cavity	TCGA-CV-7090	05fbd98c-28bd-41bc-ae60-16ac0c16c723	11	-14515		0	3837	Not Available																								Not Available	NOT HISPANIC OR LATINO
TCGA-CV-7091-01A-11R-2016-07	Tumor	TCGA-CV-7091	164.84.0	Nationwide Children's Hospital	22	HNSC	BA21366E-A05E-4B34-9C83-612F2F5E2782	12	TCGA	2016	YES	3	Oral Cavity	TCGA-CV-7091	2a192049-6435-49ab-8444-ddeb2b9ee774	11	-19938		0	3381	Not Available																								Not Available	NOT HISPANIC OR LATINO
TCGA-CV-7091-11A-01R-2016-07	Normal	TCGA-CV-7091	164.84.0	Nationwide Children's Hospital	22	HNSC	BA21366E-A05E-4B34-9C83-612F2F5E2782	12	TCGA	2016	YES	3	Oral Cavity	TCGA-CV-7091	2a192049-6435-49ab-8444-ddeb2b9ee774	11	-19938		0	3381	Not Available																								Not Available	NOT HISPANIC OR LATINO
TCGA-CV-7095-01A-21R-2016-07	Tumor	TCGA-CV-7095	164.84.0	Nationwide Children's Hospital	22	HNSC	C8E33BB6-C766-4D8D-BA7F-ACEC86270ACE	12	TCGA	2016	NO	Not Available	Oral Cavity	TCGA-CV-7095	d7d49895-032f-4385-8b68-ae16f8675ca7	5	-32022	572	0		Not Available																								Not Available	HISPANIC OR LATINO
TCGA-CV-7097-01A-11R-2016-07	Tumor	TCGA-CV-7097	164.84.0	Nationwide Children's Hospital	22	HNSC	304BD46A-F658-49DC-A5E1-5C6C77365EF9	12	TCGA	2016	YES	03	Oral Cavity	TCGA-CV-7097	9d0f5938-6a01-4c06-8536-dff834f7f2f9	5	-19382	385	0		Not Available																								Not Available	NOT HISPANIC OR LATINO
TCGA-CV-7097-11A-01R-2016-07	Normal	TCGA-CV-7097	164.84.0	Nationwide Children's Hospital	22	HNSC	304BD46A-F658-49DC-A5E1-5C6C77365EF9	12	TCGA	2016	YES	03	Oral Cavity	TCGA-CV-7097	9d0f5938-6a01-4c06-8536-dff834f7f2f9	5	-19382	385	0		Not Available																								Not Available	NOT HISPANIC OR LATINO
TCGA-CV-7099-01A-41R-2016-07	Tumor	TCGA-CV-7099	164.84.0	Nationwide Children's Hospital	22	HNSC	6D0BEA68-415C-4BDB-A123-B76FE992AABE	12	TCGA	2016	NO	Not Available	Oral Cavity	TCGA-CV-7099	57212fda-fd32-4328-81dc-61f167970f89	6	-31134	243	0		Not Available																								Not Available	Not Available
TCGA-CV-7100-01A-11R-2016-07	Tumor	TCGA-CV-7100	164.84.0	Nationwide Children's Hospital	22	HNSC	838504B7-1DB4-44D3-B6A9-A9601595E868	12	TCGA	2016	NO	Not Available	Oral Cavity	TCGA-CV-7100	90a8d2cb-1f31-45f9-8575-eed3cb9a7798	6	-24183	274	0		Not Available																								Not Available	Not Available
TCGA-CV-7101-01A-11R-2016-07	Tumor	TCGA-CV-7101	164.84.0	Nationwide Children's Hospital	22	HNSC	CAF4EC23-C1A1-4BCA-93F7-9FAB60067ED1	12	TCGA	2016	YES	3	Larynx	TCGA-CV-7101	241d9310-9137-42dd-b28d-0dc50c44cb43	6	-29550	160	0		Not Available																								Not Available	NOT HISPANIC OR LATINO
TCGA-CV-7101-11A-01R-2016-07	Normal	TCGA-CV-7101	164.84.0	Nationwide Children's Hospital	22	HNSC	CAF4EC23-C1A1-4BCA-93F7-9FAB60067ED1	12	TCGA	2016	YES	3	Larynx	TCGA-CV-7101	241d9310-9137-42dd-b28d-0dc50c44cb43	6	-29550	160	0		Not Available																								Not Available	NOT HISPANIC OR LATINO
TCGA-CV-7102-01A-11R-2016-07	Tumor	TCGA-CV-7102	164.84.0	Nationwide Children's Hospital	22	HNSC	FE99F38B-E35A-4D40-BCAF-6286A79789E4	12	TCGA	2016	YES	1	Floor of mouth	TCGA-CV-7102	5a976335-2326-46f0-abf1-29b744da1f43	6	-27805	56	0		Not Available																								Not Available	NOT HISPANIC OR LATINO
TCGA-CV-7103-01A-21R-2016-07	Tumor	TCGA-CV-7103	164.84.0	Nationwide Children's Hospital	22	HNSC	FB01B779-DB07-4E3B-AD6E-3209006BA9F1	12	TCGA	2016	YES	3	Oral Tongue	TCGA-CV-7103	1dd23cd6-3aa8-4553-8813-04701451846e	11	-18219	1591	0		Not Available																								Not Available	NOT HISPANIC OR LATINO
TCGA-CV-7103-11A-01R-2016-07	Normal	TCGA-CV-7103	164.84.0	Nationwide Children's Hospital	22	HNSC	FB01B779-DB07-4E3B-AD6E-3209006BA9F1	12	TCGA	2016	YES	3	Oral Tongue	TCGA-CV-7103	1dd23cd6-3aa8-4553-8813-04701451846e	11	-18219	1591	0		Not Available																								Not Available	NOT HISPANIC OR LATINO
TCGA-CV-7104-01A-11R-2016-07	Tumor	TCGA-CV-7104	164.84.0	Nationwide Children's Hospital	22	HNSC	1DDE2BEC-F61F-4727-95B3-DB444A1F3523	12	TCGA	2016	NO	Not Available	Oral Tongue	TCGA-CV-7104	aa34f900-b2e4-4276-9d28-807ad11444ac	11	-22349	393	0		Not Available																								Not Available	NOT HISPANIC OR LATINO
TCGA-CV-7177-01A-11R-2016-07	Tumor	TCGA-CV-7177	164.84.0	Nationwide Children's Hospital	22	HNSC	3D62B431-A0BD-45FE-A6BC-80D0C7154417	12	TCGA	2016	NO	Not Available	Larynx	TCGA-CV-7177	c539274c-e2bf-4b5f-ab56-35eff1569bac	11	-30180	663	0		Not Available																								Not Available	NOT HISPANIC OR LATINO
TCGA-CV-7177-11A-01R-2016-07	Normal	TCGA-CV-7177	164.84.0	Nationwide Children's Hospital	22	HNSC	3D62B431-A0BD-45FE-A6BC-80D0C7154417	12	TCGA	2016	NO	Not Available	Larynx	TCGA-CV-7177	c539274c-e2bf-4b5f-ab56-35eff1569bac	11	-30180	663	0		Not Available																								Not Available	NOT HISPANIC OR LATINO
TCGA-CV-7178-01A-21R-2016-07	Tumor	TCGA-CV-7178	164.84.0	Nationwide Children's Hospital	22	HNSC	A833B217-960B-4540-B6E8-00B7D4A35A3B	12	TCGA	2016	YES	0	Oral Cavity	TCGA-CV-7178	8f044599-3fbe-4b69-b67d-49aee9168545	11	-23430	2166	0		Not Available																								Not Available	NOT HISPANIC OR LATINO
TCGA-CV-7178-11A-01R-2016-07	Normal	TCGA-CV-7178	164.84.0	Nationwide Children's Hospital	22	HNSC	A833B217-960B-4540-B6E8-00B7D4A35A3B	12	TCGA	2016	YES	0	Oral Cavity	TCGA-CV-7178	8f044599-3fbe-4b69-b67d-49aee9168545	11	-23430	2166	0		Not Available																								Not Available	NOT HISPANIC OR LATINO
TCGA-CV-7180-01A-11R-2016-07	Tumor	TCGA-CV-7180	164.84.0	Nationwide Children's Hospital	22	HNSC	439799B0-2056-49C9-A7B5-81215DCBEC84	12	TCGA	2016	YES	6	Oral Tongue	TCGA-CV-7180	d2ca9a4d-c14c-40c0-871c-88794a02e4aa	11	-12523	327	0		Not Available																								Not Available	NOT HISPANIC OR LATINO
TCGA-CV-7183-01A-11R-2016-07	Tumor	TCGA-CV-7183	164.84.0	Nationwide Children's Hospital	22	HNSC	54712FBE-84C9-4C2C-82D8-C9632EDA40DE	12	TCGA	2016	NO	Not Available	Oral Cavity	TCGA-CV-7183	de206681-3e27-4d4f-8669-aefb12b5b1e3	11	-19358		0	3497	Not Available																								Not Available	NOT HISPANIC OR LATINO
TCGA-CV-7183-11A-01R-2016-07	Normal	TCGA-CV-7183	164.84.0	Nationwide Children's Hospital	22	HNSC	54712FBE-84C9-4C2C-82D8-C9632EDA40DE	12	TCGA	2016	NO	Not Available	Oral Cavity	TCGA-CV-7183	de206681-3e27-4d4f-8669-aefb12b5b1e3	11	-19358		0	3497	Not Available																								Not Available	NOT HISPANIC OR LATINO
TCGA-CV-7235-01A-11R-2016-07	Tumor	TCGA-CV-7235	164.84.0	Nationwide Children's Hospital	22	HNSC	58CAC4BA-37DA-493C-883D-4FEBB5986802	12	TCGA	2016	YES	4	Floor of mouth	TCGA-CV-7235	2fbafcc5-896c-4e50-8956-a61540fc89be	12	-24800		0	1724	Not Available																								Not Available	NOT HISPANIC OR LATINO
TCGA-CV-7235-11A-01R-2016-07	Normal	TCGA-CV-7235	164.84.0	Nationwide Children's Hospital	22	HNSC	58CAC4BA-37DA-493C-883D-4FEBB5986802	12	TCGA	2016	YES	4	Floor of mouth	TCGA-CV-7235	2fbafcc5-896c-4e50-8956-a61540fc89be	12	-24800		0	1724	Not Available																								Not Available	NOT HISPANIC OR LATINO
TCGA-CV-7236-01A-11R-2016-07	Tumor	TCGA-CV-7236	164.84.0	Nationwide Children's Hospital	22	HNSC	2F18DDD4-9219-4F52-8B91-3A04503217DA	12	TCGA	2016	NO	Not Available	Oral Tongue	TCGA-CV-7236	38cfe5af-02e4-4271-8978-8e2566d3dca7	2	-28250	144	0		Not Available																								Not Available	NOT HISPANIC OR LATINO
TCGA-CV-7238-01A-11R-2016-07	Tumor	TCGA-CV-7238	164.84.0	Nationwide Children's Hospital	22	HNSC	DAD93B95-1C18-4CD2-8A89-D7481CCD2E5C	12	TCGA	2016	NO	Not Available	Oral Tongue	TCGA-CV-7238	78fcc813-d0a8-44aa-b004-62810dca9d12	5	-25471		0	1444	Not Available																								Not Available	NOT HISPANIC OR LATINO
TCGA-CV-7238-11A-01R-2016-07	Normal	TCGA-CV-7238	164.84.0	Nationwide Children's Hospital	22	HNSC	DAD93B95-1C18-4CD2-8A89-D7481CCD2E5C	12	TCGA	2016	NO	Not Available	Oral Tongue	TCGA-CV-7238	78fcc813-d0a8-44aa-b004-62810dca9d12	5	-25471		0	1444	Not Available																								Not Available	NOT HISPANIC OR LATINO
TCGA-CV-7242-01A-11R-2016-07	Tumor	TCGA-CV-7242	164.84.0	Nationwide Children's Hospital	22	HNSC	11C483B3-C4EF-4216-9F8E-0FFBD34A3F8E	12	TCGA	2016	YES	5	Larynx	TCGA-CV-7242	4b4247e2-4446-44f5-8573-4cea8bf69f8e	2	-22136		0	1095	Not Available																								Not Available	NOT HISPANIC OR LATINO
TCGA-CV-7242-11A-01R-2016-07	Normal	TCGA-CV-7242	164.84.0	Nationwide Children's Hospital	22	HNSC	11C483B3-C4EF-4216-9F8E-0FFBD34A3F8E	12	TCGA	2016	YES	5	Larynx	TCGA-CV-7242	4b4247e2-4446-44f5-8573-4cea8bf69f8e	2	-22136		0	1095	Not Available																								Not Available	NOT HISPANIC OR LATINO
TCGA-CV-7245-01A-11R-2016-07	Tumor	TCGA-CV-7245	164.84.0	Nationwide Children's Hospital	22	HNSC	A38C1C81-5E67-448A-BB10-B3E28F81539F	12	TCGA	2016	NO	Not Available	Larynx	TCGA-CV-7245	ae2051a3-f851-4cb3-af18-029f4574b179	2	-22646		0	797	Not Available																								Not Available	HISPANIC OR LATINO
TCGA-CV-7245-11A-01R-2016-07	Normal	TCGA-CV-7245	164.84.0	Nationwide Children's Hospital	22	HNSC	A38C1C81-5E67-448A-BB10-B3E28F81539F	12	TCGA	2016	NO	Not Available	Larynx	TCGA-CV-7245	ae2051a3-f851-4cb3-af18-029f4574b179	2	-22646		0	797	Not Available																								Not Available	HISPANIC OR LATINO
TCGA-CV-7247-01A-11R-2016-07	Tumor	TCGA-CV-7247	164.84.0	Nationwide Children's Hospital	22	HNSC	EE5334FB-5D12-4045-B480-D0549124FD28	12	TCGA	2016	NO	Not Available	Larynx	TCGA-CV-7247	5e25ab76-a8ab-4779-aa03-8de658f18da1	5	-20433	577	0		Not Available																								Not Available	NOT HISPANIC OR LATINO
TCGA-CV-7248-01A-11R-2016-07	Tumor	TCGA-CV-7248	164.84.0	Nationwide Children's Hospital	22	HNSC	D27FAFAD-2646-407C-AB88-9DFD36E52E3D	12	TCGA	2016	NO	Not Available	Larynx	TCGA-CV-7248	34227de4-d23c-46d6-b78b-49add24a4b88	2	-23082	521	0		Not Available																								Not Available	NOT HISPANIC OR LATINO
TCGA-CV-7250-01A-11R-2016-07	Tumor	TCGA-CV-7250	164.84.0	Nationwide Children's Hospital	22	HNSC	34396E3A-B464-4590-BE07-5B553F5D735A	12	TCGA	2016	YES	Not Available	Larynx	TCGA-CV-7250	0858c8b7-e2eb-4461-b65e-9d476029ad8d	5	-23489	2900	0		Not Available																								Not Available	NOT HISPANIC OR LATINO
TCGA-CV-7250-11A-01R-2016-07	Normal	TCGA-CV-7250	164.84.0	Nationwide Children's Hospital	22	HNSC	34396E3A-B464-4590-BE07-5B553F5D735A	12	TCGA	2016	YES	Not Available	Larynx	TCGA-CV-7250	0858c8b7-e2eb-4461-b65e-9d476029ad8d	5	-23489	2900	0		Not Available																								Not Available	NOT HISPANIC OR LATINO
TCGA-CV-7252-01A-11R-2016-07	Tumor	TCGA-CV-7252	164.84.0	Nationwide Children's Hospital	22	HNSC	2E5A0DCA-ADA1-45CD-9589-A6D400955BDC	12	TCGA	2016	NO	Not Available	Oral Cavity	TCGA-CV-7252	24ecbe19-a9ea-4215-a7f1-74300f9ed2a9	2	-22934	151	0		Not Available																								Not Available	NOT HISPANIC OR LATINO
TCGA-CV-7252-11A-01R-2016-07	Normal	TCGA-CV-7252	164.84.0	Nationwide Children's Hospital	22	HNSC	2E5A0DCA-ADA1-45CD-9589-A6D400955BDC	12	TCGA	2016	NO	Not Available	Oral Cavity	TCGA-CV-7252	24ecbe19-a9ea-4215-a7f1-74300f9ed2a9	2	-22934	151	0		Not Available																								Not Available	NOT HISPANIC OR LATINO
TCGA-CV-7253-01A-11R-2016-07	Tumor	TCGA-CV-7253	164.84.0	Nationwide Children's Hospital	22	HNSC	0C0F240C-5ECB-4E42-988C-2935669C3E7B	12	TCGA	2016	Not Available	Not Available	Oral Cavity	TCGA-CV-7253	d99f39f3-e85a-4073-b6ce-371ba76cea20	5	-21473	361	0		Not Available																								Not Available	NOT HISPANIC OR LATINO
TCGA-CV-7254-01A-11R-2016-07	Tumor	TCGA-CV-7254	164.84.0	Nationwide Children's Hospital	22	HNSC	5B15CB1C-7129-45C6-BC28-98FBE2D7B6AA	12	TCGA	2016	YES	6	Oral Cavity	TCGA-CV-7254	f4343626-f677-4fe5-862b-8fb4a16262bf	2	-20306	1459	0		Not Available																								Not Available	NOT HISPANIC OR LATINO
TCGA-CV-7255-01A-11R-2016-07	Tumor	TCGA-CV-7255	164.84.0	Nationwide Children's Hospital	22	HNSC	FD6BDB43-6ACF-4DC8-B812-E1F13A031D37	12	TCGA	2016	YES	Not Available	Oral Tongue	TCGA-CV-7255	534f85f2-b9eb-45be-87d5-c3dffd13d541	5	-11931	64	0		Not Available																								Not Available	NOT HISPANIC OR LATINO
TCGA-CV-7255-11A-01R-2016-07	Normal	TCGA-CV-7255	164.84.0	Nationwide Children's Hospital	22	HNSC	FD6BDB43-6ACF-4DC8-B812-E1F13A031D37	12	TCGA	2016	YES	Not Available	Oral Tongue	TCGA-CV-7255	534f85f2-b9eb-45be-87d5-c3dffd13d541	5	-11931	64	0		Not Available																								Not Available	NOT HISPANIC OR LATINO
TCGA-CV-7261-01A-11R-2016-07	Tumor	TCGA-CV-7261	164.84.0	Nationwide Children's Hospital	22	HNSC	F435137F-24ED-423C-92EA-6AB44D0CD4D1	12	TCGA	2016	NO	Not Available	Larynx	TCGA-CV-7261	55f96a9c-e2c8-4243-8a7e-94bc6fab73a6	2	-20992		0	1099	Not Available																								Not Available	NOT HISPANIC OR LATINO
TCGA-CV-7261-11A-01R-2016-07	Normal	TCGA-CV-7261	164.84.0	Nationwide Children's Hospital	22	HNSC	F435137F-24ED-423C-92EA-6AB44D0CD4D1	12	TCGA	2016	NO	Not Available	Larynx	TCGA-CV-7261	55f96a9c-e2c8-4243-8a7e-94bc6fab73a6	2	-20992		0	1099	Not Available																								Not Available	NOT HISPANIC OR LATINO
TCGA-CV-7263-01A-11R-2016-07	Tumor	TCGA-CV-7263	164.84.0	Nationwide Children's Hospital	22	HNSC	EC5F88BB-ECAC-4290-B902-8EB2F5AD5E9E	12	TCGA	2016	NO	Not Available	Oral Cavity	TCGA-CV-7263	93b742eb-5fc3-4ce2-b7f6-c89f97e0dcc9	5	-23513	560	0		Not Available																								Not Available	Not Available
TCGA-CV-7406-01A-11R-2081-07	Tumor	TCGA-CV-7406	188.78.0	Nationwide Children's Hospital	22	HNSC	3D2779D2-7436-422A-8702-CEE8F64685E0	12	TCGA	2016	YES	3	Base of tongue	TCGA-CV-7406	2c6d6c93-fb6d-47f7-a868-5e9a82c75d4c	9	-18250	1748	0		Not Available																								Not Available	NOT HISPANIC OR LATINO
TCGA-CV-7406-11A-01R-2081-07	Normal	TCGA-CV-7406	188.78.0	Nationwide Children's Hospital	22	HNSC	3D2779D2-7436-422A-8702-CEE8F64685E0	12	TCGA	2016	YES	3	Base of tongue	TCGA-CV-7406	2c6d6c93-fb6d-47f7-a868-5e9a82c75d4c	9	-18250	1748	0		Not Available																								Not Available	NOT HISPANIC OR LATINO
TCGA-CV-7407-01A-11R-2081-07	Tumor	TCGA-CV-7407	188.78.0	Nationwide Children's Hospital	22	HNSC	D58A7277-7ED2-4297-888A-0CFD738F3992	12	TCGA	2016	NO	Not Available	Floor of mouth	TCGA-CV-7407	8b63be59-9ce6-45a0-80d9-4d20f4918cb9	10	-24475	1081	0		Not Available																								Not Available	NOT HISPANIC OR LATINO
TCGA-CV-7410-01A-21R-2081-07	Tumor	TCGA-CV-7410	188.78.0	Nationwide Children's Hospital	22	HNSC	4C23755E-7433-4A39-BA1B-12B385C3E30A	12	TCGA	2016	NO	Not Available	Larynx	TCGA-CV-7410	06f0cf45-3840-44b2-bfc5-18eb980b8f68	9	-22302	6417	0		Not Available																								Not Available	NOT HISPANIC OR LATINO
TCGA-CV-7411-01A-11R-2081-07	Tumor	TCGA-CV-7411	188.78.0	Nationwide Children's Hospital	22	HNSC	6631BD62-B03F-4584-B372-33D5582C4E21	12	TCGA	2016	NO	Not Available	Oral Cavity	TCGA-CV-7411	600fc87b-a177-4bf9-9084-457f7e7e102c	13	-23696	2717	0		Not Available																								Not Available	NOT HISPANIC OR LATINO
TCGA-CV-7413-01A-11R-2081-07	Tumor	TCGA-CV-7413	188.78.0	Nationwide Children's Hospital	22	HNSC	9C10D0E0-DF8B-4B18-8B2C-8E927F745826	12	TCGA	2016	NO	Not Available	Oral Cavity	TCGA-CV-7413	b3342767-62bc-407f-8a83-5be50e3bdc3e	17	-27231	294	0		Not Available																								Not Available	NOT HISPANIC OR LATINO
TCGA-CV-7414-01A-11R-2081-07	Tumor	TCGA-CV-7414	188.78.0	Nationwide Children's Hospital	22	HNSC	83D4BE62-5885-4A82-8FFC-6DC3A0CFF472	12	TCGA	2016	NO	Not Available	Oral Cavity	TCGA-CV-7414	c3b2c38d-81a3-42fd-a41e-6f6de3934007	13	-28603	14	0		Not Available																								Not Available	NOT HISPANIC OR LATINO
TCGA-CV-7415-01A-11R-2081-07	Tumor	TCGA-CV-7415	188.78.0	Nationwide Children's Hospital	22	HNSC	342B59F4-B463-40DC-97CE-AD8D7A40DDEF	12	TCGA	2016	NO	Not Available	Larynx	TCGA-CV-7415	f22eac21-8a74-433a-b65c-3540d14a45cb	10	-22062	695	0		Not Available																								Not Available	NOT HISPANIC OR LATINO
TCGA-CV-7416-01A-11R-2081-07	Tumor	TCGA-CV-7416	188.78.0	Nationwide Children's Hospital	22	HNSC	21390A45-41C0-4997-8680-EF9FE5C2585D	12	TCGA	2016	Not Available	Not Available	Oral Cavity	TCGA-CV-7416	96415324-6859-41eb-8d07-be4e6f7d9781	31	-10936	763	0		Not Available	TCGA-CV-7416-D30340;TCGA-CV-7416-D30479	4f60858e-0dee-4741-8233-97c82f78fc23;d27d670c-8499-47eb-97a4-d36208c38885	Not Available;Not Available	10;11	334;334	334;Not Available	Cisplatin;Fluorouracil	Not Available;Not Available	4;4	Not Available;Not Available	Not Available;Not Available	Not Available;Not Available	Not Available;Not Available	Not Applicable;Not Applicable	Not Available;Not Available	Not Available;Not Available	NO;NO	Chemotherapy;Chemotherapy	Not Available;Not Available	Not Available;Not Available	Not Available;Not Available	NO;NO	2012;2012	Not Available	NOT HISPANIC OR LATINO
TCGA-CV-7416-11A-01R-2081-07	Normal	TCGA-CV-7416	188.78.0	Nationwide Children's Hospital	22	HNSC	21390A45-41C0-4997-8680-EF9FE5C2585D	12	TCGA	2016	Not Available	Not Available	Oral Cavity	TCGA-CV-7416	96415324-6859-41eb-8d07-be4e6f7d9781	31	-10936	763	0		Not Available	TCGA-CV-7416-D30340;TCGA-CV-7416-D30479	4f60858e-0dee-4741-8233-97c82f78fc23;d27d670c-8499-47eb-97a4-d36208c38885	Not Available;Not Available	10;11	334;334	334;Not Available	Cisplatin;Fluorouracil	Not Available;Not Available	4;4	Not Available;Not Available	Not Available;Not Available	Not Available;Not Available	Not Available;Not Available	Not Applicable;Not Applicable	Not Available;Not Available	Not Available;Not Available	NO;NO	Chemotherapy;Chemotherapy	Not Available;Not Available	Not Available;Not Available	Not Available;Not Available	NO;NO	2012;2012	Not Available	NOT HISPANIC OR LATINO
TCGA-CV-7418-01A-11R-2081-07	Tumor	TCGA-CV-7418	188.78.0	Nationwide Children's Hospital	22	HNSC	D8CB476E-D5DB-43C1-BC70-F0531102CDF6	12	TCGA	2016	YES	6	Larynx	TCGA-CV-7418	20ad4ac0-6a87-461f-83a5-fded51bf821a	10	-22805	789	0		Not Available																								Not Available	NOT HISPANIC OR LATINO
TCGA-CV-7421-01A-11R-2081-07	Tumor	TCGA-CV-7421	188.78.0	Nationwide Children's Hospital	22	HNSC	A0584B82-3C91-42C7-A75F-625A2B9561D7	12	TCGA	2016	NO	Not Available	Larynx	TCGA-CV-7421	e0acb3aa-4cb4-43c9-ae36-2213536666a6	13	-27961	2	0		Not Available																								Not Available	NOT HISPANIC OR LATINO
TCGA-CV-7422-01A-21R-2081-07	Tumor	TCGA-CV-7422	188.78.0	Nationwide Children's Hospital	22	HNSC	E22A4CEE-F232-4BD3-B58D-4F27F2E2A32B	12	TCGA	2016	YES	Not Available	Larynx	TCGA-CV-7422	2e73e016-61ff-4f23-9ca9-fd48d9050d82	10	-22098	1037	0		Not Available																								Not Available	NOT HISPANIC OR LATINO
TCGA-CV-7423-01A-11R-2081-07	Tumor	TCGA-CV-7423	188.78.0	Nationwide Children's Hospital	22	HNSC	D7353446-5240-4586-A162-7A7EDE71C336	12	TCGA	2016	NO	Not Available	Oral Cavity	TCGA-CV-7423	f3a626e4-2d93-4d13-a34c-de0e0c6118ac	13	-24071	3059	0		Not Available																								Not Available	NOT HISPANIC OR LATINO
TCGA-CV-7423-11A-01R-2081-07	Normal	TCGA-CV-7423	188.78.0	Nationwide Children's Hospital	22	HNSC	D7353446-5240-4586-A162-7A7EDE71C336	12	TCGA	2016	NO	Not Available	Oral Cavity	TCGA-CV-7423	f3a626e4-2d93-4d13-a34c-de0e0c6118ac	13	-24071	3059	0		Not Available																								Not Available	NOT HISPANIC OR LATINO
TCGA-CV-7424-01A-11R-2081-07	Tumor	TCGA-CV-7424	188.78.0	Nationwide Children's Hospital	22	HNSC	E4E947C2-2688-4B13-A9AB-2F5D2285077B	12	TCGA	2016	NO	Not Available	Larynx	TCGA-CV-7424	815119e3-13c4-4f63-98c7-10a519034a25	7	-24775	453	0		Not Available																								Not Available	NOT HISPANIC OR LATINO
TCGA-CV-7424-11A-01R-2081-07	Normal	TCGA-CV-7424	188.78.0	Nationwide Children's Hospital	22	HNSC	E4E947C2-2688-4B13-A9AB-2F5D2285077B	12	TCGA	2016	NO	Not Available	Larynx	TCGA-CV-7424	815119e3-13c4-4f63-98c7-10a519034a25	7	-24775	453	0		Not Available																								Not Available	NOT HISPANIC OR LATINO
TCGA-CV-7425-01A-11R-2081-07	Tumor	TCGA-CV-7425	188.78.0	Nationwide Children's Hospital	22	HNSC	E9D4D634-646C-4EFB-B175-5389751419D5	12	TCGA	2016	NO	Not Available	Oral Cavity	TCGA-CV-7425	d2e43b2d-2b28-441a-8f03-a43ae7dfc1ce	13	-28368	1718	0		Not Available																								Not Available	NOT HISPANIC OR LATINO
TCGA-CV-7425-11A-01R-2081-07	Normal	TCGA-CV-7425	188.78.0	Nationwide Children's Hospital	22	HNSC	E9D4D634-646C-4EFB-B175-5389751419D5	12	TCGA	2016	NO	Not Available	Oral Cavity	TCGA-CV-7425	d2e43b2d-2b28-441a-8f03-a43ae7dfc1ce	13	-28368	1718	0		Not Available																								Not Available	NOT HISPANIC OR LATINO
TCGA-CV-7427-01A-11R-2081-07	Tumor	TCGA-CV-7427	188.78.0	Nationwide Children's Hospital	22	HNSC	072F469A-2043-4CED-95E8-A41CBF7D5158	12	TCGA	2016	YES	1	Oral Cavity	TCGA-CV-7427	c2bbb6f9-6f88-4a58-a15a-b887dfad34b4	13	-26975	4760	0		Not Available																								Not Available	NOT HISPANIC OR LATINO
TCGA-CV-7428-01A-11R-2132-07	Tumor	TCGA-CV-7428	190.78.0	Nationwide Children's Hospital	22	HNSC	3E7A0EC1-5D11-448A-88DE-7D58F4841755	12	TCGA	2016	YES	3	Oral Cavity	TCGA-CV-7428	90d3c240-5cb6-4601-a852-b5cdfbcd6483	13	-17429	1671	0		Not Available																								Not Available	NOT HISPANIC OR LATINO
TCGA-CV-7429-01A-11R-2132-07	Tumor	TCGA-CV-7429	190.78.0	Nationwide Children's Hospital	22	HNSC	41E6A3EE-54CC-4716-AB0B-7BD51EA3109B	12	TCGA	2016	YES	Not Available	Oral Cavity	TCGA-CV-7429	44d99f11-ef5b-45d7-b7df-b5c5893d878f	13	-20188	107	0		Not Available																								Not Available	NOT HISPANIC OR LATINO
TCGA-CV-7430-01A-11R-2132-07	Tumor	TCGA-CV-7430	190.78.0	Nationwide Children's Hospital	22	HNSC	EE9FA00A-4588-46DE-A312-68B31773D746	12	TCGA	2016	NO	Not Available	Larynx	TCGA-CV-7430	df132eb8-174b-4427-a16b-953e0f28bf2f	13	-20763	495	0		Not Available																								Not Available	NOT HISPANIC OR LATINO
TCGA-CV-7432-01A-11R-2132-07	Tumor	TCGA-CV-7432	190.78.0	Nationwide Children's Hospital	22	HNSC	165A8654-913C-4A12-9EFF-3AE9C7DAE89B	12	TCGA	2016	NO	Not Available	Oral Cavity	TCGA-CV-7432	eaf674dd-9909-4879-b9a3-74253169eddd	13	-28875	2570	0		Not Available																								Not Available	NOT HISPANIC OR LATINO
TCGA-CV-7432-11A-01R-2132-07	Normal	TCGA-CV-7432	190.78.0	Nationwide Children's Hospital	22	HNSC	165A8654-913C-4A12-9EFF-3AE9C7DAE89B	12	TCGA	2016	NO	Not Available	Oral Cavity	TCGA-CV-7432	eaf674dd-9909-4879-b9a3-74253169eddd	13	-28875	2570	0		Not Available																								Not Available	NOT HISPANIC OR LATINO
TCGA-CV-7433-01A-11R-2132-07	Tumor	TCGA-CV-7433	190.78.0	Nationwide Children's Hospital	22	HNSC	5B222926-8459-442D-90C7-21E45BA257EE	12	TCGA	2016	NO	Not Available	Larynx	TCGA-CV-7433	c9c33b2a-bf99-4563-a220-01a5dbe3be92	13	-18004	601	0		Not Available																								Not Available	NOT HISPANIC OR LATINO
TCGA-CV-7434-01A-11R-2132-07	Tumor	TCGA-CV-7434	190.78.0	Nationwide Children's Hospital	22	HNSC	2F4C6EF8-0146-4BED-9536-3E69DCF5FA91	12	TCGA	2016	YES	1	Oral Cavity	TCGA-CV-7434	63b50e1c-7948-464f-bff1-8e0e5daafcc5	13	-23465	218	0		Not Available																								Not Available	NOT HISPANIC OR LATINO
TCGA-CV-7434-11A-01R-2132-07	Normal	TCGA-CV-7434	190.78.0	Nationwide Children's Hospital	22	HNSC	2F4C6EF8-0146-4BED-9536-3E69DCF5FA91	12	TCGA	2016	YES	1	Oral Cavity	TCGA-CV-7434	63b50e1c-7948-464f-bff1-8e0e5daafcc5	13	-23465	218	0		Not Available																								Not Available	NOT HISPANIC OR LATINO
TCGA-CV-7435-01A-11R-2132-07	Tumor	TCGA-CV-7435	190.78.0	Nationwide Children's Hospital	22	HNSC	06DB41A5-127B-4CA7-B758-CEE9647E1E4C	12	TCGA	2016	NO	Not Available	Oral Cavity	TCGA-CV-7435	65ba24fb-07df-47ce-91c4-677684b64cf4	13	-21049		0	4335	Not Available																								Not Available	NOT HISPANIC OR LATINO
TCGA-CV-7437-01A-21R-2132-07	Tumor	TCGA-CV-7437	190.78.0	Nationwide Children's Hospital	22	HNSC	D9C0C30C-C27A-4704-A1D8-16C8606D0064	12	TCGA	2016	NO	Not Available	Larynx	TCGA-CV-7437	a4cb2c52-15e2-45c8-aff9-23339217d167	9	-28221	506	0		Not Available																								Not Available	Not Available
TCGA-CV-7437-11A-01R-2132-07	Normal	TCGA-CV-7437	190.78.0	Nationwide Children's Hospital	22	HNSC	D9C0C30C-C27A-4704-A1D8-16C8606D0064	12	TCGA	2016	NO	Not Available	Larynx	TCGA-CV-7437	a4cb2c52-15e2-45c8-aff9-23339217d167	9	-28221	506	0		Not Available																								Not Available	Not Available
TCGA-CV-7438-01A-21R-2132-07	Tumor	TCGA-CV-7438	190.78.0	Nationwide Children's Hospital	22	HNSC	832D43F3-380F-4D94-AFAE-6CF62CEB65EA	12	TCGA	2016	NO	Not Available	Oral Tongue	TCGA-CV-7438	08a45833-16a3-4a57-a310-307ec086e558	13	-32021	194	0		Not Available																								Not Available	NOT HISPANIC OR LATINO
TCGA-CV-7438-11A-01R-2132-07	Normal	TCGA-CV-7438	190.78.0	Nationwide Children's Hospital	22	HNSC	832D43F3-380F-4D94-AFAE-6CF62CEB65EA	12	TCGA	2016	NO	Not Available	Oral Tongue	TCGA-CV-7438	08a45833-16a3-4a57-a310-307ec086e558	13	-32021	194	0		Not Available																								Not Available	NOT HISPANIC OR LATINO
TCGA-CV-7440-01A-11R-2132-07	Tumor	TCGA-CV-7440	190.78.0	Nationwide Children's Hospital	22	HNSC	FB494017-E5C8-4329-BDAC-CF21FD744A0A	12	TCGA	2016	NO	Not Available	Larynx	TCGA-CV-7440	6715b957-0d48-439c-8cd7-bd9b204d39b0	9	-13992	675	0		Not Available																								Not Available	NOT HISPANIC OR LATINO
TCGA-CV-7440-11A-01R-2187-07	Normal	TCGA-CV-7440	190.78.0	Nationwide Children's Hospital	22	HNSC	FB494017-E5C8-4329-BDAC-CF21FD744A0A	12	TCGA	2016	NO	Not Available	Larynx	TCGA-CV-7440	6715b957-0d48-439c-8cd7-bd9b204d39b0	9	-13992	675	0		Not Available																								Not Available	NOT HISPANIC OR LATINO
TCGA-CV-7446-01A-11R-2232-07	Tumor	TCGA-CV-7446	190.78.0	Nationwide Children's Hospital	22	HNSC	C9AB900E-946D-4141-AB31-579DCBE1591F	12	TCGA	2016	YES	1	Oral Tongue	TCGA-CV-7446	c4ad0479-8bef-4876-b423-fe83f222a60a	13	-24170	1093	0		Not Available																								Not Available	NOT HISPANIC OR LATINO
TCGA-CV-7568-01A-11R-2232-07	Tumor	TCGA-CV-7568	190.78.0	Nationwide Children's Hospital	22	HNSC	39668EAB-5B78-4B77-9686-0C8BAA10E332	12	TCGA	2016	NO	Not Available	Oral Cavity	TCGA-CV-7568	fa2d4258-3ee4-4d53-8ef2-9700b5cf38d6	9	-17670	927	0		Not Available																								Not Available	NOT HISPANIC OR LATINO
TCGA-CV-A45O-01A-21R-A24H-07	Tumor	TCGA-CV-A45O	260.56.0	Nationwide Children's Hospital	22	HNSC	25527AF4-6051-47FF-AB11-0DE162515A28	12	TCGA	2016	NO	Not Available	Alveolar Ridge	TCGA-CV-A45O	9E3E8014-04D4-40D8-B2DF-53C770E01DF2	22	-20868		0	851	Not Available																								Not Available	NOT HISPANIC OR LATINO
TCGA-CV-A45P-01A-11R-A24H-07	Tumor	TCGA-CV-A45P	260.56.0	Nationwide Children's Hospital	22	HNSC	0EE62D15-DE66-481B-97B6-42B6CFC28D5C	12	TCGA	2016	NO	Not Available	Oral Tongue	TCGA-CV-A45P	1C509BA7-2EDF-4428-BD39-109C78B3FB30	22	-30297		0	639	Not Available																								Not Available	NOT HISPANIC OR LATINO
TCGA-CV-A45Q-01A-11R-A24H-07	Tumor	TCGA-CV-A45Q	260.56.0	Nationwide Children's Hospital	22	HNSC	FED9B6EC-9E7E-4F24-BC37-952E401C7C9E	12	TCGA	2016	NO	Not Available	Oral Cavity	TCGA-CV-A45Q	650310FF-B75E-40D2-BB8D-80E4EFA36B2A	22	-25379	5152	0		Not Available																								Not Available	NOT HISPANIC OR LATINO
TCGA-CV-A45R-01A-11R-A24H-07	Tumor	TCGA-CV-A45R	260.56.0	Nationwide Children's Hospital	22	HNSC	5656425B-ABE1-464D-9778-26AF9E419092	12	TCGA	2016	YES	Not Available	Oral Tongue	TCGA-CV-A45R	9180E195-DAE9-4AF9-90CF-71778BC9AEFC	19	-17125		0	5480	Not Available																								Not Available	HISPANIC OR LATINO
TCGA-CV-A45T-01A-11R-A24H-07	Tumor	TCGA-CV-A45T	260.56.0	Nationwide Children's Hospital	22	HNSC	3B8AF709-919A-48F9-A07B-38B86E789303	12	TCGA	2016	YES	Not Available	Oral Tongue	TCGA-CV-A45T	837BF19D-1E02-4C3D-9E65-8999F0652020	15	-23452	4856	0		Not Available																								Not Available	NOT HISPANIC OR LATINO
TCGA-CV-A45U-01A-12R-A24H-07	Tumor	TCGA-CV-A45U	260.56.0	Nationwide Children's Hospital	22	HNSC	E3DB3B12-95A5-4A3C-9A70-24EC6891C222	12	TCGA	2016	YES	Not Available	Oral Cavity	TCGA-CV-A45U	7CABCC66-F159-42DC-BD79-953BFFD93B8D	20	-21746	1079	0		Not Available																								Not Available	NOT HISPANIC OR LATINO
TCGA-CV-A45V-01A-21R-A24Z-07	Tumor	TCGA-CV-A45V	265.56.0	Nationwide Children's Hospital	22	HNSC	C9139139-6668-4124-806F-51D9F73421E8	12	TCGA	2016	NO	Not Available	Oral Cavity	TCGA-CV-A45V	9413432E-24FE-428A-B464-1A5BCDBF5F74	22	-31936	32	0		Not Available																								Not Available	NOT HISPANIC OR LATINO
TCGA-CV-A45W-01A-11R-A24Z-07	Tumor	TCGA-CV-A45W	265.56.0	Nationwide Children's Hospital	22	HNSC	7F6E8463-C74D-4641-B746-0E2B66387139	12	TCGA	2016	YES	Not Available	Larynx	TCGA-CV-A45W	2D74E19E-9677-491F-B9EA-4874DB64747A	14	-27743	1398	0		Not Available																								Not Available	NOT HISPANIC OR LATINO
TCGA-CV-A45X-01A-21R-A24Z-07	Tumor	TCGA-CV-A45X	265.56.0	Nationwide Children's Hospital	22	HNSC	11E14D44-8EB4-4FE7-898C-F2691B54C22E	12	TCGA	2016	YES	Not Available	Floor of mouth	TCGA-CV-A45X	3101785D-1CC2-4BD9-9FCE-02205D0548C6	13	-17464	198	0		Not Available																								Not Available	NOT HISPANIC OR LATINO
TCGA-CV-A45Y-01A-11R-A24Z-07	Tumor	TCGA-CV-A45Y	265.56.0	Nationwide Children's Hospital	22	HNSC	99553E8E-C4BF-4F3C-8AC4-05D8BC3DD414	12	TCGA	2016	YES	Not Available	Larynx	TCGA-CV-A45Y	468061C2-0ACB-4F67-A357-99CCBD81A8B7	23	-22442	2703	0		Not Available																								Not Available	HISPANIC OR LATINO
TCGA-CV-A45Z-01A-21R-A24Z-07	Tumor	TCGA-CV-A45Z	265.56.0	Nationwide Children's Hospital	22	HNSC	060F9808-64A0-4219-A261-40B8E14EEFEF	12	TCGA	2016	YES	Not Available	Larynx	TCGA-CV-A45Z	E7174299-3CA7-4D51-9048-3EF3EFDE4E5C	14	-27397	1466	0		Not Available																								Not Available	NOT HISPANIC OR LATINO
TCGA-CV-A460-01A-21R-A24Z-07	Tumor	TCGA-CV-A460	265.56.0	Nationwide Children's Hospital	22	HNSC	CCE15E34-C425-4D27-947F-D2774A1AB314	12	TCGA	2016	NO	Not Available	Larynx	TCGA-CV-A460	E08FF4F7-62FD-4240-9E8B-C3AD7A9B2C44	23	-26539	1838	0		Not Available																								Not Available	NOT HISPANIC OR LATINO
TCGA-CV-A461-01A-41R-A266-07	Tumor	TCGA-CV-A461	273.58.0	Nationwide Children's Hospital	22	HNSC	2860CB60-C42B-447D-9DB4-901E7C79A5C9	12	TCGA	2016	NO	Not Available	Larynx	TCGA-CV-A461	3CF77E08-EA34-4091-B242-75C7E35FF699	21	-23955	2064	0		Not Available																								Not Available	NOT HISPANIC OR LATINO
TCGA-CV-A463-01A-11R-A266-07	Tumor	TCGA-CV-A463	273.58.0	Nationwide Children's Hospital	22	HNSC	42ECD914-DDC3-43DA-B87B-D1F9491FC0A9	12	TCGA	2016	NO	Not Available	Floor of mouth	TCGA-CV-A463	FA9F6B24-16B4-4DDA-ACCE-BF2E186D365D	22	-30095	23	0		Not Available																								Not Available	HISPANIC OR LATINO
TCGA-CV-A464-01A-11R-A266-07	Tumor	TCGA-CV-A464	273.58.0	Nationwide Children's Hospital	22	HNSC	7B7202F9-6D7A-4BDC-BE28-1199114170CF	12	TCGA	2016	YES	Not Available	Buccal Mucosa	TCGA-CV-A464	27707915-D36E-4DA7-9B39-2FDD9CE0BDC5	20	-17669		0	1722	Not Available																								Not Available	NOT HISPANIC OR LATINO
TCGA-CV-A465-01A-11R-A266-07	Tumor	TCGA-CV-A465	273.58.0	Nationwide Children's Hospital	22	HNSC	1E51B34D-0FCA-4901-A34A-2D7F4A7BE3E8	12	TCGA	2016	NO	Not Available	Oral Tongue	TCGA-CV-A465	6F8B9C64-16F1-4CD0-9CD6-A3C27D311CF8	22	-9015	215	0		Not Available																								Not Available	HISPANIC OR LATINO
TCGA-CV-A468-01A-11R-A266-07	Tumor	TCGA-CV-A468	273.58.0	Nationwide Children's Hospital	22	HNSC	AF5CD8D2-BD5A-4D7E-9715-5A1867F8F80C	12	TCGA	2016	YES	Not Available	Lip	TCGA-CV-A468	1C801A6B-8407-46DA-B6CC-245F05418B9E	21	-15372	464	0		Not Available																								Not Available	HISPANIC OR LATINO
TCGA-CV-A6JD-01A-11R-A31N-07	Tumor	TCGA-CV-A6JD	318.55.0	Nationwide Children's Hospital	22	HNSC	7D33A557-68F7-40CB-83EA-63185BBAA5F0	12	TCGA	2016	NO	Not Available	Floor of mouth	TCGA-CV-A6JD	432FBB6C-331F-4D2D-834D-F6378D88107A	16	-29988	182	0		Not Available																								Not Available	NOT HISPANIC OR LATINO
TCGA-CV-A6JE-01A-11R-A31N-07	Tumor	TCGA-CV-A6JE	318.55.0	Nationwide Children's Hospital	22	HNSC	38577978-75BA-41EB-B055-235B1FD384FB	12	TCGA	2016	YES	3	Oral Cavity	TCGA-CV-A6JE	E48C1481-E35C-49F9-9D13-A5D4085CF876	16	-28658		0	750	Not Available																								Not Available	NOT HISPANIC OR LATINO
TCGA-CV-A6JM-01A-11R-A31N-07	Tumor	TCGA-CV-A6JM	318.55.0	Nationwide Children's Hospital	22	HNSC	50B2C3F9-3F05-4B11-9F12-57F7B4107F0C	12	TCGA	2016	NO	Not Available	Hypopharynx	TCGA-CV-A6JM	08C95E8F-AA2F-4163-AC43-096053EC6886	17	-31147	194	0		Not Available																								Not Available	NOT HISPANIC OR LATINO
TCGA-CV-A6JN-01A-11R-A31N-07	Tumor	TCGA-CV-A6JN	318.55.0	Nationwide Children's Hospital	22	HNSC	8EE6F57F-95FE-4D23-8140-4569D99AC9B7	12	TCGA	2016	YES	8	Oral Cavity	TCGA-CV-A6JN	10593E5B-7ACB-498B-BDF7-705E3E2BC443	21	-19635		0	717	Not Available																								Not Available	NOT HISPANIC OR LATINO
TCGA-CV-A6JO-01B-11R-A34R-07	Tumor	TCGA-CV-A6JO	355.48.0	Nationwide Children's Hospital	22	HNSC	B859432D-AD7D-4D5D-AE85-F3CC1F1E300F	12	TCGA	2016	NO	Not Available	Oral Tongue	TCGA-CV-A6JO	865C624A-D52D-4C53-9904-40014CB8CCE7	6	-25377	197	0		Not Available																								Not Available	NOT HISPANIC OR LATINO
TCGA-CV-A6JT-01A-11R-A31N-07	Tumor	TCGA-CV-A6JT	318.55.0	Nationwide Children's Hospital	22	HNSC	5E7E2F5A-2BBA-404C-BAC8-E7286A12E715	12	TCGA	2016	NO	Not Available	Oral Tongue	TCGA-CV-A6JT	6A82A217-F7A2-4697-98A6-6C6553E8FAC1	12	-23806		0	670	Not Available																								Not Available	NOT HISPANIC OR LATINO
TCGA-CV-A6JU-01A-11R-A31N-07	Tumor	TCGA-CV-A6JU	318.55.0	Nationwide Children's Hospital	22	HNSC	36C8048B-7CF5-48A6-BEF2-235ED5B62597	12	TCGA	2016	YES	12	Oral Tongue	TCGA-CV-A6JU	B1B3983D-37D2-4BEF-BD17-708E3E600146	13	-22591		0	110	Not Available																								Not Available	NOT HISPANIC OR LATINO
TCGA-CV-A6JY-01A-11R-A31N-07	Tumor	TCGA-CV-A6JY	318.55.0	Nationwide Children's Hospital	22	HNSC	6AB6BE67-C20C-410E-B781-36DEE247D53C	12	TCGA	2016	YES	Not Available	Oral Cavity	TCGA-CV-A6JY	0625DF42-740F-4E52-8F9E-0F5B7DEE251B	13	-25321		0	646	Not Available																								Not Available	NOT HISPANIC OR LATINO
TCGA-CV-A6JZ-01A-11R-A31N-07	Tumor	TCGA-CV-A6JZ	318.55.0	Nationwide Children's Hospital	22	HNSC	6C7EE64C-D574-4323-B99F-9B46E7A0ECDD	12	TCGA	2016	YES	4	Oral Cavity	TCGA-CV-A6JZ	4CACFF9D-CC50-43A5-A227-16923ADA7467	16	-25182		0	680	Not Available																								Not Available	NOT HISPANIC OR LATINO
TCGA-CV-A6K0-01B-21R-A31N-07	Tumor	TCGA-CV-A6K0	318.55.0	Nationwide Children's Hospital	22	HNSC	3894893E-3DAF-4EE3-B47B-8D4E7DD8C10A	12	TCGA	2016	YES	1	Oral Tongue	TCGA-CV-A6K0	D5E136FD-B6FC-4400-88D3-30D10CBD9801	16	-21488		0	606	Not Available																								Not Available	NOT HISPANIC OR LATINO
TCGA-CV-A6K1-01A-11R-A31N-07	Tumor	TCGA-CV-A6K1	318.55.0	Nationwide Children's Hospital	22	HNSC	B536FB1D-E667-4499-98C5-D67718FFAC33	12	TCGA	2016	YES	6	Larynx	TCGA-CV-A6K1	3FB3D96E-85EF-4071-A220-2382F8D9DE82	16	-23848		0	527	Not Available																								Not Available	NOT HISPANIC OR LATINO
TCGA-CV-A6K2-01A-11R-A31N-07	Tumor	TCGA-CV-A6K2	318.55.0	Nationwide Children's Hospital	22	HNSC	10D6E2E2-613B-4EDE-983E-D167F7468785	12	TCGA	2016	YES	7	Oral Cavity	TCGA-CV-A6K2	A1066AEA-3122-4887-83D0-132EF84C06E1	17	-29114	317	0		Not Available																								Not Available	NOT HISPANIC OR LATINO
TCGA-CX-7082-01A-11R-2016-07	Tumor	TCGA-CX-7082	164.84.0	Nationwide Children's Hospital	22	HNSC	89C551F5-7B6D-475A-A5CF-5048F3C4E276	12	TCGA	2016	YES	0	Oral Cavity	TCGA-CX-7082	47d1fcaf-3c01-43ba-9a21-0870b4ea2976	1	-30174	11	0		Not Available																								Not Available	NOT HISPANIC OR LATINO
TCGA-CX-7085-01A-21R-2016-07	Tumor	TCGA-CX-7085	164.84.0	Nationwide Children's Hospital	22	HNSC	4BC6C3F6-0A70-4C11-8AC6-E271CED1213F	12	TCGA	2016	YES	0	Oral Tongue	TCGA-CX-7085	2a7b4613-f908-4e78-98ed-857dcd7ed774	1	-28221		0	15	Not Available																								Not Available	NOT HISPANIC OR LATINO
TCGA-CX-7086-01A-11R-2081-07	Tumor	TCGA-CX-7086	188.78.0	Nationwide Children's Hospital	22	HNSC	883DCFAD-24D4-4AD6-B76A-926031F63662	12	TCGA	2016	YES	7	Floor of mouth	TCGA-CX-7086	ad6c9d09-2c03-4786-a72d-dd2aa5f603d4	1	-19434		0	237	Not Available																								Not Available	NOT HISPANIC OR LATINO
TCGA-CX-7219-01A-11R-2016-07	Tumor	TCGA-CX-7219	164.84.0	Nationwide Children's Hospital	22	HNSC	EA4278A4-F439-41B4-B50C-391B2DF0079A	12	TCGA	2016	YES	12	Floor of mouth	TCGA-CX-7219	3ce5b304-6068-43ba-9e70-e4357d6d7a2a	1	-17222		0	828	Not Available																								Not Available	NOT HISPANIC OR LATINO
TCGA-CX-A4AQ-01A-11R-A24Z-07	Tumor	TCGA-CX-A4AQ	265.56.0	Nationwide Children's Hospital	22	HNSC	4EC368E5-7F92-4F11-AAAA-B45D9607F7FB	12	TCGA	2016	YES	1	Floor of mouth	TCGA-CX-A4AQ	18334157-AA38-4859-A786-99A920A1FBE3	31	-20709		0	1555	Not Available																								Unknown	NOT HISPANIC OR LATINO
TCGA-D6-6515-01A-21R-1873-07	Tumor	TCGA-D6-6515	145.84.0	Nationwide Children's Hospital	22	HNSC	FE0984F7-D9A9-4D2F-A64E-6F889598A97B	12	TCGA	2016	NO	Not Available	Oral Tongue	TCGA-D6-6515	8e0e456e-85ee-4de5-8f0b-72393d6acde0	5	-30099	403	0		Not Available																								Not Available	NOT HISPANIC OR LATINO	NO	NO	YES
TCGA-D6-6516-01A-11R-1873-07	Tumor	TCGA-D6-6516	145.84.0	Nationwide Children's Hospital	22	HNSC	EE6F80BD-4C97-484F-9C55-7F33FBAE5B53	12	TCGA	2016	NO	Not Available	Lip	TCGA-D6-6516	e4733700-ff23-43ff-bfa0-e679ce9352c9	22	-25242		0	325	Not Available																								Not Available	NOT HISPANIC OR LATINO	NO	NO	Not Available
TCGA-D6-6517-01A-11R-1873-07	Tumor	TCGA-D6-6517	145.84.0	Nationwide Children's Hospital	22	HNSC	8DCA8BDA-D290-47D0-A254-3C155F4BD31D	12	TCGA	2016	YES	3	Larynx	TCGA-D6-6517	ebe99910-e9f2-43dc-ad57-ac2f610b60c8	22	-21791		0	250	Not Available	TCGA-D6-6517-D29512	7b7ee260-cb0f-4a84-b653-a73cd161391b	Not Available	21	257	194	methotrexate	Not Available	3	8	8	mg	PROGRESSION	Not Applicable	Not Available	IV	NO	Chemotherapy	Not Available	62.8	mg	Not Available	2012	Not Available	NOT HISPANIC OR LATINO	YES	YES	NO
TCGA-D6-6823-01A-11R-1915-07	Tumor	TCGA-D6-6823	151.75.0	Nationwide Children's Hospital	22	HNSC	CAA6D1D6-3EE5-48ED-9CCE-44E7535AD0AF	12	TCGA	2016	YES	1	Oral Tongue	TCGA-D6-6823	fbdab01c-191c-4aef-9451-ca3afec55fa1	7	-18611		0	605	Not Available																								Not Available	NOT HISPANIC OR LATINO	NO	NO	Not Available
TCGA-D6-6824-01A-11R-1915-07	Tumor	TCGA-D6-6824	151.75.0	Nationwide Children's Hospital	22	HNSC	33785F96-CC4B-4B5C-8EFD-251B647CE8FC	12	TCGA	2016	YES	1	Larynx	TCGA-D6-6824	63f6a127-e4e8-4e1c-8236-a2adb9594c8f	7	-22633		0	77	Not Available																								Not Available	NOT HISPANIC OR LATINO	NO	NO	Not Available
TCGA-D6-6825-01A-21R-1915-07	Tumor	TCGA-D6-6825	151.75.0	Nationwide Children's Hospital	22	HNSC	68A9541C-4884-4FDD-B42A-F0B2FC4B1EBE	12	TCGA	2016	YES	2	Oral Tongue	TCGA-D6-6825	42bc2336-2408-441a-83b9-aadc9700f750	7	-26976		0	153	Not Available																								Not Available	NOT HISPANIC OR LATINO	Not Available	Not Available	Not Available
TCGA-D6-6826-01A-11R-1915-07	Tumor	TCGA-D6-6826	151.75.0	Nationwide Children's Hospital	22	HNSC	5500893F-DD3B-40CE-8110-019B1D7ED294	12	TCGA	2016	NO	Not Available	Larynx	TCGA-D6-6826	31243867-8e9f-46e9-a213-b83544eb8028	7	-23722		0	154	Not Available																								Not Available	NOT HISPANIC OR LATINO	Not Available	Not Available	Not Available
TCGA-D6-6827-01A-11R-1915-07	Tumor	TCGA-D6-6827	151.75.0	Nationwide Children's Hospital	22	HNSC	6B18D512-9E24-40E2-A1F6-71A59AF4DE46	12	TCGA	2016	NO	Not Available	Lip	TCGA-D6-6827	3c5bc678-41e9-46b3-9686-5cd95659ab71	7	-20175		0	128	Not Available																								Not Available	NOT HISPANIC OR LATINO	NO	NO	Not Available
TCGA-D6-8568-01A-11R-2403-07	Tumor	TCGA-D6-8568	241.67.0	Nationwide Children's Hospital	22	HNSC	227AB79C-B614-4AF6-9DEF-5F264AA10017	12	TCGA	2016	YES	5	Larynx	TCGA-D6-8568	5ed786f3-1d15-4079-bb8f-2f34ef305644	23	-22796		0	106	Not Available																								Not Available	NOT HISPANIC OR LATINO
TCGA-D6-8569-01A-11R-2403-07	Tumor	TCGA-D6-8569	241.67.0	Nationwide Children's Hospital	22	HNSC	4C31D6BF-49E1-4BD3-AAAA-1796580A6236	12	TCGA	2016	NO	Not Available	Oral Tongue	TCGA-D6-8569	83aa326a-09bf-41cf-945e-6b251f11f731	23	-19212		0	128	Not Available																								Not Evaluated	NOT HISPANIC OR LATINO
TCGA-D6-A4Z9-01A-11R-A24Z-07	Tumor	TCGA-D6-A4Z9	265.56.0	Nationwide Children's Hospital	22	HNSC	2E93E042-F179-4919-819B-71337A38DC1C	12	TCGA	2016	NO	Not Available	Oral Tongue	TCGA-D6-A4Z9	55A9E8AE-95A3-485C-8DF0-78740FCD58D8	23	-21659		0	112	Not Available																								Not Evaluated	NOT HISPANIC OR LATINO
TCGA-D6-A4ZB-01A-11R-A24Z-07	Tumor	TCGA-D6-A4ZB	265.56.0	Nationwide Children's Hospital	22	HNSC	C27CD1DD-1380-4912-BE2D-0E374BC360AC	12	TCGA	2016	NO	Not Available	Oral Tongue	TCGA-D6-A4ZB	E08E1D99-81E1-454A-9BDA-CDA92C9E22B4	15	-22455		0	104	Not Available																								Not Evaluated	NOT HISPANIC OR LATINO
TCGA-D6-A6EK-01A-11R-A31N-07	Tumor	TCGA-D6-A6EK	318.55.0	Nationwide Children's Hospital	22	HNSC	5E9A444A-4BC2-4C28-B8A0-26EE2069CF08	12	TCGA	2016	NO	Not Available	Larynx	TCGA-D6-A6EK	F248D7B9-6EA7-44EF-8AF6-8BEDA6C6BA4A	31	-24558		0	483	Not Available	TCGA-D6-A6EK-D58032	485A12A9-3B31-4D9C-8578-94E44D9B3427	Not Available	31	105	39	cisplatin	Partial Response	3	Not Available	Not Available	Not Available	Not Available	Not Applicable	Not Available	Not Available	NO	Chemotherapy	Not Available	Not Available	Not Available	NO	2014	Not Evaluated	NOT HISPANIC OR LATINO
TCGA-D6-A6EM-01A-21R-A31N-07	Tumor	TCGA-D6-A6EM	318.55.0	Nationwide Children's Hospital	22	HNSC	D1E169E6-42CD-4A50-A443-F41D755888EB	12	TCGA	2016	NO	Not Available	Oral Tongue	TCGA-D6-A6EM	F1099653-FD32-4459-86EB-40E0412CE2FA	31	-23865		0	232	Not Available																								Not Evaluated	NOT HISPANIC OR LATINO
TCGA-D6-A6EN-01A-11R-A31N-07	Tumor	TCGA-D6-A6EN	318.55.0	Nationwide Children's Hospital	22	HNSC	F10B578A-705A-4D24-99D5-41816AB527EB	12	TCGA	2016	NO	Not Available	Buccal Mucosa	TCGA-D6-A6EN	F13DFDCC-02F8-4A4C-A2FC-E6A45499BD4C	31	-26294		0	439	Not Available																								Not Evaluated	NOT HISPANIC OR LATINO
TCGA-D6-A6EO-01A-11R-A31N-07	Tumor	TCGA-D6-A6EO	318.55.0	Nationwide Children's Hospital	22	HNSC	9EBB431F-2B81-4597-9FAF-D5B35DB914F4	12	TCGA	2016	NO	Not Available	Floor of mouth	TCGA-D6-A6EO	42D342D9-F8A5-4940-9B6B-5773D66055F9	31	-16185		0	429	Not Available																								Not Evaluated	NOT HISPANIC OR LATINO
TCGA-D6-A6EP-01A-11R-A31N-07	Tumor	TCGA-D6-A6EP	318.55.0	Nationwide Children's Hospital	22	HNSC	DD9782C8-1D50-413C-946D-967629E8B0BB	12	TCGA	2016	NO	Not Available	Hypopharynx	TCGA-D6-A6EP	37159B2B-E564-47A9-ADAA-91B9571EF9DE	31	-22674		0	424	Not Available																								Not Evaluated	NOT HISPANIC OR LATINO
TCGA-D6-A6EQ-01A-11R-A31N-07	Tumor	TCGA-D6-A6EQ	318.55.0	Nationwide Children's Hospital	22	HNSC	B3DDE8DA-A3EF-49A2-BA50-D769D8DFE31E	12	TCGA	2016	NO	Not Available	Larynx	TCGA-D6-A6EQ	1ACDA00D-04FB-4D71-99A4-996F92601827	31	-20876		0	368	Not Available																								Not Evaluated	NOT HISPANIC OR LATINO
TCGA-D6-A6ES-01A-12R-A31N-07	Tumor	TCGA-D6-A6ES	318.55.0	Nationwide Children's Hospital	22	HNSC	C1EF3299-9A33-46BB-A6B3-11DB61DB8FD3	12	TCGA	2016	NO	Not Available	Larynx	TCGA-D6-A6ES	B47FB978-2DFB-4ABC-A5AF-6E14DD684182	31	-18408		0	24	Not Available																								Not Evaluated	NOT HISPANIC OR LATINO
TCGA-D6-A74Q-01A-11R-A34R-07	Tumor	TCGA-D6-A74Q	355.48.0	Nationwide Children's Hospital	22	HNSC	C07ED1F5-7FB6-4743-A828-05862806A0C4	12	TCGA	2016	NO	Not Available	Larynx	TCGA-D6-A74Q	F04F1C1C-6D6D-4A2B-BA88-110B08FCC596	31	-24702		0	338	Not Available																								Not Evaluated	NOT HISPANIC OR LATINO
TCGA-DQ-5624-01A-01R-1873-07	Tumor	TCGA-DQ-5624	145.84.0	Nationwide Children's Hospital	22	HNSC	C1821DB1-832F-490F-A237-EA03FEDE9D82	12	TCGA	2016	NO	Not Available	Oral Tongue	TCGA-DQ-5624	b4a41682-4aca-4f1d-bacd-66f5e6ec7466	22	-15867		0	1149	1149	TCGA-DQ-5624-D10164	4d6a624f-24c6-43bc-b0c6-0ff1a95fcbac	Not Available	22	63	36	Cisplatin	Not Available	3	2	80	mg/m2	ADJUVANT	Not Applicable	1	IV	NO	Chemotherapy	Not Available	347	mg	Not Available	2011	Not Available	NOT HISPANIC OR LATINO	Not Available	Not Available	Not Available
TCGA-DQ-5625-01A-01R-1873-07	Tumor	TCGA-DQ-5625	145.84.0	Nationwide Children's Hospital	22	HNSC	C61DC3CA-FC95-4558-9835-D07D98193650	12	TCGA	2016	YES	15	Oral Tongue	TCGA-DQ-5625	53d9a130-4a3a-4491-85cd-9a44415a1632	24	-19211		0	1058	Not Available																								Not Available	NOT HISPANIC OR LATINO	Not Available	Not Available	YES
TCGA-DQ-5629-01A-01R-1873-07	Tumor	TCGA-DQ-5629	145.84.0	Nationwide Children's Hospital	22	HNSC	F70EDC90-3993-41B4-ABEF-F268A4FF9415	12	TCGA	2016	YES	3	Larynx	TCGA-DQ-5629	e95e9e7d-a1ed-46eb-9cf8-1d355bf0577f	4	-23550		0	516	516	TCGA-DQ-5629-D10170	a9862b81-7a8c-4924-bb0c-4fc5bfdb07f2	Not Available	4	98	52	Carboplatin	Not Available	4	07	Not Available	Not Available	ADJUVANT	Not Applicable	1	IV	NO	Chemotherapy	Not Available	233	mg	Not Available	2011	Not Available	NOT HISPANIC OR LATINO	Not Available	Not Available	Not Available
TCGA-DQ-5630-01A-01R-1873-07	Tumor	TCGA-DQ-5630	145.84.0	Nationwide Children's Hospital	22	HNSC	94CD1A8B-C688-4264-8373-BF4B56BC1D10	12	TCGA	2016	YES	4	Oral Tongue	TCGA-DQ-5630	91a712b5-a724-48d0-ba06-4f6857683463	22	-26855		0	477	477																								Not Available	NOT HISPANIC OR LATINO	Not Available	Not Available	Not Available
TCGA-DQ-5631-01A-01R-1873-07	Tumor	TCGA-DQ-5631	145.84.0	Nationwide Children's Hospital	22	HNSC	4423570E-83BB-45F3-8715-3144FA445781	12	TCGA	2016	YES	1	Oral Tongue	TCGA-DQ-5631	10b3f56a-e61e-486b-8d3c-176668d5dc34	22	-19172	548	0	548	540	TCGA-DQ-5631-D10181;TCGA-DQ-5631-D10207;TCGA-DQ-5631-D10186	314dd14b-73ab-4cac-a3a4-4d1884e989d6;595d30e2-cfc0-4838-9f6a-fa554ffef774;112bfa41-a80c-4e54-87af-a3901a5460ce	Not Available;Not Available;Not Available	22;11;11	67;518;518	32;475;475	Cisplatin;Alimta;Carboplatin	Not Available;Not Available;Not Available	3;4;4	5;2;02	40;Not Available;Not Available	mg/m2;Not Available;Not Available	ADJUVANT;PALLIATIVE;PALLIATIVE	Not Applicable;Not Applicable;Not Applicable	01;2;2	IV;IV;IV	NO;NO;NO	Chemotherapy;Chemotherapy;Chemotherapy	Not Available;Not Available;Not Available	80;965;577	mg;mg;mg	Not Available;Not Available;Not Available	2011;2011;2011	Not Available	NOT HISPANIC OR LATINO	YES	YES	Not Available
TCGA-DQ-7588-01A-11R-2081-07	Tumor	TCGA-DQ-7588	188.78.0	Nationwide Children's Hospital	22	HNSC	60B7E2FF-DF47-4AEB-B7E7-5B3DA689A3D3	12	TCGA	2016	YES	10	Buccal Mucosa	TCGA-DQ-7588	8a3fdb52-63ef-48d7-95ff-167829825eb9	16	-24106	427	0		Not Available	TCGA-DQ-7588-D29656;TCGA-DQ-7588-D29657;TCGA-DQ-7588-D29659;TCGA-DQ-7588-D29655;TCGA-DQ-7588-D29660	922a9236-5a21-4d87-9254-029e49d73400;c7d3e770-c361-4aba-8224-7c6ee68727f9;a4fc4d60-02bd-4010-8177-6381336de8b2;42b21926-1ab0-4056-a3d7-710daa53c9d2;524d4fd7-aece-41b3-9cf6-962290779c47	Not Available;Not Available;Not Available;Not Available;Not Available	16;16;16;16;27	215;421;421;215;425	159;379;379;159;421	erbitux;docetaxel;AT-101;carboplatin;AT-101	Not Available;Not Available;Not Available;Not Available;Not Available	2;2;2;2;3	1;3;3;1;1	Not Available;152;80;Not Available;20	Not Available;mg;mg/day;Not Available;mg/day	RECURRENCE;PALLIATIVE;PALLIATIVE;RECURRENCE;PALLIATIVE	Not Applicable;Not Applicable;Not Applicable;Not Applicable;Not Applicable	1;2;2;1;2	IV;IV;PO;IV;PO	NO;NO;NO;NO;NO	Chemotherapy;Chemotherapy;Chemotherapy;Chemotherapy;Chemotherapy	Not Available;Not Available;Not Available;Not Available;Not Available	Not Available;455;480;Not Available;100	Not Available;mg;mg;Not Available;mg	Not Available;Not Available;Not Available;Not Available;Not Available	2012;2012;2012;2012;2012	Not Available	NOT HISPANIC OR LATINO	YES;YES	YES;NO	YES;NO
TCGA-DQ-7591-01A-11R-2081-07	Tumor	TCGA-DQ-7591	188.78.0	Nationwide Children's Hospital	22	HNSC	ACF466ED-C72E-4F59-81DC-6613B1D93E8E	12	TCGA	2016	YES	3	Base of tongue	TCGA-DQ-7591	3ef779cf-772e-445e-93c8-e1094ea8b878	16	-22798		0	360	Not Available	TCGA-DQ-7591-D29643;TCGA-DQ-7591-D29640	edb39596-25dd-481d-9cbf-62cf35d84a18;3ace2e6d-80b1-4989-9b9a-6976ddc1fc72	Not Available;Not Available	16;16	69;69	22;22	taxol;carboplatin	Not Available;Not Available	2;2	1;1	56;83	mg/wk;mg/wk	ADJUVANT;ADJUVANT	Not Applicable;Not Applicable	1;1	IV;IV	NO;NO	Chemotherapy;Chemotherapy	Not Available;Not Available	448;664	mg;mg	Not Available;Not Available	2012;2012	Not Available	NOT HISPANIC OR LATINO	NO	NO	NO
TCGA-DQ-7592-01A-11R-2081-07	Tumor	TCGA-DQ-7592	188.78.0	Nationwide Children's Hospital	22	HNSC	D92E9043-381C-4F39-A9A1-A9459F358159	12	TCGA	2016	YES	3	Oral Tongue	TCGA-DQ-7592	d82e6c52-9ea4-4f60-989c-cf95d464fd6f	16	-21041		0	299	Not Available	TCGA-DQ-7592-D29651	8b821505-2057-4d3c-a55e-c9031f05c315	Not Available	21	94	52	cisplatin	Not Available	2	1	65	mg/wk	ADJUVANT	Not Applicable	1	IV	NO	Chemotherapy	Not Available	455	mg	Not Available	2012	Not Available	NOT HISPANIC OR LATINO	Not Available	Not Available	Not Available
TCGA-F7-7848-01A-11R-2132-07	Tumor	TCGA-F7-7848	190.78.0	Nationwide Children's Hospital	22	HNSC	0F4E8228-76F7-435A-9202-999FEF62F8DD	12	TCGA	2016	YES	1	Larynx	TCGA-F7-7848	829b41b1-693b-4f7f-a5c2-68c14b079aae	20	-17251		0	35	Not Available																								Not Available	NOT HISPANIC OR LATINO
TCGA-F7-8298-01A-11R-2403-07	Tumor	TCGA-F7-8298	241.67.0	Nationwide Children's Hospital	22	HNSC	FEC7890B-DF85-4F1F-A720-DD80B254C101	12	TCGA	2016	YES	1	Larynx	TCGA-F7-8298	b4d5299d-1f25-4565-b612-0a0a4d6656ec	13	-21445		0	14	Not Available																								Not Available	NOT HISPANIC OR LATINO
TCGA-F7-8489-01A-31R-2403-07	Tumor	TCGA-F7-8489	241.67.0	Nationwide Children's Hospital	22	HNSC	02B524AA-EDDB-4D9C-9021-E2D8334F6617	12	TCGA	2016	NO	Not Available	Floor of mouth	TCGA-F7-8489	513b1a26-8f1b-49a0-8957-de10930e6c98	10	-17873		0	14	Not Available																								Not Available	NOT HISPANIC OR LATINO
TCGA-F7-A50G-01A-11R-A266-07	Tumor	TCGA-F7-A50G	273.58.0	Nationwide Children's Hospital	22	HNSC	13331BFE-0A92-4977-BAAD-AB089B75C996	12	TCGA	2016	NO	Not Available	Oral Tongue	TCGA-F7-A50G	85AE3B0F-3A54-4A23-BE25-9A4DEEBBC011	28	-24285		0	15	Not Available																								Unknown	NOT HISPANIC OR LATINO
TCGA-F7-A50I-01A-11R-A28V-07	Tumor	TCGA-F7-A50I	301.57.0	Nationwide Children's Hospital	22	HNSC	DDAF62E1-B329-4449-BF62-A83BACC01342	12	TCGA	2016	YES	1	Larynx	TCGA-F7-A50I	795677D4-DC60-4EBD-A9DF-E88713E5A4AA	28	-26373		0	92	Not Available																								Unknown	Unknown
TCGA-F7-A50J-01A-21R-A28V-07	Tumor	TCGA-F7-A50J	301.57.0	Nationwide Children's Hospital	22	HNSC	E26C11A8-E74E-469C-BEF2-980D734CEF6A	12	TCGA	2016	YES	0	Oral Tongue	TCGA-F7-A50J	15E43EE8-3080-4895-84FB-A24AD3A68B97	28	-24758		0	156	Not Available	TCGA-F7-A50J-D49371	27B33D55-BFC3-47A5-8C02-6D8441EA9F55	Not Available	30	114	70	Cisplatin	Complete Response	9	Not Available	Not Available	Not Available	Not Available	Not Applicable	Not Available	Not Available	NO	Chemotherapy	Not Available	Not Available	Not Available	NO	2013	Unknown	NOT HISPANIC OR LATINO
TCGA-F7-A61S-01A-11R-A28V-07	Tumor	TCGA-F7-A61S	301.57.0	Nationwide Children's Hospital	22	HNSC	8CBA1B0A-110E-4540-A07D-9AF4A463CFEB	12	TCGA	2016	YES	1	Oral Tongue	TCGA-F7-A61S	7A211CE6-3162-4F58-BF24-9B68562913D5	28	-22655		0	3	Not Available																								Not Available	NOT HISPANIC OR LATINO
TCGA-F7-A61V-01A-11R-A28V-07	Tumor	TCGA-F7-A61V	301.57.0	Nationwide Children's Hospital	22	HNSC	86E4602A-0692-4E4A-B45A-2B70E4D67DE7	12	TCGA	2016	Not Available	Not Available	Base of tongue	TCGA-F7-A61V	0B67F9BB-E469-4B4C-9CE6-6AF1C7B1AAB2	28	-19857		0	9	Not Available																								Not Available	NOT HISPANIC OR LATINO
TCGA-F7-A61W-01A-11R-A28V-07	Tumor	TCGA-F7-A61W	301.57.0	Nationwide Children's Hospital	22	HNSC	45818273-57D3-4C11-9574-CFDBCCC72C2C	12	TCGA	2016	YES	1	Oral Tongue	TCGA-F7-A61W	8F6C64C9-7799-436D-BFF0-B166E56532A8	28	-18879		0	14	Not Available																								Not Evaluated	NOT HISPANIC OR LATINO
TCGA-F7-A620-01A-11R-A28V-07	Tumor	TCGA-F7-A620	301.57.0	Nationwide Children's Hospital	22	HNSC	9FF0F48B-0D2E-4540-8B2E-28D26B966021	12	TCGA	2016	YES	Not Available	Base of tongue	TCGA-F7-A620	B86E27D4-A524-4855-89C6-D46A4079A9A0	28	-17475		0	13	Not Available																								Not Evaluated	NOT HISPANIC OR LATINO
TCGA-F7-A622-01A-11R-A28V-07	Tumor	TCGA-F7-A622	301.57.0	Nationwide Children's Hospital	22	HNSC	CE77B354-BB32-44C6-B5FE-F9D70E5FCEBF	12	TCGA	2016	YES	1	Larynx	TCGA-F7-A622	9C128871-1026-46AB-9AE9-7C6AAC468B11	28	-27456		0	13	Not Available																								Not Evaluated	NOT HISPANIC OR LATINO
TCGA-F7-A623-01A-11R-A28V-07	Tumor	TCGA-F7-A623	301.57.0	Nationwide Children's Hospital	22	HNSC	4188E98B-C300-4184-8AC3-8B4A28FC6076	12	TCGA	2016	YES	1	Larynx	TCGA-F7-A623	FCB0C5E5-F63C-41B3-AE0E-3D1D6AAA66E4	28	-25592		0	6	Not Available																								Not Evaluated	NOT HISPANIC OR LATINO
TCGA-F7-A624-01A-22R-A30B-07	Tumor	TCGA-F7-A624	311.57.0	Nationwide Children's Hospital	22	HNSC	B1799378-09CF-48EC-81A6-055BC98C16A5	12	TCGA	2016	YES	1	Buccal Mucosa	TCGA-F7-A624	46E51EB2-0C5E-457B-AF1A-8BAC1B8A8BEA	28	-26667		0	0	Not Available																								Not Evaluated	NOT HISPANIC OR LATINO
TCGA-H7-7774-01A-21R-2081-07	Tumor	TCGA-H7-7774	188.78.0	Nationwide Children's Hospital	22	HNSC	B936AE75-C415-422B-A604-780B49346B69	12	TCGA	2016	YES	0	Oral Cavity	TCGA-H7-7774	eeae67ac-c9e0-468d-aad6-052501f7b982	23	-27519		0	30	Not Available																								Not Available	NOT HISPANIC OR LATINO
TCGA-H7-8501-01A-11R-2403-07	Tumor	TCGA-H7-8501	241.67.0	Nationwide Children's Hospital	22	HNSC	B291F20F-AF20-4AA0-B5D2-E0136AD4BCCA	12	TCGA	2016	YES	1	Buccal Mucosa	TCGA-H7-8501	f090838e-7cc0-4ba8-b3a2-faaa99743785	21	-19808		0	58	Not Available	TCGA-H7-8501-D45206	CE59C44C-095C-4C81-90DD-BC9E40E23C2F	Not Available	10	137	76	Not Available	Complete Response	7	Not Available	Not Available	Not Available	Not Available	Not Applicable	Not Available	Not Available	NO	Chemotherapy	Not Available	Not Available	Not Available	Not Available	2013	Not Evaluated	NOT HISPANIC OR LATINO
TCGA-H7-8502-01A-11R-2403-07	Tumor	TCGA-H7-8502	241.67.0	Nationwide Children's Hospital	22	HNSC	1EFB428C-F423-40B2-90C4-8D6BC9AAD7B0	12	TCGA	2016	YES	8	Oral Cavity	TCGA-H7-8502	ce603d46-299a-4ffb-84ab-b3b914a561b9	21	-18286		0	133	Not Available	TCGA-H7-8502-D34530	29CBDADF-BF68-43DD-9DC3-917E98F13DDB	Not Available	21	108	77	Not Available	Unknown	8	Not Available	Not Available	Not Available	Not Available	Not Applicable	Not Available	Not Available	NO	Chemotherapy	Not Available	Not Available	Not Available	Not Available	2012	Unknown	NOT HISPANIC OR LATINO
TCGA-H7-A6C4-01A-11R-A30B-07	Tumor	TCGA-H7-A6C4	311.57.0	Nationwide Children's Hospital	22	HNSC	B088346E-53A6-4A13-B945-05D86BDB3EB2	12	TCGA	2016	YES	0	Oral Tongue	TCGA-H7-A6C4	EBFB8C1B-471F-4ACB-A1FE-287E02CADBA7	27	-13137		0	414	Not Available	TCGA-H7-A6C4-D52043;TCGA-H7-A6C4-D52044;TCGA-H7-A6C4-D52046	C9C7CB40-30B9-4383-A2E0-7972E9914041;0F0597F1-75B8-449A-BBFB-E6C6A65DF58B;48D634EA-A71B-4D0A-AFF3-BD9490F2C76E	Not Available;Not Available;Not Available	27;27;27	Not Available;113;321	74;Not Available;Not Available	Cisplatin;Carboplatin;Cetuximab	Complete Response;Complete Response;Complete Response	11;11;11	Not Available;Not Available;Not Available	Not Available;Not Available;Not Available	Not Available;Not Available;Not Available	Not Available;Not Available;Not Available	Not Applicable;Not Applicable;Not Applicable	Not Available;Not Available;Not Available	Not Available;Not Available;Not Available	NO;NO;NO	Chemotherapy;Chemotherapy;Chemotherapy	Not Available;Not Available;Not Available	Not Available;Not Available;Not Available	Not Available;Not Available;Not Available	Not Available;NO;NO	2013;2013;2013	Not Evaluated	NOT HISPANIC OR LATINO
TCGA-H7-A6C4-11A-21R-A466-07	Normal	TCGA-H7-A6C4	311.57.0	Nationwide Children's Hospital	22	HNSC	B088346E-53A6-4A13-B945-05D86BDB3EB2	12	TCGA	2016	YES	0	Oral Tongue	TCGA-H7-A6C4	EBFB8C1B-471F-4ACB-A1FE-287E02CADBA7	27	-13137		0	414	Not Available	TCGA-H7-A6C4-D52043;TCGA-H7-A6C4-D52044;TCGA-H7-A6C4-D52046	C9C7CB40-30B9-4383-A2E0-7972E9914041;0F0597F1-75B8-449A-BBFB-E6C6A65DF58B;48D634EA-A71B-4D0A-AFF3-BD9490F2C76E	Not Available;Not Available;Not Available	27;27;27	Not Available;113;321	74;Not Available;Not Available	Cisplatin;Carboplatin;Cetuximab	Complete Response;Complete Response;Complete Response	11;11;11	Not Available;Not Available;Not Available	Not Available;Not Available;Not Available	Not Available;Not Available;Not Available	Not Available;Not Available;Not Available	Not Applicable;Not Applicable;Not Applicable	Not Available;Not Available;Not Available	Not Available;Not Available;Not Available	NO;NO;NO	Chemotherapy;Chemotherapy;Chemotherapy	Not Available;Not Available;Not Available	Not Available;Not Available;Not Available	Not Available;Not Available;Not Available	Not Available;NO;NO	2013;2013;2013	Not Evaluated	NOT HISPANIC OR LATINO
TCGA-H7-A6C5-11A-11R-A30B-07	Normal	TCGA-H7-A6C5	311.57.0	Nationwide Children's Hospital	22	HNSC	A3212777-16BE-499A-AF84-64EAF070452E	12	TCGA	2016	YES	Not Available	Larynx	TCGA-H7-A6C5	B6D1490A-AE85-4E99-A053-1614B498A081	2	-23808		0	403	Not Available																								Not Evaluated	NOT HISPANIC OR LATINO
TCGA-H7-A76A-01A-51R-A34R-07	Tumor	TCGA-H7-A76A	355.48.0	Nationwide Children's Hospital	22	HNSC	2AF5C8A9-A29A-43C9-8269-BDB543227263	12	TCGA	2016	YES	2	Tonsil	TCGA-H7-A76A	59A7D695-CB0C-47B8-BA9D-CA52CA2CFA7D	23	-20946		0	206	Not Available																								Not Evaluated	NOT HISPANIC OR LATINO
TCGA-HD-7229-01A-11R-2016-07	Tumor	TCGA-HD-7229	164.84.0	Nationwide Children's Hospital	22	HNSC	5A71F727-5A8C-4687-8207-2EFD55C4FFEB	12	TCGA	2016	NO	Not Available	Larynx	TCGA-HD-7229	5c48e21f-1fe9-4007-9b0c-7ca766586fff	5	-22076		0	2	Not Available	TCGA-HD-7229-D64307;TCGA-HD-7229-D64308;TCGA-HD-7229-D64309;TCGA-HD-7229-D64310;TCGA-HD-7229-D64311;TCGA-HD-7229-D64312	BB83B157-EA50-4A0B-94B6-2E81613D9A43;967D6EAB-B5EE-47E6-B5B1-F99FA3289CA5;E8E602C2-DFE5-45EC-BFA6-C20058005828;15A8D8D6-99D9-46CF-B88D-29C97991D2C7;2A72E5DE-3D94-41EA-A33D-C6ED26D8A9C2;86DDF2DE-FA13-426F-80AC-325EB7A10A02	Not Available;Not Available;Not Available;Not Available;Not Available;Not Available	28;28;28;28;28;28	85;85;85;187;187;187	35;35;35;187;187;187	Carboplatin;Paclitaxel;Erbitux;Cisplatin;Docetaxel;5-FU	Unknown;Unknown;Unknown;Clinical Progressive Disease;Clinical Progressive Disease;Clinical Progressive Disease	8;8;8;8;8;8	Not Available;Not Available;Not Available;Not Available;Not Available;Not Available	Not Available;Not Available;Not Available;Not Available;Not Available;Not Available	Not Available;Not Available;Not Available;Not Available;Not Available;Not Available	Not Available;Not Available;Not Available;Not Available;Not Available;Not Available	Not Applicable;Not Applicable;Not Applicable;Not Applicable;Not Applicable;Not Applicable	Not Available;Not Available;Not Available;Not Available;Not Available;Not Available	Not Available;Not Available;Not Available;Not Available;Not Available;Not Available	NO;NO;NO;NO;NO;NO	Chemotherapy;Chemotherapy;Chemotherapy;Chemotherapy;Chemotherapy;Chemotherapy	Not Available;Not Available;Not Available;Not Available;Not Available;Not Available	Not Available;Not Available;Not Available;Not Available;Not Available;Not Available	Not Available;Not Available;Not Available;Not Available;Not Available;Not Available	NO;NO;NO;NO;NO;NO	2014;2014;2014;2014;2014;2014	Not Available	NOT HISPANIC OR LATINO
TCGA-HD-7753-01A-11R-2081-07	Tumor	TCGA-HD-7753	188.78.0	Nationwide Children's Hospital	22	HNSC	05285885-B327-4A59-AF38-54B1826C0C19	12	TCGA	2016	YES	4	Oropharynx	TCGA-HD-7753	e8ac39e6-377a-412c-b18d-f6c4fc654ec6	9	-22774		0	5	Not Available	TCGA-HD-7753-D64315	69A92CC1-BEF7-4E0B-8305-F98D83B905C9	Not Available	28	85	71	Erbitux	Complete Response	8	Not Available	Not Available	Not Available	Not Available	Not Applicable	Not Available	Not Available	NO	Chemotherapy	Not Available	Not Available	Not Available	NO	2014	Not Available	NOT HISPANIC OR LATINO
TCGA-HD-7754-01A-11R-2081-07	Tumor	TCGA-HD-7754	188.78.0	Nationwide Children's Hospital	22	HNSC	535CF351-DB55-4807-8E6C-CFA3C47CF19E	12	TCGA	2016	YES	4	Tonsil	TCGA-HD-7754	10f53522-9ae7-47b9-80aa-b4b481561465	9	-25365		0	25	Not Available																								Not Available	NOT HISPANIC OR LATINO
TCGA-HD-7831-01A-11R-2132-07	Tumor	TCGA-HD-7831	190.78.0	Nationwide Children's Hospital	22	HNSC	A756E7E6-29B6-4D43-8A65-A8E043905813	12	TCGA	2016	YES	0	Oral Tongue	TCGA-HD-7831	0f718e17-86c1-4221-a878-d57ae87e744f	9	-27334		0	0	Not Available																								Not Available	NOT HISPANIC OR LATINO
TCGA-HD-7832-01A-11R-2132-07	Tumor	TCGA-HD-7832	190.78.0	Nationwide Children's Hospital	22	HNSC	C4E8CE75-7C84-480D-84D3-4691CC3D860F	12	TCGA	2016	YES	6	Floor of mouth	TCGA-HD-7832	31e58fac-3ac3-4eeb-82d6-3f2b5cb8a60d	9	-19192		0	0	Not Available																								Not Available	NOT HISPANIC OR LATINO
TCGA-HD-8224-01A-11R-2403-07	Tumor	TCGA-HD-8224	241.67.0	Nationwide Children's Hospital	22	HNSC	20A5F8E1-9D2B-4AF1-A7E6-F7FB66DA9330	12	TCGA	2016	YES	5	Base of tongue	TCGA-HD-8224	43b99616-d7b4-404e-8912-4275f8d6dc55	13	-23069		0	55	Not Available	TCGA-HD-8224-D51231	78079EB9-5B8A-4EB2-A11B-32931552F7F7	Not Available	13	147	90	Cetuximab	Clinical Progressive Disease	11	Not Available	Not Available	Not Available	Not Available	Not Applicable	Not Available	Not Available	NO	Chemotherapy	Not Available	Not Available	Not Available	NO	2013	Not Available	NOT HISPANIC OR LATINO
TCGA-HD-8314-01A-11R-2403-07	Tumor	TCGA-HD-8314	241.67.0	Nationwide Children's Hospital	22	HNSC	156EE02E-78A2-4992-91E0-8C83CE572917	12	TCGA	2016	NO	Not Available	Base of tongue	TCGA-HD-8314	f1b7b418-80d2-4ddf-94cd-f79abba0a2a4	9	-21517		0	44	Not Available	TCGA-HD-8314-D64326	01833303-65F6-411B-BE41-32AEADD47BDA	Not Available	28	121	79	Cisplatin	Complete Response	8	Not Available	Not Available	Not Available	Not Available	Not Applicable	Not Available	Not Available	NO	Chemotherapy	Not Available	Not Available	Not Available	NO	2014	Not Evaluated	NOT HISPANIC OR LATINO
TCGA-HD-8634-01A-11R-2403-07	Tumor	TCGA-HD-8634	241.67.0	Nationwide Children's Hospital	22	HNSC	9EF51FCD-9928-4E76-87C6-9248CADADC3B	12	TCGA	2016	YES	7	Oral Tongue	TCGA-HD-8634	22933e67-5c61-4c13-9772-5adb78785b34	28	-18718		0	24	Not Available																								Unknown	NOT HISPANIC OR LATINO
TCGA-HD-8635-01A-11R-2403-07	Tumor	TCGA-HD-8635	241.67.0	Nationwide Children's Hospital	22	HNSC	4F7D7FC0-42A2-4FD0-B49C-45B92844FF9D	12	TCGA	2016	YES	4	Oral Tongue	TCGA-HD-8635	b843df7e-db06-4d29-b00d-6a93effd9191	28	-22340		0	25	Not Available																								Unknown	NOT HISPANIC OR LATINO
TCGA-HD-8635-11A-01R-2403-07	Normal	TCGA-HD-8635	241.67.0	Nationwide Children's Hospital	22	HNSC	4F7D7FC0-42A2-4FD0-B49C-45B92844FF9D	12	TCGA	2016	YES	4	Oral Tongue	TCGA-HD-8635	b843df7e-db06-4d29-b00d-6a93effd9191	28	-22340		0	25	Not Available																								Unknown	NOT HISPANIC OR LATINO
TCGA-HD-A4C1-01A-11R-A24H-07	Tumor	TCGA-HD-A4C1	260.56.0	Nationwide Children's Hospital	22	HNSC	E4517E7C-682C-436D-A4B8-BB470EF78547	12	TCGA	2016	NO	Not Available	Buccal Mucosa	TCGA-HD-A4C1	765CC306-BDAE-4CAF-AD1E-35B8FE95C220	25	-15096		0	11	Not Available																								Unknown	NOT HISPANIC OR LATINO
TCGA-HD-A633-01A-11R-A28V-07	Tumor	TCGA-HD-A633	301.57.0	Nationwide Children's Hospital	22	HNSC	44944245-5678-4691-AAD7-885BE036AA43	12	TCGA	2016	YES	Not Available	Oral Cavity	TCGA-HD-A633	C0EDDE5E-D229-4061-8820-14AFC712C5B6	20	-27057		0	49	Not Available																								Unknown	NOT HISPANIC OR LATINO
TCGA-HD-A634-01A-11R-A28V-07	Tumor	TCGA-HD-A634	301.57.0	Nationwide Children's Hospital	22	HNSC	0E0A24ED-A2BA-447A-98D2-B0564BDDBAE2	12	TCGA	2016	YES	Not Available	Tonsil	TCGA-HD-A634	A0B136FB-3A0A-4411-8907-4CA775C7D04E	20	-20810		0	10	Not Available																								Unknown	NOT HISPANIC OR LATINO
TCGA-HD-A6HZ-01A-12R-A31N-07	Tumor	TCGA-HD-A6HZ	318.55.0	Nationwide Children's Hospital	22	HNSC	A87D7DF3-BF4E-4C32-B78E-0426C753CAAF	12	TCGA	2016	NO	Not Available	Oral Tongue	TCGA-HD-A6HZ	9205DC07-93F5-4B5E-924E-8E097616160F	20	-29045		0	111	Not Available																								Unknown	NOT HISPANIC OR LATINO
TCGA-HD-A6HZ-11A-11R-A31N-07	Normal	TCGA-HD-A6HZ	318.55.0	Nationwide Children's Hospital	22	HNSC	A87D7DF3-BF4E-4C32-B78E-0426C753CAAF	12	TCGA	2016	NO	Not Available	Oral Tongue	TCGA-HD-A6HZ	9205DC07-93F5-4B5E-924E-8E097616160F	20	-29045		0	111	Not Available																								Unknown	NOT HISPANIC OR LATINO
TCGA-HD-A6I0-01A-11R-A31N-07	Tumor	TCGA-HD-A6I0	318.55.0	Nationwide Children's Hospital	22	HNSC	FBF4ECBD-0E68-4B89-8152-E8074BF45681	12	TCGA	2016	YES	4	Oral Cavity	TCGA-HD-A6I0	DEC3C21B-3F59-472F-8573-27B0E830AA92	20	-20491		0	33	Not Available																								Unknown	NOT HISPANIC OR LATINO
TCGA-HD-A6I0-11A-11R-A31N-07	Normal	TCGA-HD-A6I0	318.55.0	Nationwide Children's Hospital	22	HNSC	FBF4ECBD-0E68-4B89-8152-E8074BF45681	12	TCGA	2016	YES	4	Oral Cavity	TCGA-HD-A6I0	DEC3C21B-3F59-472F-8573-27B0E830AA92	20	-20491		0	33	Not Available																								Unknown	NOT HISPANIC OR LATINO
TCGA-HL-7533-01A-11R-2232-07	Tumor	TCGA-HL-7533	215.70.0	Nationwide Children's Hospital	22	HNSC	9C5C9064-40F6-42A1-9AF7-62AF726CA3C4	12	TCGA	2016	YES	2.5	Oral Cavity	TCGA-HL-7533	9d469689-0413-4898-aa83-c6756cbfe117	25	-23950		0	692	Not Available	TCGA-HL-7533-D48759;TCGA-HL-7533-D48760;TCGA-HL-7533-D48761	E2C4D622-6D31-49C1-B697-B920B4734CFD;F5D122A1-281B-4BAB-9B1B-0DCDC88619EB;A3A1EBF1-F125-413D-9A93-EB84F44577A2	Not Available;Not Available;Not Available	20;20;20	87;87;87	24;24;24	cisplatin;taxotere;xeloda	Complete Response;Complete Response;Complete Response	9;9;9	Not Available;Not Available;Not Available	Not Available;Not Available;Not Available	Not Available;Not Available;Not Available	Not Available;Not Available;Not Available	Not Applicable;Not Applicable;Not Applicable	Not Available;Not Available;Not Available	Not Available;Not Available;Not Available	NO;NO;NO	Chemotherapy;Chemotherapy;Chemotherapy	Not Available;Not Available;Not Available	Not Available;Not Available;Not Available	Not Available;Not Available;Not Available	NO;NO;NO	2013;2013;2013	Not Available	NOT HISPANIC OR LATINO
TCGA-IQ-7630-01A-11R-2081-07	Tumor	TCGA-IQ-7630	188.78.0	Nationwide Children's Hospital	22	HNSC	E9DB4D5D-839D-4904-B6AE-4DE2CAEC1A8D	12	TCGA	2016	NO	Not Available	Oropharynx	TCGA-IQ-7630	ebd1be2c-35ca-45c0-9aba-9baf432114c1	13	-18131		0	160	Not Available	TCGA-IQ-7630-D38966;TCGA-IQ-7630-D38968	62308BC2-5EC2-453B-B7AD-BDBC560EEFA3;02C628D8-7F10-4179-939A-9BE508E45F66	Not Available;Not Available	7;7	147;147	102;102	Docetaxel;Cetuximab	Complete Response;Complete Response	1;1	Not Available;Not Available	Not Available;Not Available	Not Available;Not Available	Not Available;Not Available	Not Applicable;Not Applicable	Not Available;Not Available	Not Available;Not Available	NO;NO	Chemotherapy;Targeted Molecular therapy	Not Available;Not Available	Not Available;Not Available	Not Available;Not Available	NO;NO	2013;2013	Not Available	HISPANIC OR LATINO
TCGA-IQ-7631-01A-11R-2081-07	Tumor	TCGA-IQ-7631	188.78.0	Nationwide Children's Hospital	22	HNSC	A06B3FCC-6FDD-4929-BF6D-7FAEE047B9C8	12	TCGA	2016	NO	Not Available	Buccal Mucosa	TCGA-IQ-7631	d8a6383e-3320-4d2c-9017-31e8e1e8f120	13	-22151		0	122	Not Available																								Not Available	NOT HISPANIC OR LATINO
TCGA-IQ-7632-01A-11R-2081-07	Tumor	TCGA-IQ-7632	188.78.0	Nationwide Children's Hospital	22	HNSC	D83DD849-1EBF-4435-B288-0FD78C231EB3	12	TCGA	2016	NO	Not Available	Alveolar Ridge	TCGA-IQ-7632	601a4146-8093-4f20-9a0a-a97916c9e7f6	13	-24986		0	113	Not Available																								Not Available	NOT HISPANIC OR LATINO
TCGA-IQ-A61E-01A-22R-A30B-07	Tumor	TCGA-IQ-A61E	311.57.0	Nationwide Children's Hospital	22	HNSC	30893FDF-819B-418A-B1D4-69E1C2FF0CAF	12	TCGA	2016	YES	3	Oral Tongue	TCGA-IQ-A61E	D3F786A6-5D72-4D6E-85FD-0C6ADE9F6E95	22	-20417		0	588	Not Available	TCGA-IQ-A61E-D45794	A1EDB1AA-E75C-4E38-97F4-AEBF97E969C5	Not Available	22	138	96	Cisplatin	Complete Response	7	Not Available	Not Available	Not Available	Not Available	Not Applicable	Not Available	Not Available	NO	Chemotherapy	Not Available	Not Available	Not Available	NO	2013	Not Available	NOT HISPANIC OR LATINO
TCGA-IQ-A61G-01A-11R-A30B-07	Tumor	TCGA-IQ-A61G	311.57.0	Nationwide Children's Hospital	22	HNSC	4262CE45-968B-457C-BF6C-1405F81F0AFD	12	TCGA	2016	NO	Not Available	Floor of mouth	TCGA-IQ-A61G	C512BA69-7B90-4334-92EB-48AB91AA05F2	1	-21066		0	360	Not Available	TCGA-IQ-A61G-D46116	1AC89840-C432-4BFB-B6FA-8F59B585E207	Not Available	1	168	130	Cisplatin	Clinical Progressive Disease	8	Not Available	Not Available	Not Available	Not Available	Not Applicable	Not Available	Not Available	NO	Chemotherapy	Not Available	Not Available	Not Available	NO	2013	Not Evaluated	HISPANIC OR LATINO
TCGA-IQ-A61H-01A-11R-A30B-07	Tumor	TCGA-IQ-A61H	311.57.0	Nationwide Children's Hospital	22	HNSC	C3CD4319-53D9-4966-A322-1A888EA2F255	12	TCGA	2016	NO	Not Available	Oral Tongue	TCGA-IQ-A61H	90D21B9B-DBB8-43A6-9817-67ED69FABDC0	22	-27990		0	412	Not Available																								Not Evaluated	HISPANIC OR LATINO
TCGA-IQ-A61I-01A-11R-A30B-07	Tumor	TCGA-IQ-A61I	311.57.0	Nationwide Children's Hospital	22	HNSC	79CC96A9-EF15-4E53-967B-094DCF0B5A0D	12	TCGA	2016	NO	Not Available	Oropharynx	TCGA-IQ-A61I	B9AAC2A5-5CA9-4F57-BA02-B53904256467	26	-23035	2	0		Not Available																								Not Evaluated	NOT HISPANIC OR LATINO
TCGA-IQ-A61J-01A-11R-A30B-07	Tumor	TCGA-IQ-A61J	311.57.0	Nationwide Children's Hospital	22	HNSC	2ABDF174-F8B1-4289-AFEB-E94B653C02DA	12	TCGA	2016	NO	Not Available	Oral Tongue	TCGA-IQ-A61J	D69E29CA-24BE-4F35-A581-F82E624B8E8B	26	-19913		0	440	Not Available	TCGA-IQ-A61J-D45953	EF73E5A4-D9DF-4B59-914F-B55699E32444	Not Available	26	99	64	Cisplatin	Complete Response	7	Not Available	Not Available	Not Available	Not Available	Not Applicable	Not Available	Not Available	NO	Chemotherapy	Not Available	Not Available	Not Available	NO	2013	Not Evaluated	NOT HISPANIC OR LATINO
TCGA-IQ-A61O-01A-11R-A30B-07	Tumor	TCGA-IQ-A61O	311.57.0	Nationwide Children's Hospital	22	HNSC	4E226F3A-2C39-4135-99DC-4DCE2A1FF79A	12	TCGA	2016	NO	Not Available	Oropharynx	TCGA-IQ-A61O	B835289F-6174-4BF9-AEDF-9EBB9EF4EB62	1	-15920		0	360	Not Available	TCGA-IQ-A61O-D46113	4C230DB3-D647-4B7B-8BA6-D932229055CA	Not Available	1	111	69	Cisplatin	Complete Response	8	Not Available	Not Available	Not Available	Not Available	Not Applicable	Not Available	Not Available	NO	Chemotherapy	Not Available	Not Available	Not Available	NO	2013	Not Evaluated	HISPANIC OR LATINO
TCGA-IQ-A6SG-01A-12R-A34R-07	Tumor	TCGA-IQ-A6SG	355.48.0	Nationwide Children's Hospital	22	HNSC	00B611B1-73C6-4A23-9F3C-ACC5FFBADB60	12	TCGA	2016	Not Available	Not Available	Oral Tongue	TCGA-IQ-A6SG	C2F1B2D5-1302-4E29-8889-37BA34E91DE2	27	-22529		0	579	Not Available																								Unknown	HISPANIC OR LATINO
TCGA-IQ-A6SH-01A-12R-A34R-07	Tumor	TCGA-IQ-A6SH	355.48.0	Nationwide Children's Hospital	22	HNSC	B7CD0D18-AD01-4C86-8F7D-1195D9A38F44	12	TCGA	2016	Not Available	Not Available	Oral Tongue	TCGA-IQ-A6SH	573E3713-781F-447E-9F4D-A7FAAE4A4F03	27	-20109		0	471	Not Available																								Not Available	NOT HISPANIC OR LATINO
TCGA-KU-A66S-01A-21R-A30B-07	Tumor	TCGA-KU-A66S	311.57.0	Nationwide Children's Hospital	22	HNSC	AAABFC1B-B070-4E0C-AD1E-27AEAA5A937C	12	TCGA	2016	NO	Not Available	Larynx	TCGA-KU-A66S	5ED1B22D-99CA-4C21-B5D4-851E4A6217E9	27	-25454		0	224	Not Available																								Not Evaluated	NOT HISPANIC OR LATINO
TCGA-KU-A66T-01A-11R-A30B-07	Tumor	TCGA-KU-A66T	311.57.0	Nationwide Children's Hospital	22	HNSC	F022B783-377E-4BB4-AF75-D02BAE3C1E06	12	TCGA	2016	NO	Not Available	Floor of mouth	TCGA-KU-A66T	27392405-1365-49E6-8AFE-7C18946AB06E	27	-19405		0	210	Not Available																								Not Evaluated	NOT HISPANIC OR LATINO
TCGA-KU-A6H7-01A-11R-A31N-07	Tumor	TCGA-KU-A6H7	318.55.0	Nationwide Children's Hospital	22	HNSC	873E4262-7D35-4325-9359-035229CF3239	12	TCGA	2016	YES	1	Tonsil	TCGA-KU-A6H7	ABBCC1D8-AB74-4459-BF28-CC627BEF440E	25	-20314		0	146	Not Available	TCGA-KU-A6H7-D49035	11C1650F-C510-4D0F-B3A0-457643D343A3	Not Available	25	100	65	Cisplatin	Complete Response	9	Not Available	Not Available	Not Available	Not Available	Not Applicable	Not Available	Not Available	NO	Chemotherapy	Not Available	Not Available	Not Available	NO	2013	Not Evaluated	NOT HISPANIC OR LATINO
TCGA-KU-A6H7-06A-21R-A31N-07	Tumor	TCGA-KU-A6H7	318.55.0	Nationwide Children's Hospital	22	HNSC	873E4262-7D35-4325-9359-035229CF3239	12	TCGA	2016	YES	1	Tonsil	TCGA-KU-A6H7	ABBCC1D8-AB74-4459-BF28-CC627BEF440E	25	-20314		0	146	Not Available	TCGA-KU-A6H7-D49035	11C1650F-C510-4D0F-B3A0-457643D343A3	Not Available	25	100	65	Cisplatin	Complete Response	9	Not Available	Not Available	Not Available	Not Available	Not Applicable	Not Available	Not Available	NO	Chemotherapy	Not Available	Not Available	Not Available	NO	2013	Not Evaluated	NOT HISPANIC OR LATINO
TCGA-KU-A6H8-01A-21R-A34R-07	Tumor	TCGA-KU-A6H8	355.48.0	Nationwide Children's Hospital	22	HNSC	4CD65269-1436-434C-83E5-3FDDFDAF35A3	12	TCGA	2016	YES	2	Oral Tongue	TCGA-KU-A6H8	9BF40EEB-9A87-44A2-A782-197AB954C937	25	-15066		0	168	Not Available	TCGA-KU-A6H8-D49028;TCGA-KU-A6H8-D54127;TCGA-KU-A6H8-D54128	1FF745F6-3C00-419C-A325-A31DC3EC5950;5B00B1C9-A489-4C6F-BEBF-226F6D522440;1AFE9E4F-E16A-45B4-BFF4-4120AAEDF4FD	Not Available;Not Available;Not Available	25;17;17	174;Not Available;Not Available	122;210;210	Cetuximab;Taxol;Carboplatin	Clinical Progressive Disease;Not Applicable;Not Applicable	9;12;12	Not Available;Not Available;Not Available	Not Available;Not Available;Not Available	Not Available;Not Available;Not Available	Not Available;Not Available;Not Available	Not Applicable;Not Applicable;Not Applicable	Not Available;Not Available;Not Available	Not Available;Not Available;Not Available	NO;YES;YES	Immunotherapy;Chemotherapy;Chemotherapy	Not Available;Not Available;Not Available	Not Available;Not Available;Not Available	Not Available;Not Available;Not Available	NO;NO;NO	2013;2013;2013	Not Evaluated	NOT HISPANIC OR LATINO
TCGA-MT-A51W-01A-21R-A266-07	Tumor	TCGA-MT-A51W	273.58.0	Nationwide Children's Hospital	22	HNSC	F6F92598-9F67-4C38-93EF-781ADEE64778	12	TCGA	2016	YES	7	Tonsil	TCGA-MT-A51W	6EA380AD-D73D-41B2-B448-2D224DEEC01B	28	-19098		0	14	Not Available																								Not Evaluated	NOT HISPANIC OR LATINO
TCGA-MT-A51X-01A-11R-A266-07	Tumor	TCGA-MT-A51X	273.58.0	Nationwide Children's Hospital	22	HNSC	CDAF75AF-2712-4626-AE79-1550C203F028	12	TCGA	2016	NO	Not Available	Oral Tongue	TCGA-MT-A51X	375E4B96-49DA-4F65-9878-29F56FDA9C2E	28	-10976		0	34	Not Available																								Not Available	NOT HISPANIC OR LATINO
TCGA-MT-A67A-01A-11R-A30B-07	Tumor	TCGA-MT-A67A	311.57.0	Nationwide Children's Hospital	22	HNSC	6DD4FBFB-4F89-4A38-AE4E-4784C1747D32	12	TCGA	2016	YES	0	Oral Tongue	TCGA-MT-A67A	EDA7DF86-A344-4790-88AC-E1391F07F66D	21	-31161		0	392	Not Available																								Not Evaluated	NOT HISPANIC OR LATINO
TCGA-MT-A67D-01A-31R-A30B-07	Tumor	TCGA-MT-A67D	311.57.0	Nationwide Children's Hospital	22	HNSC	718D4BB3-A044-48DA-B0D6-B358BABEC06A	12	TCGA	2016	YES	0	Floor of mouth	TCGA-MT-A67D	11C944FC-9A49-4C00-AB8C-DA5DFD595244	21	-20386		0	56	Not Available																								Not Evaluated	NOT HISPANIC OR LATINO
TCGA-MT-A67F-01A-11R-A30B-07	Tumor	TCGA-MT-A67F	311.57.0	Nationwide Children's Hospital	22	HNSC	A951E6C7-11B9-462C-A780-56F5BCFE6E45	12	TCGA	2016	YES	0	Oral Cavity	TCGA-MT-A67F	50EE088A-5F74-466A-B9E7-7247F0A8D3E8	21	-22057		0	111	Not Available																								Not Evaluated	NOT HISPANIC OR LATINO
TCGA-MT-A7BN-01A-12R-A34R-07	Tumor	TCGA-MT-A7BN	355.48.0	Nationwide Children's Hospital	22	HNSC	D724D905-F52F-4290-97FD-55FCBC367D26	12	TCGA	2016	YES	0	Floor of mouth	TCGA-MT-A7BN	C060BDAB-DCE7-46B9-801C-48DFAB4FAD92	24	-27162		0	51	Not Available																								Unknown	Unknown
TCGA-MZ-A5BI-01A-31R-A34R-07	Tumor	TCGA-MZ-A5BI	355.48.0	Nationwide Children's Hospital	22	HNSC	9651F913-CF2D-424B-AA77-49D4DD1690C1	12	TCGA	2016	YES	0	Tonsil	TCGA-MZ-A5BI	FD7E2226-8086-4A56-867B-6457B87A7FED	28	-19500	217	0		Not Available	TCGA-MZ-A5BI-D62978	B2A96D32-1EE5-4A57-9353-DA3D56C909D7	Not Available	29	70	41	Cisplatin	Complete Response	7	Not Available	Not Available	Not Available	Not Available	Not Applicable	Not Available	Not Available	NO	Chemotherapy	Not Available	Not Available	Not Available	NO	2014	Not Evaluated	HISPANIC OR LATINO
TCGA-MZ-A6I9-01A-11R-A31N-07	Tumor	TCGA-MZ-A6I9	318.55.0	Nationwide Children's Hospital	22	HNSC	D06FF1FE-7BF1-4DFE-A854-A0AE4633AD48	12	TCGA	2016	YES	2	Base of tongue	TCGA-MZ-A6I9	AAD9A83A-AB62-47B0-990C-527CCDB58D63	12	-24939		0	254	Not Available	TCGA-MZ-A6I9-D59252;TCGA-MZ-A6I9-D59260;TCGA-MZ-A6I9-D59279;TCGA-MZ-A6I9-D59281	009B15C8-A754-424F-A9A6-9E2573853865;6D70EFC4-55DF-4730-8AD2-FBF6389BB96D;13A3859B-54D8-498C-B246-493D8E7F98BA;EB54E219-0F65-4571-A9D3-4A501BAB7642	Not Available;Not Available;Not Available;Not Available	7;7;7;7	99;421;449;449	57;365;449;449	Cisplatin;rigosertib;Carboplatin;Docetaxel	Complete Response;Clinical Progressive Disease;Clinical Progressive Disease;Clinical Progressive Disease	5;5;5;5	Not Available;Not Available;Not Available;Not Available	Not Available;Not Available;Not Available;Not Available	Not Available;Not Available;Not Available;Not Available	Not Available;Not Available;Not Available;Not Available	Not Applicable;Not Applicable;Not Applicable;Not Applicable	Not Available;Not Available;Not Available;Not Available	Not Available;Not Available;Not Available;Not Available	NO;NO;NO;NO	Chemotherapy;Targeted Molecular therapy;Chemotherapy;Chemotherapy	Not Available;Not Available;Not Available;Not Available	Not Available;Not Available;Not Available;Not Available	Not Available;Not Available;Not Available;Not Available	NO;YES;NO;NO	2014;2014;2014;2014	Not Evaluated	NOT HISPANIC OR LATINO
TCGA-MZ-A7D7-01A-21R-A34R-07	Tumor	TCGA-MZ-A7D7	355.48.0	Nationwide Children's Hospital	22	HNSC	E4A14458-B15B-4A1E-9DAD-8AAF08A8FF5F	12	TCGA	2016	YES	6	Base of tongue	TCGA-MZ-A7D7	06580CBC-D0D8-4B97-87EF-EBC17CDAE81C	30	-18974		0	240	Not Available	TCGA-MZ-A7D7-D56165;TCGA-MZ-A7D7-D68544;TCGA-MZ-A7D7-D68545	46EE99A3-9055-49CB-85CC-5E710923DCC3;2D46D5D9-AA58-415D-9AA6-F46A32CBF169;60DA6BFD-F3C6-4F84-83D2-6E0757B17DEA	Not Available;Not Available;Not Available	30;26;26	119;Not Available;Not Available	77;526;526	Cisplatin;Eribulin;Cetuximab	Complete Response;Not Available;Not Available	1;12;12	Not Available;Not Available;Not Available	Not Available;Not Available;Not Available	Not Available;Not Available;Not Available	Not Available;Not Available;Not Available	Not Applicable;Not Applicable;Not Applicable	Not Available;Not Available;Not Available	Not Available;Not Available;Not Available	NO;YES;YES	Chemotherapy;Chemotherapy;Targeted Molecular therapy	Not Available;Not Available;Not Available	Not Available;Not Available;Not Available	Not Available;Not Available;Not Available	NO;YES;YES	2014;2014;2014	Unknown	NOT HISPANIC OR LATINO
TCGA-P3-A5Q5-01A-11R-A28V-07	Tumor	TCGA-P3-A5Q5	301.57.0	Nationwide Children's Hospital	22	HNSC	51B0FF16-8891-4203-9225-761FB10AC308	12	TCGA	2016	YES	Not Available	Tonsil	TCGA-P3-A5Q5	3A867DF4-D548-4408-A90B-441DED53B7B6	4	-19728		0	910	Not Available																								Not Evaluated	NOT HISPANIC OR LATINO
TCGA-P3-A5Q6-01A-11R-A28V-07	Tumor	TCGA-P3-A5Q6	301.57.0	Nationwide Children's Hospital	22	HNSC	4C1252AC-6B90-4400-9501-1A2AB65097D2	12	TCGA	2016	YES	Not Available	Tonsil	TCGA-P3-A5Q6	451E4916-80EE-45F8-AD70-84340868A5A9	4	-17917	480	0		Not Available	TCGA-P3-A5Q6-D43798;TCGA-P3-A5Q6-D43799	B71ADE8C-6A2D-45B7-B690-2BF5B3F111F5;83FE780B-5F32-4B47-ABE0-E710B2CD1AC0	Not Available;Not Available	4;4	104;104	43;43	Cisplatin;Cetuximab	Complete Response;Complete Response	6;6	Not Available;Not Available	Not Available;Not Available	Not Available;Not Available	Not Available;Not Available	Not Applicable;Not Applicable	Not Available;Not Available	Not Available;Not Available	NO;NO	Chemotherapy;Chemotherapy	Not Available;Not Available	Not Available;Not Available	Not Available;Not Available	NO;NO	2013;2013	Not Evaluated	NOT HISPANIC OR LATINO
TCGA-P3-A5QA-01A-11R-A28V-07	Tumor	TCGA-P3-A5QA	301.57.0	Nationwide Children's Hospital	22	HNSC	7C8DE414-7678-4998-8C27-3C4A0AB7DA43	12	TCGA	2016	YES	Not Available	Oral Tongue	TCGA-P3-A5QA	80D51546-C046-4AF4-B3B3-B6BF5B1EAB02	4	-15125		0	1652	Not Available																								Not Evaluated	Unknown
TCGA-P3-A5QE-01A-11R-A28V-07	Tumor	TCGA-P3-A5QE	301.57.0	Nationwide Children's Hospital	22	HNSC	7F2F0F75-164F-4BC2-8130-80E544C6FE24	12	TCGA	2016	YES	Not Available	Base of tongue	TCGA-P3-A5QE	387DB1DF-EBAA-41C2-B036-F46AD61E313A	4	-18002		0	721	Not Available																								Not Evaluated	NOT HISPANIC OR LATINO
TCGA-P3-A5QF-01A-11R-A28V-07	Tumor	TCGA-P3-A5QF	301.57.0	Nationwide Children's Hospital	22	HNSC	815FB45C-1221-4D4A-B079-7729CB67BFEF	12	TCGA	2016	NO	Not Available	Alveolar Ridge	TCGA-P3-A5QF	4587AE9F-71FB-4582-82FF-FB407FEE6445	4	-18035	330	0		Not Available	TCGA-P3-A5QF-D43805	C5527910-F24A-4DF1-A793-F481B2570F78	Not Available	4	88	57	Cetuximab	Unknown	6	Not Available	Not Available	Not Available	Not Available	Not Applicable	Not Available	Not Available	NO	Chemotherapy	Not Available	Not Available	Not Available	NO	2013	Not Evaluated	NOT HISPANIC OR LATINO
TCGA-P3-A6SW-01A-11R-A34R-07	Tumor	TCGA-P3-A6SW	355.48.0	Nationwide Children's Hospital	22	HNSC	F1A9F0F0-B0CD-43FA-8BE5-D4C81C44C22D	12	TCGA	2016	YES	1	Tonsil	TCGA-P3-A6SW	3A2FE6DA-5F3C-4AD8-B735-23ADFFE3FD6B	21	-18536		0	1120	Not Available	TCGA-P3-A6SW-D50087	90C42460-FDE6-4995-AC15-978C9B51A501	Not Available	21	122	Not Available	Cisplatin	Complete Response	10	Not Available	Not Available	Not Available	Not Available	Not Applicable	Not Available	Not Available	NO	Chemotherapy	Not Available	Not Available	Not Available	NO	2013	Not Evaluated	NOT HISPANIC OR LATINO
TCGA-P3-A6SX-01A-11R-A34R-07	Tumor	TCGA-P3-A6SX	355.48.0	Nationwide Children's Hospital	22	HNSC	835749C7-585F-4C37-A9B2-3E00B3662522	12	TCGA	2016	YES	Not Available	Tonsil	TCGA-P3-A6SX	220D75AE-C94B-473A-A988-AC40C15FA219	21	-24715	1430	0		Not Available	TCGA-P3-A6SX-D50091	27CBE591-5B5B-4E08-9BA9-56385546BD37	Not Available	21	91	61	Not Available	Complete Response	10	Not Available	Not Available	Not Available	Not Available	Not Applicable	Not Available	Not Available	NO	Chemotherapy	Not Available	Not Available	Not Available	NO	2013	Not Evaluated	NOT HISPANIC OR LATINO
TCGA-P3-A6T0-01A-12R-A34R-07	Tumor	TCGA-P3-A6T0	355.48.0	Nationwide Children's Hospital	22	HNSC	38D3AA15-983E-42FE-A534-1DEF198883F7	12	TCGA	2016	YES	Not Available	Floor of mouth	TCGA-P3-A6T0	E3121DDE-EEE2-4975-A135-BDB89434A7E2	21	-17259		0	578	Not Available																								Not Evaluated	NOT HISPANIC OR LATINO
TCGA-P3-A6T2-01A-11R-A34R-07	Tumor	TCGA-P3-A6T2	355.48.0	Nationwide Children's Hospital	22	HNSC	49DC0A24-A234-4F0A-8708-385FC3549528	12	TCGA	2016	YES	4	Buccal Mucosa	TCGA-P3-A6T2	A563109D-0990-4BDC-8BD7-6766D1EADBDC	21	-16588		0	1917	Not Available	TCGA-P3-A6T2-D50101	B134B856-27DA-4175-8AEF-8BEFC4CE09B8	Not Available	21	91	30	Cisplatin	Complete Response	10	Not Available	Not Available	Not Available	Not Available	Not Applicable	Not Available	Not Available	NO	Chemotherapy	Not Available	Not Available	Not Available	NO	2013	Not Evaluated	NOT HISPANIC OR LATINO
TCGA-P3-A6T3-01A-11R-A34R-07	Tumor	TCGA-P3-A6T3	355.48.0	Nationwide Children's Hospital	22	HNSC	12545B6C-FAF3-4CB2-90EE-A8BBFA03AC5E	12	TCGA	2016	YES	Not Available	Oral Cavity	TCGA-P3-A6T3	13E936FF-81F0-49B9-BC2E-2EA43921F450	21	-18143	577	0		Not Available	TCGA-P3-A6T3-D50143	5FBB121D-7484-4EDC-B9D8-531A410C194D	Not Available	21	92	61	Cisplatin	Complete Response	10	Not Available	Not Available	Not Available	Not Available	Not Applicable	Not Available	Not Available	NO	Chemotherapy	Not Available	Not Available	Not Available	NO	2013	Not Evaluated	NOT HISPANIC OR LATINO
TCGA-P3-A6T4-01A-11R-A34R-07	Tumor	TCGA-P3-A6T4	355.48.0	Nationwide Children's Hospital	22	HNSC	5B226989-78EE-4D41-A3F1-F85A3EA3494F	12	TCGA	2016	YES	3.5	Floor of mouth	TCGA-P3-A6T4	C7885E34-D5DC-4256-A4AD-944A27DFCFC2	21	-20027	62	0		Not Available																								Not Evaluated	NOT HISPANIC OR LATINO
TCGA-P3-A6T5-01A-11R-A34R-07	Tumor	TCGA-P3-A6T5	355.48.0	Nationwide Children's Hospital	22	HNSC	7C766736-9A2A-4C8C-ABB3-1809D27FA6CB	12	TCGA	2016	YES	Not Available	Alveolar Ridge	TCGA-P3-A6T5	46625EBD-5BF3-4FE7-BF3F-19CC5A210555	21	-28977	882	0		Not Available																								Not Evaluated	NOT HISPANIC OR LATINO
TCGA-P3-A6T6-01A-11R-A34R-07	Tumor	TCGA-P3-A6T6	355.48.0	Nationwide Children's Hospital	22	HNSC	10FF673C-3830-48C1-9A3D-01AB4AE649E5	12	TCGA	2016	YES	1	Alveolar Ridge	TCGA-P3-A6T6	91D44093-D8D9-442C-92ED-E659C45B4E0A	21	-19694	395	0		Not Available	TCGA-P3-A6T6-D50156;TCGA-P3-A6T6-D50157	B47DEFB6-7DE6-45BF-88AB-2A193171149F;ED4A1471-8B9D-40FA-86E0-EF1C08EADB26	Not Available;Not Available	21;21	365;365	273;273	Cetuximab;Taxol	Clinical Progressive Disease;Clinical Progressive Disease	10;10	Not Available;Not Available	Not Available;Not Available	Not Available;Not Available	Not Available;Not Available	Not Applicable;Not Applicable	Not Available;Not Available	Not Available;Not Available	NO;NO	Chemotherapy;Chemotherapy	Not Available;Not Available	Not Available;Not Available	Not Available;Not Available	NO;NO	2013;2013	Not Evaluated	NOT HISPANIC OR LATINO
TCGA-P3-A6T7-01A-11R-A34R-07	Tumor	TCGA-P3-A6T7	355.48.0	Nationwide Children's Hospital	22	HNSC	3748B78C-9A19-472F-85D6-050FB61C5BA2	12	TCGA	2016	YES	6	Floor of mouth	TCGA-P3-A6T7	7CB42865-AF55-487D-B604-FAACE62BBA51	21	-20301	487	0		Not Available	TCGA-P3-A6T7-D50172	17CE025C-47EF-4C35-B1AA-551D7B71D8A6	Not Available	21	122	91	Cisplatin	Complete Response	10	Not Available	Not Available	Not Available	Not Available	Not Applicable	Not Available	Not Available	NO	Chemotherapy	Not Available	Not Available	Not Available	NO	2013	Not Evaluated	NOT HISPANIC OR LATINO
TCGA-P3-A6T8-01A-11R-A34R-07	Tumor	TCGA-P3-A6T8	355.48.0	Nationwide Children's Hospital	22	HNSC	AD8FFA82-1902-4A20-850D-5C6EEB47DBE6	12	TCGA	2016	YES	5	Floor of mouth	TCGA-P3-A6T8	8F1B904E-39A7-4870-B0F4-EFA1D43E50A8	21	-19754		0	400	Not Available	TCGA-P3-A6T8-D50176	931DA439-B763-4E21-BC67-2AC0E0FFD033	Not Available	21	122	92	Cisplatin	Complete Response	10	Not Available	Not Available	Not Available	Not Available	Not Applicable	Not Available	Not Available	NO	Chemotherapy	Not Available	Not Available	Not Available	NO	2013	Not Evaluated	NOT HISPANIC OR LATINO
TCGA-QK-A64Z-01A-11R-A30B-07	Tumor	TCGA-QK-A64Z	311.57.0	Nationwide Children's Hospital	22	HNSC	FE649BF2-0D37-4A43-A39C-11CAFF4101CC	12	TCGA	2016	YES	0	Hard Palate	TCGA-QK-A64Z	2915B26B-8C18-48E4-9715-A7E207F0A0E6	4	-29037		0	553	Not Available																								Not Evaluated	NOT HISPANIC OR LATINO
TCGA-QK-A652-01A-11R-A30B-07	Tumor	TCGA-QK-A652	311.57.0	Nationwide Children's Hospital	22	HNSC	753F4599-98D2-4EA6-A620-EEF092C2B584	12	TCGA	2016	YES	1	Oral Tongue	TCGA-QK-A652	49EB77F3-F7D8-4E98-9F91-547543028877	4	-22023		0	259	Not Available																								Not Evaluated	NOT HISPANIC OR LATINO
TCGA-QK-A6IF-01A-11R-A31N-07	Tumor	TCGA-QK-A6IF	318.55.0	Nationwide Children's Hospital	22	HNSC	FC720030-86CA-418D-9430-7D56CC4ACEF9	12	TCGA	2016	YES	2	Tonsil	TCGA-QK-A6IF	22AE99B4-52CF-4D20-A068-7457E16919B6	24	-22463		0	245	Not Available	TCGA-QK-A6IF-D48967;TCGA-QK-A6IF-D54877	D07A6E9C-1FC4-4110-A6C8-E48562632703;4910BF75-4B3C-44EA-8EC9-1567B5AAA6E7	Not Available;Not Available	24;23	63;63	17;17	Carboplatin;Paclitaxel	Complete Response;Complete Response	9;12	Not Available;Not Available	Not Available;Not Available	Not Available;Not Available	Not Available;Not Available	Not Applicable;Not Applicable	Not Available;Not Available	Not Available;Not Available	NO;NO	Chemotherapy;Chemotherapy	Not Available;Not Available	Not Available;Not Available	Not Available;Not Available	NO;NO	2013;2013	Not Evaluated	NOT HISPANIC OR LATINO
TCGA-QK-A6IG-01A-11R-A31N-07	Tumor	TCGA-QK-A6IG	318.55.0	Nationwide Children's Hospital	22	HNSC	E2020C5F-5204-47C4-9EF7-CEE5539A28BF	12	TCGA	2016	YES	Not Available	Buccal Mucosa	TCGA-QK-A6IG	3203D0AE-5FE9-4FF2-BE0A-1D97F7684819	24	-25334		0	218	Not Available	TCGA-QK-A6IG-D48980;TCGA-QK-A6IG-D54916	15D66913-F58A-49F3-B1C6-26BBEBE16A27;D8A6EDE4-2CF3-4796-8B5C-0CBC47C2817C	Not Available;Not Available	24;23	98;98	51;51	Carboplatin;Paclitaxel	Clinical Progressive Disease;Clinical Progressive Disease	9;12	Not Available;Not Available	Not Available;Not Available	Not Available;Not Available	Not Available;Not Available	Not Applicable;Not Applicable	Not Available;Not Available	Not Available;Not Available	NO;NO	Chemotherapy;Chemotherapy	Not Available;Not Available	Not Available;Not Available	Not Available;Not Available	NO;NO	2013;2013	Not Evaluated	NOT HISPANIC OR LATINO
TCGA-QK-A6IH-01A-11R-A31N-07	Tumor	TCGA-QK-A6IH	318.55.0	Nationwide Children's Hospital	22	HNSC	43F4E81C-B6C9-4849-ABB1-F80F375D79B0	12	TCGA	2016	YES	Not Available	Alveolar Ridge	TCGA-QK-A6IH	C1F286F6-D4A1-494A-88C8-FF8E2A3DF2CE	24	-23936		0	228	Not Available	TCGA-QK-A6IH-D48993;TCGA-QK-A6IH-D54921;TCGA-QK-A6IH-D66626;TCGA-QK-A6IH-D66628;TCGA-QK-A6IH-D66631	34F872C4-F666-475A-8F59-505BAF0D5C35;00D9CF82-0A61-40A4-AAE9-A575F284A82A;3774462C-1318-453E-AC1C-BA0773F7D228;184CB90B-679D-49AD-BA58-9D154511A26D;A69AB28B-73B3-4939-AEA7-8E28FA2E7BAA	Not Available;Not Available;Not Available;Not Available;Not Available	24;23;21;21;21	84;84;396;396;396	49;49;Not Available;Not Available;Not Available	Carboplatin;Paclitaxel;Carboplatin;5-Fluorouracil;Erbitux	Clinical Progressive Disease;Clinical Progressive Disease;Stable Disease;Stable Disease;Stable Disease	9;12;10;10;10	Not Available;Not Available;Not Available;Not Available;Not Available	Not Available;Not Available;Not Available;Not Available;Not Available	Not Available;Not Available;Not Available;Not Available;Not Available	Not Available;Not Available;Not Available;Not Available;Not Available	Not Applicable;Not Applicable;Not Applicable;Not Applicable;Not Applicable	Not Available;Not Available;Not Available;Not Available;Not Available	Not Available;Not Available;Not Available;Not Available;Not Available	NO;NO;NO;NO;NO	Chemotherapy;Chemotherapy;Chemotherapy;Chemotherapy;Targeted Molecular therapy	Not Available;Not Available;Not Available;Not Available;Not Available	Not Available;Not Available;Not Available;Not Available;Not Available	Not Available;Not Available;Not Available;Not Available;Not Available	NO;NO;NO;NO;NO	2013;2013;2014;2014;2014	Not Evaluated	NOT HISPANIC OR LATINO
TCGA-QK-A6II-01A-11R-A31N-07	Tumor	TCGA-QK-A6II	318.55.0	Nationwide Children's Hospital	22	HNSC	87FC8CB4-AE45-4BB3-B476-B0B2E3C330D1	12	TCGA	2016	YES	Not Available	Floor of mouth	TCGA-QK-A6II	3AEA4CF5-ADE6-4747-B1D1-C431564F5FA6	25	-19113		0	225	Not Available	TCGA-QK-A6II-D49014;TCGA-QK-A6II-D66694;TCGA-QK-A6II-D66697;TCGA-QK-A6II-D66701	A4738C8D-9E4F-4B14-8E83-5928D179CB6A;4D656185-33C7-49CB-B9C7-78A4DD88EE23;496E7790-5648-4031-8700-B1B8DE9B9A0D;BA82D367-59CA-4E0C-A97C-10CEB28623A6	Not Available;Not Available;Not Available;Not Available	25;22;22;22	99;183;183;183	57;183;183;183	Cisplatin;Carboplatin;Paclitaxel;Erbitux	Unknown;Clinical Progressive Disease;Clinical Progressive Disease;Clinical Progressive Disease	9;10;10;10	Not Available;Not Available;Not Available;Not Available	Not Available;Not Available;Not Available;Not Available	Not Available;Not Available;Not Available;Not Available	Not Available;Not Available;Not Available;Not Available	Not Applicable;Not Applicable;Not Applicable;Not Applicable	Not Available;Not Available;Not Available;Not Available	Not Available;Not Available;Not Available;Not Available	NO;NO;NO;NO	Chemotherapy;Chemotherapy;Chemotherapy;Targeted Molecular therapy	Not Available;Not Available;Not Available;Not Available	Not Available;Not Available;Not Available;Not Available	Not Available;Not Available;Not Available;Not Available	NO;NO;NO;NO	2013;2014;2014;2014	Not Evaluated	NOT HISPANIC OR LATINO
TCGA-QK-A6IJ-01A-11R-A31N-07	Tumor	TCGA-QK-A6IJ	318.55.0	Nationwide Children's Hospital	22	HNSC	E4F2BA69-93C8-4F43-8612-38E6AF8DE139	12	TCGA	2016	YES	Not Available	Floor of mouth	TCGA-QK-A6IJ	BDC0A7F5-D0F9-4008-BF4C-51E570CA1EBC	25	-25966		0	64	Not Available																								Not Evaluated	NOT HISPANIC OR LATINO
TCGA-QK-A6V9-01A-11R-A34R-07	Tumor	TCGA-QK-A6V9	355.48.0	Nationwide Children's Hospital	22	HNSC	AB2F622A-99D0-4698-8FD5-3044294F680A	12	TCGA	2016	NO	Not Available	Tonsil	TCGA-QK-A6V9	DCB27E14-14EF-42B2-B9A6-7E26C5AFA869	6	-20461		0	567	Not Available																								Not Evaluated	NOT HISPANIC OR LATINO
TCGA-QK-A6VB-01A-12R-A34R-07	Tumor	TCGA-QK-A6VB	355.48.0	Nationwide Children's Hospital	22	HNSC	717072CE-D211-484C-8906-1FA99ACAF359	12	TCGA	2016	NO	Not Available	Floor of mouth	TCGA-QK-A6VB	63D646E2-60AA-4BD5-B2ED-6254C9C51BE4	6	-24144		0	156	Not Available																								Not Evaluated	NOT HISPANIC OR LATINO
TCGA-QK-A6VC-01A-23R-A34R-07	Tumor	TCGA-QK-A6VC	355.48.0	Nationwide Children's Hospital	22	HNSC	3D237F81-B52A-4DCE-ADCA-789BFBE563DA	12	TCGA	2016	NO	Not Available	Hypopharynx	TCGA-QK-A6VC	3E49A2B8-9B2C-4D15-9773-24DF8B4AB2FD	6	-22865		0	106	Not Available																								Not Evaluated	NOT HISPANIC OR LATINO
TCGA-QK-A8Z7-01A-11R-A39I-07	Tumor	TCGA-QK-A8Z7	403.37.0	Nationwide Children's Hospital	22	HNSC	635B9CFA-DD99-409F-81BC-62B88FC2474B	12	TCGA	2016	YES	0	Floor of mouth	TCGA-QK-A8Z7	2C878227-77A1-4988-A46C-885DB9E400F7	14	-21711		0	23	Not Available	TCGA-QK-A8Z7-D63234;TCGA-QK-A8Z7-D63235	9ADF32C7-F5CA-4A84-AD80-CB89A18B3ABA;51B88D02-9EEE-49D3-8FB7-DA50B9A64A25	Not Available;Not Available	4;4	166;166	105;105	Carboplatin;Paclitaxel	Complete Response;Complete Response	8;8	Not Available;Not Available	Not Available;Not Available	Not Available;Not Available	Not Available;Not Available	Not Applicable;Not Applicable	Not Available;Not Available	Not Available;Not Available	NO;NO	Chemotherapy;Chemotherapy	Not Available;Not Available	Not Available;Not Available	Not Available;Not Available	NO;NO	2014;2014	Not Evaluated	NOT HISPANIC OR LATINO
TCGA-QK-A8Z8-01A-11R-A39I-07	Tumor	TCGA-QK-A8Z8	403.37.0	Nationwide Children's Hospital	22	HNSC	2A2D03FE-FBCB-4028-BEC7-321B274D0641	12	TCGA	2016	YES	12	Larynx	TCGA-QK-A8Z8	AC511727-185B-4AC0-B6C0-DC3A79657BE6	14	-22107	171	0		Not Available	TCGA-QK-A8Z8-D58555;TCGA-QK-A8Z8-D58556;TCGA-QK-A8Z8-D58558	3B628E0F-5450-40B6-9AFC-74089147F0CE;692C8635-41A2-4E05-B2D5-F946DA23A230;4540AF1A-FB4C-479D-8FA3-ADAAD2358055	Not Available;Not Available;Not Available	14;14;14	157;157;157	157;157;157	Docetaxel;Cisplatin;5-Fluorouracil	Unknown;Unknown;Unknown	4;4;4	Not Available;Not Available;Not Available	Not Available;Not Available;Not Available	Not Available;Not Available;Not Available	Not Available;Not Available;Not Available	Not Applicable;Not Applicable;Not Applicable	Not Available;Not Available;Not Available	Not Available;Not Available;Not Available	NO;NO;NO	Chemotherapy;Chemotherapy;Chemotherapy	Not Available;Not Available;Not Available	Not Available;Not Available;Not Available	Not Available;Not Available;Not Available	NO;NO;NO	2014;2014;2014	Not Evaluated	NOT HISPANIC OR LATINO
TCGA-QK-A8Z9-01B-11R-A39I-07	Tumor	TCGA-QK-A8Z9	403.37.0	Nationwide Children's Hospital	22	HNSC	348F9DCB-F086-4442-803C-60F7B2CAAAA8	12	TCGA	2016	YES	Not Available	Floor of mouth	TCGA-QK-A8Z9	8980FB06-E38D-459F-A777-52048D492DEF	14	-20471		0	149	Not Available	TCGA-QK-A8Z9-D58569;TCGA-QK-A8Z9-D58570;TCGA-QK-A8Z9-D67697;TCGA-QK-A8Z9-D67732	28AACA3B-F335-40D2-8947-6C8AF80A6707;A9932136-BD96-46A5-B4AC-1DA523473034;9AA6720E-3B6D-4446-81B7-E469AE00ADF4;47D68D99-87A9-44E5-A131-A5D7758873C9	Not Available;Not Available;Not Available;Not Available	14;14;9;10	102;102;302;302	50;50;267;267	Carboplatin;Paclitaxel;Carboplatin;Paclitaxel	Complete Response;Complete Response;Unknown;Unknown	4;4;11;11	Not Available;Not Available;Not Available;Not Available	Not Available;Not Available;Not Available;Not Available	Not Available;Not Available;Not Available;Not Available	Not Available;Not Available;Not Available;Not Available	Not Applicable;Not Applicable;Not Applicable;Not Applicable	Not Available;Not Available;Not Available;Not Available	Not Available;Not Available;Not Available;Not Available	NO;NO;NO;NO	Chemotherapy;Chemotherapy;Chemotherapy;Chemotherapy	Not Available;Not Available;Not Available;Not Available	Not Available;Not Available;Not Available;Not Available	Not Available;Not Available;Not Available;Not Available	NO;NO;NO;NO	2014;2014;2014;2014	Not Evaluated	NOT HISPANIC OR LATINO
TCGA-QK-A8ZA-01A-11R-A39I-07	Tumor	TCGA-QK-A8ZA	403.37.0	Nationwide Children's Hospital	22	HNSC	4739CA96-D9C6-4833-A99D-39745C4F68B8	12	TCGA	2016	YES	3	Oropharynx	TCGA-QK-A8ZA	86A5C819-49E9-4B06-B43D-0F0C06A935FD	14	-21979		0	135	Not Available	TCGA-QK-A8ZA-D58573	810E071C-2BDB-4F0B-AD71-D043F4E6864A	Not Available	14	118	71	Cisplatin	Unknown	4	Not Available	Not Available	Not Available	Not Available	Not Applicable	Not Available	Not Available	NO	Chemotherapy	Not Available	Not Available	Not Available	NO	2014	Not Evaluated	NOT HISPANIC OR LATINO
TCGA-QK-A8ZB-01A-11R-A39I-07	Tumor	TCGA-QK-A8ZB	403.37.0	Nationwide Children's Hospital	22	HNSC	E2E903BC-AE0C-4244-B29B-2115FE7DE149	12	TCGA	2016	YES	0	Larynx	TCGA-QK-A8ZB	3D2FF6C0-8C03-440D-8EC1-231862BD6713	14	-25192		0	135	Not Available																								Not Evaluated	NOT HISPANIC OR LATINO
TCGA-QK-AA3J-01A-11R-A39I-07	Tumor	TCGA-QK-AA3J	403.37.0	Nationwide Children's Hospital	22	HNSC	5145B90F-CDC0-4D20-95D2-058F51DFF44D	12	TCGA	2016	NO	Not Available	Larynx	TCGA-QK-AA3J	677C9D22-E518-43AB-9668-A606C35A6EEB	5	-25469		0	157	Not Available																								Not Evaluated	NOT HISPANIC OR LATINO
TCGA-QK-AA3K-01A-11R-A39I-07	Tumor	TCGA-QK-AA3K	403.37.0	Nationwide Children's Hospital	22	HNSC	6532E65B-544D-43E9-9E10-6180698F834E	12	TCGA	2016	YES	Not Available	Oral Tongue	TCGA-QK-AA3K	09F6C3AB-B799-404A-B301-22B9CAF33E82	9	-22093		0	168	Not Available	TCGA-QK-AA3K-D60423	9248E69A-EE96-450F-9065-EDDA623DD206	Not Available	9	145	120	Cisplatin	Unknown	6	Not Available	Not Available	Not Available	Not Available	Not Applicable	Not Available	Not Available	NO	Chemotherapy	Not Available	Not Available	Not Available	NO	2014	Not Evaluated	NOT HISPANIC OR LATINO
TCGA-RS-A6TO-01A-32R-A34R-07	Tumor	TCGA-RS-A6TO	355.48.0	Nationwide Children's Hospital	22	HNSC	41F8A245-2EC7-446C-B2E2-62DE32EF2766	12	TCGA	2016	NO	Not Available	Oral Cavity	TCGA-RS-A6TO	B815FAE9-C595-4C76-ACC6-6D38B9AF9578	10	-30104		0	272	Not Available	TCGA-RS-A6TO-D57157	4C52111A-C482-474B-A76A-E10E8346E244	Not Available	10	41	41	Cetuximab	Complete Response	3	Not Available	Not Available	Not Available	Not Available	Not Applicable	Not Available	Not Available	NO	Immunotherapy	Not Available	Not Available	Not Available	NO	2014	Not Evaluated	NOT HISPANIC OR LATINO
TCGA-RS-A6TP-01A-12R-A34R-07	Tumor	TCGA-RS-A6TP	355.48.0	Nationwide Children's Hospital	22	HNSC	225B9304-BA6A-4B9A-A579-A82866E4CB97	12	TCGA	2016	YES	0	Tonsil	TCGA-RS-A6TP	5436B002-4E4F-4D0F-9566-C0EF4D2D1854	10	-21393		0	236	Not Available																								Not Evaluated	NOT HISPANIC OR LATINO
TCGA-T2-A6WX-01A-12R-A34R-07	Tumor	TCGA-T2-A6WX	355.48.0	Nationwide Children's Hospital	22	HNSC	9140253F-E5CB-42EA-B4E4-48DC3ED8C34F	12	TCGA	2016	YES	0	Oral Tongue	TCGA-T2-A6WX	8B9E81DA-EA22-4F6A-BDB1-281B0EC8A451	30	-27005	209	0		Not Available	TCGA-T2-A6WX-D50752;TCGA-T2-A6WX-D50753;TCGA-T2-A6WX-D50754	B9E77C04-E6CA-4FEF-B4F4-2188EEE920DD;DD3FD6F9-5E1B-492B-9188-E3787EF58B65;8466B93A-61FF-4DA0-8E3E-79BF58ED4414	Not Available;Not Available;Not Available	30;30;30	92;92;92	71;71;71	carboplatin;paclitaxel;cetuximab	Clinical Progressive Disease;Clinical Progressive Disease;Clinical Progressive Disease	10;10;10	Not Available;Not Available;Not Available	Not Available;Not Available;Not Available	Not Available;Not Available;Not Available	Not Available;Not Available;Not Available	Not Applicable;Not Applicable;Not Applicable	Not Available;Not Available;Not Available	Not Available;Not Available;Not Available	NO;NO;NO	Chemotherapy;Chemotherapy;Chemotherapy	Not Available;Not Available;Not Available	Not Available;Not Available;Not Available	Not Available;Not Available;Not Available	NO;NO;NO	2013;2013;2013	Not Evaluated	NOT HISPANIC OR LATINO
TCGA-T2-A6WZ-01A-21R-A34R-07	Tumor	TCGA-T2-A6WZ	355.48.0	Nationwide Children's Hospital	22	HNSC	43FCC222-4CC7-4CF5-B8C0-804A2B5DA390	12	TCGA	2016	YES	3.5	Oral Tongue	TCGA-T2-A6WZ	93CBDA0F-8454-4127-A6DA-A19DDA345DEB	21	-19397	484	0		Not Available	TCGA-T2-A6WZ-D50293;TCGA-T2-A6WZ-D50299;TCGA-T2-A6WZ-D50327	B1E26606-2BEE-4A12-AFF8-5D503576D0C1;1338CC83-0121-4F93-A0D2-2C4D9D09A8BE;03FF8C25-E9D2-48DB-B0B7-91EB1EDDB840	pi3K inhibitor;Not Available;Not Available	21;21;22	303;303;163	247;247;128	px-866;docetaxel;cetuximab	Stable Disease;Stable Disease;Clinical Progressive Disease	10;10;10	Not Available;Not Available;Not Available	Not Available;Not Available;Not Available	Not Available;Not Available;Not Available	Not Available;Not Available;Not Available	Not Applicable;Not Applicable;Not Applicable	Not Available;Not Available;Not Available	Not Available;Not Available;Not Available	NO;NO;NO	Targeted Molecular therapy;Chemotherapy;Chemotherapy	Not Available;Not Available;Not Available	Not Available;Not Available;Not Available	Not Available;Not Available;Not Available	YES;YES;NO	2013;2013;2013	Not Evaluated	NOT HISPANIC OR LATINO
TCGA-T2-A6X0-01A-11R-A34R-07	Tumor	TCGA-T2-A6X0	355.48.0	Nationwide Children's Hospital	22	HNSC	6BCB75F3-03D2-4DA1-9D76-06CE7A2A3FEC	12	TCGA	2016	YES	0	Tonsil	TCGA-T2-A6X0	FF38628E-8ABE-44D6-8D3B-7CFE46BD2E35	21	-18114		0	216	Not Available	TCGA-T2-A6X0-D49735	FC96B3A3-F5E0-44D7-B386-042B36E43162	Not Available	21	95	60	cisplatin	Complete Response	10	Not Available	Not Available	Not Available	Not Available	Not Applicable	Not Available	Not Available	NO	Chemotherapy	Not Available	Not Available	Not Available	NO	2013	Not Evaluated	NOT HISPANIC OR LATINO
TCGA-T2-A6X2-01A-12R-A34R-07	Tumor	TCGA-T2-A6X2	355.48.0	Nationwide Children's Hospital	22	HNSC	92BDAF46-3BE8-44CA-A724-279EA9A2C69C	12	TCGA	2016	YES	0	Alveolar Ridge	TCGA-T2-A6X2	731F6967-5A01-40B7-9F88-64D980214BB2	22	-30013		0	987	Not Available																								Not Evaluated	NOT HISPANIC OR LATINO
TCGA-T3-A92M-01A-31R-A39I-07	Tumor	TCGA-T3-A92M	403.37.0	Nationwide Children's Hospital	22	HNSC	218A507F-52AC-4557-83F6-EC6E4580DEC8	12	TCGA	2016	NO	Not Available	Larynx	TCGA-T3-A92M	DBDEB4CA-F67C-4D89-AF60-88B425EBE461	31	-19247		0	0	Not Available																								Not Evaluated	NOT HISPANIC OR LATINO
TCGA-T3-A92N-01A-11R-A39I-07	Tumor	TCGA-T3-A92N	403.37.0	Nationwide Children's Hospital	22	HNSC	F9170DB7-8BFA-46C8-822F-52BA547B72B5	12	TCGA	2016	NO	Not Available	Floor of mouth	TCGA-T3-A92N	DB873DBD-D0C0-4A19-80E5-963DCFAF823E	27	-28879		0	-2	Not Available																								Not Evaluated	NOT HISPANIC OR LATINO
TCGA-TN-A7HI-01A-11R-A34R-07	Tumor	TCGA-TN-A7HI	355.48.0	Nationwide Children's Hospital	22	HNSC	B193CA95-5F84-4C82-A295-010AA3DF55C3	12	TCGA	2016	YES	Not Available	Tonsil	TCGA-TN-A7HI	896F5DCC-D076-4E1F-AE7C-52D21109DA7B	14	-20666		0	146	Not Available																								Not Evaluated	NOT HISPANIC OR LATINO
TCGA-TN-A7HJ-01A-12R-A34R-07	Tumor	TCGA-TN-A7HJ	355.48.0	Nationwide Children's Hospital	22	HNSC	F5CEE9A7-BBC6-4595-B5BE-649B54C4CC89	12	TCGA	2016	NO	Not Available	Larynx	TCGA-TN-A7HJ	B3DBF9AD-9602-4E44-BEAC-1CFA5F8BBA5D	14	-18809		0	184	Not Available	TCGA-TN-A7HJ-D65225	A1722FCD-DE8D-4C67-AAD0-56F66AC25A07	Not Available	23	92	31	Cisplatin	Complete Response	9	Not Available	Not Available	Not Available	Not Available	Not Applicable	Not Available	Not Available	NO	Chemotherapy	Not Available	Not Available	Not Available	NO	2014	Not Evaluated	NOT HISPANIC OR LATINO
TCGA-TN-A7HL-01A-11R-A34R-07	Tumor	TCGA-TN-A7HL	355.48.0	Nationwide Children's Hospital	22	HNSC	42184577-E732-4654-B4A7-BA9EE645C8E5	12	TCGA	2016	YES	2	Hypopharynx	TCGA-TN-A7HL	4B50AEA4-4AD1-4BF6-9CF1-984C28A99C84	13	-21731		0	153	Not Available	TCGA-TN-A7HL-D65230	B3AB0570-937F-45FD-9E04-FD0041693492	Not Available	23	62	35	Cisplatin	Complete Response	9	Not Available	Not Available	Not Available	Not Available	Not Applicable	Not Available	Not Available	NO	Chemotherapy	Not Available	Not Available	Not Available	NO	2014	Not Evaluated	NOT HISPANIC OR LATINO
TCGA-UF-A718-01A-22R-A34R-07	Tumor	TCGA-UF-A718	355.48.0	Nationwide Children's Hospital	22	HNSC	1662B968-F002-47F0-81F3-9C07D2CAFDB6	12	TCGA	2016	NO	Not Available	Larynx	TCGA-UF-A718	2135B007-B714-495B-9B30-92010179EC33	16	-22836		0	1326	Not Available																								Not Evaluated	Not Evaluated
TCGA-UF-A719-01A-12R-A34R-07	Tumor	TCGA-UF-A719	355.48.0	Nationwide Children's Hospital	22	HNSC	E1E259CA-9B2D-4D74-9640-AFECD4C2DF82	12	TCGA	2016	YES	Not Available	Floor of mouth	TCGA-UF-A719	B295A542-F5B3-4B81-84ED-3704B944A8E3	16	-19797		0	1337	Not Available																								Not Evaluated	Not Evaluated
TCGA-UF-A71A-01A-22R-A34R-07	Tumor	TCGA-UF-A71A	355.48.0	Nationwide Children's Hospital	22	HNSC	AC5D38E2-238C-49A6-8518-48FCC7AFE1CB	12	TCGA	2016	NO	Not Available	Floor of mouth	TCGA-UF-A71A	2C7F1035-5C8C-4C49-8B9B-2F1233896530	24	-24623	86	0		Not Available																								Not Evaluated	Not Evaluated
TCGA-UF-A71A-06A-11R-A39I-07	Tumor	TCGA-UF-A71A	355.48.0	Nationwide Children's Hospital	22	HNSC	AC5D38E2-238C-49A6-8518-48FCC7AFE1CB	12	TCGA	2016	NO	Not Available	Floor of mouth	TCGA-UF-A71A	2C7F1035-5C8C-4C49-8B9B-2F1233896530	24	-24623	86	0		Not Available																								Not Evaluated	Not Evaluated
TCGA-UF-A71B-01A-12R-A34R-07	Tumor	TCGA-UF-A71B	355.48.0	Nationwide Children's Hospital	22	HNSC	466E9E18-19DA-421E-B59F-E6B8BEDEE485	12	TCGA	2016	YES	Not Available	Alveolar Ridge	TCGA-UF-A71B	A71B425B-CCD3-42F0-8163-3721CB1794EF	5	-18404		0	1158	Not Available																								Not Evaluated	Not Evaluated
TCGA-UF-A71D-01A-12R-A34R-07	Tumor	TCGA-UF-A71D	355.48.0	Nationwide Children's Hospital	22	HNSC	FCE6F929-82E4-4301-BB58-F13C583E0E09	12	TCGA	2016	YES	Not Available	Larynx	TCGA-UF-A71D	32AAC152-322B-4D7F-A78B-448FECDF17BF	5	-19747		0	986	Not Available																								Not Evaluated	Not Evaluated
TCGA-UF-A71E-01A-31R-A34R-07	Tumor	TCGA-UF-A71E	355.48.0	Nationwide Children's Hospital	22	HNSC	01E6C31B-C42A-40BB-AA6D-867990697034	12	TCGA	2016	YES	Not Available	Floor of mouth	TCGA-UF-A71E	119EA204-792B-49EC-8FD4-EB88C4F91042	5	-23071		0	1090	Not Available																								Not Evaluated	Not Evaluated
TCGA-UF-A7J9-01A-12R-A34R-07	Tumor	TCGA-UF-A7J9	355.48.0	Nationwide Children's Hospital	22	HNSC	AB50CBE2-EDBF-46C1-A469-ED533E44F6FF	12	TCGA	2016	YES	33	Larynx	TCGA-UF-A7J9	82C47F60-B863-45F9-82DC-72D89753F4B1	2	-27459		0	1043	Not Available																								Not Evaluated	Not Evaluated
TCGA-UF-A7JA-01A-12R-A34R-07	Tumor	TCGA-UF-A7JA	355.48.0	Nationwide Children's Hospital	22	HNSC	B7880606-8E6B-48D3-8D0F-0C4D0D68E6BA	12	TCGA	2016	YES	Not Available	Buccal Mucosa	TCGA-UF-A7JA	97C3C5DC-5540-4713-805E-4D98FD8C03AD	2	-24121		0	1894	Not Available																								Not Evaluated	Not Evaluated
TCGA-UF-A7JC-01A-21R-A34R-07	Tumor	TCGA-UF-A7JC	355.48.0	Nationwide Children's Hospital	22	HNSC	741239A8-1681-4539-A8E7-5866E99265F9	12	TCGA	2016	NO	Not Available	Floor of mouth	TCGA-UF-A7JC	545C9F09-DF14-4302-B131-519D141438D1	2	-15452		0	484	Not Available	TCGA-UF-A7JC-D60396	ACA937EB-EA78-4861-9C8F-A59D61AFACFA	Not Available	9	173	131	Cisplatin	Complete Response	6	Not Available	Not Available	Not Available	Not Available	Not Applicable	Not Available	Not Available	NO	Chemotherapy	Not Available	Not Available	Not Available	NO	2014	Not Evaluated	Not Evaluated
TCGA-UF-A7JD-01A-11R-A34R-07	Tumor	TCGA-UF-A7JD	355.48.0	Nationwide Children's Hospital	22	HNSC	2BE7D33B-8D1E-4DAB-85E4-1F02A19A338B	12	TCGA	2016	YES	Not Available	Buccal Mucosa	TCGA-UF-A7JD	D947828F-D62F-426B-9710-3C93A7AEF05B	17	-26101		0	653	Not Available																								Not Evaluated	Not Evaluated
TCGA-UF-A7JF-01A-11R-A34R-07	Tumor	TCGA-UF-A7JF	355.48.0	Nationwide Children's Hospital	22	HNSC	5B9D6E27-6AB2-4766-9DA7-9D5066B3D883	12	TCGA	2016	YES	Not Available	Larynx	TCGA-UF-A7JF	3BD2FCEE-5B16-49F3-A717-F1E106BBC12F	2	-29468		0	1266	Not Available	TCGA-UF-A7JF-D61376	CECD3B5E-EFBB-4887-BD87-698128E8CA5D	Not Available	28	86	71	Cisplatin	Complete Response	6	Not Available	Not Available	Not Available	Not Available	Not Applicable	Not Available	Not Available	NO	Chemotherapy	Not Available	Not Available	Not Available	NO	2014	Not Evaluated	Not Evaluated
TCGA-UF-A7JH-01A-21R-A34R-07	Tumor	TCGA-UF-A7JH	355.48.0	Nationwide Children's Hospital	22	HNSC	005562D0-ECE4-462F-B7F1-E4F22AE2DC75	12	TCGA	2016	YES	Not Available	Larynx	TCGA-UF-A7JH	0ABE0B8F-FD93-43E8-B78F-48A7C3F96868	2	-21558		0	469	Not Available																								Not Evaluated	Not Evaluated
TCGA-UF-A7JJ-01A-11R-A34R-07	Tumor	TCGA-UF-A7JJ	355.48.0	Nationwide Children's Hospital	22	HNSC	93E2B4EF-6F28-4B36-B17D-0C9B6033CC5C	12	TCGA	2016	NO	Not Available	Larynx	TCGA-UF-A7JJ	68F612B7-33B4-4CA4-B012-439BFD598888	2	-25201		0	214	Not Available	TCGA-UF-A7JJ-D61379	563F9629-9C8D-427B-A688-8E030C041F9C	Not Available	28	102	60	Cisplatin	Complete Response	6	Not Available	Not Available	Not Available	Not Available	Not Applicable	Not Available	Not Available	NO	Chemotherapy	Not Available	Not Available	Not Available	NO	2014	Not Evaluated	Not Evaluated
TCGA-UF-A7JK-01A-11R-A34R-07	Tumor	TCGA-UF-A7JK	355.48.0	Nationwide Children's Hospital	22	HNSC	D1B0DFFC-12F8-4450-9212-BBC4925DB64F	12	TCGA	2016	YES	Not Available	Larynx	TCGA-UF-A7JK	1CA54115-93A3-4C0E-ABF0-915B4BBFF10C	2	-21696	424	0		Not Available	TCGA-UF-A7JK-D61371	76455436-956B-48B1-8EC1-A59BF38E804C	Not Available	28	174	132	Cisplatin	Complete Response	6	Not Available	Not Available	Not Available	Not Available	Not Applicable	Not Available	Not Available	NO	Chemotherapy	Not Available	Not Available	Not Available	NO	2014	Not Evaluated	Not Evaluated
TCGA-UF-A7JO-01A-11R-A34R-07	Tumor	TCGA-UF-A7JO	355.48.0	Nationwide Children's Hospital	22	HNSC	C5C27161-45DE-4500-9403-C4B4D4CAD470	12	TCGA	2016	NO	Not Available	Floor of mouth	TCGA-UF-A7JO	55DEAB98-29C3-45A1-BC13-BCE3F13AD481	2	-28951	631	0		Not Available																								Not Evaluated	Not Evaluated
TCGA-UF-A7JS-01A-11R-A34R-07	Tumor	TCGA-UF-A7JS	355.48.0	Nationwide Children's Hospital	22	HNSC	7E3DDBF5-5CA2-4697-9523-16303273AC3E	12	TCGA	2016	YES	Not Available	Oral Tongue	TCGA-UF-A7JS	1BC03593-5AB6-4082-B157-7EA456845E28	2	-21676		0	413	Not Available																								Not Evaluated	Not Evaluated
TCGA-UF-A7JT-01A-11R-A34R-07	Tumor	TCGA-UF-A7JT	355.48.0	Nationwide Children's Hospital	22	HNSC	30CEBCE6-D3E7-4A5E-A389-BB137DA278ED	12	TCGA	2016	NO	Not Available	Floor of mouth	TCGA-UF-A7JT	12DA9527-CF33-46C6-90CF-65478FF15CF9	2	-26375	993	0		Not Available	TCGA-UF-A7JT-D61384	2D947D8B-A1DA-44E7-8952-C35E22BA5F20	Not Available	28	229	173	Cisplatin	Complete Response	6	Not Available	Not Available	Not Available	Not Available	Not Applicable	Not Available	Not Available	NO	Chemotherapy	Not Available	Not Available	Not Available	NO	2014	Not Evaluated	Not Evaluated
TCGA-UF-A7JV-01A-11R-A34R-07	Tumor	TCGA-UF-A7JV	355.48.0	Nationwide Children's Hospital	22	HNSC	5114AE19-2110-4D05-A59F-27A31BC087DC	12	TCGA	2016	NO	Not Available	Hypopharynx	TCGA-UF-A7JV	12D94C6E-323F-450B-B510-F2AB4671E0FA	2	-22985	90	0		Not Available																								Not Evaluated	Not Evaluated
TCGA-UP-A6WW-01A-12R-A34R-07	Tumor	TCGA-UP-A6WW	355.48.0	Nationwide Children's Hospital	22	HNSC	003FEDEA-057B-43C0-95F5-3BBB530A8961	12	TCGA	2016	YES	3	Oral Tongue	TCGA-UP-A6WW	F88EC55C-4C1E-4593-9C89-1981F220C0F8	28	-21427		0	457	Not Available																								Not Available	HISPANIC OR LATINO
TCGA-WA-A7GZ-01A-11R-A34R-07	Tumor	TCGA-WA-A7GZ	355.48.0	Nationwide Children's Hospital	22	HNSC	8D13BD6A-40DC-4380-BC34-1A41B8700BEA	12	TCGA	2016	Not Available	Not Available	Floor of mouth	TCGA-WA-A7GZ	F9E82D62-FAFC-45B0-97CF-D1A4A3C884A1	14	-21207		0	335	Not Available																								Not Available	NOT HISPANIC OR LATINO
TCGA-WA-A7GZ-11A-11R-A34R-07	Normal	TCGA-WA-A7GZ	355.48.0	Nationwide Children's Hospital	22	HNSC	8D13BD6A-40DC-4380-BC34-1A41B8700BEA	12	TCGA	2016	Not Available	Not Available	Floor of mouth	TCGA-WA-A7GZ	F9E82D62-FAFC-45B0-97CF-D1A4A3C884A1	14	-21207		0	335	Not Available																								Not Available	NOT HISPANIC OR LATINO
TCGA-WA-A7H4-01A-21R-A34R-07	Tumor	TCGA-WA-A7H4	355.48.0	Nationwide Children's Hospital	22	HNSC	488FC758-59F3-4698-98A8-54CC7A662277	12	TCGA	2016	Not Available	Not Available	Oral Tongue	TCGA-WA-A7H4	4199C571-F20F-4873-AFD3-5393F2F8D2DB	14	-25363		0	153	Not Available																								Not Available	NOT HISPANIC OR LATINO
		TCGA-CN-A6V1	355.48.0	Nationwide Children's Hospital	22	HNSC	C73862D6-8EBE-417B-B348-9705469B15BD	12	TCGA	2016	NO	Not Available	Tonsil	TCGA-CN-A6V1	03B57FEE-55C7-4873-B7EF-E29ABD98863A	2	-21730		0	223	Not Available	TCGA-CN-A6V1-D52253	DDE9CCD8-1220-4675-8DBF-3FE6208E46D4	Not Available	2	34	13	erbitux	Complete Response	12	Not Available	Not Available	Not Available	Not Available	Not Applicable	Not Available	Not Available	NO	Immunotherapy	Not Available	Not Available	Not Available	YES	2013	Not Available	Not Available
		TCGA-BB-7871	215.70.0	Nationwide Children's Hospital	22	HNSC	E6237E2B-3529-49F5-9082-891C180742D5	12	TCGA	2016	YES	0	Base of tongue	TCGA-BB-7871	9dd8b7cc-d094-474b-9573-cbff4ab233c8	12	-23409		0	428	Not Available																								Not Available	NOT HISPANIC OR LATINO
		TCGA-IQ-A61K	311.57.0	Nationwide Children's Hospital	22	HNSC	71F466AB-C399-4507-945A-E7E966CA4D5A	12	TCGA	2016	NO	Not Available	Oral Tongue	TCGA-IQ-A61K	2C96D3C4-323E-4A2A-9132-40E860B701A5	29	-25697	161	0		Not Available	TCGA-IQ-A61K-D46027	F14AA026-A12F-4F54-860C-4357B6BCE71E	Not Available	29	108	108	cisplatin	Unknown	7	Not Available	Not Available	Not Available	Not Available	Not Applicable	Not Available	Not Available	NO	Chemotherapy	Not Available	Not Available	Not Available	NO	2013	Not Evaluated	NOT HISPANIC OR LATINO
		TCGA-BB-7862	215.70.0	Nationwide Children's Hospital	22	HNSC	7706140B-A65D-4D74-AF36-145A81B5CE60	12	TCGA	2016	YES	Not Available	Larynx	TCGA-BB-7862	f68237e7-7fc0-4b6b-8095-b49515ddd169	15	-24823		0	536	Not Available																								Not Available	NOT HISPANIC OR LATINO
		TCGA-BB-7863	215.70.0	Nationwide Children's Hospital	22	HNSC	FF6EBB1A-4E8B-42F1-9E1E-717D253DEE18	12	TCGA	2016	YES	0	Oral Tongue	TCGA-BB-7863	31202ace-6480-46db-8e0d-b4c64149e326	2	-15899		0	423	Not Available																								Not Available	HISPANIC OR LATINO
		TCGA-CQ-7064	241.67.0	Nationwide Children's Hospital	22	HNSC	A7F00545-E629-433B-B8C8-5EE6838661AE	12	TCGA	2016	YES	0	Buccal Mucosa	TCGA-CQ-7064	f383df81-a334-43c6-a5be-ea00013a4f6a	21	-30640		0	1378	Not Available																								Not Evaluated	NOT HISPANIC OR LATINO
		TCGA-CN-A63Y	311.57.0	Nationwide Children's Hospital	22	HNSC	A48F14B3-5A3F-4B99-AC3A-B888712661B3	12	TCGA	2016	NO	Not Available	Tonsil	TCGA-CN-A63Y	60FCC18C-0509-4C7B-ACA9-178F47055077	17	-17125		0	175	Not Available																								Not Evaluated	NOT HISPANIC OR LATINO
		TCGA-CQ-7067	215.70.0	Nationwide Children's Hospital	22	HNSC	526B5EB8-5AEA-44C0-A6B5-70871C412B7F	12	TCGA	2016	NO	Not Available	Oral Tongue	TCGA-CQ-7067	e0f4d67d-5ca3-4c21-9f52-04f660827d08	14	-27707		0	509	Not Available																								Not Available	NOT HISPANIC OR LATINO	Not Available	Not Available	Not Available
		TCGA-BA-5149	83.86.0	Nationwide Children's Hospital	22	HNSC	015D3635-5F6B-499E-B5CB-E05A6A7DE5C1	12	TCGA	2016	YES	7	Floor of mouth	TCGA-BA-5149	cb99fb14-641c-4fb3-bf1d-17efb8cd982a	4	-17177		0	248	Not Available	TCGA-BA-5149-D9975	be1ea051-1617-4794-9baf-b7d7817e78a4	Not Available	4	80	59	Cisplatin	Not Available	4	2	100	mg/m2	ADJUVANT	Not Applicable	1	Not Available	NO	Chemotherapy	Not Available	Not Available	Not Available	Not Available	2011	Not Available	NOT HISPANIC OR LATINO	Not Available;YES	Not Available;NO	Not Available;Not Available
		TCGA-DQ-7589	215.70.0	Nationwide Children's Hospital	22	HNSC	C699991E-52A0-47FE-9488-524D7CF9B183	12	TCGA	2016	YES	10	Larynx	TCGA-DQ-7589	4648225e-5b68-488a-969a-e8d812190c6f	16	-25606		0	575	Not Available	TCGA-DQ-7589-D33012;TCGA-DQ-7589-D33013;TCGA-DQ-7589-D33014;TCGA-DQ-7589-D33015;TCGA-DQ-7589-D33016	a4180d87-8158-4da3-8ee9-c3e8e2e373ef;0d61b8e3-b176-42f3-b99b-fff69007fd9a;6e256d49-b28d-4a32-9d14-20a9f02755a2;35bec474-aed7-466b-a515-ff6126d3c5be;3d9261b2-d77c-4e21-9243-13ba42d7747f	Not Available;Not Available;Not Available;Not Available;Not Available	25;25;25;25;25	34;34;34;154;154	9;9;9;119;119	carboplatin;docetaxel;5-fluorouracil;carboplatin;paclitaxel	Stable Disease;Stable Disease;Stable Disease;Complete Response;Complete Response	7;7;7;7;7	Not Available;Not Available;Not Available;Not Available;Not Available	Not Available;Not Available;Not Available;Not Available;Not Available	Not Available;Not Available;Not Available;Not Available;Not Available	Not Available;Not Available;Not Available;Not Available;Not Available	Not Applicable;Not Applicable;Not Applicable;Not Applicable;Not Applicable	Not Available;Not Available;Not Available;Not Available;Not Available	Not Available;Not Available;Not Available;Not Available;Not Available	NO;NO;NO;NO;NO	Chemotherapy;Chemotherapy;Chemotherapy;Chemotherapy;Chemotherapy	Not Available;Not Available;Not Available;Not Available;Not Available	Not Available;Not Available;Not Available;Not Available;Not Available	Not Available;Not Available;Not Available;Not Available;Not Available	NO;NO;NO;NO;NO	2012;2012;2012;2012;2012	Not Available	NOT HISPANIC OR LATINO	Not Available	Not Available	Not Available
		TCGA-BB-7870	215.70.0	Nationwide Children's Hospital	22	HNSC	698B6F0E-E92A-41DC-A787-1208F610F90C	12	TCGA	2016	YES	6	Larynx	TCGA-BB-7870	d83b6b2d-932b-4240-b99d-5506f18af892	25	-21443		0	1153	Not Available																								Not Available	NOT HISPANIC OR LATINO
		TCGA-MT-A67G	311.57.0	Nationwide Children's Hospital	22	HNSC	F2DB797C-88CC-413D-BE90-B0681E2D50DC	12	TCGA	2016	YES	2	Tonsil	TCGA-MT-A67G	7BFEF2DD-5F82-4521-9369-0329E41FAF1B	21	-19394		0	189	Not Available	TCGA-MT-A67G-D43419	6FB3B336-3A3D-4D3C-A0C4-F193A670CAAF	Not Available	21	112	72	cisplatin	Unknown	5	Not Available	Not Available	Not Available	Not Available	Not Applicable	Not Available	Not Available	NO	Chemotherapy	Not Available	Not Available	Not Available	NO	2013	Not Evaluated	NOT HISPANIC OR LATINO
		TCGA-DQ-7595	215.70.0	Nationwide Children's Hospital	22	HNSC	AABCE367-8A52-413D-9059-B6D8F3E4948C	12	TCGA	2016	YES	10	Larynx	TCGA-DQ-7595	f6ebe511-a4df-4310-bd59-3a46d43f100b	29	-19530		0	324	Not Available	TCGA-DQ-7595-D33046	fca19bda-16e6-464d-892e-478bcd016b6d	Not Available	25	62	34	cisplatin	Complete Response	7	Not Available	Not Available	Not Available	Not Available	Not Applicable	Not Available	Not Available	NO	Chemotherapy	Not Available	Not Available	Not Available	NO	2012	Not Available	NOT HISPANIC OR LATINO	Not Available	Not Available	Not Available
		TCGA-IQ-A61L	311.57.0	Nationwide Children's Hospital	22	HNSC	EF6D3173-D5CF-42EC-ABAF-4632CC7710DF	12	TCGA	2016	NO	Not Available	Oral Tongue	TCGA-IQ-A61L	818AD88A-131E-49DF-85D8-55BBA0E9EC02	29	-26506		0	351	Not Available	TCGA-IQ-A61L-D46037;TCGA-IQ-A61L-D46038	CB9E8E78-5F55-47E8-AFE7-6DBFBBDF2F6D;3F0E83AD-CCC8-4D38-A2EC-9F7434E4ABFE	Not Available;Not Available	29;29	Not Available;Not Available	262;262	Cisplatin;Cetuximab	Not Applicable;Not Applicable	7;7	Not Available;Not Available	Not Available;Not Available	Not Available;Not Available	Not Available;Not Available	Not Applicable;Not Applicable	Not Available;Not Available	Not Available;Not Available	YES;YES	Chemotherapy;Chemotherapy	Not Available;Not Available	Not Available;Not Available	Not Available;Not Available	NO;NO	2013;2013	Not Evaluated	HISPANIC OR LATINO
		TCGA-BB-7866	215.70.0	Nationwide Children's Hospital	22	HNSC	2FC3DC65-B007-4522-BF2F-23B27492F95B	12	TCGA	2016	NO	Not Available	Tonsil	TCGA-BB-7866	16d52afb-a954-4cb3-b168-c1501208f691	2	-14810		0	638	Not Available	TCGA-BB-7866-D65427	1D7CB457-F6EF-47BB-BF72-32DCF869F276	Not Available	23	116	71	cisplatin	Complete Response	9	Not Available	Not Available	Not Available	Not Available	Not Applicable	Not Available	Not Available	NO	Chemotherapy	Not Available	Not Available	Not Available	NO	2014	Not Available	NOT HISPANIC OR LATINO
		TCGA-BB-7864	215.70.0	Nationwide Children's Hospital	22	HNSC	31E8770E-B0AB-410A-B48D-A269674B8C5E	12	TCGA	2016	YES	6	Larynx	TCGA-BB-7864	f87f7cee-e9bd-45cc-a740-3d8ffa9746d3	26	-22317		0	687	Not Available	TCGA-BB-7864-D65448	6B71BB1A-DA2D-4125-94C8-52E7AB2D1407	Not Available	23	179	136	Cisplatin	Complete Response	9	Not Available	Not Available	Not Available	Not Available	Not Applicable	Not Available	Not Available	NO	Chemotherapy	Not Available	Not Available	Not Available	NO	2014	Not Available	NOT HISPANIC OR LATINO
		TCGA-CN-A640	311.57.0	Nationwide Children's Hospital	22	HNSC	E3CE1066-290F-40E1-9630-422A5535356E	12	TCGA	2016	YES	0	Oral Tongue	TCGA-CN-A640	ED46CC12-2EDD-4C95-9814-54B5B6682FCD	17	-14758	134	0		Not Available																								Not Evaluated	NOT HISPANIC OR LATINO
		TCGA-BB-7861	215.70.0	Nationwide Children's Hospital	22	HNSC	AC486B26-DDA5-4C0B-94C0-594798C4DC3C	12	TCGA	2016	NO	Not Available	Base of tongue	TCGA-BB-7861	1ae087ac-63f0-4cf9-b698-f5c13e1f4681	21	-20563		0	310	Not Available	TCGA-BB-7861-D65452	CEE45CF8-4DDF-485C-AEDC-63DADD067CFA	Not Available	23	71	43	Not Available	Complete Response	9	Not Available	Not Available	Not Available	Not Available	Not Applicable	Not Available	Not Available	NO	Chemotherapy	Not Available	Not Available	Not Available	NO	2014	Not Available	NOT HISPANIC OR LATINO
		TCGA-DQ-7593	215.70.0	Nationwide Children's Hospital	22	HNSC	5E81AE21-9BF9-42B4-9FCD-E54CA8E3AB28	12	TCGA	2016	YES	8	Base of tongue	TCGA-DQ-7593	67eae8b3-3bd2-4e87-af78-ffe8221f318d	29	-21439		0	369	Not Available	TCGA-DQ-7593-D33035;TCGA-DQ-7593-D33036	ba7fced5-d534-490e-8041-ddd95e8df92b;15a3c061-b666-4dbf-916a-fcbf82997a5b	Not Available;Not Available	25;25	67;67	25;25	carboplatin;taxol	Complete Response;Complete Response	7;7	Not Available;Not Available	Not Available;Not Available	Not Available;Not Available	Not Available;Not Available	Not Applicable;Not Applicable	Not Available;Not Available	Not Available;Not Available	NO;NO	Chemotherapy;Chemotherapy	Not Available;Not Available	Not Available;Not Available	Not Available;Not Available	NO;NO	2012;2012	Not Available	Not Available	Not Available	Not Available	Not Available
		TCGA-CV-7243	164.84.0	Nationwide Children's Hospital	22	HNSC	2E6C753D-6EDB-4D7D-BA1D-FAA9B8193D2F	12	TCGA	2016	YES	1	Oral Tongue	TCGA-CV-7243	fb7672f9-5dab-4204-a137-c5fb84903892	5	-18466		0	954	Not Available																								Not Available	NOT HISPANIC OR LATINO
		TCGA-BB-7872	215.70.0	Nationwide Children's Hospital	22	HNSC	0D33B858-6B56-4D8C-9A1A-DC2BBD3F2F37	12	TCGA	2016	YES	Not Available	Oral Tongue	TCGA-BB-7872	80593c77-4530-413b-bb05-adca5d43bb82	3	-23185		0	436	Not Available	TCGA-BB-7872-D65437	297C2D7D-9543-4B23-B6E7-374CB2C7CC64	Not Available	23	154	112	Cisplatin	Complete Response	9	Not Available	Not Available	Not Available	Not Available	Not Applicable	Not Available	Not Available	NO	Chemotherapy	Not Available	Not Available	Not Available	NO	2014	Not Available	NOT HISPANIC OR LATINO
		TCGA-DQ-7590	215.70.0	Nationwide Children's Hospital	22	HNSC	4C6133C6-F6B3-4EC7-8AE2-A0EF1CC688F1	12	TCGA	2016	YES	5	Tonsil	TCGA-DQ-7590	a8a391ba-e595-4a91-bd55-02b312e55427	29	-18718		0	661	Not Available	TCGA-DQ-7590-D33020;TCGA-DQ-7590-D33021	5acafa10-e370-4aca-8f29-bcfb2eb86e4a;c2cd31df-7cdc-4229-b365-dadb03887c0d	Not Available;Not Available	25;25	87;87	45;45	carboplatin;taxol	Complete Response;Complete Response	7;7	Not Available;Not Available	Not Available;Not Available	Not Available;Not Available	Not Available;Not Available	Not Applicable;Not Applicable	Not Available;Not Available	Not Available;Not Available	NO;NO	Chemotherapy;Chemotherapy	Not Available;Not Available	Not Available;Not Available	Not Available;Not Available	NO;NO	2012;2012	Not Available	NOT HISPANIC OR LATINO	Not Available	Not Available	Not Available
		TCGA-HD-7917	215.70.0	Nationwide Children's Hospital	22	HNSC	BD64A346-40B9-4392-8E87-C173F98873EC	12	TCGA	2016	YES	12	Floor of mouth	TCGA-HD-7917	a40f1055-3dc4-4d01-930c-92cf314f73f8	10	-22979		0	37	Not Available																								Not Available	NOT HISPANIC OR LATINO
		TCGA-BA-A6DF	311.57.0	Nationwide Children's Hospital	22	HNSC	B4B82E70-92E1-4FE0-93E9-5FFA4EA3B22E	12	TCGA	2016	YES	0	Floor of mouth	TCGA-BA-A6DF	B41FAB9F-AF83-4EA2-89FB-A5999B168412	17	-29283	238	0		Not Available																								Not Evaluated	NOT HISPANIC OR LATINO
		TCGA-DQ-7594	215.70.0	Nationwide Children's Hospital	22	HNSC	EAFBFF22-E6F5-47C4-AFA0-0D010BF0262D	12	TCGA	2016	YES	1	Base of tongue	TCGA-DQ-7594	62ca707c-0657-4b7c-863c-99f4ec475972	29	-17471		0	368	Not Available	TCGA-DQ-7594-D33041;TCGA-DQ-7594-D33042	30e4d1cd-f366-44fc-8a63-d3e0375fa382;77f5ce85-f72e-4ba3-9d07-3fc43549d753	Not Available;Not Available	25;25	53;53	12;12	taxol;carboplatin	Complete Response;Complete Response	7;7	Not Available;Not Available	Not Available;Not Available	Not Available;Not Available	Not Available;Not Available	Not Applicable;Not Applicable	Not Available;Not Available	Not Available;Not Available	NO;NO	Chemotherapy;Chemotherapy	Not Available;Not Available	Not Available;Not Available	Not Available;Not Available	NO;NO	2012;2012	Not Available	NOT HISPANIC OR LATINO	Not Available	Not Available	Not Available
		TCGA-DQ-7596	215.70.0	Nationwide Children's Hospital	22	HNSC	33A74ECE-2A9E-43D3-BF01-418242EE27BA	12	TCGA	2016	YES	3	Tonsil	TCGA-DQ-7596	0f25d7fd-fc7c-4563-a8bd-80b5e0c32ea2	29	-17846		0	340	Not Available	TCGA-DQ-7596-D33026;TCGA-DQ-7596-D33028;TCGA-DQ-7596-D33029	A2B77C67-79C9-4899-89F0-63316D7139FE;C7272631-BBBE-4109-BBF2-2A1F12F340AD;927CC806-EB90-47AC-A80F-A6631E1FC388	Not Available;Not Available;Not Available	25;25;25	60;266;266	13;203;203	erbitux;alimta;carboplatin	Partial Response;Complete Response;Complete Response	7;7;7	Not Available;Not Available;Not Available	Not Available;Not Available;Not Available	Not Available;Not Available;Not Available	Not Available;Not Available;Not Available	Not Applicable;Not Applicable;Not Applicable	Not Available;Not Available;Not Available	Not Available;Not Available;Not Available	NO;NO;NO	Chemotherapy;Chemotherapy;Chemotherapy	Not Available;Not Available;Not Available	Not Available;Not Available;Not Available	Not Available;Not Available;Not Available	NO;NO;NO	2012;2012;2012	Not Available	NOT HISPANIC OR LATINO	YES	NO	YES
		TCGA-CV-7409	215.70.0	Nationwide Children's Hospital	22	HNSC	C9B32C13-45FE-43DA-BAE3-3FF48BED7492	12	TCGA	2016	NO	Not Available	Oral Cavity	TCGA-CV-7409	acd98e20-d2da-4256-99a5-13e261bc88e6	14	-15888	543	0		Not Available																								Not Available	NOT HISPANIC OR LATINO
[truncated: 148 more columns]
