# Supplementary material for: Increased response to TPF chemotherapy promotes immune escape in hypopharyngeal squamous cell carcinoma
Source: Front Pharmacol. 2023 Jan 13;13:1097197. doi: 10.3389/fphar.2022.1097197 (PMC9880322; doi:10.3389/fphar.2022.1097197)
Supplement: Supplementary file 10 [file DataSheet1.XLSX]

## Sheet: table
Correlated Gene	Cytoband	Spearman's Correlation		p-Value	q-Value
MRPS17	7p11.2	0.738724	0.738724	3.80672e-91	7.63057e-87
CHCHD2	7p11.2	0.734058	0.734058	1.89842e-89	1.90269e-85
ATP5F1E	20q13.32	0.662966	0.662966	2.21769e-67	1.48179e-63
TOMM7	7p15.3	0.661644	0.661644	5.00047e-67	2.50586e-63
NEDD8	14q12	0.652753	0.652753	1.06671e-64	4.27645e-61
ATP5MJ	14q32.33	0.652091	0.652091	1.57797e-64	5.27173e-61
MALSU1	7p15.3	0.641349	0.641349	7.98944e-62	2.28783e-58
NME2P1	12q24.23	0.634165	0.634165	4.48079e-60	1.12272e-56
PPIA	7p13	0.632363	0.632363	1.21028e-59	2.69557e-56
IKZF3	17q12-q21.1	-0.630722	0.630722	2.97324e-59	5.95986e-56
ROMO1	20q11.22	0.618186	0.618186	2.40026e-56	4.37393e-53
NCOA2	8q13.3	-0.617988	0.617988	2.6603e-56	4.44381e-53
OST4	2p23.3	0.614058	0.614058	2.03626e-55	3.02512e-52
SLIRP	14q24.3	0.613986	0.613986	2.11283e-55	3.02512e-52
ATP5MK	10q24.33	0.608199	0.608199	4.01507e-54	5.36548e-51
BICRAL	6p21.1	-0.607194	0.607194	6.6523e-54	8.33408e-51
RPL38	17q25.1	0.606222	0.606222	1.0827e-53	1.27663e-50
PFDN4	20q13.2	0.603367	0.603367	4.48075e-53	4.98981e-50
SPATA13	13q12.12	-0.602749	0.602749	6.0819e-53	6.41641e-50
PSMA2	7p14.1	0.602595	0.602595	6.56151e-53	6.57627e-50
EPC1	10p11.22	-0.600777	0.600777	1.6055e-52	1.53248e-49
NFIC	19p13.3	-0.600445	0.600445	1.88947e-52	1.72157e-49
PFDN2	1q23.3	0.599853	0.599853	2.52466e-52	2.2003e-49
RAPGEF6	5q31.1	-0.599598	0.599598	2.85987e-52	2.38859e-49
TMEM208	16q22.1	0.599101	0.599101	3.64357e-52	2.92141e-49
MRPS24	7p13	0.598971	0.598971	3.88229e-52	2.99309e-49
ATP5F1EP2	13q12.2	0.598105	0.598105	5.91745e-52	4.39316e-49
KDM3B	5q31.2	-0.597529	0.597529	7.82626e-52	5.60277e-49
RBIS	8q21.2	0.594825	0.594825	2.88603e-51	1.96925e-48
BCOR	Xp11.4	-0.594781	0.594781	2.94724e-51	1.96925e-48
SF3B6	2p23.3	0.593795	0.593795	4.72955e-51	3.05819e-48
ELOC	8q21.11	0.591516	0.591516	1.40153e-50	8.7793e-48
ASXL2	2p23.3	-0.591117	0.591117	1.69376e-50	1.02883e-47
RPS21	20q13.33	0.589392	0.589392	3.82752e-50	2.25655e-47
NCOR1	17p12-p11.2	-0.588806	0.588806	5.04501e-50	2.88935e-47
SEM1	7q21.3	0.586702	0.586702	1.35235e-49	7.52997e-47
SP1	12q13.13	-0.586503	0.586503	1.48399e-49	8.03964e-47
ARID1A	1p36.11	-0.585174	0.585174	2.75456e-49	1.41821e-46
LSM5	7p14.3	0.585128	0.585128	2.81444e-49	1.41821e-46
MBNL3	Xq26.2	-0.585116	0.585116	2.83005e-49	1.41821e-46
COPS9	2q37.3	0.584985	0.584985	3.00682e-49	1.47004e-46
IL6ST	5q11.2	-0.584804	0.584804	3.26994e-49	1.56062e-46
BARD1	2q35	-0.58374	0.58374	5.35354e-49	2.49562e-46
PPIB	15q22.31	0.583086	0.583086	7.23998e-49	3.2983e-46
KMT2D	12q13.12	-0.58266	0.58266	8.80962e-49	3.92419e-46
MED12	Xq13.1	-0.580379	0.580379	2.50674e-48	1.09234e-45
MARCHF8	10q11.21-q11.22	-0.58025	0.58025	2.65927e-48	1.13415e-45
NR2C2	3p25.1	-0.579078	0.579078	4.53696e-48	1.89465e-45
ARID1B	6q25.3	-0.579028	0.579028	4.63975e-48	1.89804e-45
HIPK1	1p13.2	-0.578907	0.578907	4.90356e-48	1.96584e-45
PSMC1	14q32.11	0.578804	0.578804	5.13717e-48	2.01911e-45
RALGAPA2	20p11.23	-0.578526	0.578526	5.82993e-48	2.24732e-45
MCTS1	Xq24	0.578141	0.578141	6.94245e-48	2.62569e-45
MRPL32	7p14.1	0.57804	0.57804	7.26619e-48	2.69724e-45
YKT6	7p13	0.577755	0.577755	8.26853e-48	3.0135e-45
HERC1	15q22.31	-0.577252	0.577252	1.03796e-47	3.71533e-45
ANKRD36BP1	1q24.2	-0.577169	0.577169	1.07781e-47	3.7903e-45
ZNF619	3p22.1	-0.576495	0.576495	1.46105e-47	5.04944e-45
ZNF366	5q13.1	-0.575941	0.575941	1.87451e-47	6.36857e-45
MRPL52	14q11.2	0.575797	0.575797	1.99962e-47	6.6804e-45
MGA	15q15	-0.57418	0.57418	4.12933e-47	1.35693e-44
PRR34-AS1	22q13.31	0.573208	0.573208	6.37429e-47	2.06085e-44
WDR7	18q21.31	-0.573065	0.573065	6.7938e-47	2.16161e-44
UBL5	19p13.2	0.57233	0.57233	9.41796e-47	2.94973e-44
SYNJ1	21q22.11	-0.571513	0.571513	1.35333e-46	4.17347e-44
GPRIN3	4q22.1	-0.570471	0.570471	2.14635e-46	6.51872e-44
NUTF2	16q22.1	0.569845	0.569845	2.82815e-46	8.46124e-44
ATE1	10q26.13	-0.56916	0.56916	3.82313e-46	1.12698e-43
RPS27A	2p16.1	0.56787	0.56787	6.73288e-46	1.95595e-43
TSTD2	9q22.33	-0.567603	0.567603	7.5653e-46	2.16638e-43
PTRH2	17q23.1	0.567475	0.567475	8.00204e-46	2.25917e-43
PIK3CG	7q22.3	-0.567344	0.567344	8.47098e-46	2.35834e-43
ERCC6L2	9q22.32	-0.567262	0.567262	8.78178e-46	2.41138e-43
TRMT112	11q13.1	0.567091	0.567091	9.46003e-46	2.56252e-43
NDUFS5	1p34.3	0.566509	0.566509	1.21927e-45	3.25871e-43
ELK4	1q32.1	-0.56607	0.56607	1.47595e-45	3.89282e-43
GNA11	19p13.3	-0.564195	0.564195	3.32803e-45	8.66367e-43
COX16	14q24.2	0.562886	0.562886	5.85141e-45	1.50374e-42
RPRD2	1q21.2	-0.562636	0.562636	6.51453e-45	1.65296e-42
TOMM6	6p21.1	0.562542	0.562542	6.78526e-45	1.70013e-42
RPL39	Xq24	0.562433	0.562433	7.11083e-45	1.75971e-42
COMMD6	13q22.2	0.562031	0.562031	8.44859e-45	2.06527e-42
NFATC2	20q13.2	-0.560554	0.560554	1.58934e-44	3.83835e-42
ASH1L	1q22	-0.560097	0.560097	1.93138e-44	4.60887e-42
UHMK1	1q23.3	-0.559987	0.559987	2.02414e-44	4.7734e-42
EP300	22q13.2	-0.559421	0.559421	2.57574e-44	6.00357e-42
ANKRD44	2q33.1	-0.559064	0.559064	2.99674e-44	6.90456e-42
ZNF689	16p11.2	-0.55873	0.55873	3.45437e-44	7.86851e-42
LNPEP	5q15	-0.558442	0.558442	3.90178e-44	8.78778e-42
ZKSCAN8	6p21	-0.557757	0.557757	5.21463e-44	1.15803e-41
RPL36AL	14q21.3	0.557738	0.557738	5.25721e-44	1.15803e-41
ZNF827	4q31.21-q31.22	-0.55709	0.55709	6.91021e-44	1.5056e-41
CREBRF	5q35.1	-0.557046	0.557046	7.03952e-44	1.51728e-41
PFDN6	6p21.32	0.556976	0.556976	7.2505e-44	1.54613e-41
MRTFB	16p13.12	-0.556771	0.556771	7.90492e-44	1.66794e-41
KLHL11	17q21.2	-0.556205	0.556205	1.0033e-43	2.09491e-41
RNF181	2p11.2	0.556078	0.556078	1.05853e-43	2.18744e-41
TMSB10	2p11.2	0.555104	0.555104	1.59267e-43	3.25766e-41
COA8	14q32.33	0.554682	0.554682	1.90101e-43	3.84906e-41
PSMA7	20q13.33	0.554517	0.554517	2.03643e-43	4.08202e-41
EPC2	2q23.1	-0.554156	0.554156	2.36813e-43	4.69991e-41
PSMG3	7p22.3	0.553035	0.553035	3.77849e-43	7.42547e-41
UQCRB	8q22.1	0.552784	0.552784	4.19497e-43	8.1639e-41
KAT6A	8p11.21	-0.552233	0.552233	5.27408e-43	1.01653e-40
RPF2	6q21	0.551956	0.551956	5.91612e-43	1.12942e-40
RPL27	17q21.31	0.55173	0.55173	6.49679e-43	1.22857e-40
UTRN	6q24.2	-0.551396	0.551396	7.46052e-43	1.39763e-40
NDUFAF2	5q12.1	0.550612	0.550612	1.03129e-42	1.91408e-40
METTL5	2q31.1	0.55049	0.55049	1.08468e-42	1.99472e-40
UQCC2	6p21.31	0.549608	0.549608	1.55971e-42	2.84221e-40
APC	5q22.2	-0.548763	0.548763	2.20704e-42	3.9856e-40
MARF1	16p13.11	-0.548509	0.548509	2.44876e-42	4.38262e-40
NME2	17q21.33	0.548474	0.548474	2.48414e-42	4.40661e-40
SPEN	1p36.21-p36.13	-0.547864	0.547864	3.18939e-42	5.60801e-40
MPLKIP	7p14.1	0.547683	0.547683	3.43402e-42	5.98564e-40
DGUOK	2p13.1	0.547261	0.547261	4.07953e-42	7.04949e-40
MRPL27	17q21.33	0.547084	0.547084	4.38513e-42	7.51281e-40
NAA10	Xq28	0.546985	0.546985	4.56475e-42	7.75427e-40
RAD54L2	3p21.2	-0.546887	0.546887	4.75215e-42	8.00478e-40
ARID5B	10q21.2	-0.546294	0.546294	6.0492e-42	1.01047e-39
REST	4q12	-0.545319	0.545319	8.98818e-42	1.47752e-39
MED13L	12q24.21	-0.545301	0.545301	9.05296e-42	1.47752e-39
GADD45GIP1	19p13.13	0.545288	0.545288	9.09921e-42	1.47752e-39
RP9P	7p14.3	0.545277	0.545277	9.14006e-42	1.47752e-39
COX6C	8q22.2	0.544904	0.544904	1.06323e-41	1.70499e-39
TSR3	16p13.3	0.544619	0.544619	1.19314e-41	1.89814e-39
SFT2D1	6q27	0.543984	0.543984	1.54231e-41	2.4343e-39
ZNF41	Xp11.3	-0.543771	0.543771	1.68089e-41	2.6323e-39
IKZF4	12q13.2	-0.543631	0.543631	1.7784e-41	2.76341e-39
SYNRG	17q12	-0.543307	0.543307	2.02567e-41	3.12343e-39
LLPH	12q14.3	0.542528	0.542528	2.77158e-41	4.24094e-39
C9ORF129	9q22.31	-0.542315	0.542315	3.01923e-41	4.58489e-39
GET4	7p22.3	0.541704	0.541704	3.85751e-41	5.81383e-39
CEP350	1q25.2	-0.541561	0.541561	4.08401e-41	6.10925e-39
RPL37	5p13.1	0.540499	0.540499	6.24398e-41	9.27115e-39
SNRPE	1q32.1	0.540457	0.540457	6.34778e-41	9.35598e-39
POLR2F	22q13.1	0.540407	0.540407	6.47592e-41	9.47517e-39
RBX1	22q13.2	0.540364	0.540364	6.58865e-41	9.57025e-39
SON	21q22.11	-0.540316	0.540316	6.71437e-41	9.6827e-39
RPL11	1p36.11	0.540129	0.540129	7.23373e-41	1.03572e-38
SOS1	2p22.1	-0.540106	0.540106	7.30271e-41	1.03818e-38
NME1	17q21.33	0.540068	0.540068	7.41264e-41	1.04638e-38
KIAA0754	1p34.2	-0.539551	0.539551	9.10599e-41	1.27264e-38
RPS10	6p21.31	0.539541	0.539541	9.14241e-41	1.27264e-38
TMA7	3p21.31	0.53946	0.53946	9.44189e-41	1.30526e-38
DDX56	7p13	0.539442	0.539442	9.50893e-41	1.30552e-38
ATXN7	3p14.1	-0.5388	0.5388	1.22686e-40	1.67296e-38
CCR4	3p22.3	-0.538335	0.538335	1.47564e-40	1.9986e-38
ARID2	12q12	-0.538139	0.538139	1.59415e-40	2.14461e-38
CCNT1	12q13.11-q13.12	-0.537753	0.537753	1.85717e-40	2.4818e-38
COMMD1	2p15	0.537587	0.537587	1.98355e-40	2.63313e-38
PIKFYVE	2q34	-0.537488	0.537488	2.06206e-40	2.71935e-38
ETV3	1q23.1	-0.537276	0.537276	2.24266e-40	2.93818e-38
ENY2	8q23.1	0.537255	0.537255	2.26088e-40	2.94281e-38
DMXL1	5q23.1	-0.537063	0.537063	2.43893e-40	3.15409e-38
NDUFA4	7p21.3	0.536774	0.536774	2.7334e-40	3.51224e-38
ZBTB8OS	1p35.1	0.536658	0.536658	2.86099e-40	3.65277e-38
NACA2	17q23.2	0.536544	0.536544	2.9925e-40	3.79372e-38
ATP5MF	7q22.1	0.53653	0.53653	3.00924e-40	3.79372e-38
PCGF1	2p13.1	0.536406	0.536406	3.15943e-40	3.95818e-38
RPL23	17q12	0.536315	0.536315	3.27495e-40	4.07742e-38
PSMD9	12q24.31	0.536009	0.536009	3.69335e-40	4.56995e-38
DAD1	14q11.2	0.535958	0.535958	3.76716e-40	4.63269e-38
CREBBP	16p13.3	-0.535455	0.535455	4.58992e-40	5.61006e-38
ZDHHC20	13q12.11	-0.535409	0.535409	4.67421e-40	5.67845e-38
BIRC6	2p22.3	-0.535287	0.535287	4.90304e-40	5.92057e-38
SEC61B	9q22.33	0.535099	0.535099	5.27694e-40	6.33391e-38
MRPL20	1p36.33	0.534575	0.534575	6.47773e-40	7.72894e-38
C7ORF50	7p22.3	0.534136	0.534136	7.69186e-40	9.11183e-38
RPS20	8q12.1	0.534124	0.534124	7.72767e-40	9.11183e-38
DPY30	2p22.3	0.533463	0.533463	1.00007e-39	1.1723e-37
RPS29	14q21.3	0.533375	0.533375	1.03504e-39	1.20054e-37
GPATCH8	17q21.31	-0.533372	0.533372	1.03613e-39	1.20054e-37
IFT43	14q24.3	0.533311	0.533311	1.06115e-39	1.22245e-37
ZNF81	Xp11.23	-0.532484	0.532484	1.46368e-39	1.67654e-37
TMEM258	11q12.2	0.532099	0.532099	1.69931e-39	1.93537e-37
ELOB	16p13.3	0.532014	0.532014	1.75628e-39	1.98896e-37
ZNF641	12q13.11	-0.531411	0.531411	2.21787e-39	2.48245e-37
DDI2	1p36.21	-0.531411	0.531411	2.2186e-39	2.48245e-37
MAN1A2	1p12	-0.531398	0.531398	2.22919e-39	2.48245e-37
ITPA	20p13	0.531208	0.531208	2.39957e-39	2.65743e-37
RTRAF	14q22.1	0.531071	0.531071	2.5296e-39	2.78604e-37
TIMM17A	1q32.1	0.530916	0.530916	2.68606e-39	2.94219e-37
SNRPF	12q23.1	0.530867	0.530867	2.73732e-39	2.98204e-37
ARPC3	12q24.11	0.530844	0.530844	2.7615e-39	2.99213e-37
LATS1	6q25.1	-0.530787	0.530787	2.82337e-39	3.04271e-37
EIF3I	1p35.2	0.530711	0.530711	2.90717e-39	3.11627e-37
POLE4	2p12	0.53004	0.53004	3.76609e-39	4.01549e-37
SMCR8	17p11.2	-0.529727	0.529727	4.24808e-39	4.50544e-37
MICOS10	1p36.13	0.529679	0.529679	4.32769e-39	4.56571e-37
MYL6	12q13.2	0.529348	0.529348	4.91563e-39	5.15884e-37
ZNF593	1p36.11	0.529141	0.529141	5.32238e-39	5.55662e-37
KMT2E	7q22.3	-0.528636	0.528636	6.45853e-39	6.70783e-37
BROX	1q41	-0.528167	0.528167	7.73087e-39	7.9879e-37
PLXNC1	12q22	-0.527854	0.527854	8.71234e-39	8.95584e-37
PHF2	9q22.31	-0.527302	0.527302	1.07587e-38	1.1003e-36
AP2S1	19q13.32	0.526975	0.526975	1.21881e-38	1.24015e-36
GVINP1	11p15.4	-0.52662	0.52662	1.39554e-38	1.41081e-36
HIVEP1	6p24.1	-0.52661	0.52661	1.4006e-38	1.41081e-36
TMEM256	17p13.1	0.52621	0.52621	1.63102e-38	1.63469e-36
RPS17	15q25.2	0.525616	0.525616	2.04362e-38	2.03803e-36
PDCD5	19q13.11	0.525404	0.525404	2.21537e-38	2.19837e-36
PPP1R14B	11q13.1	0.524943	0.524943	2.63766e-38	2.60453e-36
MANF	3p21.2	0.524694	0.524694	2.89851e-38	2.84807e-36
TGFBRAP1	2q12.1-q12.2	-0.524622	0.524622	2.97889e-38	2.91278e-36
ERBIN	5q12.3	-0.524316	0.524316	3.34447e-38	3.25437e-36
RPL6	12q24.13	0.523646	0.523646	4.3071e-38	4.17081e-36
RIF1	2q23.3	-0.523561	0.523561	4.44686e-38	4.28544e-36
GAS2L3	12q23.1	-0.523139	0.523139	5.21308e-38	4.99982e-36
ANAPC11	17q25.3	0.523124	0.523124	5.24173e-38	5.00336e-36
CCR8	3p22.1	-0.522987	0.522987	5.51972e-38	5.24373e-36
TAF1L	9p21.1	-0.522946	0.522946	5.60527e-38	5.29989e-36
NOPCHAP1	12q23.3	0.522847	0.522847	5.81816e-38	5.47535e-36
GEMIN7	19q13.32	0.522158	0.522158	7.53679e-38	7.05958e-36
GPR174	Xq21.1	-0.521447	0.521447	9.83835e-38	9.17255e-36
SNRPGP15	19p13.12	0.521218	0.521218	1.07194e-37	9.94773e-36
ATP5ME	4p16.3	0.521172	0.521172	1.09054e-37	1.00736e-35
MRPS15	1p34.3	0.521152	0.521152	1.09879e-37	1.01033e-35
SERINC5	5q14.1	-0.520796	0.520796	1.25508e-37	1.14877e-35
ZNF407	18q23	-0.520604	0.520604	1.34816e-37	1.22835e-35
DIABLO	12q24.31	0.520188	0.520188	1.57451e-37	1.4281e-35
TAOK1	17q11.2	-0.51979	0.51979	1.82644e-37	1.64914e-35
NHLRC2	10q25.3	-0.519767	0.519767	1.84205e-37	1.65578e-35
SLC25A39	17q21.31	0.519329	0.519329	2.16753e-37	1.93965e-35
EMSY	11q13.5	-0.518831	0.518831	2.60829e-37	2.32369e-35
TCAF1	7q35	-0.517699	0.517699	3.96596e-37	3.51759e-35
DENND4A	15q22.31	-0.517637	0.517637	4.05804e-37	3.58341e-35
S100A10	1q21.3	0.517389	0.517389	4.44775e-37	3.91031e-35
POMK	8p11.21	-0.517316	0.517316	4.56886e-37	3.99925e-35
RP9	7p14.3	0.517274	0.517274	4.64153e-37	4.04519e-35
GTF2A1	14q31.1	-0.517243	0.517243	4.69488e-37	4.07398e-35
RNF213	17q25.3	-0.517048	0.517048	5.04384e-37	4.34476e-35
POLD2	7p13	0.517045	0.517045	5.05028e-37	4.34476e-35
REV3L	6q21	-0.51695	0.51695	5.23068e-37	4.48073e-35
ZNF142	2q35	-0.516726	0.516726	5.67967e-37	4.84464e-35
VTI1B	14q24.1	0.516607	0.516607	5.93375e-37	5.03991e-35
ATP5PD	17q25.1	0.516468	0.516468	6.24625e-37	5.28295e-35
C19ORF53	19p13.13	0.515387	0.515387	9.2938e-37	7.82749e-35
FKBP3	14q21.2	0.514563	0.514563	1.257e-36	1.05425e-34
AUP1	2p13.1	0.513676	0.513676	1.73801e-36	1.4516e-34
NDUFAB1	16p12.2	0.512444	0.512444	2.72155e-36	2.26363e-34
ITGB1BP1	2p25.1	0.512331	0.512331	2.83537e-36	2.34855e-34
RPL30	8q22.2	0.512186	0.512186	2.98903e-36	2.46564e-34
USF3	3q13.2	-0.512077	0.512077	3.10887e-36	2.55399e-34
NOP10	15q14	0.511951	0.511951	3.25483e-36	2.66158e-34
PAM16	16p13.3	0.511941	0.511941	3.2664e-36	2.66158e-34
BOLA2	16p11.2	0.511084	0.511084	4.45585e-36	3.6161e-34
AFF1	4q21.3-q22.1	-0.510343	0.510343	5.82281e-36	4.70638e-34
SNX22	15q22.31	0.509957	0.509957	6.69098e-36	5.38637e-34
CHCHD1	10q22.2	0.509585	0.509585	7.65099e-36	6.13457e-34
AKNA	9q32	-0.509193	0.509193	8.80832e-36	7.03438e-34
NCOA1	2p23.3	-0.509172	0.509172	8.87481e-36	7.05935e-34
ZC3H4	19q13.32	-0.50914	0.50914	8.97928e-36	7.11421e-34
MRPL53	2p13.1	0.508806	0.508806	1.01224e-35	7.98834e-34
RPL26	17p13.1	0.508761	0.508761	1.02868e-35	8.08623e-34
TRAPPC2L	16q24.3	0.50871	0.50871	1.04782e-35	8.20453e-34
RPL31	2q11.2	0.508662	0.508662	1.06599e-35	8.31434e-34
REL	2p16.1	-0.508529	0.508529	1.11817e-35	8.68746e-34
XRN1	3q23	-0.508466	0.508466	1.14379e-35	8.85224e-34
RPS24	10q22.3	0.508446	0.508446	1.15195e-35	8.8811e-34
RPS6KA5	14q32.11	-0.50825	0.50825	1.23577e-35	9.49083e-34
GSTO1	10q25.1	0.508223	0.508223	1.24767e-35	9.54563e-34
SDF2	17q11.2	0.508112	0.508112	1.29817e-35	9.89422e-34
ZNF791	19p13.13	-0.507939	0.507939	1.38105e-35	1.0486e-33
TNFSF15	9q32	-0.507882	0.507882	1.40994e-35	1.0665e-33
SERF2	15q15.3	0.507596	0.507596	1.56135e-35	1.17659e-33
RPL26L1	5q35.1	0.507438	0.507438	1.65217e-35	1.24036e-33
PPIAL4C	1q21.2	0.507408	0.507408	1.67019e-35	1.24922e-33
ORMDL2	12q13.2	0.507289	0.507289	1.74285e-35	1.29872e-33
KMT2A	11q23.3	-0.507235	0.507235	1.77673e-35	1.31906e-33
PBRM1	3p21.1	-0.506805	0.506805	2.07113e-35	1.53195e-33
SHPRH	6q24.3	-0.506691	0.506691	2.15728e-35	1.5898e-33
SUGT1	13q14.3	0.506481	0.506481	2.32474e-35	1.70694e-33
HECTD4	12q24.13	-0.505776	0.505776	2.98699e-35	2.18519e-33
SARNP	12q13.2	0.505535	0.505535	3.2541e-35	2.37122e-33
POMP	13q12.3	0.505526	0.505526	3.26494e-35	2.37122e-33
CTDSP2	12q14.1	-0.505384	0.505384	3.433e-35	2.48428e-33
POLR2L	11p15.5	0.504617	0.504617	4.50612e-35	3.24911e-33
NDUFAF8	17q25.3	0.504397	0.504397	4.87027e-35	3.49909e-33
GTF2H5	6q25.3	0.504163	0.504163	5.29062e-35	3.78751e-33
RNF169	11q13.4	-0.504126	0.504126	5.36081e-35	3.82411e-33
MRPL51	12p13.31	0.504072	0.504072	5.46424e-35	3.88407e-33
TXNDC17	17p13.1	0.503979	0.503979	5.64671e-35	3.99959e-33
STX8	17p13.1	0.503947	0.503947	5.71017e-35	4.03029e-33
ZZEF1	17p13.2	-0.503858	0.503858	5.89339e-35	4.14502e-33
SYNE2	14q23.2	-0.503753	0.503753	6.11622e-35	4.2867e-33
N4BP2	4p14	-0.503709	0.503709	6.21146e-35	4.33828e-33
KMT2C	7q36.1	-0.50362	0.50362	6.40929e-35	4.46052e-33
ABCD2	12q12	-0.503611	0.503611	6.43099e-35	4.46052e-33
PTS	11q23.1	0.503218	0.503218	7.38577e-35	5.1051e-33
KCTD20	6p21.31	-0.503191	0.503191	7.45747e-35	5.13694e-33
ANKRD19P	9q22.31	0.50303	0.50303	7.8911e-35	5.41702e-33
EBNA1BP2	1p34.2	0.50298	0.50298	8.03113e-35	5.49434e-33
MED13	17q23.2	-0.502923	0.502923	8.19401e-35	5.5867e-33
B3GNT4	12q24.31	0.502765	0.502765	8.66234e-35	5.88599e-33
CFAP251	12q24.31	0.502592	0.502592	9.20539e-35	6.23385e-33
KRTCAP2	1q22	0.502544	0.502544	9.36181e-35	6.31843e-33
MRPL14	6p21.1	0.502465	0.502465	9.62818e-35	6.47641e-33
MRPL33	2p23.2	0.501552	0.501552	1.32606e-34	8.88995e-33
NPAT	11q22.3	-0.501435	0.501435	1.38168e-34	9.23194e-33
CYTOR	2p11.2	0.50111	0.50111	1.54813e-34	1.03097e-32
RNF125	18q12.1	-0.501036	0.501036	1.58903e-34	1.0547e-32
UQCR10	22q12.2	0.501016	0.501016	1.60012e-34	1.05856e-32
CYSLTR1	Xq21.1	-0.500935	0.500935	1.64602e-34	1.08535e-32
CCT6A	7p11.2	0.500865	0.500865	1.68685e-34	1.10862e-32
SIGLEC6	19q13.41	-0.500374	0.500374	2.00245e-34	1.31173e-32
BPTF	17q24.2	-0.500303	0.500303	2.05296e-34	1.34044e-32
CNPY2	12q13.3	0.500001	0.500001	2.2806e-34	1.48424e-32
HCFC1	Xq28	-0.49993	0.49993	2.33755e-34	1.51638e-32
SNRPD2	19q13.2-q13.3	0.499818	0.499818	2.43134e-34	1.57214e-32
LBHD1	11q12.3	0.499761	0.499761	2.48006e-34	1.59848e-32
MRPL55	1q42.13	0.499628	0.499628	2.59768e-34	1.66893e-32
RNF38	9p13.2	-0.499491	0.499491	2.72419e-34	1.74461e-32
CD84	1q23.3	-0.499264	0.499264	2.9481e-34	1.88199e-32
MRPS28	8q21.13	0.499177	0.499177	3.03863e-34	1.93363e-32
RERE	1p36.23	-0.499157	0.499157	3.06028e-34	1.94124e-32
PRKAR2A	3p21.31	-0.499057	0.499057	3.16751e-34	2.00293e-32
PDPK1	16p13.3	-0.498917	0.498917	3.32631e-34	2.09672e-32
HYPK	15q15.3	0.498777	0.498777	3.49138e-34	2.19388e-32
COPRS	17q11.2	0.498739	0.498739	3.53771e-34	2.21604e-32
P2RY10	Xq21.1	-0.498575	0.498575	3.74552e-34	2.33891e-32
GAR1	4q25	0.498533	0.498533	3.80014e-34	2.36565e-32
HIPK3	11p13	-0.49848	0.49848	3.87099e-34	2.40229e-32
PHIP	6q14.1	-0.498307	0.498307	4.10943e-34	2.54239e-32
ZBTB37	1q25.1	-0.498045	0.498045	4.50008e-34	2.77551e-32
PTAR1	9q21.12	-0.49802	0.49802	4.53917e-34	2.79103e-32
USP37	2q35	-0.49769	0.49769	5.08991e-34	3.1201e-32
RPL34	4q25	0.497463	0.497463	5.50407e-34	3.36369e-32
KAT6B	10q22.2	-0.497248	0.497248	5.92856e-34	3.6121e-32
RPLP2	11p15.5	0.497112	0.497112	6.2137e-34	3.77435e-32
ZNHIT1	7q22.1	0.496746	0.496746	7.05231e-34	4.2708e-32
CBX3	7p15.2	0.496731	0.496731	7.08728e-34	4.27905e-32
EIF2S2	20q11.22	0.496627	0.496627	7.34805e-34	4.42317e-32
IFI27L2	14q32.12	0.49654	0.49654	7.57062e-34	4.5435e-32
ARHGAP26	5q31.3	-0.496369	0.496369	8.0299e-34	4.80476e-32
CEP97	3q12.3	-0.49612	0.49612	8.74943e-34	5.21971e-32
MRPL28	16p13.3	0.495892	0.495892	9.46194e-34	5.62803e-32
PSMB5	14q11.2	0.495865	0.495865	9.55048e-34	5.66388e-32
GEMIN6	2p22.1	0.495849	0.495849	9.60243e-34	5.6779e-32
SNHG15	7p13	0.495829	0.495829	9.67065e-34	5.70142e-32
TIMM9	14q23.1	0.495503	0.495503	1.08153e-33	6.35754e-32
SNRPD3	22q11.23	0.495373	0.495373	1.13117e-33	6.62993e-32
MRPS5	2q11.1	0.495323	0.495323	1.1507e-33	6.72473e-32
SMIM26	20p11.23	0.49513	0.49513	1.22923e-33	7.16276e-32
SNRPG	2p13.3	0.494904	0.494904	1.32857e-33	7.71917e-32
ABCB1	7q21.12	-0.494775	0.494775	1.38854e-33	8.04428e-32
TBCA	5q14.1	0.494577	0.494577	1.486e-33	8.58411e-32
EIF3B	7p22.3	0.494527	0.494527	1.51146e-33	8.70608e-32
TNFSF8	9q32-q33.1	-0.494447	0.494447	1.55363e-33	8.92338e-32
FYCO1	3p21.31	-0.494293	0.494293	1.63746e-33	9.37796e-32
MED1	17q12	-0.49426	0.49426	1.65628e-33	9.45874e-32
PIN4P1	15q15.3	0.494179	0.494179	1.70256e-33	9.69541e-32
TRIM56	7q22.1	-0.493969	0.493969	1.82955e-33	1.0389e-31
BBX	3q13.12	-0.49392	0.49392	1.86067e-33	1.05359e-31
NPM3	10q24.32	0.493896	0.493896	1.8758e-33	1.05917e-31
ZNF106	15q15.1	-0.493782	0.493782	1.95e-33	1.09797e-31
STUB1	16p13.3	0.493655	0.493655	2.03647e-33	1.14345e-31
RWDD1	6q22.1	0.493612	0.493612	2.06714e-33	1.15742e-31
CFDP1	16q23.1	0.493165	0.493165	2.40691e-33	1.34391e-31
PPARGC1B	5q32	-0.492982	0.492982	2.56221e-33	1.42666e-31
SMCHD1	18p11.32	-0.49296	0.49296	2.58143e-33	1.43337e-31
ZBTB21	21q22.3	-0.492924	0.492924	2.61375e-33	1.44731e-31
GARS1	7p14.3	0.492659	0.492659	2.85994e-33	1.57927e-31
ITGA9	3p22.2	-0.492095	0.492095	3.46395e-33	1.90755e-31
EMG1	12p13.31	0.491996	0.491996	3.58251e-33	1.96744e-31
FAM13B	5q31.2	-0.491823	0.491823	3.80011e-33	2.08123e-31
TRRAP	7q22.1	-0.491709	0.491709	3.94926e-33	2.15703e-31
RPL36A	Xq22.1	0.491691	0.491691	3.97387e-33	2.16457e-31
AARSD1	17q21.31	0.491316	0.491316	4.51308e-33	2.45162e-31
AGO4	1p34.3	-0.49114	0.49114	4.78903e-33	2.59449e-31
PSMD4	1q21.3	0.4911	0.4911	4.85514e-33	2.62322e-31
PTPRC	1q31.3-q32.1	-0.49092	0.49092	5.15929e-33	2.78005e-31
ZNF644	1p22.2	-0.490709	0.490709	5.54221e-33	2.97567e-31
PARD3B	2q33.3	-0.490703	0.490703	5.552e-33	2.97567e-31
CNOT6L	4q21.1	-0.490666	0.490666	5.62278e-33	3.00556e-31
TMED9	5q35.3	0.490594	0.490594	5.76041e-33	3.07094e-31
ALDH6A1	14q24.3	-0.490506	0.490506	5.93529e-33	3.15578e-31
OCIAD2	4p11	0.490475	0.490475	5.99856e-33	3.18098e-31
CIAO2B	16q22.1	0.490162	0.490162	6.66575e-33	3.52546e-31
MRPS34	16p13.3	0.490127	0.490127	6.74498e-33	3.55798e-31
SPG11	15q21.1	-0.490039	0.490039	6.94765e-33	3.65527e-31
BEND3P3	10q22.3	-0.489781	0.489781	7.58001e-33	3.97752e-31
RC3H2	9q33.2	-0.489626	0.489626	7.9862e-33	4.17972e-31
GLRX2	1q31.2	0.489532	0.489532	8.24399e-33	4.3034e-31
EFCAB14	1p33	-0.489511	0.489511	8.30208e-33	4.32247e-31
RFX7	15q21.3	-0.489116	0.489116	9.48329e-33	4.92468e-31
RPL37A	2q35	0.489013	0.489013	9.81727e-33	5.08494e-31
HELZ	17q24.2	-0.488588	0.488588	1.13233e-32	5.8499e-31
PDF	16q22.1	0.488444	0.488444	1.18828e-32	6.12314e-31
PHF8	Xp11.22	-0.488367	0.488367	1.21953e-32	6.26808e-31
SFMBT2	10p14	-0.487781	0.487781	1.48438e-32	7.5868e-31
TSHZ1	18q22.3	-0.487776	0.487776	1.48648e-32	7.5868e-31
CHKB-DT	22q13.33	0.487774	0.487774	1.48746e-32	7.5868e-31
PHB	17q21.33	0.487759	0.487759	1.49512e-32	7.60649e-31
BUD31	7q22.1	0.487619	0.487619	1.56706e-32	7.95231e-31
ZNF678	1q42.13	-0.487501	0.487501	1.63014e-32	8.25157e-31
BCL2L11	2q13	-0.487477	0.487477	1.64307e-32	8.29606e-31
RNF138P1	5q11.2	-0.487409	0.487409	1.68086e-32	8.46556e-31
DOCK10	2q36.2	-0.486993	0.486993	1.93187e-32	9.70534e-31
MRPL13	8q24.12	0.486982	0.486982	1.93891e-32	9.71636e-31
CD226	18q22.2	-0.486915	0.486915	1.98254e-32	9.91021e-31
GIMAP6	7q36.1	-0.48661	0.48661	2.19534e-32	1.09466e-30
PUM1	1p35.2	-0.486479	0.486479	2.29332e-32	1.14069e-30
UQCRBP1	Xp11.21	0.486411	0.486411	2.34604e-32	1.16402e-30
NDUFB3	2q33.1	0.486335	0.486335	2.40617e-32	1.19091e-30
PFDN5	12q13.13	0.486309	0.486309	2.42696e-32	1.19824e-30
RPL23A	17q11.2	0.486284	0.486284	2.44696e-32	1.20515e-30
NAIP	5q13.2	-0.486074	0.486074	2.62413e-32	1.28923e-30
RPL36	19p13.3	0.485919	0.485919	2.76335e-32	1.35431e-30
RSBN1L	7q11.23	-0.485785	0.485785	2.88915e-32	1.41251e-30
NDUFB2	7q34	0.485579	0.485579	3.09447e-32	1.50921e-30
PPP1R35	7q22.1	0.48544	0.48544	3.24064e-32	1.57667e-30
TRAPPC1	17p13.1	0.4853	0.4853	3.39488e-32	1.64771e-30
DNAJC17	15q15.1	0.485272	0.485272	3.4267e-32	1.65914e-30
ARFGAP1	20q13.33	0.485038	0.485038	3.70302e-32	1.7886e-30
TBC1D5	3p24.3	-0.484935	0.484935	3.83274e-32	1.84681e-30
KBTBD4	11p11.2	-0.484808	0.484808	3.99669e-32	1.92119e-30
DCAF7	17q23.3	-0.484782	0.484782	4.0315e-32	1.93329e-30
RNF168	3q29	-0.484758	0.484758	4.06343e-32	1.94395e-30
ATP8B5P	9p13.3	0.48457	0.48457	4.32535e-32	2.06433e-30
MAST4	5q12.3	-0.484376	0.484376	4.61183e-32	2.19582e-30
MRPS23	17q22	0.484366	0.484366	4.62784e-32	2.19822e-30
EPG5	18q12.3-q21.1	-0.48427	0.48427	4.77636e-32	2.26341e-30
TBRG4	7p13	0.483973	0.483973	5.27049e-32	2.49167e-30
FICD	12q23.3	-0.483934	0.483934	5.33876e-32	2.51801e-30
MARCHF1	4q32.2-q32.3	-0.483878	0.483878	5.43775e-32	2.55868e-30
TAGAP	6q25.3	-0.483869	0.483869	5.4546e-32	2.5606e-30
SCAF8	6q25.2	-0.483852	0.483852	5.48465e-32	2.56869e-30
MED10	5p15.31	0.483707	0.483707	5.7552e-32	2.68911e-30
DYNLL1	12q24.31	0.483626	0.483626	5.90978e-32	2.74894e-30
TSHZ2	20q13.2	-0.483626	0.483626	5.91066e-32	2.74894e-30
PPIAL4G	1q21.2	0.483596	0.483596	5.97019e-32	2.7702e-30
DYRK1A	21q22.13	-0.483402	0.483402	6.36324e-32	2.94575e-30
SAMHD1	20q11.23	-0.48337	0.48337	6.43272e-32	2.97106e-30
RPS16	19q13.2	0.483333	0.483333	6.5111e-32	3.00034e-30
WDFY4	10q11.23	-0.483206	0.483206	6.79039e-32	3.12187e-30
DPP8	15q22.31	-0.483147	0.483147	6.92299e-32	3.17554e-30
NSD1	5q35.3	-0.482828	0.482828	7.69094e-32	3.51975e-30
SELENOS	15q26.3	0.482785	0.482785	7.79986e-32	3.55544e-30
CINP	14q32.31	0.482783	0.482783	7.80441e-32	3.55544e-30
PCM1	8p22	-0.482738	0.482738	7.92064e-32	3.60021e-30
NDUFB9	8q24.13	0.48251	0.48251	8.53912e-32	3.87255e-30
MGAT5	2q21.2-q21.3	-0.482401	0.482401	8.85215e-32	4.00545e-30
RSBN1	1p13.2	-0.482106	0.482106	9.75176e-32	4.40257e-30
STAG1	3q22.3	-0.482085	0.482085	9.81986e-32	4.42335e-30
NENF	1q32.3	0.481866	0.481866	1.05524e-31	4.74267e-30
RBM34	1q42.3	0.481827	0.481827	1.06898e-31	4.79368e-30
DNAJC13	3q22.1	-0.481774	0.481774	1.0875e-31	4.86583e-30
ATF7	12q13.13	-0.481715	0.481715	1.10894e-31	4.95071e-30
TACC1	8p11.22	-0.481696	0.481696	1.11593e-31	4.97086e-30
CHD6	20q12	-0.481687	0.481687	1.11903e-31	4.97359e-30
WDFY1	2q36.1	-0.481488	0.481488	1.19483e-31	5.29876e-30
CFAP126	1q23.3	-0.481425	0.481425	1.21949e-31	5.39619e-30
PPM1D	17q23.3	-0.481415	0.481415	1.22377e-31	5.40319e-30
IKZF1	7p12.2	-0.481398	0.481398	1.23053e-31	5.42108e-30
SSBP1	7q34	0.481024	0.481024	1.391e-31	6.11459e-30
PREX2	8q13.2	-0.480961	0.480961	1.42004e-31	6.2286e-30
MAP3K1	5q11.2	-0.48093	0.48093	1.43451e-31	6.27832e-30
NDUFB1	14q31.3	0.480719	0.480719	1.53698e-31	6.71215e-30
BRD3	9q34.2	-0.480654	0.480654	1.56999e-31	6.8414e-30
GTF2I	7q11.23	-0.480216	0.480216	1.8116e-31	7.87711e-30
SMARCA2	9p24.3	-0.480127	0.480127	1.86523e-31	8.09276e-30
PLEKHM3	2q33.3	-0.479941	0.479941	1.98146e-31	8.57846e-30
ATRX	Xq21.1	-0.479722	0.479722	2.12872e-31	9.19616e-30
ATXN7L1	7q22.3	-0.479095	0.479095	2.61086e-31	1.12548e-29
WDR31	9q32	-0.47874	0.47874	2.9298e-31	1.26025e-29
MTX1	1q22	0.478723	0.478723	2.94683e-31	1.26486e-29
EXOSC4	8q24.3	0.478606	0.478606	3.06078e-31	1.31097e-29
AIMP1	4q24	0.478552	0.478552	3.11451e-31	1.33114e-29
TRAPPC10	21q22.3	-0.478435	0.478435	3.23586e-31	1.38006e-29
NDUFA12	12q22	0.478417	0.478417	3.25399e-31	1.38485e-29
RPS2	16p13.3	0.478025	0.478025	3.6953e-31	1.56933e-29
TAF10	11p15.4	0.477843	0.477843	3.92006e-31	1.66126e-29
ITGA8	10p13	-0.477449	0.477449	4.45321e-31	1.88322e-29
CCDC124	19p13.11	0.477341	0.477341	4.61256e-31	1.9465e-29
PRRC2C	1q24.3	-0.477294	0.477294	4.68321e-31	1.97216e-29
SETD1B	12q24.31	-0.477174	0.477174	4.86769e-31	2.04156e-29
NHSL2	Xq13.1	-0.477174	0.477174	4.86838e-31	2.04156e-29
LAMTOR5	1p13.3	0.476951	0.476951	5.23219e-31	2.18955e-29
ZNF687	1q21.3	-0.476932	0.476932	5.26366e-31	2.19813e-29
SLC25A40	7q21.12	-0.47683	0.47683	5.44088e-31	2.26741e-29
UQCRHL	1p36.21	0.476814	0.476814	5.46956e-31	2.27464e-29
COX4I1	16q24.1	0.476749	0.476749	5.584e-31	2.31742e-29
S100A2	1q21.3	0.47656	0.47656	5.93702e-31	2.45883e-29
CYCS	7p15.3	0.47651	0.47651	6.03216e-31	2.49308e-29
MRPL17	11p15.4	0.476414	0.476414	6.22309e-31	2.5667e-29
NDUFA1	Xq24	0.47616	0.47616	6.75292e-31	2.77951e-29
SNRPB2	20p12.1	0.476071	0.476071	6.95072e-31	2.85507e-29
KL	13q13.1	-0.47598	0.47598	7.15731e-31	2.93391e-29
ERH	14q24.1	0.475715	0.475715	7.79329e-31	3.18809e-29
TET2	4q24	-0.475602	0.475602	8.08219e-31	3.29561e-29
CLOCK	4q12	-0.4756	0.4756	8.089e-31	3.29561e-29
KLHDC10	7q32.2	-0.475364	0.475364	8.72547e-31	3.54771e-29
PHACTR4	1p35.3	-0.475232	0.475232	9.10464e-31	3.69438e-29
PUS1	12q24.33	0.475193	0.475193	9.21936e-31	3.73338e-29
SUB1	5p13.3	0.475151	0.475151	9.34362e-31	3.77606e-29
PI4KA	22q11.21	-0.475018	0.475018	9.75174e-31	3.93307e-29
SYT15	10q11.22	-0.47499	0.47499	9.84035e-31	3.96084e-29
UPP1	7p12.3	0.474854	0.474854	1.0278e-30	4.12871e-29
PPP1R16B	20q11.23	-0.474634	0.474634	1.10293e-30	4.42165e-29
RAN	12q24.33	0.474618	0.474618	1.10879e-30	4.43629e-29
RPL5	1p22.1	0.474569	0.474569	1.12636e-30	4.49758e-29
EYA3	1p35.3	-0.47418	0.47418	1.27568e-30	5.08371e-29
PRDX5	11q13.1	0.473941	0.473941	1.37706e-30	5.47683e-29
PDAP1	7q22.1	0.473903	0.473903	1.39389e-30	5.53277e-29
C2CD3	11q13.4	-0.473871	0.473871	1.40837e-30	5.5792e-29
VPS25	17q21.31	0.473782	0.473782	1.44899e-30	5.72711e-29
CETN2	Xq28	0.473777	0.473777	1.45142e-30	5.72711e-29
KCNA3	1p13.3	-0.473742	0.473742	1.46781e-30	5.78039e-29
DOC2B	17p13.3	-0.473217	0.473217	1.73548e-30	6.8211e-29
GARRE1	19q13.11	-0.472999	0.472999	1.86073e-30	7.29908e-29
NOP16	5q35.2	0.472799	0.472799	1.98294e-30	7.76329e-29
OSTC	4q25	0.472745	0.472745	2.01725e-30	7.88222e-29
PDPR	16q22.1	-0.472683	0.472683	2.05794e-30	8.01991e-29
CAMSAP1	9q34.3	-0.472679	0.472679	2.06049e-30	8.01991e-29
AURKAIP1	1p36.33	0.472667	0.472667	2.06798e-30	8.03347e-29
KANSL1	17q21.31	-0.472583	0.472583	2.12448e-30	8.23698e-29
PARP4	13q12.12	-0.472573	0.472573	2.13123e-30	8.24719e-29
RPL35	9q33.3	0.472246	0.472246	2.36451e-30	9.13229e-29
CYSLTR2	13q14.2	-0.47219	0.47219	2.40707e-30	9.27878e-29
NDUFB8	10q24.31	0.472182	0.472182	2.41382e-30	9.28694e-29
LMTK2	7q21.3	-0.472018	0.472018	2.54236e-30	9.76276e-29
SIRT3	11p15.5	0.471731	0.471731	2.78557e-30	1.06762e-28
RPL24	3q12.3	0.471651	0.471651	2.85691e-30	1.09288e-28
UHRF1BP1	6p21.31	-0.471637	0.471637	2.86957e-30	1.09563e-28
MAML2	11q21	-0.471523	0.471523	2.97569e-30	1.13399e-28
SAP30BP	17q25.1	0.471411	0.471411	3.08331e-30	1.17277e-28
MAGI3	1p13.2	-0.471372	0.471372	3.12184e-30	1.18517e-28
SWI5	9q34.11	0.471186	0.471186	3.31137e-30	1.25475e-28
IPCEF1	6q25.2	-0.471016	0.471016	3.49514e-30	1.32189e-28
EXOSC7	3p21.31	0.470965	0.470965	3.55212e-30	1.34091e-28
STAT3	17q21.2	-0.470834	0.470834	3.70203e-30	1.39487e-28
MRGBP	20q13.33	0.470731	0.470731	3.82456e-30	1.43834e-28
SUMF2	7p11.2	0.470655	0.470655	3.918e-30	1.47072e-28
FAT4	4q28.1	-0.4706	0.4706	3.98701e-30	1.49383e-28
LAX1	1q32.1	-0.470529	0.470529	4.07667e-30	1.52457e-28
SETX	9q34.13	-0.470322	0.470322	4.35342e-30	1.62503e-28
PES1	22q12.2	0.470293	0.470293	4.3933e-30	1.63687e-28
C1ORF50	1p34.2	0.470232	0.470232	4.47808e-30	1.66536e-28
PARK7	1p36.23	0.470057	0.470057	4.73327e-30	1.75701e-28
JPT1	17q25.1	0.469888	0.469888	4.99335e-30	1.85013e-28
HOMER3	19p13.11	0.46976	0.46976	5.19904e-30	1.92278e-28
RABGGTB	1p31.1	0.469637	0.469637	5.40461e-30	1.99513e-28
MYDGF	19p13.3	0.469513	0.469513	5.62046e-30	2.071e-28
ARHGEF6	Xq26.3	-0.469332	0.469332	5.94894e-30	2.18801e-28
YAE1	7p14.1	0.4693	0.4693	6.00949e-30	2.20623e-28
TNRC6B	22q13.1	-0.469174	0.469174	6.25239e-30	2.29121e-28
ZMAT3	3q26.32	-0.468841	0.468841	6.94364e-30	2.53988e-28
VPS13D	1p36.22-p36.21	-0.468821	0.468821	6.98859e-30	2.55166e-28
KBTBD7	13q14.11	-0.468326	0.468326	8.16497e-30	2.97576e-28
ZC3H12D	6q25.1	-0.468184	0.468184	8.53791e-30	3.10603e-28
ZFAS1	20q13.13	0.468035	0.468035	8.94633e-30	3.24872e-28
METTL26	16p13.3	0.46773	0.46773	9.84187e-30	3.56746e-28
PRDM2	1p36.21	-0.467717	0.467717	9.88255e-30	3.57574e-28
RPL19	17q12	0.467663	0.467663	1.00507e-29	3.63001e-28
NCOA4	10q11.22	-0.467644	0.467644	1.01128e-29	3.64587e-28
RSC1A1	1p36.21	-0.467422	0.467422	1.084e-29	3.90105e-28
EIF5A	17p13.1	0.467407	0.467407	1.08906e-29	3.91221e-28
SNF8	17q21.32	0.467392	0.467392	1.0943e-29	3.92354e-28
TNKS	8p23.1	-0.467387	0.467387	1.09613e-29	3.92354e-28
GATAD2B	1q21.3	-0.46731	0.46731	1.12255e-29	4.01097e-28
CCDC167	6p21.2	0.467178	0.467178	1.1699e-29	4.17273e-28
RTL8C	Xq26.3	0.46706	0.46706	1.21397e-29	4.3222e-28
SEC11A	15q25.2	0.466955	0.466955	1.25453e-29	4.45871e-28
LIN54	4q21.22	-0.466756	0.466756	1.3349e-29	4.73595e-28
ZBED3	5q13.3	-0.466558	0.466558	1.42022e-29	5.02745e-28
TMED3	15q25.1	0.466554	0.466554	1.42208e-29	5.02745e-28
CASS4	20q13.31	-0.4665	0.4665	1.44598e-29	5.10293e-28
ARFGEF2	20q13.13	-0.466418	0.466418	1.48371e-29	5.2269e-28
RPL27A	11p15.4	0.466376	0.466376	1.50341e-29	5.28701e-28
SF3B5	6q24.2	0.46637	0.46637	1.50615e-29	5.28734e-28
PSMB1	6q27	0.466344	0.466344	1.51841e-29	5.32107e-28
BCL7C	16p11.2	0.466319	0.466319	1.53045e-29	5.35389e-28
GUK1	1q42.13	0.466274	0.466274	1.55178e-29	5.41906e-28
BDP1	5q13.2	-0.466257	0.466257	1.56017e-29	5.4389e-28
ZKSCAN1	7q22.1	-0.46596	0.46596	1.71156e-29	5.9563e-28
GTF2F2	13q14.12-q14.13	0.465953	0.465953	1.71512e-29	5.95834e-28
BRCA2	13q13.1	-0.465875	0.465875	1.75715e-29	6.09378e-28
ARHGAP35	19q13.32	-0.465757	0.465757	1.8229e-29	6.31088e-28
HERC2	15q13.1	-0.465615	0.465615	1.90574e-29	6.58629e-28
DOCK8	9p24.3	-0.465534	0.465534	1.95402e-29	6.74155e-28
CDC14C	7p12.3	-0.465467	0.465467	1.99548e-29	6.87275e-28
VPS13C	15q22.2	-0.465409	0.465409	2.03169e-29	6.98545e-28
YIF1A	11q13.2	0.465314	0.465314	2.09244e-29	7.18202e-28
RABAC1	19q13.2	0.465216	0.465216	2.1572e-29	7.38889e-28
DRAP1	11q13.1	0.465212	0.465212	2.16008e-29	7.38889e-28
PWP1	12q23.3	0.465075	0.465075	2.25381e-29	7.69635e-28
ZNF551	19q13.43	-0.464886	0.464886	2.39027e-29	8.14847e-28
RCSD1	1q24.2	-0.464714	0.464714	2.52135e-29	8.58071e-28
MYCBP2	13q22.3	-0.464453	0.464453	2.73422e-29	9.28938e-28
MRTO4	1p36.13	0.464434	0.464434	2.75021e-29	9.32792e-28
AR	Xq12	-0.464318	0.464318	2.85121e-29	9.65413e-28
EDF1	9q34.3	0.464279	0.464279	2.88518e-29	9.75267e-28
ZNF37A	10p11.1	-0.464174	0.464174	2.98131e-29	1.00607e-27
C16ORF91	16p13.3	0.464078	0.464078	3.07106e-29	1.03461e-27
COX6A1	12q24.31	0.463945	0.463945	3.1997e-29	1.07614e-27
RASSF3	12q14.2	-0.463849	0.463849	3.29681e-29	1.10694e-27
CDKL5	Xp22.13	-0.463572	0.463572	3.59096e-29	1.20369e-27
CNIH4	1q42.11	0.463416	0.463416	3.76832e-29	1.26104e-27
PUM2	2p24.1	-0.463345	0.463345	3.85235e-29	1.287e-27
DOCK2	5q35.1	-0.463254	0.463254	3.96189e-29	1.3214e-27
WIPF2	17q21.2	-0.463234	0.463234	3.98689e-29	1.32753e-27
KNL1	15q15.1	-0.463078	0.463078	4.18345e-29	1.39067e-27
IL2RB	22q12.3	-0.462945	0.462945	4.35844e-29	1.44313e-27
SRP14	15q22	0.462943	0.462943	4.36196e-29	1.44313e-27
TPR	1q31.1	-0.462942	0.462942	4.36287e-29	1.44313e-27
POLR2J	7q22.1	0.462817	0.462817	4.53452e-29	1.49744e-27
PIAS1	15q23	-0.462611	0.462611	4.83088e-29	1.59268e-27
POLR2G	11q12.3	0.462576	0.462576	4.88328e-29	1.60731e-27
TTBK2	15q15.2	-0.461958	0.461958	5.90763e-29	1.94129e-27
PRPF8	17p13.3	-0.461903	0.461903	6.00757e-29	1.97089e-27
PRR12	19q13.33	-0.461727	0.461727	6.34165e-29	2.0771e-27
ZNF236	18q23	-0.461686	0.461686	6.42272e-29	2.10022e-27
CHMP4A	14q12	0.461588	0.461588	6.61823e-29	2.16062e-27
WDR83OS	19p13.13	0.461568	0.461568	6.66055e-29	2.17091e-27
ZCCHC2	18q21.33	-0.46155	0.46155	6.69637e-29	2.17904e-27
RPS15A	16p12.3	0.461481	0.461481	6.83979e-29	2.2221e-27
PSMD13	11p15.5	0.461357	0.461357	7.1063e-29	2.30495e-27
CCNQ	Xq28	0.461319	0.461319	7.18884e-29	2.32795e-27
SBNO1	12q24.31	-0.461306	0.461306	7.21774e-29	2.33354e-27
WDTC1	1p36.11	-0.461285	0.461285	7.2631e-29	2.34443e-27
LRRC37A4P	17q21.31	-0.46126	0.46126	7.31954e-29	2.35884e-27
TRIM33	1p13.2	-0.461194	0.461194	7.46938e-29	2.40327e-27
MAML1	5q35.3	-0.460968	0.460968	8.00457e-29	2.57134e-27
AKAP13	15q25.3	-0.460848	0.460848	8.30519e-29	2.66364e-27
ZNRD2	11q13.1	0.46084	0.46084	8.32647e-29	2.6662e-27
NOL7	6p23	0.460592	0.460592	8.9827e-29	2.87174e-27
OSBPL11	3q21.2	-0.46043	0.46043	9.44022e-29	3.0132e-27
RPS13	11p15.1	0.460211	0.460211	1.00935e-28	3.21659e-27
KDELR2	7p22.1	0.46019	0.46019	1.01596e-28	3.23252e-27
XCR1	3p21.31	-0.460072	0.460072	1.05299e-28	3.34505e-27
EXOSC1	10q24.1	0.460052	0.460052	1.05965e-28	3.36088e-27
COX7A2L	2p21	0.459966	0.459966	1.08774e-28	3.44452e-27
NSMCE1	16p12.1	0.459909	0.459909	1.1068e-28	3.49935e-27
UQCRQ	5q31.1	0.459807	0.459807	1.14179e-28	3.60429e-27
MRPL58	17q25.1	0.459516	0.459516	1.24786e-28	3.93292e-27
NUP153	6p22.3	-0.459432	0.459432	1.28029e-28	4.02879e-27
PRRC2B	9q34.13	-0.45936	0.45936	1.30883e-28	4.11214e-27
CCT7	2p13.2	0.459296	0.459296	1.3347e-28	4.18686e-27
PPP1R12B	1q32.1	-0.459258	0.459258	1.34996e-28	4.22811e-27
NDUFS6	5p15.33	0.459227	0.459227	1.36283e-28	4.25528e-27
NAT9	17q25.2	0.459225	0.459225	1.36384e-28	4.25528e-27
BRPF3	6p21.31	-0.459222	0.459222	1.365e-28	4.25528e-27
YIF1B	19q13.2	0.459052	0.459052	1.43782e-28	4.47532e-27
POLK	5q13.3	-0.458969	0.458969	1.47441e-28	4.58209e-27
S100A3	1q21.3	0.458936	0.458936	1.4894e-28	4.62153e-27
TPD52L2	20q13.33	0.458697	0.458697	1.60191e-28	4.96294e-27
INO80D	2q33.3	-0.458575	0.458575	1.66221e-28	5.14181e-27
MPG	16p13.3	0.458029	0.458029	1.9619e-28	6.05952e-27
KIF27	9q21.32	-0.458015	0.458015	1.97051e-28	6.07675e-27
C1ORF122	1p34.3	0.457901	0.457901	2.04018e-28	6.28193e-27
SNRNP200	2q11.2	-0.457854	0.457854	2.0691e-28	6.36122e-27
CD200R1	3q13.2	-0.45782	0.45782	2.09049e-28	6.41712e-27
SMS	Xp22.11	0.457483	0.457483	2.31523e-28	7.09615e-27
HSD17B1	17q21.2	0.457355	0.457355	2.40719e-28	7.36674e-27
ARHGAP31	3q13.32-q13.33	-0.457326	0.457326	2.42838e-28	7.42026e-27
PHC3	3q26.2	-0.457274	0.457274	2.46665e-28	7.52572e-27
PSMB3	17q12	0.457167	0.457167	2.54797e-28	7.76203e-27
VDAC2	10q22.2	0.456924	0.456924	2.74284e-28	8.34298e-27
HDDC2	6q22.31	0.456906	0.456906	2.75772e-28	8.37552e-27
BCAP31	Xq28	0.456805	0.456805	2.84272e-28	8.62062e-27
FBXO22-AS1	15q24.2	0.456588	0.456588	3.03531e-28	9.19076e-27
PHACTR2	6q24.2	-0.45649	0.45649	3.12718e-28	9.45464e-27
CD3G	11q23.3	-0.456337	0.456337	3.27482e-28	9.88611e-27
AHSA1	14q24.3	0.456324	0.456324	3.28802e-28	9.91104e-27
DCAF1	3p21.2	-0.456281	0.456281	3.33032e-28	1.00235e-26
GGCT	7p14.3	0.456223	0.456223	3.38978e-28	1.01871e-26
ZFYVE16	5q14.1	-0.456017	0.456017	3.60638e-28	1.08219e-26
KCNAB2	1p36.31	-0.456008	0.456008	3.61658e-28	1.08362e-26
NEU3	11q13.4	-0.455842	0.455842	3.80229e-28	1.13756e-26
BRIP1	17q23.2	-0.455645	0.455645	4.03407e-28	1.20511e-26
COX7A2	6q14.1	0.45558	0.45558	4.11387e-28	1.22712e-26
ZBTB39	12q13.3	-0.455546	0.455546	4.15662e-28	1.23803e-26
MYO9A	15q23	-0.455362	0.455362	4.39287e-28	1.30646e-26
UBA52	19p13.1-p12	0.45525	0.45525	4.54346e-28	1.34924e-26
PREX1	20q13.13	-0.455231	0.455231	4.56982e-28	1.35506e-26
TRAPPC3	1p34.3	0.455091	0.455091	4.76637e-28	1.41125e-26
MOB1A	2p13.1	-0.455025	0.455025	4.86194e-28	1.43743e-26
STOX2	4q35.1	-0.454933	0.454933	4.99792e-28	1.47545e-26
RPS26	12q13.2	0.454685	0.454685	5.38461e-28	1.58727e-26
UQCRH	1p33	0.454616	0.454616	5.4976e-28	1.61767e-26
MRPL21	11q13.3	0.454612	0.454612	5.50387e-28	1.61767e-26
UBE2V1	20q13.13	0.4546	0.4546	5.52356e-28	1.62108e-26
BCL2	18q21.33	-0.45456	0.45456	5.59025e-28	1.63825e-26
LILRA1	19q13.42	-0.454538	0.454538	5.62823e-28	1.64698e-26
POLD4	11q13.2	0.454461	0.454461	5.75873e-28	1.68271e-26
TPRKB	2p13.1	0.454395	0.454395	5.87493e-28	1.71416e-26
PMM2	16p13.2	0.45436	0.45436	5.93598e-28	1.72946e-26
KIAA2026	9p24.1	-0.454197	0.454197	6.23421e-28	1.81108e-26
SMC1A	Xp11.22	-0.454197	0.454197	6.23421e-28	1.81108e-26
SIN3A	15q24.2	-0.454102	0.454102	6.41311e-28	1.86036e-26
SHE	1q21.3	-0.453663	0.453663	7.31435e-28	2.11873e-26
FDX2	19p13.2	0.453626	0.453626	7.39485e-28	2.13896e-26
SUCNR1	3q25.1	-0.453508	0.453508	7.66171e-28	2.21295e-26
DPY19L3	19q13.11	-0.453384	0.453384	7.95016e-28	2.29296e-26
BOLA3	2p13.1	0.453378	0.453378	7.96582e-28	2.29418e-26
NKAP	Xq24	0.453218	0.453218	8.35396e-28	2.40251e-26
TPI1	12p13.31	0.452763	0.452763	9.57178e-28	2.7488e-26
ZMYM4	1p34.3	-0.452589	0.452589	1.0081e-27	2.89089e-26
POLR1H	6p22.1	0.452544	0.452544	1.02165e-27	2.92557e-26
KIAA1958	9q32	-0.45244	0.45244	1.0539e-27	3.01362e-26
DPM2	9q34.11	0.452408	0.452408	1.06378e-27	3.03752e-26
CERT1	5q13.3	-0.45236	0.45236	1.07929e-27	3.07744e-26
PIK3R1	5q13.1	-0.452083	0.452083	1.1722e-27	3.33761e-26
RBBP5	1q32.1	-0.452055	0.452055	1.18172e-27	3.35993e-26
MRPL40	22q11.21	0.451971	0.451971	1.21194e-27	3.44099e-26
TCP11L2	12q23.3	-0.45189	0.45189	1.24134e-27	3.51948e-26
HUWE1	Xp11.22	-0.451625	0.451625	1.3431e-27	3.80261e-26
NUDT1	7p22.3	0.451611	0.451611	1.34864e-27	3.8129e-26
ADNP	20q13.13	-0.451602	0.451602	1.3524e-27	3.81814e-26
EIF2B4	2p23.3	0.451567	0.451567	1.36664e-27	3.85293e-26
CDC37	19p13.2	0.451501	0.451501	1.39348e-27	3.92309e-26
RAB19	7q34	-0.451486	0.451486	1.39967e-27	3.93498e-26
STYXL1	7q11.23	0.451379	0.451379	1.44494e-27	4.05655e-26
CHCHD5	2q14.1	0.45134	0.45134	1.46174e-27	4.09797e-26
RBM27	5q32	-0.451214	0.451214	1.51729e-27	4.24779e-26
MRPL41	9q34.3	0.451191	0.451191	1.52797e-27	4.27172e-26
EIF1	17q21.2	0.451153	0.451153	1.54536e-27	4.31431e-26
ZNF646	16p11.2	-0.451084	0.451084	1.57709e-27	4.39551e-26
SRI	7q21.12	0.45108	0.45108	1.57883e-27	4.39551e-26
ZNF831	20q13.32	-0.451075	0.451075	1.58113e-27	4.39581e-26
SPN	16p11.2	-0.451056	0.451056	1.59025e-27	4.41504e-26
TRMT61A	14q32.33	0.450888	0.450888	1.67139e-27	4.63389e-26
NT5C	17q25	0.450682	0.450682	1.77653e-27	4.91859e-26
CMC2	16q23.2	0.450643	0.450643	1.79735e-27	4.96935e-26
CPEB3	10q23.32	-0.450627	0.450627	1.80581e-27	4.98588e-26
MRPS21	1q21.2	0.450517	0.450517	1.86575e-27	5.13813e-26
ADAR	1q21.3	-0.450516	0.450516	1.86608e-27	5.13813e-26
MRPL36	5p15.33	0.450293	0.450293	1.9935e-27	5.48144e-26
FAM161B	14q24.3	-0.450272	0.450272	2.00587e-27	5.50789e-26
PIN4	Xq13.1	0.45023	0.45023	2.03117e-27	5.56974e-26
USP49	6p21.1	-0.450198	0.450198	2.05037e-27	5.61471e-26
GIGYF2	2q37.1	-0.450024	0.450024	2.15855e-27	5.90289e-26
COX17	3q13.33	0.449815	0.449815	2.29606e-27	6.27037e-26
DYNLRB1	20q11.22	0.449596	0.449596	2.44978e-27	6.68106e-26
DAG1	3p21.31	-0.44959	0.44959	2.45393e-27	6.68329e-26
PSMD8	19q13.2	0.449531	0.449531	2.49683e-27	6.79091e-26
CACNA2D1	7q21.11	-0.449443	0.449443	2.56273e-27	6.9607e-26
FKBP2	11q13.1	0.449227	0.449227	2.7312e-27	7.40825e-26
ATP5IF1	1p35.3	0.448982	0.448982	2.93622e-27	7.95359e-26
SLC6A6	3p25.1	-0.448942	0.448942	2.97057e-27	8.03578e-26
NDUFA13	19p13.11	0.448845	0.448845	3.05653e-27	8.25716e-26
ROCK2	2p25.1	-0.44883	0.44883	3.07015e-27	8.2828e-26
SENP1	12q13.11	-0.448719	0.448719	3.17193e-27	8.54587e-26
SLC30A6	2p22.3	-0.448583	0.448583	3.30153e-27	8.88311e-26
NBEAL1	2q33.2	-0.447993	0.447993	3.92757e-27	1.05534e-25
RPL8	8q24.3	0.447906	0.447906	4.02846e-27	1.081e-25
JMY	5q14.1	-0.447822	0.447822	4.12986e-27	1.10673e-25
RBL1	20q11.23	-0.447582	0.447582	4.43082e-27	1.18579e-25
RANBP1	22q11.21	0.447398	0.447398	4.67569e-27	1.24966e-25
DPCD	10q24.32	0.447263	0.447263	4.86481e-27	1.29847e-25
PLCL1	2q33.1	-0.447255	0.447255	4.87672e-27	1.29992e-25
MAGOH	1p32.3	0.4472	0.4472	4.95471e-27	1.31895e-25
COA6	1q42.2	0.447172	0.447172	4.99638e-27	1.32828e-25
TCF20	22q13.2	-0.447112	0.447112	5.08466e-27	1.34996e-25
CYB5RL	1p32.3	-0.446999	0.446999	5.25536e-27	1.39343e-25
CELF2	10p14	-0.44697	0.44697	5.30037e-27	1.40351e-25
SETD2	3p21.31	-0.446955	0.446955	5.32458e-27	1.40756e-25
IPMK	10q21.1	-0.446951	0.446951	5.32972e-27	1.40756e-25
NR1D2	3p24.2	-0.44687	0.44687	5.45806e-27	1.43956e-25
CHD1	5q15-q21.1	-0.446804	0.446804	5.56428e-27	1.46565e-25
C1D	2p14	0.446674	0.446674	5.77946e-27	1.52033e-25
C14ORF119	14q11.2	0.446512	0.446512	6.05952e-27	1.59117e-25
EMC7	15q14	0.446509	0.446509	6.06461e-27	1.59117e-25
TCEAL4	Xq22.2	0.446436	0.446436	6.19605e-27	1.62353e-25
CCDC186	10q25.3	-0.446371	0.446371	6.31523e-27	1.65259e-25
CX3CR1	3p22.2	-0.446271	0.446271	6.50286e-27	1.69948e-25
SMAD9	13q13.3	-0.446251	0.446251	6.53955e-27	1.70684e-25
SYNJ2	6q25.3	-0.446245	0.446245	6.55199e-27	1.70786e-25
ZNHIT2	11q13.1	0.446183	0.446183	6.67103e-27	1.73663e-25
ELOF1	19p13.2	0.446154	0.446154	6.72799e-27	1.74919e-25
BRMS1	11q13.2	0.446111	0.446111	6.81328e-27	1.76907e-25
AKAP11	13q14.11	-0.446019	0.446019	6.99787e-27	1.81465e-25
CARNMT1	9q21.13	-0.445951	0.445951	7.13754e-27	1.84847e-25
TLR1	4p14	-0.44592	0.44592	7.20299e-27	1.86302e-25
CENPT	16q22.1	0.445886	0.445886	7.27512e-27	1.87925e-25
ZYG11B	1p32.3	-0.445778	0.445778	7.50781e-27	1.93686e-25
ITK	5q33.3	-0.445744	0.445744	7.5837e-27	1.95392e-25
CISD3	17q12	0.445722	0.445722	7.63122e-27	1.96364e-25
THEMIS	6q22.33	-0.445707	0.445707	7.66529e-27	1.96988e-25
PTRH1	9q34.11	0.445684	0.445684	7.71669e-27	1.98055e-25
EP400	12q24.33	-0.445674	0.445674	7.73948e-27	1.98386e-25
ATG101	12q13.13	0.445328	0.445328	8.55891e-27	2.1911e-25
TIAF1	17q11.2	0.445307	0.445307	8.61225e-27	2.20195e-25
C8ORF76	8q24.13	0.445246	0.445246	8.76713e-27	2.23869e-25
PRR14L	22q12.2	-0.445158	0.445158	8.99359e-27	2.2936e-25
PIK3R4	3q22.1	-0.444726	0.444726	1.01956e-26	2.59683e-25
BANF1	11q13.1	0.444657	0.444657	1.04035e-26	2.64643e-25
EMC8	16q24.1	0.444408	0.444408	1.11841e-26	2.84138e-25
LAMTOR2	1q22	0.444255	0.444255	1.16898e-26	2.96611e-25
NAXE	1q22	0.444219	0.444219	1.18137e-26	2.99376e-25
SLFN5	17q12	-0.444174	0.444174	1.19682e-26	3.02907e-25
NIBAN1	1q25.3	-0.444079	0.444079	1.23021e-26	3.10965e-25
CSF2RB	22q12.3	-0.443808	0.443808	1.33092e-26	3.35997e-25
PLCL2	3p24.3	-0.443745	0.443745	1.35526e-26	3.41713e-25
RIPOR2	6p22.3	-0.443735	0.443735	1.35897e-26	3.42219e-25
KIF2A	5q12.1	-0.443713	0.443713	1.3677e-26	3.43984e-25
USP24	1p32.3	-0.443657	0.443657	1.39002e-26	3.49161e-25
RASEF	9q21.32	-0.443572	0.443572	1.42479e-26	3.57445e-25
BAG4	8p11.23	-0.443374	0.443374	1.50879e-26	3.78047e-25
NDUFC1	4q31.1	0.443336	0.443336	1.52545e-26	3.81743e-25
MYL12B	18p11.31	0.443308	0.443308	1.53793e-26	3.84386e-25
IKZF2	2q34	-0.443265	0.443265	1.55692e-26	3.88649e-25
GJD3	17q21.2	-0.443116	0.443116	1.62573e-26	4.0532e-25
RPA3	7p21.3	0.443013	0.443013	1.6748e-26	4.17035e-25
CTNNBL1	20q11.23	0.442998	0.442998	1.68185e-26	4.1827e-25
TRIAP1	12q24.31	0.442637	0.442637	1.86696e-26	4.63734e-25
LCMT1	16p12.1	0.442548	0.442548	1.91554e-26	4.75211e-25
USP12	13q12.13	-0.442474	0.442474	1.95647e-26	4.84764e-25
CCS	11q13.2	0.442321	0.442321	2.04481e-26	5.06027e-25
FAM102B	1p13.3	-0.44224	0.44224	2.09339e-26	5.17411e-25
ZNF510	9q22.33	-0.442067	0.442067	2.19988e-26	5.43062e-25
SNRPA1	15q26.3	0.442039	0.442039	2.21791e-26	5.46839e-25
SIRT1	10q21.3	-0.441907	0.441907	2.30382e-26	5.67323e-25
CNR2	1p36.11	-0.44177	0.44177	2.39636e-26	5.89386e-25
COX7B	Xq21.1	0.441669	0.441669	2.46695e-26	6.06006e-25
RPS8	1p34.1	0.441637	0.441637	2.4901e-26	6.10943e-25
NCR1	19q13.42	-0.441327	0.441327	2.72158e-26	6.66921e-25
ABHD2	15q26.1	-0.441284	0.441284	2.75553e-26	6.74415e-25
STRN	2p22.2	-0.441108	0.441108	2.89832e-26	7.08499e-25
UBE2F	2q37.3	0.440986	0.440986	3.00137e-26	7.32796e-25
TMEM147	19q13.12	0.440919	0.440919	3.05968e-26	7.46123e-25
EPB41	1p35.3	-0.440811	0.440811	3.15638e-26	7.68768e-25
SP4	7p15.3	-0.440742	0.440742	3.21922e-26	7.83121e-25
PER3	1p36.23	-0.440653	0.440653	3.3028e-26	8.0248e-25
METTL1	12q14.1	0.440591	0.440591	3.36144e-26	8.1574e-25
SSU72	1p36.33	0.44051	0.44051	3.44093e-26	8.33413e-25
CZIB	1p32.3	0.440508	0.440508	3.44258e-26	8.33413e-25
SNRPC	6p21.31	0.440433	0.440433	3.51726e-26	8.50464e-25
NDUFS8	11q13.2	0.440418	0.440418	3.53284e-26	8.53203e-25
CLBA1	14q32.33	0.440399	0.440399	3.55167e-26	8.56718e-25
KIAA1671	22q11.23	-0.440315	0.440315	3.63841e-26	8.76587e-25
ZFAND2A	7p22.3	0.440288	0.440288	3.66588e-26	8.82143e-25
NOTCH2	1p12	-0.440249	0.440249	3.70795e-26	8.91198e-25
CCT3	1q22	0.440226	0.440226	3.73148e-26	8.9578e-25
SATB1	3p24.3	-0.440217	0.440217	3.74105e-26	8.97001e-25
GTF3C4	9q34.13	-0.440188	0.440188	3.77243e-26	9.03444e-25
ZBTB20	3q13.31	-0.440168	0.440168	3.79417e-26	9.07568e-25
CENPX	17q25.3	0.440147	0.440147	3.81704e-26	9.11948e-25
NTMT1	9q34.11	0.440062	0.440062	3.91088e-26	9.33257e-25
ERGIC3	20q11.22	0.440053	0.440053	3.92133e-26	9.34638e-25
ZNF445	3p21.31	-0.440011	0.440011	3.96825e-26	9.44699e-25
ANKFY1	17p13.2	-0.439927	0.439927	4.06485e-26	9.66547e-25
HIP1	7q11.23	-0.439917	0.439917	4.07683e-26	9.68247e-25
ATP6V0B	1p34.1	0.439873	0.439873	4.12828e-26	9.79306e-25
FOXP3	Xp11.23	-0.439861	0.439861	4.14204e-26	9.80637e-25
RASA2	3q23	-0.43986	0.43986	4.14368e-26	9.80637e-25
EBPL	13q14.2	0.439854	0.439854	4.15074e-26	9.8115e-25
CRYBG3	3q11.2	-0.439829	0.439829	4.18117e-26	9.87181e-25
PRDM10	11q24.3	-0.439732	0.439732	4.29788e-26	1.01354e-24
DCUN1D5	11q22.3	0.43965	0.43965	4.40039e-26	1.0365e-24
TLR7	Xp22.2	-0.439629	0.439629	4.42587e-26	1.04127e-24
MANBAL	20q11.23	0.439621	0.439621	4.43627e-26	1.0425e-24
RPS25	11q23.3	0.439477	0.439477	4.62227e-26	1.08494e-24
AGL	1p21.2	-0.43942	0.43942	4.69904e-26	1.10166e-24
ATAD3B	1p36.33	0.439001	0.439001	5.29522e-26	1.23998e-24
SECISBP2L	15q21.1	-0.438945	0.438945	5.38056e-26	1.2585e-24
RPL13	16q24.3	0.438903	0.438903	5.44575e-26	1.27226e-24
PPM1L	3q25.33-q26.1	-0.438626	0.438626	5.89144e-26	1.37478e-24
GNPTAB	12q23.2	-0.438571	0.438571	5.98455e-26	1.39489e-24
KAT7	17q21.33	-0.438567	0.438567	5.99245e-26	1.39511e-24
ZNF507	19q13.11	-0.438406	0.438406	6.27329e-26	1.4588e-24
PIGF	2p21	0.438382	0.438382	6.31513e-26	1.46682e-24
RBM12B	8q22.1	-0.438337	0.438337	6.39657e-26	1.48402e-24
RREB1	6p24.3	-0.438329	0.438329	6.41117e-26	1.48465e-24
TCEAL9	Xq22.2	0.438328	0.438328	6.41409e-26	1.48465e-24
PLPP3	1p32.2	-0.438047	0.438047	6.94696e-26	1.60613e-24
ARL6IP4	12q24.31	0.437886	0.437886	7.27266e-26	1.6795e-24
XPO4	13q12.11	-0.437865	0.437865	7.31477e-26	1.68728e-24
CIC	19q13.2	-0.437783	0.437783	7.4876e-26	1.72516e-24
ELF2	4q31.1	-0.437749	0.437749	7.56075e-26	1.74001e-24
SNU13	22q13.2	0.437741	0.437741	7.57652e-26	1.74164e-24
SP2	17q21.32	-0.437718	0.437718	7.62621e-26	1.75106e-24
VKORC1	16p11.2	0.43768	0.43768	7.70974e-26	1.76821e-24
COPZ1	12q13.13	0.437549	0.437549	8.00113e-26	1.83295e-24
HTRA2	2p13.1	0.437424	0.437424	8.29131e-26	1.89725e-24
UBE2E3	2q31.3	0.437024	0.437024	9.28493e-26	2.12219e-24
CAPN12	19q13.2	0.436946	0.436946	9.49213e-26	2.16708e-24
CTCF	16q22.1	-0.436661	0.436661	1.02892e-25	2.34639e-24
FKBP1A	20p13	0.436643	0.436643	1.03416e-25	2.35566e-24
CSNK2B	6p21.33	0.436583	0.436583	1.05186e-25	2.39324e-24
RASSF2	20p13	-0.436494	0.436494	1.07862e-25	2.45134e-24
FAU	11q13.1	0.436479	0.436479	1.08332e-25	2.45925e-24
PSMA4	15q25.1	0.436285	0.436285	1.14429e-25	2.59472e-24
RPS19	19q13.2	0.436181	0.436181	1.17829e-25	2.6688e-24
POP5	12q24.31	0.436086	0.436086	1.21058e-25	2.73884e-24
DHX8	17q21.31	-0.43592	0.43592	1.26868e-25	2.86705e-24
TRANK1	3p22.2	-0.435867	0.435867	1.28748e-25	2.90625e-24
RGL1	1q25.3	-0.435823	0.435823	1.30369e-25	2.93954e-24
BAZ1B	7q11.23	-0.435768	0.435768	1.3241e-25	2.98221e-24
MEMO1	2p22.3	0.435756	0.435756	1.32839e-25	2.98852e-24
FRMD3	9q21.32	-0.435536	0.435536	1.41346e-25	3.17632e-24
EML4	2p21	-0.435455	0.435455	1.44624e-25	3.24635e-24
IRF2	4q35.1	-0.435258	0.435258	1.52862e-25	3.42744e-24
SBF2	11p15.4	-0.435187	0.435187	1.55935e-25	3.49241e-24
RPS12	6q23.2	0.435165	0.435165	1.56908e-25	3.51028e-24
UBXN7	3q29	-0.435109	0.435109	1.59415e-25	3.56241e-24
SASH1	6q24.3-q25.1	-0.435061	0.435061	1.61564e-25	3.60316e-24
MAU2	19p13.11	-0.435061	0.435061	1.61599e-25	3.60316e-24
ZXDA	Xp11.21	-0.434991	0.434991	1.64802e-25	3.67051e-24
TBC1D9	4q31.21	-0.434838	0.434838	1.72055e-25	3.8278e-24
BRWD3	Xq21.1	-0.434828	0.434828	1.72509e-25	3.83364e-24
KIFC2	8q24.3	0.434783	0.434783	1.74724e-25	3.87856e-24
MTUS1	8p22	-0.434532	0.434532	1.87481e-25	4.15715e-24
EIF2B3	1p34.1	0.434487	0.434487	1.89848e-25	4.20498e-24
VPS29	12q24.11	0.434426	0.434426	1.9315e-25	4.27339e-24
EIF3H	8q23.3-q24.11	0.434389	0.434389	1.95141e-25	4.31267e-24
TMTC2	12q21.31	-0.434367	0.434367	1.96383e-25	4.33535e-24
GTF3C6	6q21	0.434344	0.434344	1.97628e-25	4.35804e-24
ADNP2	18q23	-0.434328	0.434328	1.98529e-25	4.37309e-24
MTG1	10q26.3	0.434287	0.434287	2.00826e-25	4.41884e-24
TIMM8B	11q23.1	0.434116	0.434116	2.10719e-25	4.63143e-24
ARF5	7q32.1	0.434002	0.434002	2.1751e-25	4.77546e-24
AKAP9	7q21.2	-0.433871	0.433871	2.25656e-25	4.94887e-24
SCAF11	12q12	-0.433854	0.433854	2.26747e-25	4.96737e-24
BOD1L1	4p15.33	-0.433746	0.433746	2.33694e-25	5.11398e-24
APPL1	3p14.3	-0.43374	0.43374	2.34092e-25	5.1171e-24
EIF3D	22q12.3	0.433698	0.433698	2.36846e-25	5.17166e-24
IFT20	17q11.2	0.433635	0.433635	2.4112e-25	5.25924e-24
ANXA2	15q22.2	0.433477	0.433477	2.52024e-25	5.4911e-24
CCKAR	4p15.2	-0.433393	0.433393	2.5802e-25	5.61565e-24
INCENP	11q12.3	-0.433321	0.433321	2.63209e-25	5.72238e-24
TIMM8A	Xq22.1	0.433219	0.433219	2.7085e-25	5.8821e-24
TRAPPC2B	19q13.43	0.433208	0.433208	2.71676e-25	5.89366e-24
MIF	22q11.23	0.433049	0.433049	2.84031e-25	6.15502e-24
AIMP2	7p22.1	0.432882	0.432882	2.97585e-25	6.44178e-24
ANKRD17	4q13.3	-0.432866	0.432866	2.98906e-25	6.46339e-24
CD5	11q12.2	-0.432848	0.432848	3.00431e-25	6.48937e-24
KPTN	19q13.32	0.43273	0.43273	3.10473e-25	6.69906e-24
SELENOW	19q13.33	0.432715	0.432715	3.11785e-25	6.72014e-24
NIT1	1q23.3	0.432468	0.432468	3.34086e-25	7.19308e-24
TIMM23	10q11.22	0.432388	0.432388	3.41605e-25	7.34706e-24
TRIM44	11p13	-0.432293	0.432293	3.50788e-25	7.5365e-24
BAZ2B	2q24.2	-0.432188	0.432188	3.61166e-25	7.75114e-24
TMEM273	10q11.23	-0.432071	0.432071	3.73088e-25	7.99844e-24
STX1A	7q11.23	0.432062	0.432062	3.74054e-25	8.0106e-24
TASOR2	10p15.1	-0.432048	0.432048	3.75481e-25	8.03257e-24
PHF12	17q11.2	-0.432041	0.432041	3.76293e-25	8.04137e-24
PFN1	17p13.2	0.431994	0.431994	3.81169e-25	8.13689e-24
GMCL1	2p13.3	-0.431981	0.431981	3.82623e-25	8.15247e-24
HSPB11	1p32.3	0.43198	0.43198	3.82712e-25	8.15247e-24
UQCC3	11q12.3	0.431908	0.431908	3.90467e-25	8.30881e-24
TRAPPC8	18q12.1	-0.431825	0.431825	3.99547e-25	8.49302e-24
SLC39A4	8q24.3	0.431793	0.431793	4.03169e-25	8.56093e-24
OPHN1	Xq12	-0.431771	0.431771	4.05652e-25	8.59909e-24
ZNF148	3q21.2	-0.431769	0.431769	4.05824e-25	8.59909e-24
PSMA3	14q23.1	0.431706	0.431706	4.1305e-25	8.74297e-24
TUBB4A	19p13.3	0.431595	0.431595	4.25964e-25	9.00681e-24
TMEM141	9q34.3	0.431483	0.431483	4.39431e-25	9.28177e-24
MBNL1	3q25.1-q25.2	-0.431277	0.431277	4.65377e-25	9.81946e-24
UBE2V2	8q11.21	0.431259	0.431259	4.67732e-25	9.85877e-24
MAP3K2	2q14.3	-0.431249	0.431249	4.68957e-25	9.8742e-24
ARFRP1	20q13.33	0.43107	0.43107	4.92807e-25	1.03572e-23
MTOR	1p36.22	-0.43107	0.43107	4.92928e-25	1.03572e-23
SNRPD1	18q11.2	0.431058	0.431058	4.94569e-25	1.03808e-23
TAF1D	11q21	0.430991	0.430991	5.03744e-25	1.05623e-23
C1ORF52	1p22.3	0.430781	0.430781	5.34049e-25	1.1186e-23
RPS9	19q13.42	0.430739	0.430739	5.40207e-25	1.13032e-23
UCHL3	13q22.2	0.430726	0.430726	5.4227e-25	1.13345e-23
CSF1	1p13.3	-0.43072	0.43072	5.43095e-25	1.13399e-23
GLRX3	10q26.3	0.430713	0.430713	5.44202e-25	1.13512e-23
SIK2	11q23.1	-0.430606	0.430606	5.60582e-25	1.16807e-23
MDN1	6q15	-0.43058	0.43058	5.647e-25	1.17543e-23
VEZF1	17q22	-0.430508	0.430508	5.76074e-25	1.19786e-23
NDUFB10	16p13.3	0.43028	0.43028	6.13503e-25	1.27437e-23
MAD1L1	7p22.3	0.430189	0.430189	6.29145e-25	1.30551e-23
MZT2B	2q21.1	0.430099	0.430099	6.45075e-25	1.33718e-23
FRRS1	1p21.2	-0.429915	0.429915	6.78709e-25	1.40545e-23
LTN1	21q21.3	-0.429843	0.429843	6.92462e-25	1.43245e-23
SNX20	16q12.1	-0.429688	0.429688	7.22751e-25	1.49356e-23
MSL2	3q22.3	-0.429609	0.429609	7.38675e-25	1.5249e-23
SRRM2	16p13.3	-0.429565	0.429565	7.47751e-25	1.54204e-23
DLG5	10q22.3	-0.429534	0.429534	7.54067e-25	1.55347e-23
MIR4435-2HG	2q13	0.429396	0.429396	7.83304e-25	1.61205e-23
ATM	11q22.3	-0.429319	0.429319	8.00322e-25	1.64538e-23
MORN2	2p22.1	0.429219	0.429219	8.22649e-25	1.68955e-23
ACER2	9p22.1	-0.429082	0.429082	8.54264e-25	1.75268e-23
CRELD2	22q13.33	0.428589	0.428589	9.78598e-25	2.00573e-23
BCAS4	20q13.13	0.428575	0.428575	9.82447e-25	2.01156e-23
KIAA1109	4q27	-0.428113	0.428113	1.11542e-24	2.2815e-23
IDE	10q23.33	-0.428091	0.428091	1.12235e-24	2.29333e-23
ELF1	13q14.11	-0.42802	0.42802	1.14437e-24	2.33594e-23
CCT4	2p15	0.427953	0.427953	1.16576e-24	2.37719e-23
EEF1D	8q24.3	0.427862	0.427862	1.195e-24	2.43433e-23
MED8	1p34.2	0.427842	0.427842	1.20172e-24	2.44471e-23
JAK2	9p24.1	-0.427839	0.427839	1.20268e-24	2.44471e-23
ZFP91	11q12.1	-0.427836	0.427836	1.20376e-24	2.44471e-23
CUTA	6p21.32	0.427789	0.427789	1.21925e-24	2.47367e-23
P2RY14	3q25.1	-0.427781	0.427781	1.22201e-24	2.47677e-23
APRT	16q24.3	0.427768	0.427768	1.22633e-24	2.48301e-23
SLC35E2A	1p36.33	-0.427309	0.427309	1.39078e-24	2.81314e-23
UFD1	22q11.21	0.427273	0.427273	1.40491e-24	2.83885e-23
PIK3C2A	11p15.1	-0.427084	0.427084	1.47954e-24	2.98665e-23
GTF2A2	15q22.2	0.426995	0.426995	1.51574e-24	3.05663e-23
KIAA1217	10p12.2-p12.1	-0.426835	0.426835	1.58373e-24	3.19055e-23
ATP5PF	21q21.3	0.426667	0.426667	1.65826e-24	3.33733e-23
ZFX	Xp22.11	-0.426419	0.426419	1.77475e-24	3.56819e-23
SRSF9	12q24.31	0.426357	0.426357	1.80479e-24	3.62495e-23
NELFE	6p21.33	0.426309	0.426309	1.82887e-24	3.66927e-23
GIT2	12q24.11	-0.426306	0.426306	1.83052e-24	3.66927e-23
JMJD6	17q25.1	0.426247	0.426247	1.85986e-24	3.72437e-23
USP34	2p15	-0.426221	0.426221	1.87324e-24	3.74741e-23
SCNM1	1q21.3	0.426143	0.426143	1.91389e-24	3.82492e-23
ATOX1	5q33.1	0.426125	0.426125	1.92318e-24	3.83965e-23
URB1	21q22.11	-0.426002	0.426002	1.98895e-24	3.96701e-23
PTPRB	12q15	-0.425985	0.425985	1.99813e-24	3.98136e-23
TOMM22	22q13.1	0.425948	0.425948	2.01815e-24	4.01726e-23
DNMT1	19p13.2	-0.425927	0.425927	2.02961e-24	4.03606e-23
LSM8	7q31.31	0.425917	0.425917	2.03536e-24	4.0435e-23
CNOT1	16q21	-0.425725	0.425725	2.14466e-24	4.25642e-23
QSER1	11p13	-0.425681	0.425681	2.17087e-24	4.30417e-23
BCLAF1	6q23.3	-0.42554	0.42554	2.25571e-24	4.46795e-23
MLF2	12p13.31	0.425511	0.425511	2.27357e-24	4.49888e-23
SYNE1	6q25.2	-0.425233	0.425233	2.45284e-24	4.84884e-23
INO80	15q15.1	-0.425009	0.425009	2.60683e-24	5.14816e-23
CCM2	7p13	0.424908	0.424908	2.67911e-24	5.2809e-23
GPR31	6q27	-0.424908	0.424908	2.67931e-24	5.2809e-23
ARHGAP20	11q22.3-q23.1	-0.424823	0.424823	2.74161e-24	5.39838e-23
E2F8	11p15.1	-0.424787	0.424787	2.76889e-24	5.44676e-23
MEA1	6p21.1	0.424708	0.424708	2.82922e-24	5.55998e-23
PPARA	22q13.31	-0.424685	0.424685	2.84666e-24	5.58877e-23
CASP8AP2	6q15	-0.424655	0.424655	2.87038e-24	5.62983e-23
GRPEL1	4p16.1	0.424578	0.424578	2.93075e-24	5.7426e-23
NF1	17q11.2	-0.42455	0.42455	2.9534e-24	5.78134e-23
NSMCE2	8q24.13	0.424513	0.424513	2.98257e-24	5.83275e-23
ERCC4	16p13.12	-0.424233	0.424233	3.21878e-24	6.28855e-23
ENTPD4	8p21.3	-0.42414	0.42414	3.30055e-24	6.44201e-23
KLHL8	4q22.1	-0.424031	0.424031	3.40004e-24	6.62974e-23
FRS2	12q15	-0.423925	0.423925	3.49872e-24	6.81554e-23
OTUD4	4q31.21	-0.423914	0.423914	3.50906e-24	6.82904e-23
ATP5MG	11q23.3	0.423892	0.423892	3.53071e-24	6.86451e-23
ERN1	17q23.3	-0.423727	0.423727	3.69148e-24	7.17012e-23
SLX4IP	20p12.2	-0.42357	0.42357	3.85197e-24	7.47462e-23
LRRK1	15q26.3	-0.423555	0.423555	3.86759e-24	7.49767e-23
RUNX1T1	8q21.3	-0.423545	0.423545	3.87855e-24	7.51164e-23
MED23	6q23.2	-0.423468	0.423468	3.95955e-24	7.66112e-23
ATP6V0E1	5q35.1	0.423451	0.423451	3.97812e-24	7.68963e-23
PCGF5	10q23.32	-0.423355	0.423355	4.08291e-24	7.88459e-23
HELB	12q14.3	-0.42332	0.42332	4.1213e-24	7.95105e-23
KIT	4q12	-0.423312	0.423312	4.13024e-24	7.96065e-23
DCP1A	3p21.1	-0.423308	0.423308	4.13505e-24	7.96226e-23
UBR4	1p36.13	-0.423195	0.423195	4.26294e-24	8.20064e-23
ARPC5L	9q33.3	0.423086	0.423086	4.39073e-24	8.43836e-23
ARHGEF12	11q23.3	-0.423075	0.423075	4.40336e-24	8.45454e-23
USP33	1p31.1	-0.422989	0.422989	4.50737e-24	8.64596e-23
LYPLA2	1p36.11	0.422916	0.422916	4.59733e-24	8.81009e-23
S100A13	1q21.3	0.422903	0.422903	4.61318e-24	8.83201e-23
EIF6	20q11.22	0.42285	0.42285	4.6801e-24	8.95158e-23
RIDA	8q22.2	0.422842	0.422842	4.69056e-24	8.96304e-23
ANKHD1	5q31.3	-0.422745	0.422745	4.81452e-24	9.19114e-23
NFATC3	16q22.1	-0.422695	0.422695	4.87987e-24	9.30704e-23
HIVEP2	6q24.2	-0.422588	0.422588	5.02293e-24	9.57078e-23
SPTBN1	2p16.2	-0.422525	0.422525	5.10953e-24	9.72655e-23
RNASEK	17p13.1	0.422506	0.422506	5.13483e-24	9.76544e-23
HECW2	2q32.3	-0.422462	0.422462	5.19655e-24	9.87344e-23
RANBP2	2q13	-0.42243	0.42243	5.24203e-24	9.95043e-23
PSMC5	17q23.3	0.422235	0.422235	5.52383e-24	1.04754e-22
FIS1	7q22.1	0.422186	0.422186	5.59817e-24	1.06064e-22
TNRC6C	17q25.3	-0.422104	0.422104	5.72298e-24	1.08326e-22
RAPGEF2	4q32.1	-0.422091	0.422091	5.74331e-24	1.08608e-22
EEF2K	16p12.2	-0.422036	0.422036	5.82824e-24	1.1011e-22
SMG1	16p12.3	-0.422031	0.422031	5.83686e-24	1.10169e-22
RAB13	1q21.3	0.421919	0.421919	6.01509e-24	1.13427e-22
EIF3M	11p13	0.421891	0.421891	6.0609e-24	1.14183e-22
TIMM10	11q12.1	0.421786	0.421786	6.23427e-24	1.17339e-22
RPS7	2p25.3	0.421709	0.421709	6.36541e-24	1.19695e-22
ATP5MC1	17q21.32	0.421587	0.421587	6.57791e-24	1.23575e-22
USP54	10q22.2	-0.421476	0.421476	6.77601e-24	1.27177e-22
PSMB7	9q33.3	0.42079	0.42079	8.14655e-24	1.52757e-22
SUGCT	7p14.1	0.420747	0.420747	8.24278e-24	1.54417e-22
COL4A4	2q36.3	-0.420657	0.420657	8.44435e-24	1.58046e-22
CD40LG	Xq26.3	-0.420613	0.420613	8.54324e-24	1.59747e-22
ZNF354C	5q35.3	-0.420401	0.420401	9.04211e-24	1.68918e-22
ANKRD13D	11q13.2	0.420312	0.420312	9.26043e-24	1.72836e-22
SSH2	17q11.2	-0.420093	0.420093	9.82136e-24	1.83134e-22
P2RY12	3q25.1	-0.419879	0.419879	1.03985e-23	1.93716e-22
TOP1MT	8q24.3	0.419823	0.419823	1.05563e-23	1.96473e-22
TMEM101	17q21.31	0.419817	0.419817	1.05713e-23	1.9657e-22
ATP8A1	4p13	-0.419721	0.419721	1.08461e-23	2.01493e-22
SIGLEC5	19q13.41	-0.419599	0.419599	1.12074e-23	2.07852e-22
PHF3	6q12	-0.419598	0.419598	1.12092e-23	2.07852e-22
MRPS18C	4q21.23	0.41953	0.41953	1.14153e-23	2.11321e-22
RAMAC	15q25.2	0.419529	0.419529	1.14173e-23	2.11321e-22
MAP3K3	17q23.3	-0.419418	0.419418	1.17604e-23	2.1747e-22
PPIE	1p34.2	0.419227	0.419227	1.23783e-23	2.28684e-22
HSBP1	16q23.3	0.419075	0.419075	1.28888e-23	2.37897e-22
PGP	16p13.3	0.418934	0.418934	1.33834e-23	2.46799e-22
RASGEF1B	4q21.21	-0.418849	0.418849	1.369e-23	2.52221e-22
TMEM249	8q24.3	0.418649	0.418649	1.44386e-23	2.65768e-22
RPS27	1q21.3	0.418306	0.418306	1.58193e-23	2.90915e-22
ARID4B	1q42.3	-0.418233	0.418233	1.61277e-23	2.96315e-22
EVI2B	17q11.2	-0.41817	0.41817	1.64032e-23	3.01101e-22
DUS1L	17q25.3	0.418046	0.418046	1.69522e-23	3.10894e-22
BEX3	Xq22.2	0.418005	0.418005	1.71348e-23	3.13956e-22
SIPA1L3	19q13.13-q13.2	-0.417992	0.417992	1.71956e-23	3.14782e-22
RFNG	17q25.3	0.417897	0.417897	1.76355e-23	3.22541e-22
RAB27B	18q21.2	-0.41785	0.41785	1.78582e-23	3.26316e-22
RTL6	22q13.31	-0.417717	0.417717	1.84996e-23	3.37727e-22
C19ORF33	19q13.2	0.417648	0.417648	1.88429e-23	3.43681e-22
SF3A1	22q12.2	-0.417627	0.417627	1.8944e-23	3.45211e-22
MRPS33	7q34	0.417423	0.417423	2.00006e-23	3.64134e-22
EIF5AL1	10q22.3	0.417329	0.417329	2.05035e-23	3.72951e-22
RPL35A	3q29	0.417249	0.417249	2.09466e-23	3.80665e-22
ATXN1L	16q22.2	-0.41723	0.41723	2.10475e-23	3.82153e-22
TECPR1	7q21.3	-0.417189	0.417189	2.1277e-23	3.8597e-22
ARHGEF11	1q23.1	-0.417133	0.417133	2.15957e-23	3.91397e-22
MNAT1	14q23.1	0.417007	0.417007	2.23299e-23	4.04338e-22
PROX1	1q32.3	-0.417	0.417	2.23718e-23	4.04732e-22
ISCA2	14q24.3	0.416938	0.416938	2.27404e-23	4.11029e-22
ZNF835	19q13.43	-0.416917	0.416917	2.28707e-23	4.13013e-22
ADA2	22q11.1	-0.416869	0.416869	2.3161e-23	4.17878e-22
ZNF90	19p12	0.416616	0.416616	2.47675e-23	4.4646e-22
TRAPPC5	19p13.2	0.41648	0.41648	2.56732e-23	4.62371e-22
PLSCR4	3q24	-0.416399	0.416399	2.62282e-23	4.71942e-22
MAGOHB	12p13.2	0.416348	0.416348	2.65814e-23	4.77869e-22
UROD	1p34.1	0.4163	0.4163	2.69249e-23	4.83611e-22
GBP4	1p22.2	-0.4162	0.4162	2.76467e-23	4.96131e-22
FOXP2	7q31.1	-0.416164	0.416164	2.79108e-23	5.00422e-22
RPS3A	4q31.3	0.41612	0.41612	2.8235e-23	5.05782e-22
RABEPK	9q33.3	0.416099	0.416099	2.83945e-23	5.08186e-22
CTSS	1q21.3	-0.416044	0.416044	2.88093e-23	5.15149e-22
STT3B	3p23	-0.415996	0.415996	2.91766e-23	5.21253e-22
NDUFAF4	6q16.1	0.415938	0.415938	2.96231e-23	5.28757e-22
MYLIP	6p22.3	-0.415845	0.415845	3.03621e-23	5.41466e-22
CTDSPL2	15q15.3-q21.1	-0.415786	0.415786	3.0834e-23	5.49393e-22
ITGAL	16p11.2	-0.415691	0.415691	3.1619e-23	5.6288e-22
ANAPC15	11q13.4	0.415641	0.415641	3.20388e-23	5.69847e-22
SLC18A2	10q25.3	-0.415584	0.415584	3.25222e-23	5.77933e-22
RNF111	15q22.1-q22.2	-0.415551	0.415551	3.28074e-23	5.82483e-22
DNLZ	9q34.3	0.415531	0.415531	3.29839e-23	5.851e-22
MRPL43	10q24.31	0.415434	0.415434	3.38354e-23	5.99674e-22
DNAJC16	1p36.21	-0.415362	0.415362	3.44822e-23	6.10596e-22
NUDC	1p36.11	0.415283	0.415283	3.52083e-23	6.22904e-22
CHMP2A	19q13.43	0.415227	0.415227	3.57275e-23	6.31532e-22
AMER1	Xq11.2	-0.415219	0.415219	3.58037e-23	6.31766e-22
HM13	20q11.21	0.415219	0.415219	3.58037e-23	6.31766e-22
SEMA3G	3p21.1	-0.415204	0.415204	3.59432e-23	6.33668e-22
PABPN1	14q11.2	0.414861	0.414861	3.93387e-23	6.92921e-22
USP9X	Xp11.4	-0.414835	0.414835	3.96066e-23	6.97028e-22
CLSPN	1p34.3	-0.414758	0.414758	4.04231e-23	7.10772e-22
CDC34	19p13.3	0.414603	0.414603	4.21024e-23	7.39651e-22
MRPS14	1q25.1	0.414564	0.414564	4.25398e-23	7.46681e-22
F5	1q24.2	-0.414481	0.414481	4.34704e-23	7.62348e-22
THSD7A	7p21.3	-0.414461	0.414461	4.3696e-23	7.64767e-22
LRBA	4q31.3	-0.41446	0.41446	4.37089e-23	7.64767e-22
GPR141	7p14.1	-0.414459	0.414459	4.37228e-23	7.64767e-22
PROSER3	19q13.12	-0.414341	0.414341	4.50938e-23	7.88061e-22
NIFK	2q14.3	0.414203	0.414203	4.67639e-23	8.16535e-22
AKAP5	14q23.3	-0.414125	0.414125	4.77289e-23	8.3266e-22
KDR	4q12	-0.414082	0.414082	4.82749e-23	8.41452e-22
DTD1	20p11.23	0.414072	0.414072	4.84021e-23	8.42937e-22
HRAS	11p15.5	0.414053	0.414053	4.86383e-23	8.46315e-22
MT1X	16q13	0.414024	0.414024	4.90092e-23	8.52028e-22
WASF2	1p36.11	-0.413756	0.413756	5.25798e-23	9.13312e-22
PPIP5K2	5q21.1	-0.413752	0.413752	5.26345e-23	9.1347e-22
SDF2L1	22q11.21	0.413689	0.413689	5.35093e-23	9.2785e-22
SSR2	1q22	0.413671	0.413671	5.37535e-23	9.31277e-22
RRP36	6p21.1	0.413644	0.413644	5.41432e-23	9.3722e-22
CD96	3q13.13-q13.2	-0.413619	0.413619	5.44912e-23	9.4243e-22
NUFIP2	17q11.2	-0.413281	0.413281	5.95425e-23	1.0289e-21
EMD	Xq28	0.413265	0.413265	5.97816e-23	1.03215e-21
NUP160	11p11.2	-0.413236	0.413236	6.0241e-23	1.03918e-21
SRP19	5q22.2	0.413204	0.413204	6.07468e-23	1.04701e-21
TAF1	Xq13.1	-0.41312	0.41312	6.20892e-23	1.06923e-21
SPIN1	9q22.1	-0.413108	0.413108	6.22963e-23	1.07187e-21
NBPF10	1q21.1	-0.413015	0.413015	6.38229e-23	1.0972e-21
PSMD7	16q23.1	0.413004	0.413004	6.40103e-23	1.09947e-21
RSF1	11q14.1	-0.412742	0.412742	6.85416e-23	1.1763e-21
MINDY2	15q21.3-q22.1	-0.412473	0.412473	7.35251e-23	1.26074e-21
CDK12	17q12	-0.412451	0.412451	7.39583e-23	1.26709e-21
CLIC5	6p21.1	-0.412348	0.412348	7.59709e-23	1.30046e-21
GMPPA	2q35	0.41232	0.41232	7.65169e-23	1.30869e-21
STARD8	Xq13.1	-0.412259	0.412259	7.77484e-23	1.32862e-21
STS	Xp22.31	-0.412106	0.412106	8.09009e-23	1.38131e-21
SDHAF2	11q12.2	0.41205	0.41205	8.21009e-23	1.40061e-21
NCKAP1L	12q13.13-q13.2	-0.412043	0.412043	8.22562e-23	1.40206e-21
CFL1	11q13.1	0.412021	0.412021	8.27202e-23	1.40877e-21
RPS19BP1	22q13.1	0.41181	0.41181	8.73933e-23	1.4871e-21
RPL28	19q13.42	0.411759	0.411759	8.8556e-23	1.50473e-21
CNOT9	2q35	-0.411758	0.411758	8.85799e-23	1.50473e-21
DUS2	16q22.1	0.411681	0.411681	9.03843e-23	1.53322e-21
TNS1	2q35	-0.411679	0.411679	9.041e-23	1.53322e-21
KCNJ2	17q24.3	-0.411553	0.411553	9.34352e-23	1.58319e-21
BMPR2	2q33.1-q33.2	-0.411519	0.411519	9.42732e-23	1.59603e-21
PMM1	22q13.2	0.411489	0.411489	9.49997e-23	1.60655e-21
NRROS	3q29	-0.411487	0.411487	9.50547e-23	1.60655e-21
PER2	2q37.3	-0.411483	0.411483	9.51498e-23	1.60681e-21
ST6GAL1	3q27.3	-0.41144	0.41144	9.62293e-23	1.62367e-21
MPHOSPH6	16q23.3	0.411278	0.411278	1.00354e-22	1.69184e-21
CLIC1	6p21.33	0.411179	0.411179	1.02974e-22	1.73455e-21
TMEM140	7q33	-0.411119	0.411119	1.04586e-22	1.76022e-21
SH3BGRL3	1p36.11	0.4111	0.4111	1.05114e-22	1.76763e-21
MTR	1q43	-0.411028	0.411028	1.07082e-22	1.79922e-21
NFIX	19p13.13	-0.41097	0.41097	1.08701e-22	1.82488e-21
PRELID1	5q35.3	0.410964	0.410964	1.08865e-22	1.82611e-21
WDR54	2p13.1	0.410961	0.410961	1.08977e-22	1.82646e-21
RPL41	12q13	0.410807	0.410807	1.13398e-22	1.89897e-21
TIMM22	17p13	0.410684	0.410684	1.17089e-22	1.95914e-21
DENND1C	19p13.3	-0.410668	0.410668	1.17561e-22	1.9654e-21
SUSD6	14q24.1	-0.410557	0.410557	1.20991e-22	2.02106e-21
SLF2	10q24.31	-0.410453	0.410453	1.24308e-22	2.07472e-21
DERL2	17p13.2	0.410406	0.410406	1.25811e-22	2.09807e-21
NAA38	17p13.1	0.410277	0.410277	1.30116e-22	2.16806e-21
H2AJ	12p12.3	0.410197	0.410197	1.32829e-22	2.21143e-21
PBDC1	Xq13.3	0.410111	0.410111	1.35829e-22	2.2595e-21
TNFRSF9	1p36.23	-0.410067	0.410067	1.37373e-22	2.28329e-21
CCR2	3p21.31	-0.41	0.41	1.39766e-22	2.32113e-21
RGPD4	2q12.3	-0.409942	0.409942	1.41883e-22	2.35435e-21
MRPL2	6p21.1	0.409667	0.409667	1.52355e-22	2.52601e-21
FBXO21	12q24.22	-0.409408	0.409408	1.62884e-22	2.69835e-21
BTBD8	1p22.1	-0.409353	0.409353	1.65201e-22	2.73447e-21
SSH1	12q24.11	-0.409306	0.409306	1.67214e-22	2.76552e-21
HACD2	3q21.1	-0.40927	0.40927	1.688e-22	2.78944e-21
ZHX2	8q24.13	-0.409208	0.409208	1.7152e-22	2.83206e-21
ITGA4	2q31.3	-0.409188	0.409188	1.72404e-22	2.8443e-21
CTNND1	11q12.1	-0.409145	0.409145	1.74331e-22	2.87374e-21
ACAP2	3q29	-0.409068	0.409068	1.77821e-22	2.92886e-21
SLC8A1	2p22.1	-0.408829	0.408829	1.89112e-22	3.11228e-21
CDK10	16q24.3	0.408672	0.408672	1.969e-22	3.23778e-21
COPS6	7q22.1	0.408615	0.408615	1.9983e-22	3.28327e-21
EMC6	17p13.2	0.408547	0.408547	2.03341e-22	3.33823e-21
METRN	16p13.3	0.40831	0.40831	2.16145e-22	3.54552e-21
COX6B1	19q13.12	0.408111	0.408111	2.27463e-22	3.72813e-21
WDR74	11q12.3	0.40808	0.40808	2.29276e-22	3.75476e-21
LSP1P5	1q21.1	0.408053	0.408053	2.30922e-22	3.77858e-21
BLOC1S4	4p16.1	0.408049	0.408049	2.31107e-22	3.77858e-21
TTC37	5q15	-0.408003	0.408003	2.33894e-22	3.82104e-21
RNF150	4q31.21	-0.407922	0.407922	2.38782e-22	3.89771e-21
AMBRA1	11p11.2	-0.407894	0.407894	2.40521e-22	3.92289e-21
KDM6A	Xp11.3	-0.407764	0.407764	2.4868e-22	4.05268e-21
ACBD5	10p12.1	-0.407451	0.407451	2.6949e-22	4.38824e-21
NFKBIL1	6p21.33	0.407423	0.407423	2.71459e-22	4.41672e-21
BGLAP	1q22	0.407265	0.407265	2.82639e-22	4.59489e-21
MFSD10	4p16.3	0.407248	0.407248	2.83852e-22	4.61087e-21
MICOS13	19p13.3	0.407183	0.407183	2.88685e-22	4.68558e-21
WDR82	3p21.2	-0.407177	0.407177	2.89097e-22	4.68848e-21
TNXB	6p21.33-p21.32	-0.407125	0.407125	2.92934e-22	4.74686e-21
CD28	2q33.2	-0.407101	0.407101	2.94785e-22	4.77299e-21
ANKRD12	18p11.22	-0.406906	0.406906	3.09872e-22	5.01323e-21
ZNF462	9q31.2	-0.406796	0.406796	3.18749e-22	5.15268e-21
EMC4	15q14	0.406663	0.406663	3.29707e-22	5.32552e-21
PDIA3	15q15.3	0.406645	0.406645	3.31233e-22	5.34587e-21
RGP1	9p13.3	-0.406642	0.406642	3.31519e-22	5.34618e-21
USP51	Xp11.21	-0.40655	0.40655	3.39447e-22	5.46962e-21
GDI1	Xq28	0.406514	0.406514	3.42518e-22	5.51468e-21
S100A11	1q21.3	0.406466	0.406466	3.46739e-22	5.57816e-21
SKI	1p36.33-p36.32	-0.406462	0.406462	3.47181e-22	5.58078e-21
SNHG8	4q26	0.406431	0.406431	3.49939e-22	5.62062e-21
PPP4R2	3p13	-0.406374	0.406374	3.55054e-22	5.6982e-21
SS18L2	3p22.1	0.406256	0.406256	3.65859e-22	5.86692e-21
EEF1E1	6p24.3	0.406209	0.406209	3.70285e-22	5.93314e-21
DOP1B	21q22.12	-0.406052	0.406052	3.85479e-22	6.16873e-21
SNHG11	20q11.23	0.406051	0.406051	3.85604e-22	6.16873e-21
KLF11	2p25.1	-0.405965	0.405965	3.94166e-22	6.30068e-21
USP19	3p21.31	-0.405866	0.405866	4.04165e-22	6.45537e-21
DNAJC7	17q21.2	0.405811	0.405811	4.09885e-22	6.54152e-21
ERAP1	5q15	-0.405772	0.405772	4.14042e-22	6.6026e-21
NR3C2	4q31	-0.405757	0.405757	4.15602e-22	6.62221e-21
LSM7	19p13.3	0.405689	0.405689	4.22875e-22	6.73275e-21
DEXI	16p13.13	0.405684	0.405684	4.23354e-22	6.73502e-21
CIAPIN1	16q21	0.405572	0.405572	4.35608e-22	6.92448e-21
TNFRSF11A	18q21.33	-0.405543	0.405543	4.38843e-22	6.97038e-21
BCCIP	10q26.2	0.405465	0.405465	4.47664e-22	7.10484e-21
HEATR5B	2p22.2	-0.405403	0.405403	4.54781e-22	7.20456e-21
NOTCH1	9q34.3	-0.405402	0.405402	4.54937e-22	7.20456e-21
SMC3	10q25.2	-0.405401	0.405401	4.55025e-22	7.20456e-21
ZNF622	5p15.1	0.405207	0.405207	4.7813e-22	7.55846e-21
OTUB1	11q13.1	0.405207	0.405207	4.78131e-22	7.55846e-21
TASL	Xp21.2	-0.40518	0.40518	4.81433e-22	7.60467e-21
PDIK1L	1p36.11	-0.405158	0.405158	4.84049e-22	7.63997e-21
TEK	9p21.2	-0.405119	0.405119	4.88926e-22	7.71088e-21
MRPS7	17q25.1	0.405113	0.405113	4.89641e-22	7.71607e-21
IFTAP	11p12	0.405085	0.405085	4.93111e-22	7.76465e-21
UQCR11	19p13.3	0.405074	0.405074	4.94595e-22	7.78191e-21
RPL18	19q13.33	0.404959	0.404959	5.09241e-22	8.00607e-21
ALMS1	2p13.1	-0.404937	0.404937	5.1209e-22	8.04455e-21
ZNF318	6p21.1	-0.40492	0.40492	5.1427e-22	8.0722e-21
ZNF710	15q26.1	-0.404917	0.404917	5.14656e-22	8.0722e-21
NACA	12q23-q24.1	0.404877	0.404877	5.20016e-22	8.14989e-21
SRRD	22q12.1	0.404861	0.404861	5.22016e-22	8.17485e-21
STIL	1p33	-0.404625	0.404625	5.54418e-22	8.6755e-21
ZNF292	6q14.3	-0.404616	0.404616	5.55679e-22	8.68845e-21
PBX1	1q23.3	-0.404583	0.404583	5.60271e-22	8.75341e-21
MAPKAPK5-AS1	12q24.12	0.404545	0.404545	5.65796e-22	8.83284e-21
PRKCE	2p21	-0.404537	0.404537	5.66888e-22	8.843e-21
CCDC12	3p21.31	0.404424	0.404424	5.83407e-22	9.09362e-21
WDR48	3p22.2	-0.404363	0.404363	5.92421e-22	9.22694e-21
ZSWIM6	5q12.1	-0.404103	0.404103	6.32855e-22	9.84668e-21
FAM168A	11q13.4	-0.404101	0.404101	6.33194e-22	9.84668e-21
SUMO1	2q33.1	0.404079	0.404079	6.36793e-22	9.89498e-21
DDX46	5q31.1	-0.40406	0.40406	6.39852e-22	9.9348e-21
HSPE1	2q33.1	0.404008	0.404008	6.4824e-22	1.00573e-20
BAZ2A	12q13.3	-0.403921	0.403921	6.62704e-22	1.02737e-20
PJA2	5q21.3	-0.403867	0.403867	6.71933e-22	1.04087e-20
CBX5	12q13.13	-0.403808	0.403808	6.82018e-22	1.05568e-20
RNF149	2q11.2	0.40377	0.40377	6.88653e-22	1.06513e-20
KDELR1	19q13.33	0.403693	0.403693	7.02158e-22	1.08518e-20
TXN	9q31.3	0.403687	0.403687	7.03148e-22	1.08587e-20
MT2A	16q13	0.403653	0.403653	7.09228e-22	1.09442e-20
LINC00896	22q11.21	0.403641	0.403641	7.11398e-22	1.09692e-20
NLRC3	16p13.3	-0.403562	0.403562	7.25823e-22	1.1183e-20
STK19	6p21.33	0.40351	0.40351	7.35432e-22	1.13224e-20
NBDY	Xp11.21	0.403504	0.403504	7.36532e-22	1.13306e-20
RMI1	9q21.32	-0.403489	0.403489	7.39384e-22	1.13658e-20
MRPL24	1q23.1	0.403475	0.403475	7.42088e-22	1.13986e-20
BCL9	1q21.2	-0.403405	0.403405	7.55239e-22	1.15917e-20
NBR1	17q21.31	-0.403377	0.403377	7.60576e-22	1.16647e-20
AFF3	2q11.2	-0.403358	0.403358	7.64365e-22	1.17138e-20
RC3H1	1q25.1	-0.403159	0.403159	8.03626e-22	1.23061e-20
SNRNP35	12q24.31	0.403084	0.403084	8.19091e-22	1.25333e-20
STK17A	7p13	0.402824	0.402824	8.74803e-22	1.33756e-20
UHRF1BP1L	12q23.1	-0.402768	0.402768	8.87243e-22	1.35555e-20
RGS7BP	5q12.3	-0.402743	0.402743	8.92849e-22	1.36307e-20
DPM1	20q13.13	0.402711	0.402711	9.00011e-22	1.37296e-20
PSMA6	14q13.2	0.402559	0.402559	9.35244e-22	1.42563e-20
RASSF5	1q32.1	-0.402403	0.402403	9.7281e-22	1.48176e-20
ZNF804A	2q32.1	-0.402349	0.402349	9.85976e-22	1.50067e-20
PRELP	1q32.1	-0.402307	0.402307	9.96597e-22	1.51569e-20
PRKCB	16p12.2-p12.1	-0.402196	0.402196	1.02472e-21	1.55728e-20
TRAT1	3q13.13	-0.402119	0.402119	1.04476e-21	1.58654e-20
ZNF24	18q12.2	-0.40206	0.40206	1.06047e-21	1.60918e-20
MPEG1	11q12.1	-0.401986	0.401986	1.08037e-21	1.63812e-20
NUP214	9q34.13	-0.401962	0.401962	1.08714e-21	1.64714e-20
LSM10	1p34.3	0.401922	0.401922	1.0979e-21	1.66219e-20
TMEM234	1p35.2	0.401844	0.401844	1.11984e-21	1.69413e-20
LEMD2	6p21.31	0.401812	0.401812	1.12896e-21	1.70664e-20
MRPL12	17q25.3	0.401772	0.401772	1.14038e-21	1.7226e-20
NIPBL	5p13.2	-0.401753	0.401753	1.14584e-21	1.72954e-20
TAZ	Xq28	0.401749	0.401749	1.14698e-21	1.72996e-20
SP3	2q31.1	-0.401618	0.401618	1.18543e-21	1.78661e-20
NUDT22	11q13.1	0.40159	0.40159	1.19373e-21	1.79777e-20
TOP1P2	22q11.23	0.401549	0.401549	1.2059e-21	1.81474e-20
LY75	2q24.2	-0.401451	0.401451	1.236e-21	1.85864e-20
SMIM12	1p34.3	0.401426	0.401426	1.24384e-21	1.86896e-20
NDUFS4	5q11.2	0.401423	0.401423	1.24473e-21	1.86896e-20
EHF	11p13	-0.401406	0.401406	1.25023e-21	1.87582e-20
GSTP1	11q13.2	0.401362	0.401362	1.26404e-21	1.89511e-20
TLR3	4q35.1	-0.401335	0.401335	1.27269e-21	1.90666e-20
S100A6	1q21.3	0.401258	0.401258	1.29736e-21	1.94217e-20
PSMC6	14q22.1	0.4012	0.4012	1.31658e-21	1.96946e-20
SRM	1p36.22	0.401172	0.401172	1.32567e-21	1.98159e-20
SVIL	10p11.23	-0.400968	0.400968	1.39561e-21	2.08457e-20
FOXO4	Xq13.1	-0.400847	0.400847	1.43851e-21	2.14706e-20
ARHGAP11B	15q13.2	-0.400794	0.400794	1.45777e-21	2.17418e-20
FBXO34	14q22.3	-0.400739	0.400739	1.47807e-21	2.20282e-20
FAM217B	20q13.33	-0.400556	0.400556	1.54716e-21	2.30407e-20
SLC12A6	15q14	-0.4003	0.4003	1.6499e-21	2.45525e-20
EIF4EBP1	8p11.23	0.40016	0.40016	1.70875e-21	2.54094e-20
GLRX5	14q32.13	0.400042	0.400042	1.75973e-21	2.61481e-20
TMEM150C	4q21.22	-0.400035	0.400035	1.76289e-21	2.61756e-20
SHARPIN	8q24.3	0.399871	0.399871	1.8366e-21	2.72499e-20
RPL22	1p36.31	0.399858	0.399858	1.84257e-21	2.73183e-20
KCND3	1p13.2	-0.399835	0.399835	1.85303e-21	2.74531e-20
NUMA1	11q13.4	-0.399706	0.399706	1.914e-21	2.83354e-20
TXN2	22q12.3	0.399699	0.399699	1.91735e-21	2.8364e-20
CD2BP2	16p11.2	0.399571	0.399571	1.97983e-21	2.92668e-20
MFSD3	8q24.3	0.399526	0.399526	2.00181e-21	2.95698e-20
RBMX2	Xq26.1	0.399483	0.399483	2.02355e-21	2.9869e-20
PLEKHA7	11p15	-0.399324	0.399324	2.10557e-21	3.10567e-20
CEP120	5q23.2	-0.399288	0.399288	2.12444e-21	3.13121e-20
NDUFB7	19p13.12	0.399261	0.399261	2.1388e-21	3.15005e-20
VPS13A	9q21.2	-0.399133	0.399133	2.20835e-21	3.2501e-20
NEK4	3p21.1	-0.399114	0.399114	2.21882e-21	3.26312e-20
SLC3A2	11q12.3	0.399106	0.399106	2.22298e-21	3.26684e-20
RBSN	3p25.1	-0.399098	0.399098	2.22761e-21	3.27125e-20
PPAN	19p13.2	0.399087	0.399087	2.23385e-21	3.278e-20
HMOX2	16p13.3	0.399054	0.399054	2.25211e-21	3.30238e-20
LAMTOR4	7q22.1	0.399051	0.399051	2.25391e-21	3.3026e-20
GNAQ	9q21.2	-0.399029	0.399029	2.26598e-21	3.31786e-20
SLC40A1	2q32.2	-0.399015	0.399015	2.27414e-21	3.32739e-20
MGAT4A	2q11.2	-0.398948	0.398948	2.31242e-21	3.38093e-20
ZFAND4	10q11.22	-0.398936	0.398936	2.31919e-21	3.38834e-20
C4ORF3	4q26	0.398891	0.398891	2.34556e-21	3.42439e-20
NEURL1B	5q35.1	-0.398822	0.398822	2.38603e-21	3.48094e-20
MYRIP	3p22.1	-0.398607	0.398607	2.51764e-21	3.67027e-20
ROR1	1p31.3	-0.398546	0.398546	2.55572e-21	3.72307e-20
MAN1C1	1p36.11	-0.398414	0.398414	2.64145e-21	3.84515e-20
ZGPAT	20q13.33	0.398322	0.398322	2.70226e-21	3.93083e-20
PRRC2A	6p21.33	-0.398308	0.398308	2.71146e-21	3.94135e-20
NCOA6	20q11.22	-0.398143	0.398143	2.82517e-21	4.10366e-20
ZBTB40	1p36.12	-0.398114	0.398114	2.84544e-21	4.13011e-20
TRMU	22q13.31	0.398047	0.398047	2.89325e-21	4.19647e-20
KLHL23	2q31.1	-0.397981	0.397981	2.94155e-21	4.26344e-20
BNIP1	5q35.1	0.397932	0.397932	2.97732e-21	4.31216e-20
ZNF484	9q22.31	-0.397893	0.397893	3.00646e-21	4.35123e-20
CERS6	2q24.3	-0.39777	0.39777	3.09909e-21	4.48206e-20
HNRNPUL1	19q13.2	-0.397759	0.397759	3.10793e-21	4.4916e-20
C16ORF74	16q24.1	0.397701	0.397701	3.15308e-21	4.55357e-20
TRMT1	19p13.13	0.397632	0.397632	3.20753e-21	4.62887e-20
SURF2	9q34.2	0.397566	0.397566	3.26059e-21	4.70205e-20
MLLT6	17q12	-0.397528	0.397528	3.29143e-21	4.74311e-20
FAM3A	Xq28	0.397349	0.397349	3.44058e-21	4.95448e-20
DENND1B	1q31.3	-0.397342	0.397342	3.44641e-21	4.95931e-20
PSMB6	17p13.2	0.397264	0.397264	3.51355e-21	5.0523e-20
GNA13	17q24.1	-0.397193	0.397193	3.57608e-21	5.13853e-20
LPP	3q27.3-q28	-0.397178	0.397178	3.58925e-21	5.15376e-20
NPIPB3	16p12.2	0.396999	0.396999	3.7524e-21	5.38417e-20
SUMO2	17q25	0.396881	0.396881	3.86338e-21	5.53944e-20
TOR1AIP2	1q25.2	-0.396769	0.396769	3.97207e-21	5.69122e-20
CWC15	11q21	0.396646	0.396646	4.09462e-21	5.86263e-20
METTL17	14q11.2	0.396592	0.396592	4.14999e-21	5.93766e-20
TRIR	19p13.13	0.396558	0.396558	4.18423e-21	5.98237e-20
RGPD3	2q12.2	-0.396454	0.396454	4.29353e-21	6.13427e-20
RER1	1p36.32	0.396408	0.396408	4.34259e-21	6.19994e-20
ZFR	5p13.3	-0.396161	0.396161	4.61562e-21	6.58506e-20
MRPS6	21q22.11	0.396068	0.396068	4.72313e-21	6.73366e-20
PXK	3p14.3	-0.396049	0.396049	4.74501e-21	6.76004e-20
NUP98	11p15.4	-0.395981	0.395981	4.82548e-21	6.8698e-20
VCPIP1	8q13.1	-0.395962	0.395962	4.84813e-21	6.89714e-20
ANKRD28	3p25.1	-0.395946	0.395946	4.86754e-21	6.91984e-20
ABL1	9q34.12	-0.39582	0.39582	5.02068e-21	7.13249e-20
AP5Z1	7p22.1	0.395805	0.395805	5.03944e-21	7.15408e-20
DDT	22q11.23	0.39579	0.39579	5.0583e-21	7.17577e-20
HMBS	11q23.3	0.395751	0.395751	5.10724e-21	7.24007e-20
SIDT1	3q13.2	-0.395668	0.395668	5.21225e-21	7.38372e-20
MBD5	2q23.2	-0.395608	0.395608	5.28964e-21	7.48805e-20
DAGLB	7p22.1	0.395406	0.395406	5.55999e-21	7.8652e-20
SAT2	17p13.1	0.395194	0.395194	5.85778e-21	8.28062e-20
ACOT9	Xp22.11	0.39507	0.39507	6.03959e-21	8.53162e-20
AFF4	5q31.1	-0.395051	0.395051	6.06646e-21	8.56354e-20
TRAK2	2q33.1	-0.395031	0.395031	6.09636e-21	8.59969e-20
ARNT	1q21.3	-0.394997	0.394997	6.14843e-21	8.66704e-20
ATAD5	17q11.2	-0.39485	0.39485	6.37458e-21	8.97951e-20
CMTM1	16q21	-0.394831	0.394831	6.40359e-21	9.01404e-20
ACTR10	14q23.1	0.394746	0.394746	6.53959e-21	9.19902e-20
APOOL	Xq21.1	-0.394739	0.394739	6.55112e-21	9.20878e-20
ZBTB33	Xq24	-0.394703	0.394703	6.60879e-21	9.28334e-20
SNX29	16p13.13-p13.12	-0.394692	0.394692	6.62645e-21	9.30163e-20
EIF4A1	17p13.1	0.394504	0.394504	6.93959e-21	9.73436e-20
PODXL	7q32.3	-0.394255	0.394255	7.37742e-21	1.03413e-19
PPP4C	16p11.2	0.394204	0.394204	7.47033e-21	1.04642e-19
SELL	1q24.2	-0.394193	0.394193	7.49075e-21	1.0479e-19
USP38	4q31.21	-0.394192	0.394192	7.49137e-21	1.0479e-19
MIR205HG	1q32.2	0.394177	0.394177	7.51963e-21	1.05112e-19
SGK3	8q13.1	-0.394173	0.394173	7.52741e-21	1.05148e-19
TTC28	22q12.1	-0.394164	0.394164	7.54424e-21	1.05309e-19
VAMP8	2p11.2	0.394147	0.394147	7.57426e-21	1.05655e-19
CLNK	4p16.1	-0.394128	0.394128	7.61004e-21	1.0608e-19
BLVRA	7p13	0.394123	0.394123	7.62045e-21	1.06151e-19
TMF1	3p14.1	-0.394115	0.394115	7.63417e-21	1.06269e-19
NFU1	2p13.3	0.394031	0.394031	7.79317e-21	1.08407e-19
PEAK1	15q24.3	-0.39402	0.39402	7.81414e-21	1.08623e-19
KIAA0825	5q15	-0.393748	0.393748	8.35259e-21	1.16027e-19
CRAMP1	16p13.3	-0.393632	0.393632	8.5942e-21	1.19301e-19
SNHG3	1p35.3	0.393565	0.393565	8.73495e-21	1.21171e-19
P2RY8	Xp22.33 and Yp11.3	-0.393362	0.393362	9.18084e-21	1.27268e-19
CCDC137	17q25.3	0.393304	0.393304	9.31108e-21	1.28985e-19
TCF12	15q21.3	-0.393277	0.393277	9.37253e-21	1.29746e-19
SNRPB	20p13	0.393206	0.393206	9.53665e-21	1.31927e-19
RPL22L1	3q26.2	0.393054	0.393054	9.8985e-21	1.36838e-19
APOBEC3C	22q13.1	-0.392965	0.392965	1.01141e-20	1.39723e-19
NMRAL1	16p13.3	0.392922	0.392922	1.02211e-20	1.41104e-19
GCC2	2q12.3	-0.392851	0.392851	1.04014e-20	1.43493e-19
DBNL	7p13	0.392841	0.392841	1.04245e-20	1.43714e-19
RGS5	1q23.3	-0.392799	0.392799	1.05328e-20	1.45107e-19
DNAJC8	1p35.3	0.392745	0.392745	1.06714e-20	1.46915e-19
SMUG1	12q13.13	0.392734	0.392734	1.07011e-20	1.47223e-19
MFHAS1	8p23.1	-0.39271	0.39271	1.07645e-20	1.47993e-19
CBX6	22q13.1	-0.392685	0.392685	1.08309e-20	1.48805e-19
ZNF496	1q44	-0.392647	0.392647	1.09299e-20	1.50061e-19
ZMIZ1	10q22.3	-0.392577	0.392577	1.11186e-20	1.52548e-19
TMPPE	3p22.3	-0.392572	0.392572	1.11316e-20	1.52622e-19
MTX2	2q31.1	0.392565	0.392565	1.11504e-20	1.52775e-19
PPIH	1p34.2	0.392488	0.392488	1.13643e-20	1.556e-19
FAM214A	15q21.2-q21.3	-0.392383	0.392383	1.16573e-20	1.59502e-19
GIMAP7	7q36.1	-0.392223	0.392223	1.21219e-20	1.65745e-19
TXNDC16	14q22.1	-0.392216	0.392216	1.21407e-20	1.6589e-19
FAM177A1	14q13.2	0.392128	0.392128	1.24054e-20	1.69391e-19
FBXW11	5q35.1	-0.392089	0.392089	1.25228e-20	1.70877e-19
PLEKHG1	6q25.1	-0.39208	0.39208	1.25511e-20	1.71147e-19
SSB	2q31.1	0.391965	0.391965	1.29066e-20	1.75876e-19
SRGAP2	1q32.1	-0.391889	0.391889	1.31467e-20	1.79026e-19
SMC2	9q31.1	-0.391681	0.391681	1.38307e-20	1.88213e-19
RAI1	17p11.2	-0.391652	0.391652	1.39277e-20	1.89403e-19
GOLGB1	3q13.33	-0.391648	0.391648	1.39394e-20	1.89434e-19
ATR	3q23	-0.391544	0.391544	1.42989e-20	1.94188e-19
SLFN12L	17q12	-0.391468	0.391468	1.45646e-20	1.97662e-19
CASTOR2	7q11.23	-0.391367	0.391367	1.49264e-20	2.02435e-19
C16ORF96	16p13.3	-0.39134	0.39134	1.50242e-20	2.03625e-19
VPS13B	8q22.2	-0.391302	0.391302	1.51615e-20	2.05346e-19
LGALS1	22q13.1	0.391257	0.391257	1.53292e-20	2.07477e-19
TLR10	4p14	-0.391216	0.391216	1.54833e-20	2.09421e-19
EIF3G	19p13.2	0.391207	0.391207	1.55161e-20	2.09724e-19
GPR82	Xp11.4	-0.391181	0.391181	1.56131e-20	2.10893e-19
ITSN2	2p23.3	-0.39106	0.39106	1.60813e-20	2.17071e-19
RAPGEF5	7p15.3	-0.39103	0.39103	1.61959e-20	2.18471e-19
HSPG2	1p36.12	-0.391015	0.391015	1.62547e-20	2.19116e-19
BUD23	7q11.23	0.390998	0.390998	1.6324e-20	2.19903e-19
PUSL1	1p36.33	0.390979	0.390979	1.64003e-20	2.20782e-19
NANOS1	10q26.11	0.390809	0.390809	1.70872e-20	2.29875e-19
GAS5	1q25.1	0.390715	0.390715	1.74847e-20	2.35065e-19
TBC1D7	6p24.1	0.390649	0.390649	1.77643e-20	2.38662e-19
NME3	16p13.3	0.39062	0.39062	1.78881e-20	2.40165e-19
GMCL2	5q35.3	-0.390274	0.390274	1.94549e-20	2.61026e-19
PCNT	21q22.3	-0.390239	0.390239	1.96185e-20	2.63046e-19
SMARCC1	3p21.31	-0.390221	0.390221	1.97036e-20	2.6401e-19
CCDC88C	14q32.11-q32.12	-0.390183	0.390183	1.9887e-20	2.66289e-19
HEATR5A	14q12	-0.390102	0.390102	2.02794e-20	2.71363e-19
IL16	15q25.1	-0.390033	0.390033	2.06202e-20	2.75593e-19
PEX26	22q11.21	-0.390032	0.390032	2.06231e-20	2.75593e-19
DNTTIP1	20q13.12	0.390014	0.390014	2.07171e-20	2.76665e-19
EPB41L4A	5q22.1-q22.2	-0.389797	0.389797	2.18275e-20	2.91121e-19
RPL23AP82	22q13.33	0.389797	0.389797	2.18286e-20	2.91121e-19
PCMT1	6q25.1	0.389773	0.389773	2.19591e-20	2.92666e-19
NDUFC2	11q14.1	0.389763	0.389763	2.20113e-20	2.93167e-19
MADD	11p11.2	-0.389723	0.389723	2.22258e-20	2.95827e-19
IREB2	15q25.1	-0.389718	0.389718	2.22516e-20	2.95974e-19
MAGI1	3p14.1	-0.389645	0.389645	2.26471e-20	3.01035e-19
CCP110	16p12.3	-0.389607	0.389607	2.28519e-20	3.03556e-19
RRP7A	22q13.2	0.389592	0.389592	2.29362e-20	3.04475e-19
PSMB4	1q21.3	0.389577	0.389577	2.30186e-20	3.05366e-19
PAQR8	6p12.2	-0.389562	0.389562	2.3104e-20	3.06296e-19
TASOR	3p14.3	-0.38955	0.38955	2.31723e-20	3.06999e-19
FCHO2	5q13.2	-0.389424	0.389424	2.38878e-20	3.16269e-19
UBN2	7q34	-0.389408	0.389408	2.39789e-20	3.17265e-19
SELP	1q24.2	-0.389348	0.389348	2.43258e-20	3.21642e-19
TESPA1	12q13.2	-0.389333	0.389333	2.44175e-20	3.22643e-19
VCAM1	1p21.2	-0.38923	0.38923	2.5028e-20	3.30491e-19
CTDNEP1	17p13.1	0.389157	0.389157	2.54731e-20	3.36148e-19
PRKAR2B	7q22.3	-0.389034	0.389034	2.62426e-20	3.46074e-19
ETV6	12p13.2	-0.389026	0.389026	2.62943e-20	3.46529e-19
RHBDD1	2q36.3	-0.388932	0.388932	2.68919e-20	3.54171e-19
TMEM38A	19p13.11	-0.388869	0.388869	2.73065e-20	3.59396e-19
DEPDC5	22q12.2-q12.3	-0.388838	0.388838	2.75057e-20	3.61779e-19
LUC7L	16p13.3	0.388787	0.388787	2.78497e-20	3.66063e-19
PRPF31	19q13.42	0.388616	0.388616	2.90171e-20	3.81159e-19
PPP1R12A	12q21.2-q21.31	-0.388484	0.388484	2.99569e-20	3.93246e-19
WDFY3	4q21.23	-0.388458	0.388458	3.01428e-20	3.95427e-19
NUDCD2	5q34	0.388328	0.388328	3.10958e-20	4.07662e-19
CDC42SE2	5q31.1	-0.388322	0.388322	3.1145e-20	4.08041e-19
TANC1	2q24.2	-0.388298	0.388298	3.13249e-20	4.10129e-19
MIGA1	1p31.1	-0.388274	0.388274	3.15019e-20	4.12177e-19
CSNK1G1	15q22.31	-0.38821	0.38821	3.19931e-20	4.18331e-19
ROCK1	18q11.1	-0.388153	0.388153	3.24367e-20	4.23855e-19
RBMXL1	1p22.2	-0.388077	0.388077	3.30349e-20	4.3139e-19
ATP8B1	18q21.31	-0.388063	0.388063	3.31414e-20	4.325e-19
THOC7	3p14.1	0.387998	0.387998	3.36671e-20	4.39074e-19
TACO1	17q23.3	0.387797	0.387797	3.53303e-20	4.60466e-19
ADK	10q22.2	0.38776	0.38776	3.56419e-20	4.64225e-19
ADCY9	16p13.3	-0.387737	0.387737	3.58379e-20	4.66475e-19
SRA1	5q31.3	0.387649	0.387649	3.66065e-20	4.7617e-19
NSD3	8p11.23	-0.387615	0.387615	3.68994e-20	4.79669e-19
RBM15	1p13.3	-0.387474	0.387474	3.81736e-20	4.9591e-19
MGAT3	22q13.1	-0.38746	0.38746	3.82988e-20	4.97215e-19
EEF2KMT	16p13.3	0.387396	0.387396	3.88924e-20	5.04594e-19
C20ORF27	20p13	0.387383	0.387383	3.90144e-20	5.0585e-19
TRAF6	11p12	-0.387374	0.387374	3.90925e-20	5.06535e-19
PVT1	8q24.21	0.387185	0.387185	4.09048e-20	5.29675e-19
SPRYD7	13q14.2	0.387058	0.387058	4.21683e-20	5.45683e-19
TOGARAM1	14q21.2	-0.386841	0.386841	4.44127e-20	5.74356e-19
RALA	7p14.1	0.386822	0.386822	4.46156e-20	5.76608e-19
DRG1	22q12.2	0.386765	0.386765	4.52344e-20	5.84229e-19
RRP9	3p21.2	0.38675	0.38675	4.53961e-20	5.8594e-19
ATP5MC3	2q31.1	0.386583	0.386583	4.72399e-20	6.09346e-19
NR2F1	5q15	-0.386458	0.386458	4.86669e-20	6.27349e-19
BANK1	4q24	-0.386438	0.386438	4.89074e-20	6.30045e-19
RPL17	18q21.1	0.386344	0.386344	5.00142e-20	6.43889e-19
MARVELD2	5q13.2	-0.386264	0.386264	5.098e-20	6.55902e-19
NDUFV2	18p11.22	0.386183	0.386183	5.19709e-20	6.68221e-19
HUS1	7p12.3	0.386166	0.386166	5.21791e-20	6.70467e-19
GPR15	3q11.2	-0.386111	0.386111	5.28682e-20	6.78887e-19
TEAD1	11p15.3	-0.38607	0.38607	5.33887e-20	6.85132e-19
SRCAP	16p11.2	-0.386037	0.386037	5.38081e-20	6.90072e-19
IL17REL	22q13.33	-0.38599	0.38599	5.44194e-20	6.97466e-19
BHLHA15	7q21.3	-0.38598	0.38598	5.45545e-20	6.98333e-19
FNIP1	5q31.1	-0.38598	0.38598	5.45567e-20	6.98333e-19
ADD3	10q25.1-q25.2	-0.385966	0.385966	5.47325e-20	7.00136e-19
RPL10	Xq28	0.385947	0.385947	5.49796e-20	7.02849e-19
RBBP4	1p35.1	-0.385805	0.385805	5.68694e-20	7.26446e-19
ZNF516	18q23	-0.385803	0.385803	5.6898e-20	7.26446e-19
MS4A2	11q12.1	-0.38578	0.38578	5.7207e-20	7.29926e-19
PGAM1	10q24.1	0.385603	0.385603	5.96824e-20	7.61027e-19
METTL23	17q25.2	0.38555	0.38555	6.04363e-20	7.70149e-19
MED19	11q12.1	0.385533	0.385533	6.06848e-20	7.72826e-19
IPP	1p34.1	-0.385441	0.385441	6.2017e-20	7.8929e-19
FAH	15q25.1	0.38542	0.38542	6.23265e-20	7.92725e-19
RARS1	5q34	0.385391	0.385391	6.27634e-20	7.97775e-19
UGCG	9q31.3	-0.38538	0.38538	6.29311e-20	7.99401e-19
UBR2	6p21.1	-0.385375	0.385375	6.30006e-20	7.99777e-19
CIITA	16p13.13	-0.385323	0.385323	6.37932e-20	8.09326e-19
ZFAT	8q24.22	-0.385312	0.385312	6.39508e-20	8.10813e-19
ZNF800	7q31.33	-0.385297	0.385297	6.41874e-20	8.13297e-19
RBM47	4p14	-0.385285	0.385285	6.4364e-20	8.1502e-19
AMIGO1	1p13.3	-0.385216	0.385216	6.5436e-20	8.28072e-19
PLEK	2p14	-0.385192	0.385192	6.5804e-20	8.32203e-19
AVEN	15q14	0.385187	0.385187	6.58859e-20	8.32459e-19
CD151	11p15.5	0.385181	0.385181	6.59758e-20	8.32459e-19
PARM1	4q13.3	-0.385181	0.385181	6.59816e-20	8.32459e-19
ARL16	17q25.3	0.38518	0.38518	6.59904e-20	8.32459e-19
PUS7L	12q12	-0.385161	0.385161	6.62968e-20	8.35798e-19
ATP7A	Xq21.1	-0.384905	0.384905	7.04526e-20	8.87631e-19
C3ORF70	3q27.2	-0.384806	0.384806	7.21292e-20	9.08184e-19
USP1	1p31.3	-0.384561	0.384561	7.64457e-20	9.6193e-19
SLCO2B1	11q13.4	-0.384424	0.384424	7.89673e-20	9.93036e-19
P2RY1	3q25.2	-0.384408	0.384408	7.92743e-20	9.96272e-19
ARID4A	14q23.1	-0.384382	0.384382	7.97665e-20	1.00183e-18
RPL12	9q33.3	0.384289	0.384289	8.15334e-20	1.02323e-18
APPBP2	17q23.2	-0.384287	0.384287	8.15725e-20	1.02323e-18
MTFP1	22q12.2	0.384266	0.384266	8.19894e-20	1.02782e-18
SFXN4	10q26.11	0.384225	0.384225	8.27866e-20	1.03716e-18
TMEM9	1q32.1	0.384163	0.384163	8.40034e-20	1.05175e-18
LRRC8B	1p22.2	-0.384095	0.384095	8.53691e-20	1.06818e-18
MED7	5q33.3	0.384074	0.384074	8.57964e-20	1.07286e-18
ATP5MC2	12q13.13	0.384065	0.384065	8.59716e-20	1.07428e-18
LYRM4	6p25.1	0.384063	0.384063	8.60214e-20	1.07428e-18
UBE2I	16p13.3	0.384061	0.384061	8.60712e-20	1.07428e-18
ANAPC1	2q13	-0.384053	0.384053	8.62348e-20	1.07565e-18
ST20	15q25.1	0.383889	0.383889	8.96416e-20	1.11745e-18
OTUD7B	1q21.2	-0.383792	0.383792	9.17088e-20	1.14251e-18
FOXN3	14q31.3-q32.11	-0.383759	0.383759	9.24439e-20	1.15095e-18
TMEM186	16p13.2	0.383752	0.383752	9.26008e-20	1.15219e-18
ATP9B	18q23	-0.383723	0.383723	9.32294e-20	1.15929e-18
CHAMP1	13q34	-0.383696	0.383696	9.38322e-20	1.16607e-18
ARHGEF3	3p14.3	-0.383662	0.383662	9.45784e-20	1.17461e-18
GAPDH	12p13.31	0.383653	0.383653	9.47938e-20	1.17656e-18
AP1S1	7q22.1	0.383617	0.383617	9.5596e-20	1.18578e-18
CPED1	7q31.31	-0.383548	0.383548	9.71762e-20	1.20464e-18
B3GALT2	1q31.2	-0.38349	0.38349	9.85035e-20	1.22034e-18
TIRAP	11q24.2	-0.383439	0.383439	9.96995e-20	1.23439e-18
ZNF436	1p36.12	-0.383381	0.383381	1.01068e-19	1.25056e-18
ATAD2B	2p24.1-p23.3	-0.383344	0.383344	1.01962e-19	1.26085e-18
ATF2	2q31.1	-0.38329	0.38329	1.03275e-19	1.2763e-18
SNRK	3p22.1	-0.383223	0.383223	1.04925e-19	1.29588e-18
UBR3	2q31.1	-0.383196	0.383196	1.05598e-19	1.3034e-18
LENG1	19q13.42	0.383093	0.383093	1.08192e-19	1.33459e-18
SLAMF6	1q23.2-q23.3	-0.382976	0.382976	1.1121e-19	1.37098e-18
TMEM126A	11q14.1	0.382927	0.382927	1.1251e-19	1.38615e-18
LPIN2	18p11.31	-0.38291	0.38291	1.12968e-19	1.39094e-18
RBL2	16q12.2	-0.382789	0.382789	1.16237e-19	1.43031e-18
NOL12	22q13.1	0.382748	0.382748	1.17376e-19	1.44343e-18
DHX33	17p13.2	-0.382733	0.382733	1.17773e-19	1.44743e-18
ZNRF2P1	7p14.3	-0.382688	0.382688	1.19047e-19	1.46219e-18
MIA3	1q41	-0.382422	0.382422	1.26739e-19	1.55571e-18
RASGRP3	2p22.3	-0.382359	0.382359	1.28626e-19	1.57791e-18
AVPR1A	12q14.2	-0.382353	0.382353	1.28801e-19	1.57909e-18
RPP21	6p22.1	0.38232	0.38232	1.29824e-19	1.59066e-18
CYBB	Xp21.1-p11.4	-0.382314	0.382314	1.29999e-19	1.59184e-18
MAP3K13	3q27.2	-0.3822	0.3822	1.33538e-19	1.63417e-18
USP6NL	10p14	-0.382177	0.382177	1.34267e-19	1.64109e-18
NDUFA6	22q13.2	0.382177	0.382177	1.34267e-19	1.64109e-18
RANGRF	17p13.1	0.38216	0.38216	1.34799e-19	1.64658e-18
POLR2A	17p13.1	-0.382096	0.382096	1.36826e-19	1.67032e-18
PTAFR	1p35.3	-0.382057	0.382057	1.38094e-19	1.68478e-18
TGOLN2	2p11.2	-0.382046	0.382046	1.38462e-19	1.68824e-18
LIN37	19q13.12	0.381987	0.381987	1.40395e-19	1.71077e-18
RCE1	11q13.2	0.381973	0.381973	1.40844e-19	1.7152e-18
SAP130	2q14.3	-0.381969	0.381969	1.40984e-19	1.71586e-18
PIGL	17p11.2	0.381877	0.381877	1.44065e-19	1.75229e-18
INO80B	2p13.1	0.38187	0.38187	1.44293e-19	1.75401e-18
RAPH1	2q33.2	-0.381795	0.381795	1.46888e-19	1.78447e-18
WAPL	10q23.2	-0.381722	0.381722	1.49405e-19	1.81394e-18
OXLD1	17q25.3	0.381512	0.381512	1.56963e-19	1.90455e-18
SNHG9	16p13.3	0.381497	0.381497	1.57517e-19	1.91012e-18
IRAG2	12p12.1	-0.381254	0.381254	1.66771e-19	2.02111e-18
UTP11	1p34.3	0.381241	0.381241	1.67278e-19	2.02603e-18
SCIMP	17p13.2	-0.381191	0.381191	1.69233e-19	2.04847e-18
CEP192	18p11.21	-0.381015	0.381015	1.76389e-19	2.13381e-18
SLC16A6	17q24.2	-0.380868	0.380868	1.8256e-19	2.20713e-18
GAPT	5q11.2	-0.380819	0.380819	1.84661e-19	2.23119e-18
NUP37	12q23.2	0.380783	0.380783	1.86211e-19	2.24855e-18
BRI3	7q21.3	0.380746	0.380746	1.87832e-19	2.26677e-18
APBB1IP	10p12.1	-0.380712	0.380712	1.89345e-19	2.28364e-18
UBE2M	19q13.43	0.380702	0.380702	1.89768e-19	2.28737e-18
WIPI2	7p22.1	0.380611	0.380611	1.93873e-19	2.33545e-18
SELENOH	11q12.1	0.380572	0.380572	1.95661e-19	2.35557e-18
DAGLA	11q12.2	-0.380541	0.380541	1.97068e-19	2.37109e-18
PTMS	12p13.31	0.380509	0.380509	1.98552e-19	2.3875e-18
WASHC2A	10q11.23	-0.380493	0.380493	1.99316e-19	2.39526e-18
BRWD1	21q22.2	-0.380339	0.380339	2.06621e-19	2.48155e-18
MAN2A1	5q21.3	-0.380317	0.380317	2.07654e-19	2.49247e-18
CCNI	4q21.1	-0.380287	0.380287	2.09134e-19	2.50873e-18
SLC25A3	12q23.1	0.380126	0.380126	2.1715e-19	2.60334e-18
METTL22	16p13.2	0.380038	0.380038	2.21647e-19	2.65565e-18
NUGGC	8p21.1	-0.38001	0.38001	2.23119e-19	2.6717e-18
MIB1	18q11.2	-0.379887	0.379887	2.29592e-19	2.74757e-18
UBE2L3	22q11.21	0.379804	0.379804	2.34107e-19	2.79993e-18
NOC2L	1p36.33	0.379701	0.379701	2.39783e-19	2.86439e-18
PTPN13	4q21.3	-0.379701	0.379701	2.39783e-19	2.86439e-18
RSL24D1	15q21.3	0.379669	0.379669	2.41626e-19	2.88468e-18
BNIP3	10q26.3	0.379568	0.379568	2.47379e-19	2.95161e-18
TMEM177	2q14.2	0.379564	0.379564	2.4758e-19	2.95226e-18
JAK1	1p31.3	-0.379519	0.379519	2.50222e-19	2.98199e-18
NDUFA11	19p13.3	0.379513	0.379513	2.50554e-19	2.98416e-18
ATP6V1F	7q32.1	0.379439	0.379439	2.54886e-19	3.03396e-18
ZCCHC17	1p35.2	0.379411	0.379411	2.56565e-19	3.05213e-18
PRDX4	Xp22.11	0.379366	0.379366	2.59298e-19	3.08282e-18
ITPR1	3p26.1	-0.379351	0.379351	2.60202e-19	3.09173e-18
RPL10A	6p21.31	0.379301	0.379301	2.63211e-19	3.12563e-18
LIMS1	2q12.3	-0.379251	0.379251	2.66333e-19	3.16083e-18
LIMD1	3p21.31	-0.379247	0.379247	2.66547e-19	3.1615e-18
RFX1	19p13.12	-0.379228	0.379228	2.67781e-19	3.17426e-18
HOOK3	8p11.21	-0.379208	0.379208	2.6902e-19	3.18706e-18
OSBPL8	12q21.2	-0.3792	0.3792	2.69518e-19	3.19107e-18
RPL4	15q22.31	0.379188	0.379188	2.70255e-19	3.19791e-18
RAB5IF	20q11.23	0.379141	0.379141	2.73244e-19	3.22959e-18
INO80E	16p11.2	0.379141	0.379141	2.73255e-19	3.22959e-18
BAX	19q13.33	0.379119	0.379119	2.74632e-19	3.24396e-18
TTF2	1p13.1	-0.379066	0.379066	2.7804e-19	3.28228e-18
HEG1	3q21.2	-0.379061	0.379061	2.78363e-19	3.28415e-18
KIAA0586	14q23.1	-0.378984	0.378984	2.83392e-19	3.34153e-18
FAM53B	10q26.13	-0.378974	0.378974	2.84038e-19	3.34718e-18
CCR5	3p21.31	-0.378903	0.378903	2.88777e-19	3.40102e-18
ATP2B4	1q32.1	-0.378789	0.378789	2.9657e-19	3.49075e-18
TXNDC9	2q11.2	0.378668	0.378668	3.05036e-19	3.58829e-18
FGL2	7q11.23	-0.37862	0.37862	3.08416e-19	3.62593e-18
NDUFAF5	20p12.1	0.378536	0.378536	3.14522e-19	3.69554e-18
TENT5C	1p12	-0.378509	0.378509	3.16526e-19	3.71691e-18
MKI67	10q26.2	-0.378369	0.378369	3.2694e-19	3.83695e-18
RFX3	9p24.2	-0.378344	0.378344	3.2886e-19	3.85722e-18
PDRG1	20q11.21	0.378295	0.378295	3.3265e-19	3.8994e-18
SNX30	9q32	-0.378281	0.378281	3.33727e-19	3.90973e-18
TMEM184C	4q31.23	-0.378274	0.378274	3.3425e-19	3.91358e-18
THRAP3	1p34.3	-0.378006	0.378006	3.55717e-19	4.1625e-18
KLHL15	Xp22.11	-0.377994	0.377994	3.56713e-19	4.17171e-18
MRPL1	4q21.1	0.377985	0.377985	3.57427e-19	4.17762e-18
MBLAC2	5q14.3	-0.377921	0.377921	3.62745e-19	4.23731e-18
CILK1	6p12.1	-0.377902	0.377902	3.64365e-19	4.25376e-18
CCDC59	12q21.31	0.377842	0.377842	3.69511e-19	4.31132e-18
CASP2	7q34	-0.377813	0.377813	3.71976e-19	4.33755e-18
BIN2	12q13.13	-0.377723	0.377723	3.79787e-19	4.42606e-18
ZNF317	19p13.2	-0.377697	0.377697	3.82132e-19	4.45081e-18
GPS1	17q25.3	0.377601	0.377601	3.90672e-19	4.54763e-18
TLR5	1q41	-0.377563	0.377563	3.94163e-19	4.58561e-18
CHD9	16q12.2	-0.377479	0.377479	4.01919e-19	4.67313e-18
ALPK1	4q25	-0.377465	0.377465	4.03177e-19	4.68503e-18
ALOX5	10q11.21	-0.377375	0.377375	4.11689e-19	4.78117e-18
AAK1	2p13.3	-0.377332	0.377332	4.15816e-19	4.82631e-18
PROSER1	13q13.3	-0.377199	0.377199	4.28745e-19	4.97237e-18
CXCR3	Xq13.1	-0.377198	0.377198	4.28896e-19	4.97237e-18
MON2	12q14.1	-0.376908	0.376908	4.58583e-19	5.31347e-18
CENPC	4q13.2	-0.376895	0.376895	4.60024e-19	5.32708e-18
MCM9	6q22.31	-0.376844	0.376844	4.65454e-19	5.38685e-18
KITLG	12q21.32	-0.376814	0.376814	4.68666e-19	5.4209e-18
USP8	15q21.2	-0.376811	0.376811	4.69004e-19	5.42168e-18
TLR4	9q33.1	-0.376767	0.376767	4.73799e-19	5.47394e-18
ARL5B	10p12.31	-0.376697	0.376697	4.81474e-19	5.55942e-18
KDM4A	1p34.2-p34.1	-0.376694	0.376694	4.81896e-19	5.56109e-18
GRAP2	22q13.1	-0.376519	0.376519	5.01714e-19	5.78645e-18
SEMA4D	9q22.2	-0.376466	0.376466	5.07837e-19	5.8537e-18
RPL32	3p25.2	0.376364	0.376364	5.19955e-19	5.98994e-18
CBLL1	7q22.3	-0.376326	0.376326	5.24547e-19	6.03937e-18
EHMT1	9q34.3	-0.376288	0.376288	5.29169e-19	6.08909e-18
MSS51	10q22.2	0.376277	0.376277	5.3054e-19	6.10136e-18
MRPL15	8q11.23	0.376269	0.376269	5.315e-19	6.1089e-18
MTRES1	6q21	0.37626	0.37626	5.32628e-19	6.11835e-18
CEBPB	20q13.13	0.376238	0.376238	5.35338e-19	6.14328e-18
HIKESHI	11q14.2	0.376237	0.376237	5.35411e-19	6.14328e-18
DDX6	11q23.3	-0.376228	0.376228	5.36495e-19	6.1522e-18
IRF8	16q24.1	-0.376114	0.376114	5.50816e-19	6.31281e-18
CRACD	4q12	-0.376091	0.376091	5.53735e-19	6.34263e-18
ATP5MGL	22q13.2	0.376031	0.376031	5.614e-19	6.42676e-18
AQR	15q14	-0.375988	0.375988	5.67102e-19	6.48833e-18
LHB	19q13.33	0.37592	0.37592	5.75926e-19	6.58554e-18
CRLS1	20p12.3	0.375849	0.375849	5.85488e-19	6.69105e-18
XPO7	8p21.3	-0.37577	0.37577	5.96273e-19	6.81042e-18
ATP6V1D	14q23.3	0.375763	0.375763	5.97234e-19	6.81752e-18
C4ORF48	4p16.3	0.375747	0.375747	5.99452e-19	6.83894e-18
B3GAT3	11q12.3	0.375717	0.375717	6.03563e-19	6.88192e-18
RGS20	8q11.23	0.375712	0.375712	6.04243e-19	6.88576e-18
UBE2J2	1p36.33	0.375702	0.375702	6.05652e-19	6.89789e-18
ABHD16B	20q13.33	0.375631	0.375631	6.15606e-19	7.00729e-18
PDS5B	13q13.1	-0.375608	0.375608	6.18804e-19	7.03969e-18
LRRC58	3q13.33	-0.37528	0.37528	6.67291e-19	7.58698e-18
CBX7	22q13.1	-0.375149	0.375149	6.87677e-19	7.81433e-18
NBPF1	1p36.13	-0.375144	0.375144	6.88477e-19	7.81899e-18
FGD2	6p21.2	-0.37499	0.37499	7.13357e-19	8.09696e-18
CCR6	6q27	-0.374933	0.374933	7.22614e-19	8.1974e-18
LCP2	5q35.1	-0.374679	0.374679	7.65936e-19	8.68393e-18
TSFM	12q14.1	0.374665	0.374665	7.68503e-19	8.70656e-18
NME1-NME2	17q21.33	0.374663	0.374663	7.688e-19	8.70656e-18
FSTL3	19p13.3	0.374613	0.374613	7.77773e-19	8.80319e-18
PRELID1P6	2p15	0.374586	0.374586	7.82479e-19	8.85146e-18
MSH3	5q14.1	-0.374573	0.374573	7.84828e-19	8.87302e-18
ALKBH3	11p11.2	0.374538	0.374538	7.91089e-19	8.93877e-18
BTLA	3q13.2	-0.374488	0.374488	8.00342e-19	9.03823e-18
SNRNP70	19q13.33	0.374479	0.374479	8.0202e-19	9.05208e-18
B4GALT7	5q35.3	0.374467	0.374467	8.04085e-19	9.07028e-18
AGO1	1p34.3	-0.374406	0.374406	8.15382e-19	9.19254e-18
BRD4	19p13.12	-0.374356	0.374356	8.24906e-19	9.29468e-18
CREB1	2q33.3	-0.374331	0.374331	8.29604e-19	9.34237e-18
COPE	19p13.11	0.374321	0.374321	8.31498e-19	9.35517e-18
HSD17B10	Xp11.22	0.37432	0.37432	8.31674e-19	9.35517e-18
CSTF2T	10q21.1	-0.374295	0.374295	8.36459e-19	9.40372e-18
IAH1	2p25.1	0.374271	0.374271	8.41109e-19	9.45069e-18
CLK3	15q24.1	0.374228	0.374228	8.49303e-19	9.53741e-18
SMAD5	5q31.1	-0.37417	0.37417	8.60678e-19	9.65973e-18
GPR75	2p16.2	-0.374115	0.374115	8.71542e-19	9.77619e-18
FBXL6	8q24.3	0.374055	0.374055	8.83589e-19	9.90578e-18
COPS5	8q13.1	0.37401	0.37401	8.92896e-19	1.00045e-17
NOC4L	12q24.33	0.373935	0.373935	9.08221e-19	1.01706e-17
HMBOX1	8p21.1-p12	-0.373772	0.373772	9.42858e-19	1.05525e-17
DTX3L	3q21.1	-0.373767	0.373767	9.43809e-19	1.05573e-17
ATRAID	2p23.3	0.373709	0.373709	9.5641e-19	1.06923e-17
PIGY	4q22.1	0.373636	0.373636	9.72583e-19	1.0867e-17
SMC5	9q21.12	-0.373583	0.373583	9.84367e-19	1.09926e-17
SMIM4	3p21.1	0.373482	0.373482	1.00723e-18	1.12404e-17
AHDC1	1p36.11-p35.3	-0.37348	0.37348	1.00768e-18	1.12404e-17
SNHG10	14q32.13	0.373406	0.373406	1.02496e-18	1.14268e-17
TLR8	Xp22.2	-0.373386	0.373386	1.02963e-18	1.14724e-17
GON4L	1q22	-0.373292	0.373292	1.05203e-18	1.17155e-17
ZDBF2	2q33.3	-0.373245	0.373245	1.06333e-18	1.18348e-17
TACR1	2p12	-0.37317	0.37317	1.08161e-18	1.20315e-17
RRP8	11p15.4	0.373067	0.373067	1.10745e-18	1.23121e-17
NIT2	3q12.2	0.373046	0.373046	1.11263e-18	1.23629e-17
IL21	4q27	-0.373033	0.373033	1.116e-18	1.23935e-17
SOGA1	20q11.23	-0.373019	0.373019	1.11944e-18	1.24248e-17
NGDN	14q11.2	0.372966	0.372966	1.13325e-18	1.25712e-17
KREMEN1	22q12.1	-0.372882	0.372882	1.15516e-18	1.28071e-17
H6PD	1p36.22	-0.372861	0.372861	1.16066e-18	1.28609e-17
MECOM	3q26.2	-0.37285	0.37285	1.16347e-18	1.2885e-17
RBM4	11q13.2	0.372727	0.372727	1.19662e-18	1.32447e-17
IRF3	19q13.33	0.372703	0.372703	1.20319e-18	1.33101e-17
WDR46	6p21.32	0.372673	0.372673	1.21142e-18	1.33938e-17
LCOR	10q24.1	-0.372644	0.372644	1.21947e-18	1.34754e-17
CDK19	6q21	-0.372537	0.372537	1.24943e-18	1.37988e-17
TMPO	12q23.1	-0.372518	0.372518	1.25487e-18	1.38512e-17
MRPL9	1q21.3	0.372504	0.372504	1.25875e-18	1.38799e-17
SMAD4	18q21.2	-0.372504	0.372504	1.25885e-18	1.38799e-17
ASPM	1q31.3	-0.372469	0.372469	1.26904e-18	1.39845e-17
ZNF776	19q13.43	-0.372422	0.372422	1.28267e-18	1.4127e-17
ADAMTSL3	15q25.2	-0.372398	0.372398	1.28953e-18	1.41947e-17
SLC26A6	3p21.31	0.372327	0.372327	1.31067e-18	1.44195e-17
NTPCR	1q42.2	0.372256	0.372256	1.33195e-18	1.46456e-17
RPLP0	12q24.23	0.3721	0.3721	1.38007e-18	1.51664e-17
CHRDL1	Xq23	-0.372041	0.372041	1.39868e-18	1.53625e-17
RPL29	3p21.2	0.372025	0.372025	1.40363e-18	1.54084e-17
MOSPD2	Xp22.2	-0.371982	0.371982	1.41757e-18	1.5553e-17
BRPF1	3p25.3	-0.371971	0.371971	1.42086e-18	1.55805e-17
MRPS12	19q13.2	0.371902	0.371902	1.44353e-18	1.58204e-17
RGS18	1q31.2	-0.371796	0.371796	1.4787e-18	1.6197e-17
EEF1G	11q12.3	0.371755	0.371755	1.49255e-18	1.63398e-17
DNAJC30	7q11.23	0.371682	0.371682	1.51733e-18	1.6602e-17
MAPK8	10q11.22	-0.371636	0.371636	1.53318e-18	1.67663e-17
ENPP2	8q24.12	-0.371628	0.371628	1.53606e-18	1.67886e-17
SLAMF1	1q23.3	-0.371615	0.371615	1.5404e-18	1.68268e-17
PPIAL4D	1q21.1	0.371525	0.371525	1.57217e-18	1.71645e-17
AREG	4q13.3	0.371415	0.371415	1.61204e-18	1.75903e-17
CACNA1D	3p21.1	-0.371402	0.371402	1.61678e-18	1.76324e-17
SYNPO2	4q26	-0.371379	0.371379	1.62539e-18	1.77166e-17
ATF7IP	12p13.1	-0.371351	0.371351	1.63545e-18	1.78167e-17
ZSCAN25	7q22.1	-0.371325	0.371325	1.64518e-18	1.79128e-17
PRKDC	8q11.21	-0.37132	0.37132	1.64728e-18	1.79261e-17
ASAH1	8p22	-0.371305	0.371305	1.65255e-18	1.79736e-17
ZNHIT3	17q12	0.371264	0.371264	1.6681e-18	1.81329e-17
KIAA0100	17q11.2	-0.371199	0.371199	1.69273e-18	1.83907e-17
STAG2	Xq25	-0.371124	0.371124	1.72173e-18	1.86956e-17
ZNF543	19q13.43	-0.37106	0.37106	1.74687e-18	1.89583e-17
GEMIN2	14q21.1	0.371026	0.371026	1.76037e-18	1.90945e-17
RPSAP52	12q14.3	0.371023	0.371023	1.76189e-18	1.91006e-17
CHCHD7	8q12.1	0.370987	0.370987	1.7761e-18	1.92443e-17
SCAND1	20q11.23	0.370962	0.370962	1.78627e-18	1.93441e-17
MAP3K5	6q23.3	-0.370947	0.370947	1.79218e-18	1.93976e-17
SMIM29	6p21.31	0.370828	0.370828	1.84107e-18	1.9916e-17
PPTC7	12q24.11	-0.370813	0.370813	1.84748e-18	1.99745e-17
RABGAP1L	1q25.1	-0.370742	0.370742	1.87718e-18	2.02847e-17
VPS72	1q21.3	0.370693	0.370693	1.89814e-18	2.05001e-17
POLDIP2	17q11.2	0.370653	0.370653	1.91542e-18	2.06756e-17
SSTR3	22q13.1	-0.370569	0.370569	1.95205e-18	2.10597e-17
LRCH3	3q29	-0.370554	0.370554	1.95893e-18	2.11225e-17
CCDC170	6q25.1	-0.370298	0.370298	2.07559e-18	2.23684e-17
PRKCZ	1p36.33	0.370291	0.370291	2.07866e-18	2.23894e-17
FGD5	3p25.1	-0.370253	0.370253	2.09643e-18	2.25687e-17
LRRK2	12q12	-0.370241	0.370241	2.10251e-18	2.2622e-17
ADAMDEC1	8p21.2	-0.370195	0.370195	2.12422e-18	2.28434e-17
POP7	7q22.1	0.370189	0.370189	2.12728e-18	2.28639e-17
NPC2	14q24.3	0.370066	0.370066	2.18715e-18	2.34949e-17
IL10RA	11q23.3	-0.370058	0.370058	2.19102e-18	2.35239e-17
SETD5	3p25.3	-0.370006	0.370006	2.2169e-18	2.3789e-17
C12ORF73	12q23.3	0.369908	0.369908	2.26633e-18	2.43064e-17
ZBTB44	11q24.3	-0.369799	0.369799	2.32258e-18	2.48963e-17
HLF	17q22	-0.369765	0.369765	2.3404e-18	2.50739e-17
WIPF1	2q31.1	-0.36965	0.36965	2.40197e-18	2.57198e-17
PIK3CA	3q26.32	-0.369631	0.369631	2.41244e-18	2.58182e-17
PAPOLG	2p16.1	-0.369627	0.369627	2.41469e-18	2.58284e-17
SLX4	16p13.3	-0.369501	0.369501	2.48376e-18	2.65531e-17
USP25	21q21.1	-0.369491	0.369491	2.48965e-18	2.66018e-17
FAHD1	16p13.3	0.369439	0.369439	2.51919e-18	2.69031e-17
ADAT1	16q23.1	-0.369385	0.369385	2.54994e-18	2.7217e-17
COMTD1	10q22.2	0.369325	0.369325	2.58445e-18	2.75707e-17
YLPM1	14q24.3	-0.369283	0.369283	2.60875e-18	2.78151e-17
CHRNA6	8p11.21	-0.369278	0.369278	2.61187e-18	2.78335e-17
DRG2	17p11.2	0.369222	0.369222	2.64505e-18	2.8155e-17
GRHL2	8q22.3	-0.36922	0.36922	2.6461e-18	2.8155e-17
PROB1	5q31.2	-0.36922	0.36922	2.64625e-18	2.8155e-17
DICER1	14q32.13	-0.369184	0.369184	2.66778e-18	2.8369e-17
INPP5D	2q37.1	-0.369168	0.369168	2.67731e-18	2.84553e-17
COX19	7p22.3	0.369092	0.369092	2.72363e-18	2.89322e-17
MIS18BP1	14q21.2	-0.369084	0.369084	2.72849e-18	2.89685e-17
GPD1L	3p22.3	-0.369073	0.369073	2.73501e-18	2.90224e-17
DPM3	1q22	0.368877	0.368877	2.8585e-18	3.03167e-17
DIP2A	21q22.3	-0.368855	0.368855	2.8724e-18	3.04481e-17
ZFP3	17p13.2	-0.368833	0.368833	2.88643e-18	3.05806e-17
ZNF792	19q13.11	-0.368745	0.368745	2.9441e-18	3.11751e-17
AHCYL1	1p13.3	-0.368732	0.368732	2.95287e-18	3.12514e-17
SLC30A4	15q21.1	-0.368728	0.368728	2.95572e-18	3.12651e-17
FAM207A	21q22.3	0.368628	0.368628	3.02258e-18	3.19555e-17
PIGH	14q24.1	0.368625	0.368625	3.02505e-18	3.19647e-17
ACOT7	1p36.31	0.36861	0.36861	3.03491e-18	3.2052e-17
KATNIP	16p12.1	-0.368584	0.368584	3.05272e-18	3.22232e-17
SLC52A2	8q24.3	0.368582	0.368582	3.0544e-18	3.22239e-17
PDCL3	2q11.2	0.368551	0.368551	3.07535e-18	3.24279e-17
ADRM1	20q13.33	0.368495	0.368495	3.11443e-18	3.28227e-17
ZNF45	19q13.31	-0.368468	0.368468	3.13349e-18	3.30062e-17
CCDC97	19q13.2	-0.368373	0.368373	3.20077e-18	3.36972e-17
HNRNPCL3	1p36.21	0.368282	0.368282	3.26634e-18	3.43694e-17
ZZZ3	1p31.1	-0.368192	0.368192	3.33299e-18	3.50523e-17
GALNT4	12q21.33	-0.368095	0.368095	3.40638e-18	3.58054e-17
ADCK5	8q24.3	0.368084	0.368084	3.41476e-18	3.58747e-17
ERP44	9q31.1	0.368039	0.368039	3.44986e-18	3.62197e-17
SIGLEC8	19q13.33-q13.41	-0.368037	0.368037	3.45122e-18	3.62197e-17
CENPF	1q41	-0.367908	0.367908	3.55185e-18	3.72563e-17
SLC4A3	2q35	0.367897	0.367897	3.56125e-18	3.73265e-17
RPS5	19q13.43	0.367895	0.367895	3.56226e-18	3.73265e-17
MOB2	11p15.5	0.367785	0.367785	3.65108e-18	3.82371e-17
ITM2A	Xq21.1	-0.367764	0.367764	3.66863e-18	3.84009e-17
S1PR1	1p21.2	-0.367702	0.367702	3.71961e-18	3.89142e-17
RPS14	5q33.1	0.367666	0.367666	3.74971e-18	3.92086e-17
PDE5A	4q26	-0.36766	0.36766	3.75453e-18	3.92385e-17
CTTNBP2NL	1p13.2	-0.367657	0.367657	3.75786e-18	3.92529e-17
HSP90B1	12q23.3	0.367585	0.367585	3.81877e-18	3.98683e-17
IGSF10	3q25.1	-0.36758	0.36758	3.82255e-18	3.9887e-17
ABI3BP	3q12.2	-0.367527	0.367527	3.86796e-18	4.03399e-17
USE1	19p13.11	0.367385	0.367385	3.99351e-18	4.16276e-17
OTULINL	5p15.2	-0.367362	0.367362	4.01374e-18	4.18167e-17
SPECC1L	22q11.23	-0.367298	0.367298	4.07173e-18	4.23989e-17
NTAQ1	8q24.13	0.367275	0.367275	4.09223e-18	4.25902e-17
PPP1R15B	1q32.1	-0.367245	0.367245	4.12014e-18	4.28584e-17
INHA	2q35	0.3672	0.3672	4.16162e-18	4.32674e-17
SLC35A5	3q13.2	-0.367168	0.367168	4.19108e-18	4.35512e-17
TMEM81	1q32.1	0.367086	0.367086	4.26886e-18	4.43364e-17
BICC1	10q21.1	-0.367083	0.367083	4.27158e-18	4.43416e-17
PSD3	8p22	-0.367076	0.367076	4.27884e-18	4.43941e-17
SIL1	5q31.2	0.367002	0.367002	4.34985e-18	4.51075e-17
CCDC107	9p13.3	0.366955	0.366955	4.39555e-18	4.55578e-17
UBASH3A	21q22.3	-0.366912	0.366912	4.4375e-18	4.59688e-17
CXADR	21q21.1	-0.366894	0.366894	4.45587e-18	4.61352e-17
ZNF692	1q44	0.366783	0.366783	4.56717e-18	4.72633e-17
NOSIP	19q13.33	0.366715	0.366715	4.63713e-18	4.79625e-17
P2RX7	12q24.31	-0.36671	0.36671	4.64233e-18	4.79915e-17
TMEM91	19q13.2	0.366701	0.366701	4.65225e-18	4.80692e-17
EIF3IP1	7q31.1	0.366673	0.366673	4.68093e-18	4.83406e-17
BTAF1	10q23.32	-0.366668	0.366668	4.6857e-18	4.8365e-17
GIMAP8	7q36.1	-0.366631	0.366631	4.72482e-18	4.87437e-17
ZNF490	19p13.2-p13.13	-0.36652	0.36652	4.84337e-18	4.9941e-17
POP4	19q12	0.366502	0.366502	4.86225e-18	5.011e-17
AATF	17q12	0.366497	0.366497	4.86782e-18	5.01416e-17
RAE1	20q13.31	0.366462	0.366462	4.90604e-18	5.05093e-17
KIF24	9p13.3	-0.366383	0.366383	4.99338e-18	5.13821e-17
PRR13	12q13.13	0.366368	0.366368	5.00992e-18	5.15259e-17
EID2	19q13.2	0.366282	0.366282	5.10666e-18	5.24938e-17
MTMR3	22q12.2	-0.366263	0.366263	5.12886e-18	5.2695e-17
PHLPP1	18q21.33	-0.366227	0.366227	5.16981e-18	5.30885e-17
FRA10AC1	10q23.33	0.366162	0.366162	5.2452e-18	5.38351e-17
LYSMD4	15q26.3	0.36608	0.36608	5.34224e-18	5.4803e-17
DBT	1p21.2	-0.365996	0.365996	5.44212e-18	5.57991e-17
MZT2A	2q21.1	0.365971	0.365971	5.47264e-18	5.60747e-17
F8	Xq28	-0.36597	0.36597	5.47459e-18	5.60747e-17
CBWD2	2q14.1	0.365964	0.365964	5.48137e-18	5.61155e-17
STX4	16p11.2	0.365884	0.365884	5.58004e-18	5.70964e-17
ERMARD	6q27	0.365881	0.365881	5.5836e-18	5.71037e-17
PIK3R3	1p34.1	-0.365814	0.365814	5.66779e-18	5.79352e-17
QKI	6q26	-0.365732	0.365732	5.77106e-18	5.89607e-17
TXNRD2	22q11.21	0.365729	0.365729	5.7755e-18	5.8976e-17
RNF44	5q35.2	-0.365694	0.365694	5.81984e-18	5.93985e-17
ZMYND11	10p15.3	-0.365676	0.365676	5.84323e-18	5.95955e-17
CD4	12p13.31	-0.365675	0.365675	5.84509e-18	5.95955e-17
MKKS	20p12.2	0.36564	0.36564	5.89084e-18	6.00315e-17
GP1BA	17p13.2	-0.365607	0.365607	5.93435e-18	6.04441e-17
ZNF706	8q22.3	0.365562	0.365562	5.99384e-18	6.1019e-17
RWDD3	1p21.3	0.365547	0.365547	6.01307e-18	6.11837e-17
KARS1	16q23.1	0.36545	0.36545	6.14481e-18	6.24924e-17
KCTD3	1q41	-0.365448	0.365448	6.14792e-18	6.24924e-17
GAPVD1	9q33.3	-0.365445	0.365445	6.15114e-18	6.24935e-17
ZBTB38	3q23	-0.365434	0.365434	6.16579e-18	6.26106e-17
SLC2A4RG	20q13.33	0.365381	0.365381	6.23873e-18	6.33191e-17
TIMM50	19q13.2	0.365363	0.365363	6.26429e-18	6.35464e-17
IQGAP2	5q13.3	-0.365351	0.365351	6.28045e-18	6.36781e-17
MTMR1	Xq28	-0.36527	0.36527	6.39433e-18	6.48e-17
ADCY5	3q21.1	-0.365262	0.365262	6.4066e-18	6.48916e-17
MBP	18q23	-0.36523	0.36523	6.45143e-18	6.53126e-17
IMP4	2q21.1	0.365204	0.365204	6.48908e-18	6.56606e-17
CCSER2	10q23.1	-0.365096	0.365096	6.64673e-18	6.72218e-17
GCSAML	1q44	-0.365077	0.365077	6.67484e-18	6.74721e-17
MRPL23	11p15.5	0.364977	0.364977	6.82369e-18	6.89419e-17
GNL3L	Xp11.22	-0.364933	0.364933	6.89048e-18	6.95817e-17
DENR	12q24.31	0.364905	0.364905	6.93454e-18	6.99914e-17
RPL14	3p22.1	0.364894	0.364894	6.95154e-18	7.01277e-17
GNG5	1p22.3	0.364872	0.364872	6.98528e-18	7.04326e-17
PALM2AKAP2	9q31.3	-0.364843	0.364843	7.02947e-18	7.08425e-17
RPF1	1p22.3	0.364779	0.364779	7.13102e-18	7.18298e-17
MSRB2	10p12.2	0.364675	0.364675	7.29696e-18	7.34644e-17
SLIT2	4p15.31	-0.3646	0.3646	7.41867e-18	7.46523e-17
TARDBPP3	2q37.3	0.364542	0.364542	7.51385e-18	7.5572e-17
CCDC85B	11q13.1	0.364447	0.364447	7.6746e-18	7.71501e-17
CNTRL	9q33.2	-0.364413	0.364413	7.73253e-18	7.76936e-17
NDUFA3	19q13.42	0.364394	0.364394	7.7642e-18	7.79726e-17
FOSL2	2p23.2	-0.364266	0.364266	7.98795e-18	8.01693e-17
LMBRD2	5p13.2	-0.364264	0.364264	7.99093e-18	8.01693e-17
ZNF718	4p16.3	-0.364259	0.364259	7.99962e-18	8.02163e-17
[truncated: 18,046 more rows]
