# Supplementary material for: Increased response to TPF chemotherapy promotes immune escape in hypopharyngeal squamous cell carcinoma
Source: Front Pharmacol. 2023 Jan 13;13:1097197. doi: 10.3389/fphar.2022.1097197 (PMC9880322; doi:10.3389/fphar.2022.1097197)
Supplement: Supplementary file 11 [file DataSheet2.XLSX]

## Sheet: mRNA
GeneID	GeneName	sum	Mean_0	Mean_1	FC_OTO_1vs0	pvalue	oto-17-14556	oto-P19-549	oto-P18-5552	oto-18-10370	oto-17-10080	oto-17-07428	oto-17-05956	oto-17-02269	oto-17-01737	oto-17-01081	oto-16-15962	oto-16-14067	oto-16-11883	oto-16-04667	oto-16-01554	oto-18-12270	oto-18-09469	oto-18-09059	oto-18-08324	oto-17-17317	oto-17-11438	oto-17-11273	oto-17-01447	oto-17-01193	oto-16-12366	oto-16-05567	oto-14-1887	oto-14-1880
ENSG00000187555.14	USP7	931.532	37.4349	28.6776	0.766066	8.21e-06	36.2511	36.6504	33.2186	38.4672	35.1348	34.082	38.0523	40.4474	39.5687	37.7856	38.3018	31.8142	47.9071	33.3521	38.9899	33.7641	26.339	31.2908	28.5427	23.1554	25.6583	24.6518	31.0928	30.4083	26.8556	33.3371	35.5206	20.8923
ENSG00000186665.9	C17orf58	83.2709	2.40454	3.84637	1.59963	0.000249077	2.19218	1.65005	1.35581	3.59596	3.0019	1.27954	2.77263	2.22137	2.89593	2.90937	1.04253	1.74517	2.22373	2.55945	3.12244	2.45095	3.17315	4.30859	3.93954	4.59909	4.31101	4.14901	3.16415	2.26504	4.42697	2.69091	4.82802	4.39646
ENSG00000177479.19	ARIH2	290.689	8.89517	12.3124	1.38417	6.07e-05	8.08036	6.58038	6.42289	10.5397	8.90676	8.9866	7.82157	11.233	7.86957	9.75215	10.0408	9.9373	8.07008	7.42145	10.2651	9.36714	9.13776	10.9102	13.2129	18.7683	14.6703	11.5129	13.2161	11.9016	11.8298	11.6794	12.1118	10.4433
ENSG00000157837.15	SPPL3	418.37	17.4915	12.2152	0.698351	0.000133219	19.6285	15.2768	17.8076	14.9299	18.2484	17.3565	14.3525	14.4069	23.5533	18.54	22.7892	13.6228	18.579	13.963	17.8183	11.6022	6.86905	9.78999	11.6912	13.9635	17.0295	13.7191	11.446	12.9577	12.4065	7.70876	18.021	10.2931
ENSG00000010318.20	PHF7	73.6544	2.13384	3.41898	1.60227	0.000129043	2.23597	1.90808	0.964808	2.91808	2.54798	1.65552	1.63618	2.52921	1.88905	1.98916	1.57948	1.83015	1.8085	1.82134	3.19408	2.21979	2.21584	3.90224	3.03704	3.74881	5.64748	2.9752	3.73444	2.1741	2.96498	2.82881	4.52885	3.1692
ENSG00000130958.12	SLC35D2	48.1826	1.49358	2.19838	1.47188	0.000275907	1.59996	1.54838	1.37152	1.61812	1.35755	1.45539	0.824956	1.72318	1.45939	1.67732	1.57788	1.49399	0.766545	1.05608	1.37346	1.98242	2.65296	2.10731	1.60879	1.3601	2.51303	2.07645	3.37955	1.44993	2.11782	1.4921	2.28814	2.2503
ENSG00000164687.10	FABP5	7466.25	377.191	139.321	0.369365	0.0364929	106.128	73.1651	921.985	517.804	443.049	80.1096	907.468	54.8385	1122.01	73.3103	575.99	76.7139	368.665	227.409	107.722	221.707	88.7757	153.854	70.1888	18.9067	82.9608	197.819	49.2321	232.793	27.9377	114.785	60.6742	490.242
ENSG00000111328.6	CDK2AP1	438.121	18.2756	12.8298	0.70202	0.000224627	18.1429	14.4674	18.9368	13.5784	16.5697	18.7771	14.7891	15.0264	21.3125	16.0495	22.8522	12.2147	25.9194	21.6835	22.3142	12.7694	8.54845	12.0435	10.3887	10.7343	9.64021	20.2643	11.9239	15.8319	13.1448	12.7869	12.7082	14.703
ENSG00000165474.6	GJB2	4934.06	246.034	95.8726	0.389672	0.0321372	194.405	65.3649	667.934	339.063	442.135	109.742	519.151	27.0929	239.424	58.3562	650.189	88.3414	109.291	123.61	54.9128	53.8194	168.26	129.383	49.278	30.6904	73.0264	111.791	36.0232	317.36	75.0724	100.029	54.3163	45.9954
ENSG00000090382.6	LYZ	1596.13	32.7319	85.2268	2.60379	0.02253	25.3094	59.3926	26.2128	19.7943	64.649	27.9654	21.356	80.6206	38.3878	27.7396	10.0493	33.186	15.5953	17.0863	22.1334	83.6973	390.116	75.2813	18.8027	11.6986	18.6313	135.122	110.38	71.9054	56.5934	52.9144	44.5135	36.9929
ENSG00000182831.11	C16orf72	270.346	10.694	8.67199	0.810919	0.000917659	11.6354	7.22998	12.391	10.9309	11.4851	8.98883	10.7986	11.084	10.757	10.1253	10.5829	10.7023	10.8976	9.60808	11.6933	7.91403	8.37439	8.87352	8.11782	8.35488	8.05927	6.38249	10.3083	9.72315	8.33233	11.5103	9.5392	5.94613
ENSG00000033327.12	GAB2	137.827	3.721	6.52402	1.7533	0.000530075	5.92139	2.33557	7.17611	3.19235	4.14664	3.80746	2.78784	5.73823	3.20712	2.18015	2.14206	2.69772	1.97526	2.46657	4.5405	7.44649	5.63527	4.43533	6.48622	8.66983	6.9341	9.56574	8.98468	9.72998	3.71668	4.50136	4.01228	3.39434
ENSG00000158850.14	B4GALT3	206.578	6.50627	8.59878	1.32161	0.00101895	8.05646	4.63701	4.2643	6.56695	5.19052	8.20357	5.87306	7.22425	7.15137	5.69222	7.22917	8.09018	6.09368	4.72939	7.09191	10.171	6.06431	6.63456	8.29058	9.73438	9.47465	11.2837	8.22348	7.49474	6.73665	7.98582	7.83992	10.5504
ENSG00000117394.21	SLC2A1	3117.96	153.009	63.5095	0.41507	0.00227175	202.508	158.018	167.145	161.172	282.718	76.1959	213.65	21.6772	166.329	91.3152	262.269	53.761	117.69	256.039	63.1497	78.1403	28.8942	84.8693	90.2485	117.099	35.3324	44.6288	24.4641	77.7993	74.4927	92.5287	39.1059	36.7205
ENSG00000136026.13	CKAP4	1089.69	45.7471	31.2529	0.683166	0.00224493	33.5918	34.2321	55.6092	57.2965	44.7339	53.6652	58.345	44.5046	49.0946	45.2731	56.723	55.6541	37.929	39.1289	18.9258	32.6264	44.8047	23.5009	17.4414	38.2202	18.4551	32.2862	27.65	32.576	25.6117	44.4269	28.6178	38.7699
ENSG00000150510.16	FAM124A	15.2922	0.466035	0.853975	1.83243	0.00104838	0.339609	0.147476	0.433143	0.135324	0.271531	0.415856	0.39891	0.508257	0.306759	0.428283	0.480915	0.788095	0.113571	0.408837	0.313956	0.584151	0.985988	0.392087	0.567274	0.358734	0.490385	0.673187	1.4071	0.809764	0.930979	1.04947	1.30761	0.244949
ENSG00000146648.17	EGFR	4435.37	245.442	58.1961	0.237108	0.0420955	50.6046	95.7222	68.7198	1206.67	74.7808	290.07	70.9018	38.155	35.7639	36.3187	44.1853	533.799	421.761	688.746	23.9282	53.5287	44.7121	168.255	23.1708	65.4936	33.2979	68.0597	20.5865	31.5299	92.7201	55.7761	34.1697	63.9497
ENSG00000057149.15	SERPINB3	1596.45	76.2792	35.0048	0.458903	0.0414561	36.0607	59.862	35.8227	15.9918	100.702	99.7509	113.612	24.9198	247.442	145.606	76.4509	27.494	9.72932	78.1984	71.0456	53.3427	33.908	48.0599	19.0341	2.14221	24.1756	70.3157	23.2047	39.9156	4.56457	37.2721	59.1801	38.6469
ENSG00000180263.13	FGD6	508.675	21.6636	14.3478	0.662302	0.00130954	20.6563	31.8587	16.2953	30.5202	25.8229	22.6428	15.398	14.8587	24.9209	19.0383	17.529	24.2776	19.4542	29.5666	10.6142	10.1757	14.7854	15.0622	21.1581	17.8131	13.3925	12.4784	13.9732	9.29864	20.4378	14.8808	14.1523	7.61384
ENSG00000101194.17	SLC17A9	58.1395	1.49402	2.96379	1.98377	0.00105503	1.74416	0.827979	0.97648	2.13552	2.38578	2.37261	0.410871	1.9859	1.29168	0.643682	0.671356	1.11612	0.925663	1.96154	1.46094	2.09509	1.27412	2.48178	1.18728	4.53616	5.52763	3.15795	4.6219	3.24612	1.95888	3.74227	1.49208	1.90797
ENSG00000257103.8	LSM14A	1217.66	48.827	37.5427	0.768892	0.000679349	39.7142	49.9864	39.1878	37.5344	38.5832	47.0185	57.4851	43.0904	57.9547	64.9736	63.6914	50.013	48.8258	47.349	45.498	38.1418	35.5423	44.1374	31.5322	32.2388	27.589	38.8306	41.593	31.9778	35.5687	32.7136	57.0704	39.8195
ENSG00000197448.13	GSTK1	471.115	14.0128	20.2864	1.4477	0.00201808	12.4644	16.3347	17.8678	9.86735	12.0722	15.8536	9.92567	19.9401	10.4089	15.3236	14.4269	9.83781	16.4081	12.0355	15.9253	18.2387	26.4523	17.2915	19.4416	27.0581	24.2638	30.0416	20.1616	24.0599	10.6745	12.5807	18.1158	14.0428
ENSG00000152061.23	RABGAP1L	278.477	8.36375	11.9862	1.43312	0.000724795	10.1099	7.09568	5.72429	7.1388	6.74018	8.13349	8.99325	11.4986	7.49166	7.10166	5.1843	7.44951	8.00414	8.24872	15.0421	9.663	8.6967	10.961	8.32064	11.8185	16.0242	16.4064	12.7139	9.0941	13.4849	10.759	16.7299	9.84893
ENSG00000136235.16	GPNMB	1569.89	75.1647	34.248	0.45564	0.0175815	125.427	54.1442	15.6086	98.3017	80.5452	141.845	157.952	23.3869	107.571	151.28	55.9772	51.0838	19.0648	9.72101	34.0625	14.5839	14.7521	60.2093	15.0851	22.1914	15.0025	66.6322	51.5849	15.3793	15.0132	13.0278	128.436	12.027
ENSG00000109756.9	RAPGEF2	200.381	6.47054	8.16333	1.26161	0.0017036	5.0777	4.095	8.47109	7.07105	7.95744	6.04651	4.83953	8.20312	5.96249	5.66297	6.05771	5.08951	7.55213	6.25113	7.22071	8.4944	7.06533	6.42626	8.05852	6.51996	9.24869	7.83416	10.0986	7.15904	7.89622	9.82401	8.91212	7.28591
ENSG00000028203.17	VEZT	487.819	19.8919	14.7878	0.743407	0.00135204	21.5128	16.8455	17.3405	19.3153	25.2342	22.7084	13.6274	17.3706	23.9907	24.2244	19.5531	23.8246	15.7572	21.9176	13.6559	10.7974	12.236	17.4902	13.7432	11.8514	9.65073	15.0372	19.6587	11.4003	15.7701	17.369	22.3768	13.5601
ENSG00000075391.16	RASAL2	237.946	7.18541	10.2281	1.42345	0.00145855	4.85611	6.99981	7.60359	7.48999	10.9915	5.31564	11.003	6.34947	6.58325	10.1806	5.87103	7.47577	3.65977	4.37528	7.52642	7.04686	9.09664	8.38229	7.80351	8.04209	8.66208	12.7783	10.5686	11.2963	14.065	12.9691	12.4102	8.54385
ENSG00000159399.9	HK2	1200.32	56.0557	27.8683	0.497155	0.0450622	104.749	28.4828	44.8966	89.3378	98.7754	33.5054	118.343	9.81275	88.4876	33.2693	75.1027	10.7425	17.3217	47.1647	39.3446	30.0698	21.7476	37.066	29.5319	44.7028	27.7957	15.5738	11.5873	26.1412	25.003	51.6633	26.1867	13.9195
ENSG00000186395.7	KRT10	1494.88	79.3513	23.6472	0.298006	0.0165102	75.455	13.3114	30.2066	13.9594	61.0723	33.4084	60.4967	12.3627	544.599	58.8427	25.3307	23.0956	50.2599	97.0062	89.3624	19.8648	15.3775	23.7686	28.8002	8.97103	34.2715	19.153	14.7479	17.6011	12.3198	10.3885	62.9474	37.9018
ENSG00000138621.11	PPCDC	100.509	3.11792	4.34927	1.39493	0.00314389	3.70445	1.20901	2.10222	3.15825	2.38359	3.39077	2.8712	4.81424	1.75018	3.18121	2.72782	2.85208	3.8824	3.03677	4.20468	3.63971	3.57059	2.87926	5.51302	4.55709	4.78076	4.5101	5.37954	5.14054	5.22565	3.02288	3.80119	3.22019
ENSG00000134287.9	ARF3	552.952	22.6123	16.659	0.736724	0.00207386	16.5911	27.9354	23.8221	20.4282	16.9434	21.1454	19.5978	24.2179	26.138	27.1618	25.1784	29.7863	22.1733	16.5379	20.028	20.0058	17.1316	17.4114	10.9293	9.41283	9.15175	19.7824	13.7518	18.5455	20.3324	14.4423	26.2102	18.1603
ENSG00000132622.10	HSPA12B	45.9268	1.22238	2.33777	1.91248	0.00122351	1.05571	0.274464	1.7548	1.63101	1.15506	0.972952	0.694193	1.68912	1.83504	0.824178	0.613727	0.977803	0.621151	1.69774	1.03875	1.18598	1.26279	1.99552	2.57954	2.98845	3.27806	2.42683	5.10541	2.80378	1.3861	1.72063	1.44623	0.911737
ENSG00000173372.16	C1QA	397.866	9.62807	19.7112	2.04726	0.0178692	4.40457	6.60476	9.78074	12.834	6.47203	9.75034	8.15244	25.4404	16.9203	4.40568	6.39804	11.765	11.2839	4.20564	4.50308	7.83443	76.6967	20.0683	13.6046	15.751	7.75131	15.6305	35.4701	18.7529	6.37677	20.2749	8.12974	8.60402
ENSG00000165898.13	ISCA2	90.607	2.75949	4.00114	1.44996	0.00213632	2.91708	1.57412	1.73866	1.82711	1.89677	3.77861	3.52009	4.03397	3.1903	3.12572	1.57943	2.94776	3.05498	2.30179	2.4059	2.18978	2.8784	4.87487	3.21216	4.05811	3.29775	3.04779	6.34286	3.75208	3.19343	4.40411	5.03885	4.42457
ENSG00000266338.6	NBPF15	290.726	8.58907	12.6685	1.47495	0.00211129	7.88627	3.84195	6.65641	9.97074	10.4198	9.37601	5.06916	11.7362	12.8348	7.83109	7.69934	8.41978	5.75853	12.5658	7.27022	9.73725	11.0479	9.99333	14.7999	16.1989	21.5022	11.5727	12.929	11.4888	6.85952	10.4666	15.0629	11.7312
ENSG00000132432.13	SEC61G	1146.12	60.7003	18.3395	0.302132	0.00698713	19.2951	11.6036	25.3655	144.099	23.1462	186.939	44.5978	9.47747	27.066	23.5968	21.8285	105.856	75.4422	168.162	22.5289	29.6589	28.8925	43.0523	11.3875	7.17877	4.97036	17.1869	9.5366	11.6481	13.6621	24.5811	13.2263	22.1322
ENSG00000102010.14	BMX	9.70645	0.312282	0.601709	1.92681	0.00318882	0.0623955	0.220149	0.221688	0.215476	0.247062	0.347638	0.14436	0.341423	0.206066	0.292267	0.0574321	0.0784303	0.193756	0.139498	0.416594	0.59191	0.379837	0.367904	0.607372	0.642615	0.418307	1.17184	0.988469	0.539744	0.29648	0.156663	0.312316	0.0487541
ENSG00000273331.1	TM4SF19-TCTEX1D2	7.26626	0.24869	0.487377	1.95977	0.0158428	0.18162	0.256323	0.215095	0.156801	0.0898933	0.289115	0	0.110423	0.266584	0	0.0835864	0	0.33839	0	0.242523	0.553797	0.147417	0.486768	0.407984	0.623505	0.243521	0.237975	0	0.39277	0.647243	0	0.727269	0.567651
ENSG00000131018.22	SYNE1	106.823	2.72541	5.28785	1.9402	0.000713163	1.68377	1.04602	2.73984	2.43811	3.04572	2.83462	1.70774	7.12674	3.56353	1.16613	1.57432	3.57365	1.47062	2.53511	2.87521	5.71364	4.98852	5.52735	3.96735	3.18815	7.95526	7.44209	11.0872	5.26332	2.29815	4.23399	3.43968	2.33729
ENSG00000153786.12	ZDHHC7	549.302	16.6786	23.2249	1.3925	0.00187696	13.5292	17.2472	14.657	28.9905	17.652	12.0747	13.7727	19.0404	14.731	17.765	18.945	13.8279	11.0196	13.4213	22.0051	29.6514	15.0319	17.0245	16.9396	31.5732	28.3703	23.6364	25.5791	15.6683	29.7191	21.5696	21.1818	24.6781
ENSG00000110917.7	MLEC	851.076	34.7334	25.6058	0.737211	0.00190183	23.6724	35.6879	24.7148	27.0701	36.0008	37.2686	29.6922	43.3044	43.7486	36.2294	53.047	43.5044	24.9237	25.1135	35.5227	28.1458	26.0946	24.0241	21.2746	25.5992	17.6685	31.3135	23.901	22.9405	24.9651	29.2716	35.3776	20.9998
ENSG00000077044.10	DGKD	143.25	4.12717	6.47251	1.56827	0.00143693	3.24325	3.93239	2.46165	3.61996	3.50318	5.79034	2.37133	6.16617	2.709	3.00757	2.46573	3.6713	5.09682	7.57146	4.7974	3.8671	4.26139	5.77251	6.0243	10.3139	10.4271	6.72267	6.85061	6.3034	3.83139	7.31837	4.23336	6.9165
ENSG00000275385.1	CCL18	334.889	8.01838	16.7241	2.08572	0.0403984	3.75981	5.92534	6.77814	8.43966	11.5998	21.8456	11.8304	6.01962	20.971	1.66329	2.9993	9.45206	1.79021	2.52176	3.17971	12.2712	75.4289	9.40504	14.9211	16.7797	5.04125	12.5898	17.4718	20.9597	13.1011	6.81789	9.66065	1.66476
ENSG00000074410.13	CA12	696.974	32.8594	15.9141	0.484311	0.0141364	65.0242	7.6869	27.5599	32.0998	61.9504	70.5817	22.954	6.37554	30.4586	26.8021	50.2988	12.3986	27.4628	37.3966	12.3402	33.743	4.74152	21.38	9.33989	1.34244	8.53885	8.07253	6.14427	38.814	11.3191	33.6625	15.7464	12.7394
ENSG00000011021.22	CLCN6	166.399	5.21494	6.99804	1.34192	0.00194569	3.96258	3.59731	4.94661	5.88057	5.24777	5.40433	3.31037	7.21462	6.49227	5.06669	4.3177	4.52321	6.38527	4.5972	5.7776	5.18142	5.58946	4.8107	6.04653	9.70636	10.6837	5.75345	8.16642	6.65483	7.14981	6.57907	6.92596	6.42681
ENSG00000081721.11	DUSP12	184.294	5.70406	7.81025	1.36925	0.00642503	7.35304	3.01507	4.55028	5.83351	5.50829	6.01069	6.80488	5.9205	5.94337	6.43855	3.56699	5.74545	6.23287	6.29432	4.84304	9.96486	5.80697	7.5633	9.67246	8.52808	6.66158	6.42309	7.03118	3.58145	6.25595	7.3183	10.2457	11.1803
ENSG00000175787.16	ZNF169	56.6995	1.72789	2.58317	1.49499	0.00280331	1.5236	1.79969	0.915287	2.00169	1.54101	1.66085	0.8736	2.2957	1.22757	1.68075	1.43289	2.87272	1.35766	0.913294	2.322	2.50244	1.6937	2.48559	3.29856	3.41123	3.95254	1.69257	2.37871	2.19662	2.47877	1.24744	3.18314	1.75987
ENSG00000116678.19	LEPR	47.7207	1.24852	2.44561	1.95881	0.000404555	0.739131	0.630235	0.972626	1.03696	1.86728	0.747629	1.48919	2.00351	1.26572	0.613092	0.666162	1.02586	0.765072	1.99675	1.40851	1.95639	1.56233	2.10479	1.4874	1.92071	1.30075	5.74361	2.95985	2.16455	2.45114	1.09545	1.5107	4.23527
ENSG00000185246.17	PRPF39	368.141	11.5716	15.1821	1.31202	0.00526727	14.9451	8.16638	13.8178	12.1673	8.92575	14.7208	10.8414	10.4463	13.248	5.57043	7.64602	13.2527	13.7573	12.1959	12.3722	16.7538	10.7043	12.1022	19.8031	15.4774	15.6598	13.3496	19.7957	10.7222	12.6087	16.9944	15.8143	16.2822
ENSG00000197885.10	NKIRAS1	87.8471	2.81954	3.71953	1.3192	0.00329027	3.2768	2.3123	1.99013	2.30674	1.92128	2.64823	3.33577	3.49412	2.62685	2.5975	3.29455	2.59807	2.56733	2.59227	3.23123	2.90355	2.23005	3.78314	3.73706	2.94213	3.78527	4.02934	3.40749	2.39847	5.56931	3.29096	4.28969	4.6875
ENSG00000010327.10	STAB1	256.939	5.8368	13.2451	2.26925	0.00288493	4.23318	4.11904	5.9469	11.0498	6.28567	4.7776	3.4126	13.3814	5.89192	3.43387	3.03649	5.92383	5.73051	3.89412	4.93508	5.05333	8.93889	7.11755	10.7846	19.7742	34.5879	14.2929	26.493	20.2404	7.66079	7.07197	4.03913	4.83233
ENSG00000266714.8	MYO15B	212.631	4.24155	11.6775	2.75312	0.0204366	2.03057	2.08156	1.95528	8.13764	4.58378	3.23239	2.60294	4.69637	4.35494	2.29216	1.67961	7.58822	9.28784	3.31281	4.28708	3.0075	2.76735	5.80994	8.70158	25.3719	55.9061	10.1452	12.0559	8.64412	7.0408	3.82378	5.60386	1.62951
ENSG00000124491.15	F13A1	208.181	4.16904	11.4189	2.73897	0.0039887	1.49323	3.05577	4.06745	3.51302	7.48319	3.68439	2.10742	13.2776	6.00002	0.903452	1.63216	3.80088	2.89808	2.78204	4.33688	6.75389	5.15109	9.52496	7.79885	6.83507	3.50379	25.3376	41.5554	16.6576	6.5188	6.15498	9.86604	1.48763
ENSG00000181929.12	PRKAG1	308.804	12.4203	9.63848	0.776027	0.00298952	10.7543	14.6462	12.9677	8.4899	11.702	13.6222	10.7078	9.59153	13.3131	15.354	13.7505	12.1504	12.5784	10.2286	14.9473	12.6745	10.4442	10.1834	6.67402	6.03358	6.62069	12.0991	8.70631	9.65278	10.4388	7.35463	14.1591	8.95896
ENSG00000085978.21	ATG16L1	226.721	7.14066	9.4162	1.31867	0.00215993	5.67488	5.65946	6.22935	5.92427	6.4631	6.56783	5.11786	8.37925	5.43978	7.0749	6.23618	9.28051	7.19272	10.1629	10.2069	13.6548	8.98907	7.66683	9.214	8.0181	11.4912	8.80151	7.95047	8.76604	7.87623	11.2195	6.17378	11.2891
ENSG00000073849.14	ST6GAL1	229.038	5.63176	11.3355	2.01279	0.0240393	4.6492	3.57777	2.50759	4.39379	4.8106	8.23845	2.94809	17.437	5.48319	2.0911	2.67681	9.83618	4.64602	1.69674	7.98385	9.43796	6.99599	9.25054	1.73347	36.0596	5.56678	17.5067	23.7022	8.89581	8.56832	8.42268	6.1099	3.81215
ENSG00000181143.15	MUC16	178.736	2.32645	11.2799	4.84857	0.0241766	1.0306	1.32202	0.771123	2.21751	4.44259	0.295684	5.96845	0.529448	0.573134	7.88355	0.143396	4.83534	0.431669	0.407835	2.54436	21.2735	0.638731	1.32754	11.9374	40.5094	8.77851	11.3247	5.04989	1.18925	40.5854	0.852515	1.23566	0.636733
ENSG00000256525.6	POLG2	276.379	8.35287	11.8374	1.41716	0.00528447	7.44149	8.13199	5.05935	11.7338	7.46868	8.88438	4.35204	8.64027	5.12002	7.54422	9.20408	13.706	9.49995	8.5881	8.41874	9.3669	7.57106	15.6507	14.0463	12.8325	14.2044	9.54739	13.9719	5.96034	9.02395	10.7693	17.1237	12.5175
ENSG00000182768.8	NGRN	276.38	12.3823	7.18808	0.580512	0.00783581	16.7481	17.5029	15.1368	3.43805	8.41342	5.05323	21.9227	6.10133	14.6797	14.2297	18.0236	8.23782	10.0624	12.5153	12.1697	9.10507	5.67034	6.98926	5.96369	5.78092	4.69874	5.05887	8.17121	3.55961	10.5153	4.43749	11.6863	10.5083
ENSG00000222009.8	BTBD19	148.296	4.22452	6.74832	1.59742	0.00543153	3.33252	4.28206	4.24128	5.196	6.647	2.37534	2.8079	7.6812	4.36221	2.32983	3.54815	5.00172	3.64512	4.22569	2.19181	2.78052	6.47971	4.0259	7.59778	8.9362	7.60283	3.28037	9.19295	7.17103	10.6945	9.44967	4.63076	4.58604
ENSG00000242574.8	HLA-DMB	205.865	5.07458	10.1959	2.0092	0.0267786	2.14386	4.72428	4.21682	6.13718	3.89073	4.49044	1.94923	17.6308	4.47174	1.99667	1.4021	5.01139	9.6706	1.7098	5.17307	3.52976	21.3241	10.9474	4.13997	2.49634	16.4908	9.90571	26.4157	17.7589	5.67423	3.99777	4.48063	4.08502
ENSG00000104133.14	SPG11	459.665	14.7678	18.5344	1.25506	0.00508581	16.455	14.0402	10.088	14.8695	11.7926	15.8599	15.5564	17.1621	11.3501	21.1604	13.8136	12.1614	17.8612	10.4796	17.3673	17.4706	17.3126	15.4079	21.1917	19.2527	20.8353	22.1221	21.5907	16.5469	17.5642	11.3117	17.1235	21.9177
ENSG00000165124.17	SVEP1	48.8084	1.33117	2.43392	1.82841	0.00296779	1.5423	0.644295	0.98391	2.40742	1.74658	1.16864	0.742208	1.32029	1.05946	1.27147	0.545132	1.98518	0.314177	1.12179	1.61464	2.18209	0.801181	2.23544	1.58908	3.74162	2.43191	4.31656	4.73024	1.57429	2.31578	1.53864	1.54397	1.34008
ENSG00000054282.15	SDCCAG8	405.104	13.2834	16.0502	1.20829	0.00331942	12.8959	11.1198	9.2468	11.2189	11.8865	10.3952	15.0095	17.9814	15.8866	11.3261	10.2652	16.5822	13.3008	14.0971	16.5394	14.9799	14.6595	18.7451	13.8932	15.4726	16.1884	18.8659	16.2604	12.9246	15.6318	17.4561	15.6434	16.6314
ENSG00000110324.10	IL10RA	188.405	4.45919	9.56285	2.14453	0.00243287	4.51643	2.74483	3.77065	6.47387	4.16065	5.76195	2.56984	13.4801	4.74198	2.54742	1.54153	4.26461	2.25471	1.61044	4.94883	4.29033	12.5587	9.31307	4.35271	4.30282	15.0379	14.4879	23.2107	13.8485	6.8283	6.78223	4.69439	3.3095
ENSG00000047457.13	CP	163.202	2.9893	9.32018	3.11785	0.0296287	0.86389	0.338673	0.511558	0.476507	3.777	2.12009	7.08436	4.52288	2.81784	3.03491	0.960831	0.573113	1.08795	0.125184	15.0446	8.71556	2.13281	7.87219	1.34765	15.735	1.3192	20.9306	10.5431	4.04786	43.0157	0.622602	2.64253	0.937527
ENSG00000139579.12	NABP2	188.933	7.66442	5.9051	0.770456	0.00254785	7.26218	10.8063	5.7338	7.49649	6.56375	7.60223	6.24596	6.0471	6.95186	8.9972	9.22752	8.03702	6.12804	6.35328	10.0137	6.20457	7.43224	5.83911	4.37391	7.22644	4.02194	4.41302	5.08543	5.74717	4.68847	4.95488	8.13931	7.3398
ENSG00000168404.12	MLKL	271.76	7.84224	12.0713	1.53927	0.00560547	6.30565	3.21242	10.7829	15.907	8.44953	8.91155	8.61104	8.49042	7.42698	6.96385	10.9711	6.14758	4.16452	4.46998	5.31907	12.8807	16.0535	10.0741	9.21286	6.44143	17.2395	13.9048	15.7881	12.8383	5.0424	15.5491	12.2863	8.31591
ENSG00000161642.17	ZNF385A	783.094	33.5387	21.7549	0.648651	0.0056288	50.1728	42.0506	34.7652	41.4147	21.7529	25.6438	33.3591	13.9966	25.343	41.9209	36.9049	49.2211	29.0054	17.5667	38.4629	25.2273	12.8967	17.7424	25.7332	31.7641	26.8058	22.4429	15.1231	26.9571	38.0764	15.2571	14.6657	8.8219
ENSG00000187790.10	FANCM	134.423	4.15875	5.75702	1.38431	0.00514735	4.09379	3.74962	2.58741	3.46296	2.70164	6.20408	4.02778	5.98362	4.0894	2.14678	2.94029	5.11985	5.18768	3.7134	4.87298	6.83682	4.41365	6.83807	4.79933	5.51278	4.57421	4.82223	7.00944	3.0703	4.24901	6.05648	7.26504	8.09386
ENSG00000146966.12	DENND2A	46.0225	1.22318	2.34422	1.91649	0.00848108	0.680193	0.215993	1.39631	0.910227	1.88531	1.08278	0.755384	1.79895	1.36031	1.24789	1.04869	1.02599	0.697025	1.69813	1.04453	0.82962	5.28632	1.73187	3.33605	2.37404	2.50806	2.31726	3.69963	2.05937	0.929207	1.48012	2.14493	0.478336
ENSG00000136098.16	NEK3	98.2393	2.92115	4.4017	1.50684	0.0038813	3.85245	2.57391	1.90914	4.45827	2.33276	2.90319	1.95331	3.8124	2.93261	3.74344	1.32032	3.86369	1.90899	2.80991	1.9428	3.5824	2.72776	4.32777	2.36297	4.92441	6.97888	6.94526	6.01649	2.80664	4.38162	3.63587	4.06177	3.17032
ENSG00000260314.2	MRC1	172.42	3.99402	8.86996	2.22081	0.0243517	2.29041	1.52117	6.67504	5.03079	8.68572	3.2707	2.13525	6.28695	8.07101	0.946634	2.80579	3.42942	2.53117	2.23403	2.49625	4.27938	32.8481	6.68028	4.84244	2.62101	2.80007	10.5627	16.755	9.42084	3.84112	11.6425	6.13687	1.57911
ENSG00000178773.14	CPNE7	161.043	3.28759	8.80997	2.67976	0.0157112	9.70762	1.41869	1.06578	3.7194	0.625478	4.48052	4.46539	1.85097	1.43333	12.7356	0.845956	2.3105	0.107024	0.17123	2.87639	3.54194	0.559486	8.15943	32.6457	11.6347	7.70191	3.86361	3.45795	2.27741	6.89175	7.49968	22.8865	2.10951
ENSG00000197054.11	ZNF763	13.6562	0.436884	0.761767	1.74364	0.00401799	0.307701	0.347411	0.218649	0.265653	0.182757	0.440836	0.142381	0.486406	0.406482	0.0960868	0.424836	0.386776	0.30576	0.137586	0.903943	0.229348	0.599407	0.560784	0.737288	1.05634	0.742632	0.698842	1.36489	1.06469	0.584831	0.463547	0.308035	0.192343
ENSG00000172893.15	DHCR7	506.549	26.3466	8.78082	0.333281	0.0103675	19.6967	9.41458	13.2253	3.74258	3.83291	22.0084	59.3785	5.14329	36.5095	64.5632	16.5028	8.83476	9.14845	67.1834	54.5142	32.7246	4.06515	4.69244	8.25672	9.10258	7.33606	4.26464	14.9795	2.97322	5.44949	9.9332	4.92952	4.14358
ENSG00000146094.14	DOK3	93.7666	2.59074	4.43888	1.71336	0.00256468	2.90411	1.30644	1.74835	3.91759	2.58732	3.92951	1.83094	4.59076	3.15706	1.72874	2.08836	1.96211	1.91635	1.48793	2.20559	2.92715	5.98139	4.16414	3.99576	2.53401	8.27456	3.94793	6.1726	7.615	2.45799	3.76737	2.07143	2.49611
ENSG00000130775.15	THEMIS2	233.175	6.19482	11.004	1.77633	0.011585	6.17579	3.42223	8.40595	10.3039	7.05109	5.63927	5.76799	11.5179	6.9099	4.20018	3.749	6.23889	3.57668	2.56946	5.89414	6.05887	14.2233	8.22523	5.61731	11.8798	16.0025	14.3308	16.0861	16.5239	6.48111	18.7089	2.99642	4.61836
ENSG00000112378.11	PERP	9248.84	411.944	236.344	0.573728	0.0044537	385.261	477.171	620.444	161.797	529.437	368.945	708.871	192.996	625.365	355.568	621.422	179.036	303.117	309.588	338.645	422.636	202.133	256.761	138.678	128.665	119.621	345.538	106.679	259.01	441.026	134.441	261.478	254.506
ENSG00000139514.12	SLC7A1	749.202	32.0732	20.8388	0.649725	0.00327057	23.1712	25.1368	47.9831	44.9618	29.5504	24.4575	48.175	22.7925	22.4596	16.9522	36.8946	51.6142	37.9982	26.0378	21.4128	26.073	19.2232	21.3393	21.4237	12.3462	13.0622	25.45	18.2458	30.5352	33.4197	22.0027	13.535	12.9476
ENSG00000185633.10	NDUFA4L2	441.468	22.1005	8.67388	0.392474	0.0265093	3.93092	64.3717	17.2177	42.6104	52.8405	21.7025	15.9951	2.80726	26.9259	13.4443	6.97801	3.84309	8.75777	37.2926	11.2897	5.9191	1.74725	14.3148	18.7818	12.3525	3.84843	3.51552	13.8386	14.0333	12.3039	4.38657	2.81084	3.6078
ENSG00000140968.10	IRF8	160.295	3.69099	8.28695	2.24519	0.0134504	2.47597	2.80029	4.35163	3.16251	3.05533	3.3745	1.45959	11.9811	5.7252	2.9921	1.82634	3.24017	3.30715	1.44076	2.67217	3.36694	13.82	6.21781	2.66668	1.74659	15.3259	11.7622	19.236	16.9682	4.31111	4.82574	3.05588	3.12725
ENSG00000109466.13	KLHL2	215.961	6.63465	9.17238	1.3825	0.0039788	5.24522	5.52009	8.17554	9.52535	7.72126	3.92291	6.71637	9.18225	3.74994	5.15387	7.32521	5.00172	5.8131	4.27961	10.6873	11.1527	8.69834	6.78659	6.36534	7.50289	12.6714	8.65021	7.97518	11.2129	12.7302	8.36354	6.29204	9.53953
ENSG00000133639.4	BTG1	701.734	29.0314	20.6971	0.71292	0.00275143	28.6753	25.6055	21.487	29.5213	21.0305	26.24	29.8757	24.8467	39.4825	47.0536	27.6061	28.3822	25.3807	22.2032	36.5813	24.4897	12.4134	21.5191	15.3408	14.1163	13.8802	35.6353	27.9612	22.2831	20.0525	10.1431	22.2791	27.6483
ENSG00000110077.14	MS4A6A	164.969	4.00444	8.28483	2.06891	0.0081392	1.69307	4.71492	3.34188	3.78478	3.09757	2.16574	2.65806	10.1467	5.60259	2.36027	2.04539	6.87855	5.10726	1.39693	3.5729	2.69394	13.1656	8.79985	4.93517	2.38721	5.75636	8.90009	26.3746	13.3162	5.24351	6.14874	4.35834	4.32311
ENSG00000140743.7	CDR2	210.903	6.52296	8.91218	1.36628	0.0033895	5.36598	5.47641	5.35711	6.47048	7.55067	6.10641	4.43243	9.00549	5.06098	5.40087	9.91909	7.13518	4.95756	5.51919	8.58661	8.4289	10.1687	7.72565	10.1612	15.1736	9.21654	6.17876	10.5382	5.2108	7.79664	8.94485	6.83684	8.17775
ENSG00000117000.8	RLF	441.713	17.5264	13.9705	0.797108	0.00887262	16.6504	20.6704	18.5685	13.1409	22.8366	15.6845	21.1422	16.003	21.035	17.4629	19.2348	9.02007	16.4166	18.0905	15.4402	13.4572	13.9584	17.6098	12.0269	11.2911	10.3358	13.455	15.9568	12.3058	13.7189	14.1699	12.5154	19.5153
ENSG00000129467.13	ADCY4	96.3567	2.42948	4.82419	1.98569	0.00417583	2.06183	0.643239	2.24479	2.81064	2.42773	3.50672	2.10898	3.00858	2.79541	3.60897	1.46831	2.53713	1.24008	2.24822	2.23156	2.52213	2.43103	2.79208	3.34776	6.48223	10.6217	4.76808	10.0168	6.60229	4.9243	2.23422	3.12869	1.54322
ENSG00000198218.10	QRICH1	468.528	15.3239	18.5746	1.21214	0.00445062	14.7414	12.9637	11.1488	16.6577	15.0811	15.3823	15.0126	19.4739	13.9032	16.405	15.84	16.1685	13.8021	13.4535	18.3242	15.3499	15.9192	16.8617	18.7863	23.3545	26.7241	18.7176	17.4183	19.4169	20.7262	16.9209	16.1917	13.7824
ENSG00000100490.9	CDKL1	74.8452	2.01252	3.65057	1.81393	0.000439331	1.99312	1.66767	1.56242	1.5241	1.73342	3.05947	1.79184	1.76577	1.94339	2.88971	0.956601	2.46954	1.07869	1.40047	2.85159	9.75286	2.56532	2.97618	2.75033	3.12797	1.56528	3.793	3.18758	2.27831	3.21323	3.71752	2.93592	4.2939
ENSG00000139193.3	CD27	151.583	3.43361	7.91377	2.3048	0.0403151	3.84931	1.40196	2.10783	2.25127	2.33544	6.32525	1.55135	11.4753	6.37911	1.06633	0.857205	2.80948	1.85082	1.01791	4.7256	9.63389	5.3921	7.58778	1.02276	3.26817	10.156	30.2624	11.4093	8.86156	7.81771	3.42948	1.86459	0.873217
ENSG00000076344.15	RGS11	22.1225	0.620057	1.20167	1.93799	0.00321944	0.766302	0.231749	0.273703	0.630081	0.469588	0.348528	0.168851	1.61957	0.482052	0.142438	0.520612	0.963232	0.294616	0.353524	0.535998	0.494521	0.281376	0.52812	2.15857	1.21097	1.85924	0.876578	1.77279	1.07849	0.8236	0.824588	1.89957	0.513229
ENSG00000172935.8	MRGPRF	28.0116	0.858008	1.38011	1.60851	0.00533345	0.446312	0.269952	1.03198	0.440368	1.45165	0.608972	0.324532	0.814061	0.959256	0.199102	0.264092	1.60288	0.514773	1.37795	1.06424	0.993671	0.698645	1.162	1.05032	1.09443	1.28234	1.92148	1.81812	1.83846	1.43905	1.60086	0.446796	1.2953
ENSG00000198879.11	SFMBT2	111.854	2.99816	5.36013	1.7878	0.00284842	2.46272	1.9861	1.93748	3.29558	2.35079	4.28434	1.40004	7.24057	3.23396	1.38702	1.17389	3.44939	2.23961	4.24744	2.78353	2.87262	7.65304	7.24163	5.49264	3.01949	6.84002	6.44608	11.0541	4.5777	3.30161	4.84368	2.60627	2.43286
ENSG00000104043.14	ATP8B4	38.7383	1.08639	1.94173	1.78733	0.00205133	0.75765	0.625645	0.719109	0.848959	1.10107	0.962295	0.619118	2.0778	1.14167	0.855766	0.890275	1.31709	1.28148	0.56463	1.03324	0.835616	2.64959	1.83187	0.832873	0.922351	1.81561	2.87262	4.4776	2.13817	1.5128	1.65947	1.32329	1.07065
ENSG00000137841.11	PLCB2	143.278	3.14829	7.60413	2.41532	0.00413482	2.3106	2.13477	2.21927	5.51155	2.44055	3.52649	2.27062	9.80482	2.82336	1.50631	1.43614	2.60498	2.98839	1.3314	2.81505	2.92958	6.01307	5.79692	7.79459	5.28823	26.7332	6.7418	14.0883	11.6938	2.97115	2.81103	2.55157	2.14047
ENSG00000172375.13	C2CD2L	64.7728	1.97212	2.92238	1.48184	0.00657911	1.74778	1.27355	1.28245	2.42743	1.66431	1.79937	1.67023	3.58061	1.63824	1.49794	1.68744	1.67158	1.62821	1.55735	2.95539	1.85368	2.7139	1.87372	4.4098	4.17402	3.84634	3.35218	3.59145	3.095	2.75322	2.16237	1.69262	1.17269
ENSG00000134853.11	PDGFRA	144.287	3.44462	7.33986	2.13082	0.00747162	1.65511	1.20603	5.75267	1.25808	6.17071	2.99269	2.48073	6.2237	4.19862	1.61515	1.31646	6.17351	1.54188	3.96849	3.61547	2.46243	5.24222	9.33474	3.62368	17.3549	1.92975	7.6768	15.3711	6.83444	2.5645	9.35024	8.7888	3.58457
ENSG00000072121.15	ZFYVE26	181.719	5.73319	7.57856	1.32188	0.0083524	5.22815	3.16225	5.7473	6.71764	4.85536	6.24632	3.8016	7.31297	7.31397	6.71843	6.70024	6.29148	6.00934	3.04885	5.34392	4.75872	5.81793	6.80592	6.36046	10.4986	10.5973	6.65079	9.60691	8.19651	6.19731	8.57399	5.81412	7.34278
ENSG00000150455.13	TIRAP	76.7999	2.36179	3.39793	1.43871	0.00347805	1.95023	1.27298	1.30882	2.02047	1.42377	1.94031	1.7146	4.8911	2.05747	2.39796	2.60289	2.26756	2.60409	2.87043	2.60421	2.4117	3.30441	3.37135	2.95712	4.79821	3.92237	4.89779	4.27388	3.02258	2.0271	3.34604	2.63566	1.90482
ENSG00000123329.17	ARHGAP9	140.831	3.40697	7.11744	2.08908	0.00973587	2.59532	1.44585	3.11412	6.07338	3.32972	5.16425	2.73368	9.25997	2.65659	1.62623	1.71307	2.91889	2.20568	1.11976	3.64802	3.80643	4.73976	4.90569	3.78441	4.84567	26.0533	8.03921	12.4788	10.2406	3.083	3.97269	2.76907	2.50821
ENSG00000113532.12	ST8SIA4	92.3712	2.55965	4.36742	1.70626	0.00886499	1.28043	2.07657	2.31455	1.82303	2.51277	3.07528	2.29719	6.05036	3.36319	2.24474	1.74719	2.34363	2.09268	1.13837	2.5347	4.31527	6.27222	4.45523	0.99241	2.69914	2.13851	5.98491	8.68321	5.14945	2.45499	3.91054	4.1378	4.2828
ENSG00000272886.5	DCP1A	249.56	8.30983	9.82404	1.18222	0.00670767	6.80096	7.723	7.0956	9.44882	8.44366	8.46081	7.47077	10.511	8.12653	8.99028	8.04852	7.29155	7.04556	7.92193	9.76839	8.04523	8.73253	11.6718	7.55312	7.8153	10.0768	8.84884	11.2569	11.4942	10.5569	10.3556	11.9003	8.10508
ENSG00000187955.11	COL14A1	136.651	3.30879	6.9092	2.08814	0.0138925	1.13387	3.40053	3.0614	0.978924	4.52978	2.90084	3.56964	5.66279	6.80583	1.83362	3.28012	2.79962	1.32037	2.08233	4.77211	6.02988	2.56379	4.40646	4.44224	5.05111	2.74201	19.9774	18.2194	11.1366	3.94459	2.47412	4.11474	3.41733
ENSG00000125454.11	SLC25A19	105.764	3.25546	4.59476	1.4114	0.00535457	4.32952	1.90016	1.87592	2.73504	2.48264	3.82423	2.49201	3.53115	2.5381	4.86389	1.87107	4.84485	3.24634	1.96739	4.82955	5.16974	3.25703	3.82075	6.44425	5.31697	6.72546	3.48217	5.409	4.03446	2.44609	3.97705	4.01708	4.33185
ENSG00000186642.15	PDE2A	27.8388	0.786098	1.44979	1.84429	0.00818714	0.487557	0.137619	0.606292	0.989189	0.96527	0.504481	0.462491	0.741076	1.26132	0.342565	0.617064	1.89984	0.242241	0.399681	0.634775	0.925035	2.60198	0.627227	1.25951	1.75748	1.37283	1.8207	2.18843	2.21421	1.04251	1.02014	0.317256	0.400012
ENSG00000066336.11	SPI1	297.37	8.10411	13.7391	1.69532	0.00566216	4.90804	7.22537	8.01747	9.57056	9.21439	9.49676	9.98492	14.5086	9.09826	6.20988	5.56914	9.25402	6.20147	3.90991	6.89287	7.39681	25.5165	11.7028	7.85707	9.19939	22.3521	12.788	20.198	23.1192	8.14231	14.7311	7.0312	7.27329
ENSG00000164330.16	EBF1	135.785	3.30868	6.84265	2.06809	0.000967896	2.04045	1.53985	3.43461	1.90842	3.68903	3.7218	2.50467	6.2201	4.3261	2.7434	3.05197	2.92104	1.95366	4.13946	3.93565	3.53334	4.37048	6.97258	3.56501	5.41582	6.68772	11.3256	21.1009	8.35545	4.20809	3.98469	4.87969	3.25513
ENSG00000206073.10	SERPINB4	333.627	16.581	6.74711	0.406919	0.0368536	3.73995	7.1195	4.29193	2.2527	29.6175	24.8524	20.0022	4.01891	53.6188	25.6663	43.631	6.12232	6.04989	3.62978	12.6013	9.84211	10.7306	6.48037	1.4979	0.298589	2.09914	20.0196	4.1336	6.39515	0.619913	4.80434	14.8019	4.68926
ENSG00000145990.10	GFOD1	221.774	6.43391	9.85118	1.53114	0.00502827	12.6158	3.35288	9.61794	7.6243	6.94976	3.07761	9.32513	3.68574	6.69763	5.62799	3.67974	5.33404	5.30146	4.07819	8.04031	16.331	10.2599	9.78361	9.56927	12.3557	11.8849	6.91273	5.3123	11.2203	14.0328	6.32148	6.38038	6.40108
ENSG00000167642.12	SPINT2	783.214	34.0024	21.2291	0.624341	0.000924179	28.9614	27.6135	27.0141	37.244	28.2357	21.041	33.9237	19.2872	40.0013	50.1883	79.8954	33.187	28.1931	22.587	31.1634	20.9364	20.8969	17.8167	27.3848	27.5538	28.2662	28.1962	15.827	20.7559	16.4016	16.4599	15.4741	18.7089
ENSG00000198909.7	MAP3K3	187.399	5.68964	8.06573	1.41762	0.00701129	4.04233	4.51141	4.67421	5.96507	6.31446	5.11137	2.94503	8.00061	7.46933	4.27486	7.86377	6.95507	6.32082	4.20895	5.18731	4.23491	7.38821	6.16234	7.10558	12.3027	10.4942	8.50217	13.0499	9.29991	7.04962	6.91032	5.96963	5.08507
ENSG00000177675.8	CD163L1	118.462	2.94589	5.92873	2.01254	0.0286285	2.58469	0.8251	2.63593	4.35671	3.35054	3.42873	1.80824	8.79273	3.16153	1.53739	0.877995	3.32627	2.50341	1.44465	2.05442	5.23331	4.57048	5.50888	3.06435	4.19016	9.44792	12.727	11.894	8.29571	4.7152	2.72978	2.98794	0.408729
ENSG00000167618.9	LAIR2	11.4976	0.358784	0.685838	1.91156	0.0218456	0	0.343825	0.128232	0.140219	0.241161	0.517081	0.075153	0.592476	0.655579	0.507174	0	0	0.100868	0.36311	0.216876	0.495232	0.988703	0.696467	0.121613	0.185856	1.08884	0.7803	1.02918	0.351234	0.385864	0.679649	0.812949	0
ENSG00000168477.19	TNXB	92.3686	1.25207	5.87596	4.693	0.00424184	0.935442	0.543614	0.538723	2.26131	1.0186	1.20004	0.483777	2.99091	1.42959	0.695918	0.384931	2.07501	1.0594	0.524896	1.13891	2.76287	0.803938	1.61635	13.9925	16.3718	9.07497	10.94	8.47313	4.40296	4.7717	0.414479	1.10171	0.361165
ENSG00000063601.16	MTMR1	409.518	16.589	12.5757	0.758076	0.00317738	14.4817	13.7362	13.8606	14.9889	15.9116	16.7056	16.4131	16.9024	11.0448	14.5482	18.4016	27.9837	15.7351	14.713	21.9077	10.0755	8.56298	9.87023	18.0798	13.6251	15.8532	16.496	11.0542	11.7567	14.1439	8.82948	13.9707	9.86598
ENSG00000107562.16	CXCL12	103.829	2.04645	5.84094	2.85418	0.00300277	0.547401	0.467599	1.8084	0.970068	2.85197	2.40778	1.09317	3.22305	3.44651	0.607282	1.03423	1.12265	1.62826	3.56414	4.42425	3.08449	3.09849	3.66006	1.51011	2.80237	2.47232	20.6116	16.1267	8.53585	4.34648	1.61554	2.22082	4.54738
ENSG00000074582.13	BCS1L	181.37	5.44251	7.88711	1.44917	0.00486181	2.84981	4.93606	4.52054	6.3075	4.15462	4.61899	3.66833	6.6156	4.01186	4.16644	3.7439	8.1413	7.91626	8.22484	6.26169	8.14545	5.74074	6.63802	7.52684	14.0526	10.4906	7.03818	5.03453	6.05092	6.95526	9.93072	4.35715	9.27141
ENSG00000175309.14	PHYKPL	341.615	10.3673	14.5311	1.40163	0.00377872	9.37715	9.3227	7.8232	11.2081	9.58158	10.6978	6.3543	16.0268	7.26427	8.44308	8.11335	11.0535	13.0452	13.6503	12.0486	12.3196	10.8164	11.8959	17.8346	11.8276	24.5036	13.115	22.624	18.0107	10.8174	10.5339	11.4525	11.8535
ENSG00000100365.14	NCF4	171.988	4.37999	8.39141	1.91585	0.00675001	3.98139	3.9333	4.40087	6.01532	3.89193	7.44696	3.73065	9.31951	4.20033	1.94263	2.70271	5.3799	1.60724	1.26101	4.3861	5.6991	9.12926	5.9756	5.21713	5.23948	18.0169	12.3029	14.0863	14.135	6.03014	5.91461	3.78643	2.25544
ENSG00000188641.13	DPYD	199.571	5.21715	9.5472	1.82996	0.0137365	1.98873	2.66812	8.00601	8.90278	6.90243	3.498	8.23668	8.32956	3.36054	5.29023	4.56503	5.55513	2.62271	2.6348	4.19653	3.51864	18.2345	9.33093	3.51142	8.09167	13.201	17.801	12.8615	11.8936	7.78724	5.03441	2.70367	8.84401
ENSG00000173421.16	CCDC36	18.2541	0.521083	1.01829	1.95419	0.00512093	0.363911	0.427995	0.654459	0.174546	0.620409	0.321832	0.243232	0.885019	0.445128	0.315666	0.279136	0.609909	0.251122	0.210934	0.51294	0.397279	0.590755	1.56054	1.05969	1.01796	0.487941	0.688755	2.60496	1.10762	0.624422	0.981394	0.121435	0.695078
ENSG00000161010.14	MRNIP	78.4027	2.3642	3.51844	1.48821	0.00232014	2.34926	1.62869	1.46435	2.18835	1.43817	2.47673	1.30638	5.24974	1.36116	1.70533	1.41314	2.43492	3.83954	2.27291	2.83435	2.3459	2.45882	2.47436	4.69092	4.52775	5.30518	3.44725	4.09169	4.01092	2.59486	2.4836	3.2389	2.76957
ENSG00000122435.9	TRMT13	264.481	8.2201	11.0753	1.34735	0.00509499	7.58278	9.02769	7.07394	6.1077	8.11428	8.90134	7.9584	9.58111	5.23861	6.44889	5.43941	8.94573	13.8649	8.23969	9.27704	11.898	8.83672	11.6261	6.91497	11.8282	9.59919	13.3586	11.9455	6.87086	10.5173	10.069	10.3475	18.8672
ENSG00000087589.16	CASS4	32.2429	0.913109	1.64202	1.79827	0.00852496	0.863492	0.633704	1.11809	1.19279	1.76084	0.687282	0.671262	0.923993	0.722443	0.808938	0.604052	0.520992	0.407572	0.566287	0.714892	0.830848	2.92966	1.8144	1.57764	0.434777	1.29673	1.23703	2.0428	3.187	0.779569	2.51496	0.726121	0.674709
ENSG00000169413.2	RNASE6	111.984	2.66218	5.75776	2.1628	0.00652043	1.32013	4.07557	2.14973	1.42466	1.87852	2.2328	1.37443	6.92264	4.84424	1.80355	1.44295	2.6965	2.66459	0.737856	2.86457	2.29221	11.2509	6.28018	2.5948	1.32184	3.98263	9.00912	12.7223	10.4679	3.92047	2.76215	4.62546	2.3209
ENSG00000115896.15	PLCL1	37.2991	1.13942	1.76983	1.55327	0.0106481	0.633642	1.20264	0.81081	0.811148	0.973311	1.1478	0.525742	2.35134	1.22673	0.81877	1.43798	1.26338	0.759916	0.50478	1.1233	1.27326	1.80009	1.80366	0.490824	1.60022	2.25584	1.91818	3.13836	1.1813	1.4535	0.731473	2.01235	2.04873
ENSG00000119689.14	DLST	539.365	16.9727	22.1211	1.30333	0.0108452	17.6621	9.93814	19.8085	18.0059	17.2552	20.3058	18.2862	17.8037	19.2881	21.2986	8.42962	18.8636	20.9585	10.2088	14.9781	16.8958	21.3164	19.9042	14.6946	20.4316	18.6771	18.4367	25.3997	29.7357	18.6497	24.9266	23.9217	33.284
ENSG00000240849.10	TMEM189	365.203	14.9129	11.1007	0.744365	0.022435	18.9188	9.25324	9.55144	16.3145	16.6627	9.82202	17.2429	6.05322	16.5255	13.0807	16.1744	15.0676	22.0186	20.2684	15.2403	12.7521	11.5662	11.0403	11.0751	7.90701	10.1822	10.1336	8.74304	10.5825	11.9056	10.2726	12.2211	14.6274
ENSG00000047648.21	ARHGAP6	13.0402	0.437161	0.714061	1.63341	0.00390647	0.333066	0.219362	0.341861	0.191701	0.483565	0.159059	0.22604	0.567004	0.464434	0.329358	0.32701	0.530303	0.234434	0.264761	0.385454	0.376144	0.639808	0.654621	0.332528	0.279503	0.684761	1.41592	1.19599	0.70428	0.263768	0.446008	0.555712	0.433748
ENSG00000180549.7	FUT7	8.73329	0.297839	0.543516	1.82487	0.00329726	0.203268	0.0956253	0.133741	0.292485	0.301824	0.107859	0.0940575	0.617927	0.273496	0.158688	0.0311832	0.170337	0.210402	0.0504944	0.226193	0.27547	0.522461	0.326873	0.20294	0.232608	0.726793	0.828616	0.644035	1.07454	0.160976	0.340245	0.271318	0.158828
ENSG00000113319.12	RASGRF2	40.0037	1.15049	1.9651	1.70806	0.00430694	0.490105	0.368903	1.3737	1.15656	1.59293	0.988228	0.57452	1.57929	1.81644	0.867265	0.616529	1.5196	0.497159	1.60708	0.708991	0.880054	1.81002	2.0579	0.990857	1.32734	1.24858	1.57691	4.45149	1.9667	0.912111	2.54316	2.38776	2.09348
ENSG00000104894.11	CD37	113.501	2.8308	5.67991	2.00647	0.0288503	2.65084	2.61288	2.02651	2.76085	2.64491	3.04762	1.28502	9.36314	2.64028	0.952613	1.20062	3.86097	2.29963	1.00343	2.61268	3.35008	6.64271	6.20246	1.19725	2.11861	13.2017	6.13814	10.7986	12.8606	3.5988	2.46509	2.48523	1.4795
ENSG00000168282.5	MGAT2	321.108	9.84732	13.5537	1.37639	0.00719241	10.5557	7.67864	7.53679	8.26944	10.2879	13.6397	9.22611	8.75513	13.6766	10.8858	8.18668	12.2037	5.98917	7.96365	11.3546	23.5991	16.263	12.0847	6.83061	13.1232	12.0566	13.0627	17.8923	10.8502	10.3719	17.2872	10.6324	10.8445
ENSG00000050344.8	NFE2L3	234.86	11.0762	5.50131	0.496678	0.0267249	7.49938	39.0503	4.88001	15.8307	5.71052	13.0203	14.5098	14.9564	4.49077	16.5346	2.80665	10.2036	3.88982	3.77706	7.48313	4.36961	6.82286	10.1381	4.35043	2.16904	7.1824	4.12132	6.44072	3.95056	1.90898	6.48342	9.44628	2.83331
ENSG00000160593.18	JAML	106.112	2.65496	5.31445	2.0017	0.0363789	1.97775	1.91357	2.43886	2.3764	2.58347	3.34305	2.4813	8.10727	1.67594	2.32395	1.01343	1.81965	1.82345	0.866102	3.58026	2.36249	4.37731	5.59574	1.41984	1.2366	8.28351	9.51081	12.6187	11.8758	3.99637	2.32076	2.61264	1.57722
ENSG00000111786.8	SRSF9	662.764	25.9565	21.2475	0.81858	0.00580937	29.6947	21.9443	24.9959	25.3542	25.4139	30.9674	23.6943	19.4757	23.3032	31.1408	33.9397	21.2199	21.5787	24.4645	30.6603	22.5452	17.517	19.3764	23.3555	29.4322	24.7671	22.8142	16.0512	18.5405	17.2206	16.5553	27.3394	19.4025
ENSG00000105383.14	CD33	20.2802	0.580933	1.10509	1.90227	0.00297893	0.11721	0.392872	0.474277	0.303578	0.493112	0.536422	0.27118	1.01549	0.677414	0.137255	0.72823	0.773487	0.363969	0.283884	0.64562	0.367324	1.26055	1.22514	0.438825	0.53651	1.02152	0.985464	2.78525	1.66872	0.730978	0.662154	0.880025	0.503713
ENSG00000123643.12	SLC36A1	141.689	4.51082	5.90977	1.31013	0.0108722	4.23909	3.73476	4.77285	5.26232	5.23916	4.59187	2.46062	4.65139	4.16039	3.46604	4.01732	6.33742	3.84782	4.69196	4.68925	8.44727	6.77972	5.92942	7.77579	4.82225	4.84306	3.82347	8.15933	5.67765	3.5756	5.26928	6.32786	4.09628
ENSG00000160007.18	ARHGAP35	617.525	24.821	19.0776	0.768608	0.0104789	25.6745	27.9837	16.0792	20.8218	14.7267	16.0482	20.2952	22.1795	29.4124	32.0407	39.0239	25.8924	25.6634	23.7981	31.1758	20.1559	14.0593	18.92	22.8272	22.1823	15.3441	19.1837	20.2587	16.005	18.8468	16.1322	20.5432	22.2512
ENSG00000124588.19	NQO2	58.7877	1.90941	2.53435	1.32729	0.00735238	2.65092	1.82788	1.83587	1.81785	2.04684	1.2298	1.20562	1.89724	1.86214	1.71475	1.33157	2.05642	2.10736	1.52401	2.03289	2.44805	1.3156	1.8838	2.3366	4.33364	2.31545	2.65969	2.0158	2.67533	2.59121	2.15526	1.74392	3.17213
ENSG00000120280.5	CXorf21	67.0301	1.77009	3.32913	1.88077	0.0146939	0.849453	1.33205	1.63944	2.11863	1.58832	2.32881	1.6596	3.90214	2.66685	1.25262	1.17282	1.66095	0.937884	0.492368	1.44939	2.71807	6.12871	3.03554	0.918753	0.756049	3.41691	4.86436	6.87804	4.28638	2.13026	3.55469	1.88972	1.40123
ENSG00000127870.16	RNF6	601.887	24.9096	17.7726	0.713483	0.00857877	27.5069	18.0737	18.9358	12.9862	31.1861	26.9901	22.6512	18.8663	30.0448	27.2716	41.1692	32.6232	23.319	16.7156	23.8043	17.1753	15.438	17.5472	12.7666	7.6742	10.1095	29.6214	22.8486	17.753	22.2788	19.5968	20.4439	16.4899
ENSG00000105122.12	RASAL3	98.307	2.39806	5.01047	2.08938	0.0125702	1.68312	1.82115	2.00811	3.74581	2.25853	2.44114	0.848052	9.7784	2.3607	0.700791	0.79183	2.06864	1.53313	0.808342	1.62321	2.17959	4.46274	3.6489	2.29654	2.99609	18.5557	4.62313	8.92749	8.38525	2.35483	1.7217	1.87216	1.81197
ENSG00000153064.11	BANK1	97.2715	2.38303	4.94816	2.07642	0.0356698	2.16572	0.904892	2.18241	1.57455	1.65021	3.3795	0.975765	8.31626	1.16071	1.24581	0.642625	2.11336	2.79627	1.46532	3.67204	7.5692	2.72932	6.65985	0.896185	2.11962	7.9474	6.94498	8.30648	11.9349	3.28355	0.66779	1.74017	2.22663
ENSG00000204149.10	AGAP6	216.521	6.81743	9.00461	1.32082	0.00760393	7.42435	6.49017	7.04296	6.31413	7.04775	4.895	4.58913	8.82577	6.42468	5.66631	6.32379	3.83043	9.18749	6.19356	10.5059	10.3055	8.1623	6.77137	13.5663	9.95425	11.1434	10.0185	11.1765	7.58858	6.18677	7.5121	6.10123	7.27312
ENSG00000184497.12	TMEM255B	42.1648	1.2311	2.03833	1.6557	0.00971654	1.0812	0.356046	1.10026	1.65946	1.54596	1.09004	0.711535	1.49001	0.969829	1.14419	1.07259	1.14764	1.01469	1.23548	1.34751	1.50594	1.76491	1.01744	1.67314	3.71177	1.96514	1.80496	4.38992	2.32087	1.68394	1.36739	1.46721	0.525664
ENSG00000145016.15	RUBCN	341.193	10.5519	14.2857	1.35386	0.0208129	14.5342	9.16604	12.7513	11.7233	13.9146	9.52967	7.21449	12.9522	11.7633	6.15734	9.55177	10.7572	8.96348	5.66569	12.1334	13.5605	10.6339	13.2389	20.5789	18.0743	17.0621	15.2175	13.6326	14.9319	19.0281	14.4099	6.24735	7.79876
ENSG00000100368.13	CSF2RB	228.761	5.91717	10.9849	1.85644	0.0268106	6.09284	4.69482	5.98555	6.62065	7.0019	8.86286	4.66646	11.2196	6.42468	7.65427	2.69128	4.44553	3.21858	2.79222	4.88627	7.37914	17.4368	7.18882	3.1726	6.05066	17.4188	17.2209	17.0117	21.3043	11.4805	9.37807	3.26005	3.20121
ENSG00000163625.15	WDFY3	330.845	10.8902	13.0994	1.20286	0.0118155	10.7505	7.70342	12.285	9.40692	12.8166	10.1026	8.61288	10.8305	9.94422	9.5766	11.3437	10.0663	13.5146	12.749	12.1501	10.4552	10.0874	10.4283	8.90534	14.4892	12.3533	16.1186	16.6085	14.0242	14.5967	13.5266	14.6406	12.7584
ENSG00000152404.15	CWF19L2	492.946	15.2317	20.5593	1.34977	0.00956237	10.1206	12.5583	9.14872	17.6441	12.027	13.8536	15.6555	24.6427	13.7428	14.5424	12.3532	22.9233	13.4212	18.5095	15.8321	15.5873	23.632	24.9495	31.1914	22.0998	19.7322	25.6891	23.8043	14.8379	10.4542	15.5494	21.291	17.153
ENSG00000159433.11	STARD9	82.8347	2.29141	3.94335	1.72092	0.00343459	1.49664	1.87356	2.54692	2.90545	2.54455	1.69598	0.966419	5.79383	2.52569	0.943965	1.08184	2.31703	1.07654	3.13812	1.96464	1.38082	3.7027	3.36308	3.96349	5.66051	4.90913	3.7485	8.70698	3.46215	2.17965	2.29288	3.52135	3.07224
ENSG00000088727.12	KIF9	21.5189	0.694774	1.06902	1.53867	0.00448841	0.448928	0.61246	0.413522	0.878516	0.622154	0.643169	0.540099	0.582281	0.384382	0.630847	0.440765	0.827635	0.353159	0.624508	0.919185	0.730066	0.570867	0.577531	1.5463	2.0549	0.963094	0.627442	0.663778	1.12187	1.59985	0.601158	0.838907	0.701559
ENSG00000228439.5	TSTD3	68.7012	1.9059	3.30098	1.73198	0.0059135	2.00197	2.05485	0.934017	2.04265	1.8016	0.434573	1.26323	2.76632	1.66961	0.852496	0.753842	2.74523	2.26062	2.71263	2.79482	1.66485	2.43743	1.75601	2.18044	6.87282	6.3447	2.54368	1.92214	3.67348	2.16196	2.58945	2.91512	4.55065
ENSG00000164081.12	TEX264	104.31	3.3796	4.3397	1.28409	0.00583558	4.49401	2.69338	2.32092	3.37498	2.58996	4.01792	2.33587	4.09848	2.15737	4.08513	3.41405	2.97922	2.98221	3.21147	4.4391	3.30586	3.79758	3.58038	4.47138	7.04476	4.45736	3.50888	4.25864	4.7706	4.78999	4.07034	4.00586	3.05452
ENSG00000105722.9	ERF	448.894	18.8965	12.9421	0.684895	0.00483385	19.1819	12.9735	11.1804	31.8828	18.1993	13.6181	14.654	14.6669	22.189	23.0226	17.5094	34.6644	13.4971	15.4435	19.2639	13.9698	13.068	10.0257	8.59405	16.4174	12.6817	8.1227	16.7232	14.0957	15.7169	18.5	12.1813	6.85058
ENSG00000232653.8	GOLGA8N	16.7385	0.559422	0.857475	1.53279	0.00860308	0.115155	0.406301	0.290943	0.755583	0.239384	0.274967	0.458253	0.630119	0.549334	0.503438	0.307385	0.694793	0.786697	0.171636	0.707344	0.50719	0.383221	0.814789	0.724304	1.2387	1.04994	1.43845	0.948628	0.664089	0.437739	0.38551	0.714736	0.539874
ENSG00000176715.16	ACSF3	135.968	4.08732	5.95829	1.45775	0.0198085	4.6591	2.89895	2.4114	6.17324	1.18562	2.7741	2.7489	6.42272	3.83248	4.26376	3.73727	5.87149	2.8787	3.65066	6.30143	2.08574	2.90674	4.38492	8.03562	7.55196	7.93327	6.36635	6.67891	5.45662	6.72971	5.15239	7.70965	5.16595
ENSG00000115523.16	GNLY	88.8347	1.83603	4.93033	2.68532	0.0423928	0.68862	0.364448	1.01943	4.013	1.33493	2.37508	0.902821	1.04669	4.25364	2.55358	0.581023	2.95742	0.890986	1.41126	1.64751	0.972105	30.9977	3.32208	0.988291	1.51036	5.07826	3.20816	5.51517	4.09531	0.954352	2.06519	1.66597	2.42131
ENSG00000250305.8	TRMT9B	16.6279	0.504962	0.911808	1.8057	0.00815797	0.0835541	0.109498	0.169636	1.05113	0.206777	0.152008	0.729068	0.798289	0.258424	0.400695	0.0769077	0.735186	0.0889576	0.257966	0.956338	1.37093	0.51833	0.345503	1.2781	0.68296	0.576162	0.432708	0.945474	1.03253	0.708961	0.109889	1.38611	1.16584
ENSG00000071282.11	LMCD1	67.8566	1.88316	3.26225	1.73233	0.00457424	1.24647	1.75917	1.72604	1.02647	2.75253	1.41948	0.922842	3.01972	3.23697	1.45217	1.05907	1.22934	0.595487	2.71531	2.58632	1.93611	2.09351	4.29669	3.64722	1.84334	1.54274	2.19441	6.8455	3.60798	1.93629	5.89018	2.1885	3.08671
ENSG00000109610.5	SOD3	95.1584	2.30268	4.87832	2.11854	0.00166917	0.987303	2.96097	1.68896	0.497225	2.19901	2.29199	0.951773	4.75215	1.99262	1.79847	1.70394	5.17095	1.73732	2.32996	1.97757	3.70737	3.77311	2.2492	2.40266	5.27245	2.6476	7.22291	11.7306	9.07432	5.08223	2.47893	4.61241	1.86434
ENSG00000003756.16	RBM5	497.115	15.385	20.7032	1.34568	0.00917454	12.0571	12.1308	11.4195	20.8773	14.9109	16.2364	14.5496	23.3266	12.6349	15.1739	12.5125	15.4316	13.5815	15.1519	19.2798	11.3223	14.2959	20.457	19.0807	25.8171	34.0538	20.0098	28.1966	23.3357	23.2694	16.027	17.9363	14.0393
ENSG00000130052.13	STARD8	33.0217	0.959687	1.64818	1.71742	0.00715912	0.630017	0.288975	0.920237	1.11504	1.30968	0.727104	0.553898	1.80031	1.02878	0.688582	0.724877	0.752327	0.841246	1.00945	0.50477	0.843129	1.87928	0.827383	1.41525	1.62215	2.28081	1.23826	3.62633	2.56599	0.972921	1.3973	0.473026	0.984555
ENSG00000196358.10	NTNG2	13.9483	0.447344	0.772164	1.72611	0.0105196	0.245494	0.267726	0.431707	0.231214	0.331385	0.42632	0.361443	0.651308	0.327581	0.226499	0.225966	0.504953	0.152466	0.349271	0.476824	0.219276	0.670242	0.610107	0.384357	0.689552	0.807949	0.497124	1.29637	1.64097	0.185579	0.933921	0.558546	0.244137
ENSG00000119684.15	MLH3	256.078	7.76659	10.9522	1.41017	0.00718545	10.0908	5.27402	5.5869	5.15121	4.94266	8.31487	6.49049	10.7046	9.84866	9.10352	5.44376	9.89458	12.4299	4.11887	7.60392	6.70987	6.89902	11.0087	9.78187	9.43909	9.26328	9.857	17.9316	9.14544	8.23169	12.9309	16.2215	13.6591
ENSG00000197863.8	ZNF790	116.116	3.06881	5.60644	1.82691	0.00851764	1.22753	5.13312	0.897393	5.69143	2.34026	2.53304	0.378673	4.14625	1.23455	0.283944	1.86221	2.91453	5.50597	2.64276	7.74047	5.79162	4.40979	5.38577	7.35325	11.1856	5.79113	8.47895	3.21707	3.47397	6.2108	2.81573	1.50194	5.96808
ENSG00000119408.16	NEK6	347.542	9.73397	15.7179	1.61475	0.00577879	8.08252	6.96162	10.9174	11.288	11.2366	9.96506	6.25166	14.5255	10.3516	7.08317	6.40023	20.4687	5.68409	9.18274	6.11067	8.52384	30.4061	22.8941	9.67148	14.4631	14.6622	16.924	25.9853	18.4503	7.1539	12.6338	9.71749	11.5474
ENSG00000198055.10	GRK6	285.553	8.38902	12.5014	1.4902	0.00661343	8.36211	6.04264	5.84045	10.6556	7.30268	8.2236	5.41339	13.1258	7.87779	7.03033	8.86258	5.55874	12.6838	9.43753	7.91835	14.5196	12.8404	8.87847	14.901	13.4795	25.4968	12.4318	11.1668	16.8087	7.64108	8.1089	6.11741	8.82708
ENSG00000122679.8	RAMP3	90.801	2.22449	4.63336	2.08288	0.00594491	2.33115	0.69263	2.27646	2.01259	1.51817	2.34371	2.15737	3.43141	2.79138	2.68195	2.03278	2.31334	1.60018	1.55439	2.12986	5.3623	7.61834	3.22256	1.92928	6.87968	7.23839	4.76929	8.68181	5.39511	3.64367	1.74565	1.10543	1.34216
ENSG00000181374.7	CCL13	77.5338	1.3504	4.62137	3.42222	0.00736069	0	0.435539	2.11169	1.5986	2.0366	2.12878	0.666398	2.75189	4.75622	0.481845	0.284056	0.258608	0.511097	0.459968	0.274727	2.36993	21.3749	1.32337	2.15674	2.58976	2.20685	2.60589	1.95557	5.63571	1.22198	11.881	3.29536	0.160757
ENSG00000004776.12	HSPB6	78.0878	1.39528	4.6122	3.30557	0.000473227	0.203465	0.789673	1.24499	0.351322	1.25882	1.13361	0.470743	2.28854	3.13581	0.635368	1.59188	2.30178	0.252727	0.985595	2.78486	2.4127	1.32118	1.52688	1.82823	4.54025	2.3189	13.5965	10.6369	8.65357	4.7131	1.3623	2.64792	3.10015
ENSG00000168291.12	PDHB	167.876	5.57229	6.69936	1.20226	0.0104313	3.30343	4.76695	3.86834	5.51175	4.59281	5.87901	5.6506	7.19885	6.48324	5.30275	6.85001	4.85221	6.52369	5.4769	5.82375	6.50145	6.16099	9.01283	7.30953	5.26686	6.7684	6.12793	6.19371	6.39479	5.11464	5.9023	7.46865	7.56961
ENSG00000149451.17	ADAM33	87.5895	2.04095	4.59809	2.25291	0.00509844	1.47052	0.952975	2.97368	2.40959	4.53041	1.21821	1.27757	1.29548	1.99326	1.03087	0.538655	4.37586	0.782809	2.66144	1.60297	1.61665	1.70512	2.38081	5.32576	11.2299	10.5426	5.16437	7.09972	4.04547	2.78068	3.64196	1.65237	1.28972
ENSG00000213853.9	EMP2	877.691	37.8225	24.0887	0.636886	0.00738218	51.4923	53.2143	19.4159	24.2911	33.2494	53.5642	31.1124	42.6501	55.4919	58.1822	26.9608	32.0092	23.5357	20.8183	39.8504	35.8506	6.67514	24.1566	17.534	11.6976	27.5468	19.1305	26.4914	24.828	30.4409	10.9084	52.8348	23.7579
ENSG00000153823.18	PID1	85.8745	2.0073	4.505	2.24431	0.0310556	1.35319	0.220359	1.47932	0.76387	2.47297	2.11267	2.31196	2.6264	1.68065	2.11282	0.814396	3.20562	0.646468	4.65437	2.15445	1.88674	1.30957	4.77056	2.06547	0.476464	3.21007	8.88809	3.353	2.66377	1.97841	4.05098	6.30436	16.3075
ENSG00000101347.9	SAMHD1	372.604	10.3682	16.9139	1.63133	0.0115137	6.12576	11.0262	17.6829	14.1747	8.4033	10.3701	6.38853	16.1927	18.3081	7.18556	7.26992	13.5043	4.97282	5.71223	6.70589	5.15166	32.4198	14.0011	10.4311	12.0628	22.7645	18.2057	26.4696	19.8377	9.23456	21.6396	14.008	12.355
ENSG00000172578.11	KLHL6	87.8164	2.1887	4.44506	2.03091	0.00426393	3.78519	0.679478	1.30422	1.87763	2.06248	4.08308	1.09085	5.96538	2.11394	1.65897	0.82518	1.39817	1.28883	0.791823	2.40532	2.90233	3.87412	4.95674	2.68513	1.34886	5.85438	7.78036	12.5541	4.15275	3.07652	3.25133	2.6093	1.43991
ENSG00000087510.6	TFAP2C	551.125	22.9995	16.0717	0.698784	0.03483	28.9569	6.16711	20.3097	19.1146	17.3314	20.4508	35.8299	11.8669	19.413	26.7909	29.7104	22.6301	28.0795	21.7535	35.0883	17.1143	17.4031	13.1794	25.0855	17.8684	13.0462	11.4004	9.4147	13.188	13.9807	18.3836	17.673	19.8946
ENSG00000135766.8	EGLN1	338.09	14.4139	9.59086	0.665388	0.010559	15.2308	26.9714	5.77483	8.71776	8.95795	17.4359	15.8461	7.98544	15.1221	16.0483	20.4077	10.3601	13.9194	14.7629	17.1684	7.44637	8.14709	13.4863	9.29332	8.74218	6.26873	16.0096	8.24648	7.99128	11.2221	7.42242	14.3788	4.72647
ENSG00000033100.16	CHPF2	341.036	10.6323	14.1809	1.33376	0.0128103	17.071	6.25819	10.8648	9.45402	13.2304	8.51695	5.58723	13.2143	8.73939	10.7917	10.4818	10.5197	9.54186	13.6218	10.0912	11.6943	14.5151	12.4537	12.2525	20.0115	20.4886	15.7485	17.1937	13.5365	7.32013	16.1342	9.50344	12.2001
ENSG00000198732.10	SMOC1	61.2793	0.454776	4.40443	9.68483	0.0270103	0	0	0.0790996	0.172987	0.0793382	0.0318959	0.148345	0.0974577	0.132346	0.250279	0.0368859	3.92902	0.223992	0.0597288	0.0802676	0.733157	4.4887	0.214806	0.150033	0.0917157	0.214927	0.38506	0.423231	0.202214	0.190415	0.167695	1.1634	47.5323
ENSG00000198837.9	DENND4B	245.256	7.32718	10.6268	1.45033	0.00498487	9.64981	5.31073	4.71171	8.80949	5.72458	7.86434	6.22781	9.61458	5.58262	8.77701	4.29236	8.58945	7.67058	5.91829	9.66429	8.61141	8.41339	6.89264	11.5126	16.881	20.8939	8.63104	12.3371	10.4842	7.65119	6.99429	8.85141	8.69456
ENSG00000159210.9	SNF8	226.957	7.37594	9.16292	1.24227	0.0152167	7.50825	6.86898	5.56086	9.20706	6.75827	7.43041	5.47273	9.41268	7.6194	9.70012	6.6052	5.80465	7.55168	8.07129	5.56755	9.43233	6.74144	8.95749	10.1247	12.5838	10.8691	8.47403	5.12273	8.23839	6.82745	9.81516	10.1438	10.4874
ENSG00000162894.11	FCMR	84.3114	2.01956	4.37062	2.16414	0.023121	0.969362	1.05237	1.82507	2.12443	1.88225	1.66179	0.621068	10.9712	1.09449	1.04783	0.205904	1.68712	1.06513	0.444557	2.14078	2.65263	3.41959	4.99621	0.670012	1.10928	5.39894	7.65346	9.21398	12.5243	4.25173	0.811295	1.4183	1.39834
ENSG00000167515.10	TRAPPC2L	90.7007	2.91834	3.82505	1.3107	0.0105514	2.74607	2.57449	2.26106	4.33521	2.44652	2.81017	2.34168	2.90985	2.80711	3.36885	2.87067	1.57796	2.2902	3.21589	3.71931	4.13351	2.41997	2.54441	3.61308	5.20747	4.52361	3.15267	2.81735	3.13899	3.68149	2.75795	4.94829	5.48687
ENSG00000198873.11	GRK5	104.226	3.083	4.67543	1.51652	0.0188742	4.60215	0.988383	3.54473	3.4766	2.83493	4.31995	2.71979	3.95379	2.47809	5.11587	1.4619	2.16932	1.10289	2.87051	3.1061	2.99131	5.80619	3.21768	3.83933	4.83709	7.51213	4.35876	7.18506	5.96794	2.0501	4.81463	5.08288	1.81754
ENSG00000186448.14	ZNF197	128.492	4.22876	5.22005	1.23442	0.012165	4.2949	3.72451	3.05395	4.37811	5.99313	4.20098	3.51978	5.64724	4.43376	2.04005	3.7032	4.09776	3.84038	4.18407	4.81958	3.75174	3.75907	5.18686	4.64959	6.80969	6.07093	4.89305	6.12084	4.70001	6.14691	4.61229	4.94708	4.91257
ENSG00000239264.8	TXNDC5	203.819	5.1467	9.95529	1.93431	0.0116446	5.26802	2.81623	3.43459	10.3367	6.69632	5.94006	3.04706	6.47861	6.98557	1.65129	5.76733	3.06009	4.53583	2.9147	6.7681	12.8723	9.96095	5.07002	7.11228	20.4144	14.8226	22.8171	8.64063	6.70321	6.11568	7.81595	2.4371	3.33668
ENSG00000141506.13	PIK3R5	72.0282	1.94819	3.5081	1.8007	0.00733654	1.65612	1.06989	2.0074	2.59781	2.40137	2.04221	1.41393	4.86434	2.17408	1.36574	0.837334	1.52464	1.01406	0.573642	2.18032	1.46991	4.7616	3.00076	2.2007	2.16208	5.62959	3.61666	6.55288	6.42317	1.71793	3.65062	1.4244	1.69501
ENSG00000129993.14	CBFA2T3	85.1702	2.07728	4.37007	2.10375	0.0306848	2.31605	4.75821	1.1805	1.89831	1.05927	1.33006	0.732553	3.26189	1.45233	2.74649	0.674626	2.02682	1.93001	1.1798	3.11228	1.54949	1.7847	1.99578	2.3928	6.07232	7.70459	5.95417	7.33817	5.55815	9.89057	1.006	3.66861	0.595597
ENSG00000154175.16	ABI3BP	82.0712	1.87277	4.36767	2.3322	0.0122521	0.558195	1.86819	0.402943	0.647144	1.69715	1.01551	0.221393	7.25298	1.49819	0.112056	0.601871	1.14268	4.55625	3.4943	1.5227	3.02587	1.55986	2.95789	1.09866	2.04405	4.23404	10.351	13.7107	8.54201	3.61854	1.12122	2.331	0.884777
ENSG00000146192.14	FGD2	83.4161	2.00812	4.31494	2.14874	0.00756469	1.61874	1.38531	2.2638	2.40851	1.64501	1.93261	0.565758	5.93647	1.9147	1.25028	0.523075	2.25119	2.43846	0.705839	1.78213	2.02452	8.09299	3.26768	1.68919	2.28592	8.01216	4.24203	8.74806	8.09374	2.63888	3.27165	1.18951	1.23792
ENSG00000109445.10	ZNF330	330.367	10.7892	13.1791	1.2215	0.00679674	10.6319	9.74352	13.1366	11.5036	14.9668	10.1658	8.75319	11.3752	10.9696	9.48592	8.54704	7.81025	11.9198	9.62118	11.7081	13.6366	11.1233	13.3594	13.9577	10.9025	12.9596	10.1919	14.2182	10.6502	10.8255	20.4544	13.6154	14.1335
ENSG00000198718.12	TOGARAM1	157.084	4.95655	6.57968	1.32747	0.00725661	5.2487	3.69177	2.93314	3.67813	2.95211	5.43903	3.32765	6.94182	4.42736	3.25944	4.74492	8.01132	6.5195	4.36873	7.3046	7.29204	3.92136	6.59518	5.83144	6.61083	5.84943	6.10326	9.32287	4.71722	6.72081	5.91891	8.18867	7.16377
ENSG00000148803.11	FUOM	92.4822	2.56	4.37556	1.7092	0.00437217	2.45442	1.3471	1.02276	6.1216	2.83458	2.17061	1.95597	3.48195	2.35171	3.08709	1.75714	2.22818	1.86308	1.21942	3.00434	3.28004	3.09896	2.33891	5.92192	7.64587	8.95868	3.27556	5.76042	3.14542	3.72551	4.2225	2.18407	2.02436
ENSG00000131446.16	MGAT1	233.611	7.3942	9.65368	1.30557	0.0164668	6.20106	7.06537	6.72305	9.37546	7.05175	5.91071	5.12992	9.83928	7.62014	5.21891	7.07209	7.30036	9.59047	7.91251	7.40195	8.31147	14.4737	7.83155	11.0872	9.64034	11.6201	9.06985	12.2517	12.6254	6.73745	9.12662	4.87539	6.54712
ENSG00000170445.13	HARS	191.671	6.31038	7.67809	1.21674	0.0212069	5.17241	5.42774	6.75946	7.68005	6.75336	6.29955	5.51929	6.50645	5.00688	4.66461	6.45398	6.08129	7.67091	6.01463	7.14507	8.58081	9.82624	6.7402	9.48227	6.76093	8.57945	5.55044	5.98078	8.35722	4.15802	8.0422	7.99023	8.46641
ENSG00000205744.9	DENND1C	81.7254	2.02317	4.16753	2.0599	0.00988273	2.10534	1.67136	1.43963	2.79138	1.30256	2.24425	0.817629	6.60587	2.00038	1.46751	0.744003	2.03205	0.887259	0.504315	2.23401	1.87239	3.63131	3.92968	1.77351	1.54879	10.8379	4.23644	8.73526	7.75093	2.67959	2.80038	1.99472	1.08691
ENSG00000101331.15	CCM2L	22.3363	0.64995	1.18362	1.82109	0.024419	0.27071	0.0955144	0.400757	0.584292	0.736937	0.377067	0.626323	0.370326	1.01821	0.951025	0.685234	0.510419	0.294222	0.60523	0.722977	0.87131	0.604254	0.834373	0.912169	2.40083	1.36116	1.27104	2.35872	1.51238	0.964734	0.566418	0.271004	0.158644
ENSG00000173200.12	PARP15	81.7781	2.03948	4.15276	2.03619	0.0165234	1.3035	0.987127	1.99558	1.59199	1.82535	2.1256	0.82383	6.88134	2.18161	1.34028	1.47781	2.39777	1.42164	0.616019	2.12269	1.93884	4.56753	5.79419	1.40455	1.70993	10.785	3.8325	8.76365	6.96711	2.11493	1.2772	2.16424	1.3663
ENSG00000154767.14	XPC	409.814	12.264	17.5888	1.43419	0.00557609	10.7647	8.34296	8.19669	17.0752	14.5572	12.2275	8.57765	22.8959	11.8103	9.51486	7.03666	11.9716	13.6656	10.7417	15.081	12.0169	15.1499	17.1737	20.2195	21.881	33.2218	16.5275	17.6508	16.2037	21.7604	12.0023	13.8815	9.66581
ENSG00000172113.9	NME6	76.9852	2.58467	3.15501	1.22066	0.00965963	2.62936	1.63414	1.77126	2.72823	2.79385	2.01599	1.93105	3.38792	1.72611	2.73066	2.58673	2.7896	2.7566	2.22916	3.55939	2.29654	2.86843	2.8059	2.58296	3.42295	3.42848	2.7604	3.41387	3.52999	3.89713	2.62458	3.50157	2.58227
ENSG00000010295.19	IFFO1	89.9501	2.32503	4.4519	1.91477	0.00541179	1.51426	0.902329	2.12546	3.42811	2.78142	2.70511	1.10553	5.91265	2.7783	1.20843	1.33186	2.11489	1.5674	2.28204	1.61763	1.43649	4.6159	4.05843	2.49448	5.04444	7.98606	4.49734	10.5906	6.30687	1.99866	3.18242	2.62756	1.73536
ENSG00000176095.11	IP6K1	159.422	5.10809	6.58466	1.28906	0.0103785	4.17503	4.15786	4.45275	6.71483	4.84947	5.57413	4.00401	6.61207	4.55905	5.3622	4.46274	5.24796	4.89311	3.31212	6.74402	5.49831	3.88068	5.14364	5.89946	9.20853	8.03581	5.95579	6.57851	8.30074	9.55911	5.88947	5.32556	5.02492
ENSG00000107317.12	PTGDS	70.0772	1.307	4.09786	3.13532	0.0494069	1.03331	1.23047	0.841339	0.724837	1.18271	2.21032	0.597675	3.53387	1.20863	1.26045	0.326946	0.730609	0.802183	0.481289	1.94037	2.29745	1.28428	2.21554	0.193433	7.16866	3.98329	8.57496	10.9814	9.07819	4.67976	0.378357	0.581868	0.555088
ENSG00000186081.11	KRT5	33485.1	1464.19	886.541	0.605482	0.01164	1020.71	1416.48	3135.69	1879.77	1623.53	928.978	1861.95	417.459	1509.81	938.505	1916.86	956.652	1765.01	1769.26	820.698	947.261	909.342	957.643	896.556	624.166	749.222	703.28	262.846	1490.14	1737.99	1106.47	511.604	627.22
ENSG00000128805.14	ARHGAP22	41.4319	1.23787	1.97414	1.59478	0.00345556	0.800167	0.692145	1.41638	2.96385	1.30311	0.349256	0.824123	1.93029	1.06083	0.523923	0.487051	1.58981	1.10611	1.03874	0.982322	0.988194	2.82836	1.52195	1.43024	1.62456	3.70318	1.79252	2.64429	1.87929	1.71707	1.57701	1.44703	1.21012
ENSG00000017427.16	IGF1	68.8238	1.25753	4.05853	3.22739	0.0347566	0.970042	0.60846	0.808438	0.334993	0.928241	1.62996	0.648359	2.33289	1.97755	0.622665	0.327389	1.81545	0.803269	1.10846	2.44673	1.14663	1.48723	1.88345	0.871626	1.80076	0.867104	7.83336	8.53744	4.30438	3.35453	0.432994	18.5371	0.404247
ENSG00000143847.15	PPFIA4	86.0755	4.03887	2.17634	0.538849	0.00153445	5.73565	2.38008	2.31411	7.83267	5.25817	4.88102	3.73902	2.55511	3.75937	2.47824	4.31649	2.44856	2.17315	6.2369	2.97449	0.812741	0.893034	2.96813	7.2255	3.07537	2.20074	0.354499	1.10485	1.24819	0.428517	2.06809	3.35846	1.25431
ENSG00000088827.12	SIGLEC1	75.8212	1.77419	4.00065	2.25492	0.00424541	1.28769	0.67367	2.94489	3.56519	1.59337	1.59039	1.36634	2.59169	3.14472	1.02261	1.25679	1.45117	1.06171	0.628728	0.933866	1.19598	8.06417	2.55865	2.9425	5.48773	5.83462	2.68603	7.0578	6.17767	1.45054	4.08789	0.66677	2.49807
ENSG00000105792.19	CFAP69	33.3235	1.07745	1.53552	1.42515	0.00415241	0.65136	0.527231	0.801666	0.926224	1.29905	1.61631	0.87761	1.91022	0.787355	0.553374	0.290956	0.79467	0.761472	0.728127	2.13609	1.07095	0.948537	1.97166	1.54926	1.29345	1.64397	1.23837	1.55794	1.5053	1.41096	1.73164	1.70688	1.03288
ENSG00000123353.9	ORMDL2	182.826	7.31058	5.84364	0.799341	0.00903055	6.60451	8.35377	10.1585	5.16406	9.46752	8.13307	5.5932	5.30347	6.79049	7.92861	9.49149	7.127	5.8818	6.1292	6.03202	7.70499	6.04345	6.07847	4.33886	4.3493	4.59483	5.19774	5.39594	6.24314	5.77313	5.16253	7.79678	5.98822
ENSG00000114026.21	OGG1	79.1678	2.51908	3.39859	1.34914	0.00592687	2.26546	2.34844	1.51167	2.38859	2.43112	2.68079	1.50285	4.60751	1.70677	2.19119	1.55932	3.17526	2.10424	2.0917	3.72119	2.12601	2.70127	3.44961	3.31763	3.00541	4.75798	3.06473	4.61586	3.04939	3.66759	2.24841	4.21471	2.66308
ENSG00000139620.12	KANSL2	359.059	14.4257	11.1903	0.775717	0.00766061	15.4606	18.7548	10.4105	16.3388	11.2352	12.4702	12.346	11.8835	11.043	17.479	15.5158	14.624	15.3181	9.98042	22.0259	9.03958	8.79266	13.3317	10.4151	14.2602	11.1623	12.8503	10.2667	7.26845	10.9948	8.39553	17.1338	10.2623
ENSG00000164406.7	LEAP2	29.7783	0.972886	1.38346	1.42202	0.0179166	0.582392	0.667826	0.373607	0.879913	1.15303	1.39063	0.943209	1.01801	0.614418	1.02299	0.368545	1.09809	1.49201	0.759537	0.729083	1.0359	1.12269	0.97556	2.07142	1.2496	1.46416	1.17645	1.84525	1.25948	0.432392	0.792066	1.89483	1.3652
ENSG00000091106.18	NLRC4	12.1948	0.402442	0.689087	1.71226	0.046408	0.0483117	0.477282	0.286081	0.208549	0.334768	0.115359	0.357682	0.38185	0.531844	0.188581	0.377984	0.668	0.0900131	0.180019	0.290305	0.343729	0.784269	0.466137	0.253227	0.386995	0.906887	0.75963	1.17354	1.18409	0.229559	0.566074	0	0.603991
ENSG00000135437.9	RDH5	25.7993	0.826669	1.2461	1.50737	0.0257422	0.763011	0.869764	0.463408	0.658744	0.90056	0.607305	0.24443	1.07055	0.559978	0.824775	0.351158	1.03287	0.9842	0.393663	1.17563	0.874953	0.595497	1.03822	1.05477	1.47763	1.88874	1.23048	1.54969	0.846196	1.67333	0.343857	1.82146	0.504473
ENSG00000102119.10	EMD	383.816	15.7474	11.5697	0.734704	0.00505091	16.2947	14.312	14.7815	14.3673	14.4572	13.8663	11.6309	11.9622	13.231	12.721	25.7289	26.8013	10.3891	15.2439	18.9233	12.8033	16.1456	6.64376	17.3284	8.82744	12.5512	11.6976	8.69624	9.93436	12.0464	9.50284	11.2799	11.6487
ENSG00000103363.14	ELOB	751.502	30.658	22.6486	0.73875	0.0059017	23.903	23.22	22.1812	44.3553	24.3531	19.1487	38.9992	29.7262	28.9908	42.0471	43.146	30.6311	35.8597	23.8283	27.9805	41.9116	21.6062	20.7998	21.2687	19.0051	13.9437	24.8797	17.3763	22.4896	27.4726	26.3706	18.1798	17.8282
ENSG00000138061.11	CYP1B1	69.8626	1.41399	3.9579	2.7991	0.0145148	1.71763	0.287607	0.275825	0.754023	0.878963	0.764658	2.0476	6.84992	1.52765	0.386368	0.93788	0.585502	1.17523	0.607478	0.913556	0.680567	0.968821	2.66847	0.893758	2.23207	1.132	18.666	11.284	4.23918	1.27956	1.6812	1.51549	2.91169
ENSG00000153162.8	BMP6	73.7321	1.68341	3.94469	2.34328	0.000697016	3.52683	0.5333	0.845319	1.57681	1.40272	2.75699	0.757693	2.64206	2.07993	1.13083	0.550708	0.791639	0.821386	0.844819	3.49007	5.1423	1.55912	1.55289	7.78106	1.58553	4.39108	7.56442	4.72251	3.76814	2.01996	2.26651	2.01752	5.60995
ENSG00000170370.11	EMX2	24.916	0.772328	1.24086	1.60664	0.0183662	0.429385	0.681748	0.720413	0.602401	0.292222	1.11072	0.397375	0.946351	0.807516	0.586624	0.148211	1.14693	0.433343	1.27998	0.501701	0.254583	0.566347	1.35221	1.40664	2.33397	1.79916	0.726718	1.64389	0.928585	0.765104	0.853499	1.23582	0.96459
ENSG00000216490.3	IFI30	36.4796	1.0017	1.8657	1.86253	0.0229562	1.62309	1.04575	0.835759	0.913884	1.04785	1.12336	0.718391	1.75912	0.673283	1.10184	0.454688	0.266113	0.613584	0.73627	0.612516	0.62163	2.43436	1.3996	0.264206	1.21132	3.21711	1.07877	4.02463	3.40834	1.34127	1.71279	1.41291	0.82711
ENSG00000119865.8	CNRIP1	34.1514	1.01086	1.67603	1.65803	0.00641985	0.29608	0.731259	1.50001	0.25562	1.34333	0.628425	0.570849	1.62012	1.68403	0.500813	0.613187	1.05448	0.643589	1.39745	0.823678	0.652028	1.30174	1.56062	1.0346	1.07292	1.05864	1.70267	3.59604	2.13433	1.40686	2.5606	1.482	0.925393
ENSG00000104714.13	ERICH1	270.477	7.92903	11.8724	1.49734	0.0170435	9.86477	7.45657	6.75112	12.0446	7.68028	4.62791	4.69796	9.01843	8.12498	7.65911	4.82171	4.435	7.60234	10.9201	11.7305	8.95928	10.7247	13.4704	21.4994	10.4853	16.7268	14.9857	18.1373	10.3423	5.62399	8.30139	8.97443	4.8105
ENSG00000151694.13	ADAM17	429.666	17.206	13.4135	0.779585	0.00982449	22.1987	13.642	12.0296	14.3282	21.5877	19.3539	15.6378	14.3779	20.7084	15.4611	27.1114	17.3604	11.703	16.0943	14.9954	16.4104	11.0317	16.8841	16.2075	8.55461	13.5611	14.547	13.8295	10.5664	11.0472	9.55527	14.7065	16.1747
ENSG00000010671.15	BTK	62.298	1.67495	3.07491	1.83582	0.0152569	1.10981	0.70213	1.70716	1.48678	1.59108	2.65	0.991658	4.4208	2.14858	0.717028	1.03914	1.2507	1.61618	0.94115	1.252	2.17823	4.5972	3.48728	0.802355	0.919653	4.10499	4.14523	6.10303	4.91047	1.31835	3.07478	1.4175	1.61474
ENSG00000188257.11	PLA2G2A	59.208	0.753321	3.90063	5.17791	0.00057256	0.103906	0	0	0.179414	0.822857	0.413511	0.0480801	0.505392	6.13871	0	0.0956407	0	0.77438	0.232304	0.485623	1.0561	0.337352	0.389877	9.10302	10.8203	2.50776	1.86068	13.7173	5.69256	1.48117	0.173926	1.45626	0.811893
ENSG00000144559.10	TAMM41	101.11	3.15003	4.35845	1.38362	0.00809274	2.51172	1.79327	2.44972	3.92879	4.34383	3.38681	1.9006	5.22809	2.14698	2.44531	2.39352	2.52576	3.46854	2.90684	4.32072	2.44279	3.13001	4.79936	4.64655	4.19304	7.40912	3.5234	5.5863	3.45081	4.63349	3.21505	5.23597	3.09396
ENSG00000168874.12	ATOH8	8.93138	0.294947	0.562091	1.90574	0.0209143	0.201707	0	0.0568773	0.0995105	0.242457	0.32109	0.293339	0.350389	0.116312	0.112478	0.185662	0.181102	0.429503	0.0644228	0.269346	0.507658	0.0935547	0.339808	0.107883	0.29677	0.849998	0.956497	1.09558	0.851648	0.444988	0.241166	0.0865397	0.135093
ENSG00000147443.12	DOK2	72.9521	1.74151	3.81765	2.19215	0.011016	0.791867	1.22933	1.68807	2.05097	1.80291	1.70174	0.952685	4.91077	2.23745	1.36003	0.728876	1.59259	1.62292	0.472103	1.48037	1.18045	7.23081	2.50433	2.13458	6.97747	7.43229	2.80146	6.35601	5.76537	0.940663	2.65097	1.42691	0.928114
ENSG00000143110.11	C1orf162	73.6601	2.14308	3.40876	1.59059	0.0158392	1.51805	2.14245	1.44827	2.23895	1.97233	1.71171	1.28781	4.11487	3.20305	1.87644	1.57196	3.3393	1.96416	0.989895	1.26694	2.12156	4.51793	4.00078	1.79977	0.868582	2.37468	4.19919	6.88067	4.51402	2.47954	3.22922	2.46951	3.55848
ENSG00000118777.11	ABCG2	19.6837	0.595557	1.04233	1.75018	0.0379175	0.347109	0.342916	0.315166	0.11987	0.670029	0.773571	0.481849	0.569806	0.534965	0.433572	0.431322	0.349049	0.970086	0.49149	0.602558	1.91689	0.633914	1.58151	0.649777	0.35749	0.558495	1.50089	1.79631	0.750655	0.164933	0.871524	1.25095	0.216977
ENSG00000155229.20	MMS19	264.897	8.70852	10.5438	1.21074	0.0129433	6.37586	7.64649	8.44911	9.7687	7.49675	7.79082	9.01705	11.5384	6.51365	10.6795	8.92701	6.4717	10.7825	9.43614	8.23411	8.58988	10.2166	7.01179	11.3639	11.5779	13.7666	8.3281	10.5274	11.6737	8.9607	9.74544	10.4881	13.519
ENSG00000242419.5	PCDHGC4	22.5037	0.719085	1.11673	1.55298	0.0123955	0.56319	0.298065	0.819847	0.820511	0.836257	0.280163	0.244315	1.26265	0.581243	0.302275	0.242995	1.15037	0.349774	0.970581	0.564035	1.78884	0.742832	0.792451	1.18606	1.4098	1.69906	1.07617	0.78068	1.1672	0.459949	0.972168	0.317138	0.825114
ENSG00000198795.10	ZNF521	100.327	2.81997	4.67904	1.65925	0.00837647	1.20979	1.25077	3.86515	2.13752	4.28899	2.44086	1.66638	4.44746	4.67681	1.4716	1.76097	3.60722	1.25807	4.445	2.27293	1.86828	2.93445	5.41407	3.89737	5.8274	3.9987	6.62334	10.1919	5.82072	2.90765	4.70938	3.07	2.26431
ENSG00000042062.11	RIPOR3	92.6452	2.45031	4.51466	1.84248	0.0158415	1.68992	0.699056	4.48589	3.42108	4.9609	1.97121	1.07858	4.28698	1.77483	1.09183	0.844794	2.5637	2.11717	2.32336	1.94535	1.51034	4.09135	3.96698	3.86163	5.70151	9.80584	3.4487	6.36983	7.58227	1.97286	6.07198	1.25423	1.75302
ENSG00000166928.10	MS4A14	51.3519	1.44013	2.50384	1.73861	0.00382698	1.09262	0.555133	1.0007	1.3961	1.38444	2.2611	1.61787	1.75376	1.39527	1.12595	0.82468	1.92278	1.03144	0.814263	1.9259	1.09574	2.00429	2.34271	2.84713	1.05028	3.75044	1.3553	6.55446	2.17386	2.28436	2.23127	1.75009	1.80994
ENSG00000073711.10	PPP2R3A	364.607	15.7228	10.1204	0.643673	0.0177301	20.5755	18.0821	21.2458	7.17496	6.07053	14.0296	15.0721	6.95438	28.5204	10.6912	20.1726	12.2717	20.6039	13.3524	19.525	8.37883	10.0367	15.1126	11.6763	3.22119	6.61996	17.1634	8.75353	7.3275	9.71302	9.23656	16.8629	6.16203
ENSG00000178917.16	ZNF852	73.1702	2.355	3.12656	1.32763	0.00910917	1.87588	2.15106	1.03367	2.4293	2.74672	2.27071	1.30203	4.22941	2.02205	1.15937	1.94249	2.70182	2.86403	1.83484	3.26162	2.30386	1.96669	3.20511	4.09684	2.77274	3.30123	3.14071	4.00362	2.56364	2.59976	2.87831	3.79495	2.71776
ENSG00000174348.13	PODN	73.7524	1.79512	3.81736	2.12652	0.00508336	0.929005	0.32778	0.592433	1.20308	1.09648	0.824743	0.281072	6.90827	4.6415	0.278946	1.11822	2.3355	0.621348	2.50304	1.76537	1.17425	2.21865	5.11381	2.729	4.08884	1.86845	4.6818	14.2267	3.34843	2.03736	1.85408	3.75582	1.22844
ENSG00000120899.17	PTK2B	322.745	9.52149	14.0556	1.47619	0.0113627	8.65146	11.0108	8.52095	16.3675	6.49956	8.25615	8.42522	14.7871	7.98529	7.42602	4.67233	8.23931	7.11382	15.8224	7.54455	7.33528	15.1192	13.5219	9.71716	10.7084	23.4961	16.4834	22.5164	18.5346	15.2584	12.7821	6.82705	9.12256
ENSG00000167984.17	NLRC3	74.4352	1.86663	3.78737	2.02899	0.030243	1.70211	0.850015	1.52997	1.80863	1.39979	1.91751	0.508918	8.00829	1.75847	0.735957	0.204878	1.51413	1.46369	0.526906	2.57011	1.34854	3.63457	3.63549	1.66668	2.06766	11.9729	4.06022	7.38421	7.13542	1.64867	0.745154	1.75639	0.879834
ENSG00000178150.9	ZNF114	65.6061	1.34986	3.70448	2.74435	0.0100528	1.87191	0.165116	3.18683	3.63624	0.839645	0.512157	0.460158	0.355657	0.472245	2.19205	0.0269219	1.91178	0.290641	1.26423	1.56226	3.42866	13.3895	3.5746	8.45376	1.07105	1.88242	0.43434	3.64506	1.4759	0.555912	4.94479	1.99106	2.01115
ENSG00000126261.12	UBA2	1111.12	44.165	34.7269	0.786298	0.0140333	34.7618	55.5003	33.4892	32.3346	36.8225	39.9392	54.868	34.1563	56.8947	62.2811	57.0317	37.7991	43.8105	38.5336	42.7527	38.7322	35.8004	44.9071	35.6404	33.7042	16.8204	35.4475	31.4519	25.111	27.8603	38.9231	43.8998	41.8509
ENSG00000172554.11	SNTG2	15.7256	0.50181	0.846036	1.68597	0.0278402	0.195885	0.387037	0.170125	0.372057	0.79502	0.592462	0.19941	0.524023	0.345026	0.550526	0.144242	0.984898	0.21898	0.233569	0.313886	0.438015	1.00167	0.398999	1.40809	0.851803	1.20818	0.513333	1.15853	0.90372	0.232693	0.393463	1.09814	0.0918353
ENSG00000158717.10	RNF166	139.825	3.88403	6.48962	1.67085	0.00291993	3.94472	2.78362	2.61117	5.95131	2.80048	3.42516	2.17564	9.47229	3.31907	3.14179	2.65901	3.70632	3.04381	2.40525	5.32072	3.44243	4.86743	4.22897	5.57932	8.07066	14.425	6.19552	10.4364	8.24359	4.96995	3.56826	5.14566	3.89178
ENSG00000134516.16	DOCK2	150.384	3.74279	7.46476	1.99444	0.0070762	2.91582	1.77699	3.24396	4.53126	4.0147	4.94751	2.0913	12.466	4.5425	2.05905	1.62253	3.08206	2.42824	1.27416	3.64582	4.4769	9.97779	7.97822	2.2925	3.06369	14.2523	11.7106	14.5576	11.6943	4.47135	5.28004	3.11801	2.86864
ENSG00000012779.10	ALOX5	132.241	3.6921	6.12769	1.65968	0.00950535	2.34694	2.84856	3.39101	3.36353	4.83235	4.07225	3.14937	8.01929	4.63335	1.9788	3.34839	4.18911	3.17754	1.67907	2.85189	4.48462	6.53399	4.55406	3.37413	3.06169	10.8251	9.34854	10.0139	10.9969	4.0704	4.83203	3.47724	2.78743
ENSG00000124406.16	ATP8A1	47.2451	1.23128	2.42891	1.97267	0.0051084	0.656615	0.695019	0.734436	1.06629	0.781531	1.41854	0.528091	3.55493	1.18179	1.12286	1.12243	0.786054	1.3399	0.477684	1.50309	3.19921	2.01763	2.31291	0.866267	0.67983	3.10238	3.18196	6.42288	2.78363	1.24428	1.05984	2.3789	1.02612
ENSG00000102128.8	RAB40AL	44.194	1.32106	2.09062	1.58254	0.00915222	0.510442	0.240132	0.671693	2.49724	1.76851	0.406278	1.33844	0.827585	0.874106	1.32831	0.626451	2.35261	2.43044	1.6484	0.795213	3.17054	1.86441	0.820836	3.18511	2.9206	2.05324	1.70923	1.43759	0.981226	1.61695	2.42084	1.70332	1.99423
ENSG00000188996.4	HUS1B	70.5039	1.75207	3.61715	2.0645	0.0257257	1.5373	0.602673	1.14633	2.94939	2.28268	0.543817	1.18558	3.53096	1.44163	0.400049	0.78612	1.93237	2.01559	0.891066	3.5354	1.04168	2.14897	1.73964	4.09285	12.3144	8.01599	2.68576	2.52559	2.7089	0.608724	2.00142	4.10392	1.73507
ENSG00000087884.14	AAMDC	70.9153	2.05997	3.29352	1.59882	0.00867456	1.80218	0.699448	2.13435	1.94488	1.38259	2.00818	1.79292	2.57492	1.95088	1.0552	1.70029	4.19084	0.727517	3.08902	2.34635	2.41179	2.59644	2.75316	2.29406	4.84642	5.19528	6.61187	3.71151	1.55895	3.31827	1.65914	2.16496	2.39389
ENSG00000171951.4	SCG2	56.1485	0.889618	3.50802	3.94329	0.0309303	0	0.36351	0.279621	0.277963	0.701161	3.22885	0.297958	0.156599	0.637978	2.96592	0.296349	0.16188	0.279938	0.863772	1.33276	2.83609	0.836246	0.310644	3.0376	1.25267	0.259015	1.29371	3.46833	0.742686	0.152983	1.3473	1.54708	27.2199
ENSG00000214787.9	MS4A4E	66.6323	1.62346	3.46772	2.13601	0.0244705	1.01138	0.872289	0.887256	1.84337	1.05679	1.07332	0.519993	2.66462	1.73194	0.965031	0.517184	2.26008	2.5823	1.33995	3.5264	0.9899	2.50835	3.73468	2.10364	1.15737	4.06827	2.6995	15.6663	4.1314	2.53635	2.06913	1.23748	0.878074
ENSG00000100055.20	CYTH4	161.769	4.25285	7.75205	1.82279	0.0156421	3.97848	1.86495	4.89127	7.92461	5.85122	5.8356	3.02442	7.46398	3.74364	2.75097	1.93563	3.67924	2.92974	2.24487	4.17419	4.03411	11.2101	7.12892	2.97904	3.73975	12.7646	8.57659	14.1061	16.3473	3.67958	8.22921	3.32848	3.35293
ENSG00000125447.17	GGA3	307.852	9.42659	13.0195	1.38114	0.00764634	8.80682	7.77756	7.91101	13.6587	10.5189	9.73793	6.85698	8.3363	7.87603	10.3542	6.40735	14.0862	10.759	7.60464	9.20735	13.1142	8.13277	11.1658	14.4525	22.6604	22.238	10.1345	12.1973	12.1838	9.45936	11.3209	12.7758	8.11759
ENSG00000257524.6	AL157935.2	6.95955	0.247713	0.464912	1.87681	0.00147902	0.183572	0	0.108703	0.277351	0.318008	0.182639	0.0849435	0.33483	0.168406	0.0716558	0.0844847	0.115374	0.0570044	0.136805	0.0919237	0.264326	0.316627	0.1968	0.240549	0.36762	1.29222	0.461022	0.387753	0.430074	0.272583	0.268867	0.137828	0.107578
ENSG00000142303.13	ADAMTS10	76.3291	1.99448	3.78554	1.89801	0.00823712	1.4736	0.64991	1.66036	2.41193	2.37042	1.90594	1.07963	3.49041	2.34321	0.934711	1.05967	2.97139	1.22025	2.83697	2.00874	1.50817	2.28003	2.66588	4.52858	4.67244	8.80894	3.35216	8.36519	4.24905	2.00578	2.31245	1.84399	1.31934
ENSG00000167851.14	CD300A	96.9951	2.80017	4.44558	1.58761	0.0221294	1.94319	2.69675	2.68491	3.29938	2.56477	2.26842	3.32692	4.01691	3.5653	2.3261	1.81843	2.36115	2.37344	1.06197	4.19495	2.37008	7.78106	4.75668	2.42506	1.55657	5.38467	5.37521	6.8409	8.17121	2.77	3.36108	3.37186	2.32815
ENSG00000136169.16	SETDB2	137.513	4.32419	5.80388	1.34219	0.0117518	3.854	3.44114	2.97045	4.11957	4.00974	5.40468	3.2634	6.26447	3.68471	4.11401	3.29404	5.27285	5.1779	3.88815	4.60373	5.44502	4.94766	6.70349	3.82814	3.48023	5.51908	8.97754	9.46976	4.63035	6.914	3.94966	6.16784	4.11764
ENSG00000185164.14	NOMO2	466.532	19.9733	13.0564	0.653693	0.00660626	14.7253	16.5675	7.93715	14.8689	16.042	17.7854	21.2514	18.7039	16.2388	20.7206	41.5978	38.9606	22.9591	13.2569	16.4834	12.3328	9.47606	10.2529	12.5104	15.8786	15.2223	8.64652	12.8874	11.1346	16.3302	13.5307	15.3856	14.8451
ENSG00000148926.9	ADM	627.9	28.9231	15.1425	0.523543	0.0342973	43.8671	15.8185	42.2637	49.9406	36.2187	22.4565	39.7027	4.34722	26.3795	19.5118	58.9359	12.3884	6.92101	40.5642	13.0315	14.6658	17.0186	24.2391	25.3227	33.3922	10.1917	6.16144	7.68756	16.5308	9.87105	17.6292	5.99716	6.84523
ENSG00000224389.9	C4B	6.49384	0.245777	0.431322	1.75493	0.0339159	0.0732151	0	0.173419	0.379261	0.217428	0.252522	0.0903428	0.326437	0.134332	0.0571579	0.0449274	0.0920305	0.106099	0.109125	0.130356	0.570523	0.623982	0.497109	0.0548226	0.698191	0.359952	0.575599	0.1031	0.140742	0.173945	0.408509	0.0244315	0.0762777
ENSG00000077157.21	PPP1R12B	220.122	6.41234	9.74898	1.52035	0.014367	4.32947	7.75802	3.3166	5.78253	5.70064	5.60879	6.60224	10.7363	5.06192	5.8776	5.82846	7.46851	5.66671	5.49308	9.45424	11.4756	4.41457	7.39869	6.1477	7.79769	13.2035	20.3251	11.2338	6.25989	12.9809	4.41635	11.2056	8.57744
ENSG00000156265.15	MAP3K7CL	66.4669	1.62997	3.44749	2.11507	0.00348568	1.16799	1.40114	1.5677	0.504191	2.6978	0.805689	0.630536	1.15988	1.30008	1.82366	2.54436	3.3278	1.69258	0.870431	1.45568	2.03134	1.48525	2.52518	1.77831	7.48484	2.66232	3.96206	2.83717	1.93651	10.1285	1.07529	3.66367	1.94695
ENSG00000177374.12	HIC1	64.0312	1.83708	3.02115	1.64454	0.00769286	1.90025	0.914266	1.84131	1.28636	2.35133	1.32341	0.789366	4.58194	2.50394	0.876608	1.27206	1.35715	0.978998	2.62307	1.45616	0.885232	3.1724	2.94001	2.02114	2.71816	3.53231	2.84827	6.34002	4.37408	2.61643	2.94583	2.24818	1.33294
ENSG00000059377.16	TBXAS1	56.4529	1.64656	2.65804	1.6143	0.0171365	0.960126	1.07606	1.23742	1.53594	1.73314	2.24763	1.47656	2.81573	1.86523	1.32274	0.961729	1.59732	1.50827	0.673433	2.18709	2.15266	3.72464	2.8306	1.24756	1.35723	2.61259	3.56446	4.86133	4.88555	1.30827	2.24525	1.07425	1.3901
ENSG00000115085.13	ZAP70	67.0391	1.69302	3.41875	2.01931	0.0363871	0.787885	0.725188	1.00072	1.98151	1.28858	1.39053	0.348724	7.28954	1.7347	0.989491	0.252247	1.42095	1.61689	1.35303	1.71536	1.23023	3.30875	2.47889	1.74422	5.88005	9.0025	3.15693	6.58453	5.75366	1.42425	0.74542	1.40601	0.428265
ENSG00000151445.15	VIPAS39	244.564	7.93015	9.8778	1.2456	0.0118185	6.5863	4.48049	7.76283	7.89532	6.82469	6.71309	7.2135	9.5933	9.84132	11.1714	6.69478	10.0061	11.0943	4.51993	7.05491	11.093	7.98044	7.97525	8.47975	12.6881	11.3724	9.78892	12.4107	9.52981	8.2742	9.478	7.63701	10.4038
ENSG00000154262.12	ABCA6	61.2388	1.37083	3.34433	2.43963	0.0147909	0.630992	0.366689	0.571459	0.875898	0.78384	1.17186	0.503803	4.51338	1.00336	0.917598	0.757316	4.04351	0.814501	0.811393	1.29692	1.63479	1.87792	3.31598	1.26921	3.29887	2.90311	6.16576	12.9754	1.64998	1.38154	0.766263	4.65707	0.280356
ENSG00000126759.13	CFP	15.8847	0.505945	0.853504	1.68695	0.0142606	0.748079	0.373921	0.29532	0.376747	0.555396	0.570611	0.201924	0.739092	0.480392	0.219005	0.200834	0.274262	0.212942	0.278749	0.561902	0.348494	0.721047	0.4177	0.350095	0.428029	1.2538	1.30694	1.25095	1.61779	0.962702	0.495658	0.374446	0.267909
ENSG00000155657.26	TTN	58.5645	1.19757	3.33853	2.78774	0.00926283	0.769632	1.41434	3.02783	1.42294	0.645325	1.29191	0.219942	3.11804	0.790017	0.813373	0.188277	0.7325	0.506318	0.587816	0.935359	0.858537	1.14308	2.94934	1.86992	2.06456	9.04281	2.53364	13.7498	3.7213	1.13276	0.570236	1.07247	1.39246
ENSG00000177363.4	LRRN4CL	15.8673	0.525485	0.829619	1.57877	0.0120229	0.406379	0.908089	0.347592	0.292372	0.603415	0.808626	0.156702	0.741225	0.596488	0.264378	0.124684	0.510814	0.294449	0.10095	0.226105	0.390098	0.384823	0.617188	1.01431	0.77506	0.544884	1.36077	1.3591	0.781185	0.563197	0.736913	0.745837	0.211689
ENSG00000131042.14	LILRB2	109.389	2.79165	5.40879	1.93749	0.0174739	2.80315	1.03767	5.09762	3.88801	3.27523	3.69414	2.78555	2.96155	2.24273	2.26012	1.56502	2.77261	1.76946	1.06163	3.16019	1.68145	11.3016	2.90661	2.37423	3.57585	8.87259	5.57966	5.72686	12.2235	2.72941	7.73044	1.97813	2.33393
ENSG00000160613.12	PCSK7	162.383	5.06125	6.86651	1.35668	0.019338	4.13703	2.5371	3.58246	7.00106	4.98503	4.23002	3.86494	7.59833	4.11931	4.74957	4.80147	7.55853	3.79306	5.11895	6.34195	3.48412	6.4323	5.37349	10.1867	7.30337	8.53632	6.98761	9.21936	8.55624	5.79097	7.37819	5.28102	3.43497
ENSG00000154529.14	CNTNAP3B	24.2312	0.717649	1.25127	1.74357	0.00979154	0.344336	0.831752	0.486226	1.47498	0.281865	0.48489	0.294154	0.515331	0.26243	0.630688	0.127997	1.04877	0.764935	0.858665	0.857711	0.892909	2.35416	0.454336	1.98334	0.727454	1.82902	0.856087	1.06302	0.92605	2.17105	0.565291	0.543581	0.600199
ENSG00000162804.13	SNED1	62.0468	1.4443	3.32172	2.29989	0.00296613	0.515249	0.581744	0.772941	1.27891	1.46639	0.656166	0.423194	6.06172	1.42277	0.281573	0.918885	2.54207	1.112	0.806365	1.32446	1.12596	1.43761	2.0507	2.99969	4.92333	5.95866	3.81447	10.5841	3.13854	1.10172	1.0673	2.23087	1.44937
ENSG00000114204.14	SERPINI2	53.3556	0.912952	3.26625	3.57769	0.0465697	0.0617572	5.36028	0.04876	0.213272	0.183401	0.933937	0.114307	1.35172	0.022662	0.192851	0.284223	0.0776281	0	0.0920477	3.25743	1.17171	0.175444	0.562762	1.84972	14.3463	2.981	6.069	0.521791	0.222593	12.6182	0.0516869	0.494594	0.0965107
ENSG00000085563.14	ABCB1	26.6445	0.771821	1.3744	1.78072	0.00930737	0.301553	0.425587	0.32142	0.130173	0.611943	0.936062	0.488378	1.79675	0.962705	0.965212	0.388592	0.720192	0.861497	0.382039	0.785215	1.32816	0.856671	1.35779	0.451598	0.966222	1.25342	2.43659	2.48415	0.869515	0.85972	0.605714	2.62636	0.47125
ENSG00000186583.11	SPATC1	10.2191	0.345627	0.60267	1.7437	0.0150206	0.174471	0.123117	0.447695	0.602517	0.17271	0.0694336	0.121098	0.477346	0.288102	0	0.120444	0.328962	0.162535	0.130022	0.465954	0.650221	0.991297	0.280565	0.326604	0.399308	0.701806	0.495318	0.552794	1.19481	0.207255	0.511074	0.0873302	0.136327
ENSG00000130592.15	LSP1	188.972	4.71345	9.31313	1.97586	0.00786696	2.65914	3.82154	4.97992	5.17947	4.65467	5.16219	3.09114	13.1902	5.17639	3.49367	2.52224	2.77184	2.96058	5.31674	4.22204	4.15302	7.76483	7.24856	5.80342	17.4043	22.7841	14.0362	14.4873	10.0286	4.23743	5.0753	3.96058	2.78726
ENSG00000166676.15	TVP23A	7.73363	0.291694	0.473709	1.62399	0.0218367	0.0303382	0.192676	0.0958132	0.288117	0.225239	0.120736	0.126344	0.627142	0.322848	0.165792	0.0558498	0.190674	0.188418	0.0226092	0.222814	0.215851	0.332434	0.130097	0.408903	0.416607	0.732208	0.649281	0.608782	0.503004	0.360389	0.355476	0.121484	0.0237054
ENSG00000174840.8	PDE12	97.2527	3.19106	4.01437	1.25801	0.0112964	3.26798	2.83082	2.52614	2.5173	2.6248	3.6135	2.65311	3.47411	2.75025	3.74287	3.24218	3.83724	2.68589	2.27501	4.32465	2.60556	2.86697	3.48249	3.04779	3.78447	4.30308	3.2051	4.56745	4.03444	6.46235	3.58674	4.99545	3.94495
ENSG00000141338.13	ABCA8	56.3928	1.23464	3.12871	2.53411	0.0159787	0.654045	0.48351	0.0983613	0.524335	0.477874	1.3882	0.317056	4.75291	0.411435	0.82669	0.365511	3.99319	0.706014	0.232105	1.78833	1.56169	0.410794	2.97164	1.85402	3.172	3.7584	9.72617	7.15429	1.96449	1.53539	0.338863	4.64564	0.279862
ENSG00000163815.5	CLEC3B	94.2914	2.25041	4.87195	2.16492	0.0675013	1.10912	1.22989	2.75218	0.957552	2.58795	3.02668	1.46633	2.40833	4.01179	2.845	2.26054	1.79247	0.590421	2.36158	2.85629	8.42797	0.900241	2.54793	8.77948	5.62076	3.82405	13.3562	5.35485	4.56869	5.45832	1.5913	1.11032	0.495218
ENSG00000101938.14	CHRDL1	53.8021	1.09908	3.08584	2.80765	0.0417498	0.893274	0.504277	0.0352639	0.0385603	0.353703	0.853183	0.124002	5.18663	1.73728	0.104605	1.5211	1.62811	1.05407	0.266281	0.685871	1.6494	1.46822	2.89687	2.87615	1.43109	0.359317	7.60793	12.1701	5.08704	2.28142	0.0373807	0.357697	0.593283
ENSG00000278570.4	NR2E3	14.4463	0.421359	0.840456	1.99463	0.0381862	0.215884	0.22851	0.0639185	0.605744	0.240417	0	0.124869	0.951602	0.217853	0.547745	0	0.339204	0.134076	0.32177	0.828796	0.0548562	0.547586	0.983619	0.969906	1.91459	1.08548	1.27292	0.399003	1.01155	0.384674	0.677554	0.324177	0
ENSG00000087299.11	L2HGDH	109.294	3.38524	4.71658	1.39328	0.0201331	3.38507	2.51442	2.57218	2.63683	2.02817	4.76058	3.74513	3.52816	2.9046	4.01367	2.56526	2.65537	4.26787	2.80719	4.89405	8.26949	2.1898	3.66991	4.66918	6.08719	3.95864	3.69063	4.24709	2.18331	4.11184	4.47329	6.77748	5.68774
ENSG00000137760.14	ALKBH8	99.556	3.07342	4.32729	1.40797	0.0155291	1.43764	2.08381	2.88372	2.11337	3.21166	2.62872	2.66094	3.94515	3.23658	2.63903	2.18163	6.05623	2.24422	3.88016	3.39845	2.30373	5.5822	6.45654	4.94603	3.24584	2.55281	5.63423	5.70405	3.75325	2.07704	4.48767	4.62879	3.58253
ENSG00000017260.19	ATP2C1	686.854	28.724	19.9072	0.69305	0.00717404	27.6175	54.3246	23.0526	18.2635	23.4999	19.385	23.394	36.1023	39.0766	18.1006	41.6815	20.0139	27.9963	27.7683	29.0837	16.8228	22.4331	15.4747	17.0845	10.3546	13.9482	26.2665	20.2181	12.2172	16.1841	22.2555	32.6182	31.6158
ENSG00000028137.18	TNFRSF1B	220.341	6.18092	10.0328	1.6232	0.0161044	4.55603	5.54424	7.08424	8.1077	8.09966	6.43852	5.20595	12.6347	5.78323	4.57305	3.7229	6.545	3.89786	3.46462	5.55614	5.63882	15.1317	7.05237	3.68999	5.79885	13.8384	9.84803	17.5777	19.203	6.73756	12.2953	7.1207	5.19463
ENSG00000153551.13	CMTM7	57.6223	1.45716	2.96653	2.03584	0.00069019	0.70014	1.28456	1.10558	0.926846	2.17163	1.78325	0.561554	4.00138	1.7813	0.801663	0.902225	1.70146	0.695724	0.973973	0.966085	1.15441	2.55729	4.22833	2.65623	1.28192	3.25439	2.75217	5.61975	4.6433	0.942594	3.04706	2.75687	2.37064
ENSG00000147381.11	MAGEA4	213.014	11.8267	2.95487	0.249847	0.0446653	4.83023	0	0	17.711	23.0073	0.0452299	3.05022	6.28808	2.35634	2.12944	54.1366	10.143	22.1283	27.9504	2.1247	1.42471	0	0.182763	0	0.0650286	0.304776	1.68774	12.9635	1.5976	11.6107	7.08644	0.0568879	0.133207
ENSG00000083814.13	ZNF671	51.1726	1.0475	2.94309	2.80963	0.00135708	0.842692	0.314816	0.371808	1.02711	1.49663	1.26254	0.481685	2.53161	1.2551	0.541781	0.296576	0.747709	0.923578	0.96048	1.15837	2.03212	1.79045	2.60396	0.630997	1.3614	2.85799	2.61971	5.07821	1.9296	1.05992	1.07866	1.29022	12.6269
ENSG00000221867.8	MAGEA3	225.166	12.709	2.87159	0.225948	0.022512	2.54593	0.138197	0	23.1638	22.8759	1.6367	5.89034	12.2642	0.538983	15.7476	39.6577	0	18.4875	19.776	26.4128	19.5072	0	0.419905	0	4.48217	0.393883	2.0101	6.92894	0.0705873	1.97744	0.163906	0	0.0765123
ENSG00000079102.16	RUNX1T1	41.3578	1.13654	2.08536	1.83483	0.00249314	0.595032	0.702858	0.791516	0.323867	1.22927	0.957506	0.646443	2.97284	1.48572	0.444335	0.589372	2.37392	0.441853	1.14716	0.846386	0.810772	1.61691	2.70418	1.26886	1.42105	1.35285	3.08477	5.1914	1.7717	1.0449	1.69971	2.35681	1.48579
ENSG00000135898.9	GPR55	19.5607	0.586925	1.04283	1.77678	0.0114897	0.593497	0.0897442	0.384914	0.0731992	0.377682	0.708576	0.137313	1.54646	0.342235	0.330953	0.175592	0.586158	0.868834	0.126371	0.962343	0.947937	0.619364	0.931672	0.380917	0.339581	1.70524	1.85156	1.25362	1.37517	1.10789	0.993439	0.551703	0.198747
ENSG00000169249.12	ZRSR2	609.323	18.7112	25.4965	1.36264	0.0131032	18.1235	13.0864	10.1163	25.2534	13.226	27.5754	19.0348	23.6267	22.3023	20.8612	13.6171	15.0461	15.5487	20.9819	20.7678	22.105	27.1288	22.2761	22.723	32.7009	47.3577	24.0048	28.8448	22.4225	14.6197	30.9009	15.4428	19.6281
ENSG00000196998.17	WDR45	134.699	4.1831	5.75021	1.37463	0.0157696	4.46375	2.56069	3.09329	4.82414	6.11941	4.8564	2.25867	5.27164	4.57222	4.23689	2.91154	3.51184	4.647	2.12995	5.78907	5.02657	3.98803	3.6493	4.61684	8.37867	9.64507	6.24154	7.32584	6.18087	5.18807	3.14458	5.62593	4.44136
ENSG00000171824.13	EXOSC10	487.283	16.0302	19.2022	1.19788	0.015353	10.1205	18.0084	15.9926	15.9642	15.8359	15.2051	16.4648	21.2081	19.3714	16.0067	15.7584	10.6317	16.3747	13.2586	18.7525	17.1046	21.649	14.6175	16.2263	23.4296	20.257	17.6429	15.8019	17.5134	18.7436	17.746	20.2046	27.3927
ENSG00000151376.16	ME3	54.6224	1.35125	2.85797	2.11505	0.00677947	0.410562	0.257526	1.36866	1.77229	1.78372	0.435706	0.696585	1.10941	1.15504	0.783491	1.67957	0.802777	1.55823	1.66582	3.28942	1.60736	1.27743	1.78504	1.26385	6.3687	6.48357	4.68221	3.32433	4.07766	1.02961	1.33628	1.37002	1.24756
ENSG00000198771.10	RCSD1	129.241	3.33705	6.30654	1.88986	0.00865646	2.81698	1.53409	3.22741	3.25153	3.51599	3.41194	2.16776	10.0342	3.89885	2.41431	1.49374	2.88662	2.60525	1.98523	3.31186	3.76572	7.69201	6.82776	1.99469	2.59289	9.89432	8.89335	14.5522	10.4403	3.89191	2.84454	4.35267	2.94279
ENSG00000186818.12	LILRB4	53.8045	1.31313	2.83904	2.16204	0.00644166	0.774698	1.07382	1.43084	1.81541	1.08184	1.67365	0.793762	3.58304	2.11178	0.712793	0.967742	0.799895	0.532682	0.309286	0.535713	1.65917	10.7346	3.01064	1.11873	1.07649	1.521	1.96974	4.09092	3.13132	0.887402	3.40396	1.2741	1.72951
ENSG00000104774.12	MAN2B1	225.676	6.91628	9.59473	1.38727	0.0223826	7.62358	6.69007	4.92592	6.52555	5.9986	7.10509	3.69346	9.1711	8.3088	5.23945	8.8764	5.77422	8.21488	4.61309	9.48396	7.26296	8.6736	7.05526	9.12375	14.6518	16.556	12.1236	11.0106	10.9676	8.35948	8.12553	4.99006	4.53128
ENSG00000119685.19	TTLL5	230.223	7.55677	9.20548	1.21818	0.0117589	7.65073	5.71104	5.96169	7.03655	6.28769	10.5998	6.40008	11.1516	7.93525	8.2126	6.29325	9.07861	8.25315	4.90381	6.37564	7.81974	6.98035	8.707	9.4375	10.2088	10.8324	7.85517	11.0198	6.69842	9.32573	8.17121	11.2885	10.0266
ENSG00000185989.10	RASA3	260.79	7.40183	11.7356	1.5855	0.00890148	10.4027	6.71822	8.18436	7.80695	8.00528	5.88075	3.43586	12.6048	7.25693	3.61581	3.01129	17.789	3.37873	7.77989	3.65684	4.78229	14.3213	10.6794	12.2759	10.5582	22.9185	9.92192	15.6065	15.0244	6.33156	13.3211	7.24932	8.272
ENSG00000174749.5	FAM241A	44.6841	1.32784	2.12049	1.59694	0.0144279	0.236039	0.471928	2.62461	1.91896	1.19749	0.641892	1.56551	1.44705	2.04267	0.95207	1.06821	1.73074	0.586375	0.791573	1.14257	1.00629	2.70616	1.571	0.765886	1.19298	1.74068	2.60311	1.64115	1.70152	1.56552	3.35834	2.40233	4.01144
ENSG00000151498.11	ACAD8	79.0555	2.41762	3.50702	1.45061	0.0154576	2.31848	2.16992	1.4837	2.67589	2.79033	2.25327	1.81815	4.55528	1.96125	1.71474	2.26883	1.25775	2.13713	2.4917	2.86782	1.86867	3.07039	2.61636	6.61526	4.9432	4.48304	3.28305	3.99512	3.8704	1.94239	2.92084	3.1761	1.50648
ENSG00000100568.10	VTI1B	321.929	10.5192	12.8416	1.22079	0.0241864	9.55706	7.10683	13.2647	8.59051	9.95457	10.351	10.1741	10.4444	12.4298	13.9068	9.01953	11.4048	12.6787	6.58135	10.8234	8.61743	14.1889	12.6775	10.1455	11.1788	7.78594	15.3494	15.4916	13.1682	12.9337	14.9089	13.2915	15.9041
ENSG00000076662.9	ICAM3	61.5361	1.7528	2.92647	1.6696	0.0252722	1.60244	2.05215	1.40577	1.74214	2.08565	2.50363	1.70269	3.861	1.67695	0.741334	1.20183	0.746019	1.14265	0.663445	1.66429	3.45853	3.01079	2.03604	1.06657	1.96957	5.3317	3.86235	4.13696	5.34789	2.18556	2.43393	1.06945	0.834736
ENSG00000139517.8	LNX2	274.076	11.1584	8.42316	0.754875	0.00628906	13.2841	11.9809	10.6062	10.0835	9.62241	7.03894	10.5672	7.98588	9.21527	10.7494	13.6185	12.6642	14.2061	9.20462	15.048	6.24531	4.33113	8.04076	8.54994	8.02779	6.8545	14.7332	8.23659	9.06497	15.204	5.59021	6.49985	6.8227
ENSG00000106538.9	RARRES2	190.493	5.00011	9.09932	1.81982	0.0258223	4.10134	1.86512	9.17485	4.17038	10.7814	5.07794	1.8978	6.20624	8.56177	1.35189	3.43953	5.49902	2.71698	6.5884	2.06896	3.79807	8.43336	9.57542	4.02647	12.0984	9.40972	6.7274	17.1337	13.8627	1.624	18.841	4.19703	7.26393
ENSG00000167264.17	DUS2	110.242	3.49866	4.65862	1.33154	0.0137147	3.99337	2.18253	3.30749	5.2053	5.09634	3.08497	3.15219	3.47528	3.44795	2.75079	1.3874	5.26567	2.06676	2.53836	4.0255	4.24457	3.08243	3.50464	7.15299	5.01779	5.72187	3.23183	3.68	3.86646	4.83676	3.83369	5.64381	5.44524
ENSG00000168228.14	ZCCHC4	109.745	3.46578	4.6583	1.34408	0.0159905	2.3079	3.11678	1.83789	3.91633	3.36781	2.62871	2.6514	5.3466	2.73049	3.44815	2.98502	4.85167	4.30001	3.67709	3.32092	4.71847	5.32911	3.02876	3.00932	5.73738	3.46796	2.98926	4.58071	3.41341	3.35605	6.66056	5.81583	7.15112
ENSG00000149311.18	ATM	266.457	7.86835	11.6332	1.47848	0.00594358	6.1058	5.93207	4.63915	7.66754	7.29132	9.01622	5.47827	17.2292	6.61979	4.23073	4.3697	11.4114	7.01712	10.5103	9.00665	7.2477	12.9619	14.0155	11.0142	8.73389	12.0158	15.4585	22.8784	10.5245	6.62845	8.45379	11.3987	8.60018
ENSG00000174177.12	CTU2	76.1943	2.23661	3.49578	1.56298	0.0130701	2.37937	0.979428	1.89818	3.12413	2.03639	1.89381	1.21568	2.59189	2.5284	2.6702	2.12166	1.55773	1.66244	2.17955	3.21035	4.16501	2.13245	2.36482	6.01303	6.40994	6.4471	2.25165	3.03645	2.21547	1.88431	2.5722	1.78646	2.86622
ENSG00000205155.7	PSENEN	90.5499	3.87987	2.70399	0.696926	0.0126048	2.18259	4.68745	3.33411	1.88433	2.95902	3.77651	3.24938	2.88477	4.7358	4.37091	5.28447	6.56052	3.30038	2.5459	4.94196	3.02216	4.73698	2.95026	1.49218	0.977332	1.65409	2.6526	1.60355	3.1467	4.05816	3.09743	2.75495	1.70542
ENSG00000204161.13	TMEM273	48.511	1.25639	2.49732	1.98769	0.007342	0.679434	0.479448	0.905246	1.02653	1.24006	1.11537	1.17897	2.9949	1.62058	0.795635	0.488584	2.29523	0.553833	0.696218	1.27585	1.30922	4.51524	2.13965	0.985707	1.16626	2.96076	2.70787	6.41331	4.13252	1.56376	1.35053	1.1903	0.729975
ENSG00000071205.11	ARHGAP10	140.417	4.537	5.78171	1.27434	0.0173984	3.79162	6.82103	5.1907	3.25944	4.29299	3.4712	4.81918	5.68898	2.49606	4.0272	5.39229	3.35462	5.88199	4.23243	3.83534	3.36864	5.94379	5.56516	5.38579	5.36311	8.42226	4.14366	6.46212	7.09705	5.35465	6.45565	6.43483	3.86545
ENSG00000105967.15	TFEC	52.373	1.27692	2.77071	2.16984	0.00273906	0.445604	1.12914	1.33533	1.0667	1.66417	1.2091	0.918494	3.21413	1.24123	0.426938	0.438123	1.73127	0.880554	0.573594	1.37939	1.17346	5.84451	3.85427	0.621825	2.75821	2.33559	2.42395	6.95229	2.42375	1.17897	1.66129	1.84518	1.64595
ENSG00000186827.10	TNFRSF4	53.8599	1.37745	2.76909	2.0103	0.00660921	0.712128	0.502519	2.04822	1.66878	1.76235	1.70042	0.423669	3.34004	1.0826	1.35016	0.51502	0.767259	0.884545	0.90978	1.49432	1.30975	2.97266	1.41782	0.990289	6.17008	6.95669	2.48826	3.43818	3.08009	1.81273	1.87316	0.916587	1.27186
ENSG00000104903.4	LYL1	48.877	1.30989	2.46375	1.88089	0.0181143	0.561339	1.18834	1.28528	1.74467	1.33361	1.11697	1.19483	2.55967	1.68908	1.05175	1.03337	0.282239	0.766973	0.878496	1.46167	1.31226	1.54913	2.16644	1.05081	4.04689	5.26861	1.88783	4.56494	4.613	1.53368	0.939611	0.786728	1.00881
ENSG00000165752.16	STK32C	70.3337	2.13147	3.16628	1.48549	0.00823009	2.1249	1.49945	2.61409	2.47448	1.9567	1.33729	1.98936	1.92286	2.06721	2.58476	1.93313	1.67712	2.11763	2.68836	1.48471	1.65748	2.34643	1.72175	2.96018	3.84533	7.42096	2.78424	3.07922	3.06353	1.52625	2.85372	3.16607	3.43651
ENSG00000111837.11	MAK	7.41564	0.441892	0.275942	0.624456	0.0297216	0.165719	0.526233	0.0817762	0.39345	0.471631	0.329752	0.383412	0.554155	0.136825	0.161717	0.0572011	0.468689	0.385953	0.154375	0.857498	0.1544	0.0840686	0.133245	0.124088	0.189638	0.2222	0.21714	0.218776	0.209056	0	0.277392	0.165898	0.291348
ENSG00000263264.1	AC119396.1	48.8898	1.05678	2.75677	2.60865	0.0411422	1.46089	0	0.754168	1.35827	0.778691	1.25221	0.415994	5.12427	0.783497	0.17546	0.206874	0.141255	0.907296	0.167494	0.825327	1.82751	1.18577	2.289	0.58902	0.900174	10.246	3.04307	3.32315	8.66783	1.60191	0.376206	0.224996	0.263422
ENSG00000253159.2	PCDHGA12	53.5306	1.37375	2.74803	2.00038	0.00781438	0.945405	0.179613	1.14837	2.1661	0.971856	1.01295	0.757149	1.7465	1.37433	0.454192	0.435101	3.15373	0.925892	2.79111	1.04393	4.29947	1.66754	1.26691	7.35135	3.12076	4.58295	2.58868	1.95854	1.80862	1.38222	1.94768	0.546018	1.90361
ENSG00000121753.12	ADGRB2	19.8846	1.02884	0.557846	0.542209	0.0152259	1.69303	1.22656	0.454484	0.506713	0.61451	1.34754	0.501382	2.07242	0.530143	0.458196	0.290893	1.90112	0.714999	1.37947	0.241148	0.206496	0.29316	0.242003	0.743728	0.51664	0.544813	0.285922	0.786748	0.455632	0.0804464	0.831282	0.700545	0.264577
ENSG00000154258.16	ABCA9	49.431	1.10338	2.74464	2.48748	0.0142529	0.517256	0.4326	0.423522	0.694668	0.777534	0.609928	0.35459	3.92527	0.892804	0.83754	0.599547	2.5285	0.868554	0.513972	1.07444	1.36952	1.77268	2.90614	1.49188	2.5869	2.1834	5.50573	9.83325	1.3672	1.63854	0.609282	3.01101	0.104785
ENSG00000138744.14	NAAA	73.5587	2.19317	3.34316	1.52435	0.02086	1.4528	1.91182	1.20905	1.69496	3.38155	2.50017	1.88956	3.43766	2.69436	0.796988	4.28276	1.08582	1.3656	1.49234	2.20213	1.51654	3.95191	3.38858	1.49945	3.10033	3.7906	4.80185	5.59829	3.93434	3.21836	1.51166	4.28451	1.5647
ENSG00000104974.11	LILRA1	11.4961	0.380384	0.660795	1.73718	0.0137077	0.0976201	0.10333	0.32757	0.25284	0.579808	0.388495	0.406543	0.356113	0.322398	0.190526	0.449274	0.184061	0.0909416	0	0.456244	0.380349	1.08949	0.418618	0.255839	0.167566	0.458121	0.575599	0.876349	1.47779	0.463854	0.653615	0.244315	0.228833
ENSG00000068831.18	RASGRP2	50.864	1.2181	2.7225	2.23505	0.0225328	1.00721	0.284298	1.12469	1.29194	1.06826	1.14524	0.426114	5.00397	1.01376	0.62905	0.397324	1.04901	0.697025	0.557596	1.07597	1.26748	1.13286	1.5117	1.40063	1.58069	9.8393	2.06131	4.95402	6.742	1.43576	0.84297	0.806642	0.517175
ENSG00000170917.13	NUDT6	28.9803	0.918493	1.38484	1.50773	0.0219472	0.982859	0.599838	0.304112	1.00909	0.749424	0.634289	0.651463	0.985182	0.49713	0.622137	0.586817	1.13527	1.51778	0.831446	1.17056	1.06198	0.884007	1.69443	0.596718	0.45597	1.28223	1.1022	1.7394	0.689359	1.23065	1.20054	2.41993	2.34545
ENSG00000110079.17	MS4A4A	47.3911	1.03777	2.66342	2.56647	0.00173566	0.53451	0.628636	0.98471	0.97421	0.705485	0.709056	0.879402	1.661	2.02678	0.463648	0.737987	2.01562	0.885231	0.265558	0.594791	1.14692	4.60362	2.16476	0.93388	1.01944	1.19447	2.20485	10.9139	3.51059	1.34045	1.68999	1.07018	1.53139
ENSG00000176438.12	SYNE3	79.8479	2.18077	3.84125	1.76142	0.00655753	1.80248	0.972657	1.72755	2.42163	1.86062	3.98174	1.0303	6.33508	2.44056	1.21904	0.847295	1.92645	1.38883	0.998479	2.2589	2.16841	4.13482	2.85205	1.28472	2.12883	4.79486	5.68764	7.98112	5.1279	2.55339	5.65509	2.35445	1.91303
ENSG00000158270.11	COLEC12	69.6761	1.9228	3.35647	1.74561	0.016459	0.715593	0.841607	3.23928	0.967895	3.05779	1.80362	1.25827	3.11803	3.2561	0.465543	1.46005	1.85895	1.11106	3.05751	1.13074	2.03653	4.4143	6.46969	1.69679	1.3648	1.24733	4.91738	6.34839	3.16385	1.9268	3.13427	4.17882	1.43514
ENSG00000000938.12	FGR	88.4608	2.44931	4.19393	1.71229	0.0100981	1.66313	2.3472	2.40736	2.91522	2.96839	3.77064	2.07551	3.33991	1.79388	2.2033	1.90194	1.58373	1.2833	1.3521	3.63408	2.25387	6.50415	2.80952	2.22649	2.30689	8.2441	3.4999	5.80171	9.26413	3.11312	2.6995	2.37126	2.12649
ENSG00000172171.10	TEFM	152.257	4.85877	6.32121	1.30099	0.0230552	7.38558	4.1387	4.48061	4.45405	5.75206	5.01395	3.79443	5.61296	4.42394	4.28196	4.12384	2.73047	6.07086	4.6946	4.4235	6.45799	3.70261	7.13182	7.44141	4.41224	4.0048	6.75986	7.34132	4.50191	7.28965	4.22689	9.84001	7.76524
ENSG00000130312.6	MRPL34	177.823	5.50404	7.54327	1.3705	0.011567	7.37296	6.96148	2.74665	3.4965	4.16324	5.62041	3.94023	3.9776	5.29674	6.80985	6.06958	7.57081	5.15947	4.179	7.69602	7.21243	5.60515	5.90034	13.141	11.8833	7.79729	5.94158	5.59335	5.38976	5.42773	5.90996	9.25218	7.70841
ENSG00000072694.20	FCGR2B	59.3652	1.56947	2.97101	1.893	0.0193116	1.31621	1.05882	1.89135	2.09087	1.75894	3.01712	1.04755	2.24068	1.4876	0.945338	0.593638	0.992673	0.588557	0.745474	2.26727	1.59644	3.55755	2.92087	1.18267	0.692846	2.7178	3.77116	7.8957	5.02867	2.56419	3.17255	1.31763	0.905033
ENSG00000189283.9	FHIT	23.4101	0.70241	1.20569	1.7165	0.0464682	0.675991	0.0227152	0.0762463	0.333495	0.477976	0.358696	0.357484	0.880707	0.637861	0.728778	1.15555	0.930638	0.599757	0.983559	0.816705	0.512583	0.470302	1.15607	0.337449	1.17876	2.50335	1.05446	1.73385	0.904982	0.152955	1.34705	1.96572	1.0564
ENSG00000148606.12	POLR3A	189.774	6.41081	7.41629	1.15684	0.0143742	8.54105	5.72225	8.20074	5.91607	5.75317	6.15736	6.16902	7.58042	4.24373	6.80582	5.51218	4.26972	7.58481	5.67739	6.52847	7.52366	7.96049	7.37782	7.76273	8.3134	7.76634	6.21738	7.54818	6.70894	6.34415	7.57557	6.38817	7.62494
ENSG00000184371.13	CSF1	161.749	4.59971	7.3503	1.59799	0.014242	3.97472	3.5345	4.96246	5.38449	4.39843	4.34675	3.69337	7.97674	5.26496	3.50665	2.52827	6.25538	7.08449	1.758	2.8264	5.01432	13.0359	5.40436	3.62954	4.28958	14.645	9.52692	11.5355	7.85028	3.80031	5.19273	4.49664	5.83273
ENSG00000177455.12	CD19	47.9461	1.07624	2.66173	2.47317	0.0499189	1.93746	0.82031	0.535397	1.50543	0.6393	2.21032	0.268954	3.7302	0.639861	0.352927	0.326946	0.162357	0.641746	0.0962579	0.776147	2.05676	1.0746	1.62704	0.241791	1.03465	11.6035	2.56685	3.47856	6.7039	1.38091	0.54051	0.387912	0.605551
ENSG00000110321.16	EIF4G2	2765.49	109.609	86.4728	0.788919	0.0166286	108.367	114.612	132.972	67.7104	95.7884	116.409	105.689	82.8217	167.569	96.476	143.522	106.694	99.4767	103.493	101.04	103.729	120.165	90.8236	59.3013	58.9832	40.7124	74.3755	96.3538	115.478	77.2328	105.544	90.4001	89.7485
ENSG00000253873.5	PCDHGA11	51.5927	1.32101	2.65982	2.01348	0.00129171	1.26478	0.233751	0.796501	1.48193	0.81977	0.790962	1.74181	1.35486	1.4476	0.540716	0.84541	2.61184	0.710692	2.85013	0.824346	4.14225	1.50322	1.35592	5.99799	3.1359	3.7551	2.15703	2.38531	1.9103	1.75285	0.932524	2.74333	1.50593
ENSG00000140678.16	ITGAX	180.247	4.81184	8.52843	1.77238	0.0122311	3.71251	2.23553	5.00255	7.41466	9.29782	4.88544	6.20725	8.03553	3.75999	2.78236	3.8842	3.20438	2.22882	2.65603	5.37055	3.91595	13.5701	8.25191	6.28252	4.75817	15.6635	5.38334	9.59313	19.7504	3.55749	10.0464	3.86519	4.93144
ENSG00000206560.11	ANKRD28	232.954	7.50489	9.47542	1.26257	0.0161345	6.67658	6.59594	5.81085	5.61676	9.75239	8.89804	6.60994	9.86505	7.31579	6.43658	9.14677	6.88956	5.90159	5.14921	10.4083	7.73825	8.34938	9.50474	7.81292	5.59695	9.18114	11.3795	13.0696	7.7902	13.7043	9.68132	10.7563	7.31579
ENSG00000131368.7	MRPS25	326.209	10.2227	13.5129	1.32185	0.0154585	8.81426	7.61989	5.5982	13.3662	15.2451	10.3551	8.14213	11.4299	7.23268	8.02377	10.0591	12.3468	10.3221	7.78066	15.5051	10.6007	7.58991	11.2277	19.1668	13.3991	17.4877	9.58887	11.8853	12.4264	15.0683	10.7796	20.6106	14.5369
ENSG00000123569.8	H2BFWT	11.7916	0.291687	0.785867	2.69421	0.0784647	0.195841	0	0	0.338158	0	0.311752	0.362483	0.11907	0.431186	0	0.180262	0	0.121629	0.291896	0.523026	0.663511	0	0.839811	1.46643	0.672326	0.787765	0.427681	0	0	2.32641	0.163906	1.56843	0
ENSG00000197506.7	SLC28A3	130.345	6.60187	2.62437	0.39752	0.0122182	4.59922	3.12347	23.7672	14.42	7.97595	6.52315	9.00877	1.51378	8.05781	4.15747	6.97074	2.08644	2.21209	1.72664	1.3853	2.51893	1.31921	1.31607	1.37236	1.30588	5.28579	3.02072	0.913043	2.86671	5.751	1.9391	3.0464	2.16163
ENSG00000156049.6	GNA14	31.1699	0.891921	1.58393	1.77586	0.0588818	0.450412	0.272432	0.711239	1.05548	1.05097	0.409712	1.07186	0.978024	0.873624	0.602794	1.15491	1.13233	0.639388	0.143856	1.33178	1.2644	1.14899	1.17268	0.867248	1.25175	2.58825	1.63	3.39782	2.96856	1.75801	0.269262	0.772973	0.201108
ENSG00000111596.12	CNOT2	305.19	12.2488	9.55828	0.780341	0.00972315	9.64682	10.6128	9.6615	10.2082	14.2622	10.4169	11.203	9.90463	13.7832	15.0622	14.8624	14.375	10.7314	9.08205	18.4204	10.0721	8.27186	8.87315	9.97788	5.66996	5.85501	10.6127	13.2937	7.31483	9.25977	7.82245	15.9327	10.0015
ENSG00000099998.17	GGT5	73.035	1.97998	3.54888	1.79238	0.0211319	1.47492	0.530599	2.19202	1.99744	3.3638	1.1279	1.3382	4.32545	2.76981	0.903095	1.06478	2.6537	0.664557	1.93971	1.85366	1.0582	6.51394	3.25541	1.88398	2.68064	2.24905	2.41256	7.14715	5.44117	0.961919	5.88162	3.47417	1.87557
ENSG00000106714.17	CNTNAP3	48.7824	1.17648	2.6104	2.21882	0.0128042	0.790727	0.778581	1.05988	2.30204	0.318559	0.980639	0.672217	0.872068	0.431866	1.69401	0.203115	1.64115	1.7131	1.3019	1.38738	1.3208	11.284	1.17299	3.52498	0.631298	2.4903	2.29705	1.24296	2.1077	2.79609	1.09272	1.8409	0.833382
ENSG00000138696.10	BMPR1B	45.5329	0.969999	2.59869	2.67906	0.0450713	0.249641	0.39147	1.50017	1.72422	2.25155	0.17662	0.680258	0.0843221	0.223927	1.45085	0.127657	1.46438	0.0861343	0.620141	2.01865	2.7911	2.87056	0.475786	0.186928	3.9677	0.0371917	2.84701	3.4568	0.559868	0.659001	3.71438	2.83234	8.08427
ENSG00000168421.12	RHOH	57.9332	1.54629	2.88761	1.86745	0.0164814	1.82818	0.766565	1.20286	1.09799	1.54745	1.75035	0.490405	5.07433	1.39033	1.3445	0.707246	1.36548	0.954401	0.493635	1.68056	1.55296	3.37639	3.86303	0.575344	0.636715	3.76573	3.40224	6.49198	4.41201	1.63665	2.26185	2.73199	1.53201
ENSG00000103043.14	VAC14	257.704	8.36982	10.3813	1.24032	0.0122051	7.70055	7.49408	6.99023	12.2372	13.2562	6.63426	4.59111	9.78819	7.98815	8.5551	7.974	8.90833	4.8219	6.5428	10.5653	11.0307	9.94217	7.72246	13.0212	11.9108	12.6794	9.24914	9.76383	10.0193	10.9821	8.18003	9.55142	9.60405
ENSG00000164080.13	RAD54L2	194.232	6.2283	7.96979	1.27961	0.0169918	8.19319	5.91629	3.91842	6.93413	5.83577	5.78496	4.85111	7.02572	5.52811	6.8892	6.43997	6.12756	4.91518	5.81043	7.75453	5.61142	5.13067	7.50067	9.82913	12.333	12.4031	6.10524	8.0173	7.8114	7.9362	6.40249	7.46713	5.75944
ENSG00000123146.19	ADGRE5	217.087	6.04439	9.94006	1.64451	0.0165063	5.10736	3.83361	5.85609	9.3244	7.79302	5.92937	4.77178	10.8584	6.80428	5.94276	3.09913	10.5908	2.40423	1.96371	4.88697	5.18012	21.6254	8.23052	12.5691	9.79057	17.0984	8.93706	10.4102	12.6398	5.64199	7.0244	5.11291	3.66031
ENSG00000140285.9	FGF7	40.8142	0.741082	2.49984	3.37324	0.000110351	0.315605	0.0556773	0.311479	0.386009	1.43192	1.04667	0.328587	1.45513	0.916846	0.225855	0.447853	0.264474	0.849371	0.509601	1.07115	1.75539	2.32686	0.803573	1.98903	1.7757	1.30478	5.10026	7.49971	3.09032	2.6556	1.4968	0.947842	0.452109
ENSG00000116604.17	MEF2D	401.338	12.9522	16.1427	1.24634	0.0161008	13.8424	9.20818	10.0652	11.3131	13.486	10.8652	14.6333	16.067	13.532	13.7965	9.88331	16.5401	10.177	10.9071	18.466	15.9417	14.8771	11.3792	12.987	12.7725	18.8537	22.4748	21.8136	18.0244	20.3106	14.1495	12.4881	12.4834
ENSG00000150594.6	ADRA2A	42.5727	0.858781	2.49931	2.9103	0.0159622	0.654511	0.494851	0.553676	0.282535	0.532207	1.22795	0.194695	2.70029	0.840612	0.14599	0.21516	0.352591	0.958153	0.418086	1.81041	2.10662	0.303572	1.32817	0.280051	1.33747	3.32229	4.921	7.65313	5.99877	1.94374	1.09557	0.60842	0.292238
ENSG00000100079.6	LGALS2	43.4544	0.932708	2.48183	2.66088	0.0268876	0.634354	1.93976	1.08517	0.547668	0.732609	0.168301	0.391376	3.47114	0.85352	0.660307	0.486578	0.531583	0	0	0.988254	0.573119	8.58149	0.906752	0.791661	0.241972	3.68575	2.49357	2.90317	5.18254	3.01421	0.353943	1.90513	0.330444
ENSG00000074660.15	SCARF1	55.8011	1.69689	2.54983	1.50265	0.014881	1.23521	0.672403	1.85297	2.52892	2.06119	2.191	1.32276	1.95259	1.29504	1.6531	1.55925	1.597	1.18358	1.10463	1.74367	1.32721	2.93615	2.23224	2.06122	2.34237	5.25251	1.94218	3.24272	4.274	1.25769	1.97897	1.48386	1.51667
ENSG00000104237.9	RP1	6.26586	0.383453	0.254928	0.664821	0.0313848	0.022927	0.541983	0.135764	0.385982	0.334759	0.255476	0.217483	0.45303	0.180882	0.125291	0.337651	0.576378	0.192226	0.0939732	0.397997	0.0815606	0.0604801	0.196632	0.214593	0.0787087	0.215187	0.11015	0.338995	0.0495817	0.16341	0.11513	0.183615	0.206017
ENSG00000164038.14	SLC9B2	66.2133	1.96581	3.04047	1.54668	0.00695427	1.53123	1.5863	1.50479	1.2376	1.45127	4.12303	0.723616	1.80253	2.19974	1.57692	1.4844	1.18761	2.79225	1.67528	3.11056	2.82571	2.73694	1.4844	1.51249	1.8641	2.31522	3.75659	2.89029	2.27808	3.44441	3.38109	6.78387	2.95297
ENSG00000090674.15	MCOLN1	94.1721	2.99541	4.00315	1.33643	0.010745	2.83246	1.96752	2.11405	3.09496	3.81151	2.184	1.35161	2.77153	3.75152	3.90426	3.62557	2.1696	2.77612	2.4077	4.66876	3.11884	3.41264	3.77198	3.7116	7.39422	4.80664	3.78868	3.78607	4.17936	3.73272	2.77804	2.5254	3.73479
ENSG00000166902.4	MRPL16	310.137	9.86286	12.6919	1.28683	0.0209445	8.17202	7.34432	9.28259	12.5797	8.39479	8.46796	8.24062	7.49965	14.824	10.5326	8.12514	9.8845	13.9331	8.04353	11.1183	11.5971	14.3611	17.6457	15.875	17.6445	7.75278	15.0851	9.11927	11.8374	9.52443	14.2596	7.48629	11.5058
ENSG00000261371.5	PECAM1	441.054	12.6954	19.494	1.53551	0.0183832	8.75522	7.03804	12.6226	9.37057	15.8259	19.8101	12.3104	19.6461	20.6759	9.42462	10.3331	12.5368	7.69378	8.86218	14.0264	20.4123	19.8356	20.8526	6.94441	11.026	13.494	33.7258	39.7035	26.0749	18.2007	14.3718	14.7509	12.7301
ENSG00000126062.3	TMEM115	174.115	5.42367	7.35079	1.35532	0.020058	4.70179	5.34231	4.87627	7.15533	6.07428	4.69374	4.13003	6.83168	5.7901	4.04389	6.74839	6.2106	4.70182	3.97906	4.57582	6.72287	5.85385	5.16874	7.57832	12.4024	12.3948	5.81265	5.55486	8.3872	8.99325	7.20323	3.82933	4.3588
ENSG00000156206.13	CFAP161	38.6018	1.87687	1.01913	0.542995	0.033692	1.59246	0.437006	0.873133	1.22208	1.22607	0.774576	1.80124	0.430311	1.52582	3.31521	3.21658	3.33616	0.604393	3.75807	2.53994	0.899209	1.72341	0.521646	0.529961	0.607437	0.830358	0.734168	1.3081	0.510198	1.05094	0.740436	1.59418	0.898662
ENSG00000213020.9	ZNF611	169.841	5.23083	7.2445	1.38496	0.0250032	5.38864	5.68652	2.58174	5.64616	6.61931	2.65138	0.986051	7.77363	3.03797	2.71531	7.31599	7.60474	5.23295	6.29753	7.42458	8.21554	4.84103	6.06578	6.7677	11.1276	6.56838	8.25887	8.07104	5.56186	3.9862	6.88792	6.4979	10.0287
ENSG00000103248.18	MTHFSD	127.148	4.07785	5.29075	1.29744	0.0151969	3.97971	3.34838	3.18243	6.45328	2.91677	3.53307	3.01017	5.25804	3.85686	4.87942	4.485	2.91809	3.4381	2.88978	5.51864	6.5515	2.86787	3.92461	6.24645	8.43684	5.78077	4.67976	5.19999	3.86189	5.48514	4.0567	4.8268	5.56146
ENSG00000167613.15	LAIR1	58.7132	1.58824	2.8992	1.82542	0.0135025	0.694166	1.37769	1.43869	1.64809	1.25621	1.32948	0.843173	4.40512	2.2607	0.863692	0.968405	1.88145	1.45502	0.59815	1.30351	1.24207	4.90367	2.59302	1.0883	0.84401	3.66485	2.88028	6.4149	5.01963	1.64921	2.75962	1.19439	2.13571
ENSG00000283378.1	CNTNAP3C	45.1323	1.05304	2.47206	2.34755	0.0149522	0.810564	0.142995	0.399984	3.49899	0.250744	0.967731	0.890789	0.677621	0.223079	0.949191	0.233152	1.01887	1.82485	0.377539	2.02945	0.549239	9.16968	0.597418	2.27602	0.92756	5.97753	2.0799	1.49811	1.899	2.52754	0.593591	2.02861	0.712521
ENSG00000128512.20	DOCK4	186.314	5.322	8.40649	1.57957	0.0362684	3.39536	7.83254	5.06703	7.82138	6.61666	3.79316	3.73405	7.16505	5.02286	3.54219	2.7749	5.89471	3.99048	4.77703	6.90257	3.02289	14.4717	10.6752	3.52288	15.4198	8.57437	7.44146	10.3558	6.68423	4.1238	14.132	4.80134	4.75881
ENSG00000121742.17	GJB6	1617.07	81.24	30.8668	0.379946	0.111226	112.636	18.8317	224.924	163.753	67.0674	44.8042	153.806	8.2578	104.644	36.4075	172.435	21.7408	4.21763	65.7923	17.7824	25.5606	40.8888	50.6499	36.5091	10.6248	33.9326	36.7517	18.6591	63.2963	20.1678	21.0918	33.0892	8.74716
ENSG00000106617.13	PRKAG2	104.143	3.16713	4.57202	1.44358	0.00670704	3.58476	3.28117	2.50217	1.23347	1.92857	2.08823	3.76226	3.83782	1.76345	5.67825	2.30733	2.67748	6.54997	2.57471	2.23733	4.55885	3.64762	5.20764	4.20139	2.94287	5.46831	8.41845	5.5418	3.82001	3.14748	2.84803	4.03073	4.30303
ENSG00000213380.15	COG8	111.67	3.51147	4.75365	1.35375	0.0304234	4.91169	3.26697	1.70706	3.75355	3.68729	3.25469	2.75124	4.47225	2.73372	2.84375	1.9901	4.04703	3.12342	3.3101	5.31917	5.13557	1.91705	3.27526	5.33195	5.05589	6.05004	3.66437	4.49243	3.20184	5.52754	3.16667	7.85782	5.82106
ENSG00000174004.5	NRROS	28.1049	0.816427	1.43527	1.75799	0.0279955	0.481324	0.127369	0.926313	0.623325	0.893373	1.19719	0.334082	1.90217	1.14805	0.704554	0.249208	0.605019	0.784692	0.448377	0.321364	0.774597	1.88014	0.612759	0.270307	1.44585	2.17813	1.47158	2.47817	2.81913	1.07207	0.654612	1.32508	0.376093
ENSG00000110063.9	DCPS	72.1711	2.31687	3.09369	1.33529	0.0323178	2.22411	1.72641	1.91407	2.49623	1.27696	2.47833	2.1818	4.21898	1.82816	1.77105	1.69917	2.51611	2.09958	2.38678	2.43534	2.15509	3.59245	3.64809	4.39661	3.56319	3.10143	4.0605	3.24155	2.08426	1.10965	3.57396	2.27105	2.12018
ENSG00000147383.10	NSDHL	380.074	15.8876	11.12	0.69992	0.0109382	13.7715	10.894	22.335	13.7071	14.0666	12.2178	17.1284	11.5194	18.508	11.7783	29.1063	26.2415	9.9148	9.8708	15.7541	13.6407	11.6407	6.81768	19.5072	9.63622	10.8203	10.5356	5.00256	13.2154	13.129	11.9663	8.78115	8.56738
ENSG00000261884.2	AC040162.1	26.982	0.902974	1.24903	1.38324	0.00989634	0.769928	0.999684	0.632207	0.877425	0.823128	0.90696	0.242261	1.23581	0.474646	0.552985	0.524426	0.812944	0.688565	1.9279	0.575743	1.45034	1.48734	1.02351	1.38363	0.704848	0.701991	0.887772	1.33356	1.33203	1.64629	0.927909	1.26405	0.794113
ENSG00000149262.16	INTS4	161.895	4.8724	7.04682	1.44627	0.0141418	7.17737	3.35617	5.62132	4.10616	4.20873	3.44139	4.34818	7.71109	4.26267	3.15043	4.15224	5.86965	4.61868	4.03849	5.52342	10.1565	6.4106	5.71684	6.45351	8.64216	11.9425	12.9799	4.99262	4.63366	5.03345	5.18677	4.44383	3.71628
ENSG00000181458.10	TMEM45A	100.364	4.80824	2.38774	0.496592	0.0303035	4.81074	1.13158	1.70347	3.49887	19.5393	2.11176	7.59557	3.61622	8.6019	1.77541	3.75714	3.22509	3.02396	3.58515	2.64744	0.859393	2.56767	2.31301	1.59371	0.133457	2.42377	2.76334	1.78597	1.93361	1.24685	3.12342	5.28296	3.71341
ENSG00000088320.3	REM1	29.9205	0.923756	1.45109	1.57086	0.0520845	0.841234	1.03884	0.705702	0.635492	1.56139	1.08804	0.486576	1.34259	1.23477	0.820922	0.387158	0.52871	0.261227	0.862014	0.561664	1.03316	0.725484	1.24005	1.0236	1.56432	1.83291	1.69932	1.88797	3.03208	1.49896	0.704059	1.15795	0.164329
ENSG00000165526.8	RPUSD4	108.959	3.4122	4.6597	1.3656	0.0112555	2.57284	3.23772	2.26836	2.70253	2.44075	3.82257	2.99614	7.19561	2.58057	3.3811	2.30897	4.04253	2.92945	3.19563	4.0082	2.83296	4.99454	5.07975	7.80237	5.20143	3.33474	4.38252	4.57405	4.29665	2.1394	5.74214	4.80785	4.0877
ENSG00000132514.13	CLEC10A	38.8407	0.728583	2.36246	3.24254	0.0119619	0.212736	1.00079	0.447904	0.612217	0.666863	0.451529	0.262503	2.8024	0.494406	0.276799	0.358992	0.80222	0.176162	0.105693	0.75753	0.816852	7.74149	1.21635	1.48674	0.649179	2.56718	4.21217	4.34376	3.68049	1.34779	0.356093	0.993845	0
ENSG00000179051.13	RCC2	1731.97	66.9753	56.1643	0.838582	0.0184789	51.557	58.2406	69.9213	52.4615	66.1585	63.4959	62.5578	73.683	68.0461	85.5017	78.9759	46.7247	85.8344	62.4559	77.5154	40.3839	56.1756	46.6742	68.5362	71.4783	48.817	58.3066	46.5635	47.3517	67.8483	65.9502	46.2605	64.4895
ENSG00000138688.15	KIAA1109	437.541	14.0078	17.7096	1.26427	0.0208731	12.8467	11.365	16.0587	13.2474	16.3324	13.0163	9.4867	20.8528	13.1632	9.58854	6.21945	18.879	17.147	13.87	16.5437	18.0446	14.0895	15.1341	12.905	11.9899	21.113	20.4753	21.0835	16.0059	16.7441	15.2474	25.5416	20.5507
ENSG00000133943.20	DGLUCY	315.997	9.54636	13.5078	1.41497	0.0217642	10.4874	6.52686	7.63816	15.6773	4.87837	12.9267	6.23451	11.8669	5.21136	10.8596	4.42438	12.5417	10.961	8.1051	13.3559	6.08641	8.73899	13.8327	12.1065	18.1407	18.7491	13.2433	23.1778	12.1275	11.9102	11.0123	17.1335	8.04283
ENSG00000197172.10	MAGEA6	183.106	10.3581	2.34877	0.226756	0.00552953	1.87957	0.0663166	0.0371	14.4422	21.6759	3.81482	11.3064	6.51374	2.51745	5.20909	36.2014	0.236259	6.12843	17.9293	25.9142	13.723	0	0.201501	0.0703698	6.12996	0.252017	0.697789	6.55074	0	1.45129	0.157308	0	0
ENSG00000079263.18	SP140	140.22	3.59401	6.85463	1.90723	0.0267279	2.94835	1.48293	3.98706	4.98258	2.99621	5.01791	2.80112	11.4229	3.87875	1.86097	0.822806	3.43006	2.33757	0.818114	3.62291	4.97326	11.8891	8.57451	1.50311	2.69195	11.7756	10.6443	12.356	10.1294	2.31007	5.64393	2.79455	2.52433
ENSG00000158050.4	DUSP2	55.1698	1.67904	2.52186	1.50197	0.0228797	2.17493	1.5987	0.787049	1.643	1.16619	1.37045	0.335465	2.92016	1.03087	2.47615	0.667307	2.27821	0.900504	1.5533	2.78325	1.25882	1.21367	2.81741	3.32497	2.38516	3.88827	2.21651	2.48843	3.91957	1.18415	3.10964	1.27008	2.40752
ENSG00000131375.9	CAPN7	273.149	8.95617	10.8928	1.21624	0.020004	7.94404	9.44596	5.64248	6.80447	11.1147	8.71269	7.64128	12.1699	8.26325	8.64344	9.11137	8.76685	8.76025	8.2743	11.5476	8.61476	8.08537	10.9809	9.36756	7.51592	14.9709	13.0454	14.1044	9.51423	12.3347	9.37095	12.2108	10.1906
ENSG00000066084.12	DIP2B	637.031	26.5619	18.5694	0.699099	0.0224029	43.9014	33.6147	30.506	24.2177	21.98	32.1181	21.7218	15.3082	23.7182	34.9723	13.8352	22.2603	13.0554	48.5592	17.1604	19.0188	11.9328	27.2914	21.1054	12.0471	18.126	16.2371	17.3827	16.8711	23.9074	17.9329	23.9368	14.3129
ENSG00000170100.13	ZNF778	69.9975	2.26595	2.98526	1.31744	0.0317052	2.14329	2.47688	2.09075	2.9231	2.23696	1.75536	1.17861	2.46456	2.24547	2.10972	2.45885	0.761372	1.59154	2.36117	3.69157	3.43078	1.30474	2.13123	4.31453	3.69675	3.64428	2.50308	3.47741	2.10481	2.74897	2.19675	2.96965	2.98534
ENSG00000084070.11	SMAP2	517.258	15.3823	22.2557	1.44684	0.0164049	16.2014	13.1	17.3412	16.1522	18.1142	15.9272	15.8861	28.8767	14.686	11.0295	11.2511	12.1826	10.2417	9.98974	18.254	14.2291	21.8389	18.6354	13.0702	21.2437	27.93	30.2845	44.254	30.9008	16.1527	24.5364	13.4193	11.5291
ENSG00000164164.16	OTUD4	403.76	13.1756	16.0712	1.21977	0.0294758	14.8583	12.0352	16.9655	11.9295	13.7831	12.3631	10.5315	12.7597	12.0927	11.1032	11.4768	13.5897	16.7203	11.1161	14.8099	13.0976	18.0433	13.6151	9.19208	11.9087	16.5374	12.5583	17.7684	13.4754	18.2684	22.0645	20.6622	20.434
ENSG00000110844.13	PRPF40B	185.91	7.65643	5.6818	0.742095	0.0164678	8.75038	5.70382	3.44708	8.67501	6.22126	8.07139	5.44732	8.70161	8.76896	7.87334	10.7078	5.54617	10.6157	6.4244	8.39218	5.97324	2.25714	4.79977	5.37223	11.2863	7.40753	4.84209	4.54246	3.59493	4.66877	5.44609	6.47711	5.89572
ENSG00000276410.3	HIST1H2BB	1611.9	72.0794	41.0394	0.569365	0.00829897	40.4388	139.113	52.9717	32.5324	58.2263	59.2525	96.1122	46.9378	120.568	100.809	55.6216	135.165	52.2275	27.7393	61.9765	49.5094	119.73	6.89703	52.9901	47.3275	19.1007	17.2608	40.2821	29.1509	38.2117	31.5371	46.4631	33.7522
ENSG00000122483.17	CCDC18	246.428	7.7497	10.2294	1.31998	0.0231948	8.17442	11.8876	7.33749	6.46702	5.83047	8.53486	7.65133	10.5825	6.3072	5.36252	10.428	4.61014	7.04573	7.57432	6.95194	9.37207	10.8481	10.4295	9.07662	14.5472	11.7523	6.93696	10.8326	5.93746	7.08899	5.95702	15.8376	13.066
ENSG00000182511.11	FES	81.7883	2.36635	3.77639	1.59587	0.0456142	2.85122	2.74097	1.92491	2.4616	2.20887	2.63117	1.0134	3.54241	2.3958	1.06456	1.31221	3.94754	2.07874	2.52517	1.2967	1.778	3.21985	2.39218	2.84662	5.81624	6.70409	4.67444	6.15347	6.04689	3.63242	2.07504	1.32374	1.13008
ENSG00000136286.15	MYO1G	85.7587	2.40138	4.04138	1.68294	0.0140468	2.08646	1.5148	2.97789	4.2955	2.1349	2.37924	1.36464	6.08659	2.61345	1.70717	0.886378	2.01742	1.17121	1.06152	2.22353	2.27021	5.43882	2.89279	2.04302	2.84677	7.82783	4.02194	5.44537	7.37564	3.07431	4.66781	2.18914	1.14434
ENSG00000183484.11	GPR132	68.4205	1.8563	3.33662	1.79746	0.0213715	2.08431	1.05898	1.514	1.87146	1.79504	2.48845	0.887306	3.64965	1.62147	3.05911	0.556367	2.77714	0.750795	0.838784	1.39162	1.22873	3.67116	1.63118	1.71677	2.24205	7.93692	3.20443	5.94352	5.40901	2.575	3.52375	2.21176	0.781737
ENSG00000206053.12	JPT2	814.181	33.14	24.6062	0.742492	0.00675857	24.4923	48.0665	29.8184	35.4748	31.5877	25.8949	27.594	32.4167	34.724	26.4882	25.3663	66.5119	31.2889	26.1612	29.7144	18.5493	29.5664	27.8122	22.1889	25.3803	14.0813	25.6288	18.6538	22.7379	38.0804	24.1557	28.5625	23.1832
ENSG00000110400.10	NECTIN1	1120.15	45.8578	33.4682	0.729825	0.0174938	50.7898	52.493	37.7313	55.5281	43.1429	35.9919	35.2842	25.6825	51.4908	36.0656	65.5207	72.6441	28.7195	60.9776	34.3054	27.9297	42.9318	27.7732	52.7733	35.7467	28.5022	32.5102	13.1101	54.8697	32.4084	37.6558	30.202	17.3736
ENSG00000055147.18	FAM114A2	118.984	3.93748	4.82475	1.22534	0.0184004	2.54207	2.49248	4.89092	3.83493	5.28446	3.85495	4.77942	5.33624	3.7902	3.21706	2.77088	3.19535	4.66984	3.33024	3.57317	5.36698	6.39634	4.67595	4.6084	2.97023	4.55659	5.119	6.1043	4.99594	3.90977	4.2551	3.88421	4.57895
ENSG00000018189.12	RUFY3	385.538	11.9188	16.1197	1.35247	0.019423	13.0172	11.6199	13.3866	10.8638	12.3811	10.7062	7.52927	14.7867	16.0896	8.28231	10.4441	9.05391	18.217	8.50449	12.3994	15.4947	9.42994	17.2928	12.3301	25.82	27.7225	17.3975	18.1931	14.185	9.45835	10.6041	17.462	12.8667
ENSG00000249437.7	NAIP	23.3151	0.761641	1.13004	1.48369	0.0188006	0.294472	0.207796	0.617572	1.0487	0.619435	0.68849	0.502458	1.20849	0.64159	0.574723	0.567505	0.948502	0.891559	0.425187	0.688131	0.517542	1.26977	1.2529	0.689052	0.673951	1.33257	0.980687	2.11869	1.72473	0.568432	1.00122	0.700129	0.560849
ENSG00000184293.7	CLECL1	41.8631	0.944659	2.34563	2.48305	0.0371818	0.508663	0.717884	0.7229	0.702645	0.503528	1.53847	0.282446	3.71115	0.634628	0.476526	0.28092	0.639383	0.884545	0.45489	0.611311	1.10295	2.14692	2.72658	0.228528	0.232833	4.09217	3.73238	5.80193	6.16017	0.96679	0.596006	0.611058	0.79491
ENSG00000213213.13	CCDC183	15.3469	0.499816	0.819204	1.63901	0.0115186	1.00418	0.0833656	0.396421	0.764962	0.409312	0.89329	0.109332	0.538705	0.368487	0	0.271853	0.148499	0.146742	0.704332	0.157755	1.16074	0.335616	0.538269	1.28268	0.270382	1.34643	0.619186	0.561466	0.894201	0.491182	0.593248	0.887003	0.369242
ENSG00000151789.11	ZNF385D	11.2534	0.356211	0.67002	1.88097	0.00413771	0.154246	0.090704	0.339979	0.199752	0.356273	0.306923	0.172486	0.445455	0.240554	0.160556	0.13606	0.355456	0.159659	0.287374	0.437685	0.335326	0.271261	0.475411	0.375366	0.353019	0.741093	0.668076	2.00915	0.787597	0.549688	0.118336	0.424636	0.301308
ENSG00000114383.9	TUSC2	85.1786	2.75357	3.59038	1.3039	0.0159519	2.91075	2.97829	2.29816	2.76429	2.30509	1.56381	1.75095	4.55701	1.78908	2.55642	2.64572	3.84172	2.93759	1.84382	3.06088	3.25435	3.07136	3.23751	3.10584	5.57924	2.43926	3.84572	4.4575	4.14406	4.49501	2.86243	2.03974	2.84298
ENSG00000090539.15	CHRD	17.029	0.521352	0.923749	1.77183	0.0212791	0.396711	0.186628	0.354983	0.251166	0.589059	0.357856	0.342661	1.12558	0.611412	0.0825882	0.194749	0.797857	0.131403	0.650417	0.247213	0.295693	0.332734	0.86477	1.30703	1.90668	1.5603	0.623769	1.36867	0.648209	0.188502	0.708313	0.635426	0.268648
ENSG00000166002.6	SMCO4	106.66	3.19455	4.73399	1.4819	0.0218912	3.43578	3.13163	2.48664	1.97752	2.9051	2.27887	2.98092	4.17785	4.04497	1.45289	2.30597	6.4781	2.31164	3.20059	3.24978	3.63764	9.2377	3.9903	7.82521	3.76788	5.37458	4.75198	4.08222	3.5087	1.36046	5.51143	3.72614	3.46764
ENSG00000160185.14	UBASH3A	42.4074	1.0185	2.3023	2.26049	0.0120763	0.58137	0.252461	0.847414	1.11968	0.973924	1.21022	0.227628	3.7522	1.08309	0.62843	0.0823267	0.730775	0.777677	0.166638	1.34364	0.757571	2.08718	1.41433	0.803672	1.33057	7.97504	3.22285	4.34526	3.28823	1.16873	0.561426	0.62677	1.04831
ENSG00000019991.16	HGF	16.8467	0.520448	0.910767	1.74997	0.03059	0.142676	0.213947	0.584367	0.0461922	0.485499	0.511023	0.26408	0.520476	0.418844	0.93285	0.377565	0.762205	0.155068	0.332275	0.559654	0.513601	0.448752	1.06114	0.267086	0.285723	0.143478	1.57348	2.03425	1.06707	0.55083	0.597055	0.910549	1.08696
ENSG00000151466.11	SCLT1	178.966	5.70379	7.40071	1.29751	0.0323317	1.77362	4.0676	6.85171	7.82032	7.28413	3.26031	5.89146	8.15178	6.04347	4.3682	5.04337	5.06928	5.95346	4.8937	7.58445	8.6845	8.16633	7.15298	4.37945	4.10758	7.58732	7.54366	8.8084	6.22527	6.47118	6.37942	9.02569	10.3774
ENSG00000187688.14	TRPV2	65.4264	1.84436	3.12008	1.69169	0.0114981	0.616123	0.398541	2.27013	2.48233	2.69374	1.87984	0.950321	4.5576	2.61886	0.64133	1.03971	2.06523	1.46682	1.1479	1.33694	1.40902	5.33432	2.11917	2.57585	1.52762	5.23206	2.35463	6.01905	3.99727	1.52479	3.26582	2.05597	1.84545
ENSG00000187720.14	THSD4	141.793	3.62975	6.93438	1.91043	0.0246649	2.5427	4.45449	1.71517	4.2664	2.88365	2.2438	3.91339	7.23904	3.52532	4.12545	1.11425	3.55745	5.05333	1.28525	5.02661	1.47199	5.32563	7.58518	4.29629	9.24784	7.04099	18.8844	2.97733	12.5995	9.48172	3.99709	2.93282	3.00611
ENSG00000197044.10	ZNF441	65.5745	2.01449	2.93516	1.45702	0.0258175	2.61811	1.82147	0.509499	2.10116	2.19015	2.25994	1.04084	2.89213	2.31386	0.575752	1.3916	2.82742	1.39699	1.67631	3.10213	2.12385	1.82575	2.80677	3.17531	1.98328	3.06545	4.79947	5.02387	3.00374	3.63572	1.32706	2.4733	1.61353
ENSG00000147912.12	FBXO10	18.1093	0.632494	0.878609	1.38912	0.0120303	0.583898	0.453235	0.36881	0.453696	0.491303	0.673877	0.270185	1.22477	0.899905	0.34188	0.456833	0.330278	0.344503	0.587443	0.506804	0.494563	0.3673	0.641621	1.02746	0.668177	0.900341	1.10936	1.29501	0.652412	0.45085	0.952936	0.672211	0.889671
ENSG00000156973.13	PDE6D	132.411	4.34819	5.38368	1.23814	0.0121473	3.07161	3.98821	2.76469	3.9778	3.07101	4.44952	3.43958	6.20014	3.51666	4.55612	3.84509	4.47873	5.37956	6.2263	4.75789	8.40856	6.48219	4.01739	4.59997	5.27245	5.1893	4.80282	4.6714	4.16272	5.1083	5.65563	4.79691	5.52016
ENSG00000106178.6	CCL24	55.6801	1.35058	2.94011	2.17693	0.0664061	3.68892	0.20024	0.336064	2.93983	1.40449	0.903424	0	0.690102	0.208255	1.77223	0.783572	3.56686	0.704933	0.422942	1.13676	0.384557	6.9097	3.65052	4.67452	1.29889	6.08763	2.47875	1.49846	3.06832	3.37084	2.61241	0	0.886898
ENSG00000165699.14	TSC1	194.982	6.40167	7.82747	1.22272	0.0233319	6.24723	7.48307	5.0542	8.41666	6.38604	6.74596	3.31885	6.5139	6.52324	6.44587	4.02886	8.37788	6.71568	7.02058	5.24705	7.03725	6.30611	7.88117	8.17879	11.5317	7.88294	7.76425	8.56257	6.07386	9.58366	5.50329	8.09636	6.05513
ENSG00000135457.9	TFCP2	517.369	20.6452	16.1916	0.784279	0.0188147	15.2802	25.6329	13.8704	19.5907	16.8921	16.5316	16.8296	24.7276	18.668	24.7152	24.1079	24.325	23.6395	20.1836	23.1838	18.9253	10.7873	6.4495	15.9977	17.4857	17.3597	21.5801	21.4045	13.3564	13.4777	8.72991	26.0137	17.6233
ENSG00000106069.22	CHN2	12.0994	0.397704	0.687218	1.72796	0.010882	0.179041	0.0561517	0.28272	0.0686997	0.0787703	0.174172	0.294566	0.834556	0.226298	0.155304	0.128177	0.425098	0.494198	0.177904	0.889905	0.168497	0.468262	0.831748	0.253231	0.865062	0.800207	0.88625	1.36565	0.573617	0.236315	0.33299	0.19915	0.652854
ENSG00000131653.12	TRAF7	692.138	27.8848	21.282	0.763213	0.0109809	31.1629	28.1003	27.0834	51.2834	32.4892	19.6814	21.0794	21.1995	17.246	27.7691	29.1866	24.5128	30.012	30.3159	25.65	26.917	15.4646	15.7007	25.4079	32.7153	21.8595	17.58	17.3005	24.7416	28.3084	16.713	17.9996	14.6587
ENSG00000013503.9	POLR3B	192.977	7.67363	6.2056	0.808691	0.0179781	4.82934	5.64587	6.44506	7.40536	6.97467	6.2534	8.45503	6.96799	6.467	8.8909	10.5988	7.9731	9.4008	6.20426	11.0929	7.26515	4.53417	4.88756	6.0719	6.84615	6.37866	6.61119	4.68174	5.74155	4.96619	6.03262	9.01975	6.33612
ENSG00000170577.7	SIX2	33.3125	0.674497	1.99962	2.9646	0.060179	0.873424	0.7284	0.313457	0.137103	0.393003	0.0631987	0.146966	0.193103	0.728421	0.991808	0.401973	2.595	0.14794	0.532561	0.371099	0.511129	0.257795	2.46859	1.24856	5.17919	1.8099	5.16732	0.251578	0.0572382	0.0943223	2.52527	4.68981	0.434298
ENSG00000179909.15	ZNF154	40.391	0.929291	2.25013	2.42134	0.00128697	0.674216	0.475766	0.326652	0.926041	0.803926	0.756161	0.52469	2.45951	1.01211	0.454575	0.662897	0.61635	0.609058	1.07342	1.064	1.26672	1.25618	1.83985	0.894952	0.946881	1.64365	1.92746	5.4052	1.70106	1.27417	0.94901	0.920384	7.92615
ENSG00000185033.14	SEMA4B	820.969	33.323	24.9172	0.747749	0.047582	41.7587	16.1004	41.9676	38.0156	38.8015	24.3261	36.0786	11.0459	33.8474	43.8183	43.7045	33.2344	40.4927	27.6562	27.4972	25.5864	21.7444	19.7316	27.2827	21.5052	27.1411	24.1	20.349	48.3151	23.0364	23.5087	18.688	21.6356
ENSG00000149781.12	FERMT3	147.725	4.14187	6.79974	1.64171	0.0158102	4.68255	2.86102	4.01268	6.11331	4.35264	3.9088	2.24601	10.5545	4.31664	2.00612	2.47041	3.80431	3.6529	2.59593	3.05013	4.50785	9.61765	5.08118	3.54899	4.24754	14.3946	8.35527	8.98615	10.9086	5.42676	6.06967	3.94447	2.00789
ENSG00000109670.14	FBXW7	312.578	9.94021	12.7904	1.28673	0.0217312	8.20572	6.8483	9.8552	12.82	14.1057	12.133	8.01022	10.2179	10.5852	8.2663	8.07589	7.31932	10.0945	9.25515	11.8108	15.2264	9.80485	11.9267	9.16925	9.20956	18.1752	17.5201	18.416	10.5564	10.0101	16.5881	8.87812	9.49428
ENSG00000170323.8	FABP4	1196.13	77.9904	2.23631	0.0286742	0.0160211	1.12875	0.354005	3.11919	172.596	8.25602	23.4585	334.68	0.610018	521.66	2.05613	86.1761	10.2471	3.66088	0.186931	0.167473	1.82713	0.101798	0.470589	0.187821	0.287039	1.00897	2.1911	3.31142	0.632859	0.148983	0.209932	2.00884	15.3855
ENSG00000168918.13	INPP5D	161.853	4.1124	7.92053	1.92601	0.0089463	3.04543	2.17749	4.60198	5.04958	4.24252	4.55896	2.13713	13.562	3.72263	2.69242	2.06061	3.82806	3.0187	1.75854	3.73002	4.43466	9.98581	7.58921	3.56403	3.7158	15.5223	10.0421	16.8487	15.1784	4.36038	3.1565	3.89672	3.37243
ENSG00000181220.16	ZNF746	157.642	4.97864	6.59714	1.32509	0.017742	8.16756	5.29302	5.60966	3.02205	3.61974	6.13599	3.79863	4.44642	3.40233	3.87132	2.75207	5.78802	5.9654	6.25758	5.04979	8.63331	5.75845	5.03699	6.19378	11.087	7.98996	7.95362	6.3815	5.39206	3.81162	4.22002	6.25747	5.74697
ENSG00000183801.7	OLFML1	43.5245	1.18672	2.19414	1.84891	0.0283215	0.407641	0.179784	1.38798	0.395928	1.76542	0.973363	0.872396	2.1996	3.25347	0.556918	0.820782	1.281	0.632921	1.06326	0.510316	0.984027	2.15067	3.27761	0.953864	0.758029	0.273288	2.93771	4.78957	1.76312	0.968478	3.58228	2.75456	2.03056
ENSG00000142347.17	MYO1F	122.133	3.31661	5.78341	1.74377	0.00940399	2.49853	1.92208	3.26627	3.64232	3.36533	3.43941	3.03249	9.36355	2.9835	2.39824	1.61173	3.2436	1.95875	1.83148	3.69189	2.63666	7.51357	5.22541	3.00566	3.4685	11.5331	5.92148	9.75485	11.6038	3.60055	4.02797	2.95229	2.64039
ENSG00000129450.8	SIGLEC9	27.8255	0.896007	1.32195	1.47538	0.0395525	0.68957	0.778561	0.789445	0.833474	1.2287	0.548851	0.446715	1.25776	1.21459	0.861337	0.952075	0.693424	0.728046	0.411115	0.506443	0.560704	2.23883	1.14585	0.619609	0.631282	2.21902	1.05413	1.74787	1.44155	1.06489	1.61595	0.414191	1.1315
ENSG00000081791.8	DELE1	202.337	6.42076	8.37122	1.30377	0.0104318	3.96663	5.18954	4.70916	6.77417	5.70358	6.08388	4.3676	8.30884	5.4079	5.44745	6.0363	6.04143	13.0368	6.62421	7.11392	7.79853	9.16532	7.49611	7.41456	4.63857	10.5983	8.14393	11.7422	8.76604	7.01638	6.22768	11.1882	7.33
ENSG00000179295.17	PTPN11	851.884	33.2019	27.4351	0.82631	0.0147762	24.8799	29.5192	35.4198	36.0511	32.2419	31.6486	34.78	24.706	37.3057	35.324	43.9659	31.8064	31.0121	31.2492	36.6185	32.6616	26.6089	23.6126	21.2992	21.4817	14.6742	27.9288	21.3793	25.7165	32.8422	28.8558	43.5247	34.7708
ENSG00000146205.13	ANO7	11.5855	0.399266	0.645888	1.61769	0.0358129	0.122972	0.520658	0.0728189	0.159252	0.258678	0.367041	0.113805	0.579437	0.203063	0.0720018	0.282976	0.463724	0.572797	0.412396	0.287366	0.395799	0.424208	0.411979	0.1151	1.40722	0.659537	0.563954	0.0649375	0.332424	0.584318	0.64325	0.677081	0.81674
ENSG00000154237.12	LRRK1	141.961	4.39223	6.0675	1.38142	0.0309814	3.83986	4.07848	2.47408	3.97644	3.12655	5.12281	3.60885	4.79017	5.74205	4.00731	3.1361	6.78983	5.44297	2.15733	6.09056	3.65681	6.01947	3.75395	2.95718	5.91952	8.28308	9.7933	7.90068	5.89459	7.56293	4.04629	8.06648	3.72324
ENSG00000064195.7	DLX3	100.029	4.95849	2.18862	0.441388	0.0104975	1.9346	2.73034	8.17187	8.9636	4.37275	1.48849	12.1746	3.09739	2.57934	2.61788	2.04782	8.83545	9.81226	2.93154	1.11945	0.677294	0.497252	2.38511	2.80064	0.295179	2.24811	3.07004	1.43024	1.3481	3.67701	2.91445	4.19619	1.61242
ENSG00000160883.10	HK3	38.4656	0.938228	2.0917	2.22942	0.00819905	0.532163	0.112658	1.09243	2.57288	1.18528	0.720062	0.738738	1.22949	1.34742	0.332361	0.955172	0.401354	0.561857	0.436247	0.355308	0.739219	6.21999	0.827239	1.6736	1.70513	3.35363	0.883234	2.69777	3.49092	0.505728	2.27147	0.692563	0.831635
ENSG00000079277.20	MKNK1	255.997	8.43009	10.1804	1.20763	0.0289551	9.15545	9.20102	8.47907	9.88979	8.4939	7.82243	8.5934	9.18066	7.08545	8.36699	5.5815	5.20873	9.41839	10.4932	7.9814	12.2752	9.79975	8.39639	11.2255	9.65766	10.5305	11.4183	11.4337	9.41493	15.0251	7.95305	6.71115	7.20467
ENSG00000158517.13	NCF1	47.2706	1.37925	2.26014	1.63867	0.0786482	1.77003	0.892171	1.43745	1.7028	1.50186	1.28807	1.54448	1.99859	1.26192	2.17146	0.48877	0.635689	0.565351	0.376885	1.55322	3.59814	3.94065	1.87047	1.09817	3.58807	3.32263	3.04818	1.54892	2.66128	0.901129	1.52373	0.506273	0.474191
ENSG00000175183.9	CSRP2	191.608	8.13305	5.57019	0.684883	0.0418503	7.48264	11.6122	6.14323	6.61454	6.00536	9.58602	7.89043	4.94813	11.3222	9.68165	2.33239	6.74504	10.4977	15.5738	4.06042	7.87807	2.37131	5.48104	4.06266	6.92519	2.87797	6.65348	5.3524	5.45843	6.09104	4.56588	8.17716	5.21779
ENSG00000165072.9	MAMDC2	36.3667	0.814203	2.07336	2.54648	0.0065298	0.318	1.76314	0.502149	0.902075	0.562125	1.15706	0.525525	0.911466	1.2836	0.602911	0.334519	0.685238	0.253924	0.304696	0.606623	1.33904	0.755902	0.657478	5.64671	2.23539	2.19282	3.7699	2.35095	3.0783	2.26653	0.494271	0.227389	0.638939
ENSG00000114023.15	FAM162A	283.792	12.3584	7.7858	0.629999	0.0389893	17.3558	16.9703	9.11116	7.81088	5.78019	11.3525	16.0834	5.07965	24.7298	6.88282	23.7504	3.88744	11.897	11.0423	12.1427	9.85242	5.7698	7.71971	10.2999	4.64832	5.26077	7.03608	5.07002	9.88252	11.0214	7.14697	7.94799	8.25945
ENSG00000203705.10	TATDN3	94.4904	2.96175	4.06647	1.37299	0.0231267	3.69761	2.44617	1.78814	1.91539	2.40206	4.23063	3.48612	2.89445	3.9179	2.63408	1.40393	1.91724	3.99004	2.96227	3.24026	3.97749	3.30138	5.00461	2.49185	3.06771	2.5409	5.51113	5.41842	2.66547	4.17279	2.28231	3.97924	7.15079
ENSG00000150636.17	CCDC102B	113.824	3.38848	5.06129	1.49368	0.0132051	1.26674	1.128	3.94105	3.35903	5.58308	2.66463	3.00055	3.64913	4.84756	1.83657	3.69226	3.37411	3.5777	4.60773	2.79907	5.32379	4.44322	5.73925	3.52307	4.93548	3.2352	2.89807	11.7221	4.13091	4.26351	2.97861	5.22343	6.08018
ENSG00000112679.14	DUSP22	194.465	6.17627	8.04779	1.30302	0.0182292	8.65247	4.21532	6.07784	5.44971	4.64833	3.3086	5.25756	9.43543	4.53094	3.26925	7.14227	7.2378	8.39519	4.10754	9.41585	7.57382	7.84776	7.57591	7.37807	8.24527	9.70229	10.369	9.46336	9.89971	9.5102	5.51493	5.33275	4.9082
ENSG00000137824.15	RMDN3	174.135	5.63803	7.10495	1.26018	0.0248534	5.27231	4.03451	5.17636	6.97554	4.27016	4.87763	4.87927	6.18207	6.52015	8.28547	7.51572	3.39968	5.57075	4.46491	5.64595	6.72748	7.98914	4.44103	10.2541	8.22725	9.63988	7.10266	6.79761	6.12048	6.71037	5.10026	4.24984	7.70425
ENSG00000165655.16	ZNF503	138.778	5.8811	4.1047	0.697947	0.0156349	8.10806	4.06043	3.82034	5.37425	5.10052	3.62227	8.71388	4.80241	4.05021	9.35181	10.8094	4.66847	3.57363	6.1204	4.54034	2.67613	2.01679	3.9536	4.42611	2.03526	5.2604	3.22145	5.69038	5.12835	3.79051	5.69142	4.45118	3.7195
ENSG00000155465.18	SLC7A7	49.1844	1.38688	2.39856	1.72947	0.0374862	0.887181	0.890912	1.71076	1.67919	1.57067	1.62954	0.363154	2.44804	1.55264	0.612691	0.816609	1.93011	1.33509	0.737449	1.13912	1.00578	4.22368	2.14	0.792062	0.898094	2.05884	3.09991	5.51377	3.09929	0.972819	3.2842	0.819825	1.97301
ENSG00000126785.12	RHOJ	92.4285	2.60912	4.31475	1.65372	0.00527707	1.10782	1.53091	4.4098	2.55049	3.79253	1.80024	1.68737	4.12546	2.8795	1.5135	2.37929	3.42327	1.83472	2.16717	2.4347	2.33018	3.91522	3.85985	3.90567	2.9052	3.96105	4.97969	11.7001	5.92286	3.28997	2.16341	2.86497	2.9936
ENSG00000269713.7	NBPF9	110.431	3.60921	4.54558	1.25944	0.0243236	2.07094	2.36279	2.99513	3.99363	3.8989	3.71259	1.81804	4.42455	4.01986	4.3063	3.37594	3.55196	3.08922	4.70215	4.31609	3.23278	5.49838	3.98386	3.86949	4.56254	7.34417	4.70009	4.39482	3.79495	2.71299	4.5842	5.07641	4.03788
ENSG00000129538.13	RNASE1	285.598	7.54392	13.4799	1.78686	0.0307265	8.60295	4.59408	4.68125	8.63177	9.60939	4.6266	5.21809	5.7253	10.5798	8.71289	3.74529	20.6047	6.57036	4.24529	5.51105	9.01978	21.9392	9.22286	6.44178	8.3813	2.49407	21.4785	13.0149	17.3476	5.24785	19.1679	31.1905	8.99309
ENSG00000169026.12	SLC49A3	36.5759	0.830673	2.07045	2.49249	0.0012024	0.794622	0.841097	0.575106	1.14339	1.01603	0.421644	0.337051	1.20781	0.80187	0.155087	1.34092	0.332943	0.534632	0.838925	0.618967	0.785221	1.18245	1.10035	1.58667	5.60746	2.21969	1.01227	3.21703	3.19821	3.22512	1.3301	0.530323	0.620896
ENSG00000101109.11	STK4	478.786	15.3212	19.3668	1.26406	0.0284736	14.3538	8.54965	14.5775	13.1419	22.8221	14.6801	13.2481	23.0608	9.9963	13.9169	13.6204	15.0597	16.5231	15.9736	18.7936	15.6547	24.9377	21.2414	11.1091	12.3192	19.1425	23.122	26.4477	19.5122	13.5904	19.683	22.906	20.8032
ENSG00000165506.14	DNAAF2	141.119	4.17845	6.24939	1.49562	0.0105307	4.60897	2.25163	3.26575	2.75479	2.60293	4.18577	4.45678	4.67035	4.22819	4.10558	3.10017	2.89671	7.44967	2.90635	7.69314	13.4731	3.09351	5.6379	6.2386	8.99323	4.11988	4.38738	5.55415	3.7058	4.7731	6.23121	5.14635	8.58776
ENSG00000105609.16	LILRB5	38.278	0.969255	2.04147	2.10623	0.00291698	0.823386	0.211283	1.3199	1.96027	0.852122	0.774515	0.704277	1.2136	1.4741	0.545409	0.206697	1.31725	0.495874	0.390484	0.749656	0.752357	3.10871	1.2572	2.69036	2.62683	2.40876	2.20134	2.92503	2.39218	1.80801	1.92119	0.874235	0.272945
ENSG00000214226.8	C17orf67	118.33	3.78522	4.9501	1.30774	0.0221363	4.06829	4.15244	2.12227	4.8922	4.42275	4.22107	1.91612	4.54944	4.77185	4.59393	2.30698	5.29642	3.20342	2.86942	1.89168	4.23347	3.09575	6.26957	4.18864	6.90012	5.45487	4.98162	3.98975	3.45638	4.31495	4.74254	7.56359	3.86003
ENSG00000165140.10	FBP1	37.6678	0.931349	2.03828	2.18852	0.0408677	1.30883	0.639408	0.397454	0.521529	0.597979	0.560939	0.139761	1.22425	1.62556	1.33618	2.50211	0.253106	0.750334	0.0750302	0.537763	0.818648	6.57839	1.61901	0.678488	5.87579	0.269987	1.40714	1.48863	1.45153	1.31558	0.252787	2.41893	1.02269
ENSG00000145362.17	ANK2	35.8441	0.819745	2.02676	2.47243	0.00144638	0.317038	0.481338	0.405813	0.953851	0.494531	0.581148	0.195602	1.82826	0.98711	0.187505	0.866613	1.41291	0.375898	0.82336	0.885189	0.800713	0.584845	0.98875	2.54659	1.79201	2.06105	3.32749	4.9109	2.15383	1.1869	0.52264	3.48158	0.690626
ENSG00000105639.18	JAK3	193.861	4.88491	9.49133	1.94299	0.0155451	3.62344	4.15272	4.77825	5.85723	4.5917	5.56349	1.8907	14.8587	4.11149	2.78864	1.86866	5.36218	2.64937	2.96845	6.70871	3.42168	9.10477	5.68906	3.7138	13.3216	18.1587	7.56501	20.4369	20.4515	7.29596	6.34479	3.19003	3.39349
ENSG00000131668.13	BARX1	153.357	8.68528	1.99058	0.22919	0.0098264	6.50275	19.8845	0.116686	0.93569	2.48706	20.3109	1.18536	2.99516	27.1883	4.84584	7.30048	23.7786	0.244763	10.2796	0.723613	0.333809	0.0399858	0	0.0737755	8.0051	0.396321	1.72132	2.60143	0.142049	0.234081	6.18454	4.53714	0.307944
ENSG00000186787.8	SPIN2B	83.8569	2.48249	3.8015	1.53133	0.0264085	1.89662	1.50566	0.421161	2.0468	3.6376	3.01916	0.822765	3.1711	2.52289	0.370165	2.45496	2.83103	2.79754	3.88694	4.35294	7.1085	1.97241	4.38427	2.92909	3.11992	6.35759	3.46882	4.75732	2.64896	2.25301	2.0834	4.62803	2.40819
ENSG00000117139.17	KDM5B	340.659	13.7872	10.5115	0.76241	0.0308959	11.9057	6.59221	12.5699	12.5857	12.2811	8.83543	20.681	8.79322	11.9547	12.1094	20.1583	18.4091	14.8555	16.1572	17.4202	11.182	5.46322	9.92444	9.49736	8.53834	8.66201	14.3591	8.8161	8.59216	11.8125	10.5645	13.1173	14.821
ENSG00000104972.15	LILRB1	81.2806	2.08051	4.06715	1.95488	0.0282034	2.55211	1.23351	2.16681	2.77684	1.43621	3.25566	0.938272	5.29265	2.19373	1.5557	1.12628	1.49412	1.41131	0.54713	1.7273	2.07281	9.93178	3.26072	1.07329	1.52025	7.3595	4.50449	5.72304	7.81253	1.86884	3.68671	1.11995	1.63903
ENSG00000010319.6	SEMA3G	34.2479	1.00702	1.6879	1.67613	0.031392	1.04818	0.961558	0.551724	0.271484	0.501508	1.25143	0.87304	1.99683	0.461561	1.36383	0.739684	0.57094	0.650983	1.40606	0.956446	1.36132	0.411213	1.36719	1.51741	2.23903	2.01445	2.74686	3.91148	1.1334	1.12063	0.438632	1.64394	0.73712
ENSG00000141968.7	VAV1	158.267	4.38225	7.33336	1.67342	0.0254096	6.22242	5.16576	3.01836	4.91566	4.04601	6.95957	3.1051	10.1874	2.99967	4.19099	1.64711	3.22062	1.97013	1.69727	4.88765	3.80296	8.41764	6.27839	8.46586	4.00241	13.7962	9.46764	12.1125	13.5152	3.57505	4.6972	3.58279	2.31979
ENSG00000068001.13	HYAL2	59.85	1.93983	2.58096	1.3305	0.0185042	1.92609	1.27761	2.15944	2.3613	1.81132	1.13445	1.60426	2.59972	2.24758	1.59389	2.092	2.08212	1.02874	1.49281	2.18618	1.61835	2.07927	1.50736	2.24988	4.76086	2.94411	1.96852	3.01063	3.55443	2.24226	2.06338	2.23669	2.01669
ENSG00000276231.4	PIK3R6	43.8562	1.14107	2.27231	1.99138	0.00758084	0.786001	1.03997	0.911479	1.35718	1.02121	1.01661	0.454629	3.64385	0.865276	0.575267	0.655651	1.42024	0.671209	0.475928	0.721582	1.01526	2.59178	1.68528	1.58172	1.51783	6.12574	1.99541	4.30626	3.54125	1.34219	0.945635	1.1311	0.460619
ENSG00000171608.15	PIK3CD	162.575	4.47407	7.55879	1.68947	0.0237804	3.34569	1.77556	8.25215	6.13506	4.95418	3.03707	2.67405	10.3725	4.12957	2.82779	1.42525	5.80427	2.81628	3.66788	4.39377	2.61366	12.3998	5.8248	2.9607	3.10085	12.9018	6.53348	9.49078	15.2879	4.13859	9.76573	4.81637	7.12971
ENSG00000176978.13	DPP7	357.316	9.97954	16.1864	1.62196	0.0230387	13.7209	13.2748	6.05389	10.8275	6.11517	13.3423	3.59109	13.1739	9.45475	11.1479	10.315	10.6916	8.21303	9.06865	9.20248	17.4378	9.32279	9.28505	21.4314	38.7918	30.1351	12.4737	11.147	14.5007	18.2905	6.85896	7.27191	12.1765
ENSG00000002330.13	BAD	272.587	10.9168	8.58726	0.786609	0.0208575	8.50807	13.1649	14.6085	14.1599	8.01629	9.38268	7.06746	8.289	8.12488	11.6837	12.0772	11.8542	14.3241	9.01426	11.9771	9.2033	7.07219	7.14306	6.83127	10.088	8.93385	11.5062	5.62957	10.7146	11.0809	11.8393	4.92567	5.36643
ENSG00000119397.16	CNTRL	416.936	12.5295	17.8303	1.42307	0.0156626	11.0065	23.2218	8.18368	18.8283	7.72065	13.999	6.75339	21.5225	10.9977	8.62164	5.25374	15.1905	7.28601	14.4375	13.4188	14.5003	19.9424	24.1374	15.5364	31.8497	20.9651	19.0504	20.5193	13.6034	13.406	8.35593	16.7883	11.8398
ENSG00000113119.12	TMCO6	106.118	3.3697	4.49021	1.33253	0.0177197	3.24966	2.57538	2.46706	5.05006	2.59823	3.06402	2.56786	4.04272	2.84359	2.30278	3.24426	2.76508	4.78165	2.71983	4.77332	3.92968	3.28694	3.69821	6.4389	7.60907	5.76495	2.99152	4.01289	3.9283	2.7319	2.80344	4.95485	4.92213
ENSG00000116337.15	AMPD2	118.394	3.68525	5.07043	1.37587	0.0226283	6.38947	2.02805	3.39356	3.41171	4.29285	4.41159	3.15843	4.33718	3.60641	2.42396	2.86975	2.74167	3.26702	4.22623	3.22095	4.43384	3.25958	3.13609	6.26385	7.63473	9.18648	5.06583	4.60716	5.7713	3.87125	5.39053	2.46608	3.52887
ENSG00000043462.11	LCP2	287.056	7.78469	13.3143	1.71032	0.0455453	3.8429	6.03754	9.4936	10.6001	11.3764	7.88719	6.21815	15.8555	8.71819	6.01905	5.42818	7.83814	4.12788	3.71043	8.1169	6.35431	29.7108	20.9489	5.12162	3.42957	13.1247	10.0812	22.1309	20.1755	5.97184	17.5782	7.79093	9.36703
ENSG00000184602.5	SNN	210.794	8.97537	6.07415	0.676758	0.0352914	12.1585	2.64852	6.13541	9.99495	8.39883	4.20752	9.90671	9.35278	15.344	5.15865	10.6074	7.97375	16.4811	7.20936	7.55308	7.21772	4.54819	4.61877	6.7687	3.5086	5.88303	8.68131	7.87206	10.7462	4.14454	4.07034	5.55662	4.04794
ENSG00000100629.16	CEP128	209.19	6.35692	8.97203	1.41138	0.0299855	5.19657	2.1818	4.20586	9.18195	4.25911	11.1038	4.83504	10.6222	7.79163	6.90688	3.69455	4.65905	5.49463	6.37119	7.34955	8.29188	8.48122	9.14527	4.04454	11.4031	12.0124	7.2646	14.5961	6.14939	3.82773	12.0655	8.85682	9.19788
ENSG00000066827.15	ZFAT	112.283	3.63068	4.66327	1.28441	0.0165754	4.81967	3.60926	2.9899	2.51361	2.44393	5.58979	2.73084	4.41341	2.38218	2.77974	3.25931	4.27787	4.26391	2.56557	4.32122	3.96563	2.97791	4.04921	7.04105	4.09711	4.43131	6.8307	5.27719	5.34621	4.3933	3.63861	3.93869	3.33556
ENSG00000106066.14	CPVL	116.912	3.16529	5.55638	1.75541	0.018981	1.10081	2.88525	2.83505	1.85551	2.72425	2.12785	5.31205	8.28638	2.84686	1.47324	1.30275	2.56974	5.76235	1.99232	2.90491	3.64077	9.63707	6.43455	2.31582	2.03952	4.428	10.2799	8.41505	10.1648	2.98894	2.63232	2.09906	5.85718
ENSG00000144596.12	GRIP2	20.9628	0.639782	1.0897	1.70323	0.012557	0.353552	0.0935575	1.77373	0.902996	0.488517	0.621432	0.272663	0.528434	0.994649	0.67853	0.108476	0.370342	0.155533	0.537939	0.216384	0.309441	0.819058	1.08181	1.34574	0.92717	1.20488	0.540466	1.63361	1.26369	0.31499	2.20692	0.516156	0.702149
ENSG00000198730.8	CTR9	444.181	17.5594	14.1223	0.804262	0.0257203	19.4955	9.92319	21.0357	15.0253	18.7522	19.7028	23.7291	16.2693	22.5279	13.6774	20.1243	12.0519	18.4775	13.8143	17.2842	19.5396	18.5596	17.0691	11.2911	10.2072	11.3364	18.1212	12.7958	16.5669	13.7365	10.6021	13.0887	9.37604
ENSG00000183718.5	TRIM52	161.935	4.92585	6.98826	1.41869	0.0223502	5.68309	3.10658	2.19085	6.31162	4.15986	5.03302	2.45687	8.19206	3.76943	3.43688	5.80815	5.50021	5.88254	5.20956	5.64708	7.74694	6.03132	5.90667	9.82943	6.62551	14.1668	6.29282	8.70726	5.69311	3.96184	4.97969	6.43714	3.16888
ENSG00000106511.5	MEOX2	37.9156	0.989387	1.99037	2.01172	0.02127	0.490229	0.840125	1.63117	0.302313	0.935897	1.00334	0.518495	1.83091	1.54192	0.765427	0.483464	0.704242	0.69591	0.52191	1.07545	1.16263	1.08003	2.47761	1.15367	2.16381	3.00485	3.63995	3.62423	2.57469	2.07981	0.761968	0.140217	0.711381
ENSG00000183624.13	HMCES	416.573	16.6665	13.0289	0.781742	0.0183191	23.4029	20.1992	15.9941	14.7191	12.7355	9.76424	15.0502	20.4634	18.3067	14.6359	20.3832	12.7316	16.6444	13.2212	20.2458	17.5204	12.2042	7.41888	14.0379	7.34316	14.7618	21.2125	12.0925	9.25148	15.2454	10.2146	16.9415	9.8314
ENSG00000163492.15	CCDC141	34.4081	0.760662	1.98448	2.60888	0.00282647	0.464739	0.215965	0.590669	1.04711	0.577864	1.09166	0.215047	2.37761	0.494974	0.60174	0.135634	0.470186	0.401265	0.430814	0.794647	0.748866	0.846438	2.02936	1.23919	1.36198	5.82098	2.01991	4.83643	3.02329	0.848296	0.445877	0.817012	0.46056
ENSG00000152784.15	PRDM8	24.2033	0.69096	1.27992	1.85237	0.0191518	0.305286	0.0807854	1.26544	1.18606	0.774399	0.212614	0.300186	1.02086	0.35008	0.506456	0.351252	1.24716	0.308101	0.369705	0.58601	0.413725	2.07527	1.35005	0.428615	0.524027	1.63734	0.783362	2.65999	2.72337	0.815966	0.958145	0.611235	0.357813
ENSG00000161929.14	SCIMP	35.1154	0.842282	1.9447	2.30885	0.0276607	0.915351	0.381683	0.640583	0.395133	0.803144	0.496744	0.288789	2.85852	1.14508	0.617155	0.421269	0.889089	0.775208	0.0620141	0.444473	0.944462	4.66044	1.98492	0.218083	0.476124	2.28729	2.03531	3.99876	4.76887	0.790801	0.45269	0.583128	0.780251
ENSG00000182578.13	CSF1R	211.229	5.55704	10.0518	1.80884	0.02559	2.6852	8.03505	4.56219	5.54622	6.4097	4.19331	3.90054	12.8333	6.90986	2.83928	3.28504	9.01494	5.29853	2.93834	3.40409	4.32994	18.9535	8.19879	4.86117	4.47303	13.171	14.5338	22.4002	17.666	4.03768	7.93681	4.93388	3.87757
ENSG00000138286.14	FAM149B1	106.908	3.48856	4.41385	1.26524	0.0155694	5.248	2.794	2.93191	2.89246	3.2121	2.96496	3.93529	5.52681	2.91445	1.79245	2.7064	3.68118	4.64161	2.42692	3.15978	3.04805	3.91738	5.07359	3.263	4.42369	4.1466	4.35916	6.48285	3.64799	4.3138	3.11771	4.9957	5.29056
ENSG00000028277.21	POU2F2	130.279	3.53511	6.15787	1.74192	0.0386776	4.3423	2.20621	2.66656	3.94886	3.90683	5.34556	1.43776	5.90205	2.71944	2.87771	1.49217	6.08895	2.15746	2.02793	4.40681	3.92314	5.14583	5.07934	1.60406	1.67844	8.3582	5.82456	12.2091	9.01501	5.04362	14.2785	3.51625	3.07628
ENSG00000174600.13	CMKLR1	89.2475	2.29159	4.43644	1.93597	0.0087288	1.50773	0.911953	2.59949	3.55975	2.04078	1.8858	1.63738	6.24845	3.42122	1.68152	0.991285	1.8952	1.47147	1.39879	1.62299	1.72011	10.7893	3.74406	2.25794	2.1479	4.37327	4.55591	10.5616	6.45468	2.12001	3.68262	2.18705	1.77917
ENSG00000158805.11	ZNF276	364.696	10.3074	16.3758	1.58873	0.0121332	13.2013	6.32129	8.31975	21.1664	8.63421	11.5393	8.33383	15.4219	9.37707	10.5821	9.2761	4.23735	7.0275	6.79882	12.8748	16.6764	9.11743	8.28933	23.8651	22.9299	39.8895	14.1469	14.6892	14.3255	16.4099	9.66754	13.2156	8.3626
ENSG00000112715.21	VEGFA	1119.4	48.3625	30.5202	0.631071	0.0114327	38.2897	41.5907	29.4794	41.9815	53.2697	45.2022	40.9481	23.3904	29.0626	101.932	61.0179	18.4985	66.9851	70.6863	61.6033	33.2823	19.2617	31.3718	49.1564	57.3806	65.834	13.7826	21.1933	22.634	14.7436	26.8167	22.117	17.8885
ENSG00000099290.16	WASHC2A	428.435	13.939	17.0885	1.22596	0.0294726	11.0296	12.8122	14.7238	13.0676	14.0257	16.9633	11.5107	16.6719	11.6439	19.7647	12.62	7.50791	15.4915	10.6729	19.0786	18.0863	20.5493	16.6086	17.407	19.2625	22.7974	21.0183	15.2687	14.5806	12.2152	9.91273	17.8703	15.2741
ENSG00000068028.17	RASSF1	165.932	4.94354	7.2753	1.47168	0.0190734	5.41931	3.35454	4.46644	7.67479	5.59989	4.3134	3.6515	7.80369	4.36103	3.74831	2.80041	3.16698	4.01523	5.73917	6.53832	3.80098	5.40194	6.5233	6.15806	13.1103	12.8117	5.54367	12.4511	7.29915	4.4047	6.56471	5.23483	3.97448
ENSG00000147124.12	ZNF41	161.601	5.15197	6.70168	1.3008	0.028146	5.23342	5.03592	1.97932	3.69676	8.45921	5.53451	3.47158	5.45146	5.89555	5.22849	4.29499	5.61229	7.40968	3.02738	5.44897	6.07562	4.33695	7.04259	4.98746	7.58025	8.29294	7.57661	7.26651	6.59543	6.65156	3.6143	10.3683	5.43327
ENSG00000168907.13	PLA2G4F	83.9639	4.13787	1.89969	0.459099	0.00998609	7.65965	4.45363	2.15177	5.54793	3.27999	3.6762	6.87624	0.71512	1.97909	3.56098	4.72664	1.08181	6.50313	7.58963	0.766156	1.12746	0.523917	1.50699	4.53251	0.919201	2.80797	2.74403	0.81805	3.74308	2.58996	0.384158	1.40723	0.291406
ENSG00000168079.16	SCARA5	30.759	0.624652	1.86071	2.97879	0.0192016	0.118432	0.195002	0.903901	0.204496	1.79762	0.157106	0.0365343	0.840064	0.304212	0.678024	0.199853	1.29018	0.465836	0.4413	0.237219	0.347748	0.35247	0.380897	1.65537	2.7557	0.793982	4.60368	1.8345	3.5003	0.422058	5.15424	0.0395201	1.04878
ENSG00000162825.16	NBPF20	19.8416	0.703827	0.92955	1.32071	0.0206164	0.682077	0.286186	0.516696	0.477462	0.734498	0.572232	0.290024	0.93587	0.710283	0.683597	0.619336	0.475025	0.486578	0.707512	0.88003	1.40214	0.617217	0.998024	1.47698	0.843814	0.790959	0.724638	0.856649	0.54484	0.558411	0.539998	0.775089	0.655392
ENSG00000173198.5	CYSLTR1	22.5363	0.652706	1.19583	1.83211	0.028189	0.47141	0.332654	0.545891	0.434124	0.435541	0.650365	0.508979	1.83432	0.542021	0.441627	0.303738	0.790076	0.507473	0.0936834	0.398677	0.830514	1.04586	1.36452	0.400051	0.215781	0.88491	2.11386	2.65532	2.15221	0.597324	0.789081	0.975305	0.221008
ENSG00000178199.13	ZC3H12D	45.6056	1.21054	2.32673	1.92207	0.00515648	1.06614	0.366992	0.841766	1.05515	0.849454	1.3867	0.276748	4.72716	0.706113	1.01503	0.179513	1.53625	0.662137	0.426334	1.56255	1.03958	2.02622	1.88172	0.856729	1.07125	4.8464	3.23686	4.06455	4.04892	2.03872	1.21874	1.74413	0.873692
ENSG00000121741.16	ZMYM2	441.665	17.6728	13.798	0.780748	0.0188106	21.3806	13.908	12.6886	13.9302	15.444	16.9459	12.1124	23.1297	18.305	12.205	23.2892	20.3786	23.7945	19.4787	16.6014	8.32837	7.74308	15.6644	13.5065	8.06238	13.2219	16.3574	22.187	13.9574	12.722	11.6748	20.2326	14.4158
ENSG00000103150.5	MLYCD	91.5947	2.80538	4.02415	1.43444	0.0384498	2.68673	1.73537	1.20178	3.37649	1.75877	3.4405	2.14055	5.05861	3.43874	3.35767	1.85476	1.85201	1.75608	2.57548	4.34717	3.85395	1.48168	3.73979	2.44173	4.69858	4.85167	5.71593	6.45313	3.19411	5.46945	1.66833	4.80449	2.6411
ENSG00000126882.12	FAM78A	68.8843	1.87601	3.34955	1.78546	0.00788385	1.75114	1.01103	1.86022	1.64928	2.15894	1.90062	0.707168	5.98154	1.98617	0.795394	0.76196	2.44128	1.14688	0.830463	1.6581	1.42389	4.2899	3.46451	1.69268	1.42094	5.08015	3.42089	7.46498	5.92148	1.96672	2.39824	2.00802	1.6917
ENSG00000187609.15	EXD3	54.1097	1.4966	2.65082	1.77122	0.0169529	1.74485	0.826245	0.897273	1.92266	0.965887	1.11468	0.403693	1.87045	1.4322	1.18294	1.15171	3.52075	1.14069	1.62541	1.14965	1.40011	0.978331	1.41524	2.97405	4.7553	6.86469	2.42665	2.6672	2.4494	3.32725	0.864667	1.90763	1.13017
ENSG00000100503.23	NIN	457.871	14.705	18.4689	1.25597	0.0156684	12.9491	12.0902	11.6079	12.9692	15.0223	17.2015	18.627	22.3585	16.5183	13.5854	11.0063	12.8028	12.3175	15.5719	14.4465	31.7983	20.5276	14.5132	16.1059	20.0016	17.2424	16.2574	22.1762	15.3762	13.5583	15.2176	22.724	13.2975
ENSG00000244623.1	OR2AE1	6.59746	0.409964	0.249846	0.609434	0.0168576	0.32695	0	0.516282	0.423407	0.323649	0.130115	0.226932	0.596348	0.179963	0.127622	0.526649	0.205486	0.507637	0.121828	0.436588	0.553855	0.199033	0.0876273	0	0	0	0.2856	0.172651	0	0.194193	0	0.327305	0.127735
ENSG00000087206.16	UIMC1	386.764	12.3215	15.7493	1.2782	0.0273966	12.2288	8.44683	10.0343	13.0775	12.9282	13.1737	10.7359	14.0838	11.1574	12.3445	10.0828	11.1919	16.9333	13.904	12.9994	15.6837	19.2818	14.1397	28.5768	11.4149	19.6165	11.8924	15.8416	14.1683	8.42631	11.2241	18.0487	15.1267
ENSG00000126790.11	L3HYPDH	132.026	3.99861	5.75742	1.43986	0.0113397	4.99662	2.36236	4.41845	3.10595	2.69567	5.72684	2.93633	3.82776	4.23545	3.19864	1.90865	8.41613	3.47558	2.90447	4.27019	4.85851	6.71208	7.47256	4.52711	3.88813	3.88577	4.34287	8.33782	4.14217	3.20518	11.2074	5.85239	5.11453
ENSG00000140090.17	SLC24A4	6.13709	0.233635	0.41789	1.78865	0.0213549	0.0971866	0.0342903	0.201424	0.0943941	0.0541156	0.212723	0.196747	0.369304	0.120362	0.161228	0.0838648	0.122162	0.0754482	0.0271602	0.15411	0.0699697	0.241582	0.110702	0.0909652	0.0834109	0.325776	0.259992	1.00076	0.630525	0.12988	0.457532	0.608076	0.123401
ENSG00000147113.16	CXorf36	59.2713	1.79365	2.70512	1.50817	0.0184309	1.09426	0.496398	2.60218	2.0694	2.2438	1.53454	1.21763	2.59784	1.89298	1.28141	1.57078	1.89946	1.13267	1.80572	1.96567	1.0769	2.50595	1.84346	1.81432	2.14664	3.07416	2.89036	6.35627	3.9065	2.47596	1.70082	2.24306	1.8322
ENSG00000244731.7	C4A	9.5423	0.332838	0.565365	1.69862	0.0260343	0	0.257714	0.134563	0.609586	0.265117	0.368198	0.14646	0.325665	0.196555	0.0570227	0.123258	0.306043	0.347785	0.127012	0.227583	0.552676	1.19561	0.352374	0.109386	0.780126	0.979366	0.616775	0.25714	0.351023	0.115689	0.224149	0.268111	0.247316
ENSG00000089693.10	MLF2	758.616	29.7034	24.2973	0.817995	0.0251394	24.6809	34.3098	23.1792	19.949	21.521	29.3007	26.205	37.0499	28.7505	32.282	24.4012	33.0026	34.769	40.8584	33.792	28.8823	22.6451	20.8498	32.558	20.8248	13.7835	21.9033	17.0189	21.3299	25.4131	28.9499	28.6016	31.8039
ENSG00000085265.10	FCN1	33.7092	0.821903	1.86005	2.2631	0.00382453	0.351499	0.0744115	1.08234	0.364159	0.904672	1.28694	0.862034	1.32499	0.993174	0.27441	1.21327	0.309281	0.327452	0.497706	0.962206	0.916979	1.62623	0.998593	0.579036	1.00559	3.06344	3.85341	1.74478	4.96631	0.793341	1.73568	1.02045	0.576768
ENSG00000132840.9	BHMT2	32.8937	0.970921	1.62537	1.67405	0.00846257	0.605248	0.349444	0.847131	0.332525	1.17104	0.875884	0.611049	2.6428	0.807627	0.558418	1.24082	1.38325	0.444238	0.533064	0.661261	0.894801	1.00486	1.09127	1.11241	1.76301	1.40174	2.88383	3.60289	1.38823	1.24187	1.19731	1.81771	0.429931
ENSG00000164604.12	GPR85	7.38567	0.31162	0.423952	1.36048	0.0198845	0.165707	0.133637	0.177559	0.286126	0.175751	0.301467	0.087631	0.244675	0.15636	0.129365	0.39221	0.416584	0.176424	0.141133	0.189664	0.352891	0.144108	0.241094	0.159531	0.650145	0.317407	0.392893	0.475025	0.204776	0.224966	0.217936	0.497662	0.332946
ENSG00000170989.9	S1PR1	60.6017	1.73083	2.87994	1.6639	0.00862348	0.938596	0.733292	2.48785	0.839276	1.95779	1.17395	1.56663	3.587	2.23873	1.25614	1.35761	2.19106	0.999296	1.52386	1.61144	1.52184	2.9113	2.28198	1.30522	1.64947	1.97763	3.66023	7.1868	5.147	2.07065	1.85164	2.34904	2.22637
ENSG00000135077.8	HAVCR2	65.8804	1.83255	3.16862	1.72907	0.0292135	1.15064	1.78631	2.30754	2.861	1.84522	1.50197	1.17135	3.41395	2.61784	1.04201	1.12266	1.96703	1.51498	0.548802	1.137	1.48139	7.5463	2.51645	1.0339	0.842705	1.78966	2.49269	6.36781	4.11411	2.29632	3.7365	2.25771	3.4165
ENSG00000161640.15	SIGLEC11	23.8797	0.166749	1.85988	11.1537	0.0492521	0	0.116812	0	0	0.0273108	0	0.0255326	0.335481	0.0404959	0.0861541	0.0507893	0.0693588	0.171346	0.0411212	0.0368409	0.0560837	0.156755	0.0295773	0.206585	21.0266	0.29594	0.1928	0.349656	0.278434	0.196641	0.046181	0	0.043115
ENSG00000129675.15	ARHGEF6	118.32	3.21188	5.61091	1.74692	0.0136871	1.33339	2.4771	3.46983	2.67825	3.20553	3.46542	1.62433	10.3569	4.23386	1.78449	1.6907	3.69415	2.60263	1.31816	2.74345	2.63676	7.12315	6.59305	1.81346	1.77496	5.87432	8.33153	12.6741	7.80722	4.23461	4.14499	5.72071	2.91298
ENSG00000138356.13	AOX1	32.3886	0.735926	1.85767	2.52426	0.00519482	0.378146	0.800526	0.286122	0.462502	0.904628	0.451468	0.379119	0.785525	0.566611	0.393617	0.435083	1.78247	0.273993	0.587102	1.05198	1.85769	1.31725	0.35472	2.07644	5.33698	0.676038	2.78021	2.6292	2.47605	1.90911	0.316484	0.725567	0.393964
ENSG00000104728.15	ARHGEF10	27.9909	0.854527	1.38254	1.6179	0.0493616	1.10318	1.14481	0.749325	0.364165	1.7264	0.309903	0.210194	0.46359	0.809633	0.544606	0.970631	1.32551	0.171285	0.991397	0.43327	0.709044	1.69868	1.3653	2.69681	2.02358	0.282784	1.06995	1.8162	0.689992	0.250533	1.6565	1.12062	1.293
ENSG00000196329.11	GIMAP5	34.8146	0.903207	1.85127	2.04966	0.00749163	0.435454	0.122913	0.71054	1.12785	0.876486	1.31705	0.308961	2.45337	0.830915	0.52126	0.160326	1.1677	0.576944	0.411055	1.02728	0.649142	2.62729	1.54055	0.652126	0.697631	1.9073	2.38373	5.36547	2.57401	1.65529	0.680302	1.30778	0.725871
ENSG00000171115.3	GIMAP8	112.917	3.01915	5.41768	1.79444	0.0136328	1.88305	1.80125	3.68383	3.39596	2.58894	2.53127	2.16866	7.93782	3.51637	3.29948	1.54067	3.41896	2.261	1.49687	2.26305	2.86382	11.2254	5.24872	2.56934	2.92102	5.10579	6.36027	12.4186	9.26064	3.33047	3.18701	2.51346	2.1253
ENSG00000180535.3	BHLHA15	75.9368	2.02944	3.71502	1.83057	0.0274377	3.07161	0.774109	0.433065	3.9778	2.93201	6.11198	1.01522	3.46824	2.01274	0.513848	1.00974	0	1.22634	0.490517	1.90433	5.94665	1.69178	3.76336	1.80713	4.26817	5.58938	7.09115	5.32947	4.42843	2.34565	3.12161	1.09819	0.514301
ENSG00000136213.9	CHST12	61.2238	1.93036	2.69757	1.39745	0.021409	1.40994	1.09443	1.24593	2.66862	1.2615	2.10631	1.86691	3.05306	1.37703	1.60874	2.32103	2.1131	1.20571	1.4872	2.63583	1.65354	1.72102	2.54054	2.01403	3.40065	4.95888	2.7522	3.49361	2.61912	1.70064	1.47957	3.75668	1.67795
ENSG00000164088.17	PPM1M	100.834	2.96336	4.55255	1.53628	0.0278484	2.69658	2.8024	1.52906	3.68261	2.57229	2.96579	1.74689	6.17048	2.37485	1.9138	2.75285	3.38957	3.04497	1.93652	3.37169	2.04315	4.53668	3.41651	3.01039	4.26402	9.79512	4.79674	6.93864	5.54886	6.40657	2.95445	2.60134	1.5707
ENSG00000100983.10	GSS	206.406	8.19614	6.63568	0.80961	0.0243479	9.78348	9.90544	6.45945	8.59344	6.35822	9.68295	7.32205	5.98275	9.07405	7.23931	9.25321	4.91908	11.8704	8.03069	6.96758	5.28423	7.10087	5.15302	8.93953	8.37238	6.80612	5.84606	4.28281	5.96912	4.68243	7.87961	5.96162	8.68597
ENSG00000099330.8	OCEL1	70.6976	2.2237	3.08785	1.38861	0.023029	2.71953	1.98524	1.70294	2.42887	2.18151	1.79136	1.43197	2.9078	1.85824	1.90347	2.11478	2.0039	1.2813	1.5375	4.00716	1.42973	2.16932	2.06096	3.58117	5.58027	4.52659	2.82613	3.07027	3.51523	3.89894	2.11911	2.15921	1.90514
ENSG00000100448.3	CTSG	31.7087	0.715899	1.82848	2.5541	0.0223052	0.127425	0.449592	0.855162	0.330036	0.882969	1.01422	0.471702	1.1621	2.57174	0.0994785	0	0.160171	0.158276	0.189924	0.765696	1.16563	1.39627	3.68838	0.381656	0.291635	0.512563	2.22618	1.61493	6.70549	2.87601	0.746525	0.765379	0.0995662
ENSG00000080854.14	IGSF9B	32.8214	0.811178	1.80413	2.22409	0.0323353	1.09559	0.83754	0.192226	0.236469	0.180755	2.27693	0.605535	2.09085	0.480203	0.760277	0.154067	0.114762	0.51032	0.725757	0.406384	0.783618	0.160562	0.717773	7.45166	1.04478	2.65236	0.704481	1.28566	1.29435	0.469972	3.464	1.55377	0.57071
ENSG00000157259.7	GATAD1	287.401	9.07101	11.8566	1.30709	0.0412058	12.6543	8.19626	4.28363	9.76395	5.70352	7.1039	10.9755	9.51492	7.48125	10.7381	10.6349	7.95315	10.7825	6.90201	11.8774	11.5156	6.87227	14.4345	7.18664	15.3203	12.582	16.5808	13.7197	8.24068	17.6464	6.70242	11.3829	10.652
ENSG00000274897.2	PANO1	8.98453	0.317432	0.540235	1.7019	0.0895755	0.104215	0.367702	0.205706	0.44987	0.361071	0.165897	0.0964463	0.126724	0.305937	0.0813592	0.143888	0.130997	0.194171	0.388326	0.139162	0.353082	0.338356	0.22345	1.17053	0.357773	0.838407	0.0455175	0.660391	0.601001	0.123798	0.697773	0.312985	0
ENSG00000184347.14	SLIT3	81.4334	2.26153	3.87004	1.71125	0.0106519	1.55928	2.07068	1.68189	1.3038	2.23024	2.48217	0.891959	6.30776	2.03193	0.968095	1.10186	2.0063	1.12854	4.66645	1.99199	4.19717	3.05944	3.69209	4.3669	3.653	2.27181	7.63622	7.85801	4.99176	1.98355	2.3326	1.72076	1.24716
ENSG00000181896.11	ZNF101	97.2445	3.09977	4.11907	1.32883	0.0306486	2.90913	3.05103	2.32849	2.99548	3.10433	3.16519	2.12417	5.53336	2.92832	3.62545	2.41978	2.54966	2.00565	2.58568	3.67083	3.16482	3.21696	4.27756	4.25672	4.64233	5.72571	4.21981	6.84955	5.17539	3.17044	2.4571	3.33978	1.75176
ENSG00000163534.14	FCRL1	30.3124	0.646582	1.80105	2.7855	0.0425895	0.533921	0.125589	0.421554	0.69144	0.528531	1.027	0.0205883	2.84042	0.424502	0	0.0614312	0.447422	0.442128	0.0994746	0.534723	1.3567	0.577828	1.71718	0.233213	0.254578	6.20443	1.69068	3.61831	5.29217	0.369978	0.148953	0.26725	0.382425
ENSG00000106948.16	AKNA	266.623	7.12364	12.5053	1.75546	0.0150531	5.38408	6.32832	6.83935	9.04001	6.35153	8.2421	3.34728	21.6391	5.87863	5.9052	2.66032	7.5566	4.84137	4.07396	7.26674	6.51316	11.7497	12.1549	6.22043	11.3775	26.7949	16.4971	22.2743	22.3466	8.75006	6.80067	5.73713	4.05211
ENSG00000188176.11	SMTNL2	7.49994	0.277163	0.472499	1.70477	0.030097	0.4253	0.150058	0.0559654	0.183591	0.0350839	0.225673	0.0655991	0.215482	0.156065	0.166012	0.0652448	0.178199	0.176091	0.369774	0.189306	0.120077	0.172603	0.151982	0.318459	0.405573	1.04546	0.464389	0.67376	0.766458	0.336811	0.11865	0.212881	0.0553862
ENSG00000169554.19	ZEB2	196.795	5.23539	9.31264	1.77879	0.0128636	2.62713	2.76107	6.0048	3.70984	6.75399	6.68459	3.89911	9.87676	7.23795	3.57282	3.85876	6.46403	3.31528	5.61838	4.64637	3.85147	12.8028	11.2021	4.59354	3.82188	5.73348	10.9373	27.1483	12.3299	4.53178	8.57276	7.31639	6.92264
ENSG00000169962.4	TAS1R3	19.1978	0.550675	1.05675	1.919	0.0396624	0.713995	0.611801	0.181199	0.264183	0.201939	0.852437	0.117994	0.651154	0.393004	0.318517	0.586785	0.192318	0.475106	0.0760137	1.12368	0.794821	0.310464	0.30071	0.496442	2.21771	1.77792	0.935542	1.77746	0.698512	2.18098	0.554885	0.153165	0.239098
ENSG00000167553.15	TUBA1C	1271.79	53.4409	36.3827	0.680802	0.0329722	46.7288	36.1226	96.9373	84.8643	59.4493	52.2086	62.1738	17.6762	75.3453	60.0333	70.5378	32.0775	32.3085	39.4729	34.1778	50.3132	66.866	31.391	34.2539	38.591	15.7652	30.5481	18.1276	53.3075	33.1889	41.0075	24.6387	33.6766
ENSG00000004534.14	RBM6	1004.67	29.4596	43.5055	1.47678	0.0213921	30.5949	18.4933	15.9778	48.1084	24.4472	29.6951	24.6307	46.7077	29.9501	29.6503	23.1955	32.5803	30.5271	23.6582	32.1777	24.8904	29.6207	36.5525	46.7339	88.2409	74.0077	41.6278	70.6262	35.744	30.1347	29.7399	34.7327	21.6203
ENSG00000135709.12	KIAA0513	133.961	3.79736	6.13848	1.61651	0.0495319	4.16059	2.12507	3.12854	6.19199	4.40297	2.90155	3.85043	4.5292	3.34429	5.66099	3.97552	2.39077	1.68573	2.37715	4.73564	7.56492	2.00211	3.2922	5.02915	6.28016	14.4247	7.6755	6.86323	5.85563	10.5673	4.32782	1.92388	2.69366
ENSG00000158481.12	CD1C	31.9411	0.767587	1.78672	2.32771	0.00604606	0.244016	0.344384	0.481653	0.526677	0.603882	0.388441	0.169369	3.56064	0.671569	0.571499	0.280757	0.153363	0.378871	0.0909251	1.54776	1.11608	1.2874	1.1118	0.913582	0.279238	5.72571	2.77102	3.99456	2.02288	0.869606	0.408452	0.854984	0.572003
ENSG00000108479.11	GALK1	50.0534	1.61084	2.20698	1.37008	0.0118484	1.69571	1.453	1.26711	3.03254	2.60781	1.15686	1.54127	0.994154	1.33338	1.56021	0.891897	1.14187	1.42925	1.26371	1.29391	1.9287	1.30263	1.62312	3.49174	3.0493	3.49167	2.01027	1.98277	1.96453	1.36687	1.72331	1.51567	1.94015
ENSG00000178467.17	P4HTM	71.5253	1.97574	3.43764	1.73993	0.0285437	2.93292	1.34203	0.606054	2.49257	1.2702	1.24015	0.827007	3.52459	0.975347	3.13043	0.643269	1.32489	2.20574	1.38315	4.2377	2.03393	1.26468	1.55985	4.04913	7.23694	6.78977	2.53197	3.84775	2.04817	4.70889	0.786261	4.47297	2.05895
ENSG00000119682.16	AREL1	276.148	8.88685	11.2035	1.26068	0.0304213	8.93616	7.2526	9.0889	6.34989	7.41115	9.40081	7.68245	9.64268	10.1188	11.6334	6.89119	11.9253	11.8139	4.40996	9.24549	7.84086	11.0841	9.88829	7.39091	12.5563	8.22346	10.2336	13.0813	17.4256	7.79785	14.2963	10.9365	13.5905
ENSG00000283761.1	AC118553.2	17.0872	0.611325	0.824411	1.34856	0.0227991	0.577026	0.450044	0.27575	0.471954	0.691453	0.700996	0.815067	0.590866	0.245174	0.450475	0.377378	0.267221	0.697871	0.430021	0.628584	0.802566	0.542309	0.586047	0.545772	0.347533	0.570088	0.676486	1.31506	0.569204	0.541147	0.94045	0.699263	1.28142
ENSG00000011376.10	LARS2	123.2	4.10716	4.95325	1.206	0.0261047	3.46113	2.31573	3.22864	4.91386	5.08852	3.95878	3.5946	5.82979	4.04541	3.78286	3.3628	3.80274	3.47114	4.68107	4.57041	3.71768	3.68332	4.7962	6.77668	5.83837	5.87831	3.42651	4.4948	4.50949	4.08104	5.72911	5.31282	4.84794
ENSG00000015285.10	WAS	128.458	3.54109	6.01087	1.69746	0.0159438	2.64718	2.43879	2.00298	4.69785	3.93069	3.57016	2.85815	8.80734	3.53479	2.69808	2.03051	4.89878	2.42041	1.64398	3.43668	3.41308	7.01296	3.508	2.91821	5.0488	12.7187	6.77659	9.94054	12.1386	3.84341	4.12334	2.87089	2.52809
ENSG00000176401.5	EID2B	27.285	0.843498	1.34096	1.58976	0.0286784	0.37551	0	0.555903	1.13469	0.650509	0.597762	0.521275	1.88353	0.826768	0.659599	0.08641	1.18003	0.466427	1.39922	0.814827	0.731534	1.21917	0.754817	0.773238	0.322284	0.881114	1.10706	2.18124	1.21811	1.44973	1.09997	1.97357	2.42066
ENSG00000166377.20	ATP9B	142.064	4.50775	5.94211	1.3182	0.0209273	3.20057	4.43429	2.48996	4.63571	3.66729	4.22707	3.08675	5.34593	8.12226	3.81659	3.24813	4.06729	6.69861	4.24616	4.82959	4.95706	4.0585	5.37931	5.33736	8.65325	7.51389	5.62742	7.36716	4.9524	8.53704	3.55194	3.46224	6.54981
ENSG00000096996.15	IL12RB1	32.7113	0.827819	1.77646	2.14596	0.00760166	0.611034	0.201218	0.916632	0.914394	0.806488	0.778147	0.376989	2.40239	0.822143	0.445223	0.112486	0.819267	0.860172	0.333935	0.516759	0.966089	5.37292	0.938925	0.488037	1.07215	3.55026	1.65464	2.79645	1.76189	0.677461	0.954608	1.0195	0.541105
ENSG00000123360.11	PDE1B	15.6322	0.512188	0.826875	1.6144	0.0147545	0.252809	0.0810894	0.626029	0.555576	0.36401	0.658534	0.255232	1.21567	0.421677	0.16148	0.349048	0.288889	0.485301	0.0685101	0.398964	0.22581	0.848777	0.468136	0.464646	0.447099	1.10937	0.813077	1.55345	1.45793	0.546024	0.403935	0.644212	0.466908
ENSG00000149633.11	KIAA1755	33.4089	0.880148	1.76975	2.01074	0.00505755	0.238265	0.0917094	0.829441	0.822824	0.782627	0.275845	0.300686	4.16153	1.61352	0.08455	0.458562	0.762355	0.201786	0.774827	0.303702	0.57241	1.55594	1.70677	0.810955	1.36328	1.74258	0.794684	5.65046	1.37406	0.437421	3.13622	1.64798	0.913945
ENSG00000177575.12	CD163	203.539	5.27204	9.78914	1.8568	0.0159913	2.25892	2.06161	6.65846	9.64718	7.76679	4.387	5.78379	8.22213	7.85815	2.37485	3.70104	7.53398	3.68501	2.42415	3.21751	4.20419	22.3566	8.97643	5.66073	5.37675	6.1788	8.37967	25.1933	13.1356	3.43474	11.0914	4.25139	7.7192
ENSG00000144747.16	TMF1	432.487	14.2883	16.9971	1.18958	0.0309962	11.951	15.6953	11.8646	15.5723	16.3324	15.3604	16.3955	18.0979	15.2029	14.2713	8.60673	13.2696	9.16785	13.2605	17.776	14.104	15.8618	20.5469	13.2077	13.9292	14.5404	20.1541	21.9713	18.5861	20.8217	12.8547	17.9016	15.1831
ENSG00000119688.20	ABCD4	162.325	4.92294	7.02158	1.4263	0.0141659	4.01316	3.22642	3.59419	4.861	3.71571	5.03763	3.1689	9.21361	4.5498	3.9903	4.135	7.30323	6.84482	3.31811	5.37225	4.13311	4.15681	6.04682	5.78576	12.772	11.4044	5.83397	11.2181	6.73581	4.8147	6.0324	5.3367	5.70992
ENSG00000122484.8	RPAP2	165.864	5.29454	6.86507	1.29663	0.0248772	5.2498	4.28835	4.62475	3.28026	4.666	6.85304	4.60323	6.30914	4.55372	4.05856	4.72878	4.92994	8.76002	5.36616	5.64637	8.27377	5.24351	5.13535	5.71292	5.0024	5.72437	8.15014	10.6143	4.26296	8.48084	4.34246	6.89144	10.1115
ENSG00000136490.8	LIMD2	104.472	2.86987	4.94031	1.72144	0.0209138	2.25079	3.38487	1.79166	2.58033	2.61158	2.67253	0.751245	8.23319	2.78922	1.4979	2.19062	2.87559	3.50613	2.39232	2.02013	1.72516	3.86346	3.32278	2.12742	5.57357	11.0327	4.8992	8.45635	8.59133	3.50652	4.10723	4.24789	1.47039
ENSG00000214274.9	ANG	15.1602	0.460394	0.850333	1.84697	0.0801759	0.367304	0.0863971	0.338336	0.105704	0.363596	0.584699	0.283269	0.223318	0.898556	0.191166	0.450782	0.769495	0.152078	0.182486	0.408728	0.331848	0.298132	1.31257	0.366711	0.140107	0	1.44383	0.905152	0.79433	0.581764	0.922231	2.08365	0.574003
ENSG00000106565.17	TMEM176B	257.269	6.86338	12.0861	1.76095	0.0141458	3.18491	5.68108	5.62298	6.11042	5.73627	10.7032	4.46216	16.567	12.2715	3.93682	3.54231	12.7886	4.45053	2.9669	3.42597	6.1446	27.79	11.4288	5.63083	5.87189	8.77807	17.3882	21.5837	17.9845	4.93941	14.4385	6.9967	6.84366
ENSG00000175779.2	C15orf53	10.0464	0.361613	0.570939	1.57887	0.0352506	0.124039	0.058353	0.13874	0.19633	0.214878	0.181	0.296548	0.729011	0.212411	0.4519	0.266403	0.337818	0.282464	0.061626	0.372677	0.315185	0.495009	0.398932	0.139319	0.0946289	0.415788	0.902933	0.960683	0.312955	0.4666	0.605577	0.869219	0.145381
ENSG00000113621.14	TXNDC15	226.229	7.37962	9.10265	1.23348	0.024259	6.61752	6.00727	5.71054	5.51226	5.92527	10.3225	4.75472	8.65334	8.35879	5.55561	9.15199	6.77156	8.19908	7.70722	9.94673	9.57648	8.82617	9.6077	8.24193	6.77357	7.71367	13.2169	12.3273	8.82153	6.59692	9.1287	10.2533	5.95026
ENSG00000122420.9	PTGFR	20.7258	0.631658	1.08084	1.71112	0.0497995	0.48283	0.366922	0.48385	0.320654	0.62502	0.768601	0.653069	0.474207	0.531528	0.318947	0.256398	1.49394	0.230666	0.249109	0.719133	0.553667	0.557706	0.81625	0.278106	0.25501	0.199197	1.18419	2.19663	1.52609	0.617677	1.83398	1.07825	1.65418
ENSG00000175764.14	TTLL11	63.3866	1.92996	2.8644	1.48418	0.0174888	0.495281	1.29315	2.56135	3.76288	1.44633	1.26147	0.893799	2.28856	2.72617	1.93329	1.20809	1.92994	1.29191	1.51332	2.84387	2.34922	5.7085	1.83184	2.33642	3.34394	4.51578	3.20155	3.08619	2.46351	2.00038	2.11404	1.43787	1.54799
ENSG00000139547.7	RDH16	30.9645	1.41996	0.958855	0.67527	0.0142216	1.92064	2.17564	1.3169	1.83273	0.50033	0.643664	1.00567	1.29065	0.816067	1.61779	1.0235	1.39771	1.34978	1.356	1.55232	0.393854	0.369222	1.16498	0.983999	0.231355	1.69424	0.794717	1.38789	0.255044	0.240162	0.803728	0.910765	1.93516
ENSG00000144136.10	SLC20A1	460.873	13.8274	19.7125	1.42561	0.038808	20.3116	14.5989	10.8193	12.5489	10.4417	15.3171	8.80312	22.1982	11.543	10.6367	12.0786	17.876	9.96307	17.4766	11.2977	8.58338	24.3092	20.3785	26.657	14.5136	12.6701	9.48841	25.8615	17.2671	13.9474	29.4273	14.2053	37.6536
ENSG00000189129.13	PLAC9	32.5361	0.856456	1.72994	2.01989	0.0202551	0.84717	0.199271	0.557397	0.975203	0.279539	0.786671	1.04535	1.63106	1.24349	0.551143	1.29963	0.887401	0.350761	0.315672	0.377085	1.2916	1.08874	1.13527	2.5374	3.2315	1.32522	2.89844	2.68417	1.52674	2.18044	0.472685	0.706741	0.110326
ENSG00000100483.13	VCPKMT	216.297	6.75881	9.05502	1.33974	0.0269298	6.21945	5.89182	6.6931	5.22244	4.51207	7.25586	6.89908	7.71814	6.34652	6.8508	4.82287	5.67591	11.1646	4.82545	9.78402	16.1645	4.59868	8.17467	9.31409	6.53219	8.45343	6.80969	13.0471	5.28179	7.0845	8.98446	10.3201	11.65
ENSG00000139910.19	NOVA1	11.539	0.353873	0.694688	1.9631	0.0355462	0.505412	0.713296	0.103201	0.0601857	0.172521	0.166458	0.0725795	0.222518	0.0959289	0.122452	0.0882292	0.438136	0.151533	0.779281	0.116361	0.661318	0.0707294	1.7376	1.27889	0.498589	0.490726	0.578507	1.01235	0.414586	0.207028	0.656376	0.0697877	0.054471
ENSG00000251322.7	SHANK3	314.632	8.75746	14.3131	1.63438	0.0583515	10.2865	5.20376	9.31762	12.8549	8.43904	9.5706	5.03151	11.0518	6.85988	9.77227	4.82059	8.53143	10.4433	10.7637	6.91499	7.88518	5.9665	7.32663	22.4741	27.1437	30.4818	10.0934	23.0424	16.4048	9.42957	6.42737	13.213	4.88127
ENSG00000140287.10	HDC	32.0802	0.839172	1.71481	2.04346	0.0215079	0.929403	0.124922	1.39772	0.420304	0.657157	0.880645	0.450538	1.72211	1.41291	0.898324	0.183315	0.778832	0.192404	0.329822	0.709179	0.61477	1.68836	2.01647	0.596507	0.455808	3.97587	1.64305	3.45887	2.55228	1.73492	0.851932	1.19624	0.207488
ENSG00000239920.2	AC104389.4	7.4892	0.314584	0.428495	1.3621	0.040381	0.0665078	0.0234659	0.210043	0.258387	0.3621	0.317614	0.153874	0.262835	0.122026	0.0778823	0.168348	0.208999	0.351094	0.346949	0.288633	0.315461	0.256418	0.338676	0.174301	0.228323	0.312114	0.450247	0.561928	0.479431	0.355523	0.0834942	0.53264	0.181886
ENSG00000139899.10	CBLN3	59.1253	1.5877	2.93153	1.8464	0.0204975	1.02507	0.723348	1.61867	1.23899	1.15002	2.44766	0.664057	3.03307	0.877688	1.60051	0.629019	2.2334	1.57035	1.22227	2.28135	1.27341	1.74725	0.842515	1.63746	3.75369	8.52152	3.0146	4.47478	3.59615	1.70476	3.48886	1.84713	0.907755
ENSG00000179144.4	GIMAP7	377.554	9.55726	18.2304	1.90749	0.0117247	3.6243	6.3938	10.2905	9.50745	10.0042	11.206	5.09568	34.9177	13.2483	7.72653	3.07939	7.184	6.75271	3.42815	9.4001	11.9958	33.9434	21.2953	9.81155	6.6997	15.887	28.0063	41.6635	29.8443	12.7504	7.46661	10.8847	5.44602
ENSG00000155275.18	TRMT44	112.478	3.25868	5.10751	1.56735	0.0163557	2.90141	2.27134	1.50333	3.40513	2.09799	2.43561	2.30752	4.32739	2.5203	4.10546	3.90159	3.10568	5.22281	3.00686	4.26784	5.65224	2.80576	2.2478	13.2049	5.9141	6.83838	3.29678	4.40489	4.80396	2.69266	4.72379	5.53681	2.97554
ENSG00000158882.14	TOMM40L	105.144	3.40301	4.37681	1.28616	0.047757	2.92779	1.31474	2.90002	3.30899	2.00241	3.34719	4.85252	3.85142	4.37558	3.49085	4.75281	3.21181	2.74402	2.69762	3.76741	4.83344	2.07396	2.59661	5.6601	2.80214	4.99629	4.95226	3.76678	4.7583	3.60441	4.9453	4.3698	6.23916
ENSG00000090554.12	FLT3LG	24.8038	0.734315	1.27608	1.73778	0.00719164	0.676704	0.477522	0.510001	0.956014	0.334936	0.63654	0.341595	1.79533	0.586935	0.672371	0.424687	0.463968	0.573098	0.366768	0.698256	0.625276	0.848862	0.69249	1.15161	1.40796	2.55705	1.10163	3.18362	1.10866	0.584626	0.669332	0.492682	0.865239
ENSG00000173540.12	GMPPB	91.163	2.79199	4.00639	1.43496	0.0257247	2.23332	1.26443	2.02984	4.0132	2.75061	3.45179	2.18699	4.43666	2.06787	3.04101	3.34643	2.12176	1.45153	1.85788	4.12657	3.95042	2.84556	2.64481	3.30567	5.67598	8.18262	3.99247	5.10133	3.9312	3.70182	3.78176	1.7418	1.92767
ENSG00000139324.11	TMTC3	590.896	24.6936	17.1763	0.695579	0.0207706	22.844	32.1052	17.6118	13.162	19.9996	31.819	24.8673	14.4265	42.3343	38.6527	18.2225	30.7571	16.087	29.4541	16.5604	23.2592	12.5779	22.0309	9.57254	10.0628	5.41469	20.2054	15.7982	9.9218	28.6978	13.8793	28.8013	21.7706
ENSG00000247596.8	TWF2	155.063	4.83724	6.56184	1.35652	0.0422287	3.83951	5.55424	5.00191	7.54125	5.60611	3.74359	4.17511	5.60253	4.71988	3.522	7.42159	3.37835	2.9807	3.93436	4.03754	4.84559	11.0244	4.6307	8.48119	9.33663	7.97958	4.61164	6.08255	8.3033	5.70122	6.58753	2.59448	3.82511
ENSG00000204516.9	MICB	79.1681	2.20187	3.76461	1.70973	0.0108597	0.250296	4.15064	2.69256	4.59196	1.05302	1.69336	1.12923	5.36426	1.44659	0.928158	1.6415	2.98887	1.127	1.25908	1.21158	4.40962	9.06596	2.78394	2.81127	2.21978	3.43993	2.62368	4.89039	2.21026	5.05457	4.45148	2.50567	1.17344
ENSG00000093072.16	ADA2	81.8835	2.14773	4.03596	1.87918	0.0294296	1.54886	1.30588	1.8661	1.5977	1.63279	2.28947	1.2007	5.90699	3.24777	1.25628	0.897978	2.30088	1.97384	0.749526	2.94121	2.78052	7.3716	5.19705	0.813344	1.01281	2.96679	10.5075	6.52197	4.52408	2.50896	2.89563	2.27547	1.79178
ENSG00000147852.15	VLDLR	96.1308	4.31145	2.63531	0.611235	0.0380568	4.25565	5.45045	5.43228	3.60937	4.9179	4.41681	4.216	2.23405	8.55798	4.12729	4.76268	0.777652	1.54855	1.59272	7.27238	1.83562	4.48134	2.96449	3.39715	2.55295	3.29294	1.89147	1.48498	6.39227	1.9375	0.972802	1.25744	0.498055
ENSG00000103047.7	TANGO6	184.636	5.69191	7.85055	1.37925	0.035774	6.98893	5.85312	3.94147	7.44842	6.39887	7.05018	3.81442	5.65005	5.68348	6.61533	2.10898	6.46808	3.46607	5.24658	7.14471	4.78775	4.52988	7.57488	13.9936	11.7476	12.5976	6.0044	7.3542	5.25953	4.68329	6.19211	7.79099	8.24144
ENSG00000023902.13	PLEKHO1	189.311	5.56048	8.36184	1.5038	0.030075	5.44047	4.06494	5.49569	5.84825	6.46794	7.57793	2.75191	11.9663	6.99717	4.68451	2.11109	3.68748	4.04136	5.98229	4.78981	3.47866	12.7606	7.3478	4.29342	6.53093	12.6942	6.44137	15.5476	12.3038	4.08675	9.50842	6.03373	6.37654
ENSG00000154217.14	PITPNC1	123.362	3.87014	5.23924	1.35376	0.0408986	3.49313	4.32947	3.38559	2.99645	5.26437	3.31496	2.53852	4.87383	2.37464	3.98565	2.85457	3.71531	5.36796	2.43634	5.62131	3.14076	2.83528	5.62925	4.66115	8.22526	5.79454	7.24694	7.94598	6.44045	3.11213	3.97299	5.11088	2.69444
ENSG00000011590.13	ZBTB32	20.8384	0.643576	1.07575	1.67152	0.0212328	0.505651	0.178408	0.698658	0.818537	0.437978	0.955852	0.175484	1.69087	0.463876	0.740163	0.116357	0.317799	0.274784	0.188415	0.590812	0.513945	1.7443	0.847011	0.331297	0.723296	1.86447	0.96622	1.80237	1.32133	0.600666	1.21669	0.5062	0.246939
ENSG00000217555.12	CKLF	168.824	4.93726	7.50502	1.52008	0.0334191	3.01605	4.15019	3.81008	4.42663	7.16545	3.96094	3.41923	9.35203	5.53374	5.53327	2.98434	4.35981	3.18434	3.70866	7.95419	4.64937	8.75179	10.266	4.40384	2.41597	3.8418	7.31103	15.7675	6.84861	5.19504	5.55333	9.3599	11.9011
ENSG00000105220.15	GPI	654.128	26.9012	19.4931	0.724618	0.0441886	45.3442	30.0656	20.4181	24.5558	19.4654	37.8133	36.3581	10.4156	29.9999	34.7852	21.6382	13.8268	18.1736	37.7383	21.42	22.0109	13.865	25.0088	24.6977	21.7049	16.1558	13.1101	14.4742	16.7335	12.4827	18.4675	31.969	21.4301
ENSG00000185862.6	EVI2B	278.195	7.3551	13.1283	1.78493	0.0985416	4.81644	8.88447	5.8376	4.23121	7.1099	10.3573	6.92067	19.2141	9.39516	4.88155	3.92775	8.81577	4.933	2.39293	7.10856	9.96265	20.1642	20.1105	1.96142	2.41739	6.6846	25.539	27.0403	20.3447	11.8445	6.78914	9.64333	6.86661
ENSG00000107263.18	RAPGEF1	752.602	23.1296	31.4198	1.35842	0.0267228	28.3801	22.938	22.3086	42.8082	21.8932	24.3201	11.0149	27.2277	21.1678	21.8631	12.5319	35.7992	14.3801	20.8145	17.9969	22.0854	35.9942	26.9403	36.2666	53.3931	43.1154	36.9351	32.6932	34.77	28.9011	18.9182	16.571	20.5733
ENSG00000167261.13	DPEP2	31.2937	0.802117	1.69707	2.11574	0.000849518	0.50052	0.176598	0.553254	0.648184	0.644107	0.916273	1.1117	1.49113	0.863235	0.507972	0.345529	0.629147	0.652788	0.522209	0.969123	0.983543	1.13753	1.47561	0.862	1.71829	2.21466	1.72701	3.59458	2.74213	2.081	0.921587	0.952019	0.351983
ENSG00000145703.15	IQGAP2	115.74	3.25153	5.36669	1.65051	0.0151522	1.83854	1.70379	3.13056	2.96423	4.46223	4.56636	2.24472	8.48461	4.812	2.31726	1.35587	2.47808	1.99478	1.79935	3.12059	3.42969	7.68621	6.05553	3.83146	2.256	6.20744	8.25258	12.1885	6.43506	2.89447	3.0404	3.99151	2.19814
ENSG00000138135.6	CH25H	31.7614	0.837613	1.69209	2.02014	0.0100102	1.03844	1.0259	0.901886	0.268962	0.873767	0.743878	0.288309	1.32587	0.724014	0.243209	0.430128	1.30531	0.451454	0.541722	0.901336	2.00541	1.7279	1.50292	0.31103	0.594167	1.39237	2.041	2.41282	3.8926	0.740145	2.78116	0.7277	0.567988
ENSG00000154252.11	GAL3ST2	33.7798	0.733715	1.96724	2.6812	0.167469	0.766781	1.8938	0.100901	0.441333	0.316267	0	0.295675	0.388497	0.609641	0.798152	0.999864	0.321278	0.396846	1.23811	0.938584	5.06583	0.259324	0.137006	2.6794	4.24105	1.71353	2.34432	0.404911	0.460621	5.617	0	1.15142	0.199714
ENSG00000180773.14	SLC36A4	65.7155	2.11379	2.83143	1.3395	0.0327683	1.78968	1.7349	2.79752	1.35783	1.22582	2.3885	2.3422	2.01136	2.58712	1.59476	1.79708	3.77207	1.15641	2.03429	1.61736	1.72104	2.9493	2.67447	2.9103	1.69633	2.88443	2.67663	3.41753	1.64197	1.30995	4.53895	3.78232	3.30533
ENSG00000174938.14	SEZ6L2	92.0737	4.33022	2.30157	0.531515	0.058177	1.10757	7.5752	1.07628	10.0035	1.37049	4.17042	3.48896	6.03465	3.7829	2.72702	6.64616	7.97841	1.29636	5.14291	1.05235	1.41439	1.15831	2.16926	2.74319	0.682468	0.742531	2.15826	4.13909	1.71965	1.26509	2.53134	3.07045	4.82642
ENSG00000160408.14	ST6GALNAC6	10.996	0.388811	0.612602	1.57558	0.0234414	0.197944	0.0465603	0.247452	0.313307	0.261261	0.420134	0.213719	0.742148	0.290545	0.128777	0.227748	0.207345	0.409783	0.295031	0.330402	0.212368	0.348111	0.300628	0.395249	0.339773	0.663522	0.547548	1.08012	0.665891	1.25408	0.331334	0.396318	0.12889
ENSG00000182771.18	GRID1	14.5032	0.494152	0.760842	1.53969	0.0188788	0.236318	0.145914	0.151598	0.178521	0.409381	0.634813	0.328051	0.592676	0.32519	0.484284	0.380659	0.408441	0.238496	0.924592	0.473344	0.470379	0.275731	0.395853	0.464498	0.845086	0.712936	0.774113	1.52869	0.489764	0.596536	1.31031	0.473148	0.253896
ENSG00000137491.14	SLCO2B1	132.799	3.44397	6.45691	1.87485	0.0109928	1.84368	3.93883	2.69765	4.38092	3.84268	2.43676	1.80798	8.14481	4.26408	1.0828	1.72037	5.35784	3.82377	2.23114	2.58615	2.76217	9.77509	5.34026	3.74894	2.90339	8.55012	5.27477	19.3645	9.08381	3.93819	6.18632	2.96325	2.74903
ENSG00000132554.19	RGS22	8.53248	0.282482	0.545788	1.93212	0.00845922	0.0275156	0.194166	0.0977613	0.0475111	0.177046	0.175204	0.0891253	0.803004	0.0605816	0.021481	0.0506537	0.242107	0.170888	0.102528	0.477653	0.0932231	0.256838	0.250736	0.329653	0.755693	0.332043	1.32196	1.0171	0.63472	0.294174	0.230288	0.192818	0.0859997
ENSG00000137145.20	DENND4C	330.629	13.0478	10.5932	0.811876	0.0355772	15.0957	9.83297	12.7486	11.2525	13.556	18.9469	14.5076	11.6856	14.6052	7.36168	15.4613	12.9353	8.72871	16.7256	10.774	7.16291	11.8871	11.4078	12.3528	7.1481	10.0935	12.6269	13.4057	11.9499	9.2753	7.64079	13.2481	8.21293
ENSG00000138463.8	DIRC2	306	12.9318	8.83261	0.683017	0.0468106	17.9172	21.4388	8.32251	6.76757	7.44634	10.9281	12.1658	8.88055	18.2235	8.81829	18.2397	20.2572	18.6871	4.20895	10.1748	10.2272	7.29121	5.95037	7.83823	4.12295	7.11574	11.5044	7.81598	8.56376	11.2782	7.00877	16.1332	8.67389
ENSG00000074370.17	ATP2A3	172.419	4.36158	8.44582	1.93641	0.0155038	6.01978	2.27631	2.71736	6.09626	4.42526	7.19712	1.99805	13.0802	3.75619	2.81576	1.56642	2.64997	2.66595	2.06326	4.59581	6.8672	5.22628	5.65027	3.59462	5.20284	22.171	11.7261	17.1416	13.2014	6.9699	5.69718	3.10215	1.94499
ENSG00000171631.14	P2RY6	58.5179	1.67646	2.78238	1.65968	0.0299151	1.93752	0.901129	2.10342	1.3306	0.893597	1.54214	1.69121	1.63313	1.11495	1.89074	4.43824	2.04799	0.820442	0.360979	0.940815	4.86359	2.96657	0.967757	1.87944	5.84531	3.24735	3.03878	3.6275	3.20604	1.30773	1.95327	0.969813	0.997816
ENSG00000147118.11	ZNF182	140.114	4.33788	5.98813	1.38043	0.0198255	5.56435	3.61654	1.83054	3.24479	2.63329	4.58424	2.77804	7.53773	5.24792	4.19158	1.86449	6.19672	6.48717	2.83726	4.95351	4.56418	4.53625	5.75599	3.83758	6.42336	7.39538	6.82192	10.877	4.08151	4.52258	3.75829	7.18287	6.78871
ENSG00000159915.12	ZNF233	8.86265	0.316172	0.532313	1.68362	0.0123372	0.388974	0.121992	0.0511853	0.11194	0.0213915	0.171999	0.0199987	0.735756	0.0951569	0.202444	0.119344	0.217305	0.348943	0.289879	0.346274	0.248927	0.12278	0.393836	0.161811	0.791323	0.405648	0.547424	0.410809	0.218087	1.18083	0.253203	0.648994	0.236393
ENSG00000131471.6	AOC3	31.663	0.837159	1.68505	2.01281	0.0289862	0.812714	0.136547	0.748617	0.868715	1.24507	0.831684	0.376064	1.22354	1.0935	0.664685	0.712443	0.486462	0.312459	0.692189	0.852692	1.19318	0.816721	1.20319	5.5349	1.15145	0.518908	2.65378	3.06548	2.03655	0.735564	0.77736	0.464912	0.453594
ENSG00000185962.1	LCE3A	146.516	8.49713	1.68148	0.197888	0.0154295	1.94535	0.915169	41.4703	3.91887	16.3686	10.3225	41.4076	0	5.47287	1.51871	0.895303	0	0.805451	0.48325	0.432949	0	0.263166	0.695177	0.971104	0	0.86946	0	0	0	13.8654	0	3.89493	0
ENSG00000151502.10	VPS26B	212.916	6.84281	8.69797	1.27111	0.0279414	5.64431	4.68807	4.66965	6.17869	8.31417	6.89995	5.57344	9.96669	7.55145	4.97568	9.70706	5.66908	6.28967	7.56742	7.44689	6.10288	10.0066	7.32493	14.2969	9.98211	6.62656	11.182	8.4711	9.92861	6.28786	8.95061	7.56996	5.04337
ENSG00000117090.14	SLAMF1	52.6817	1.50028	2.53673	1.69084	0.0158038	1.02531	0.578814	1.45714	1.84121	1.17735	3.94981	0.60728	3.6156	1.50496	0.736407	0.566249	1.54656	0.713189	0.397332	1.28698	1.93141	4.51062	2.4402	0.737029	1.12637	2.25461	4.28114	4.24482	3.28164	1.41285	2.12813	2.46341	0.865239
ENSG00000213316.9	LTC4S	29.6627	0.738746	1.64473	2.22638	0.00085762	0.293761	0.41459	0.289921	0.634045	0.726989	0.233814	0.475759	1.51814	0.916271	0.573337	0.608386	0.184627	1.36832	0.656766	0.686472	1.09479	0.953755	0.472394	1.75972	2.18506	4.33271	1.4755	2.63713	1.05881	1.7448	0.860508	0.58816	0.918147
ENSG00000198223.16	CSF2RA	9.16296	0.326252	0.543783	1.66676	0.0137554	0.0914265	0.129032	0.198509	0.197332	0.0905035	0.436616	0.486512	0.472485	0.0838731	0.392564	0.0420769	0.172383	0.0567811	0.238471	0.305212	0.232315	0.296834	0.343051	0.136918	0.209246	0.919402	0.598977	1.25526	0.560202	0.271515	0.42085	0.274577	0.250033
ENSG00000126549.9	STATH	22.3834	0.272556	1.6227	5.95362	0.0427493	0	0.567775	0	0	1.11507	0.128082	0	0.0978384	0.531453	0	0.14812	0	0	0	0	11.2857	0	0.0862581	0	0.092074	0.6473	0.105427	4.07889	0.058001	1.72043	0	0.966572	0.754434
ENSG00000159753.13	CARMIL2	29.4142	0.743695	1.6199	2.17818	0.0173885	0.318372	0.561654	0.439894	1.0013	0.54027	0.959309	0.105228	2.87586	0.567448	0.248548	0.251183	0.485944	0.423701	0.25421	0.622516	0.762757	0.987513	1.02394	0.442729	0.910814	5.94584	1.52959	2.54584	3.04911	0.972503	0.418718	0.956152	0.213229
ENSG00000100580.7	TMED8	190.423	6.01269	7.92556	1.31814	0.0553749	5.73559	4.19022	3.58728	4.62169	4.46422	7.7876	5.98453	6.78292	7.51086	9.86846	4.77211	8.67975	5.434	3.36922	5.90188	9.60181	7.63127	9.05453	2.84632	5.30225	4.52378	7.86896	10.0484	6.14512	8.36305	10.1277	9.16439	11.0547
ENSG00000163319.10	MRPS18C	124.748	4.14485	5.02887	1.21328	0.0588187	3.95787	3.65616	4.03397	3.78978	5.30699	4.43891	4.22889	3.91579	3.6969	5.36509	3.0469	4.52272	4.11167	2.94955	3.65151	5.64409	5.91393	4.93738	4.06822	2.55279	2.99111	6.31745	5.43405	4.539	5.17173	3.85453	6.91578	5.73531
ENSG00000141480.17	ARRB2	230.31	7.31924	9.48625	1.29607	0.0569812	8.60992	4.94531	6.68723	8.74716	7.96802	7.58602	6.18915	10.1773	5.0404	6.87794	5.38165	7.04725	7.01361	8.23692	7.78061	4.38236	10.6615	10.6256	6.98675	5.86578	11.5444	10.0921	14.6337	13.1926	13.3199	7.20596	7.09586	6.41464
ENSG00000155368.16	DBI	1314.34	55.5756	37.193	0.669232	0.0327538	106.766	53.5752	32.341	26.2069	27.7344	58.2073	77.237	29.5713	58.8694	82.6965	90.9827	28.5949	44.9419	53.0959	61.3135	45.2981	48.1156	44.9981	69.2332	15.8909	32.1863	47.6982	25.426	38.3812	37.8825	16.8784	28.4319	31.7882
ENSG00000170426.1	SDR9C7	96.683	5.27728	1.56337	0.296246	0.0200765	2.28152	2.16996	22.047	6.2518	6.52997	2.0528	12.7604	0.663416	2.18403	1.85859	15.3394	1.1222	0.739281	0.665325	0.993453	1.64678	0.603865	0.425377	0.965602	0.794601	4.78819	1.25644	0	3.71837	2.47456	1.5774	0.695129	0.0775093
ENSG00000146374.13	RSPO3	27.3305	0.655246	1.56168	2.38335	0.000903887	0.165223	0.388638	0.456578	0.380387	1.11763	0.350684	0.203875	0.602726	0.828599	0.257974	0.304161	2.21529	0.410453	0.205218	0.441257	0.914305	3.01742	1.21038	0.494869	1.76467	0.590762	1.70787	4.07162	1.34984	0.327117	1.01406	1.7643	0.774606
ENSG00000169660.16	HEXDC	162.489	4.40946	7.62669	1.72962	0.0240823	2.62179	3.64576	3.86606	7.4563	2.72891	5.7693	2.58691	8.3452	2.65985	3.64208	2.09384	8.82047	3.92704	3.13192	3.34651	1.98553	5.22623	5.91076	7.30413	15.0011	19.4379	6.80327	9.60992	7.14292	4.67166	5.55022	6.79318	2.41011
ENSG00000137078.8	SIT1	27.4004	0.677572	1.54129	2.27473	0.0108331	0.263876	0.279309	0.312512	0.455634	0.65303	0.84011	0.183153	1.76478	0.871471	0.515009	0.0607214	0.829222	0.655529	0.0983252	0.880907	0.670511	1.07091	1.13156	0.197587	0.301964	2.47668	1.90165	3.4836	3.99459	0.94038	0.772966	0.660406	1.13402
ENSG00000082701.15	GSK3B	645.34	26.3866	19.4109	0.735637	0.0224244	26.8762	34.1741	26.3215	17.4212	21.1118	15.7362	23.8694	19.499	34.9277	16.8089	54.2089	23.6913	33.1434	16.7976	29.7114	17.3677	20.6822	14.5675	17.9385	12.1843	17.241	17.4485	19.9057	17.2386	23.8938	25.0449	26.9483	20.581
ENSG00000120885.21	CLU	274.713	7.11386	13.1389	1.84694	0.0360206	7.30389	21.662	1.31632	3.40422	9.20798	6.23467	3.34297	9.33191	6.16637	10.4124	3.54413	7.65075	3.12271	6.94197	5.56565	16.6764	4.15632	13.0787	13.2367	9.35748	8.05459	21.8913	9.50261	20.8125	33.4479	3.34437	13.1136	2.83285
ENSG00000137486.16	ARRB1	128.316	3.933	5.54778	1.41057	0.0485584	4.38606	2.2471	4.23385	3.73482	4.69864	4.20833	3.73936	6.61191	3.40636	2.13421	3.06935	4.53141	3.95539	2.30597	4.23218	6.01524	5.07186	4.79872	3.68913	3.19712	8.53944	7.99071	9.83562	7.83941	4.85336	3.41942	3.45852	2.11262
ENSG00000170270.4	GON7	186.022	5.92904	7.68357	1.29592	0.0227908	6.22041	5.78127	3.95298	3.79856	3.1539	8.45297	4.63343	5.53457	6.90346	10.6599	4.25929	7.43756	5.08816	4.97488	6.58428	5.03739	8.92802	6.34334	5.11218	9.20166	7.93363	5.10238	8.65261	6.01522	9.91242	6.09493	10.1761	10.0765
ENSG00000176903.4	PNMA1	241.466	7.07783	10.623	1.50088	0.0402294	9.39628	3.14832	9.07331	7.76209	5.52063	7.80163	6.31854	13.2752	11.5098	5.33013	2.98665	8.24221	5.33184	4.2317	4.73904	4.67214	7.24265	12.03	10.2247	8.58656	5.98215	8.29649	13.9932	8.47898	3.77417	17.482	17.8655	18.1701
ENSG00000123131.12	PRDX4	428.791	13.0327	18.1616	1.39355	0.0258057	14.4369	8.30574	9.03897	10.8763	12.9257	10.1734	21.8706	7.43572	23.2152	11.486	14.8543	13.408	10.451	10.3477	15.1646	25.4219	20.1148	13.7027	15.4923	16.7312	7.7676	20.3222	11.1684	15.9751	12.5619	34.863	16.7539	23.9263
ENSG00000102144.14	PGK1	1206.75	52.622	32.3243	0.614273	0.037837	51.7431	34.944	95.0989	36.226	100.193	55.0637	114.379	14.851	49.5954	36.0307	68.1808	28.9867	24.146	49.3788	29.012	35.0182	34.1352	57.8723	37.0084	25.2986	13.6287	22.2666	20.2287	36.132	27.3182	30.8377	33.8015	45.3697
ENSG00000026950.16	BTN3A1	332.88	9.51056	14.8478	1.56119	0.0148626	4.16636	7.10506	6.99022	11.1998	8.49855	9.77256	5.72523	17.4439	7.74853	5.42101	6.37704	9.7203	8.38993	25.498	7.10187	11.4529	24.7225	14.0765	8.88647	21.5993	20.5256	23.9734	21.8011	11.2399	7.38637	11.3591	7.07786	7.62077
ENSG00000063761.15	ADCK1	54.9398	1.76483	2.40518	1.36284	0.0333608	1.97572	0.58091	1.37792	1.73416	1.20606	1.99188	1.14277	1.58161	2.18707	2.87917	1.25784	1.49007	2.69948	0.515334	2.35244	2.45438	0.97555	1.71212	2.0465	3.39134	3.62043	1.82652	3.30382	1.68533	1.95581	2.25985	2.70308	2.03263
ENSG00000114654.7	EFCC1	36.4096	1.04498	1.81038	1.73246	0.0522496	1.90242	0.335614	0.539795	0.769897	0.941606	1.2776	0.550186	2.53018	1.15622	0.742593	0.601936	1.41984	0.479989	0.132914	0.793863	0.825817	0.434291	1.49776	3.02707	2.7893	2.94937	1.68778	2.13478	1.07139	1.27119	0.696588	3.5709	0.278718
ENSG00000133561.15	GIMAP6	95.1683	2.5535	4.58967	1.7974	0.0148602	1.16333	2.05229	2.20794	2.8972	2.39176	2.24361	1.30435	7.20899	2.93896	2.72459	1.33849	2.58714	2.41759	1.53385	1.79243	2.13744	6.82765	4.24514	2.74728	1.84327	4.67948	5.80409	11.9556	8.3538	2.71071	2.62133	2.8667	1.57326
ENSG00000213741.10	RPS29	211.168	6.78415	8.63122	1.27226	0.0256157	6.90012	6.95231	5.72876	4.92851	4.30425	8.12481	6.13063	6.4442	5.91892	7.63595	5.22177	7.22036	8.60389	5.69887	10.4488	15.1774	6.59665	7.7691	8.4958	6.18662	4.74516	7.52655	8.84636	7.44826	8.06995	8.85594	9.86293	11.3251
ENSG00000165688.11	PMPCA	206.338	6.67147	8.38971	1.25755	0.0200314	5.20729	5.39936	7.59346	11.5833	5.48346	6.89365	3.73726	5.02358	7.38009	6.28454	6.32147	7.9481	8.41507	5.64281	5.65856	7.71402	9.19722	7.83261	11.7173	12.4955	9.26192	7.00873	5.5557	6.32008	8.80525	7.09314	6.17042	8.59436
ENSG00000086730.16	LAT2	65.6169	1.83549	3.14497	1.71342	0.0265191	1.61792	0.761131	1.94654	2.69388	1.90665	1.59436	1.69338	3.81761	1.56906	1.68411	1.34739	1.21054	1.6747	0.68899	1.8261	1.89243	3.97094	2.56045	1.55761	1.19022	6.97289	2.67517	4.06842	7.27548	1.18977	2.99835	1.42685	1.80599
ENSG00000197629.5	MPEG1	297.542	7.61696	14.3144	1.87928	0.0414301	4.09917	8.65002	7.04865	4.21959	5.13076	7.05864	5.43504	19.8422	10.0087	5.60027	2.88424	16.201	6.97653	3.2311	6.36851	6.28967	25.4018	15.6556	3.12843	4.2849	9.08998	29.9887	29.8053	25.8842	11.8926	8.14801	9.98283	5.23563
ENSG00000104419.14	NDRG1	4335.88	194.676	109.118	0.560513	0.0366364	316.316	99.2609	307.126	370.343	288.501	104.795	328.843	23.7214	169.45	96.9015	160.621	70.9314	120.315	230.59	230.925	74.2877	66.3891	95.2246	190.142	90.8044	58.336	41.407	39.7754	321.224	103.916	206.738	41.7704	87.2242
ENSG00000197256.10	KANK2	187.758	5.87141	7.88363	1.34271	0.0223734	4.12604	3.28361	4.20784	9.12321	7.89649	3.1016	5.72768	9.32362	7.2675	4.31274	4.76839	6.68467	3.51633	6.69641	6.53505	4.24808	7.37712	6.7579	9.02829	8.47264	10.5728	7.4387	14.2108	7.35317	4.71074	6.38848	7.89388	6.73452
ENSG00000169299.13	PGM2	498.484	20.4334	14.9833	0.733273	0.0229267	16.0712	17.7116	12.1104	18.2008	19.6757	25.6208	34.8425	9.74242	26.781	23.1373	31.0649	14.2003	18.3477	19.7266	17.768	21.7638	13.7544	15.0756	11.4676	9.84456	11.3448	12.4903	8.38683	25.8622	18.7542	9.37585	14.7164	20.6462
ENSG00000143196.4	DPT	27.0044	0.670831	1.51861	2.26378	0.0402888	0.784241	0	0.619191	0.253902	0.727803	0.390127	0.680416	0.655616	2.33821	0.306122	0.0902321	0.49289	0.304412	0.657502	0.261806	0.697466	0.676333	1.94424	2.93615	0.11218	2.36594	2.91149	2.79539	1.62533	0.349352	0.0820449	0.490682	1.45536
ENSG00000175567.8	UCP2	175.481	4.70546	8.28454	1.76062	0.0252738	4.27292	9.61818	2.54092	2.6617	3.34635	3.83146	1.65183	13.2197	5.43825	5.91155	2.0163	5.16705	3.25838	1.81387	4.33351	4.65454	12.6656	5.85649	3.72601	5.63241	9.5004	16.8908	15.9375	11.9309	10.0874	2.80661	4.38585	2.32444
ENSG00000113161.15	HMGCR	318.466	12.9423	9.77939	0.755616	0.0292116	9.6626	20.7735	17.8604	10.7013	11.5032	10.7626	20.3613	12.88	12.4565	8.73103	16.5303	9.98573	10.4974	12.7433	7.18494	12.2263	10.1637	11.7934	11.4962	3.90068	9.97185	7.40702	6.30745	12.6312	7.32868	9.12438	14.0161	9.46512
ENSG00000159917.16	ZNF235	91.4018	2.91655	3.88105	1.3307	0.023552	3.42036	2.64053	1.7311	2.9782	2.56108	3.21101	1.89382	3.99914	2.05967	2.21377	2.30067	2.756	2.95942	2.89756	4.62589	3.57551	2.14742	3.2594	3.02082	5.2522	3.64537	3.8688	4.60035	2.08629	7.4316	3.42537	3.48261	3.35785
ENSG00000133392.17	MYH11	87.0809	2.17705	4.40193	2.02197	0.0556311	3.96826	0.506344	0.73392	0.506858	1.74347	5.8583	1.65008	2.28047	2.60115	1.51927	2.48176	0.915615	0.776492	3.79182	1.82197	6.22499	0.675073	6.865	3.90757	1.44318	2.40527	11.2681	8.27868	2.62546	1.92431	0.646038	7.52066	2.14075
ENSG00000129566.12	TEP1	251.636	7.73388	10.6483	1.37684	0.0326848	6.36773	4.20988	6.44313	10.755	6.75479	10.0259	5.80721	10.4682	7.38997	7.52917	7.63948	9.86921	7.41992	5.26379	8.56497	5.62388	7.71516	9.46111	12.4294	15.5641	20.3089	8.01282	16.0947	11.5648	7.63771	9.24882	6.49842	6.96821
ENSG00000162782.15	TDRD5	64.6716	3.20205	1.49545	0.467031	0.0375952	1.48095	4.49951	1.4616	0	0.0610835	1.83359	3.54059	3.60163	4.60415	4.88155	6.19097	7.18762	5.05867	1.71681	0.411994	1.2265	0	0.0441019	1.879	0	3.86109	0.161707	0.347574	0.0296546	0.146603	2.03135	6.2597	2.15363
ENSG00000100060.17	MFNG	67.0897	1.95079	3.12521	1.60202	0.0357868	1.43887	0.60921	1.09061	4.67084	1.59527	2.06144	2.1572	3.56927	1.37279	0.898642	2.80776	2.38741	0.857877	1.6299	0.614839	1.54047	4.57815	1.85106	3.66319	1.84414	4.86177	3.39361	5.53148	4.48083	2.87153	2.89018	0.921876	0.899434
ENSG00000162139.9	NEU3	117.34	3.67145	5.00527	1.36329	0.0227209	5.88549	2.97587	2.80823	3.52085	3.32591	5.90167	1.77984	4.8885	2.93345	1.59187	2.94327	5.79606	2.25933	3.71264	3.24884	7.85828	3.97779	3.93728	2.8281	4.8789	5.65448	7.19558	6.90107	3.30725	4.40404	5.83724	3.71142	3.27707
ENSG00000162645.12	GBP2	414.45	11.9031	18.3618	1.54261	0.0323868	8.31331	11.4965	14.1737	13.7284	9.19593	14.2107	9.74606	19.2339	14.1167	7.6879	8.31964	11.7822	10.8632	12.7234	11.4549	10.9354	46.2037	17.2116	6.49646	15.1318	20.5728	23.918	27.9604	15.6254	12.4934	20.3128	11.7574	8.78458
ENSG00000152661.8	GJA1	2142.85	99.795	49.9019	0.500044	0.044051	75.2549	51.5477	90.7657	90.6141	187.101	81.7011	99.34	48.0311	268.62	44.333	16.9984	139.151	82.2289	205.866	13.8714	32.2746	50.1734	82.8224	48.706	11.7993	8.9417	30.2696	52.9861	47.9251	46.1908	78.0103	29.58	127.745
ENSG00000113845.9	TIMMDC1	664.302	26.5598	20.6697	0.778233	0.0334482	27.5128	34.1227	25.1151	22.535	23.1403	16.5897	35.1658	20.4708	31.4174	13.9187	31.7882	24.3454	35.369	19.3088	36.0966	27.9207	20.1192	15.6759	18.9685	11.6689	12.8126	24.3694	15.9849	16.3195	20.2648	29.6822	24.2042	29.4154
ENSG00000189233.11	NUGGC	67.4647	1.76522	3.36818	1.90808	0.072981	1.72473	0.873791	0.715789	3.16898	1.48843	3.9775	0.757149	3.57606	2.01228	0.517871	1.18047	0.945007	1.23595	0.560272	2.24403	4.37505	2.49472	3.36614	0.298028	2.58096	6.70048	7.08873	7.37957	2.23155	2.52161	1.81361	0.841163	0.794769
ENSG00000177485.6	ZBTB33	312.971	12.681	9.65815	0.761623	0.04391	12.6541	14.0221	10.082	4.5805	10.6181	14.0848	13.8456	13.1432	10.2785	13.249	7.91669	15.4504	15.1858	17.1907	16.4134	10.2045	8.19811	15.297	9.74668	5.16626	3.71153	11.1401	10.9978	5.58242	11.0782	6.70193	15.0761	11.3553
ENSG00000124203.6	ZNF831	27.2063	0.718779	1.47881	2.0574	0.0218293	0.392256	0.287444	0.393084	0.755457	0.560042	0.73249	0.104716	3.31131	0.509324	0.388673	0.0972066	0.303422	0.496596	0.123675	0.82598	0.608257	1.05924	1.43947	0.327606	0.604253	3.74231	2.07565	3.12299	2.58837	1.21867	0.30304	0.634331	0.200402
ENSG00000172586.7	CHCHD1	182.757	6.00704	7.34239	1.2223	0.0228197	8.61832	5.24849	7.08417	5.19823	4.67469	7.79927	7.15641	5.67054	4.59215	3.59451	8.20443	4.15517	5.71908	4.66306	6.22711	7.07974	10.5887	7.53069	9.01692	8.64639	6.17357	6.65176	5.73556	6.46795	5.32924	5.63206	7.91855	7.37985
ENSG00000176293.19	ZNF135	23.3152	0.477329	1.4581	3.0547	0.0135758	0.681995	0.0385004	0.0969235	0.141312	0.324053	0.195416	0.214592	0.895637	0.470489	0.298157	0.150659	0.617227	0.897944	0.345609	0.291421	2.64333	0.143925	0.599533	0.674083	7.61704	0.914436	0.869783	2.10321	0.511291	0.324058	0.616449	0.382332	0.255788
ENSG00000109107.13	ALDOC	118.33	5.55702	2.90576	0.522899	0.0392499	13.5736	11.9835	1.72321	9.4989	6.59991	6.3775	6.03185	2.47216	5.26613	3.50111	4.51321	0.601299	2.04251	5.03551	2.63496	3.0996	1.21337	5.64119	5.01472	1.3001	1.44316	1.51476	0.820978	2.93111	2.9123	0.700632	6.28536	3.59765
ENSG00000145416.13	2019-03-01	60.9424	1.78738	2.8409	1.58943	0.0269289	1.34407	1.51752	1.38619	2.37882	1.37208	2.43377	0.987323	3.5956	1.55361	1.46901	0.610844	2.91435	0.959956	1.77793	1.00956	2.4647	4.25469	2.58465	0.893199	0.922843	2.32028	2.9719	6.8669	3.51223	1.99578	2.12325	2.9097	1.81163
ENSG00000111726.12	CMAS	387.785	15.5348	12.1202	0.780196	0.0268631	14.9227	13.7752	12.1246	14.4565	23.2317	15.2612	17.865	17.038	13.849	14.6979	17.3293	9.81506	7.75915	18.4272	20.9695	13.9917	13.7321	10.8359	12.4732	6.75124	8.02677	11.6713	8.15508	11.6954	9.58484	16.2652	11.7253	21.3544
ENSG00000139190.16	VAMP1	155.562	4.55076	6.9308	1.523	0.0138292	5.2818	2.79536	2.6643	3.63113	3.53406	5.29386	1.69724	12.7559	3.85839	2.2526	1.44049	5.10231	5.19381	5.28471	5.97543	3.33042	4.72375	6.86827	10.8395	3.69366	8.91803	10.1034	11.2599	6.45152	4.7638	6.75358	7.19691	3.89777
ENSG00000137474.20	MYO7A	43.0434	1.24591	2.08883	1.67654	0.0357784	0.793708	0.864482	0.89913	2.77078	0.777156	1.42828	0.415174	2.3499	1.03838	1.02375	0.198525	1.3447	1.03946	1.42732	0.81794	0.584585	3.01109	1.7573	2.31268	2.21145	4.7196	1.24347	3.58995	2.26375	0.778877	1.68959	0.708203	0.984201
ENSG00000013275.7	PSMC4	978.349	39.5519	29.8362	0.754355	0.0178451	33.9601	35.1441	33.965	30.6492	31.548	30.2409	43.6808	26.2218	46.698	62.5869	61.5723	57.0703	33.1629	27.2762	38.0023	34.2935	35.6018	26.9712	14.9388	28.9576	20.2595	27.5187	24.9438	25.9611	49.0545	47.5754	22.4689	28.0256
ENSG00000198019.12	FCGR1B	8.60659	0.314577	0.514457	1.63539	0.0789109	0	0.292162	0.224738	0.178725	0.28177	0.453114	0.335267	0.251725	0.246884	0.0808061	0.190546	0.19516	0.160709	0.154274	0.17277	0.192875	1.00817	0.527085	0.155009	0.0592235	0.208177	0.429477	0.874535	0.708836	0.0614782	0.216572	0.259048	0.687457
ENSG00000123685.8	BATF3	54.4811	1.60091	2.55903	1.59848	0.0271825	1.35522	0.318774	1.5031	2.45149	1.56513	2.56825	1.43336	3.57051	1.61031	1.20914	0.564308	1.05455	0.761512	1.29852	1.24954	1.59609	5.57857	1.66043	2.89935	1.18159	2.24976	1.18382	3.88494	3.58208	0.843268	3.4027	1.93813	1.96659
ENSG00000139496.15	NUP58	255.014	10.1171	8.15826	0.806385	0.0284252	12.2131	6.85192	9.78199	6.30906	9.4207	12.395	8.30982	10.796	11.4475	9.03617	12.0147	14.8237	8.53444	9.53981	8.78237	5.68022	6.70186	9.33806	6.54111	4.22929	5.45102	8.89282	10.4324	7.6535	9.99792	8.15474	10.225	11.4594
ENSG00000113812.13	ACTR8	160.885	5.26676	6.51414	1.23684	0.033698	4.13375	5.98596	3.50176	5.0559	4.68878	4.48974	4.52297	6.99008	5.54614	4.80712	6.30191	6.27859	5.02763	3.52989	6.64118	4.2745	6.20375	7.77842	6.15836	6.94781	10.4502	5.66092	7.86752	4.50085	7.26347	4.32461	6.94017	5.01323
ENSG00000114904.12	NEK4	148.828	4.94296	5.96026	1.20581	0.0267537	4.02707	5.93478	2.83347	4.65934	3.68811	4.7534	3.96771	7.5618	5.09672	4.79066	3.78238	5.85399	4.90001	4.7773	6.01766	3.96319	4.61395	5.47733	4.71801	8.1508	6.90561	5.61167	5.93123	5.68745	6.28075	4.99828	7.29499	6.55015
ENSG00000136231.13	IGF2BP3	397.653	18.6435	9.29237	0.498425	0.0977879	18.0204	31.9067	5.31921	28.2208	1.63927	31.7151	30.4032	6.37863	10.4776	35.2027	14.8165	17.2213	0.178863	18.0286	28.6232	23.4874	3.63998	15.3052	14.1866	28.4134	14.5084	4.44746	1.99879	4.44872	0.953031	1.13631	6.58994	0.385771
ENSG00000075239.13	ACAT1	83.3311	2.66592	3.5494	1.3314	0.0513902	3.04136	2.43379	1.57197	2.27384	1.5674	3.19434	3.00324	2.21132	4.07295	1.88478	1.84704	3.54706	1.83044	2.82733	3.18199	2.66633	5.77702	3.00841	3.96772	2.33219	1.30326	4.50545	3.87436	2.32802	2.45822	3.59508	4.95934	4.06688
ENSG00000213088.10	ACKR1	26.0598	0.670932	1.44583	2.15496	0.0085778	0.221249	0.104084	0.553171	0.318358	0.766554	0.469598	1.02378	1.56937	0.324752	0.287876	0.407299	0.278107	0.870253	0.384727	0.984805	1.12439	0.628538	0.513915	0.994011	0.928342	1.18663	2.64132	2.88191	3.66828	1.31412	0.555514	0.885956	0.172878
ENSG00000183621.15	ZNF438	104.913	3.34235	4.42905	1.32513	0.0302174	3.40562	1.79516	3.91994	3.29448	3.61494	2.02482	3.3416	3.39277	6.59482	1.31334	3.24802	2.57881	3.23634	3.66939	3.20527	4.29557	5.06226	4.31085	4.91583	2.06598	3.30097	3.53046	7.10691	5.14661	2.68079	3.77749	5.62743	4.45647
ENSG00000151500.14	THYN1	159.165	4.99741	6.69259	1.33921	0.0128545	3.55286	5.59726	1.92445	5.35004	5.11191	5.98449	3.36447	11.0015	4.45695	3.61221	4.48708	3.42732	3.28414	6.40381	5.90274	5.68264	7.94713	6.95341	10.827	6.7131	5.20691	8.62492	6.37017	5.24138	5.20197	5.80874	6.86529	4.261
ENSG00000169714.16	CNBP	4085.96	163.044	126.392	0.775204	0.0283012	185.439	159.388	208.105	106.602	131.267	118.382	189.357	128.821	237.716	141.72	204.642	132.137	198.512	122.691	179.379	156.898	129.351	110.164	108.172	52.9215	51.6532	163.931	106.896	93.6588	133.617	167.368	192.099	175.069
ENSG00000005844.17	ITGAL	174.605	4.33005	8.65035	1.99775	0.0134202	3.24626	3.14978	3.34266	4.60102	3.29383	5.51212	1.52717	17.9442	4.66563	2.1964	1.31971	4.45456	2.62095	1.1693	4.40709	4.69264	12.922	8.99047	2.24845	4.33397	20.0948	12.0517	15.6853	14.6842	4.65964	3.69048	4.71219	2.38857
ENSG00000198400.11	NTRK1	8.77643	0.32127	0.519799	1.61795	0.0106214	0.0401932	0.0850881	0.428413	0.242905	0.47745	0.28792	0.148788	0.610928	0.117992	0.0941346	0.073992	0.353657	0.0499246	0.119814	0.18785	0.204263	1.19077	0.258537	0.451443	0.321963	0.431137	0.667089	0.382045	0.347686	0.238729	0.605505	0.201184	0.157029
ENSG00000160180.15	TFF3	25.0554	0.627908	1.41822	2.25864	0.0449889	0	0.528886	0.0591757	0	2.37417	0	0	0	0.110012	0	0.137975	0.188421	0.0930958	0.22342	4.20346	7.66866	0.121669	0.24105	0.448969	0.34307	0.200988	1.37488	0.791565	0.216113	4.98584	0.125456	0.150061	0.468507
ENSG00000155926.13	SLA	113.02	3.09456	5.33862	1.72516	0.0414154	2.17792	1.77953	2.61554	3.12724	4.11897	2.5181	2.0686	9.0182	2.92757	2.1477	1.64594	3.86148	1.97909	1.21303	3.7195	2.33792	7.85259	7.20118	1.21881	1.36419	6.48594	7.3796	12.6388	6.8253	3.81266	4.0293	4.26876	2.687
ENSG00000275004.3	ZNF280B	6.39149	0.261811	0.404948	1.54672	0.0447219	0.152963	0.0431759	0.0483084	0.0792363	0.166561	0.146098	0.0707801	0.409201	0.213295	0.119416	0.168955	0.423	0.151998	0.0911952	0.14298	0.642619	0.310391	0.213181	0.0916296	0.0350084	0.287136	0.267235	0.646198	0.35285	0.581459	0.128021	0.336884	0.0717127
ENSG00000186469.8	GNG2	65.9275	1.8963	3.09869	1.63407	0.0653288	0.878291	1.04587	1.99366	1.42176	2.11922	1.83503	1.05412	4.856	2.59847	1.77845	0.972637	2.5185	0.954571	0.920441	1.99744	1.38554	4.45554	4.19297	0.73986	0.565348	2.20806	3.83606	6.5801	3.71963	1.79322	3.03218	4.09398	2.38051
ENSG00000163832.15	ELP6	104.573	3.51874	4.19935	1.19342	0.0477246	3.59359	2.61043	2.37832	3.87815	3.08649	3.99594	2.64099	4.20909	3.04459	3.42431	3.40502	4.25138	3.34774	3.78082	3.63427	2.61407	2.98117	4.27745	4.86724	5.44273	5.59782	3.20835	4.13019	4.72383	2.76219	3.93642	4.49686	4.25319
ENSG00000135074.15	ADAM19	279.857	7.79108	12.7531	1.63689	0.0606452	6.86328	6.94395	9.77905	9.69253	7.53638	7.61523	2.65002	17.9901	10.6327	4.1516	2.9704	7.94146	4.60123	10.111	5.8873	5.56682	22.8733	10.72	8.18518	3.45885	17.9478	11.1369	24.3858	20.0029	4.21145	19.4007	6.46121	10.1395
ENSG00000225921.6	NOL7	954.614	29.1236	40.0431	1.37493	0.0483131	33.1388	31.4666	24.9786	31.2849	18.9577	26.451	34.6214	28.9379	35.241	24.4784	23.4603	28.9107	38.3053	24.3465	30.7754	72.3264	46.4809	41.3639	46.1131	75.8441	39.1467	37.9682	22.3081	25.3097	27.4334	27.9708	18.0441	38.9506
ENSG00000197872.11	FAM49A	78.6668	2.37716	3.5238	1.48235	0.0498665	3.82429	1.63279	1.77614	1.83119	2.3064	3.81124	1.59115	4.02502	2.60619	1.80639	1.22759	2.90849	1.3572	1.84412	1.60926	2.11227	4.70829	4.06541	1.68446	1.21359	1.59433	5.58642	5.70206	5.81475	1.94696	3.38896	3.60324	3.08864
ENSG00000250312.7	ZNF718	128.15	3.56505	5.95956	1.67166	0.0183892	1.24525	3.48977	1.47476	3.04094	3.15213	3.4548	2.28837	5.88374	2.83307	0.666613	3.94618	3.57774	6.03229	5.80666	5.08348	9.58295	5.0248	2.95602	5.0351	8.26492	4.34111	3.51191	5.48604	3.15461	3.6347	3.12658	6.12614	15.9294
ENSG00000160199.14	PKNOX1	124.142	4.94202	4.06245	0.822022	0.0244659	4.29606	3.89076	4.95185	3.828	5.1055	5.61362	4.19904	4.86077	4.94854	4.82454	5.72003	6.06428	5.57876	2.70509	6.04345	3.23014	3.66415	3.94064	3.83612	2.41864	4.22009	4.10392	4.22179	2.96439	3.57505	3.32635	6.87656	5.13396
ENSG00000164691.17	TAGAP	84.2486	2.47284	3.84277	1.55399	0.0656369	1.79835	1.35966	2.78903	3.21609	2.64909	4.0896	1.94166	5.44086	2.10542	1.63793	2.71941	1.82993	1.24984	0.478641	2.28704	2.21952	6.60328	5.43952	1.18627	0.979961	4.70771	5.47947	4.56734	6.01883	2.59404	4.47947	1.97175	2.40887
ENSG00000120314.18	WDR55	142.554	4.60996	5.86189	1.27157	0.0336769	3.69554	3.1712	4.80894	5.79023	5.60025	4.46657	3.53616	4.41049	2.68706	3.91796	6.62466	2.63804	5.58201	5.1001	5.62016	7.24953	7.89703	4.20639	5.84181	6.1868	8.74784	4.35403	4.36073	7.58083	4.36285	4.48666	3.67671	5.95342
ENSG00000143119.13	CD53	397.378	10.4576	18.7165	1.78975	0.0625623	5.45096	10.908	10.92	7.86688	11.718	11.6559	7.75514	28.9863	14.3003	6.98661	4.86759	11.4537	8.08445	3.27407	11.1356	12.2109	35.8245	25.6863	4.26437	3.53783	15.9266	22.7418	40.1268	36.7722	10.9209	12.3926	11.5653	10.0442
ENSG00000165259.13	HDX	12.8298	0.450979	0.68193	1.51211	0.0178997	0.192981	0.119156	0.457099	0.354045	0.286549	0.211199	0.178594	0.791981	0.33637	0.188321	0.166528	0.363861	0.764058	0.467404	0.386541	0.833621	0.558022	0.594799	0.397379	0.220836	0.258753	0.442507	1.27383	0.521673	0.515797	1.17097	0.362231	0.414672
ENSG00000122882.10	ECD	304.3	10.1426	11.9201	1.17525	0.025935	11.7291	11.9962	10.1229	8.15843	7.33307	10.4694	11.0964	15.475	7.51027	5.93148	9.1133	11.2216	12.2685	8.67019	9.5432	12.7742	13.2011	13.7706	13.4761	11.8462	10.8877	11.5316	11.9361	9.10548	12.0716	8.62422	11.932	12.5042
ENSG00000215421.9	ZNF407	200.835	6.50896	8.15385	1.25271	0.0372091	5.48656	4.52029	4.80816	6.32402	6.1705	8.55096	5.04432	8.9158	7.65269	5.31485	5.90283	4.60371	8.72385	6.81823	7.29763	7.93175	5.88723	8.20696	9.23823	11.6201	11.3814	6.90671	10.9216	7.75483	8.51373	5.44538	4.62982	6.26223
ENSG00000198342.9	ZNF442	15.0011	0.476945	0.818994	1.71716	0.0215716	0.426444	1.09085	0.157826	0.39118	0.461714	0.445489	0.283657	0.550957	0.176045	0.0832294	0.441587	0.502532	0.165529	0.139038	0.338108	0.478588	0.540834	1.08578	2.11547	0.274498	0.53605	1.11753	0.900762	0.826159	0.538236	0.13384	0.32018	0.478991
ENSG00000177272.8	KCNA3	88.0625	2.21292	4.43606	2.00462	0.0559616	2.1127	1.29848	1.07617	1.94167	2.36123	5.04471	0.914532	6.21535	3.10105	1.22371	0.627305	1.45632	1.73537	0.355525	2.22963	5.63393	4.48068	4.16457	0.510311	2.02771	6.12243	10.7158	10.7966	4.42153	3.23831	2.28155	0.750482	1.22479
ENSG00000166278.14	C2	29.3409	0.953314	1.3724	1.43961	0.0250052	0.347886	0.535612	0.724133	0.982954	0.829629	1.51033	0.600002	1.07679	1.20695	0.395039	0.611316	1.55039	0.824947	0.801343	0.802395	0.578606	2.59268	1.42401	0.781479	1.30287	1.48417	0.953105	2.23789	0.889125	0.976788	1.61461	0.791509	0.914333
ENSG00000134490.13	TMEM241	84.1301	2.56246	3.73024	1.45572	0.0319549	4.31551	2.56945	1.19787	1.65914	1.9691	2.49564	2.0437	2.27532	2.51148	2.47415	2.12576	1.94945	3.20366	1.9598	4.18693	4.64902	1.60089	2.76504	2.82748	5.20848	2.48632	5.66931	2.27888	2.01722	2.40301	3.18855	7.5941	4.50481
ENSG00000105374.9	NKG7	79.0437	1.99787	3.99043	1.99734	0.0215904	0.749013	2.11419	2.95689	3.23329	1.57558	2.53369	0.606529	3.64315	3.77922	1.60804	0.689431	2.58912	0.581475	0.558193	1.25023	1.01506	12.3871	5.72127	1.1217	1.71425	3.76611	4.25285	6.92175	4.99441	2.66927	2.19407	2.06202	1.75577
ENSG00000173210.19	ABLIM3	127.13	3.22256	6.2763	1.94761	0.0187344	1.2601	4.10401	10.2552	3.70307	2.4228	3.54893	2.10807	3.38866	1.734	3.40526	0.925663	2.25406	0.451498	2.76305	4.51406	8.43175	4.69109	5.53351	2.88509	2.57894	10.7873	5.5566	3.83895	18.4992	7.59957	6.18579	1.26147	2.44259
ENSG00000187239.16	FNBP1	530.04	16.2302	22.2605	1.37155	0.030556	16.9246	17.4652	20.1278	20.1542	13.0248	19.9106	12.275	33.5796	14.6697	18.183	8.16761	14.705	9.62148	8.12519	15.0194	11.7198	24.3093	26.6332	20.7971	18.9728	30.6603	30.6921	34.4884	29.0475	17.3002	14.187	17.7131	11.5662
ENSG00000139908.14	TSSK4	17.0917	0.563508	0.87993	1.56152	0.0324298	0.727991	0.513713	0.251466	0.235691	0.360321	0.579431	0.252645	0.608591	0.534277	0.852496	0.335041	0.343153	0.282578	0.406895	0.668326	0.400796	0.147723	0.878004	0.817665	0.728935	2.19624	0.794901	0.961068	0.459185	1.08098	0.609282	0.637683	0.426624
ENSG00000160255.17	ITGB2	125.095	3.42485	5.88632	1.71871	0.026727	1.44249	3.25365	3.05064	3.29133	4.7555	3.07532	1.87132	8.70754	4.93406	2.11149	2.99927	3.75589	2.65561	1.61249	2.35616	3.04574	12.7955	4.72213	2.44955	2.77081	8.59994	6.60403	11.1267	10.4541	2.93749	3.90207	2.37237	3.44174
ENSG00000130812.10	ANGPTL6	8.04634	0.301466	0.486489	1.61374	0.0872696	0.401379	0.113295	0.126762	0.207918	0.198664	0.127788	0.0371458	0.341649	0.176745	0.18801	0.332506	0.302717	0.199424	0	0.267988	0.21758	0.521264	0.215151	0.721315	0.183726	0.968724	0.21037	0.763038	0.520812	0.286081	0.335929	0.080363	0
ENSG00000125743.10	SNRPD2	738.882	29.3501	23.1869	0.790011	0.0409243	28.527	36.1885	21.7496	26.6028	14.1734	29.1186	28.5164	19.7935	35.8791	40.716	46.2017	29.4255	23.4648	27.4263	30.9688	30.1754	23.7733	26.2053	20.6269	21.3062	12.7012	17.4529	18.6289	17.66	33.2407	24.6954	26.269	27.3948
ENSG00000221944.7	TIGD1	183.841	5.49409	8.01766	1.45932	0.0320576	4.73915	2.54349	3.34651	5.18646	2.51084	6.5878	3.21218	7.42662	3.99246	5.36729	2.42684	12.7531	5.05748	7.56103	8.20012	11.7369	3.30487	6.44026	10.6958	9.70066	12.2613	6.09307	4.79369	2.93512	8.88061	8.54725	10.2904	7.24962
ENSG00000018869.16	ZNF582	12.5245	0.437705	0.673763	1.53931	0.0216633	0.365842	0.479439	0.185688	0.496335	0.23281	0.374382	0.0483671	0.667287	0.460275	0.122403	0.16837	0.591248	0.42196	0.311588	0.139578	0.283309	0.254525	0.420219	0.469608	1.37556	0.560607	0.730454	1.21433	0.452096	0.434586	0.349928	0.627839	0.285859
ENSG00000172530.20	BANP	154.884	4.96302	6.40294	1.29013	0.0358507	5.41091	3.3637	3.56012	5.70961	4.60173	5.12705	5.56394	5.91379	5.20025	4.7271	5.21766	3.13083	3.80056	5.15254	6.46557	7.19467	3.96491	4.51174	8.48912	10.713	10.1053	5.55186	5.76	5.24715	3.95352	5.21147	4.94389	6.29157
ENSG00000255154.7	HTD2	10.5848	0.39729	0.571186	1.43771	0.0840529	0.495748	0.11661	0.326179	0.142668	0.0817906	0.526109	0.344093	0.351646	0.181916	0.193511	0.266183	0.103858	0.615777	0.492601	0.220663	0.307927	0.268258	0.531471	0.989893	0	0.443141	0.43305	0.610839	0.416928	0.687053	0.553213	0.496286	0.387364
ENSG00000113851.14	CRBN	107.332	3.46475	4.47389	1.29126	0.0218729	2.14838	3.00141	2.27021	3.05385	4.03856	3.60992	2.55054	5.07964	2.89859	3.20193	3.14599	3.70975	3.63891	2.87866	5.24498	3.55848	3.48757	5.04839	4.61479	3.50146	4.24815	4.40732	8.34247	3.34767	4.4339	2.45189	5.3659	4.05257
ENSG00000138758.11	2019-09-11	445.382	13.9346	18.3971	1.32024	0.0460568	20.8409	11.5254	10.113	8.83432	14.0695	15.99	8.9897	16.6737	13.7001	16.9126	10.2996	12.8398	9.13261	25.117	12.4815	17.1644	20.3574	22.2756	14.9759	15.9267	7.05198	15.1189	19.498	10.4068	19.2744	27.4439	23.711	24.6574
ENSG00000165733.7	BMS1	544.164	17.8721	21.4525	1.20034	0.0394961	18.224	15.1228	19.8624	20.0034	17.2353	16.2306	20.3765	16.5171	17.8993	21.0323	16.5249	9.65119	24.3614	17.452	16.0878	24.506	25.5606	19.9851	33.3285	21.9657	23.7086	19.7363	16.1465	16.5719	13.6007	21.0169	19.3289	22.1272
ENSG00000185418.15	TARSL2	210.913	6.64994	8.76644	1.31827	0.0354278	7.63882	5.25564	5.85024	9.10104	4.12113	6.59678	10.6747	7.54704	5.76034	9.09434	2.63669	9.02579	5.07624	3.44411	6.42624	7.05241	10.8969	6.8585	9.63795	6.94942	11.625	11.0767	8.592	4.90083	10.39	6.26534	13.0766	5.34204
ENSG00000172661.18	WASHC2C	362.653	11.8542	14.4339	1.21762	0.0246348	8.68961	13.6505	11.9398	9.99403	9.68092	12.8062	8.65277	14.6175	11.2787	14.7902	11.2345	7.17889	12.853	8.85563	20.0909	15.4484	13.6078	15.1916	15.3815	16.7956	16.5917	18.373	15.0146	11.1115	11.4896	9.04584	15.8611	12.428
ENSG00000113240.12	CLK4	209.112	6.60117	8.68422	1.31556	0.0210545	4.17598	7.82698	4.86717	7.70661	5.04151	5.94414	4.82572	12.0365	5.87821	4.72631	4.54544	6.61004	11.4444	5.36796	6.52047	7.29121	8.66215	8.13657	10.9029	7.68644	13.0649	8.63707	12.4378	7.78859	5.64309	4.19773	8.27254	8.87396
ENSG00000158006.13	PAFAH2	110.078	3.58173	4.55013	1.27037	0.0349127	2.23703	2.09403	2.88364	5.0057	3.54763	3.08866	4.22503	4.19131	2.69719	3.56411	5.06366	2.00851	3.57255	2.92596	5.12088	4.9496	3.09417	3.74417	3.07664	5.85125	4.89709	5.32395	6.36455	4.40995	4.50128	2.4836	3.51915	5.63625
ENSG00000123338.12	NCKAP1L	121.76	3.21304	5.87418	1.82823	0.0287003	2.61069	2.71675	2.60266	2.41086	2.59252	3.73502	1.54445	10.2872	3.86232	1.87043	1.89352	3.9047	2.88361	0.923539	2.85732	2.9894	8.76449	5.96077	1.65791	1.28577	6.60218	8.57358	15.1823	9.40978	4.12193	3.87213	4.03608	2.608
ENSG00000213145.9	CRIP1	24.4636	0.591629	1.41455	2.39094	0.012753	1.12729	0.19887	0.44502	1.03407	0.488209	0.616855	0.228211	0.599708	0.853176	0.605038	0.194553	0	0.350055	0.210024	0.423367	0.525148	0.714837	0.377661	2.163	1.69312	3.87321	1.38476	0.372051	1.42209	3.18039	0.825534	0.282128	0.27526
ENSG00000167208.14	SNX20	41.6	1.11951	2.12365	1.89695	0.0231138	0.304278	1.37419	0.996999	0.840634	0.978921	1.18671	0.619509	3.71847	1.22821	0.593863	0.518137	1.33866	0.699205	0.204084	0.690733	0.999971	3.27242	1.97353	0.683519	0.417837	2.24391	2.93704	4.82037	4.56234	1.01207	1.22238	1.4012	0.760815
ENSG00000155858.5	LSM11	34.0329	1.17667	1.47561	1.25405	0.0456348	0.824352	1.05083	0.860816	0.803535	0.842354	1.1006	1.16896	1.32575	0.839189	1.49472	1.19936	0.701942	1.53591	1.07014	1.3316	1.66674	1.85623	1.65347	1.47347	0.852048	0.927036	0.859468	2.10635	1.13098	0.821309	1.33535	1.51739	1.68304
ENSG00000163606.10	CD200R1	18.9969	0.560118	1.03039	1.8396	0.0134486	0.313847	0.253107	0.353994	0.348376	0.133148	0.392544	0.186718	2.04446	0.526478	0.385024	0.123806	0.619931	0.584751	0.0668259	0.568766	0.546848	1.36469	1.39391	0.973591	0.256534	1.02198	1.19453	2.32025	1.51905	0.319561	0.225146	0.538607	0.420396
ENSG00000139970.16	RTN1	17.8645	0.568406	0.933723	1.6427	0.0218278	0.197386	0.338269	0.233767	0.316481	0.404744	0.516206	0.287056	1.64584	0.331116	0.638399	0.62292	0.708892	0.280202	0.1471	0.357711	0.601872	1.56781	0.619714	0.232258	0.225877	1.13426	1.0099	1.63795	1.11798	0.435456	0.5664	1.27029	0.41863
ENSG00000106479.10	ZNF862	81.3183	2.29192	3.82611	1.66939	0.0888408	3.50994	2.21302	0.975676	1.55998	1.68586	2.03327	1.41272	3.15683	1.5471	2.04296	1.95947	1.98407	3.01829	2.10498	3.67468	3.85601	1.33175	1.8369	5.53633	6.89233	9.44029	3.63751	4.43081	2.88951	2.26978	0.764819	4.30383	1.24957
ENSG00000108405.3	P2RX1	31.7538	0.949998	1.56183	1.64404	0.116857	0.837923	0.186722	0.696395	2.09411	0.916776	1.75508	0.244881	1.39428	0.890068	0.482007	0.385634	0.443477	0.410841	0.657318	1.35447	1.47921	1.39604	1.39473	0.0990673	1.46354	2.66094	2.56182	2.51514	1.90746	1.83358	0.479829	0.971279	0.241216
ENSG00000127507.17	ADGRE2	99.0912	2.97023	4.4106	1.48494	0.0100048	1.66512	2.13508	2.42896	3.36604	3.27653	2.76379	5.06461	2.72849	1.93739	2.33037	2.85039	8.21901	1.13503	1.24091	1.91167	2.09147	7.3181	2.94978	4.43991	4.1595	5.25488	5.48998	5.34012	6.22121	2.79816	3.39903	2.56138	4.01431
ENSG00000100601.9	ALKBH1	130.903	4.18772	5.45283	1.3021	0.0160002	3.69371	3.69253	4.03427	3.29525	2.95561	4.50791	3.50381	4.11719	4.33733	7.40129	2.71991	7.11918	4.58801	2.43154	2.9183	5.69401	4.37222	5.24682	4.33309	5.7767	4.45736	4.51718	9.16746	3.28395	4.02213	6.69803	6.10123	5.91663
ENSG00000175697.10	GPR156	20.5209	1.16528	0.449361	0.385625	0.0648289	3.90162	1.0401	0.0570462	1.99612	0.257482	0.0460063	0.066866	2.14372	0.774185	0.225625	1.66262	1.99804	1.00515	0.129228	0.675367	0.215416	0.551267	0.0154917	0.173125	0.0992174	0.620017	0.315572	0.0915696	0.0833345	0.102995	0.435388	1.07049	0.7678
ENSG00000144591.18	GMPPA	125.782	4.06003	5.20626	1.28232	0.0330721	2.92241	3.24394	3.31846	4.84766	4.72941	3.92029	2.65897	4.43201	3.31355	2.7429	3.33976	5.73715	3.58918	6.68049	3.92431	5.27319	6.42318	3.62582	3.49138	6.3127	7.30855	5.39244	5.47932	4.66305	3.58856	7.66739	2.79409	4.36172
ENSG00000172007.5	RAB33B	80.371	2.70384	3.27795	1.21233	0.0544826	3.02946	1.37603	3.05172	2.40503	2.44736	2.93784	2.96475	3.00629	2.04445	2.77282	1.93911	3.10767	2.87627	2.75072	2.34816	3.24431	2.99594	3.24775	2.1902	1.91268	3.59508	2.55506	3.93503	2.15873	4.59146	3.0309	4.1831	3.67314
ENSG00000197134.11	ZNF257	23.8735	0.585795	1.37589	2.34876	0.0255783	0.104443	0.245671	0.164925	0.150285	1.27513	0.304809	0.0805477	1.58751	0.281056	0.190253	0.176248	1.9255	0.389192	0.15567	0.255689	0.613348	0.466257	0.597169	0.156412	7.48983	0.466801	0.532199	2.68411	0.727798	0.827125	0.291375	0.836453	0.8977
ENSG00000086570.12	FAT2	1450.64	61.775	40.5245	0.656001	0.0161092	45.7908	56.6534	46.9467	108.784	51.6235	36.849	60.1663	28.7997	57.5246	36.4909	140.568	48.581	99.4234	65.4138	41.5092	52.4627	42.1822	42.925	34.6483	39.0728	79.9362	35.0285	20.9116	49.7826	30.5311	29.0706	35.1821	33.7846
ENSG00000186994.11	KANK3	26.3423	0.753608	1.37217	1.8208	0.109331	0.535865	0.378138	0.961564	1.51409	0.651014	0.50406	0.225417	0.947786	0.589912	0.912744	0.425979	0.73481	0.332803	0.471956	0.617983	0.709702	0.889667	0.339464	2.69931	2.56434	2.93932	1.08513	2.36668	1.12374	0.868033	0.448485	0.390143	0.114194
ENSG00000148288.12	GBGT1	47.5336	1.36572	2.29598	1.68114	0.0361267	1.99746	0.766046	0.908535	2.24935	1.01014	1.14054	0.663068	2.71929	1.211	0.711893	0.819362	2.01954	0.91692	0.809013	1.04372	0.809147	1.1631	2.09484	1.1055	1.49072	5.35649	2.46553	3.43954	4.03797	1.44431	1.23564	3.26026	0.644662
ENSG00000258366.8	RTEL1	39.1811	1.21619	1.82603	1.50144	0.0192255	0.924345	0.594718	0.719077	2.11243	1.15722	0.908825	0.654158	1.45457	1.50641	0.912638	0.850816	0.854331	1.65468	0.931983	1.50658	1.16978	2.1515	1.35527	1.79141	3.91995	3.42653	1.40115	1.43563	1.19547	0.936559	1.56999	0.789267	1.29581
ENSG00000105323.16	HNRNPUL1	1348.54	52.9866	42.8112	0.807963	0.0428788	39.3084	55.4766	34.9336	40.8906	35.4549	40.3598	41.8014	44.8537	73.9088	67.7046	71.1809	75.0403	55.7057	53.1841	63.4953	47.8495	43.1454	41.9258	24.2242	58.7004	36.9909	47.1696	42.8149	43.4589	49.3648	39.2141	38.8421	41.5451
ENSG00000104812.14	GYS1	506.289	20.7418	15.2279	0.734163	0.0149672	19.0503	17.8368	18.5083	37.0949	16.96	14.0797	16.7143	12.0337	28.7189	17.2222	34.6334	20.0587	17.7983	21.0497	17.8676	14.8644	16.1321	14.4995	12.5047	27.7927	22.8894	13.1291	11.105	18.5184	8.81689	16.3235	9.16399	10.9224
ENSG00000162551.13	ALPL	67.4212	1.94722	3.15484	1.62018	0.0260947	1.68852	0.616301	1.12629	1.30697	2.36311	2.64155	2.74809	0.991203	1.15375	5.04552	2.43849	2.04926	0.650897	1.60548	1.28287	2.34746	3.14276	6.86623	5.49334	1.93224	0.93683	3.22967	3.81257	3.56763	1.86747	3.31367	2.15665	1.04639
ENSG00000140153.17	WDR20	201.95	6.6776	8.04506	1.20478	0.0373967	7.95609	4.09691	6.34769	5.13618	4.60011	7.79678	5.04132	7.77153	6.80342	9.23285	4.77218	7.26778	7.07792	6.35651	8.40671	4.74348	6.56442	6.96695	6.06476	9.70597	8.07287	7.95165	11.0522	7.95703	8.74155	9.37823	8.39525	7.69149
ENSG00000133246.11	PRAM1	24.4647	0.625255	1.37584	2.20044	0.0194497	0.744435	0.361155	0.312249	0.763213	0.483603	0.44439	0.344469	1.1881	0.392685	0.217938	0.535326	0.175452	0.462337	0.832172	0.621293	0.267979	1.37842	0.872897	5.15617	0.479186	1.43485	0.73157	1.769	2.38132	0.773779	0.584104	0.465777	0.29084
ENSG00000185324.21	CDK10	271.453	7.74491	12.16	1.57006	0.0222278	6.93521	6.20377	5.91328	14.0673	7.38838	6.87429	4.39015	9.89085	6.72647	8.21188	8.03281	5.67122	5.50805	8.377	10.483	11.3465	5.4408	7.36584	18.6485	29.1192	22.9534	6.89137	8.44087	7.84283	9.0959	7.81103	12.053	9.77027
ENSG00000105483.17	CARD8	160.077	4.84603	6.93739	1.43156	0.0200648	2.94244	2.64089	3.53294	4.78803	3.58387	5.21279	2.76073	9.89295	5.13496	3.21807	4.23106	7.75514	6.13913	3.61764	5.7398	4.20352	7.09887	7.84981	4.81265	5.98949	9.78142	9.04936	13.5761	8.55281	3.8336	5.09549	4.90033	4.14269
ENSG00000156384.14	SFR1	109.877	4.66129	3.28906	0.705613	0.0119245	2.51221	10.432	4.15771	5.25544	3.73027	3.46076	4.78399	5.69838	2.76559	4.52594	3.24622	3.64364	5.04074	4.39246	4.77391	2.32426	4.78404	3.88447	2.38756	1.87969	2.07288	2.5743	2.85732	1.88061	4.36163	3.63905	2.99858	5.81341
ENSG00000178449.8	COX14	239.002	9.46416	7.68001	0.811484	0.0406065	8.32169	8.17512	5.6041	8.87498	7.10702	8.18197	5.36072	9.12696	10.119	11.2098	11.039	11.4858	12.9713	9.48486	13.4	10.7248	7.35049	6.64726	6.10899	5.60167	8.31375	10.6188	7.75483	6.4693	5.81493	6.82816	8.65741	7.6498
ENSG00000196646.11	ZNF136	113.972	3.5558	4.87957	1.37228	0.0150082	3.45323	4.00819	0.866354	2.92561	4.02536	3.31365	1.70243	4.49339	2.30933	2.54471	1.85662	4.09726	3.48757	4.11275	8.64063	3.95817	4.95091	4.08264	6.37975	7.31242	5.27926	5.89202	5.38538	3.14071	3.83375	4.37571	4.03852	3.50521
ENSG00000117640.17	MTFR1L	99.8327	3.23713	4.15967	1.28499	0.0361047	1.836	3.95047	2.1031	3.04028	3.38167	3.73717	2.53476	3.7697	3.30235	2.63169	3.14441	2.42132	4.93489	2.31033	3.95884	3.64045	2.39414	2.4523	4.21446	6.40634	6.45705	4.60105	3.78275	4.0139	3.57539	2.67018	3.67598	4.89174
ENSG00000143919.14	CAMKMT	129.746	4.18509	5.36686	1.28238	0.0513447	4.34304	4.30297	2.42456	4.81004	5.49342	3.94561	2.88251	4.40089	2.81713	6.30162	3.33131	5.1283	3.1877	3.36737	4.53995	6.74776	2.99103	7.94811	6.99676	3.41368	5.23506	6.74449	5.60613	3.41536	5.21124	2.90054	5.22609	6.03295
ENSG00000168495.12	POLR3D	300.377	9.42582	12.4454	1.32035	0.0168358	9.73543	9.66628	8.03145	15.5709	8.7105	9.01537	7.76796	8.5371	11.7593	8.96445	6.66332	10.59	5.13545	12.5106	7.2292	10.1911	12.3849	11.775	25.5609	14.997	12.7606	12.6745	11.3035	8.90736	11.5648	11.4646	9.15249	7.75328
ENSG00000176533.12	GNG7	24.0838	0.636913	1.33308	2.09304	0.0234417	0.537414	0.433406	0.303079	0.530257	0.45599	0.76383	0.1421	1.49368	0.577531	0.269711	0.229666	0.530768	0.762892	0.228858	0.794516	0.897376	0.405048	0.987666	1.00602	0.614984	2.11026	3.16876	3.04061	1.96468	0.957596	0.321272	0.345855	0.20996
ENSG00000180353.10	HCLS1	365.183	10.3837	16.3252	1.57219	0.0438243	6.80663	4.82742	6.69052	10.5361	14.4627	9.68605	8.38305	21.9041	8.85553	17.1492	5.09442	18.7537	5.80722	2.33133	12.9681	10.6104	16.8813	14.7048	5.50858	20.5742	23.2772	26.0203	31.7683	20.3453	18.4581	9.20682	7.7432	5.82888
ENSG00000115165.9	CYTIP	237.827	6.60952	10.8834	1.64662	0.069096	5.82244	3.06347	6.06893	7.45199	6.54732	11.3418	4.67939	18.0105	6.91571	4.58536	3.10274	6.61254	3.39403	3.80623	6.24038	8.54814	13.7218	16.481	1.98867	3.03919	11.1625	19.2289	22.1158	13.1438	8.49396	10.0025	8.02732	4.23023
ENSG00000132623.15	ANKEF1	155.798	6.56302	4.62716	0.705035	0.0286677	4.63673	7.79743	5.527	6.13464	4.4707	3.64259	7.87161	4.46661	12.6063	3.17322	7.93995	4.80647	7.1244	6.39486	10.3528	6.96717	6.03629	4.2123	4.82462	1.516	2.94704	5.66781	1.78073	3.10371	7.11748	6.19896	4.34035	4.14058
ENSG00000164144.15	ARFIP1	206.963	6.76784	8.32656	1.23031	0.0540332	2.9939	5.55662	8.41906	8.71035	7.53099	4.83117	6.28155	6.35846	6.03489	6.49959	7.09699	5.56762	8.96581	6.84633	8.32431	8.97618	7.77291	8.59567	5.49701	4.50548	6.37889	7.82786	8.9661	6.62241	10.0848	10.2288	11.6191	9.87014
ENSG00000214654.8	B3GNT10	63.8322	1.97851	2.84265	1.43676	0.0163532	3.54895	1.62046	1.4285	2.52328	1.44658	3.54476	0.837197	1.31156	2.09389	1.6841	0.928753	2.27423	1.16688	2.2818	1.48676	2.85273	1.60975	3.43168	3.96007	3.10563	2.33261	2.49225	2.2048	1.60522	1.81859	2.15489	2.15955	5.92672
ENSG00000174130.12	TLR6	115.004	3.4861	5.03938	1.44556	0.0737127	4.49671	3.02984	2.67994	3.45644	5.74364	4.50271	1.85254	4.14504	4.06665	2.01571	1.12154	5.06885	1.96391	3.7619	2.88609	6.27088	4.49758	8.1486	1.21649	3.05426	3.50089	6.44953	9.03866	5.81382	3.13608	3.52066	3.19468	6.36983
ENSG00000204186.8	ZDBF2	157.875	7.2184	4.03072	0.558396	0.119689	5.39108	11.1637	1.05779	6.84304	1.28652	4.99332	7.09771	10.5941	4.53354	9.53227	8.57315	13.1093	4.2749	17.2543	1.07126	3.12571	3.63999	4.9195	0.925094	1.34034	2.12983	3.53195	5.20228	2.41733	6.93777	3.26314	8.80214	4.86436
ENSG00000107290.13	SETX	903.45	29.4922	35.6821	1.20988	0.0341687	38.2901	33.5737	29.1784	31.0904	24.5838	40.3137	19.1126	32.1449	30.377	35.6233	18.9562	39.2837	17.7793	27.5142	23.0615	29.9374	40.5258	43.9791	47.8825	40.3182	33.0667	36.9119	39.9673	29.858	37.6044	27.4597	31.4594	23.597
ENSG00000007129.17	CEACAM21	23.2741	0.594743	1.31946	2.21854	0.0049697	0.356582	0.251625	0.316729	0.153927	0.750087	1.13526	0.12375	1.51759	0.359834	0.417567	0.246163	0.784383	0.332187	0.199304	0.476156	0.845672	1.48332	0.955691	0.333755	0.306038	2.03199	2.06358	3.38938	1.86359	1.05896	0.746091	0.356969	0.417935
ENSG00000109686.17	SH3D19	542.039	17.5977	21.6057	1.22776	0.0253106	13.2845	26.5686	18.0668	11.4886	14.2741	13.3646	20.9272	14.2268	17.2227	18.8468	19.4072	15.4553	11.5032	21.0399	26.7891	25.9996	15.4808	21.3025	21.1233	19.6006	13.8942	21.638	19.5141	21.8101	31.615	23.5159	24.8652	19.2147
ENSG00000171954.12	CYP4F22	70.0794	3.81265	1.2069	0.316552	0.0722803	1.85412	4.62604	1.04565	7.7179	14.3882	2.95151	9.19231	0.805205	2.25981	5.9967	0.0914266	0.832358	0	2.91156	1.01687	0.381393	0.591227	0.49693	2.92543	0.0757765	1.95332	0.491672	0.279742	3.10275	1.57323	0.498786	1.65726	0.362189
ENSG00000108798.8	ABI3	137.823	3.7982	6.43464	1.69413	0.0507138	2.13862	4.62801	3.29264	4.12357	3.10498	3.68809	2.40802	9.18852	4.604	2.89395	1.90288	5.01801	2.96633	2.23129	3.28414	2.7292	9.11329	5.61718	2.72233	3.1815	11.8524	8.00189	13.1756	12.5388	5.41969	3.04281	2.78322	2.17238
ENSG00000229474.6	PATL2	71.966	2.11485	3.31102	1.5656	0.0182381	1.32109	0.284852	1.34729	2.97814	2.21592	3.35896	1.01884	4.28381	1.73713	4.35462	0.641781	2.76767	0.980013	1.34005	1.59259	2.26281	3.18711	3.32435	1.31896	2.60362	5.11725	4.79236	6.97626	2.88344	2.354	1.81207	2.64506	2.46597
ENSG00000180776.15	ZDHHC20	588.016	24.7697	16.867	0.680953	0.0193642	23.2437	25.2681	14.7311	10.7117	19.0136	24.8506	19.8976	22.3247	32.3885	16.9935	55.4385	36.9556	27.3888	18.0009	22.8382	10.2801	16.8267	19.716	10.2546	6.29024	8.59165	20.2492	21.1979	21.2162	25.6338	11.751	30.5012	15.4622
ENSG00000175970.10	UNC119B	207.647	8.22404	6.69892	0.814554	0.0404496	6.97631	8.91828	4.29738	8.00154	5.90503	10.1933	7.25157	11.0854	9.06504	6.81444	6.80913	7.24407	10.2352	9.34315	9.72073	7.4447	3.92545	5.32924	4.16388	8.02183	5.64856	8.65525	6.8696	5.75781	8.68755	5.41563	8.94071	6.92578
ENSG00000104731.13	KLHDC4	191.989	5.49635	8.64185	1.57229	0.0219602	5.43557	3.41561	3.5681	10.8056	3.07025	6.39601	3.45022	8.67623	5.00661	5.07503	6.35131	3.01258	4.28056	5.6034	6.79812	8.46488	3.56005	5.24788	11.9757	17.1009	19.8271	5.52808	7.47778	4.70874	8.0014	5.61115	6.53917	7.00115
ENSG00000089169.14	RPH3A	6.6776	0.241986	0.449832	1.85892	0.0338725	0.118196	0.0238302	0.0533261	0.276977	0.217291	0.376303	0.0468791	0.184788	0.0495683	0.210911	0.0466259	0.0636731	0.0524332	0.138418	0.270567	0.0286035	0.089084	0.0362036	0.404588	0.811537	0.49808	0.110622	0.196162	0.219094	0.340985	1.22946	0.253552	0.329839
ENSG00000153879.8	CEBPG	471.124	18.664	14.9204	0.799421	0.0233223	22.7039	17.8698	18.6465	14.2898	18.1526	23.3466	19.3216	10.208	17.3762	27.6094	21.8112	13.9699	14.3469	18.9312	19.8758	20.9112	11.6143	15.2762	16.7923	12.5363	10.165	14.6837	12.3245	11.3878	14.5695	11.6601	26.3841	14.3596
ENSG00000179934.6	CCR8	28.7658	0.821403	1.48037	1.80224	0.0789493	0.531356	1.78104	0.943938	0.458745	0.328745	0.740116	0.245872	1.6153	0.877422	0.829642	0.30568	0.834885	0.165001	0.0989966	1.06431	0.900119	3.18075	0.925672	0.596809	0.152013	0.178114	1.62454	2.66562	1.53214	0.946801	2.89062	1.72878	0.62278
ENSG00000040531.14	CTNS	103.647	3.37893	4.28946	1.26947	0.0290711	3.03997	1.92703	5.02412	3.78113	4.87096	3.69093	2.43188	3.97849	2.24996	2.97663	2.27646	2.52588	4.128	2.18871	4.09378	2.56613	3.07388	4.63997	3.8967	4.89385	6.49408	4.16329	5.76822	3.37997	4.89654	3.32048	4.22963	3.14029
ENSG00000178404.9	CEP295NL	85.0719	2.36593	4.02946	1.70312	0.0405816	3.80888	0.671943	1.654	3.01436	3.99038	1.21265	2.02684	3.39646	2.07323	0.644266	0.70118	5.66547	0.946215	2.31813	1.86492	1.76362	2.85971	2.55209	7.32025	4.57659	5.53264	1.63586	6.4363	8.42011	1.05574	4.46291	3.17751	1.28967
ENSG00000109065.11	NAT9	181.35	5.4686	7.85544	1.43646	0.0429081	4.32407	3.78363	5.17227	6.90638	6.46344	5.50667	3.44148	3.49657	5.8233	5.02984	4.47762	6.35931	7.68053	6.89607	5.1678	10.1378	6.42283	6.60581	13.9226	13.855	14.2627	5.25031	4.7038	4.76912	4.00654	7.02081	4.76164	5.10185
ENSG00000143258.15	USP21	215.533	6.99219	8.72692	1.24809	0.0487569	6.93071	4.72659	3.43383	6.46551	4.65057	6.81217	7.49022	9.6154	6.45199	6.60903	9.26939	7.89325	8.4643	6.30896	8.261	11.0157	4.776	6.55745	8.88157	13.2007	9.97892	8.85778	5.94422	6.63911	9.22762	6.8906	10.8031	9.37711
ENSG00000176170.13	SPHK1	143.279	4.00996	6.60996	1.64838	0.033197	5.51095	3.97278	5.22762	8.93384	6.86821	3.06097	2.31157	2.62746	3.62261	5.07611	0.93058	2.24262	0.812564	4.19561	3.25594	4.19093	5.58333	4.33541	10.7171	15.9702	5.79443	2.30309	4.27101	6.65919	6.68778	10.4856	2.0242	5.60723
ENSG00000179476.7	C14orf28	45.7487	1.52414	1.97589	1.2964	0.0261691	1.90306	1.27896	1.03747	1.0171	1.27833	0.937677	0.85963	1.70802	2.24465	1.09658	1.77253	1.93648	1.35076	0.641582	2.2992	2.10314	1.63661	2.21021	1.28928	1.39998	1.39735	2.57273	2.96698	1.33919	2.47596	1.36521	1.85977	1.77024
ENSG00000080823.22	MOK	81.4595	2.45904	3.64415	1.48194	0.0373252	1.4967	1.61794	1.59027	2.70806	2.11205	4.2835	1.34828	3.80449	2.37215	2.75952	0.879345	2.52178	3.64892	1.74429	2.49824	1.39717	3.01123	2.76528	1.84798	7.34288	2.75403	6.27277	3.31277	1.7102	5.27707	3.45142	3.12416	3.80702
ENSG00000081189.15	MEF2C	111.19	3.05306	5.24568	1.71817	0.0364654	2.02562	1.29276	3.01635	2.3789	2.82345	4.90789	2.3157	6.10345	3.60175	1.98833	2.33746	4.15625	2.26629	1.72046	3.3612	4.00667	4.36423	6.41094	1.51676	1.73849	5.2922	10.3889	13.8269	6.76413	3.07857	3.10392	3.8767	2.52543
ENSG00000151490.13	PTPRO	16.589	0.519257	0.892322	1.71846	0.016763	0.139711	0.394354	0.367694	0.361859	0.288127	0.203868	0.237043	1.11842	0.734835	0.290855	0.364361	0.848809	0.462767	0.242943	0.233202	0.631125	1.4364	0.63656	1.09845	0.266462	0.343436	0.376296	0.885323	0.67142	0.248946	0.623625	2.35436	0.727778
ENSG00000115970.18	THADA	234.27	7.43808	9.65374	1.29788	0.0292697	6.98111	6.66394	4.40367	8.20624	8.45242	7.33025	4.99079	14.2006	6.04064	6.06521	5.36049	7.47514	8.55664	7.2304	8.11369	7.8715	5.86626	10.6982	14.4375	8.83413	14.8909	10.4325	10.2467	6.83416	7.26909	5.49238	11.5122	9.81294
ENSG00000184988.8	TMEM106A	239.106	7.24635	10.247	1.41409	0.0347022	5.72674	5.66448	6.53107	9.25448	6.68643	8.18121	3.8503	13.6594	6.87909	5.76998	5.2712	11.5667	5.28936	5.54448	7.32032	4.21211	14.3222	8.31705	5.13108	7.56155	12.8632	8.14505	20.6776	11.0438	7.09355	13.1908	10.6329	8.71996
ENSG00000042286.14	AIFM2	83.7938	2.73611	3.50402	1.28066	0.0213964	4.26197	1.9248	1.58828	3.00252	2.2276	2.5781	2.63476	3.48263	1.58897	4.23226	2.03993	2.31433	2.35047	2.9475	2.36752	6.07618	2.15863	3.61871	3.19131	3.47253	4.25163	2.94858	2.41265	2.77736	3.44272	3.28164	2.73062	3.88966
ENSG00000124343.13	XG	99.2213	4.67199	2.45704	0.525908	0.039184	3.24129	11.0304	3.63232	3.38511	5.35623	4.32748	4.9833	1.46211	1.57308	2.93855	9.4075	10.6456	4.12346	0.623362	1.84996	0.850181	0.360684	3.25066	1.52668	0.837546	3.36464	3.05969	2.76067	4.40925	2.48409	5.11922	0.575691	2.04246
ENSG00000168610.14	STAT3	992.844	39.8501	30.6071	0.768057	0.0611241	40.4524	65.0968	37.7039	30.9106	34.8615	50.1937	52.3122	58.6117	39.3778	35.1636	53.6755	21.4032	31.0339	18.9231	26.5312	27.5048	28.0203	32.3977	15.9782	38.9702	32.9274	36.4731	30.8253	38.055	35.8278	22.7481	28.2837	28.581
ENSG00000115325.13	DOK1	43.8971	1.34038	2.04549	1.52606	0.0310721	1.32072	0.931978	1.13344	1.09067	0.994752	1.0512	0.531419	3.77055	1.51714	1.07589	0.687114	1.51577	0.713256	1.19822	1.0735	1.16729	1.95756	1.50823	2.27886	1.31422	2.84877	1.35433	3.8207	2.85618	0.409277	2.3549	2.2994	1.12171
ENSG00000157110.15	RBPMS	107.402	3.23476	4.74466	1.46677	0.0159364	2.43087	3.26473	2.2211	2.75876	3.72594	2.99584	1.92309	3.76639	2.79834	4.57601	2.44502	5.76617	1.58276	3.38941	3.37692	2.5106	3.11874	5.00191	2.77435	4.80076	3.49595	4.47806	11.5737	6.72669	3.9123	4.29867	4.5334	3.15548
ENSG00000107099.15	DOCK8	171.297	4.75703	7.90321	1.66137	0.0340879	2.70549	4.16786	4.60314	6.13004	4.56421	5.30763	3.5206	13.7925	5.3974	2.8955	2.22137	4.47048	3.53407	1.44828	5.09683	4.96611	11.7428	8.51067	3.22421	3.06692	12.0579	12.0274	16.0307	12.6448	4.66236	5.77242	3.42049	3.3149
ENSG00000204052.4	LRRC73	11.1671	0.611864	0.368395	0.602086	0.0576259	0.24764	1.165	0.130348	0.855199	0.367711	0.197105	0.229179	0.65244	0.0605816	0.644429	0.189951	0.933843	0.410131	0.492136	1.10228	0.447471	0.201004	0.265485	0.06181	0.56677	0.110681	0.432642	0.348721	0.11901	0.392231	0.138173	0.0826364	0.322499
ENSG00000186832.8	KRT16	9235.86	488.068	147.511	0.302234	0.113878	452.312	93.9962	2016.38	1013.63	848.855	340.529	617.383	38.2783	714.502	162.75	787.216	27.0315	45.6032	86.616	74.4358	146.893	100.625	122.212	356.907	81.6793	175.852	123.124	48.4874	226.107	236.3	225.216	42.7026	30.2351
ENSG00000106952.7	TNFSF8	27.7955	0.799455	1.43105	1.79003	0.0618799	0.481987	0.80778	0.642177	0.676199	0.745502	0.575443	0.390299	1.86815	0.840116	0.18814	0.720926	1.06024	0.636101	0.134698	0.724065	1.06143	1.41816	0.936551	0.225566	0.206834	1.13096	1.86832	3.94508	2.51899	1.43139	0.806785	0.48251	1.27106
ENSG00000106034.17	CPED1	50.0492	1.39663	2.45383	1.75697	0.0180571	0.545355	1.45916	0.959837	0.588539	1.21466	0.795787	0.672934	4.57292	1.59262	0.567667	1.52684	2.11364	0.705619	0.677366	1.45646	0.993122	2.61902	2.48477	0.629547	3.71843	1.18824	4.19813	5.3037	1.81821	1.26867	1.33125	3.82163	1.22511
ENSG00000042429.11	MED17	36.8059	1.27213	1.57876	1.24104	0.0266989	0.906504	0.714064	1.61038	0.82813	1.10082	1.27524	0.98525	1.58294	0.742648	0.946334	0.960524	1.21896	1.34201	1.59464	1.7735	0.964227	1.00101	1.43514	1.65748	1.24241	1.45573	1.55609	2.46027	1.26134	1.35231	1.85261	1.59338	1.39192
ENSG00000125730.16	C3	525.267	14.4262	23.975	1.66191	0.0248012	6.09675	8.60444	10.341	22.1072	23.6309	13.0853	8.17153	27.6729	16.8717	5.00582	15.5291	32.2925	18.423	2.42844	4.63206	13.9106	11.2452	17.4558	9.11459	32.0931	30.9228	30.6778	49.0472	48.7231	15.4337	22.9089	14.3534	14.4886
ENSG00000136869.14	TLR4	56.7987	1.51643	2.83479	1.86939	0.0412327	0.738742	0.958818	1.32798	1.01363	1.76292	1.43847	1.63592	3.06383	1.93147	0.720904	1.12318	1.75769	1.36002	0.75699	1.65586	1.09947	4.89331	3.4366	1.10632	0.694412	0.795956	3.07099	8.69376	3.87988	1.42603	2.46208	1.66397	2.32954
ENSG00000182372.9	CLN8	83.8377	2.69474	3.55513	1.31929	0.0219666	4.01657	1.60655	2.29441	2.74859	2.63847	1.84154	2.20117	2.66711	2.43158	3.03452	2.44483	2.02416	2.18414	4.53823	2.24919	3.40518	2.86202	2.81775	6.88828	3.87616	3.79716	2.87801	3.59693	3.85609	2.08882	4.2756	2.26061	2.31405
ENSG00000151413.16	NUBPL	78.0206	2.36436	3.48886	1.4756	0.030336	2.19141	1.6766	1.27489	1.95169	1.15314	2.53369	1.473	3.98304	2.26006	2.62922	1.1784	3.94338	2.4068	1.89098	3.4191	2.34458	1.66637	7.10976	2.84998	2.93006	2.1032	2.79078	3.62998	1.57971	2.30176	3.89981	4.75705	6.09219
ENSG00000110315.6	RNF141	212.7	8.62659	6.6232	0.767767	0.0223314	9.17948	11.3121	11.437	6.30141	6.64888	9.7476	12.3076	6.16637	10.8612	6.37973	5.64659	8.52722	8.78786	5.37261	9.22315	6.31864	7.45984	6.57662	3.4535	4.94477	5.13337	6.83531	4.46904	12.3789	8.88306	4.19734	8.92048	5.23074
ENSG00000000971.15	CFH	390.632	10.6123	18.0191	1.69795	0.0271562	2.83742	7.78147	15.3594	10.2998	10.4159	8.58874	8.22582	11.8929	22.9853	3.77579	17.6983	21.4266	3.05715	5.3024	8.03707	11.5941	32.112	17.6752	10.1564	7.01051	7.7819	38.1643	35.983	21.6471	11.9247	19.6276	9.2101	10.0608
ENSG00000110328.5	GALNT18	296.792	12.665	8.432	0.66577	0.0339523	16.4607	13.966	18.961	18.7122	15.0521	16.5211	8.80063	6.33934	8.83902	8.06459	24.2154	11.1646	4.73677	11.2599	5.38232	8.7006	8.69818	12.3424	7.62666	19.168	6.66658	3.62634	5.50599	9.91726	9.57617	7.23167	4.88074	4.37531
ENSG00000184730.10	APOBR	161.952	4.77729	7.16096	1.49896	0.0619919	3.37051	5.24557	3.9006	6.1786	4.73049	5.65939	5.7471	7.94431	5.91301	3.28012	3.33614	3.3081	4.07186	2.20215	5.27143	2.59672	12.2172	5.81606	3.66469	4.75521	13.434	7.11859	10.7279	12.6144	4.27808	6.64651	3.8826	4.04062
ENSG00000184271.17	POU6F1	38.2113	1.19205	1.77928	1.49263	0.0300464	1.44743	0.551553	0.777112	1.42459	0.716411	1.0599	0.442046	2.42888	1.64654	1.06219	0.71944	1.74663	0.323619	0.604063	1.43028	1.11809	0.869387	1.73794	1.43064	1.15945	2.98877	2.27588	2.96565	2.58764	0.82532	0.847988	2.02861	0.995267
ENSG00000132341.11	RAN	1010.8	39.739	32.1166	0.808189	0.0321773	35.9235	31.0342	48.4322	31.2024	43.9302	43.2067	46.6276	25.5696	51.2643	45.2118	43.8541	36.8085	35.8772	33.0994	42.543	38.4306	42.6623	27.328	22.1985	25.5372	11.6769	28.1471	22.3424	29.4011	34.1821	40.8165	47.9863	45.5068
ENSG00000154639.18	CXADR	422.924	18.8471	11.0013	0.583713	0.0600007	2.14856	25.035	4.99605	9.88557	12.4889	26.9238	17.847	18.2883	18.6529	30.6832	32.3539	10.9017	41.138	13.122	16.742	3.14255	8.19863	15.2669	8.78964	4.4976	4.77799	12.5542	9.32573	11.2762	29.0712	2.08329	17.7055	15.0276
ENSG00000151470.12	C4orf33	41.2503	1.38047	1.79564	1.30074	0.0662297	0.27454	0.827762	1.52718	1.68071	1.61826	0.834331	1.60528	1.42639	1.41956	0.993707	1.24053	1.6941	1.17804	0.836991	2.04964	1.63198	1.81309	1.64553	1.00917	0.714016	1.0374	2.39819	1.73971	1.42133	2.2829	2.25595	1.94885	2.14518
ENSG00000101577.9	LPIN2	194.669	8.35424	5.55038	0.664379	0.0198666	5.56142	12.591	9.41214	6.11294	6.90708	6.29139	8.85207	9.89342	5.64049	11.8191	7.56005	5.11352	4.0776	4.29808	19.6833	3.23631	7.71153	6.91445	3.56666	3.44725	5.90337	4.98176	9.21829	8.66767	2.90561	4.87004	5.85098	3.58105
ENSG00000117091.9	CD48	87.1751	2.36674	4.19031	1.77049	0.0592671	1.60429	2.94341	3.03998	1.89292	2.1704	2.59638	1.58368	7.21793	3.08086	0.834963	1.10751	2.28545	1.22884	0.557937	1.85663	2.3372	9.02834	5.93363	0.560594	1.2239	3.37002	5.88586	7.45512	7.2858	1.90575	2.19306	2.94439	3.0503
ENSG00000168301.12	KCTD6	58.4565	1.89582	2.52455	1.33164	0.0186381	1.82615	1.24836	1.23906	1.92148	1.83596	1.04469	1.18829	1.8736	1.36116	2.13846	1.12934	2.29544	4.00494	1.65861	2.1718	1.37274	2.03808	2.66129	1.96563	1.89382	3.44326	1.84444	3.79703	3.29101	3.11835	1.91046	2.39942	1.78362
ENSG00000168081.8	PNOC	16.6546	0.501657	0.917671	1.82928	0.0214005	0.0823527	0.232451	0.292594	0.639891	0.489128	1.63868	0.266747	0.851185	0.271976	0.0642914	0	0	0.35802	0.122745	0.714794	1.42296	0.434483	1.0153	0.0616646	0.471197	0.993785	2.01425	1.47858	0.593651	0.978272	0.413544	0.494652	0.257392
ENSG00000167077.12	MEI1	29.1483	0.80629	1.52723	1.89414	0.034912	0.876545	0.297816	0.358851	1.12113	0.530259	1.70542	0.360534	1.38167	0.929213	0.380169	0.283881	0.489692	0.302436	0.362908	1.21383	1.42988	0.922276	1.13113	0.364637	0.965915	2.87294	4.04113	3.05154	0.912701	1.34977	0.543417	0.714997	0.25367
ENSG00000144524.17	COPS7B	186.903	6.11585	7.53576	1.23217	0.0168103	4.44487	6.8434	3.99937	5.63161	4.95714	5.92699	3.39232	6.94914	4.24711	4.10096	5.36651	10.8841	8.12024	9.03405	6.34007	8.6933	6.39563	7.65829	7.84519	6.87	9.36539	7.57635	7.80363	5.30557	6.41154	6.78793	7.94588	8.00617
ENSG00000146066.2	HIGD2A	470.503	15.1446	18.9334	1.25017	0.0419904	14.1533	24.2287	12.5197	15.6135	11.5456	19.1924	9.82366	14.8199	13.4649	16.3693	13.3893	9.55418	17.5801	15.0401	18.3744	22.8214	27.7624	20.7929	20.4106	11.9972	23.1943	13.1646	17.7159	20.972	13.0766	12.7229	15.2182	24.9852
ENSG00000130755.12	GMFG	124.125	3.53544	5.68408	1.60774	0.0176275	1.76257	2.07295	3.43267	2.84052	4.82721	4.58276	3.80607	11.1449	4.13939	2.38508	2.05499	2.06782	1.75145	1.83895	2.82434	3.14504	8.72686	6.80247	2.72756	1.88251	7.56255	7.80091	8.93523	9.91046	3.76878	4.32713	3.88186	3.1217
ENSG00000139645.9	ANKRD52	373.925	14.3633	12.4058	0.863711	0.0247399	14.0939	18.28	13.3141	11.8937	16.1819	16.0841	11.647	12.6603	14.8015	15.9309	12.2967	17.5162	11.6996	13.0773	14.4729	11.5878	10.7066	8.92735	9.64663	18.1726	15.1179	12.3027	12.9353	11.1471	12.875	11.4634	14.8246	10.2681
ENSG00000064270.12	ATP2C2	216.247	9.95122	5.36756	0.539387	0.0635108	8.64454	12.2674	10.8301	21.0122	18.9062	4.09416	17.2564	2.04151	10.7661	5.5774	4.01133	5.62761	2.60304	2.99928	21.131	2.6948	0.550887	12.1907	2.08631	7.38516	6.7693	6.76076	3.999	3.34752	6.90251	5.08239	7.84336	2.86559
ENSG00000136021.18	SCYL2	446.211	18.0391	13.725	0.760849	0.0232195	16.9441	21.6675	15.3645	12.3455	13.2864	18.4786	15.6377	11.9525	18.2323	22.5826	30.2555	20.2984	14.3024	12.6274	25.1106	15.7948	12.1195	13.3478	7.0798	9.8824	6.08773	17.6429	15.7943	12.2819	16.9031	10.6946	25.3969	14.0992
ENSG00000092529.23	CAPN3	33.6054	1.06426	1.57242	1.47748	0.0415794	0.420617	0.469952	1.20384	1.90648	1.14502	0.94855	0.535234	1.42783	1.13187	0.766194	0.645264	0.749006	1.50206	1.09711	0.514859	0.653149	1.94885	1.20247	1.07609	2.28631	1.22194	1.89834	1.73989	1.61711	3.24775	0.792066	0.526342	0.931198
ENSG00000186265.9	BTLA	22.5852	0.582412	1.2807	2.19895	0.0101469	0.142073	0.868879	0.299128	0.531521	0.421917	0.753872	0.219137	1.98673	0.521342	0.2588	0.196158	0.297641	0.411767	0.105878	0.221335	0.62575	0.768783	1.24387	0.141844	0.270967	1.26997	2.21321	3.4011	1.43382	0.731336	0.317084	2.22823	0.703077
ENSG00000115232.13	ITGA4	169.933	4.65061	7.92103	1.70322	0.0288987	2.50402	3.56523	4.87259	3.59669	3.83875	4.7621	2.29684	14.564	7.61106	3.13121	3.03911	4.17812	4.12869	2.42757	3.74317	4.30938	11.4932	9.33619	2.58846	2.28221	7.81424	12.9014	17.4589	13.0188	3.57997	4.76633	6.56631	5.55804
ENSG00000122224.17	LY9	21.9547	0.566285	1.2508	2.20878	0.0136035	0.691264	0.230348	0.280471	0.2984	0.370655	0.641899	0.159933	1.96132	0.620061	0.149905	0.053023	0.410319	0.238508	0.157409	0.730762	0.865242	0.709145	1.86298	0.0718902	0.417494	2.34291	2.61663	1.94684	1.97939	0.821156	0.449978	0.576678	0.300075
ENSG00000081320.10	STK17B	555.403	16.7533	23.608	1.40915	0.0890835	17.4816	20.3723	19.4327	11.0266	15.5403	17.4933	12.4477	29.799	20.9437	18.903	10.0048	17.2248	12.5922	10.8863	15.6513	16.398	34.7175	26.3148	8.32817	9.34778	17.9812	38.2928	36.9819	24.9927	23.548	37.7465	14.384	16.5703
ENSG00000137275.13	RIPK1	445.437	14.5223	17.7233	1.22042	0.0477146	9.6417	14.6003	14.9964	16.5768	17.102	8.99159	16.5821	16.9321	12.3604	13.6974	14.1501	12.6397	18.324	12.0578	17.6823	12.744	18.2045	19.7857	14.6871	21.5932	26.7989	25.0862	16.1703	17.0627	16.5657	13.7839	10.3564	16.2639
ENSG00000189056.13	RELN	19.4299	0.405891	1.24166	3.05909	0.0203503	0.263135	0.24432	0.546727	0.669574	0.58265	0.231484	0.256336	0.42943	0.0965582	0.129742	0.0956067	0.191491	0.0946128	0.340592	0.4161	0.473905	0.573294	0.378602	0.394064	0.396205	7.2792	2.00217	1.27251	1.08819	0.411289	0.243409	0.166371	0.162321
ENSG00000131849.11	ZNF132	18.7374	0.539706	1.03399	1.91583	0.00272741	0.397123	0.105087	0.293949	0.299999	0.491393	0.355594	0.183759	1.96176	0.491824	0.193767	0.365534	0.24959	0.154148	0.554909	0.497149	0.420455	0.805838	0.638609	0.743402	0.568055	0.998387	0.997333	3.14561	1.32401	0.471745	1.12174	0.596331	0.310301
ENSG00000164074.15	ABHD18	125.717	4.09155	5.16487	1.26232	0.0311317	4.30721	3.26047	2.9576	3.67355	4.05701	5.15277	2.70573	5.06291	2.93119	3.50523	4.08473	3.11722	4.63672	4.33823	6.08272	4.06832	3.84567	5.03736	4.12433	3.07684	5.67022	5.87174	5.56907	3.68826	6.63603	4.56616	9.1203	4.56897
ENSG00000122122.9	SASH3	149.719	3.95061	7.17383	1.81588	0.0417988	2.06662	4.37499	4.20669	4.29327	3.22847	3.80381	2.15163	12.6434	4.24204	2.82341	1.66445	4.14012	3.20873	1.20322	3.70826	4.39797	10.615	6.612	1.88597	2.14321	11.8633	9.81607	14.1871	16.2942	4.21945	4.16193	3.03865	2.72498
ENSG00000002933.8	TMEM176A	51.0823	1.36975	2.56431	1.87211	0.0347503	0.553578	1.74011	1.31122	1.08621	1.22052	1.00139	0.768466	2.84555	2.03137	0.825051	0.717993	2.59359	0.656353	0.787591	0.907215	1.27877	5.22852	1.80738	0.791342	1.26696	0.944684	3.45091	6.69693	4.75238	1.07607	2.61138	1.10836	1.02239
ENSG00000139372.14	TDG	306.466	11.9522	9.99865	0.836551	0.0338804	12.2839	7.60992	12.6308	9.3413	10.7106	12.6478	14.0285	8.8363	10.3518	13.8273	14.7416	10.9522	15.7238	10.2455	13.8521	11.6627	7.8837	8.32638	7.78091	9.19425	6.6074	10.7148	10.7861	8.59763	11.3259	8.21872	14.4421	13.1419
ENSG00000105808.17	RASA4	17.9052	0.631946	0.863539	1.36648	0.0322319	0.671974	0.443591	0.273833	0.823435	0.418426	0.862654	0.551668	0.421733	0.373851	0.524599	0.538712	1.00815	0.255786	0.420009	0.390764	0.367202	0.351887	0.673918	0.795326	1.01702	0.523161	0.710067	1.53385	1.01568	0.617994	0.598683	1.12841	0.592812
ENSG00000107159.12	CA9	101.819	5.90311	1.23634	0.209438	0.00101901	3.25002	6.95419	3.14546	8.59872	8.76949	10.2637	3.92947	0.828638	8.84836	2.2917	1.8335	0.658909	0.846447	26.408	0.419987	0	0.553121	6.06927	0.235507	1.91955	0	0.22895	1.55014	1.43592	0.622697	1.49165	0.419813	0.245756
ENSG00000168273.7	SMIM4	65.9438	2.14493	2.81307	1.3115	0.0514969	2.18676	1.59288	1.36452	2.07064	1.78063	1.96509	1.40356	2.8735	2.66616	1.92745	3.11661	1.77337	1.57715	1.31424	3.06135	2.50942	2.43338	3.59212	1.95434	2.17951	2.45915	2.27991	2.68201	2.18656	4.52496	1.00365	4.37826	3.08663
ENSG00000169744.12	LDB2	86.5821	2.43093	4.07062	1.67451	0.0222391	0.940289	0.552935	2.52415	1.38005	2.83893	2.17038	2.30601	4.45916	3.23189	1.93305	2.42338	3.11242	1.36261	2.96646	2.76232	2.21938	2.87475	4.85541	2.41733	2.94109	1.84912	5.99599	11.5858	5.76147	2.38288	2.51828	4.11038	2.10618
ENSG00000115998.7	C2orf42	128.479	4.33085	5.10126	1.17789	0.0435946	5.01612	3.74387	2.64664	3.12307	4.29705	4.33799	4.10654	5.27842	4.90258	4.85735	3.6848	5.57767	3.7743	3.4147	4.70162	3.9055	3.22976	5.79122	7.00639	4.52588	5.30298	6.23552	5.55238	3.92886	4.87007	4.92478	5.06984	4.67319
ENSG00000184470.20	TXNRD2	57.4591	1.71455	2.65699	1.54967	0.0175935	2.15376	0.870575	1.53539	1.49839	1.01426	1.43131	1.49974	2.39009	1.13562	2.23643	0.654396	0.893654	1.50643	2.36864	3.02956	1.64359	1.25595	1.56919	3.16279	6.91533	3.05604	1.72611	3.00343	1.88418	2.08651	3.36011	1.48624	2.09135
ENSG00000078900.14	TP73	134.041	6.13694	3.44514	0.561377	0.0708385	2.56293	11.7647	2.47322	7.06276	3.56213	4.67739	5.52238	11.9937	4.05639	4.56757	0.452748	5.49945	12.7499	3.37625	10.2325	1.7805	3.90838	2.65047	1.04678	2.25149	9.47625	3.10943	3.77311	2.37006	5.0742	0.931671	4.95001	2.16443
ENSG00000137962.12	ARHGAP29	94.0273	2.73282	4.295	1.57164	0.0485451	1.26315	1.38478	2.94741	3.44688	4.03589	2.66606	1.8161	3.36679	2.15204	2.96717	1.6402	3.70006	1.82814	1.49607	4.78157	1.71183	5.96853	4.28619	2.22946	2.18112	1.75415	4.44315	5.8484	4.3089	1.94262	6.58848	3.01453	10.2577
ENSG00000102032.12	RENBP	55.9711	1.57436	2.70428	1.7177	0.0396021	2.38322	0.720746	1.00803	2.20452	1.55873	1.96463	0.984624	2.58746	1.65536	0.797376	0.822617	1.49784	0.792921	1.20519	1.93217	1.06697	3.03978	1.41435	1.97573	7.20764	3.99436	2.56509	5.30368	1.47255	1.92107	1.7809	1.44853	0.665066
ENSG00000241978.9	AKAP2	11.0539	0.394408	0.610601	1.54815	0.0244968	0.200424	0.0785728	0.263739	0.538334	0.330668	0.407673	0.164874	0.785296	0.35956	0.382477	0.133236	0.279923	0.152136	0.116172	0.223028	0.354609	1.22913	0.3223	0.383525	0.254837	0.776343	0.612767	1.03485	0.561862	0.185177	0.428675	0.267522	0.226209
ENSG00000176454.13	LPCAT4	270.227	7.64533	12.1805	1.5932	0.0172782	10.6165	6.3074	5.57374	9.44925	5.32691	6.47547	7.51232	7.29765	4.73919	14.2978	6.61543	5.09031	3.44402	6.52524	13.9087	7.55224	9.57958	5.90589	17.2103	32.7311	14.6263	10.0865	7.97589	10.4145	10.9646	7.72508	16.5447	5.72986
ENSG00000092094.10	OSGEP	186.316	5.7965	7.85913	1.35584	0.0526997	6.01333	2.69809	3.95191	4.2313	3.19997	7.27614	4.51959	7.96723	5.80351	7.97795	4.76713	4.54395	9.34736	5.49161	7.65848	3.90977	3.49843	11.6822	8.615	9.50653	7.36374	6.52806	13.2157	6.58989	6.02843	4.77095	8.59482	10.5652
ENSG00000147586.9	MRPS28	77.7897	2.52516	3.28556	1.30113	0.0285829	1.54172	1.42791	1.94	2.24613	2.24154	2.6076	2.63064	4.5696	2.15688	3.23467	1.50778	1.45344	2.75281	2.65695	3.40974	1.89347	2.50275	3.40893	3.31896	4.07984	3.35917	2.23053	4.88479	2.22274	2.28928	3.3871	4.82311	3.01165
ENSG00000143365.17	RORC	19.4627	0.421647	1.226	2.90764	0.00306348	0.0554583	0.450048	0.0766266	0.359098	0.439187	0.286917	0.115479	1.04526	0.295083	0.173181	0.0510468	0.557683	0.413313	0.0619944	0.444332	0.68581	0.303845	0.53509	0.477554	0.475973	1.00386	0.956776	0.819998	0.959469	2.37165	0.116038	0.471907	5.46003
ENSG00000198729.4	PPP1R14C	872.971	37.1404	24.5127	0.660001	0.257583	48.9773	33.2408	50.0393	46.7798	64.1472	35.0973	40.6204	47.783	12.9568	29.6613	4.38083	6.74953	63.7156	48.2621	23.1946	21.3346	31.5322	32.5331	33.3839	6.14466	17.0175	16.1325	20.2782	25.7464	32.5695	31.6624	13.1128	35.9174
ENSG00000110934.10	BIN2	170.485	4.57781	8.04751	1.75794	0.0192733	2.92531	2.34156	4.17116	4.03335	4.81909	5.80349	3.47495	15.6089	5.04682	4.63565	1.96922	3.18314	2.65739	1.3666	5.13061	4.48212	10.4899	8.77639	2.71352	4.19692	13.933	11.0795	18.9982	11.3621	4.09737	5.9563	4.19603	3.0363
ENSG00000105072.8	C19orf44	76.2934	2.32983	3.39585	1.45755	0.0172741	2.21773	2.571	1.29761	2.29077	0.980063	2.04885	0.971226	3.49129	3.16801	1.39126	1.38518	5.57531	1.69708	1.77079	2.59123	3.28724	2.37867	3.50262	4.71494	5.80077	5.89407	2.43886	3.26237	2.16964	2.06993	3.24817	1.6651	2.41364
ENSG00000172819.16	RARG	550.95	22.4376	16.7067	0.744584	0.0176824	18.9868	31.4472	21.6505	27.3892	23.1221	18.3195	18.4879	15.281	19.2352	28.1258	16.0935	32.7087	24.0928	15.0659	25.0574	21.1494	6.70772	12.6852	18.0271	11.9188	30.1742	20.9855	11.2165	30.0571	23.0414	5.94475	14.4265	9.55253
ENSG00000162706.12	CADM3	17.8737	0.328679	1.21104	3.68456	0.00093731	0.136534	0.160577	0.359331	0.0785841	1.10377	0.289791	0	0.332045	0.167005	0.0355299	0.083782	0.171621	0.11306	0.0339167	0.364636	0.339223	1.0528	0.243953	0.170391	0.677044	0.91534	1.05352	3.17235	1.01703	0.919072	4.53271	0.136682	0.213367
ENSG00000197647.11	ZNF433	60.4604	1.63932	2.97466	1.81457	0.0451505	3.35493	2.68844	0.202032	1.96371	0.759903	1.35778	0.236809	2.10891	0.333858	0.266353	0.628079	1.92986	2.01297	1.52556	3.72064	0.558694	0.900012	1.95074	6.42934	6.37694	5.4133	3.37767	2.4022	2.91033	2.29664	2.14159	0.569249	2.04384
ENSG00000103342.12	GSPT1	886.142	34.377	28.7144	0.83528	0.0342921	27.3606	33.8223	38.9032	27.2036	32.564	28.9725	39.9315	25.145	43.4775	36.5148	43.7356	33.7058	33.7545	25.6464	43.417	30.2212	35.9971	32.8904	22.6783	22.1893	15.8689	39.713	22.5083	25.028	30.4008	35.1436	35.4784	23.8699
ENSG00000166261.10	ZNF202	164.938	5.15888	6.9504	1.34727	0.0361116	3.67788	4.23989	3.60824	5.2188	4.88438	5.01416	3.52165	8.4574	4.79713	4.17897	3.4356	7.18633	4.56835	6.67585	6.4186	5.4531	9.62077	6.63657	13.4153	10.001	6.20087	7.44336	5.53806	5.35501	3.07126	6.46107	5.2494	4.60945
ENSG00000099331.13	MYO9B	802.587	24.2606	33.9598	1.39979	0.0506997	25.2028	20.0945	21.184	30.7844	31.9433	20.1858	15.3348	29.9934	25.9235	24.8415	24.2428	22.1668	12.0016	25.0908	33.4191	21.7463	38.2273	24.3018	38.995	57.5401	71.4079	27.0426	38.0674	36.0437	22.5166	30.5938	16.3679	17.3274
ENSG00000187862.11	TTC24	11.3818	0.350182	0.686848	1.96141	0.0849678	0	0.436719	0.244317	0.480879	0.275685	0.344812	0.0572746	0.526785	0.227101	0.0966302	0	0.466756	0.384362	0.0461214	0.165283	0.18871	0.828847	0.563956	0.0463411	0.0708211	1.74261	1.00013	0.91507	1.47223	0.220552	0.310779	0.123911	0.145073
ENSG00000174804.3	FZD4	59.7733	1.74669	2.79793	1.60185	0.00909225	1.28057	0.93711	1.6851	1.28984	2.03057	1.11362	1.52527	3.30172	1.78391	1.24039	2.47745	2.1164	1.25187	1.43149	1.23499	1.83987	2.01144	1.75418	1.22522	2.4152	1.90779	3.54227	8.03955	2.64968	1.83106	2.06411	3.51351	2.27914
ENSG00000147400.8	CETN2	321.731	13.0128	9.94918	0.764571	0.0317585	8.80857	14.9949	17.9246	11.5249	10.5175	12.2151	14.0768	9.27557	17.1947	8.57816	19.0995	18.8343	7.95216	10.0836	12.6112	9.26072	15.4419	8.12903	9.72363	7.06639	4.87042	13.2473	4.69947	9.03371	11.111	9.95629	9.81813	15.6814
ENSG00000168995.13	SIGLEC7	16.2923	0.534783	0.85158	1.59239	0.0433722	0.171397	0.120947	0.642794	0.443925	0.381749	0.477471	0.158619	0.833662	0.440262	0.535227	0.59161	0.754052	0.212895	0.127731	0.629398	0.232277	1.73898	0.872799	0.320849	0.588408	0.919252	0.48659	1.26712	1.6062	0.305405	0.430344	0.600539	0.401774
ENSG00000121897.14	LIAS	47.6405	1.5095	2.1383	1.41656	0.0266372	1.11897	1.24232	0.783348	1.23656	0.863987	1.46063	1.37384	1.48764	1.54937	1.37441	1.13296	1.96915	2.23309	1.52326	1.79304	1.91071	1.24126	2.64712	1.39645	1.36585	1.22028	1.3554	2.15872	1.43042	1.77231	1.78561	4.70478	3.50899
ENSG00000108001.13	EBF3	36.3859	1.14297	1.69548	1.4834	0.012527	0.60595	3.1535	1.10635	0.326966	1.23716	1.05502	0.560778	1.15129	1.11178	0.886979	0.418312	1.76137	0.564495	1.0725	0.632145	0.87251	3.04323	1.72554	1.36118	1.73353	1.72651	1.98493	2.11988	1.88373	0.854777	1.61651	0.871999	0.946945
ENSG00000007264.14	MATK	20.6927	0.537545	1.18689	2.20798	0.0369309	0.12684	0.0298353	0.233673	1.09507	0.397606	0.269217	1.40861	0.56553	0.558533	0.264059	0.252959	0.531455	0.15755	0.220561	0.451664	0.200543	0.909419	0.589247	4.36891	0.290297	2.04085	0.498593	1.47356	0.914345	0.200899	0.389243	1.98932	0.264292
ENSG00000068305.17	MEF2A	501.145	15.6987	20.6512	1.31547	0.033963	16.0797	13.8088	14.7317	15.1266	16.8809	13.7039	17.3027	16.4015	14.2688	18.6126	15.7082	21.7692	14.2574	8.6671	16.6609	19.9325	22.9222	16.4252	21.203	12.4407	17.3904	22.4936	29.7991	16.9495	16.7586	12.1881	42.9764	15.6855
ENSG00000168306.12	ACOX2	15.9044	0.543099	0.812146	1.49539	0.0171505	0.136109	0.92845	0.358213	0.11751	0.404205	0.325001	0.3359	0.937869	0.299674	0.283355	0.292325	0.456233	1.12709	0.371924	0.272627	0.430396	0.60762	0.607987	0.373695	1.34988	0.729995	0.871898	1.34166	0.883046	0.916214	0.417687	0.408771	0.319056
ENSG00000145545.11	SRD5A1	273.569	12.342	7.01831	0.568651	0.0337901	6.05921	19.6171	10.2847	24.9805	30.5181	8.30881	5.75453	5.50523	12.5579	7.17522	22.3716	5.13462	11.5008	4.05893	9.80323	8.70354	6.96272	5.58349	5.89648	3.03841	8.70248	9.0792	4.29019	6.29824	15.3391	3.0579	6.08851	6.89783
ENSG00000153767.9	GTF2E1	206.66	8.38137	6.44149	0.768548	0.0376329	8.20858	6.81896	7.54752	6.86259	6.63428	4.13511	8.17361	6.63327	15.4421	8.11178	12.3855	10.514	7.29208	5.5753	9.88589	6.89988	5.92474	5.48612	5.32954	3.15095	5.64246	7.60156	7.13301	4.38178	6.23325	8.39191	7.33333	8.93082
ENSG00000180828.2	BHLHE22	20.8724	0.624026	1.10092	1.76423	0.0183979	0.214693	1.66649	0.678035	0.32437	0.451616	0.897124	0.347703	0.946351	0.512083	0.209509	0.123509	0.607198	0.300007	0.0799985	0.501701	0.672827	0.893086	1.03573	0.361708	1.84261	0.503764	2.01606	2.66424	0.773821	0.510069	0.853499	0.591045	0.293571
ENSG00000112183.14	RBM24	6.75564	0.245475	0.451809	1.84055	0.0648923	0.101673	0.21524	0.321102	0.0877796	0.352265	0.242776	0.047047	0.18545	0.149238	0.0396874	0.0467929	0	0	0.189427	0.203652	0.189459	0.0825259	0.354249	0.0380659	1.22166	0.0681632	0.310851	0.536904	0.256525	0	0.553113	0.763379	0.198612
ENSG00000041988.15	THAP3	73.3925	2.30634	3.1998	1.38739	0.0411592	2.06383	3.12511	1.51067	2.11589	1.72378	2.05334	1.61154	2.69257	2.35088	2.014	2.05797	1.24306	3.09758	2.01869	3.41617	3.2048	1.79731	1.45198	3.15513	5.85511	4.78502	2.723	2.2705	2.16962	2.40056	2.26708	2.53955	5.67777
ENSG00000160345.12	C9orf116	11.7443	0.635552	0.38546	0.606497	0.15676	0.563568	0.994216	0.22248	0.405463	0.0464899	1.1214	0.0434629	0.628181	0.689343	0.513296	0.345825	1.4168	0.408343	0.0699987	0.564414	0.254583	0.457434	0.302089	0.140664	0.214971	0.377823	0.451268	0.297601	0.270837	0.111578	0.235835	0.37612	0.220178
ENSG00000156958.14	GALK2	138.752	4.62357	5.55375	1.20118	0.0461285	4.25441	3.74039	2.49633	5.94108	4.7868	4.7	5.61543	5.88002	4.3252	4.11992	4.08718	3.68205	4.66362	4.46995	5.09122	5.04883	4.6137	5.10929	3.98641	5.32075	4.92513	5.87914	8.2744	3.40203	7.12508	4.68919	5.58561	6.9392
ENSG00000103657.13	HERC1	463.707	15.2777	18.257	1.19501	0.0311689	15.5338	13.0554	12.3011	14.5457	11.1898	14.0718	12.4423	22.9276	15.1339	14.7079	15.6826	17.8352	18.3958	12.089	17.7541	14.4807	14.5793	15.7286	22.5558	18.3634	24.9856	19.9503	26.1539	17.3629	15.3427	14.7881	17.9352	13.8144
ENSG00000178175.11	ZNF366	43.8733	1.3056	2.08379	1.59604	0.0195792	0.264274	1.05676	1.86051	1.10278	1.00282	1.12184	0.55029	3.13319	1.6486	1.65052	0.871654	1.38412	0.875358	0.590842	0.97046	1.38781	1.87692	1.79434	1.28625	1.00807	3.54346	1.92376	4.69833	3.46086	1.36038	1.06904	1.27871	1.10132
ENSG00000102753.9	KPNA3	472.295	18.7429	14.9194	0.796002	0.0378136	28.0193	17.4801	21.5354	10.237	17.2578	17.7851	17.2206	12.0629	18.7255	19.919	28.0057	21.9387	19.3946	14.6984	15.3632	20.4841	17.1681	13.6137	9.87491	8.91154	8.55273	14.8871	13.2669	14.5844	22.9179	15.7209	16.2187	16.4507
ENSG00000196378.11	ZNF34	114.498	3.64399	4.81828	1.32225	0.0227135	5.9096	2.6689	2.98616	5.44218	2.96397	3.13576	3.06267	5.31762	2.80465	2.7066	1.8857	4.35793	3.6702	2.40755	3.84043	5.09888	2.81405	3.92797	4.42503	9.10696	4.33165	4.99013	6.65741	3.23761	4.39923	4.15461	3.39185	4.8023
ENSG00000161800.12	RACGAP1	346.71	13.7969	10.9659	0.794809	0.0320145	9.98906	20.7336	10.8905	14.0814	10.9118	13.603	13.8847	9.10989	18.1271	17.4853	12.0857	18.4909	9.88728	12.6785	13.4951	14.5816	13.5554	12.3821	7.24594	11.6095	9.05114	10.6856	9.23105	5.4287	10.0583	6.89064	16.0545	14.4823
ENSG00000149328.14	GLB1L2	20.6453	0.581691	1.1323	1.94657	0.0676504	0.865789	1.30676	0.0569648	0.0207632	0.154745	0.937954	0.645448	0.263196	0.679533	0.600807	0	0	0.268852	0.573528	0.851031	0.953323	0.0878424	0.296501	2.82727	2.06408	0.386957	0.777299	0.101599	0.520097	1.3713	1.97255	1.6853	0.375835
ENSG00000135835.11	KIAA1614	23.0664	0.732692	1.14431	1.56179	0.0370327	0.721278	0.581687	0.494905	0.518928	0.467498	0.478407	0.246342	1.27383	0.95157	0.750787	0.221301	1.2952	0.629271	0.435139	0.424244	0.45383	0.773622	0.708814	0.630098	1.10052	1.49672	2.66274	1.86814	0.804675	0.244803	1.03485	0.790829	1.0064
ENSG00000163431.12	LMOD1	72.2309	1.99859	3.46555	1.734	0.0148662	0.925892	0.186675	1.14876	1.90325	2.68417	1.01769	2.30538	4.53028	3.07401	0.998192	2.02914	1.21926	0.629797	3.08862	2.73769	3.16681	1.98617	2.93056	3.23538	2.37134	1.83263	6.3548	9.82521	3.21008	1.57125	2.14023	2.95724	2.1704
ENSG00000134072.10	CAMK1	54.4855	1.74916	2.38832	1.36541	0.0470648	0.708051	1.81688	1.11807	2.50075	1.52924	2.56164	0.923332	2.50466	2.26753	1.70854	1.00722	1.94184	1.47913	1.29518	1.37525	1.48295	3.00415	2.31172	1.01216	3.9776	3.79749	2.89572	2.17541	2.59844	1.37634	1.40068	1.80427	1.91123
ENSG00000164035.9	EMCN	47.4519	1.30455	2.36029	1.80928	0.0211386	0.467508	0.659802	0.962342	0.403622	1.30572	1.11631	0.988929	2.43635	1.7768	1.38169	1.27559	1.46913	1.01622	0.846126	1.96202	1.60655	1.27392	1.93318	1.02519	1.1464	1.34324	3.63168	7.51206	2.79237	2.53877	0.558963	2.27322	1.74821
ENSG00000269743.2	SLC25A53	47.1425	1.60214	1.99311	1.24403	0.055926	0.741763	1.15516	1.56511	1.10414	2.24081	1.8119	1.70433	2.13052	1.58622	1.01839	1.54209	1.51111	1.4138	1.48682	1.51991	2.09714	1.79583	2.63243	2.50898	1.69766	2.16063	1.89917	2.78242	1.77008	1.24576	1.1774	1.84362	0.999299
ENSG00000027869.11	SH2D2A	120.255	3.28418	5.67631	1.72838	0.0125616	2.30004	2.45915	4.53995	4.69355	3.38073	2.55185	1.12879	6.05975	3.47833	2.33973	0.994385	8.67336	1.90461	1.35048	1.90794	2.5739	15.4725	4.14698	2.60945	3.90816	7.28934	4.10962	5.66801	6.63206	2.64944	9.5666	4.32597	3.53991
ENSG00000005302.18	MSL3	138.714	4.50143	5.69172	1.26443	0.0488255	3.20446	3.62559	3.39932	3.29206	3.3316	5.68527	4.20814	6.07342	5.60353	3.8154	3.16377	6.66077	4.71411	3.94901	5.295	3.60274	6.20458	5.47932	2.96246	3.48262	5.56881	7.26381	8.7539	7.74295	5.63547	5.88826	5.64525	4.46222
ENSG00000100714.15	MTHFD1	301.693	9.49214	12.4701	1.31373	0.0474538	7.78597	8.31382	10.8795	6.54468	6.51523	13.4494	10.6528	9.78547	13.566	9.95572	5.74018	10.9134	11.0858	8.01483	7.67923	7.92634	17.7921	14.7224	9.42313	11.7088	7.73584	8.88895	13.8825	8.27762	7.89604	18.9084	12.5234	21.1253
ENSG00000125089.16	SH3TC1	98.3771	2.50877	4.88812	1.94841	0.0169048	1.27266	1.49288	3.19063	7.69124	2.26603	1.36814	1.3078	3.93917	1.52839	1.6129	0.806305	3.46952	3.49006	1.51503	1.18077	1.48393	11.269	1.8605	2.43807	4.10428	10.9477	2.93086	3.85774	11.5451	2.88617	4.27438	1.93588	2.71206
ENSG00000135185.11	TMEM243	115.007	3.6657	4.83241	1.31828	0.0464312	3.90736	4.26809	2.00738	2.54161	3.84142	3.32301	3.76468	5.62994	2.23911	2.1729	6.08456	2.62395	3.52369	2.91191	4.64583	4.47921	3.95352	6.79981	3.24641	2.3888	5.95677	6.77962	6.55748	3.54978	6.10399	2.55345	5.30477	3.84774
ENSG00000104321.10	TRPA1	9.62504	0.344093	0.558742	1.62381	0.119205	0.0549104	0.038748	0.390187	0.284441	0.489204	0.26223	0.0508169	0.317158	0.110822	0.45011	0.240077	0.138043	0.323974	0.32737	0.183309	0.679034	0.735395	0.264902	0.0411162	0.0314181	0.552189	0.299786	0.231971	0.514578	0.0978426	1.2638	0.522215	0.729392
ENSG00000025434.18	NR1H3	89.569	2.61654	4.08622	1.56169	0.0214191	1.54495	2.26218	1.67723	3.53465	1.96905	2.21342	1.25106	5.30714	2.15431	1.59811	2.82634	2.33038	5.01341	1.89974	2.16618	3.16676	9.9693	4.55477	3.18131	3.4917	6.16275	2.91842	6.0372	3.81443	1.55997	2.16582	2.47461	2.32383
ENSG00000181396.12	OGFOD3	91.5431	2.78773	4.04055	1.44941	0.0908571	2.24639	3.20904	1.75199	3.07469	1.88474	2.55114	1.76202	2.3818	1.77933	3.16526	1.95423	4.40771	4.4066	2.61323	3.12772	1.29012	3.35762	3.37744	4.67698	8.62104	6.94234	3.63741	3.73233	3.17945	3.18919	4.3563	3.83947	1.02747
ENSG00000138722.9	MMRN1	47.6193	1.15684	2.54359	2.19874	0.0840703	0.508404	0.829632	1.99449	1.09732	2.01309	1.01164	0.838085	2.6274	0.862842	0.223258	0.204734	0.519235	0.41442	0.947206	1.76087	2.17463	3.84289	2.12906	1.18965	0.727234	0.511261	7.53592	5.60434	5.10796	1.58533	0.558471	0.477146	0.322768
ENSG00000204482.10	LST1	144.336	3.77942	6.95725	1.84083	0.0366836	2.07243	2.27488	2.21199	5.63275	3.45717	4.58198	3.72931	10.6868	3.40809	2.09729	2.2255	3.95576	3.14624	1.20124	4.50981	2.13243	10.124	5.47212	3.10362	2.28373	14.4084	5.73269	17.1047	13.2241	3.28247	5.58891	3.68831	2.99877
ENSG00000132359.14	RAP1GAP2	144.007	3.91085	6.78034	1.73373	0.0135995	7.27763	2.24782	5.67257	7.28682	1.40401	3.62725	3.73336	2.89799	1.80881	7.8053	2.06526	2.19199	1.63176	4.60917	2.903	5.04162	4.73698	7.80204	20.0566	2.44787	5.45577	2.7724	4.86216	6.58706	5.44119	3.93088	7.68123	10.0287
ENSG00000173432.11	SAA1	207.567	10.7688	3.75648	0.348828	0.0872189	0.879808	7.76054	2.17077	21.4581	14.6969	4.37667	41.0163	12.1693	5.73055	3.9494	7.59208	12.4415	24.4519	0.163917	1.17484	6.55775	1.96382	2.94751	1.64697	0.5034	6.48818	12.2005	0.464597	0.951333	3.39667	3.31354	5.72496	1.37491
ENSG00000198146.4	ZNF770	619.513	25.2764	18.7052	0.740027	0.0339054	24.9795	31.4151	29.8504	14.0346	21.5886	21.7523	44.9686	18.8471	17.612	26.6381	31.3924	15.2544	33.9062	17.896	27.5101	19.849	14.6447	22.1724	13.8836	5.93066	7.12161	23.0435	17.6444	23.2511	21.299	16.3532	21.6874	34.987
ENSG00000149212.11	SESN3	651.168	27.8607	18.1583	0.651753	0.0251678	40.3385	27.1915	18.8335	25.991	13.6055	20.4555	40.3197	16.6322	29.2462	35.3053	10.7228	50.2055	14.9019	49.8192	22.8419	14.6429	5.98787	38.6917	26.9439	17.3388	9.39194	32.2932	27.5624	12.7249	15.7761	6.65237	18.4837	8.26802
ENSG00000108509.20	CAMTA2	269.017	8.4878	11.1154	1.30958	0.0534221	10.3024	4.55144	8.00741	12.7245	8.71049	9.10593	6.64433	10.274	6.95052	10.1163	8.13966	7.22702	9.04471	7.00346	7.01495	6.00199	7.04744	9.82449	12.0194	9.78554	19.6444	11.8802	15.2268	12.3075	16.7452	8.35373	7.36264	7.00097
ENSG00000189134.3	NKAPL	11.7435	0.394772	0.663221	1.68001	0.0373148	0.427289	0	0.337363	0	0.475848	0.170047	0.296577	0.779364	0.117596	0.166789	0.0983249	0.134274	0.331714	0.159216	0.927183	0.180957	0.823698	0.286299	0.0799872	0.733446	1.14584	0.886467	1.12819	0.231013	0.25379	0.894035	0.427753	0.250404
ENSG00000171603.17	CLSTN1	1967.83	77.4959	62.1682	0.802213	0.0756145	74.124	76.5245	89.8658	78.0651	107.715	65.1034	74.3147	57.579	58.4473	76.892	99.6618	32.1032	110.821	105.911	53.8097	53.8067	60.2021	56.4778	60.7397	77.7368	43.4561	51.6704	45.0642	58.2748	74.5847	85.6813	65.723	73.4692
ENSG00000177054.13	ZDHHC13	173.947	7.12841	5.37086	0.753444	0.030235	7.82602	5.47475	8.42263	4.67313	4.78886	8.00612	10.6865	4.73072	6.3146	6.7435	13.3171	7.45586	5.08452	4.25233	7.64953	8.22946	4.75041	4.71481	5.01564	4.02616	4.7477	4.31452	7.36018	7.20225	6.29595	3.28438	5.68961	2.8901
ENSG00000133641.17	C12orf29	106.103	4.41931	3.27797	0.741737	0.0287043	2.25159	4.99628	4.90482	2.97441	3.16875	4.87974	5.51062	2.82036	3.65333	4.638	6.59201	4.09189	3.94239	2.48663	7.87882	3.87855	2.15785	3.12636	2.2141	2.32824	2.69163	3.63745	2.49258	2.83552	3.48031	2.17959	6.3276	3.9638
ENSG00000160219.11	GAB3	78.8365	2.18697	3.75631	1.71759	0.0317596	1.16234	1.96852	2.08453	2.17904	2.05466	2.00889	1.10642	5.9968	2.3276	1.52965	1.02403	3.59	1.15501	1.18796	1.92906	1.36143	5.86283	4.21893	1.81529	2.3182	5.1653	4.42397	9.57517	5.60189	1.8147	2.4737	1.62904	1.27151
ENSG00000134333.13	LDHA	2131.6	91.1404	59.0224	0.647599	0.0278617	86.2158	67.2252	206.05	96.633	117.469	89.02	126.128	28.8833	116.079	52.1642	89.9455	116.736	49.7454	78.2865	45.0267	54.4177	148.734	72.51	61.5806	42.6516	13.9114	30.3661	38.7685	73.8766	36.0701	81.2888	49.0535	62.7624
ENSG00000132153.14	DHX30	240.767	7.82747	9.70421	1.23976	0.0370416	8.02609	6.41351	5.0874	9.62295	6.36724	9.15945	6.37114	10.5019	7.15143	9.70763	6.96103	7.55941	7.93334	6.23408	8.81553	7.71346	6.32189	8.09543	12.7645	14.0485	16.006	7.4455	8.57212	9.97425	9.23881	8.17432	9.25699	7.24298
ENSG00000173258.12	ZNF483	36.6403	1.04187	1.83171	1.7581	0.00429524	3.23434	0.839729	0.34932	0.237087	0.39266	2.18574	0.197666	3.02388	0.548639	0.666981	0.702137	0.421895	0.454803	0.363827	0.509308	1.0958	0.557244	1.94633	2.10197	1.88551	1.43193	1.66586	3.86705	1.23175	0.797416	0.944875	2.84076	2.14576
ENSG00000178031.16	ADAMTSL1	10.2366	0.365714	0.580837	1.58823	0.0218521	0.397563	0.045249	0.237951	0.166082	0.279293	0.398094	0.296714	0.358674	0.230596	0.200239	0.153458	0.370769	0.135402	0.458755	0.256877	0.23463	0.369535	0.398713	0.432131	0.51365	0.343912	1.02504	1.46281	0.48073	0.213282	0.214668	0.231094	0.330686
ENSG00000110031.12	LPXN	172.28	5.03699	7.6558	1.51992	0.031215	3.61944	3.25521	3.95036	8.02655	4.70695	4.7449	2.46296	12.9878	5.54704	2.93645	2.77627	8.56395	3.43794	3.4378	3.60118	3.84712	14.113	7.72246	2.28507	5.03522	7.99325	10.601	12.0675	10.6923	7.25024	7.30582	5.54163	3.77084
ENSG00000134762.16	DSC3	3831.76	163.993	105.744	0.64481	0.111537	324.631	168.232	139.518	97.1506	285.75	143.994	205.316	29.8405	290.349	173.353	144.128	35.7436	173.29	133.991	113.102	171.279	48.0848	142.728	86.8977	83.878	58.2893	100.615	46.4108	83.3531	173.347	155.545	61.827	161.117
ENSG00000011638.10	TMEM159	430.495	18.0818	12.4667	0.689461	0.0241424	20.465	28.4479	16.0229	26.7685	13.9234	10.4052	20.998	10.3202	17.104	14.8546	40.3831	11.7867	11.1371	11.5277	15.5831	18.0643	5.58327	11.4835	10.7626	13.4717	13.307	14.3791	12.6502	11.7428	22.6031	8.70716	9.45563	8.55693
ENSG00000133574.9	GIMAP4	348.297	9.15558	16.4433	1.79599	0.0314532	4.07167	5.69007	10.2116	9.44297	9.2861	8.00661	6.57576	30.92	14.5896	6.79366	5.10727	7.62688	6.1979	4.22431	7.08947	9.06132	34.7336	19.172	6.815	4.84209	16.4852	21.5495	35.3293	29.2361	4.64708	11.4259	10.8696	8.29682
ENSG00000165269.12	AQP7	8.35564	0.22924	0.593619	2.58951	0.0524222	0.133319	0.0705585	0.0263153	0.230202	0.0659868	0.0795849	0.0925356	0.182378	0.134535	0.208161	0.0920357	0.167581	0	0.0993547	0.356052	0.191967	0.027053	0.196523	0.199656	1.33492	2.18979	0.232917	0.528011	0.480526	0.950226	0	0.033366	0.052086
ENSG00000010932.16	FMO1	59.2704	1.50971	3.03267	2.00877	0.0580501	0.0972136	0.548797	2.60965	0.167858	4.71538	1.12194	0.382358	2.51196	2.33657	0.948664	1.25273	0.122196	0.845254	1.9923	1.49285	1.71268	3.17596	7.32136	0.545943	1.44619	0.521386	6.47506	6.10889	3.39877	1.27029	2.9697	0.291957	2.88648
ENSG00000120279.6	MYCT1	47.0423	1.42448	2.19039	1.53768	0.0715287	0.63561	0.448524	2.37234	1.14739	2.11638	1.28775	1.12298	1.86196	1.29342	1.30819	1.67537	1.30738	1.07659	1.2488	0.964491	1.54657	3.72862	2.1991	0.995141	0.528985	0.697289	2.19566	5.24826	2.37425	1.92193	1.54754	2.02459	2.16719
ENSG00000179477.10	ALOX12B	266.149	13.6255	4.96667	0.364513	0.144178	20.1478	2.20461	47.3451	22.0184	26.0035	20.6036	29.7094	2.20959	3.11173	13.091	6.13279	0.721296	0.158392	5.89192	3.53328	3.73707	0.828023	3.65689	10.2167	0.729618	14.7897	4.53915	1.34676	2.80365	7.64969	2.29457	10.2763	0.398555
ENSG00000197013.9	ZNF429	62.0029	1.77464	2.93718	1.65509	0.0388445	0.762129	3.20237	0.464975	2.1833	1.8175	1.04777	0.641194	2.65383	0.902556	0.405669	4.20902	1.17571	2.7539	1.8588	1.04083	3.63841	2.01045	2.46971	5.81048	6.0653	2.32246	2.93531	4.17089	2.27248	2.3868	0.985773	0.624236	1.19101
ENSG00000267673.6	FDX2	7.69314	0.462809	0.273154	0.590208	0.0635322	0.127704	0.991267	0.151241	0	0.252829	0.508217	0.236367	0	0.609196	0.299089	0.470181	0.642088	0.317245	0.666187	0.170527	0.173064	0.051827	0.273811	0	0.146136	0	0.167329	0.269744	0	0.1517	0.10688	0.511369	0.399136
ENSG00000173376.13	NDNF	20.3252	0.515082	1.18454	2.29971	0.00375421	0.196942	0.243204	0.272115	0.127522	0.365539	0.470258	0.159478	1.82602	0.198739	0.269062	0.249255	0.680774	0.33636	0.403615	0.427349	0.450389	0.499541	0.844534	0.921675	0.50708	0.660163	2.92459	1.97597	1.73912	0.818822	0.659313	2.02085	0.0769426
ENSG00000113522.13	RAD50	38.198	1.34707	1.59939	1.18731	0.0291995	0.931762	0.986259	1.21668	1.5934	1.44562	1.3121	0.920341	1.12211	1.32163	1.00719	0.824658	0.788317	1.9586	1.60243	1.6749	2.00337	1.5053	1.36389	1.43564	1.53786	1.63374	1.72176	1.43825	1.52418	0.979133	1.24472	1.70411	1.4001
ENSG00000176946.11	THAP4	309.953	9.98987	12.5312	1.25439	0.0480844	7.95573	14.4473	8.9389	9.1741	6.36091	10.4947	6.41014	9.60638	8.1661	8.33913	8.5775	10.8394	13.6827	14.843	10.5121	17.8312	11.5602	8.20097	10.248	17.4441	15.6652	12.6599	6.58083	11.47	11.0368	14.2481	8.96687	15.6931
ENSG00000121022.13	COPS5	194.969	6.43686	7.78582	1.20957	0.0364951	3.8712	7.28994	4.97566	6.8787	5.58108	5.33838	7.05066	8.18306	6.21077	8.69756	5.65564	4.32852	6.2622	6.52472	8.20483	6.99248	7.73665	7.22657	6.55579	8.83418	6.1563	6.22254	11.695	6.70071	6.52363	5.48154	9.08015	10.7101
ENSG00000168209.4	DDIT4	1163.39	51.3708	30.433	0.592419	0.0628671	100.047	39.982	78.1515	95.1889	39.202	20.3816	122.349	19.9655	27.9402	15.9398	48.2367	39.1388	39.5211	62.5126	20.5051	17.0632	47.7496	29.1853	44.5915	21.223	23.6123	22.8145	28.3923	46.1789	14.5526	41.2968	27.4235	30.2458
ENSG00000123066.8	MED13L	317.254	12.2199	10.5196	0.860859	0.0248168	11.0492	11.712	9.91327	12.2781	10.6756	10.2788	11.2641	15.6749	11.1165	14.0327	10.828	14.1067	12.6069	11.3981	14.8639	9.67939	7.55542	8.68562	8.23842	9.12645	11.8244	12.0607	15.772	11.4442	11.1494	7.49054	12.8578	9.57086
ENSG00000170231.15	FABP6	62.9792	3.36641	1.17562	0.349222	0.0321273	0.300828	5.94388	0.831307	2.33747	1.78675	1.07747	6.12484	0.823053	2.0974	0.704554	8.72228	0.756273	12.144	0.224188	5.12175	0.713445	0.0610436	0.483757	0.450512	0	0.806715	1.64238	0.476571	0.433712	1.6081	1.13298	1.35519	4.8187
ENSG00000143341.11	HMCN1	109.252	3.32678	4.78077	1.43706	0.0168941	1.13084	1.63587	3.78714	2.26991	4.43104	2.15267	1.59597	7.58584	5.9409	1.5008	1.50928	5.89901	1.46316	4.34715	3.15222	1.89968	5.61049	5.55648	5.77911	3.5371	3.33576	6.51548	6.70806	5.08128	3.29115	5.43413	4.30184	3.7995
ENSG00000166343.9	MSS51	79.3562	2.46762	3.47246	1.40721	0.0277978	3.75743	2.29453	1.54038	2.43298	2.21739	2.12797	1.93928	4.56897	2.09471	1.29745	0.698359	2.17987	4.3979	2.42323	1.54382	1.93401	3.40171	3.40846	1.7855	2.89408	4.94117	3.12442	6.71566	3.07321	3.17593	1.93522	4.62955	2.82303
ENSG00000122025.14	FLT3	20.6711	0.551446	1.16919	2.12022	0.0431532	0.29468	0.415886	0.38223	0.290755	0.562573	0.670128	0.0973971	1.51008	0.633353	0.394374	0.154994	0.370408	0.313737	0.0627447	0.61835	0.713126	1.05924	1.06057	0.157609	0.0963467	1.52401	1.85704	3.60127	1.66905	0.600089	0.352326	1.01143	0.197361
ENSG00000100650.15	SRSF5	1377.55	43.2898	56.2309	1.29894	0.0367234	43.1413	30.1201	49.5575	45.9367	29.9102	52.3908	28.4618	61.9374	38.7375	46.3096	24.0363	50.9826	62.4973	26.3293	57.4989	31.6354	48.7316	52.7845	70.8967	61.0746	102.324	50.7465	76.6286	58.1222	45.8901	47.9779	45.7074	37.1825
ENSG00000148297.15	MED22	136.528	4.43438	5.60098	1.26308	0.0320829	4.75028	2.8048	3.60703	5.2729	3.43078	5.63277	2.00743	4.45008	5.01594	3.80307	2.78853	7.18962	5.43378	4.91278	3.91596	4.81177	4.10158	3.89738	7.85796	9.15234	5.88185	4.50941	5.42647	4.97922	5.95958	3.93511	5.33773	5.66229
ENSG00000119707.13	RBM25	1359.7	43.9645	54.0792	1.23007	0.0449356	56.4708	26.5973	39.7953	42.6231	27.7312	56.8741	40.5587	56.7293	50.5349	49.7104	34.0886	39.2495	61.5611	28.8483	46.5949	31.7222	47.1422	52.3018	63.7642	70.518	78.9046	51.7534	67.8423	40.8036	39.7582	48.6958	57.1085	51.4154
ENSG00000139644.12	TMBIM6	1725.23	69.0809	53.2166	0.770353	0.034683	53.5491	102.757	68.6591	42.0042	58.5839	80.0842	63.4918	53.5166	77.416	71.4793	100.95	82.9286	57.989	43.2605	78.0443	62.5781	65.0014	57.5898	25.1347	29.0845	19.3541	68.9906	51.3837	54.9033	66.9062	33.2576	87.4659	68.8664
ENSG00000185811.18	IKZF1	120.836	3.17524	5.84672	1.84135	0.0353572	1.72999	2.30593	2.36504	2.1574	3.09207	3.93963	1.5269	11.5116	4.14988	2.01336	1.48917	3.64444	2.25828	0.704316	3.24058	3.41363	7.85958	7.17819	1.12748	1.88805	6.87295	11.0821	13.7033	9.63031	3.40609	2.86898	3.6241	2.05269
ENSG00000026025.15	VIM	1755.47	48.8002	78.9433	1.61769	0.0384325	18.8048	46.3484	77.1706	31.972	78.0553	34.0953	31.4447	88.3078	91.6494	27.5063	36.6019	45.4829	21.4605	67.9708	33.6321	38.8016	182.913	70.5049	39.7008	32.6283	32.6781	84.6679	127.981	103.821	46.7332	139.459	57.4951	67.5798
ENSG00000180061.9	TMEM150B	20.6084	0.55168	1.16409	2.11009	0.0041877	0.102208	1.29823	0.524532	1.76482	0.202352	0.244051	0.236471	0.559272	0.600086	0.239376	0.0470387	0.256948	0.190431	0.304676	0.204722	0.623305	2.32286	0.657435	0.535723	1.87137	1.50747	0.66961	1.29534	1.54723	0.242826	1.79637	0.204637	0.559036
ENSG00000148331.11	ASB6	154.449	4.57235	6.82032	1.49165	0.0482911	5.03805	4.00956	4.84509	5.3634	5.26842	4.79385	2.54158	5.41223	4.79557	4.22885	2.87652	5.19001	4.18758	4.96842	3.56607	6.3014	3.82792	3.85792	10.4947	16.4721	11.9358	5.06267	5.92095	6.33508	5.30976	3.01181	3.29914	5.53491
ENSG00000166169.16	POLL	116.323	3.76212	4.8224	1.28183	0.0310707	2.58423	4.14866	2.72898	3.70919	2.27035	2.93105	2.67558	5.99016	2.51297	3.48013	3.4342	3.32956	6.29946	4.09247	4.74487	3.16289	3.13323	3.13407	6.40982	6.57986	7.01663	4.48658	5.21977	4.77363	4.3745	3.40647	5.75616	3.93753
ENSG00000184785.5	SMIM10	31.3725	0.961266	1.5195	1.58073	0.113635	0.683913	0.643478	0.854966	0.295227	1.12835	0.635073	0.791161	1.10884	2.09137	0.622906	0.839347	0.429835	0.991082	0.509678	1.29377	0.540657	1.11023	2.44398	1.10956	1.6957	0.152835	2.24032	3.25036	0.903849	0.541616	1.04938	2.16807	1.24691
ENSG00000070882.12	OSBPL3	348.83	11.0375	14.3128	1.29675	0.0358228	7.13296	11.1041	10.1628	20.3781	8.64432	9.06656	15.2328	10.6317	8.12206	14.0733	9.58969	14.6174	4.60449	7.97363	12.7287	13.0206	12.8249	15.4793	7.65553	22.5088	18.1427	18.3149	17.1213	12.6833	11.7085	12.1748	8.59048	14.5418
ENSG00000053108.16	FSTL4	55.8807	2.91269	1.15311	0.395891	0.0340383	2.75596	8.54964	0.390029	1.70595	0.334584	2.19356	0.926366	2.68729	1.38339	1.19755	0.0717944	2.45109	2.03456	9.57171	5.93682	1.94672	0.0105516	0.919814	1.61586	0	2.82374	2.11216	0.713937	0.131196	1.57514	0.1088	1.69181	0.0406308
ENSG00000120519.14	SLC10A7	85.7052	2.78554	3.59401	1.29024	0.0475061	2.14696	1.62587	3.02847	1.65013	3.62853	2.47989	3.18632	3.02455	1.8735	2.98427	2.50637	4.34425	2.34155	2.26341	3.19905	3.64583	2.98585	4.23843	2.01932	1.73777	2.63295	3.60219	4.6179	2.98209	4.1988	6.3986	3.35498	3.00736
ENSG00000188321.13	ZNF559	72.1296	2.27651	3.13708	1.37802	0.0233681	1.98751	3.78858	0.478919	1.84962	1.75026	1.58192	1.4452	2.63649	1.18397	1.04785	0.914706	2.59561	4.16797	3.78949	3.42951	2.24748	2.03223	2.93321	4.87055	3.66265	3.28787	3.9007	4.14363	2.177	2.91289	2.37632	1.91215	3.0253
ENSG00000105643.9	ARRDC2	220.517	6.24126	9.97681	1.59852	0.0226907	10.4966	3.43707	4.96356	7.88869	7.30708	5.80012	4.96188	7.04757	4.66922	9.01987	3.42328	5.83767	3.44709	3.43288	10.3863	7.58583	6.88022	7.46824	12.2702	11.0611	28.3507	8.1961	11.1257	12.4659	5.65141	8.53218	5.32959	3.48132
ENSG00000188033.9	ZNF490	42.4697	1.36878	1.90292	1.39023	0.0607071	1.24525	1.2051	0.912949	1.25938	1.49682	1.21768	0.444504	1.57909	1.51445	0.277756	1.30993	0.804991	1.43626	2.09464	2.23293	1.75989	1.14069	1.56383	3.48993	1.99498	2.76686	2.23768	2.40484	1.64142	1.31018	0.893308	1.56715	0.667201
ENSG00000099995.18	SF3A1	699.521	26.7689	23.1375	0.864345	0.0615127	22.7117	33.4198	23.3703	18.7244	19.4701	27.3466	27.9565	30.7285	25.7637	31.5739	28.7349	17.5601	28.9321	34.4284	29.3118	26.2239	25.1482	20.6263	18.8705	23.1408	18.1008	24.7206	20.0131	26.1434	24.9748	24.4259	19.3023	27.7974
ENSG00000204472.12	AIF1	206.452	5.42062	9.84174	1.81561	0.0386261	1.50933	8.23007	4.87504	5.21229	6.04427	4.36844	6.28564	12.2632	9.16372	4.17763	2.84168	4.82924	5.11297	2.14736	2.74835	5.62497	28.0098	11.7679	3.69872	3.45436	4.78339	11.0869	19.9981	14.2432	3.09689	7.80893	7.28009	5.78951
ENSG00000100170.9	SLC5A1	69.4932	3.84511	1.12435	0.292409	0.00509417	6.33064	2.14057	10.5433	1.73645	7.42542	1.8108	2.47164	1.56365	0.955837	1.54445	11.2141	0.414455	0.634805	6.70817	0.682446	2.06663	0.240864	0.512546	0.913496	0	0.751567	0.403229	0.557166	3.47018	1.84088	0.772675	1.45235	0.334925
ENSG00000128626.11	MRPS12	137.959	5.6044	4.361	0.778139	0.0452866	5.71629	3.16937	4.60996	6.13368	4.28435	5.06975	4.0054	2.97896	6.47262	8.86148	9.43326	5.02971	5.83238	4.80771	6.16105	5.69938	4.20893	3.85201	3.85226	5.88724	3.50379	4.24434	2.15613	2.94333	5.62634	5.19424	4.33274	3.89228
ENSG00000052749.13	RRP12	177.229	5.79212	7.1652	1.23706	0.0538353	4.98826	3.69383	6.92064	7.31945	4.69406	6.35577	7.01008	6.14052	5.0846	6.6026	6.70769	3.01898	5.82627	4.60473	6.41429	9.4864	6.58979	6.05193	8.19273	11.6984	7.54164	5.245	4.16258	5.91911	7.0473	8.46997	4.70597	6.73674
ENSG00000109906.13	ZBTB16	18.0879	0.42415	1.11736	2.63434	0.00545014	0.549535	0.0969459	0.260329	0.284664	0.163196	0.0874785	0.114428	0.835281	0.211736	0.150154	0.0379366	0.483531	0.460745	0.24572	0.880575	0.353747	0.223022	0.618589	0.637801	0.69174	2.17365	1.84813	2.46662	1.02996	0.261118	0.0919851	0.467611	2.36165
ENSG00000169313.9	P2RY12	8.12499	0.277514	0.520175	1.87441	0.00848052	0.188361	0.598134	0.148719	0.162621	0.0932298	0.149923	0	0.458088	0.172799	0.0735253	0.0866889	0.355152	0.175475	0	0	0.350993	0.879107	0.302901	0.0705212	0.215549	0.25256	0.411347	1.59148	0.271566	0.223755	0.315293	0.282848	0.29436
ENSG00000189007.15	ADAT2	102.365	3.29995	4.282	1.2976	0.0429709	2.75738	3.20277	2.40827	3.0758	1.73918	3.82614	2.56312	4.10957	3.37575	3.40994	1.71823	2.76053	5.59213	2.49135	4.96911	2.00895	3.70376	4.40795	3.70914	4.41196	3.53358	3.99666	5.05119	2.65613	5.0727	2.92043	6.44902	6.44456
ENSG00000163820.14	FYCO1	247.364	7.83683	10.2009	1.30167	0.0729999	7.20404	6.31976	7.35852	11.3516	6.29348	6.62691	7.10417	11.8236	7.15779	8.09805	10.1548	7.32348	5.9166	4.73797	8.5816	6.16185	4.70503	9.64338	11.7319	12.2307	17.4185	10.514	12.7639	13.1389	12.6028	6.24348	8.23649	5.92125
ENSG00000157017.15	GHRL	18.7342	0.481864	1.10048	2.28379	0.00847931	0.424132	0	0.301383	0.439408	0.377865	0.472613	0.27476	0.876753	0.249018	0.132445	0.117118	0.106626	0.474139	0.632159	0.849537	0.40235	0.550812	0.863919	0.571653	0.388281	2.7297	1.18557	2.15011	1.58986	1.71302	0.425966	0.169837	0.265124
ENSG00000257138.1	TAS2R38	7.29251	0.254843	0.482298	1.89253	0.0482397	0	0	0	0.132245	0	0.121919	0.212638	0.0931305	0	0.837082	0.140993	0.385084	0.285396	0.114154	0	0.415173	0	0.98529	0.344092	0.175287	0.616152	0.869731	0	0	0.18196	0.256399	0.766718	0.359066
ENSG00000163239.12	TDRD10	17.9012	0.427819	1.09876	2.56828	0.000101125	0.258805	0.228285	0.204338	0.167579	0.256193	0.205991	0.329329	0.708081	0.902209	0.101023	0.267995	0.813287	0.0803665	0.0482179	0.345591	0.50418	0.367615	0.416181	0.58137	1.18464	1.90857	0.989073	2.11833	1.30594	1.07603	0.324905	0.84203	1.36501
ENSG00000065809.13	FAM107B	275.439	8.32627	11.7958	1.41669	0.0383096	6.31082	10.4555	6.23325	6.41753	8.37064	6.63114	9.43	15.56	9.20818	9.17195	5.4185	12.1341	2.83497	3.47618	11.7413	6.57491	13.5651	12.9829	7.882	7.19318	8.52861	12.6487	16.7549	14.403	24.2382	6.15857	8.29038	12.8248
ENSG00000170322.14	NFRKB	281.399	8.57765	11.9642	1.39481	0.0397358	7.73842	9.73171	5.12788	10.0691	7.23625	6.84118	8.08231	13.7114	5.15191	6.79642	7.59347	14.2085	7.7926	9.18595	7.89765	4.92521	12.4724	12.207	24.7505	20.9999	12.7104	11.0811	9.34034	9.44335	11.9831	8.55832	8.35549	7.40707
ENSG00000111707.11	SUDS3	611.819	23.4911	20.1733	0.858765	0.0279796	20.8351	21.9243	18.2713	20.9947	26.8696	22.492	21.1478	23.1805	21.1316	27.3319	26.0811	24.3462	27.682	19.1243	29.4535	27.1697	14.5308	19.0449	17.7284	26.4294	21.2184	25.2719	18.9394	15.6579	18.7259	14.1904	26.3626	15.6832
ENSG00000027697.14	IFNGR1	943.746	38.5701	28.3072	0.733916	0.0175228	26.6603	39.0965	41.9934	33.0265	42.5485	32.6164	75.5018	27.7084	48.6213	36.7047	36.1946	28.8106	55.8113	23.9693	27.7883	25.9934	24.0897	33.3927	14.6821	13.5729	27.3653	59.8548	27.9875	28.1537	26.7195	20.8821	26.2613	37.739
ENSG00000162367.11	TAL1	24.502	0.809591	1.16601	1.44025	0.0417513	0.337877	0.455176	0.848808	0.662967	1.04901	0.58675	0.682231	0.653629	1.00315	0.503571	0.409955	1.27412	1.03013	0.57227	0.574228	0.478705	0.810274	0.493941	0.896993	1.75748	1.11199	0.6842	2.43302	1.15139	1.05815	1.67098	0.614988	0.69602
ENSG00000197912.15	SPG7	235.712	7.23248	10.0019	1.38292	0.0325158	7.64354	4.3438	5.00797	12.7111	5.41727	7.26024	4.84856	8.6736	5.97362	7.96384	6.68643	5.09728	5.28762	7.88852	12.1837	8.44103	4.2722	6.41679	12.0948	12.9422	21.2144	7.65374	8.55017	6.68765	11.3267	8.15922	11.3999	9.56655
ENSG00000163064.6	EN1	106.709	5.3181	2.28754	0.430143	0.16618	6.79458	12.8856	2.56256	5.91846	2.252	3.04201	7.07407	1.1803	12.4442	6.34636	0.474641	2.36394	0.150708	14.3769	0.405046	2.5281	1.32951	1.30075	6.4959	0.763646	1.13879	0.821397	2.05028	1.0933	0.792719	5.02657	4.43341	0.663637
ENSG00000007237.18	GAS7	115.119	3.34154	5.21506	1.56068	0.0531503	2.87758	3.38839	1.90243	2.22993	4.16984	2.74567	3.68979	7.63054	3.84844	1.38037	2.69655	5.03341	1.93787	2.77749	2.31478	1.64446	3.35575	4.19997	9.30673	2.43994	9.78529	5.76928	7.28654	9.77191	3.27415	3.39491	3.99134	2.27555
ENSG00000174175.16	SELP	57.2176	1.60248	2.76772	1.72715	0.176993	1.505	1.09742	1.20807	0.476424	1.19185	2.39576	1.64815	4.02612	1.84088	1.21409	1.1544	0.756707	2.02517	0.523406	1.47376	3.60326	1.28265	1.64034	1.76552	2.06668	2.42153	4.9738	6.19897	5.24369	3.45641	0.335891	1.45641	0.235193
ENSG00000107551.20	RASSF4	105.553	2.75556	5.15538	1.8709	0.0105732	2.43759	1.66798	1.99748	3.52342	2.59578	3.07191	1.615	8.80238	2.4937	1.23982	0.807388	4.03894	1.96117	1.47253	2.10835	2.0271	10.065	4.70185	2.5581	2.49358	6.2644	3.46818	15.3295	6.74913	2.89563	3.64747	2.99483	2.52512
ENSG00000166086.12	JAM3	76.6997	2.06788	3.72935	1.80346	0.0602922	0.642384	1.35991	2.21895	1.08147	2.76616	1.58501	1.56055	5.27261	3.38265	1.003	1.52256	2.78577	1.17692	1.72342	1.43681	1.89347	1.74671	3.35728	4.59364	0.845371	0.904391	2.96002	7.49679	4.09818	1.2591	9.86559	5.85204	2.30893
ENSG00000197857.13	ZNF44	147.011	4.37553	6.47521	1.47987	0.0588101	6.09507	4.03605	0.935095	5.03772	3.76024	4.04655	1.92479	5.26884	3.48741	2.6385	4.9721	4.13935	4.48506	3.87493	9.43117	7.2716	3.38803	5.23361	10.2526	9.81766	13.1688	7.14102	6.83381	5.47653	4.73541	2.3451	2.63153	4.58195
ENSG00000139438.5	FAM222A	40.8581	1.96234	1.09408	0.557538	0.0142119	2.39902	5.01229	0.798506	0.852844	1.00114	1.68482	0.631228	0.714993	1.44995	4.29661	1.21234	1.47821	2.19108	1.54245	2.66958	0.844666	0.458171	0.806868	0.810123	2.09935	1.32451	0.43145	0.943923	0.644275	0.726424	0.629908	2.87253	0.3308
ENSG00000102802.9	MEDAG	54.2642	1.47916	2.68283	1.81376	0.0396067	0.737497	0.312252	1.25191	1.01875	3.61376	0.704397	0.682518	2.24196	1.84026	0.633327	0.882481	2.68837	0.916056	1.53891	1.62493	0.699621	2.42436	1.46268	3.09248	1.01274	0.889969	3.80092	7.24372	3.88094	1.75215	4.99963	1.10745	1.21014
ENSG00000148824.18	MTG1	143.202	4.61065	5.91096	1.28202	0.0260539	4.01897	2.92653	3.46008	3.98654	3.63981	4.526	4.62942	7.3045	3.07506	4.43929	3.34509	3.60075	7.22251	4.20587	7.27926	6.59087	4.35525	3.59811	5.31439	9.24706	8.77103	5.52746	5.19282	6.37985	6.60256	4.15085	5.43578	4.37639
ENSG00000126264.9	HCST	48.1102	1.35461	2.35316	1.73715	0.0396927	0.571229	1.41082	1.57853	1.23292	0.565463	0.909319	0.792968	3.12572	1.04807	0.668924	1.18303	3.59014	0	0.425702	1.71626	1.25796	5.79566	2.90886	0.641594	0.98052	3.06367	2.74442	1.50823	2.88245	3.73212	1.19521	0.571849	2.00854
ENSG00000179148.9	ALOXE3	54.7812	2.83322	1.16022	0.409507	0.12837	2.93355	0.624311	9.39333	3.4171	7.28289	3.29852	4.37394	0.226485	0.854345	4.32589	0.900066	0.7609	0.0289191	1.76978	0.808326	0.899233	0.264566	1.44767	2.47554	0.159856	1.12382	0.752492	0.540959	1.54406	1.71473	1.05223	1.77136	0.036384
ENSG00000162073.13	PAQR4	215.833	8.94875	6.49244	0.725514	0.0315184	6.00886	12.3465	7.88383	11.1892	9.88451	6.00175	5.58817	18.6965	7.41475	5.61083	4.17527	9.47836	10.7565	7.90241	9.7938	7.04549	7.00506	5.58925	6.13148	12.6063	6.63504	4.78577	7.27941	6.20009	5.5984	5.27556	5.54359	3.40629
ENSG00000186364.11	NUDT17	46.0633	1.40707	2.13517	1.51745	0.0458092	2.2189	0.820173	0.333698	1.1859	0.993655	1.2615	1.02674	2.18421	0.853005	1.73226	0.389027	2.25787	2.03429	0.551203	1.76367	1.32454	0.857631	1.6425	4.19327	3.99013	1.84176	2.81511	2.56664	1.59953	1.63171	0.707458	1.05777	2.22915
ENSG00000076321.10	KLHL20	214.569	7.03837	8.59952	1.22181	0.0492065	8.02561	5.48908	4.69555	4.335	5.92789	6.51887	7.08452	7.63204	7.74767	7.51856	6.95154	11.071	6.41578	6.22636	8.4361	10.3604	5.12784	7.08168	8.25918	5.7459	7.11878	9.76091	8.82385	6.64576	11.3915	7.3025	11.3304	11.545
ENSG00000180875.4	GREM2	22.8657	0.663628	1.20856	1.82114	0.104556	0.461846	0.770322	0.198899	0.108746	0.519527	0.133672	0.213708	1.45505	0.770345	0.196667	0.328493	1.47773	0.704045	0.75095	0.364425	0.611671	0.323751	1.23781	1.91776	0.288278	0.900735	2.87907	2.03977	1.9673	0.498755	1.33531	0.378284	0.0328067
ENSG00000151702.16	FLI1	117.177	3.15762	5.58557	1.76892	0.0350623	2.20673	1.22459	3.29009	2.55257	3.76447	3.10356	2.09179	8.05004	3.84443	1.78966	2.03119	4.47045	2.15556	2.02773	3.26142	3.25914	12.7728	4.90375	1.9251	1.88781	4.56754	7.89772	14.1194	7.90744	3.2831	3.24551	2.83111	2.71197
ENSG00000221883.3	ARIH2OS	10.7171	0.40627	0.571005	1.40548	0.0229335	0.654919	0	0.129272	0.282712	0.162077	0.173757	0.050508	0.663642	0.320433	0.0852141	0.502352	0.411613	0.338952	0.16269	0.655902	0.406793	0.354388	0.468074	0.65386	0.499633	0.292711	0.715113	0.806962	0.472108	0.388991	0.456771	0.437087	0.170579
ENSG00000092841.18	MYL6	1468.11	56.6551	47.7757	0.843272	0.0551657	38.7847	40.021	59.4297	61.5252	58.5486	53.6369	69.9235	53.7899	88.4735	72.6863	56.4513	42.1147	38.0068	59.3646	55.5695	57.8249	50.6124	46.7921	43.3489	54.0332	42.2242	42.9218	44.5324	53.0691	42.282	49.5647	37.1915	55.3865
ENSG00000064201.15	TSPAN32	18.8214	0.495298	1.09169	2.2041	0.0102627	0.55391	0.0325726	0.23689	0.717326	0.274159	0.624573	0.256309	1.6558	0.220197	0.108107	0.191193	0.232086	0.315343	0.171998	0.339009	0.297137	0.917923	0.494853	0.311071	0.686683	2.72322	1.67334	2.63251	1.63045	0.328997	0.270426	0.60072	0.324607
ENSG00000196419.12	XRCC6	1999.54	79.1529	62.6958	0.792085	0.0516992	64.9634	76.0526	89.5917	45.0067	54.556	101.336	112.677	61.9653	89.7852	95.5288	102.854	75.835	72.5237	98.2153	44.9027	87.4613	77.9917	74.8108	55.8207	40.5825	28.4161	65.399	50.7826	57.7695	56.423	72.9542	50.4279	94.9057
ENSG00000146197.8	SCUBE3	62.0623	3.38736	1.08092	0.319105	0.04423	7.99721	10.6316	0.140941	0.390426	0.365195	6.15685	0.693847	5.19506	0.506568	3.86489	0.372434	3.47047	2.83813	6.22589	0.460847	1.08056	0.280123	2.00303	0.392085	0.08171	1.14888	0.540567	3.49408	0.274519	0.113094	0.358562	2.66863	0.316159
ENSG00000146530.13	VWDE	42.8414	2.45511	0.67806	0.276183	0.0629176	2.53023	0.0920351	0	8.71537	0.516431	7.8272	0.675929	4.36133	0.325445	0.692378	0.648268	5.3445	0.113402	3.18807	0.296072	1.36983	0	0.0699113	0.0781281	0.567149	0.139901	0.250645	1.76314	0.150429	0.43381	0.0218314	0.835622	1.83438
ENSG00000165185.14	KIAA1958	58.9809	1.87049	2.59412	1.38686	0.0854699	2.97608	1.98709	0.579533	1.77438	0.647336	2.27316	2.02553	2.09342	1.61119	2.18794	1.67063	1.69431	2.27932	2.4367	0.320777	1.97591	0.666189	2.68978	2.2984	4.27615	2.41572	2.28493	1.81823	1.59699	4.01091	1.53022	3.36676	3.49336
ENSG00000154553.14	PDLIM3	72.0328	2.13718	3.29039	1.53959	0.0632844	1.42109	0.59626	3.04004	0.44765	2.11962	3.2557	0.879727	2.75549	2.48052	3.08838	0.680537	2.1001	0.930284	4.60829	2.15406	4.21608	0.685842	3.35579	3.06286	1.40645	4.22284	1.62719	4.66482	2.97633	1.45999	5.43248	2.42231	5.94213
ENSG00000168309.17	FAM107A	17.0709	0.399435	1.06765	2.67289	0.00244574	0.197423	0.20897	0.376696	0.0284075	0.504862	0.602354	0.152255	0.660175	0.301855	0.179813	0.106003	0.537678	0.163482	0.098085	0.373471	0.724612	0.360548	0.582036	0.615951	0.376533	0.926487	2.67305	2.15456	1.58919	1.56347	0.0826155	0.724672	0.205682
ENSG00000186166.8	CCDC84	291.232	9.01382	12.2173	1.3554	0.0247621	8.05959	3.89642	6.26862	14.7159	8.08008	10.0181	8.47443	13.9081	5.3109	7.57716	6.86604	17.7181	6.09177	8.63887	8.08313	7.11117	10.1189	9.50438	22.3677	15.0314	13.4736	11.8486	13.4019	9.81497	7.90367	14.7537	14.5573	7.63744
ENSG00000172260.14	NEGR1	6.02952	0.2593	0.380001	1.46548	0.0398053	0.0783597	0.0737269	0.10827	0.0902023	0.23917	0.0727639	0.13295	0.24615	0.416938	0.0917613	0.0961686	0.246243	0.0892209	0.145992	0.261591	0.194688	0.095404	0.497036	0.176024	0.11956	0.140089	0.302318	0.551722	0.141217	0.15514	0.142095	0.614484	0.510234
ENSG00000154822.17	PLCL2	88.3469	2.60315	4.00767	1.53954	0.0345082	1.25885	1.27245	1.74606	3.14297	2.86275	2.46427	1.55858	6.45391	2.74665	2.01864	1.65977	3.84897	2.47223	1.72415	2.31703	2.96243	4.21137	3.84806	1.68141	1.98562	6.5691	6.04801	8.69571	4.41466	1.89955	3.21767	3.6444	1.62166
ENSG00000185896.10	LAMP1	856.271	33.7392	27.1525	0.804776	0.0689283	33.5886	31.9472	35.215	16.962	36.194	25.3016	25.918	31.2908	38.4092	30.4376	36.1819	50.3501	48.106	20.8937	43.7928	32.1861	27.5726	29.9257	30.8616	14.6276	12.7215	33.4446	27.8057	31.778	31.7824	28.903	25.5929	24.4812
ENSG00000185669.5	SNAI3	19.9834	0.607945	1.0511	1.72893	0.0581921	0.909778	0	0.279342	0.698182	0.600396	0.482748	0.327427	1.41357	0.55641	0.552416	0.0930454	0.381193	0.753366	0.301334	0.269968	0.582219	0.61537	0.541853	0.151385	0.578386	1.89755	1.32453	2.24198	2.11322	0.96065	0.253809	0.708373	0.394931
ENSG00000011600.11	TYROBP	544.047	15.1088	24.6319	1.6303	0.104796	9.84473	17.4356	13.9454	10.3326	14.618	12.445	16.9711	25.1157	25.5712	9.7954	14.8362	23.7788	12.9476	8.34366	9.15065	11.5758	61.4189	30.5242	6.21528	7.73137	10.8706	25.2088	44.6474	36.5968	19.2617	31.9883	13.7203	19.1556
ENSG00000102096.9	PIM2	561.134	15.442	25.5618	1.65534	0.06384	19.9115	10.7394	6.48365	16.9168	14.2807	43.1536	8.39198	28.6843	16.9168	11.1386	7.76297	10.4418	9.92446	5.10379	20.2801	24.7068	24.9374	18.8989	3.75111	15.9644	35.7955	42.7631	61.3463	26.1471	25.7622	27.0137	16.1877	7.7296
ENSG00000127419.16	TMEM175	109.534	3.37409	4.74793	1.40717	0.0341585	2.80285	1.67095	2.38467	4.33902	3.65955	2.03856	1.7889	5.34738	2.87275	2.90495	4.98187	5.77068	2.88122	2.3769	3.29104	3.24177	3.0791	2.25362	5.42778	6.58074	9.78412	3.75699	5.20584	6.68848	3.96099	4.20628	2.61239	3.62495
ENSG00000181513.14	ACBD4	60.7115	1.78163	2.82977	1.58831	0.0194366	2.78202	0.229035	0.842	1.88145	1.26222	1.4762	0.514925	5.32805	1.02087	1.26693	1.3017	2.0399	2.93725	1.38218	0.959689	1.49237	0.865604	2.03803	3.81909	2.17544	5.5953	3.17948	4.70109	2.03888	1.59731	2.87166	3.15638	1.95641
ENSG00000188282.12	RUFY4	32.3633	0.748116	1.84166	2.46173	0.058082	0.361656	0.567124	0.9994	1.17955	0.119335	0.671659	0.130159	1.7835	0.516097	0.690162	0.073975	1.31328	0.798611	0.329413	0.187807	0.544575	3.34318	1.44317	0.150446	0.643778	6.89661	1.73754	3.69225	1.79597	0.190939	1.37889	0.321821	0.502379
ENSG00000112936.18	C7	15.0303	0.273302	1.05621	3.86464	0.0028489	0.0670426	0.0709637	0.0264665	0.0578811	0.132732	0.0533614	0.26369	0.30571	0.0984059	0.0523391	0.123419	0	0.478829	0.174869	0.693813	1.12435	0.0544168	0.592957	0.150602	0.383598	1.88774	3.05995	3.18626	0.990736	0.557482	0.0841656	0.201346	0.157156
ENSG00000092621.12	PHGDH	138.747	6.22998	3.69976	0.593864	0.0568499	6.43948	5.20089	5.4142	3.09955	1.9932	9.08661	3.13793	6.54835	8.61549	8.55662	1.05781	2.60261	13.5315	12.1885	4.47699	9.46691	0.377746	3.17683	3.82615	5.82561	2.67432	4.90327	3.65125	2.08137	0.609252	2.32111	3.72716	4.15592
ENSG00000124126.13	PREX1	246.904	7.17595	10.928	1.52287	0.0349308	5.51793	3.19189	5.74964	11.5315	6.75159	7.40779	6.89279	17.0622	7.35192	6.82216	4.34875	7.94808	4.20647	4.28866	7.06786	6.78789	12.3599	9.46994	6.2065	6.99189	19.2427	12.4225	19.8841	21.0151	4.97938	9.03811	7.44425	4.9222
ENSG00000122870.11	BICC1	128.206	3.61484	5.9064	1.63393	0.0215789	2.10557	1.03442	5.02939	2.11697	5.76483	2.48201	1.78827	9.28525	5.164	1.39409	1.55782	7.40397	1.22491	4.44923	1.92188	2.73608	5.52732	7.25761	3.71204	4.14797	2.60878	4.93577	11.9914	6.30186	1.80467	11.6887	7.04395	5.72707
ENSG00000198189.10	HSD17B11	158.015	4.92098	6.69231	1.35995	0.196546	3.3075	6.34229	2.15725	4.34536	5.6941	5.15063	4.39177	8.00001	5.64633	3.31184	3.37531	5.42281	3.75105	5.46559	5.95283	8.06333	9.30861	8.01666	1.07679	4.60771	3.75992	8.51056	8.42914	4.2502	5.38102	5.83722	11.6608	6.79806
ENSG00000150764.13	DIXDC1	53.0391	1.67078	2.36749	1.41699	0.0317182	1.09053	1.19061	1.24279	1.58102	1.55818	1.37568	1.14253	3.05246	2.4539	0.562219	1.26893	3.46576	0.817851	1.56407	1.1952	1.19207	3.44877	2.4044	1.86426	1.81304	1.26909	2.29166	3.8464	1.89857	0.953255	1.99762	3.08976	3.40844
ENSG00000155115.6	GTF3C6	645.156	25.821	20.0493	0.776474	0.0648626	24.9414	31.1475	23.7084	15.7248	11.289	28.8632	27.0303	17.8578	37.5124	36.5087	19.9367	32.3823	32.4068	22.6226	23.8832	6.05965	24.9724	25.5951	15.727	14.4585	11.6607	21.4286	24.2618	26.6141	22.8058	16.0677	21.3546	28.3352
ENSG00000167483.17	FAM129C	23.8528	0.578245	1.38301	2.39174	0.0505035	0.607556	0.316885	0.312842	0.638561	0.248414	0.672798	0.268909	1.44543	0.242331	0.639286	0.194514	0.531263	0.426544	0.275601	0.352735	0.340084	0.343053	0.750451	0.652726	0.513881	4.49815	1.49985	2.65033	3.73223	0.878615	0.154756	0.396662	0.268324
ENSG00000185219.16	ZNF445	109.509	3.63088	4.44965	1.2255	0.0473057	3.44207	3.03125	2.2049	3.36419	4.35329	3.7218	2.28822	5.35315	3.35346	2.06427	3.3049	4.40828	3.73958	3.83046	4.5034	2.63411	2.80137	4.3764	5.09224	5.01121	4.86402	4.1049	6.85903	3.72524	4.00069	3.88247	5.42413	3.7697
ENSG00000161526.14	SAP30BP	308.974	10.0716	12.3616	1.22737	0.0496586	8.76679	7.00822	10.2071	14.7171	10.3238	10.5004	8.71096	9.08955	11.1896	10.3984	5.78893	15.5448	9.73205	9.04253	8.55373	14.2986	12.8136	12.6903	16.7917	16.7688	16.0989	10.5992	9.8851	12.2424	7.11884	12.8136	8.54312	8.73639
ENSG00000122188.12	LAX1	195.334	5.28864	9.13882	1.72801	0.0483499	6.84341	2.8202	3.54447	7.32622	5.79882	11.8089	2.10264	11.65	7.09165	2.39346	1.68814	3.7161	2.58409	1.22399	7.23748	11.5	8.8874	9.8016	2.0907	2.63128	8.29494	22.453	18.7338	8.64291	5.78808	10.2179	5.42586	3.03724
ENSG00000268089.2	GABRQ	80.3676	4.63075	1.05433	0.22768	0.0159957	1.41835	2.10184	0.638315	0.710229	1.55848	0.767662	1.96893	0.948582	1.71755	2.87895	14.8047	32.6262	1.32132	0.655347	3.84478	1.66267	0.0460497	0.349728	0.658469	0.259693	0.380353	0.4832	1.58785	0.715709	2.19033	0.878434	1.22111	1.97271
ENSG00000164896.19	FASTK	261.473	7.76164	11.373	1.46528	0.0431778	12.8378	8.86428	6.63017	5.87941	6.10358	5.20057	5.57842	8.30883	5.77461	10.2019	6.20477	6.59359	9.63048	9.19001	7.92622	9.86812	6.25581	7.1774	17.744	25.0639	21.2235	10.0485	11.8575	9.28747	6.06724	7.31699	8.70601	5.93237
ENSG00000038358.14	EDC4	224.541	7.05551	9.34677	1.32475	0.0447754	6.60846	6.28447	5.21766	10.7986	8.73169	5.10187	5.59085	9.53602	5.59934	6.93049	5.9392	6.7381	4.66791	7.27106	9.31686	9.53237	4.86897	5.8684	13.953	13.8913	17.3413	7.3707	7.45869	7.83063	10.5456	6.62279	7.21189	7.71226
ENSG00000180346.3	TIGD2	128.929	4.07889	5.42659	1.33041	0.039248	3.15659	1.88183	3.26572	4.88662	2.5321	2.94561	6.04401	4.56632	2.33661	4.33376	4.15786	4.99394	6.32067	2.92023	5.34155	3.30056	3.84319	4.52178	4.84948	3.86133	4.37838	9.24669	5.23058	3.41321	7.69341	3.91724	7.84555	7.14425
ENSG00000169550.13	MUC15	85.9697	3.87973	2.35183	0.606184	0.0508128	6.94222	5.07255	2.23523	1.53027	6.06795	4.19314	5.39947	2.39478	0.451679	2.76749	4.32797	8.04551	2.2322	2.89869	2.13674	2.53552	1.33877	2.55999	4.46091	2.87345	2.70667	3.78476	0.259997	4.75595	2.33949	0.206035	1.18294	0.269299
ENSG00000153982.10	GDPD1	22.2119	0.745137	1.06422	1.42822	0.0802521	0.707401	0.457585	0.302533	0.254472	0.641905	0.938405	0.218222	0.716823	0.173055	0.966449	0.786782	0.740995	1.02512	0.527182	1.22013	0.579198	0.215317	1.54835	1.14767	1.1468	1.10658	1.05564	1.86777	0.382455	0.910353	0.493375	1.29831	0.783053
ENSG00000154781.15	CCDC174	287.708	9.56978	11.3047	1.18129	0.037044	7.38534	7.29613	7.21105	9.7342	14.1098	10.4632	9.50034	11.7644	8.49156	11.8387	10.1062	10.7686	6.54372	6.97152	9.86189	10.6592	8.87185	14.1459	11.8712	11.8882	12.8732	11.9349	15.5998	9.12149	10.2353	10.343	10.1535	7.96356
ENSG00000156875.13	MFSD14A	97.222	3.05062	4.17405	1.36826	0.0532821	3.45047	4.36595	3.21749	4.00618	3.38619	4.35627	3.19325	2.13403	1.7246	2.50795	2.62841	1.7947	2.66021	2.17241	2.66125	6.71181	2.84895	3.18888	4.81097	7.48856	6.85996	4.39121	2.95302	2.61598	2.82678	3.38573	1.90577	2.97501
ENSG00000110799.13	VWF	384.835	11.9965	15.976	1.33173	0.0561689	14.4062	5.01753	14.1347	9.13543	12.8764	12.1369	8.45156	19.4436	17.2751	16.9818	10.3135	7.89993	8.48665	8.6014	13.286	17.1942	8.62285	15.2095	18.0165	16.4663	17.5314	17.743	27.2444	24.9967	12.4896	9.32132	13.9158	7.63606
ENSG00000283632.2	EXOC3L2	52.8267	1.71968	2.29473	1.3344	0.0694241	1.29953	1.00039	1.98211	1.73391	1.28641	1.92763	1.42131	2.26256	1.73406	2.25961	1.63112	0.593996	1.46742	2.15702	1.53811	2.10134	1.05479	1.55148	1.81345	2.36584	3.64328	2.03815	3.43118	3.74713	2.66642	1.33481	1.53747	1.24619
ENSG00000173757.9	STAT5B	282.74	9.05228	11.5197	1.27257	0.049767	13.5514	2.68291	4.03103	11.9575	9.30149	10.6779	8.44455	13.5062	10.354	11.4486	7.58654	7.16858	9.2089	5.78821	8.57639	7.93113	9.09263	12.257	7.91027	14.2332	16.0581	12.7508	15.9469	11.4914	10.4845	7.88688	13.267	9.14573
ENSG00000178057.14	NDUFAF3	89.0069	3.02028	3.57713	1.18437	0.0382938	2.87727	3.45162	2.15814	2.29778	2.34978	2.69088	2.09693	4.15471	2.66595	2.69548	3.87327	3.43586	2.09967	3.16277	3.79409	3.82617	2.68572	2.73758	3.01625	4.93886	3.85791	3.73865	3.64653	3.68156	4.18696	3.61214	2.52034	2.75407
ENSG00000176108.9	CHMP6	255.934	7.36555	11.4039	1.54828	0.0548143	9.42366	4.60825	7.40775	13.988	7.2828	6.2505	4.74308	7.79012	4.94439	7.87318	5.47834	8.83212	6.57138	6.28362	7.50609	13.051	7.21283	8.286	17.2075	22.7975	27.0444	7.1487	5.93666	9.71306	6.97197	9.33988	8.68911	3.55251
ENSG00000150045.11	KLRF1	15.3186	0.445564	0.879626	1.97418	0.180482	0.555815	0.0980539	0.32913	0	0.0687755	0.552989	0.642975	0.253448	0.101979	1.08479	0.319751	0.174663	0.258895	0	0.742199	0.282466	1.07146	0.595866	0	0	0.745251	2.48829	1.32078	1.10183	0.660256	0.348886	0	1.52004
ENSG00000111679.16	PTPN6	298.947	9.49514	12.2554	1.2907	0.0385803	9.64715	7.42422	6.62333	10.4111	8.33874	6.81604	7.53702	14.3447	6.81075	10.151	6.45069	7.90848	15.8686	11.9303	10.6651	10.3975	13.6606	11.6726	12.1441	13.5595	21.8398	14.5489	14.8031	13.8834	7.68146	7.89853	8.74784	7.18296
ENSG00000198300.13	PEG3	16.683	0.387491	1.05159	2.71385	0.00601884	0.286755	1.26469	0.0990522	0.0928384	0.443531	0.242502	0.0912237	0.414068	0.295947	0.0699578	0.18971	0.382975	0.0445228	0.227057	0.167525	0.485764	0.232752	0.518767	0.509956	4.24538	0.96122	0.602738	0.624631	3.02315	0.383218	0.299994	0.287066	0.196054
ENSG00000134765.9	DSC1	165.107	10.2825	1.05151	0.102262	0.0104035	66.6139	1.41743	2.13614	12.1038	30.3736	15.6287	13.297	0.274158	0.887511	3.23227	0.565984	0.97903	0.28005	4.6741	0.273698	1.55551	0.0665462	0.395523	0.828769	0.23455	0.164894	1.48606	0.259765	0.0886515	1.50958	0.926334	4.30895	0.544525
ENSG00000086598.10	TMED2	1902.54	75.7665	59.1419	0.780581	0.0369408	56.6844	58.6772	68.0886	46.9651	92.4041	77.0991	97.091	51.0006	95.7495	93.6442	122.465	74.4694	71.9417	56.6879	72.0301	84.7796	74.8579	50.9185	34.0241	43	23.3528	83.6572	47.4102	49.2648	61.7426	56.5469	89.6952	68.2948
ENSG00000198874.12	TYW1	358.98	11.0184	15.1156	1.37185	0.0738246	11.297	8.19418	8.52861	13.367	9.91322	11.1769	14.0787	13.7644	10.0086	15.9874	10.8334	6.95869	6.3173	10.6998	12.6512	21.3026	8.29277	17.6841	25.7817	22.3015	26.9756	13.0332	9.60199	12.1019	8.01982	8.09883	10.2279	11.7813
ENSG00000054793.13	ATP9A	362.213	15.0713	10.688	0.70916	0.12891	14.7568	3.25321	10.9364	11.9224	6.88714	9.01431	19.8032	16.1778	14.986	17.9297	11.7325	28.9218	21.2059	11.5464	25.496	10.4486	5.14308	12.5929	10.8133	4.19159	15.2984	13.4054	9.47114	9.5754	11.8532	10.483	11.2745	13.0932
ENSG00000139618.14	BRCA2	216.624	8.79365	6.73225	0.765581	0.0408029	12.782	8.37544	5.95265	8.0671	6.47475	12.9895	6.12579	11.2927	10.3021	8.48634	11.89	9.30654	4.19067	7.83525	6.33391	8.40977	7.54374	9.87963	4.33685	3.81998	5.04971	6.04378	6.56894	3.02337	5.84644	5.33691	9.98248	10.3776
ENSG00000170476.15	MZB1	240.565	5.89785	11.9152	2.02026	0.093302	8.62699	1.57628	1.9157	8.44561	6.2143	15.6336	3.2078	13.2533	7.43374	1.80401	2.48148	3.09829	3.54002	1.14806	8.58851	21.1122	8.59659	9.82667	1.09586	4.75982	17.1444	34.5172	24.9746	8.49545	9.42455	9.28317	2.62175	1.74541
ENSG00000198178.10	CLEC4C	16.2416	0.368565	1.03947	2.82032	0.0171354	0.225766	0.0796569	0.133689	0.292372	0	0.179695	0	1.57853	0.662765	0.264378	0	0.141893	0	0.16825	0.301473	0.382449	0.962057	0.484069	0.169051	0	1.51357	2.46517	3.21893	1.38335	0.804567	0.377904	0.452022	0
ENSG00000148180.19	GSN	541.714	16.4478	22.9075	1.39274	0.0375391	25.6632	13.4335	13.2112	22.9931	13.1897	22.7028	10.3236	21.3998	17.2075	24.3768	6.32595	15.5799	5.41804	22.5594	10.8324	17.5617	18.2054	20.8515	44.9649	38.2776	20.3263	21.425	24.3011	29.2444	16.9322	12.0891	18.0394	14.2789
ENSG00000114767.6	RRP9	194.104	5.24124	9.09884	1.73601	0.0499319	4.21616	4.61934	4.77426	8.90846	4.72276	4.50381	4.87732	5.32915	4.43783	6.14989	8.52751	3.34716	3.92772	2.48056	6.2967	6.91666	7.06945	4.93628	12.4619	26.6629	18.5959	3.63448	2.57795	7.75817	6.45821	10.8646	4.88717	4.16134
ENSG00000187800.13	PEAR1	58.8956	1.79144	2.67876	1.49531	0.0522561	1.678	0.781949	2.18725	2.76072	2.805	1.05838	1.21596	1.94417	1.40576	1.01339	1.3551	3.22353	1.49438	1.17972	1.26831	0.879577	6.09041	2.29107	1.51724	2.24627	3.05647	2.35078	3.71157	3.24084	1.1659	3.84217	1.86999	1.26166
ENSG00000073111.13	MCM2	384.721	15.2013	12.2693	0.807117	0.0259425	15.6795	15.9034	11.5759	16.1887	11.4906	12.3945	13.1389	19.066	15.7799	11.934	14.9089	12.4359	18.7437	19.7766	17.5034	9.87421	14.9299	9.24704	19.8173	14.7547	8.95533	9.21939	6.5635	5.87024	9.88566	15.6636	17.4843	15.9353
ENSG00000158887.15	MPZ	39.5156	1.19447	1.87681	1.57125	0.012008	2.19462	1.20451	0.577581	0.842097	0.603462	1.42329	0.714616	2.07559	0.805321	0.761468	0.785573	1.43039	1.16106	0.969193	0.868311	1.01892	1.15456	1.39423	1.03467	1.9533	2.50666	5.25417	1.45936	1.87499	1.738	1.02042	1.54604	1.14321
ENSG00000095319.14	NUP188	377.852	11.9413	15.5024	1.29822	0.0343761	11.7795	14.7041	11.9565	15.7341	11.9624	15.2854	7.94935	10.3258	12.64	13.7346	8.7181	16.011	6.30157	10.385	10.1327	14.6506	12.0972	19.1993	21.2602	31.32	11.6487	13.1427	10.3941	12.384	13.1136	10.6059	14.3208	16.0946
ENSG00000185697.16	MYBL1	52.8383	1.6129	2.41883	1.49968	0.0306657	0.604648	1.72376	1.50857	1.10668	2.19067	0.731513	1.64514	3.45563	2.09452	1.37835	1.61399	1.33766	1.20167	1.09948	1.00118	1.13899	5.70283	1.65944	1.21338	2.32486	2.72404	1.62678	2.7587	1.48195	1.14922	2.99582	1.81591	3.55286
ENSG00000204084.12	INPP5B	128.318	4.14337	5.30517	1.2804	0.0189947	4.07805	3.29277	3.87769	3.0299	3.51286	4.13534	2.87589	8.58261	4.50375	3.64285	3.55515	2.56303	3.62859	3.38979	5.98226	4.6697	4.21714	3.96204	4.93273	6.14745	8.2808	6.83344	6.39833	5.83704	5.03066	4.16788	3.51329	3.6767
ENSG00000203710.11	CR1	17.6531	0.463153	1.03891	2.24311	0.0120137	0.306111	0.0392745	0.219716	0.312331	0.606042	0.708782	0.354114	0.871347	0.163387	0.184663	0.313779	0.419758	0.224679	0.16591	0.557401	0.702405	0.649392	0.64888	0.3334	0.493598	1.1567	0.808268	2.35123	3.72121	0.528919	0.267841	0.348231	0.195698
ENSG00000124102.4	PI3	8846.77	460.752	149.099	0.323599	0.223392	258.223	144.746	1416.48	502.72	1418.65	259.144	1344.26	140.394	51.8873	663.282	464.89	35.4715	3.20366	175.025	31.402	503.842	49.9969	117.108	109.514	60.4184	218.48	181.83	2.56374	157.708	120.751	109.709	262.148	42.9142
ENSG00000132334.16	PTPRE	216.082	6.59391	9.22871	1.39958	0.0288049	7.40221	4.38768	14.2356	7.46701	10.8755	6.78471	6.38168	7.80715	5.13517	5.96127	2.82576	4.68163	5.1779	4.52926	3.75608	8.31031	18.6317	6.94991	6.53453	3.58442	8.85943	8.61685	10.9942	13.4242	9.08932	9.39059	6.56781	7.71996
ENSG00000186222.4	BLOC1S4	63.9011	1.99306	2.83116	1.42051	0.039442	0.866205	0.611245	1.96623	2.80439	1.8221	2.06832	2.20449	1.44827	1.31116	1.18341	1.99325	3.67473	2.75706	1.37175	2.31335	2.64124	2.15317	1.21882	1.62151	5.20397	4.06501	1.89164	2.40142	2.49767	1.8007	2.35612	2.49304	5.16082
ENSG00000134061.5	CD180	29.1906	0.856445	1.47261	1.71944	0.141548	1.05024	0.523138	0.463383	0.506699	0.65742	1.52433	0.343041	1.65269	1.15617	0.313494	0.270107	0.660071	0.940024	0.0690601	1.21681	1.15119	1.32883	1.85446	0.0925187	0.141392	1.03544	1.7269	3.81694	2.58299	1.46775	1.44774	0.618461	0.579269
ENSG00000150783.9	TEX12	18.3774	0.513064	1.03704	2.02126	0.0133637	0.303172	0	0.359051	0.392614	0.450167	0	0.140286	1.10595	0.278124	0.355022	0.279056	0	1.31801	0	1.21451	0.719004	0.430635	0.893799	1.58908	1.21426	1.626	0.860695	1.12066	0.76491	0	0.634339	1.97276	0.355335
ENSG00000108784.9	NAGLU	92.7677	2.96742	3.92742	1.32351	0.0340198	3.08899	2.09752	2.00173	4.9312	3.08666	2.27307	1.88783	3.75616	3.74274	2.73003	3.91621	1.46522	3.07675	2.3889	2.56829	2.60651	2.36534	3.4053	3.97137	7.40319	5.86104	3.99657	4.98591	3.27709	3.39249	2.63407	3.034	2.82352
ENSG00000160117.14	ANKLE1	14.3002	0.422539	0.827857	1.95924	0.0357501	0.441506	0.138468	0.116196	0.211763	0.267086	0.234273	0.113498	0.626341	0.288021	0.306379	0.22577	0.678294	0.121867	0.51182	0.556805	0.132962	0.199089	0.210365	0.844852	2.80685	0.723535	0.257112	1.08801	0.424355	0.40792	1.06748	1.0313	0.268318
ENSG00000154263.17	ABCA10	70.5012	1.87817	3.47144	1.84831	0.089272	1.0207	1.60223	0.312487	3.09327	0.701093	1.35954	0.751834	5.16726	1.12365	1.8051	0.834054	4.52981	1.66888	0.978	1.72459	2.56185	1.18354	3.11527	1.57537	5.05352	4.41299	8.39754	7.14998	1.98212	2.20229	0.66249	5.25502	0.2767
ENSG00000178104.19	PDE4DIP	69.3582	2.26143	2.94128	1.30063	0.0557693	1.47048	2.27658	1.83659	1.83863	2.5599	2.08856	1.311	3.69946	2.38631	1.44982	1.64229	2.57338	1.47222	2.65934	3.15696	2.08299	3.42374	3.19024	1.53296	1.95109	3.53538	3.04239	5.21466	2.81452	1.29503	3.12448	2.65861	3.07057
ENSG00000138964.16	PARVG	67.3093	1.77801	3.34147	1.87933	0.0142982	1.15292	0.842112	1.35743	1.57164	1.00112	1.28792	0.973377	5.79218	1.78876	0.631624	0.707472	4.09336	1.30644	1.07023	1.59355	1.52817	3.25887	2.98157	1.19649	1.71281	7.0513	2.79163	8.7157	6.08013	2.2826	1.11727	1.98436	1.43821
ENSG00000154222.14	CC2D1B	193.06	6.19361	7.91964	1.27868	0.0344895	4.83548	4.99466	5.8005	7.42169	7.7581	6.93512	5.16679	8.50733	6.56611	3.8844	5.86994	4.16954	6.90571	5.8667	6.72212	5.99114	6.95853	5.55956	7.27648	12.9113	14.8777	7.4888	7.37665	8.13336	5.77185	7.09689	5.33181	6.88127
ENSG00000170515.13	PA2G4	714.726	27.4806	23.486	0.854637	0.065495	18.1771	36.1365	28.5029	28.8771	25.6204	31.2856	27.3465	17.1663	32.5381	33.6036	31.233	27.0818	26.1883	18.4285	28.5233	31.558	29.1896	23.4931	18.4471	23.6517	18.4339	20.3112	19.9771	20.6858	27.4019	21.1593	25.4479	24.2606
ENSG00000124260.11	MAGEA10	106.145	6.37185	1.02828	0.161379	0.00196978	0.0603938	0	0	5.31837	19.9081	0.336486	1.20167	3.41486	0.354587	7.73235	8.69979	21.3319	3.48825	11.747	10.484	7.7549	0	0	0	0	0	0.448424	3.76325	0	0	0.101092	0	0
ENSG00000114737.15	CISH	75.5168	2.33448	3.33074	1.42676	0.0496578	1.60971	2.00596	1.96049	4.40577	2.15287	1.71738	1.23614	3.51912	2.80263	2.27271	1.07184	2.02339	2.33978	1.40381	2.99558	1.56649	6.07413	3.13931	1.74388	1.80286	4.63814	3.11143	5.78747	4.69091	2.88862	2.69445	1.98861	1.87329
ENSG00000213203.2	GIMAP1	30.5285	0.827163	1.60931	1.94558	0.0370408	0.361291	0.305938	0.812976	0.810992	0.661641	0.776421	0.31764	2.57004	0.954554	0.366671	0.282669	0.726622	0.493642	0.646195	0.820156	0.489623	2.08208	1.33627	0.405796	0.62016	1.6955	2.14607	4.99859	2.86486	1.28754	0.423329	0.904208	0.366994
ENSG00000166004.14	CEP295	348.78	10.5374	14.8861	1.41269	0.0482329	8.48211	8.06737	14.7334	11.5258	7.20089	9.40763	11.331	10.7737	8.96545	8.14775	11.3292	18.3802	6.53904	12.2713	9.40588	9.02106	15.0715	12.6911	33.3857	16.1422	19.9028	12.1369	11.7041	8.70644	6.28651	23.6427	14.0476	9.48047
ENSG00000154144.12	TBRG1	223.053	7.00317	9.29272	1.32693	0.0328067	4.86118	5.76072	4.45346	5.976	6.06744	7.92759	4.86554	11.3725	6.10766	5.30069	4.54744	14.8112	6.49757	7.16672	7.83189	4.96777	9.90714	10.5929	13.0565	10.642	7.72241	11.4468	14.3698	9.77	5.86878	8.07066	8.38406	4.7067
ENSG00000162511.7	LAPTM5	583.514	16.505	26.0569	1.57873	0.0520265	8.07494	21.2077	13.4899	14.7278	16.278	13.067	12.2487	36.7399	27.1194	9.93606	12.9455	26.2827	13.783	7.21333	12.9607	15.1828	58.5106	30.2128	9.00955	9.17928	15.5594	30.7373	49.3619	40.3225	15.8812	21.7068	18.0411	23.7339
ENSG00000146859.6	TMEM140	133.548	3.86087	6.03344	1.56271	0.0966367	1.66528	3.57878	6.99241	3.8557	3.18455	4.45834	3.57264	6.12088	4.55533	3.48652	3.10047	4.18648	1.69239	2.42565	3.53772	3.92375	12.2572	6.32963	2.66392	2.94509	2.23285	9.91821	11.0322	6.71156	2.42779	10.1996	3.71306	2.77985
ENSG00000182154.7	MRPL41	400.176	12.1916	16.9309	1.38873	0.0827334	9.43388	8.12557	15.116	22.9969	12.36	13.3611	8.15285	12.2306	13.8981	11.9138	15.8984	7.84739	10.2532	10.339	9.44804	21.8094	22.6902	10.783	31.2685	23.655	25.1124	12.0582	10.403	14.2011	20.2707	9.05667	6.1109	11.3823
ENSG00000083454.21	P2RX5	16.9421	0.457681	0.990527	2.16423	0.00920455	0.543213	0.294864	0.181453	0.432906	0.206819	0.498878	0.0580059	1.34648	0.322	0.0978641	0.0192309	0.472716	0.285464	0.186841	0.418483	0.339768	0.763118	0.425568	0.250308	0.143451	1.51274	0.693518	2.03003	2.83144	0.496374	0.629494	1.00394	0.457102
ENSG00000269741.5	AC011473.4	50.0566	2.68146	0.971897	0.362451	0.0368729	3.07955	0.830896	7.90218	1.40756	4.07956	0.937192	7.16686	0.110138	1.6286	1.20208	7.12815	1.59393	0.393767	1.08	0.181422	3.77449	0.551382	0.582611	0.474751	0.207297	0.121445	0.47472	0.0956594	1.37114	1.50633	0.379028	1.08808	0.707729
ENSG00000094841.13	UPRT	109.492	3.47499	4.62827	1.33188	0.0884271	3.3467	2.09922	1.05205	2.51481	4.32519	5.67279	4.38771	3.9188	4.18457	1.74181	3.53684	4.90788	2.15547	3.92587	2.85517	2.4777	4.42677	4.35193	3.57332	2.69501	4.65353	6.38824	6.48002	4.60164	5.59523	6.58747	5.58388	1.45279
ENSG00000128218.7	VPREB3	16.4978	0.460959	0.952573	2.0665	0.0499001	0.287019	0	0.113307	0	0.426183	0.456896	0.265623	1.74505	0.105323	0.224071	0.396282	0.36078	0.178256	0.855591	0	0.875181	0.116483	0.769253	2.14916	0	1.53937	1.8804	1.21252	1.44831	0.340952	0.240217	0.287331	0.224269
ENSG00000169218.13	RSPO1	15.1922	0.378054	0.947802	2.50706	0.0117516	0.170037	0.0399961	0.111876	0.538272	0.336641	0.451127	0.131135	0.482446	0.374374	0.0442485	0.0521705	0.712449	0.140804	0.168958	0.41627	0.46087	0.345038	0.334198	0.551728	0.908042	1.13995	3.39149	1.07749	1.59346	0.471306	0.237184	0.510665	0
ENSG00000137996.12	RTCA	521.808	16.8437	20.9194	1.24198	0.082957	19.6009	17.9403	20.7101	15.0808	20.3161	17.2069	21.2341	13.915	15.1891	16.0672	19.3152	10.29	16.971	12.8458	14.4725	25.3326	26.0869	18.8501	11.9573	19.5273	15.305	27.7476	17.4133	17.8697	19.449	26.0545	10.7345	34.3249
ENSG00000204060.7	FOXO6	41.1149	2.10628	0.947746	0.449962	0.00231722	3.1395	1.23651	0.720572	1.38676	0.289098	2.49883	1.0811	2.61903	1.23242	1.25398	1.37768	4.22163	4.94254	2.33967	1.75491	0.395782	0.237047	0.31309	0.492031	0.58485	2.74108	1.97711	1.31087	0.36842	1.1275	0.488848	0.584726	0.399344
ENSG00000103512.14	NOMO1	250.151	10.3987	7.4593	0.71733	0.0481288	4.87425	6.79418	7.54244	11.4296	16.1728	5.26855	11.6253	11.3418	12.0787	10.0299	23.6096	11.1569	8.96945	6.43531	7.15159	9.49045	8.88948	7.78983	8.33591	8.74543	5.00249	7.38543	4.6712	5.94287	6.21905	10.2238	6.41569	6.55926
ENSG00000254122.2	PCDHGB7	81.4882	2.28644	3.84551	1.68187	0.0571873	1.23396	0.771241	1.79543	4.10917	1.44836	1.9643	2.08818	2.55081	2.43222	0.935811	0.892419	5.40661	1.33566	4.01995	1.81253	8.64803	2.23209	6.27423	7.91979	2.94518	5.24722	3.57247	2.60646	2.46524	2.72226	1.77043	0.635298	1.65289
ENSG00000257446.3	ZNF878	11.7251	0.329002	0.737695	2.24222	0.147669	0.605819	0.1425	0.03986	0.523033	0.149926	0.482191	0	0.368333	0	0.157651	0	0	0.125416	0.300986	0.539314	0.0342087	0.77857	0.541228	1.5877	2.42642	1.08306	0	0.106638	0.509499	0	0.591537	0	0.63116
ENSG00000081237.19	PTPRC	445.126	11.9231	20.6984	1.73598	0.0763586	6.62668	11.6298	12.379	9.21645	11.8813	15.7472	8.88972	38.3042	14.2117	7.57365	5.00971	13.1786	8.33784	3.71451	10.6466	11.0056	37.992	27.1679	4.69028	3.67139	17.0279	30.0189	47.6997	35.9302	13.997	13.5536	13.803	11.2213
ENSG00000134470.20	IL15RA	185.618	5.4393	8.21756	1.51077	0.040109	3.13162	4.72569	8.50176	9.02613	4.88847	5.02346	3.21028	5.24332	9.35238	7.33442	4.10204	5.26873	3.68038	2.22609	4.37477	4.30928	20.7259	6.32718	5.62781	6.00949	11.3049	11.1106	10.2784	7.32811	5.3798	7.70161	6.75235	2.67283
ENSG00000113209.8	PCDHB5	28.5837	1.683	0.472215	0.28058	0.0649755	1.74671	0.0362523	0.0608426	5.32241	0.279703	0.32712	0.570527	0.874574	1.86632	0.0802133	0.449228	6.7805	0.638121	3.752	0.960416	0.487353	0	0.220302	0.461616	0.58789	0.137766	0.560955	0.21703	0.259234	0.549245	0.171986	0.462865	0.722556
ENSG00000172037.13	LAMB2	326.05	9.85572	13.9242	1.4128	0.0406843	8.77321	5.39903	9.10153	10.4147	10.3761	8.13993	10.3496	13.6452	18.165	7.2274	7.91101	14.1374	4.26074	13.1903	5.24458	6.54959	7.35906	11.2919	14.6472	28.2508	24.3816	12.0858	17.9388	13.3288	9.66436	13.5753	10.8763	9.7646
ENSG00000103490.13	PYCARD	358.915	15.5179	9.91902	0.6392	0.0208706	8.22178	22.4632	19.8072	23.0238	18.834	8.977	18.3881	10.7666	7.92931	14.0716	39.3912	10.2022	9.4923	10.7618	8.93789	12.4278	22.8864	8.41871	9.3924	5.54861	7.06665	12.7986	5.00959	11.8536	6.88678	5.91069	7.17548	12.272
ENSG00000170903.10	MSANTD4	139.606	4.45067	5.81892	1.30743	0.0739216	3.77257	2.42013	4.46791	4.94478	4.49836	1.31028	4.09439	5.73423	4.29151	3.7752	4.18276	7.28556	3.62098	5.57181	5.28953	5.55415	5.5953	5.86441	10.3492	4.86656	4.27662	6.48605	7.64269	2.49701	3.05554	6.11388	7.38167	4.66286
ENSG00000112619.7	PRPH2	15.5952	0.413203	0.938238	2.27065	0.00174473	0.117662	0.0830295	0.464498	0.406334	0.378543	0.374605	0.0816682	0.357689	0.496531	0.413357	0.162454	0.517651	0.109613	0.26306	0.471356	0.358777	0.334263	0.346888	0.792938	3.56811	1.10435	0.436821	1.18054	0.593731	0.419316	0.73857	0.471161	0.551629
ENSG00000111537.4	IFNG	13.5856	0.285365	0.931162	3.26305	0.00623972	0.143745	0.20287	0.226986	0.248204	0.142294	0.114411	0	0.349583	0.421982	0	0	0.542058	0.0892741	0.107124	0.191948	0.340907	5.89206	0.770516	0.107635	0.164493	0.192737	0.565045	0.607256	0.414483	0.170756	0.84214	0.287802	0.449274
ENSG00000130653.15	PNPLA7	35.1446	1.01546	1.74713	1.72052	0.0676295	1.00037	0.594456	0.436486	0.7576	0.608059	0.684473	0.349202	1.6219	1.39751	0.602854	1.74466	1.8972	0.534088	0.706274	0.796807	1.48057	0.74787	1.0066	1.95807	1.54643	3.41212	1.41809	1.92769	1.4043	4.83676	0.308458	1.03659	0.329119
ENSG00000016864.18	GLT8D1	150.895	5.0713	5.97116	1.17744	0.0399794	5.22977	4.14765	3.5262	6.39308	5.29151	5.93071	4.13319	6.47187	5.43457	3.90215	4.85636	6.57376	3.50668	4.10437	5.06767	4.12387	5.93532	6.52452	5.30218	5.29614	5.08851	5.57905	8.89599	4.97101	5.93759	6.31371	7.36669	4.99047
ENSG00000133318.13	RTN3	496.272	19.3995	16.0061	0.825074	0.0798257	25.6033	21.1601	27.6135	13.1531	11.7598	18.5981	10.4066	22.4401	16.1504	18.5957	24.4987	22.6839	19.7121	21.7388	15.379	15.5156	12.9179	20.9021	17.2022	10.7579	12.2403	18.378	17.2714	12.1155	18.6005	15.8372	16.5225	18.5177
ENSG00000133111.3	RFXAP	124.636	4.06967	5.10701	1.25489	0.043189	4.25177	2.5181	3.05722	3.47411	2.66811	4.83446	1.68635	6.92421	2.98109	3.79347	4.89194	4.29462	5.89418	4.01731	4.25815	5.5305	5.76203	4.84302	5.05976	3.90975	7.2279	5.80319	6.89602	2.73656	5.0507	3.55846	4.56041	4.15277
ENSG00000117616.17	RSRP1	766.5	24.3682	31.0597	1.2746	0.033438	15.7481	20.4279	21.4341	25.2594	28.2871	22.2629	19.2059	42.961	23.0397	18.0999	24.7866	17.0782	26.9443	21.5161	36.9725	24.9773	29.1571	26.4415	34.6245	30.8892	50.753	37.448	48.021	28.6032	26.6854	20.9332	25.4252	18.518
ENSG00000164463.12	CREBRF	136.018	4.41287	5.58651	1.26596	0.0397805	3.62003	4.11726	3.4242	4.93927	4.41963	3.94343	3.38301	7.73352	3.75072	3.43565	3.74368	3.08709	5.62503	4.2953	5.17517	7.47906	4.8453	6.6736	4.06064	3.28155	6.41467	6.11359	9.55059	4.83023	4.16535	3.65945	5.96887	4.28171
ENSG00000104691.14	UBXN8	57.4883	1.75635	2.61101	1.48662	0.0409603	2.5035	1.80502	0.77346	1.45659	0.996678	2.77234	2.54352	1.15812	2.81591	2.20937	1.47779	0.684102	1.52102	0.892293	1.23546	1.67794	1.85533	2.91728	2.40436	5.29375	2.11622	2.87622	2.41411	2.04008	5.36599	1.09318	1.52552	1.06313
ENSG00000117016.9	RIMS3	36.528	1.72177	1.03857	0.6032	0.0761045	3.67829	0.819668	3.22897	2.27727	3.04228	1.02083	1.85881	0.89749	2.12232	1.47357	1.81536	0.730036	0.541049	0.432821	0.387769	0.51652	1.09995	0.389145	1.70329	0.166153	0.908516	0.549608	0.86896	0.99433	0.948633	2.18735	0.847894	1.02107
ENSG00000118308.15	LRMP	64.5466	1.76541	3.1435	1.7806	0.0353694	1.61573	0.897171	0.930625	1.18913	1.42899	2.61419	1.02954	4.57357	1.20523	2.1919	0.536369	1.26518	1.39827	0.532964	3.57232	2.12683	2.6229	3.18035	1.15034	0.636522	3.94216	8.75754	5.79066	4.56342	1.98227	1.83997	1.37884	1.59363
ENSG00000103522.15	IL21R	67.7473	1.82272	3.32357	1.82341	0.0163393	0.86468	1.58192	1.37805	2.70959	1.79116	1.68233	0.592756	6.62015	1.50422	1.50009	0.397949	2.09327	0.974585	0.525061	1.62504	1.43222	5.93964	2.36897	1.0791	1.46591	4.1652	3.4549	8.76012	5.40208	1.74997	2.89473	1.66712	1.52644
ENSG00000198298.12	ZNF485	86.8808	2.72828	3.7505	1.37467	0.0357319	2.84864	1.34011	2.68164	2.081	2.63912	0.988321	2.80527	2.75335	3.77922	2.22389	2.05057	1.19357	4.89924	2.06848	5.07185	3.83574	2.93468	2.46662	5.4693	4.51358	2.54635	3.82826	2.69997	1.89552	3.21038	2.26187	5.63034	6.16388
ENSG00000153898.12	MCOLN2	55.9372	1.56609	2.71123	1.73121	0.186216	1.52599	1.8306	2.2691	2.23968	0.755292	1.49799	0.753189	3.92763	1.36258	1.509	0.32774	1.21483	1.07409	0.379075	1.32451	0.982312	4.54156	4.00807	0.647497	0.174625	5.11521	3.51022	6.12426	2.56674	1.02721	1.78802	2.54607	0.914146
ENSG00000075089.9	ACTR6	147.279	6.19475	4.39675	0.709755	0.026092	4.3162	5.11948	3.49846	3.9246	4.36354	6.28606	5.29051	5.77885	6.18373	10.0729	14.2431	4.61737	6.30229	4.31161	7.1125	6.44049	3.76424	5.68557	2.75057	3.5205	1.6623	5.85604	5.18891	2.8797	4.79997	2.65165	5.24022	5.41762
ENSG00000125630.15	POLR1B	219.647	6.99273	9.04276	1.29317	0.0663584	8.16071	5.71963	4.04067	6.01855	3.46409	7.44215	5.77306	7.09767	8.87212	5.50708	9.96872	7.8586	6.88941	7.38047	9.19804	6.79498	5.55729	13.8201	12.8841	6.48955	5.60086	8.92889	7.0119	5.80299	6.50658	11.8772	11.2989	13.6826
ENSG00000179918.18	SEPHS2	496.134	19.9065	15.4105	0.77414	0.0370762	15.3051	11.575	14.6038	16.2948	16.4754	15.2955	14.9898	24.7447	18.8131	21.9144	28.2068	24.4145	31.1587	14.1167	29.1897	16.6955	18.0492	13.1705	10.4838	12.0165	8.65029	15.9474	19.8609	11.0823	13.0447	14.188	27.3454	18.5015
ENSG00000167850.3	CD300C	15.2665	0.423575	0.900988	2.1271	0.0197182	0.115413	0	0.77455	0.398567	0.57124	0.183722	0.0534047	0.421021	0.508214	0	0.42493	1.01551	0.215035	0.172021	0	0.547429	1.82672	0.371189	1.12346	0	1.08324	0.856942	1.09702	1.83034	0.6855	0.579561	0.231077	0.180361
ENSG00000150540.13	HNMT	57.0895	1.68076	2.66754	1.5871	0.0206516	1.10438	1.24691	0.813828	0.730992	1.25722	1.46503	1.15833	2.5963	2.35049	1.14957	0.931823	4.81242	0.960241	1.53632	1.59762	1.4343	3.07765	3.17697	1.07503	1.4323	1.28335	4.03571	6.33731	2.73331	1.13698	2.83452	2.17431	2.64633
ENSG00000140694.16	PARN	581.588	22.364	19.1484	0.856215	0.0467093	21.2559	20.3	14.8897	23.4565	20.3888	19.7804	20.7067	33.0616	22.6374	21.0546	19.3628	25.5633	29.9756	18.8779	22.6483	20.8871	20.7716	19.7464	20.5833	16.8714	12.9109	23.9251	22.6179	12.2408	17.6561	16.9204	20.519	21.9785
ENSG00000135069.13	PSAT1	344.921	15.1223	9.29896	0.614916	0.0238921	26.0062	23.377	18.9851	9.11913	6.09927	32.036	14.1443	4.32993	6.871	21.552	12.8158	12.6735	11.1817	14.5505	11.5935	29.3065	3.31242	9.69371	10.4256	7.41709	2.03854	7.89858	6.08478	4.44158	10.5511	6.02738	11.1347	11.2544
ENSG00000184922.13	FMNL1	150.164	4.27328	6.83575	1.59965	0.0270865	3.46651	1.94063	3.91385	7.10292	4.86131	4.58011	2.72687	9.77929	4.74049	2.36346	2.06336	7.5237	2.22467	1.67058	3.64144	3.48422	8.91936	5.12849	3.37438	4.20487	16.7017	6.9848	10.8368	10.9618	3.32176	5.58973	4.21059	3.84626
ENSG00000214013.9	GANC	178.255	5.63939	7.42033	1.3158	0.0653854	2.50939	5.53789	6.99754	8.72109	5.86205	4.41442	4.58547	8.5419	6.53963	4.5295	4.6784	5.76608	5.79713	4.08561	4.52474	4.64081	9.60673	5.80879	4.50002	11.1023	7.67226	9.87108	8.37275	6.85549	12.5502	5.29731	3.61616	5.27034
ENSG00000283227.1	SPRR5	49.2761	2.49884	1.12258	0.449241	0.166381	4.28597	0.302443	3.38395	1.85014	2.54562	4.94644	7.04046	0	2.83095	1.84029	5.02992	0.26937	0	0.798516	0.85848	0.871254	0.347881	0.918961	0.802319	0.49046	2.01136	0.0935978	0	1.08136	3.56393	0.538062	2.57437	0
ENSG00000172889.15	EGFL7	222.549	6.26899	10.1011	1.61129	0.107056	6.7893	1.54858	7.39091	13.7361	8.92708	6.33176	3.90319	7.54685	5.76283	6.6923	5.27082	5.60318	3.66286	5.11075	4.25827	5.1116	7.12496	5.9184	13.7621	18.4422	21.7007	8.0573	17.4552	15.9184	5.53963	5.10825	3.0894	2.78645
ENSG00000172273.12	HINFP	73.0297	2.38459	3.0816	1.2923	0.0229018	1.69101	2.51216	1.37026	2.62787	1.60346	2.02598	1.59789	5.01073	1.95954	1.4869	1.68757	3.40092	2.32153	2.33469	2.63837	1.61019	3.14242	2.87195	4.8649	3.56464	3.24589	3.04758	3.70346	2.61762	2.30479	2.33891	3.27877	2.16973
ENSG00000187118.13	CMC1	41.6119	1.40766	1.79207	1.27309	0.0569125	0.897599	1.52485	0.761189	1.26287	1.93339	1.74638	1.2691	1.77868	1.05523	1.21981	1.0404	1.27453	1.29042	0.929063	1.63142	1.4079	1.47736	2.24532	1.29444	0.855966	1.11437	1.61172	2.68595	1.48581	2.13253	1.58594	2.87876	1.22088
ENSG00000144791.9	LIMD1	151.594	5.0208	6.08322	1.2116	0.0608208	5.80244	3.83132	3.10872	4.90218	5.60027	5.76194	3.74613	5.89652	4.49165	4.9505	3.86578	5.366	4.80487	4.93165	6.752	3.74452	4.2948	4.76168	5.5241	5.47007	8.57659	6.67365	8.49186	6.2642	8.63236	5.44596	5.67043	4.23161
ENSG00000165457.13	FOLR2	41.9226	1.16677	2.09393	1.79464	0.207947	0.494581	0.436257	0.976232	0.853991	1.34637	0.787306	1.20149	2.63113	1.72414	0.193056	0.455239	2.64215	1.07507	0.276436	0.908093	1.63375	1.7563	1.25927	1.7591	2.12238	0.828934	4.05029	4.96226	4.27831	0.293758	1.8627	1.11402	0
ENSG00000168026.18	TTC21A	30.3282	0.987754	1.40861	1.42607	0.0138393	0.34209	0.305772	0.756265	1.26013	1.70447	0.744234	0.675388	2.16307	0.878717	0.534128	0.776699	0.45867	0.623209	0.509877	1.58359	0.904023	1.09215	1.0391	0.87092	0.939522	2.72152	1.15546	1.80646	1.70976	1.40875	1.41245	0.936061	1.01574
ENSG00000205937.11	RNPS1	661.242	25.1062	22.1115	0.88072	0.0403128	24.8485	24.6462	21.6646	24.6409	22.1237	25.2823	21.9954	34.7302	28.4926	24.9891	20.3744	25.5156	29.6483	20.6009	25.5396	22.4083	27.2479	23.6864	20.8212	25.8437	15.7834	25.7779	19.2623	16.78	23.6771	20.66	26.5706	17.6305
ENSG00000114315.3	HES1	1257.46	50.8157	38.3093	0.753886	0.0401391	64.7004	49.7307	37.6089	28.0028	43.4126	32.7095	49.0726	33.2457	95.0304	47.2625	59.2802	43.4388	51.1512	40.9403	85.1495	47.7535	32.2193	47.6982	46.4124	29.6351	36.2036	61.042	20.9839	41.4988	45.3886	30.8414	19.8902	37.1534
ENSG00000188171.15	ZNF626	30.2709	0.886925	1.52054	1.71439	0.0275664	0.469458	0.846596	0.473617	0.427822	1.83306	0.311381	0.193094	1.95041	0.564659	0.223971	0.732193	1.80309	0.469736	0.738589	0.766191	0.627375	0.804433	1.2722	0.644461	3.61131	1.18898	1.15052	2.42396	1.56047	3.03621	0.436563	1.20103	0.509474
ENSG00000144228.8	SPOPL	201.522	8.07915	6.39501	0.791545	0.0416124	8.49964	10.2001	10.4937	4.69735	5.93524	6.44196	12.7259	7.57052	5.90021	8.15705	6.10434	6.94116	8.45611	11.2564	6.30749	5.12657	8.25017	6.05055	4.92533	3.7481	3.30282	5.89954	8.89098	6.22465	8.19961	4.62161	7.47913	9.11603
ENSG00000099942.12	CRKL	729.442	28.6812	23.2326	0.81003	0.119355	35.937	33.2709	33.5657	22.9644	28.8857	31.7699	31.0215	19.0707	27.424	34.4211	9.59362	21.119	24.7285	43.027	31.9187	37.6515	20.4157	25.0792	22.7484	17.759	17.5019	22.2013	20.7307	22.7771	24.0594	20.3907	21.3288	28.0801
ENSG00000147408.14	CSGALNACT1	113.838	3.48384	4.95236	1.42153	0.0524159	3.93801	1.52088	4.23317	2.98637	4.72795	3.96034	2.56096	4.20616	3.86652	5.81632	2.04505	3.41151	1.58642	2.55799	3.33989	2.79461	3.8443	5.10606	2.90888	3.62341	2.60441	4.52076	9.77941	6.17624	2.52864	3.78579	9.48279	5.9254
ENSG00000143452.15	HORMAD1	282.78	6.59976	14.3525	2.17471	0.122658	0.145598	0.154114	15.634	7.60496	14.0525	0.463545	0.370546	5.62117	0.400707	22.9037	7.80645	0.36603	0.678186	0.0542526	21.2406	0.172651	24.4038	7.41426	30.4717	19.6604	0.585665	21.1126	8.30363	0.629739	26.5489	0.182785	21.2804	24.5166
ENSG00000168237.17	GLYCTK	56.5873	1.68608	2.62278	1.55554	0.0360333	1.51083	0.533064	1.16992	3.21076	1.84071	1.89628	0.564657	2.40241	1.4713	1.45167	1.28367	0.803462	2.05707	0.996012	2.59942	1.49624	1.69796	1.80658	1.65342	2.99233	6.62267	2.3857	2.63894	4.35641	3.31333	1.6049	1.04709	1.18052
ENSG00000131828.13	PDHA1	494.436	15.5597	20.2955	1.30437	0.0354103	14.2622	10.3392	8.53774	13.8271	10.2608	22.8895	23.2064	9.85587	20.5624	16.8231	13.7553	14.3027	17.7879	15.2171	20.2676	23.4869	16.0201	14.7677	15.5521	17.391	18.1826	18.4834	14.2808	15.5902	14.8591	30.0044	38.3468	25.5765
ENSG00000132185.16	FCRLA	13.0349	0.404331	0.751535	1.85871	0.0999646	0.534601	0.0377245	0.253254	0.184619	0.370443	0.340405	0.197899	1.20262	0.156939	0.125206	0.270641	0.0671986	0.498027	0.0398405	0.285548	0.615819	0.433922	1.00296	0	0.0611765	0.788487	1.58776	1.0163	1.81126	0.381033	0.134228	0.428145	0.208861
ENSG00000132640.14	BTBD3	238.133	10.7	6.18708	0.57823	0.0223733	5.87541	9.52199	3.30715	7.83936	9.82337	4.38555	9.66507	9.74237	7.74716	8.22998	6.80534	32.5096	9.27083	10.1399	24.1376	4.06691	4.7347	6.16316	8.88307	4.95414	3.9578	6.20056	8.55073	3.5261	7.01284	4.94088	8.18948	7.95168
ENSG00000065413.19	ANKRD44	116.572	3.334	5.33555	1.60034	0.0489266	3.48442	1.90919	2.37349	2.27684	3.04345	4.43738	1.75143	9.91954	3.52999	2.04817	3.00601	2.59357	2.79202	2.08756	3.257	3.67583	7.17036	6.05736	2.3226	1.26657	7.95155	7.6929	12.0214	7.50582	3.36002	3.14496	3.25565	2.63721
ENSG00000270170.1	NCBP2-AS2	375.339	11.4946	15.8247	1.37671	0.0749307	17.737	9.28628	11.4442	9.05621	7.83501	13.9657	8.82515	10.784	12.3874	5.50903	13.254	19.1787	11.2526	6.39596	14.0072	23.3265	6.50174	17.2772	29.4187	24.8804	8.18315	13.6612	10.0713	9.3489	18.5778	14.3659	11.0738	17.7338
ENSG00000170456.15	DENND5B	71.3528	2.02238	3.37054	1.66662	0.0579537	2.32204	0.513417	0.623338	2.25866	2.89623	3.15424	0.80227	3.70827	1.44285	1.05141	0.819309	4.45599	0.67299	1.00367	3.11103	2.486	6.40812	3.31085	0.660711	1.02745	2.38698	5.22643	5.44429	1.99749	1.32401	1.9434	3.1769	7.12445
ENSG00000095370.19	SH2D3C	75.3925	2.15972	3.52282	1.63115	0.046562	1.76622	1.48501	1.78023	2.53063	2.32499	2.5424	1.7215	4.50103	2.165	1.93628	1.26253	1.84223	1.54037	1.5403	1.95705	1.93525	2.8672	2.3568	1.63205	2.83823	7.75963	3.20059	8.09649	6.77238	2.00883	1.47822	1.73052	1.82053
ENSG00000113369.8	ARRDC3	611.877	25.0232	18.4099	0.735714	0.0281985	12.5261	24.1637	17.5665	23.712	31.8598	23.9222	45.7453	21.0566	32.7354	20.1396	25.3294	41.1248	17.7186	19.569	16.6792	16.9634	14.4875	26.8194	13.4181	11.8165	11.9423	23.5887	27.0956	34.5326	15.2592	12.9485	17.7616	11.3957
ENSG00000100813.14	ACIN1	1654.59	52.6678	66.7208	1.26682	0.0719321	57.2139	28.1543	39.1791	58.1396	40.5985	61.4011	50.7788	63.0159	48.5483	59.9097	41.6331	49.8612	64.6209	48.1521	77.3107	51.6345	37.5865	87.4206	97.5831	98.9669	98.4369	48.4167	80.4387	54.8896	42.6235	63.5349	46.9636	57.5748
ENSG00000166501.13	PRKCB	72.4373	1.92826	3.56257	1.84756	0.0549551	1.34241	2.10631	1.82675	1.34985	1.58681	2.30035	1.10349	6.51018	1.30394	1.09731	0.67596	2.79908	1.19662	0.506092	1.71875	2.02791	3.58927	3.80102	0.733189	0.921703	6.28919	4.84228	8.47321	7.87817	1.74474	1.67866	1.96046	1.0736
ENSG00000163312.10	HELQ	138.768	4.55479	5.63428	1.237	0.0628075	5.0926	4.09275	4.20697	4.11172	4.99451	5.59214	3.79655	5.36111	3.39143	3.60759	3.66754	3.43775	6.41346	4.42773	4.628	4.39332	4.55455	5.13098	4.55475	2.96779	7.01796	8.87647	8.6155	5.23468	5.32135	3.82807	6.84471	4.60557
ENSG00000144848.10	ATG3	450.919	17.9207	14.2238	0.793707	0.0396907	16.8464	19.3682	17.9381	11.304	22.547	14.5715	18.9313	17.0533	25.4947	13.7332	29.483	13.6489	14.9287	17.0383	14.4231	18.0157	20.3362	13.5298	10.6836	5.27849	9.83424	15.0787	11.6495	10.8841	13.6135	14.9146	20.8513	18.939
ENSG00000114316.12	USP4	362.383	11.3306	15.0173	1.32538	0.0330162	9.43901	10.0189	9.06132	15.2768	12.532	10.9658	10.2318	14.8666	9.84107	10.7967	13.5768	10.08	9.84648	7.58294	14.3421	11.3932	10.7132	11.9654	15.9666	19.8578	33.8435	13.5392	15.6058	15.7881	15.2729	8.78005	10.8443	10.3543
ENSG00000182923.17	CEP63	230.587	9.17509	7.36624	0.802852	0.0599355	7.73833	13.2173	4.73205	7.37952	7.20961	6.03842	8.62027	10.5064	12.3606	5.88325	10.2419	8.70978	11.0673	10.2648	12.1568	8.07659	6.19206	11.7481	6.13521	4.3987	6.69111	7.99671	7.78098	4.56957	7.61027	6.71636	9.60324	6.94229
ENSG00000159640.15	ACE	31.3355	1.03149	1.43563	1.39181	0.0818402	0.565117	0.354471	1.24766	1.08421	1.16026	1.21611	0.445509	1.3998	1.22119	1.27451	1.14629	1.21022	0.376968	0.655117	0.614876	0.865126	2.66721	1.03217	0.924667	0.910151	1.09449	1.40781	1.85683	1.79546	0.770759	1.54152	2.1372	0.359795
ENSG00000168439.16	STIP1	941.099	37.234	29.6453	0.796188	0.0354339	34.3246	28.1743	60.0936	39.6311	34.4433	30.9707	30.3045	28.0692	39.3868	37.7736	44.2249	44.9413	53.4924	21.2093	29.9708	43.1159	38.0678	25.6941	26.4337	25.555	20.1131	26.3218	19.4955	25.2583	25.3668	45.8444	22.6946	40.1276
ENSG00000071246.10	VASH1	169.233	4.93484	7.5393	1.52777	0.0345712	3.1505	3.13525	4.14576	5.67243	4.61141	3.7721	3.88752	11.2309	7.73688	4.0572	3.69302	4.87402	4.93342	3.79272	3.82942	3.22955	9.4747	7.83758	5.02056	4.43722	12.2757	6.16272	19.1394	7.12383	2.78289	6.08485	7.44002	5.70192
ENSG00000152518.7	ZFP36L2	1031.14	31.288	43.4321	1.38814	0.0580088	23.0695	75.3121	30.3697	21.3075	43.9851	35.6301	21.6127	38.9676	20.5986	23.3723	25.8562	38.1083	21.0646	17.7924	30.7738	25.2454	54.3484	42.6586	19.0477	15.7203	61.4197	52.5107	53.7819	61.6367	40.572	27.7127	46.3313	62.3317
ENSG00000170855.3	TRIAP1	259.253	10.2909	8.28384	0.804968	0.0426815	6.55646	11.3095	7.9087	7.44251	8.17293	9.37397	9.66336	7.0867	11.0494	12.3224	12.4051	14.6514	11.4618	8.86741	14.5918	9.54351	8.47532	8.85121	8.00049	7.64176	4.06994	8.53785	4.87279	5.77661	10.2404	6.4019	10.6962	13.2819
ENSG00000184384.13	MAML2	329.844	9.76523	14.3205	1.46647	0.052511	3.94051	15.5369	10.0433	9.39811	7.16759	13.0356	8.1824	20.2594	7.48295	8.13295	3.55905	16.686	4.64984	8.84656	8.05728	4.48075	15.7922	13.8879	11.9868	30.4095	14.5297	15.9414	22.9674	15.5699	14.3354	8.86325	10.0592	6.04254
ENSG00000248099.3	INSL3	9.24976	0.269837	0.615554	2.28121	0.0515714	0	0.133855	0.149766	0	0.281659	0	0	0.922628	0.0696065	0.148086	0	0.715305	0	0	0.126648	0.0642664	0.384912	0	0	0.651202	1.52603	1.32558	0.601006	1.50413	0	0.158757	0.189894	0.296433
ENSG00000138814.16	PPP3CA	433.823	14.1013	17.3156	1.22794	0.0478259	10.1764	9.40888	19.6625	11.3085	23.8212	15.7183	13.4274	12.9053	14.21	11.8513	13.5094	13.4671	12.3066	15.4431	12.8041	15.7255	16.3564	13.3941	9.22949	12.2218	18.6434	19.4071	15.8909	15.2769	21.0255	26.8722	17.5843	22.1752
ENSG00000185040.13	SPDYE16	8.00281	0.465279	0.294125	0.632149	0.0340532	0.145457	0.923786	0.114844	0.12558	0.263979	0.347322	0.246791	0.294789	0.444799	0.151408	0.267773	0.792296	0.572136	0.1084	0.679818	0.032854	0.0393546	0.337866	0.0726109	0.166452	0.325054	0.381182	0.0512073	0.209709	0.518368	0.0811588	0.194153	0.113656
ENSG00000140995.16	DEF8	186.294	5.62972	8.04986	1.42989	0.0259569	5.78716	3.97085	5.04298	10.2459	4.76515	4.66987	3.80085	7.00466	5.47052	4.97599	7.99022	2.44715	3.16353	4.17369	9.43717	10.0836	5.11941	5.07484	6.8495	17.1818	14.947	6.91894	6.788	7.42073	6.241	5.60238	5.28618	5.83475
ENSG00000100968.13	NFATC4	100.763	2.90585	4.61345	1.58764	0.0519888	2.88448	0.717535	2.49861	2.56197	3.11214	2.95653	1.31552	4.75654	2.93173	2.62448	1.16516	6.10379	2.80958	3.03113	2.61863	1.97562	1.62541	3.07008	3.48064	6.93411	7.06739	4.16925	12.0322	5.07114	2.81022	5.38402	3.15767	1.89713
ENSG00000186352.8	ANKRD37	108.325	4.69144	3.13488	0.668213	0.0601579	6.03964	3.11264	4.01844	5.85878	9.60618	2.48459	9.26333	2.47554	2.29097	2.70188	5.37182	1.62071	2.9502	5.86643	5.2105	2.32213	1.81768	4.43781	4.67485	2.64031	4.00356	1.18557	1.86343	4.64727	4.35308	2.66939	2.71739	2.12099
ENSG00000196793.13	ZNF239	47.5954	1.41659	2.24204	1.58269	0.0817843	1.67476	0.0492419	0.853979	0.42172	1.03616	0.722037	1.77593	2.63044	1.71564	0.217909	1.09192	2.456	1.77687	0.624046	2.70227	0.661977	0.311519	2.95499	1.88105	3.43371	1.40347	1.09721	2.94794	1.55939	1.24341	2.62812	3.14357	4.58013
ENSG00000196209.12	SIRPB2	20.6973	0.601316	1.11366	1.85203	0.043346	0.208679	0.319055	0.508013	0.360325	0.55086	0.387554	0.643742	1.2899	0.727466	0.271521	0.304126	0.743203	0.259204	0.388789	0.557313	0.353503	0.889243	0.466075	1.04171	0.4776	0.326436	0.683577	2.90184	2.9083	0.702358	1.65919	0.278541	0.489168
ENSG00000128228.4	SDF2L1	192.565	6.08641	8.00531	1.31528	0.131521	6.53171	1.68628	6.66645	5.08898	7.56969	7.8616	7.29798	7.16757	4.96904	5.84543	4.03253	4.60577	7.5195	7.9545	4.99921	10.471	6.65936	9.30803	11.8096	12.9436	8.11707	8.07139	5.38408	9.07243	5.10963	9.4666	2.87069	3.48545
ENSG00000176595.3	KBTBD11	14.1013	0.373375	0.869285	2.32818	0.00804018	0.521853	0.0552375	0.236915	0.360433	0.309951	0.145376	0.338065	0.713885	0.105323	0.101851	0.0480342	0.426376	0.178256	0.350014	0.209055	0.0972424	0.825972	0.881144	2.50085	0.26873	0.384843	0.706573	0.744047	0.695943	0.185974	0.764326	1.80235	0.142717
ENSG00000159459.11	UBR1	262.5	8.80368	10.2496	1.16424	0.0536249	9.27609	6.22219	7.89474	8.70885	7.21852	8.56219	8.98443	13.3275	7.83024	8.61844	9.1875	9.02203	10.2953	6.84718	8.55999	10.0138	13.2977	10.6062	10.6828	7.99152	8.1814	10.56	13.5777	10.1827	6.51511	11.0549	7.92677	11.3544
ENSG00000173928.2	SWSAP1	34.9794	1.18067	1.54379	1.30755	0.074579	0.623807	1.39395	0.738783	0.628322	0.977723	0.910264	0.817846	1.58029	1.10639	1.21749	1.53116	1.04549	0.90398	0.929769	1.80481	1.02151	0.843881	0.613027	2.10194	1.90359	2.36985	1.36228	1.75686	1.19915	1.85256	1.91432	0.936725	0.893613
ENSG00000089505.17	CMTM1	66.9735	2.16292	2.87152	1.32761	0.0528194	0.717058	1.85533	1.1323	2.78582	2.01116	1.80731	1.71431	4.14167	2.71898	1.11959	1.87005	3.15467	1.26178	1.78126	2.87254	1.66009	2.57058	2.88273	0.984361	2.73519	3.36508	2.92306	4.54385	2.75681	2.98129	1.90042	2.99098	3.73526
ENSG00000111540.15	RAB5B	460.937	18.3127	14.5421	0.7941	0.0315544	13.6866	28.224	16.8177	11.1509	18.8099	15.5895	15.0642	17.2081	17.9829	16.6809	23.5078	25.8225	17.8421	13.3686	21.4345	14.1182	10.559	13.6044	8.35786	9.09313	12.258	18.6182	15.2688	20.7477	22.888	9.16383	21.1507	11.9195
ENSG00000166908.17	PIP4K2C	436.846	17.2773	13.8836	0.803575	0.0667346	14.17	21.4589	16.0694	18.1901	22.1962	14.3197	14.0223	10.3254	17.235	23.6161	23.9118	25.1496	9.75624	10.7973	16.4413	19.383	14.0645	11.4644	19.5913	12.6321	9.46417	14.974	15.2457	9.67904	10.7804	12.0815	15.3542	14.4724
ENSG00000122140.10	MRPS2	212.237	6.74845	8.75465	1.29728	0.0400072	5.11602	9.57697	5.58211	7.97497	4.71268	8.76613	3.81401	5.31377	6.85751	7.15591	5.2977	9.02095	9.44378	5.40126	5.693	7.58325	9.45859	7.92231	12.1841	17.0755	7.24079	6.61039	4.80285	6.96614	10.8042	6.83897	6.4731	8.55025
ENSG00000180383.3	DEFB124	13.4614	0.340567	0.857916	2.51908	0.017245	0	0	0	0.414695	0.356614	0.57347	0.222263	0.146019	0.35252	0.562483	0.331594	0	0.149158	0.178982	0.320703	0.65095	0	0	0.89917	0.274833	1.93213	0.734274	1.26824	1.55815	0.285296	1.20603	0.480855	0.562979
ENSG00000186951.16	PPARA	146.667	5.92471	4.66123	0.786744	0.0428587	5.65549	7.85084	4.00513	2.84726	6.03761	5.27094	4.80488	6.15224	6.42516	5.4388	4.24251	5.12772	7.91315	10.1073	5.49154	7.89319	3.76264	4.49401	3.25293	2.48566	4.67057	6.60626	4.95181	4.21051	4.89311	3.22573	4.29594	4.55358
ENSG00000185278.15	ZBTB37	126.94	4.07628	5.27662	1.29447	0.086618	4.79442	2.01216	2.26556	3.77425	3.74873	5.93526	5.57747	5.37054	3.23808	3.24434	3.44018	4.28528	3.99994	3.29143	4.66648	4.84563	3.13584	5.52563	4.77544	2.12046	3.90774	5.94422	6.84956	3.47558	6.8814	3.77924	8.52766	7.52759
ENSG00000135744.7	AGT	13.5904	0.37171	0.831904	2.23804	0.0208443	0.229265	1.02462	0.060338	0	0.189125	0.243305	0.0707245	0.836345	0.196302	0.298305	0.0351712	0.288183	0.189849	0.0569522	0.357169	0.46605	0.0930442	0.286749	0.228894	1.31178	0	0.867833	2.09849	0.936522	0.817035	0.38376	1.60659	0.417996
ENSG00000165525.17	NEMF	629.616	20.1038	25.4506	1.26596	0.0247638	18.983	14.2868	14.7386	17.0464	14.9669	20.5644	22.4755	23.5799	20.2637	26.2462	14.1904	22.3438	20.3144	13.6347	36.4231	47.2479	17.6092	24.3633	22.4062	24.3799	26.0257	22.5855	34.8397	20.6869	18.9093	23.4582	23.4477	23.5989
ENSG00000179776.18	CDH5	108.929	3.36558	4.71119	1.39982	0.0350184	1.61206	1.15788	4.73888	2.78354	5.58527	3.23065	3.27683	4.62057	5.01763	2.74176	3.33862	2.27964	2.59236	3.43249	2.57549	3.96948	4.83668	3.85765	2.78063	3.85421	3.43524	5.46929	10.5194	7.15924	4.30871	2.38519	4.06335	3.30651
ENSG00000183283.15	DAZAP2	532.367	21.9525	15.8368	0.721413	0.0339331	17.9328	46.0906	14.7738	13.4514	14.3647	20.7656	21.8405	17.7754	18.2841	34.463	26.531	29.6455	14.2869	13.8196	23.7627	20.8663	17.556	21.2392	6.90838	8.8098	7.86473	20.3349	15.8743	15.7019	24.2783	10.0484	22.3257	12.7709
ENSG00000183542.5	KLRC4	17.2363	0.455619	1.01554	2.22892	0.271249	0.18826	0.398541	0	0.162534	0.372719	0.449526	0.0871128	1.1446	0.414495	0.293943	0.0866423	0.709921	0.11692	0.280597	0.628475	0.318913	2.13928	2.11917	0	0	1.00969	1.23338	3.18124	0.542839	0.223635	0.94537	0.188464	0
ENSG00000154330.12	PGM5	12.9856	0.34274	0.818811	2.38902	0.0014651	0.212192	0.0998232	0.260609	0.28497	0.373422	0.150125	0.152735	0.716726	0.190335	0.0736243	0.0976563	0.266722	0.0439278	0.245985	0.472245	0.479272	0.421009	0.518153	0.688508	0.485639	0.663862	1.90504	2.04182	0.849786	0.644163	0.0986616	0.401241	0.147378
ENSG00000115525.17	ST3GAL5	49.3009	1.47725	2.30324	1.55914	0.028563	0.708138	0.461847	1.69849	1.06526	1.94365	2.86939	0.695066	3.78355	0.956733	1.18105	0.681436	1.30821	1.40601	1.04747	0.852473	0.75974	3.16128	2.7491	1.88799	1.05591	1.46739	2.3759	4.48733	2.16564	1.09611	4.47194	1.47152	1.49229
ENSG00000198841.3	KTI12	37.2681	1.27452	1.61156	1.26444	0.113883	1.53222	1.51371	1.49203	0.970082	1.56731	1.54476	1.03986	0.621051	1.27444	1.03669	0.893214	1.28399	1.2688	0.761246	0.818411	1.765	1.78259	1.47837	1.37677	1.4027	0.684814	1.73997	1.40246	0.883618	2.06282	2.22278	0.613553	2.23484
ENSG00000163297.16	ANTXR2	154.287	4.16939	7.27281	1.74433	0.0587966	1.82821	1.34019	7.23124	3.55518	8.75005	2.75485	2.4886	5.96774	4.74816	3.17321	3.32471	4.37295	3.69288	3.90216	3.91077	3.96896	20.4578	6.62194	2.37903	3.83888	2.71309	6.88411	9.24173	14.2025	2.74103	12.1367	3.67815	4.38261
ENSG00000205784.2	ARRDC5	38.2078	1.0281	1.96818	1.91439	0.024294	0.8551	0.226278	0.717334	1.56878	0.529042	1.3612	0.148379	2.85941	0.706008	0.584117	0.39354	1.61228	0.59745	0.47794	1.28457	0.977767	2.12557	1.71884	0.560252	1.10084	2.86635	1.96075	6.32169	3.39026	1.14275	0.89458	0.642021	0.584632
ENSG00000114354.13	TFG	780.142	31.1305	24.3065	0.780796	0.0540594	32.1486	28.6233	17.8537	24.1838	38.0361	16.603	43.0057	27.8163	36.9477	23.0178	51.3087	37.3256	37.4936	24.6899	26.4035	30.7873	28.1288	17.552	38.0381	10.8722	14.6192	23.7493	18.6613	20.8244	22.2807	31.7183	29.6214	27.832
ENSG00000132746.14	ALDH3B2	492.358	22.136	12.5475	0.566836	0.0156457	30.5243	11.2663	45.4657	13.4102	18.9387	12.4492	8.71505	5.92293	28.4195	51.2088	24.3849	13.878	22.9236	30.1692	12.864	16.0992	3.09698	4.67069	6.92981	1.11479	41.1455	8.81703	5.65875	26.9977	17.7443	5.66199	12.0821	11.7986
ENSG00000089820.15	ARHGAP4	155.915	3.98298	7.61313	1.91142	0.0402562	2.57289	1.26205	2.79937	5.52615	3.09046	3.44637	1.65514	10.6067	3.22385	2.10659	9.61729	4.18065	2.86455	1.9408	3.35187	3.06157	5.55195	4.35607	4.60491	11.2743	23.854	9.71628	12.0622	12.0329	4.32361	2.70481	2.38721	1.7407
ENSG00000105492.15	SIGLEC6	19.7231	0.581203	1.06192	1.82711	0.109181	0.204137	0.384136	0.8596	0.176241	0.370474	0.541598	0.251892	2.06856	0.324605	0.531222	0.156582	0.342131	0.253562	0.253551	0.499751	0.322755	0.690388	1.49545	0.0509518	0.233602	2.1897	1.66432	1.94036	1.66776	1.13165	0.39865	0.613076	0.106338
ENSG00000159618.15	ADGRG5	24.3689	0.730038	1.24757	1.70891	0.0481902	0.359019	0.760035	0.27165	0.981535	0.651557	0.500071	0.512227	2.29195	0.307401	1.0277	0.110154	0.263248	0.631753	0.222962	0.559313	1.338	1.05635	0.801853	0.134415	0.61626	2.28657	1.52887	2.49622	2.3508	0.781882	0.500794	0.628965	0.397414
ENSG00000183722.8	LHFPL6	156.101	4.62932	6.88166	1.48654	0.0526491	2.14824	2.40924	7.45085	4.10679	6.37967	4.73264	3.63893	6.34397	5.87005	3.32425	3.44272	8.0045	2.16805	3.74508	4.17487	3.3662	9.30998	9.25328	3.56185	4.17036	3.75483	9.46653	16.368	7.02397	4.19242	7.3523	7.10457	3.23725
ENSG00000141971.12	MVB12A	114.851	3.75674	4.71536	1.25517	0.0474681	3.36945	4.26763	2.57506	3.09548	2.694	3.54142	2.39866	4.91138	3.78855	3.91199	4.95034	4.28965	2.19994	2.80078	6.0568	3.32227	3.82184	4.44584	6.21046	6.32746	6.77676	4.6225	4.47104	6.47711	3.43812	3.97694	2.76768	3.34162
ENSG00000088826.17	SMOX	152.131	6.57934	4.3262	0.657543	0.182164	10.2814	2.3485	8.11764	7.3885	12.2367	8.79827	2.31	2.05959	8.67964	4.59323	3.20012	10.2343	2.17767	11.471	3.29341	5.49687	5.61974	2.42108	5.07308	2.65233	3.74523	3.03697	3.01278	4.84105	5.8596	6.26716	3.15323	3.76141
ENSG00000185905.3	C16orf54	61.759	1.70452	2.99932	1.75962	0.0523386	1.15141	2.29412	1.44384	1.81271	1.37445	2.74933	0.908871	5.7239	1.7149	0.475881	0.311711	1.70271	0.462706	0.403799	1.53751	1.60629	3.10607	2.35984	1.72432	1.93765	5.63047	4.85145	4.79263	6.68889	2.57462	0.963655	1.08485	0.370456
ENSG00000004487.16	KDM1A	744.481	28.9019	24.1348	0.835061	0.0301781	29.191	28.1844	26.7194	26.7858	27.829	30.4323	27.6702	27.3165	35.9144	27.7638	26.706	19.0139	43.8941	23.793	30.8142	14.6877	23.0667	22.1511	19.3275	29.3164	16.2688	23.6999	20.7683	18.0035	26.7622	38.2223	26.5807	33.5974
ENSG00000185523.6	SPATA45	7.78908	0.230243	0.54888	2.38391	0.143468	0	0.244166	0.136595	0	0	0	0	0.420744	0.50788	0.270125	0.159244	0	0.214893	0	0	0	0	0.370944	0.518178	0	1.85576	0.604501	0.365434	0	0	0	1.03916	1.08145
ENSG00000166532.15	RIMKLB	252.021	10.8401	7.09386	0.65441	0.0273156	5.93153	10.4067	8.68476	13.4338	4.51433	9.78173	8.01783	21.7985	9.51141	7.07284	5.8617	25.3806	13.9657	7.72057	9.01915	5.54019	7.91421	6.43516	12.0467	3.83551	6.07381	5.74031	9.86871	3.92439	2.82327	8.00751	13.7265	4.98392
ENSG00000091732.16	ZC3HC1	107.342	3.56498	4.359	1.22273	0.0739598	4.5355	2.99535	3.37437	2.91168	2.33119	5.27608	2.1256	4.20702	3.17926	3.81316	4.62965	2.26581	3.82797	3.16336	3.33879	3.56577	3.77574	4.95582	5.26834	5.92209	3.97624	5.05394	4.11456	3.64672	1.86499	3.35793	3.95831	5.90652
ENSG00000163933.9	RFT1	108.158	3.64493	4.32954	1.18782	0.076989	3.03075	2.88158	1.88914	3.93866	3.77388	4.92612	3.36578	4.71336	4.26126	3.76079	3.17141	3.80962	3.18996	2.73413	3.72756	3.10208	3.96187	5.54064	4.25212	4.3809	4.74812	5.01622	3.77366	2.23076	5.7225	4.19198	4.82253	3.24062
ENSG00000040487.12	PQLC2	83.2227	2.64146	3.56929	1.35126	0.0750042	3.71544	2.71382	2.21299	2.36358	3.3553	2.69783	1.44777	2.61563	2.48759	3.46034	1.79994	1.14708	2.79329	2.526	2.78532	1.41338	2.53956	1.78194	2.63565	6.41488	6.81713	3.38789	3.09789	3.61809	3.25212	4.41888	2.87117	2.85221
ENSG00000148704.12	VAX1	8.53069	0.264095	0.566867	2.14645	0.1063	0.151245	0.0213455	0.0119415	0.0261155	0.0748593	0.216686	0.013997	0	0.2775	0.495914	0.0556858	0.532318	0.0563593	0.0225428	0.504908	0.0512421	0.245524	0.275645	1.04191	0.103846	0	0.92482	0.351418	0	1.22172	0.278482	1.57466	0
ENSG00000198854.5	C1orf68	20.3036	1.29002	0.288716	0.223808	0.0500573	1.29144	0	5.9722	0.955678	0.182628	1.0279	4.0977	0	2.09868	0	1.52834	0.695708	0	0	0	0.0625056	0.89848	0.0988924	0	0	0	0.161158	0	0	0	0.308814	0.923455	0
ENSG00000006712.14	PAF1	629.75	24.6543	20.2104	0.819754	0.0721902	19.7525	13.6607	24.0149	30.8772	25.7243	18.5944	25.4158	21.6647	34.6037	33.5049	36.2115	16.4149	18.014	21.4691	28.3916	19.2761	24.2886	18.7838	13.0215	27.1092	24.0209	17.3977	18.5048	20.9562	21.0475	23.3419	16.8177	16.8698
ENSG00000153563.15	CD8A	49.1388	1.33148	2.45897	1.8468	0.0415588	0.38543	1.32591	1.25529	1.12307	1.07308	1.18876	0.423578	3.98375	2.36903	0.639411	0.443463	1.87736	1.25672	0.323142	0.804185	0.53866	6.82392	4.31281	0.937968	0.716728	1.29199	2.88286	4.22331	3.5425	1.48803	1.00806	1.20578	1.69405
ENSG00000124772.11	CPNE5	78.4682	2.20755	3.70423	1.67798	0.0450053	1.99145	0.526981	1.34304	2.24466	2.7106	3.98467	1.11347	5.53261	2.13141	1.33876	1.09473	1.59929	1.80368	1.29859	2.89932	4.02012	2.55932	3.46929	1.07696	2.02569	4.63574	6.04024	10.2533	4.50608	2.39851	3.1251	1.7721	0.97254
ENSG00000160961.11	ZNF333	56.2841	1.82856	2.43506	1.33168	0.0359892	1.40234	1.48968	0.976249	0.976379	1.79867	1.40421	1.04661	2.5395	1.77065	1.5068	1.03402	2.8052	1.54521	2.07892	3.55391	1.60926	1.43199	2.51374	2.90177	3.34756	3.80103	2.75293	3.3284	1.76092	1.82706	1.70372	2.12844	1.24892
ENSG00000165802.22	NSMF	310.817	8.53103	14.2809	1.67399	0.0524421	10.8713	7.19354	9.44171	13.9709	7.67424	13.1637	3.69449	5.65614	7.40303	5.28702	6.52886	10.9769	4.05103	14.3175	6.23511	19.8652	8.47681	7.41314	27.4102	39.6464	15.0545	6.61635	5.53374	9.45548	21.3824	7.24905	8.17126	8.07678
ENSG00000198844.11	ARHGEF15	45.0527	1.41746	2.04544	1.44303	0.0345847	0.95908	0.676783	1.14891	1.42762	1.37499	1.10556	1.20895	2.21181	1.61406	1.49748	1.76558	1.37183	0.944815	1.30625	1.14821	1.25493	1.24822	1.32956	1.53535	2.45994	2.92667	1.60334	5.09951	2.69395	1.4143	1.19019	1.42363	1.11118
ENSG00000145088.8	EAF2	139.072	3.94539	6.36088	1.61223	0.044925	3.75882	2.86184	1.71817	3.67216	3.13337	6.21972	4.89751	7.27696	4.86388	1.54445	2.73143	2.23806	3.87026	1.69547	7.1987	7.10474	7.3062	4.18873	3.8515	3.50901	6.49884	17.4108	9.82006	3.35134	8.57773	5.13277	2.47559	2.16413
ENSG00000114013.15	CD86	117.134	3.39778	5.30521	1.56138	0.0922815	3.56997	3.20296	3.64411	2.72989	4.01354	3.32856	2.97346	4.74412	4.43533	2.90646	1.92465	5.51311	2.62892	1.6723	2.17925	3.76676	14.6332	4.67467	1.87121	1.28394	2.46174	5.70235	7.91777	6.02926	4.30138	7.25619	3.6249	4.14437
ENSG00000020181.17	ADGRA2	135.582	4.02249	6.00346	1.49247	0.0255808	1.98365	1.78472	3.86649	2.82575	6.49223	2.23012	2.42092	8.05032	6.76042	2.10997	4.7244	4.831	2.07893	4.80444	3.87392	3.17549	4.25664	5.03735	4.25176	4.59668	5.25296	7.37511	14.2983	8.93713	3.09276	7.84438	4.9645	3.6618
ENSG00000198520.11	ARMH1	14.8853	0.483054	0.803037	1.66242	0.0449571	0.266082	0.225315	0.105041	0.413498	0.210716	0.635349	0.196997	1.16478	0.410086	0.166181	0.171441	0.535138	0.727109	0.198294	0.319777	0.234387	0.280763	0.513459	0.597716	0.121795	1.99791	0.488103	0.786849	1.22758	0.695376	0.267232	0.639289	1.28903
ENSG00000157873.17	TNFRSF14	217.36	6.0918	9.90639	1.62619	0.0640901	2.59005	5.18508	4.93456	10.6215	7.25975	5.8484	3.11345	12.9915	5.06205	3.7583	4.48299	4.565	7.23857	4.95139	7.2743	4.52109	11.1398	7.46988	5.83927	12.1778	28.0844	11.7305	13.0528	13.5769	6.58823	6.36175	4.76297	2.17778
ENSG00000144649.8	FAM198A	8.13605	0.277904	0.520576	1.87322	0.0360387	0.19846	0.0840271	0.0470079	0.137072	0.0392914	0.0947766	0.0550997	0.79637	0.189347	0.0929609	0.146139	0.39914	0.197209	0.0591601	0.132505	0.0806863	0.0966512	0.404246	0.475535	0.681318	0.15966	0.433402	1.59296	0.65809	0.188602	0.298978	0.397351	0
ENSG00000196381.10	ZNF781	13.5527	0.382118	0.816992	2.13806	0.00194641	0.193621	0.0341576	0.152872	0.0417906	0.335416	0.154109	0.179187	0.941759	0.355249	0.0755784	0.267329	0.304224	0.360749	0.577175	0.258549	0.295195	0.275025	0.882185	1.26858	0.387744	0.584127	0.338267	2.14714	0.558298	0.287504	0.486145	1.35682	0.45387
ENSG00000184060.10	ADAP2	151.751	4.85158	6.29057	1.2966	0.0404091	2.4278	2.86631	8.12819	6.52996	6.60905	3.86473	5.03373	6.44366	5.07121	4.55612	4.29746	4.34282	5.16133	2.57476	3.36661	4.57143	5.55175	5.08035	3.60085	6.89214	6.88612	6.91284	11.7849	7.16874	6.7663	3.90753	4.86087	6.49363
ENSG00000160014.16	CALM3	819.36	31.308	27.1185	0.866183	0.0488604	24.6365	27.8631	35.3031	40.3551	30.5793	26.3354	36.2104	28.9126	39.771	26.3527	33.2461	41.0504	25.1157	25.5476	26.8412	22.6951	33.1343	27.3075	35.2863	31.4161	23.4306	23.5435	26.3724	29.4961	20.1912	28.8909	20.6005	28.8755
ENSG00000136444.9	RSAD1	152.441	4.95469	6.22464	1.25631	0.0392657	5.67201	3.35504	4.97223	3.92474	4.47942	6.67222	2.95266	7.48028	3.85664	3.71175	4.58742	3.7221	8.28859	4.66213	4.48316	5.1292	5.01005	5.56655	9.9308	7.82704	7.43742	6.66694	7.84038	5.08088	4.35977	4.95655	6.26269	3.55208
ENSG00000205038.11	PKHD1L1	7.5954	0.241367	0.521146	2.15914	0.0837044	0.0637681	0.260991	0.0503476	0.0660649	0.0694368	0.263927	0.100324	0.263639	0.0655197	0.0995655	0.0469565	0.272529	0.0712866	0.0855404	0.340607	0.41481	0.0776385	0.157235	0.534786	0.0145945	0.598513	1.8215	1.1045	0.30339	0.287852	0.117414	0.0127675	0.029896
ENSG00000100626.16	GALNT16	8.78344	0.305765	0.538228	1.76026	0.00875404	0.0810414	0.22875	0.0191957	0.111947	0.0641786	0.0516027	0.015	1.27123	0.0892151	0.0506141	0.00745948	0.448219	0.261723	0.0724741	0.31383	0.170233	0.57228	0.278019	0.752466	0.445147	0.325987	0.842424	0.907259	0.490726	0.308062	0.0542612	0.486776	0.0633234
ENSG00000139726.10	DENR	841.886	32.2811	27.7284	0.858966	0.0359821	27.9563	25.4627	29.7266	27.8135	31.721	35.0331	36.1123	24.6176	32.878	37.6109	42.2715	32.4944	31.8667	26.7815	40.3711	28.4978	30.858	25.4305	21.6665	23.8115	17.5934	31.8623	22.9586	23.3291	27.3934	29.9129	43.7199	32.1352
ENSG00000205356.9	TECPR1	113.982	3.43692	5.01753	1.45989	0.0890797	4.90522	1.85335	2.40149	5.7188	3.269	3.56606	2.27871	5.22495	2.14723	2.80423	4.40838	1.74779	3.39425	2.63373	3.70056	4.53422	2.66475	3.64381	5.43715	7.58009	11.4451	4.87529	5.93522	6.86318	4.97814	2.19815	1.72062	2.05221
ENSG00000115317.11	HTRA2	118.41	3.75821	4.98746	1.32708	0.044385	3.85051	2.92299	2.57952	4.58355	3.72502	2.60039	2.42964	6.31382	5.05239	2.2773	3.30257	4.76671	3.80449	2.65216	4.0121	4.74385	4.19083	3.90907	6.77119	6.20887	10.0911	5.70782	3.63534	3.86915	2.49494	5.12692	3.09544	3.69248
ENSG00000131871.14	SELENOS	331.543	10.7477	13.3174	1.23909	0.080931	9.99537	10.5636	10.4245	8.74989	10.976	11.7299	12.0468	10.3169	12.7777	13.1747	12.0245	11.0447	8.60417	5.64733	11.64	15.3886	18.0184	11.9616	16.779	8.35248	8.47758	15.9802	13.3551	9.81932	9.1675	9.29931	23.1307	12.0966
ENSG00000170579.16	DLGAP1	32.6962	1.96929	0.458221	0.232683	0.069378	1.48963	8.51139	0.0856401	0.337124	0.171797	0.656132	0.782979	5.39011	0.0689912	5.43076	0.013312	3.92667	0.0988018	0.689787	0.386243	0.240094	0.076302	0.728712	1.46195	0.165499	0.0969577	0.202133	0.351307	0.156381	0.2577	0.0363123	0.781817	0.101705
ENSG00000099958.14	DERL3	164.252	4.37021	7.8076	1.78655	0.0806724	7.70249	2.083	1.21993	4.26073	4.88531	9.91185	1.66469	10.0952	6.49915	1.58432	2.92931	0.753683	2.34888	1.92485	6.18972	9.37584	4.15547	10.4084	1.07062	2.69178	11.1935	18.9562	15.88	6.18416	11.2318	4.01458	2.58567	2.45065
ENSG00000163666.9	HESX1	18.2809	0.61564	0.911257	1.48018	0.121021	0.469074	0.0827514	0.324059	0.607461	0.116085	0.560026	0.705421	0.78428	0.903672	0.457748	0.26985	0.442215	0.801135	0.349571	0.861259	0.278114	1.09461	0.81717	0.526855	0.26839	1.41513	0.870717	1.23851	0.507208	0.139304	1.07961	1.76093	0.549782
ENSG00000187796.14	CARD9	22.5563	0.690354	1.15392	1.67149	0.0654741	0.392033	1.21722	0.361114	0.631793	0.349267	0.478448	0.241872	1.35066	0.421982	0.28565	0.372876	0.98556	0.535645	0.428498	0.802692	0.433882	0.784901	0.336225	1.64387	2.09355	2.97867	1.13009	1.1041	1.39417	0.651977	0.503096	0.34013	0.306323
ENSG00000243414.5	TICAM2	7.08891	0.295391	0.41985	1.42133	0.0849562	0.107942	0.190425	0.340899	0.372766	0.507548	0.214786	0.149843	0.0984416	0.297072	0.126403	0.124194	0	0.167595	0.160885	0.0720693	0.146283	0.525683	0.26037	0.282889	0.432328	0.578925	0.235726	0.684006	0.350151	0	0.180681	0.270148	0.210857
ENSG00000150867.13	PIP4K2A	324.018	9.86947	13.752	1.39339	0.0675676	7.94888	11.3884	9.50905	6.95177	7.63019	7.86053	6.8627	15.44	18.1578	10.074	11.7667	9.42934	8.09963	4.92368	10.4995	7.43805	20.9617	18.5927	6.00355	7.63925	9.91984	17.4341	27.8745	15.0569	9.52427	11.2894	16.7073	9.03422
ENSG00000116194.12	ANGPTL1	11.6416	0.279504	0.78839	2.82067	0.0123305	0.154348	0	0.223417	0.222093	0.10186	0.204751	0.166648	0.187684	0.377589	0.0401656	0.0947132	0.323355	0	0.115026	0.480913	0.83669	0.313201	0.441252	0.231147	0.471003	0	3.75269	1.35843	0.148352	0.366701	0.559777	0.30903	0.160804
ENSG00000130511.15	SSBP4	232.75	7.16219	9.85514	1.376	0.0542477	7.12337	2.11868	4.20653	6.60738	5.09919	8.10629	4.87615	7.80286	5.94077	8.27271	13.9805	8.58398	7.45868	4.47502	11.2808	6.08337	8.31441	5.77483	14.3706	17.6505	15.2345	6.40245	11.9998	9.7607	10.9795	8.67172	6.83642	4.738
ENSG00000152760.9	TCTEX1D1	11.4356	0.38402	0.651944	1.69768	0.0463983	0.395346	0	0.312142	0.0975203	0.307493	0.404574	0.261338	0.446396	0.414495	0.30864	0.233934	0.354961	0.140304	0.168358	0.414793	0.363561	0.481339	0.423834	0.80351	0.19389	0.0757271	0.592021	2.02804	0.366417	0.805086	0.425416	0.395775	0.220652
ENSG00000117054.13	ACADM	194.085	6.1192	8.08441	1.32115	0.0540255	3.00161	7.54254	4.45079	4.80363	5.34473	5.94356	7.53745	10.2598	4.79534	2.94342	8.77708	4.87728	9.29813	5.94692	4.76579	7.97436	4.85781	7.358	4.02918	8.71282	5.64431	11.0955	7.15205	8.76056	13.4798	4.8405	7.6221	12.2703
ENSG00000127951.6	FGL2	228.273	5.58107	11.3352	2.03101	0.0589714	3.68873	9.20437	5.85485	4.03828	4.17852	4.96393	4.36396	12.2078	8.67973	3.44381	3.3428	6.21412	5.83357	2.01214	4.18938	4.99898	42.0711	12.4751	3.16073	1.61014	5.09892	18.1872	17.6716	12.939	7.00196	7.67035	7.08092	6.0914
ENSG00000111669.14	TPI1	3323.31	132.008	103.538	0.784331	0.0366856	112.571	159.102	141.537	148.805	142.567	140.127	130.794	97.4198	116.382	137.342	147.964	68.468	99.3121	222.102	114.125	130.829	137.399	91.0334	158.678	87.4133	48.0811	65.0557	53.8292	106.344	67.8633	155.704	92.1799	150.282
ENSG00000144455.13	SUMF1	99.0367	3.19115	4.15149	1.30094	0.0384815	1.88883	2.22144	1.57085	4.7182	2.90436	1.92433	1.94613	5.34384	2.48596	3.00814	5.38959	3.07067	3.11255	2.15836	4.62406	3.55805	2.71872	4.65734	2.88523	5.41806	5.36909	3.0029	4.36208	3.34043	5.29525	2.02346	4.76501	5.2738
ENSG00000115956.9	PLEK	402.853	10.4819	19.1095	1.82309	0.114848	6.12839	6.5241	15.4335	14.5501	20.9975	11.8581	6.38047	18.9191	8.04538	6.64033	14.1752	6.50797	5.90599	3.50407	10.1588	9.11068	54.1809	26.2233	7.99095	4.65515	11.4756	12.0219	21.0911	38.0458	4.33032	35.9919	5.65904	16.3471
ENSG00000136541.14	ERMN	19.9204	0.680424	0.962617	1.41473	0.0505585	0.67753	0.0281238	0.377604	0.412902	0.611512	0.824763	0.295069	1.30849	0.409494	0.653392	0.293475	0.551066	0.297025	1.24745	0.718461	0.931694	0.841076	1.0468	0.298427	0.364859	0.641259	1.27072	1.72577	0.948084	0.426093	1.00068	0.877755	0.840817
ENSG00000167748.10	KLK1	28.9515	1.51039	0.699668	0.463238	0.186923	2.28239	3.89659	0.290653	2.41545	1.34832	0.996217	0.170343	0.537165	0.513326	4.2534	0.0338845	2.49876	0.137177	1.53632	0.245787	1.04767	0.328681	1.22343	0.16539	0.0842527	0.296157	0.836083	0.233275	0.583815	0.174921	0.6162	1.4004	0.805406
ENSG00000173846.12	PLK3	235.195	7.10569	10.1084	1.42258	0.0712277	7.9514	3.55125	12.397	11.0359	13.2265	6.28872	6.31073	7.83292	6.86973	5.73607	7.15676	2.90988	6.15722	4.20048	3.46086	6.59845	9.84432	5.0175	16.0529	13.0728	17.7466	5.89072	7.97253	15.0915	12.315	11.4985	3.77849	5.22993
ENSG00000172348.14	RCAN2	48.3164	1.41813	2.29572	1.61883	0.0682404	0.0943328	1.29805	1.28478	0.244326	1.51743	1.23886	1.24403	2.40885	2.70003	0.810085	1.88853	1.66005	0.644448	1.19511	1.54308	1.64594	1.0528	2.57882	0.88294	0.539744	1.32808	4.59393	5.6788	3.12805	1.62485	1.61849	2.36088	1.51104
ENSG00000204577.11	LILRB3	59.5429	1.77077	2.75242	1.55436	0.0417014	1.26531	1.38892	2.64555	3.23675	3.78081	1.6785	2.86241	1.05422	1.15218	0.914638	1.01369	0.647974	0.727622	1.22235	1.47059	1.55598	5.68666	2.13521	1.57908	1.44795	4.14715	1.69887	3.2666	5.20245	1.55874	3.49073	0.844457	1.86751
ENSG00000255872.3	AL138752.2	18.3555	0.870932	0.622425	0.714666	0.159215	0.878449	0	1.33379	0.933424	1.30437	0.591619	0.656624	1.23251	0.669495	0.527532	0.466484	1.01926	0.629501	0.553938	0.766977	0.48077	0.548474	0.760643	0.607174	0.0773265	0.543622	0.147567	0.856393	0.876798	0.160541	0.791761	0.676464	0.263998
ENSG00000171817.16	ZNF540	18.037	0.581692	0.931666	1.60165	0.0234001	0.528825	0.545402	0.224824	0.5268	0.322145	0.550419	0.263524	1.45921	0.447817	0.158787	0.37443	0.460195	0.353695	0.303154	0.706158	0.441025	0.528288	1.11206	0.578736	1.02411	0.763605	1.38583	2.44885	0.439859	0.869808	0.340456	0.529399	0.349638
ENSG00000108239.8	TBC1D12	87.9341	2.92978	3.59903	1.22843	0.0378348	1.7455	2.24925	3.30556	2.33691	2.40401	2.47658	3.38294	2.83	2.63634	5.19401	3.08525	2.70285	2.18383	2.94098	2.97266	2.26267	2.89517	3.67476	2.40566	4.71862	3.35799	3.45831	5.71748	2.82655	3.54598	2.83706	4.22921	3.55797
ENSG00000198382.8	UVRAG	178.335	5.68739	7.37111	1.29604	0.0342491	9.6747	2.97589	5.11415	4.21201	5.44336	9.25804	2.67839	8.0607	4.43011	2.8404	4.4145	7.2065	4.45078	7.99052	5.06085	9.74934	5.2687	8.71707	7.63643	5.42518	10.422	10.293	8.52936	6.19924	4.8459	6.29775	6.20846	4.93201
ENSG00000169379.15	ARL13B	207.116	8.39075	6.46574	0.770579	0.0619721	11.0849	9.51741	2.66219	7.31402	7.19709	6.7429	8.89331	10.7627	11.244	6.35048	9.07804	6.56942	7.95756	12.0929	6.89446	6.09743	6.3118	3.16294	10.6987	4.82313	3.50379	10.1247	4.71844	3.49402	8.01081	4.90322	8.90282	8.00274
ENSG00000103507.13	BCKDK	188.387	7.42878	6.13503	0.825846	0.0402871	7.45894	7.91115	7.37036	13.2306	7.38364	5.25318	4.62285	8.98749	6.65194	6.24657	7.78102	6.421	6.00813	6.63674	7.96815	5.31456	6.38447	5.54903	7.85308	8.69076	6.00069	4.30424	6.58857	6.58261	5.90702	5.93999	4.25395	5.08644
ENSG00000144659.12	SLC25A38	175.085	5.89911	6.87682	1.16574	0.0442762	3.7499	5.01856	3.54775	5.7493	6.30408	6.32956	3.97894	8.53	5.88375	5.24929	6.21885	6.82657	5.30027	6.74552	7.55423	6.19902	5.85126	7.17382	7.50382	5.99283	8.84229	7.59611	8.6719	5.73259	7.06581	6.22275	5.43679	5.80962
ENSG00000181619.11	GPR135	98.4785	2.86471	4.48523	1.56568	0.0336594	3.30675	1.39013	2.61082	1.42744	1.56704	5.45989	2.23007	2.95155	2.91737	1.7851	1.19806	6.41168	3.47378	2.67404	2.06688	2.61013	5.02537	5.43068	4.97844	1.85177	3.11307	2.15104	6.87327	2.35836	2.42372	11.4823	5.49375	3.21601
ENSG00000148357.16	HMCN2	12.3679	0.339967	0.774494	2.27814	0.0347544	0.558872	0.194153	0.125587	0.274654	0.144691	0.130026	0.119356	0.439112	0.22401	0.120822	0.0514416	0.367459	0.117477	0.192227	0.539619	0.247607	0.0314046	0.460879	2.07951	1.18069	1.92525	0.548276	0.726453	0.564019	0.510683	0.03598	0.309865	0.147802
ENSG00000075884.13	ARHGAP15	75.8748	2.09389	3.63588	1.73643	0.0390909	1.09672	1.30969	1.72072	1.09252	2.53318	2.88734	1.1581	7.0954	2.11542	1.42699	0.931829	2.12087	1.64169	0.712534	2.06531	2.21989	4.31396	4.73314	0.736984	1.06194	4.44924	5.58843	9.71176	4.92597	2.13793	1.97699	2.30843	1.80179
ENSG00000172349.17	IL16	83.0742	2.27901	3.97608	1.74465	0.0256886	1.78064	1.03178	1.59449	1.72479	2.39321	1.57858	1.05841	8.21202	2.37459	1.2545	1.2992	2.42021	1.26772	2.29798	2.39708	2.19732	3.11386	3.8955	1.77776	1.375	7.02671	6.60113	9.49469	6.60584	2.42478	2.5565	2.08691	1.23298
ENSG00000111142.13	METAP2	911.983	35.0565	29.9181	0.853424	0.0630984	32.2406	24.9242	34.0584	49.4431	24.7371	44.248	37.9368	23.7263	36.222	41.9394	39.5441	31.8034	37.7464	37.5366	28.2415	37.0093	31.4375	30.0709	33.6578	35.8235	25.7702	29.1336	24.1688	19.925	24.2667	25.8414	38.6371	31.8935
ENSG00000166483.10	WEE1	249.394	9.98067	7.88336	0.789863	0.0674392	16.9605	6.16469	7.32393	7.44411	6.71572	12.5793	11.566	12.1207	13.421	10.1192	7.326	5.4072	7.9913	12.2018	10.8685	8.45563	10.4594	8.95927	10.174	10.6476	6.09817	5.79377	8.48595	5.20468	6.70833	5.48763	7.37966	7.32958
ENSG00000135245.9	HILPDA	232.357	10.6706	5.77672	0.541367	0.0892029	34.4243	5.13291	6.11036	4.81948	8.87503	15.8876	18.0424	2.41694	2.57608	14.3947	13.741	2.44528	7.82688	13.6781	8.18839	4.41302	2.57445	8.52347	9.0566	9.19495	6.69106	2.17956	5.3597	6.9507	2.41137	7.07885	5.92706	3.43662
ENSG00000143486.15	EIF2D	175.866	5.88669	6.95118	1.18083	0.0482952	6.47003	8.16605	3.12845	5.17351	3.84713	5.66814	4.90269	6.61341	6.97122	5.59345	4.38659	7.9963	6.37799	4.69227	6.81315	7.069	5.41017	5.69098	7.51088	6.83248	6.98673	8.32591	5.91601	5.1805	6.57677	5.61489	8.97659	8.97437
ENSG00000268916.6	CSAG3	42.0743	2.33571	0.756825	0.324024	0.00632143	0.646655	0.228159	2.61663	6.42031	3.84076	0.38602	0.224418	0.29487	0.474584	0.631041	4.0177	6.29948	1.30523	2.04812	4.10163	3.17676	0.590483	0	0	0.369996	1.7341	0.282436	1.70738	0	0.192041	0	0.485517	0
ENSG00000156990.14	RPUSD3	96.15	3.15931	3.96618	1.25539	0.0467356	2.12796	2.37947	1.82228	2.96773	3.58101	3.54376	2.63586	4.55808	1.69387	2.58134	2.36549	3.78589	2.46018	5.34304	4.04372	2.17395	2.59081	3.3342	5.22141	4.34573	5.61865	2.60236	4.18363	4.36591	3.53894	4.46611	4.62104	3.19755
ENSG00000196152.10	ZNF79	219.797	6.8188	9.25498	1.35727	0.0424511	6.31268	6.54771	6.1551	9.65247	4.74318	7.08268	3.51933	7.72235	6.50282	7.71888	2.87026	11.759	5.00695	7.36841	7.82017	6.49353	7.3771	6.84909	12.0734	19.4957	14.5829	7.20846	8.27354	8.44325	8.58304	5.02869	6.16725	8.43882
ENSG00000225697.12	SLC26A6	126.889	3.93501	5.43565	1.38136	0.070974	3.92856	2.94669	4.067	7.58984	4.9903	3.95778	2.72041	3.20697	3.88122	2.95972	3.07238	3.79857	2.81522	4.19707	3.39335	2.03838	6.29938	3.69623	5.26618	10.2487	9.6878	2.97574	4.52627	4.19842	3.52454	8.18539	4.8954	3.82098
ENSG00000100359.20	SGSM3	20.7797	0.729963	0.971557	1.33097	0.0690826	0.623981	0.569822	0.47817	0.602091	0.454178	0.876435	0.458575	1.11581	0.592633	0.515787	0.320958	0.922749	0.683873	0.79326	0.441118	0.758572	0.685224	0.49187	1.09936	1.21808	1.87016	0.993942	1.00789	0.978989	0.566824	0.829428	0.514424	0.315481
ENSG00000181481.13	RNF135	137.715	4.57273	5.53261	1.20991	0.0750002	5.67304	3.41655	3.62962	5.36225	3.72771	4.78783	5.09172	4.22225	5.74273	5.4597	3.60122	4.54905	4.16112	4.00909	3.65709	5.31872	3.37411	4.77109	7.9465	8.39468	7.08197	5.06236	6.55964	4.72407	4.29904	3.15167	4.89586	5.04417
ENSG00000145428.14	RNF175	12.0856	0.36154	0.727883	2.01329	0.029601	0	0.168858	0.0944655	0.103296	0.0986983	0.412663	0.0553633	1.13965	0.073174	0.529298	0.146838	0.350918	0.123845	0.38638	0.239651	0.486433	0.080928	0.70547	0.38822	0	0.427798	0.418056	0.842413	0.287495	0.23688	1.46866	1.91641	0.903716
ENSG00000127528.5	KLF2	155.22	4.55297	6.90193	1.51592	0.0530006	7.63488	2.20403	4.24705	3.07107	5.58247	4.41953	4.25549	10.2861	3.69307	3.31888	3.35406	7.30677	1.23931	2.06902	4.1128	4.67371	4.40131	5.48769	7.92571	6.75124	12.7963	8.26082	12.0952	12.7586	3.50413	4.21153	2.77933	2.77947
ENSG00000138468.15	SENP7	252.876	7.92015	10.5288	1.32936	0.0169279	7.14452	7.59136	4.21447	6.3809	7.4653	4.88041	7.05524	16.9924	10.0147	4.9365	4.79987	7.29456	7.90528	12.2195	8.40718	8.96816	7.88757	10.4912	13.2616	7.76853	9.54285	10.9994	21.0755	8.26799	8.81219	8.22469	10.2214	10.0528
ENSG00000106070.18	GRB10	269.618	12.0344	7.06942	0.587435	0.0394485	9.40204	12.7773	3.80339	10.9876	5.149	7.25576	9.23876	10.1069	8.15301	9.489	4.70548	23.4343	23.6788	33.4353	7.39926	11.6213	4.85305	8.58485	5.68832	5.37957	4.84128	3.07595	10.7793	6.37815	4.35284	3.78486	9.12594	12.1371
ENSG00000113356.11	POLR3G	83.1801	2.59772	3.61649	1.39218	0.0994716	2.2653	2.52076	2.68283	3.38494	2.13462	1.56031	3.48733	1.29783	3.26109	2.24462	2.94722	2.84746	2.70555	1.91545	2.21053	3.21754	2.40444	4.22658	3.52294	3.4896	1.98598	1.50313	1.33426	2.51227	3.51896	7.47428	3.75053	6.77382
ENSG00000090776.5	EFNB1	819.556	34.8633	23.0313	0.660616	0.139196	29.6382	14.6513	79.0865	37.6295	72.7198	40.9986	41.9009	7.54838	28.4012	25.5714	25.384	51.7317	23.624	28.7019	13.8625	21.0315	35.313	32.0287	24.052	15.5373	22.1012	19.4058	13.447	23.9929	21.0868	25.0263	18.458	26.626
ENSG00000162739.13	SLAMF6	86.0484	2.25754	4.22964	1.87356	0.082527	2.35908	2.56454	1.00681	1.3211	2.3037	2.89262	0.796578	8.17937	2.36305	1.24439	0.352122	2.80504	1.62351	0.380124	2.17105	2.7866	4.16599	5.91255	0.429676	0.802579	5.6423	7.01759	11.9188	6.25076	3.55976	2.18785	1.91484	1.09603
ENSG00000173040.12	EVC2	140.826	4.1596	6.24864	1.50222	0.0631859	3.71838	2.8706	3.06128	4.96629	5.1752	5.31207	2.27942	8.50194	3.27706	3.49834	0.672818	1.03866	6.94773	6.15795	3.41628	4.167	1.76702	4.92327	2.64149	14.6928	7.79815	6.4407	6.14239	5.15471	3.39776	8.59138	7.85843	6.3572
ENSG00000106809.10	OGN	16.1032	0.357053	1.04211	2.91863	0.057017	0	0.260414	0.0624365	0.0455153	0.182656	0.251767	0	0.609008	0.541677	0.0823147	0.0727889	0.728946	0.16371	0.432175	0.42239	0.553705	0.0213956	0.508666	0.157903	1.14625	0.212063	4.23679	3.1737	0.798077	0.939389	0	0.211107	0.288355
ENSG00000005893.15	LAMP2	546.349	21.8109	17.0759	0.782907	0.0540728	17.9961	19.1604	32.4198	9.84732	34.3273	24.8395	27.0489	18.2037	23.6246	22.7558	18.883	18.7976	17.9062	21.9352	17.9173	14.5665	19.7503	23.3858	11.9806	6.01857	7.30686	24.2721	14.0539	15.3252	18.8936	17.1034	23.4711	24.5584
ENSG00000163938.16	GNL3	806.147	26.9216	31.1633	1.15756	0.0295475	21.318	22.7137	22.3933	24.9194	24.8375	32.5493	32.9382	25.1844	23.1776	29.9072	29.7976	22.4851	25.4635	20.2126	44.4262	26.4052	26.426	27.7756	32.0833	40.3363	30.9892	25.3515	25.9141	31.3053	34.35	35.5952	32.6984	34.5927
ENSG00000169291.9	SHE	44.1205	1.33112	2.07336	1.55761	0.020476	0.477062	0.658649	0.884334	0.823741	0.872628	1.04007	1.04616	1.80335	2.64872	1.06873	0.811405	3.41546	0.772912	1.03566	1.10789	1.286	0.892288	1.4009	1.22697	1.92259	2.44738	3.0711	5.03841	2.54185	1.47836	0.746462	1.64038	1.96106
ENSG00000185532.16	PRKG1	59.1189	1.79577	2.69095	1.49849	0.0718821	1.03704	0.625876	2.10621	0.859981	1.8978	1.28156	1.38277	2.51374	2.49857	1.25701	1.28738	3.19025	0.855921	2.93882	1.70366	1.17424	1.87176	4.14717	1.14434	1.09303	1.61003	3.12886	5.76446	2.06563	1.13465	3.35753	4.34389	2.84675
ENSG00000164011.17	ZNF691	139.963	4.61857	5.65265	1.2239	0.034995	5.58954	3.15545	4.10766	3.26664	3.95831	4.17512	3.74037	6.69222	4.89108	3.6252	4.67	3.24276	8.11781	3.78103	4.76542	6.26392	4.4322	4.70166	5.92392	8.06923	7.4946	5.59624	6.26658	3.4714	4.59682	4.1743	5.07909	6.11452
ENSG00000115307.16	AUP1	975.789	32.228	38.09	1.18189	0.047052	25.7239	24.3906	24.5873	38.736	32.7678	24.4424	28.4198	39.2816	49.7827	36.8952	24.3506	38.4338	34.9656	27.9878	31.1546	44.7023	41.3002	30.0715	46.3376	44.1172	50.5336	35.2154	29.9056	31.9598	33.0053	46.6188	26.5503	33.5518
ENSG00000104907.12	TRMT1	247.315	6.90771	11.2691	1.63139	0.0610513	7.39049	5.76606	5.09544	8.58231	5.43539	7.04223	4.5035	7.97412	6.97089	8.24814	9.10207	4.84114	3.5879	6.94277	10.6333	7.67041	6.23102	6.33285	23.5776	26.5033	25.541	5.68292	7.25567	8.85422	5.37881	10.1492	6.04385	5.97806
ENSG00000101230.5	ISM1	78.2927	2.17069	3.73326	1.71985	0.0430828	0.540167	1.33411	2.37232	0.757822	3.50906	0.967357	1.84338	6.97886	2.50248	1.10696	1.70912	2.97055	1.2161	1.35862	1.89342	0.777789	5.20648	4.05363	3.33688	2.47254	1.26747	2.56569	4.63522	3.35847	2.08542	6.78129	9.53078	1.1607
ENSG00000150779.11	TIMM8B	358.499	11.7708	14.2105	1.20726	0.0991112	9.60998	9.43033	10.3142	10.3709	9.58728	11.2343	12.3676	9.58581	10.6343	10.9019	15.687	15.2883	10.4446	16.6734	12.9328	17.602	20.7802	14.8098	17.0901	14.7773	7.04665	15.6087	8.08781	17.1022	9.81041	13.4468	13.0777	14.1966
ENSG00000145850.8	TIMD4	10.8817	0.306591	0.698681	2.27887	0.00314591	0	0.79452	0	0.0972067	0.167184	0.71693	0.0520996	0.684554	0.165265	0.0878993	0.0518182	0.141528	0.139853	0	0	0.801077	0.594027	0.060353	0.42154	0.128844	0.452902	0.245882	1.90261	0.811641	0.401249	0.659631	1.12715	0.175954
ENSG00000154640.14	BTG3	317.812	13.0086	9.65251	0.742007	0.208152	2.04996	12.0012	5.96458	11.9955	12.5514	21.0299	11.699	11.0326	14.9055	16.8335	20.2317	7.25314	17.4468	16.0126	12.6224	5.35044	16.4233	8.34303	11.8251	10.9473	7.63511	13.2644	6.25453	7.16979	10.372	5.7825	11.8571	8.95811
ENSG00000148343.18	MIGA2	166.598	4.55978	7.76936	1.70389	0.0608679	5.38969	3.99933	2.91736	7.79528	3.45143	4.55518	2.32683	5.52341	3.91475	5.98614	3.52893	4.74933	3.76141	3.93379	5.0639	7.46415	3.34866	4.66117	11.6287	17.8353	22.2014	5.65452	6.10301	6.02813	4.88434	2.48793	3.86588	3.53841
ENSG00000122884.12	P4HA1	653.996	27.0904	19.2646	0.711121	0.0635993	35.4918	30.837	17.5195	30.0554	39.4202	25.0953	47.095	21.0281	22.2049	9.14759	45.3557	15.7248	18.7027	33.1572	14.0215	11.8904	26.5106	36.7446	19.6246	13.7326	6.60317	11.1502	20.6252	14.7714	11.4984	25.3459	23.5736	27.0689
ENSG00000103495.13	MAZ	1195.42	46.5242	38.489	0.827289	0.0398565	45.6192	48.7633	26.4121	46.2011	32.5706	39.5709	34.4267	56.9607	48.1484	45.1711	57.7425	51.4389	53.1267	51.7963	58.4148	35.1438	38.7313	21.1053	35.6182	73.2455	36.5128	34.6993	40.4226	40.2691	36.6815	33.664	33.4137	39.5498
ENSG00000162009.8	SSTR5	6.23142	0.182863	0.483729	2.6453	0.0660404	0.128548	0.0907106	0.0507469	0	0	0	0	0	0	0	0.059161	0.646331	0	0.0957985	0.171654	0.130656	0	0	0.673783	1.91233	0.861799	0.56145	0.543053	0	0.305405	0	0	0
ENSG00000166432.14	ZMAT1	66.9356	1.91089	3.1594	1.65336	0.0389163	0.932029	0.674137	0.763472	0.865016	0.911088	1.24257	0.765512	3.78249	1.52195	1.49162	2.01604	5.27197	1.93913	2.91725	2.0691	1.41308	1.47519	3.22239	2.30304	2.47975	5.65484	4.64068	7.82556	2.75465	2.54648	0.546035	2.9624	1.9481
ENSG00000140030.5	GPR65	39.9293	1.19998	1.90228	1.58526	0.0739787	0.774355	0.846967	1.36033	0.568257	1.47559	1.54084	0.895786	2.91897	0.994532	0.725432	0.784034	1.41136	0.745425	0.346247	1.11157	0.957586	2.79694	2.30368	0.492853	0.443063	1.81698	2.28292	4.78426	2.62356	1.01185	1.42579	1.00775	1.4824
ENSG00000174123.10	TLR10	30.9346	0.767189	1.70975	2.2286	0.104656	0.954916	0.791034	0.622825	0.179223	0.554836	1.02441	0.211327	2.65048	0.487526	0.453775	0.0955386	0.574065	0.747769	0.216586	0.443524	0.956513	1.33112	2.20323	0.34197	0.0475108	2.17107	1.90403	4.7795	5.32734	0.591835	0.555968	0.457194	0.259529
ENSG00000120333.4	MRPS14	251.464	8.13628	10.1708	1.25005	0.0685963	8.36937	5.42963	4.90269	4.77827	6.78157	8.64914	7.37067	10.7105	7.67791	5.63806	7.85893	11.6231	8.84475	11.7701	10.1394	11.4337	7.20409	12.3733	8.64222	5.63831	7.51141	12.4403	12.4033	6.08183	11.5456	8.24738	15.7434	11.6552
ENSG00000120318.15	ARAP3	110.887	3.55128	4.64751	1.30869	0.064417	2.34914	4.19416	2.01117	4.6427	2.96982	1.89228	2.85504	3.44158	4.38282	2.93872	2.82659	3.37976	6.89047	4.38722	2.60777	5.48493	7.36277	1.98742	3.28489	4.30762	6.41342	3.74559	5.64952	5.52909	2.31986	4.47698	5.32672	3.2288
ENSG00000130956.13	HABP4	76.2976	2.48517	3.21693	1.29445	0.0636972	2.58997	2.37592	1.8404	3.35406	1.9015	3.5388	1.1585	4.04167	2.83535	1.85345	1.33104	3.41833	0.670216	3.02389	1.84452	2.14983	4.29202	3.03111	3.91099	2.61803	2.48876	3.07311	4.10302	3.04946	1.23065	4.62429	3.28418	2.66457
ENSG00000117143.13	UAP1	395.688	12.7261	15.969	1.25483	0.111272	10.8503	12.0061	14.5394	12.4461	14.5227	16.6235	17.6314	9.50817	11.6455	10.6181	16.3171	11.3976	8.19395	9.4527	13.6385	13.8932	26.5861	14.2534	12.4729	8.97712	6.55699	18.1773	11.6745	16.6713	20.4531	22.6385	17.1855	16.7572
ENSG00000148334.14	PTGES2	348.127	9.51804	16.0121	1.68229	0.0549653	13.5963	7.3584	7.93745	18.0552	6.87212	12.6101	6.87787	8.93198	7.18786	9.89482	6.6286	11.4419	6.72667	8.45807	8.69318	16.5325	7.52867	8.21448	29.4638	41.732	37.3104	10.7193	8.88345	12.0853	9.44433	6.9915	8.36275	9.58843
ENSG00000168899.4	VAMP5	179.001	5.50377	7.63419	1.38708	0.0928497	3.20663	6.03408	6.32942	6.45968	4.23234	3.74331	3.0665	10.2679	6.35407	2.50336	10.232	6.18039	2.65533	4.93871	4.85284	4.49048	12.5799	7.6775	4.32195	5.87115	10.8921	11.8579	10.1599	7.85924	6.60256	8.23014	5.56418	1.83742
ENSG00000163154.5	TNFAIP8L2	48.0293	1.29788	2.41239	1.85871	0.139679	0	1.99271	0.821427	1.66811	0.956318	2.01104	0.756506	2.53018	1.30893	0.928241	0.820821	1.12093	1.38458	0.775334	0.893096	0.805675	2.95559	1.9917	0.445158	2.04095	3.38779	2.2071	7.69148	4.60699	1.76554	1.3683	0.446363	0.348397
ENSG00000175206.10	NPPA	7.24441	0.284765	0.444071	1.55943	0.00860783	0.156323	0	0.185135	0.674805	0	0.124423	0.0723347	0	0.688358	0.122039	0.35972	0	0.388342	0	0	0.158887	0.444092	0.251381	0.351158	0.178887	0.419204	0.273105	0.165098	0.450751	0.742788	0.392497	0.156493	0.488586
ENSG00000196405.12	EVL	285.736	8.23558	12.6924	1.54117	0.0637917	9.47858	2.05894	5.19957	9.23647	4.88726	7.03261	2.95959	18.8321	9.6724	10.038	4.02849	10.0289	13.1965	5.15964	10.2247	3.23928	14.9054	11.3368	14.5528	13.997	20.9535	9.65498	30.502	15.5193	6.52081	8.609	8.3337	5.57726
ENSG00000187097.12	ENTPD5	92.6366	3.04406	3.8289	1.25783	0.0682392	3.30629	2.39263	2.61712	2.50495	2.32945	4.43073	2.92712	3.11786	3.47882	3.81908	2.30576	3.30781	2.74485	1.74741	3.13105	2.12033	2.90271	3.65304	2.08414	2.91486	3.68676	3.42598	3.26028	3.721	6.17189	3.346	4.79595	6.39271
ENSG00000115275.12	MOGS	347.055	11.4413	13.7104	1.19833	0.0501154	10.0633	8.65249	8.1961	12.99	10.4211	10.8481	7.50473	17.88	15.1833	10.0301	11.4886	13.8161	11.893	10.1936	10.959	12.082	12.3117	13.4332	17.0824	17.3296	17.6852	19.5868	12.5887	12.3252	10.6776	12.3882	10.8567	8.58842
ENSG00000134339.8	SAA2	38.261	2.15101	0.676605	0.314552	0.0844045	0.393089	0.166432	0.0620721	2.85073	2.2569	0.56317	3.52871	4.77989	0.461584	0.491005	2.13474	2.47054	9.91171	0.117178	0.577395	1.30515	0.127624	0.505697	0.470944	0.0899654	0.527063	1.6482	0.498185	0.170018	0.747124	0.32899	0.708328	0.368578
ENSG00000140830.8	TXNL4B	147.595	4.9294	5.88111	1.19307	0.0839087	3.7557	3.66356	4.38251	4.81603	6.17808	4.04432	3.32238	5.77574	4.6817	5.73467	6.22758	5.34568	3.19004	4.98037	6.34264	7.76559	3.16048	4.91448	6.90648	6.88911	5.92439	5.86185	6.35809	3.54344	7.61065	4.89982	4.97617	6.34391
ENSG00000065989.15	PDE4A	70.673	2.27653	3.025	1.32877	0.0622066	1.87042	2.34232	1.38318	2.36537	2.21663	1.5726	2.42581	2.38651	1.75939	3.12607	1.21242	4.5035	0.981666	2.86634	1.63577	1.94573	2.17035	2.8101	4.04383	1.32644	3.285	3.24472	4.67421	2.88654	3.25459	4.63012	1.345	2.40838
ENSG00000103168.16	TAF1C	285.615	8.24843	12.6684	1.53585	0.0441926	8.03674	7.68713	6.23381	16.5874	6.55717	7.32123	5.41843	11.0514	6.95805	6.07809	7.85979	4.22236	5.73218	11.6042	10.8785	10.6468	4.42102	7.63984	15.2091	30.8595	27.6132	9.54325	12.0024	10.0027	11.3369	7.33056	8.51688	8.26662
ENSG00000130714.15	POMT1	110.091	3.16295	5.03433	1.59166	0.0327187	3.17438	2.58622	1.40126	2.84026	2.02824	3.37645	1.1751	3.36872	4.95591	2.2529	2.73594	6.56563	3.10059	3.01086	3.37182	1.93587	3.08017	4.05281	7.82229	14.6294	6.61661	4.19719	4.35834	3.16201	2.77673	2.41523	4.68008	4.41958
ENSG00000152689.17	RASGRP3	57.3719	1.76341	2.59391	1.47097	0.099579	1.46453	0.833431	1.91474	1.5771	1.74593	2.33133	1.44279	3.64785	1.7856	1.32774	1.39876	1.42521	1.2812	1.10316	1.67175	1.1631	2.5436	3.02194	0.931536	1.00915	3.80066	4.03738	5.53831	3.85964	1.75843	1.89788	1.70259	1.15664
ENSG00000184389.9	A3GALT2	9.38677	0.321743	0.566201	1.75979	0.0814255	0.342291	0	0.20269	0	0.338835	0.40866	0.0791934	0.20811	0.188407	0.13361	0.866423	0.215128	0	0	0.342804	0	0.416743	0	0.128152	0.979243	0.688428	0.299001	1.44602	0.370118	0.406609	0.716189	0.342662	0.267456
ENSG00000206384.10	COL6A6	30.214	0.887038	1.51603	1.7091	0.118915	0.324225	0.406742	1.3795	0.373226	2.63003	1.33332	0.583441	0.262835	1.02451	0.646856	0.356463	0.271698	0.794264	1.03362	0.384844	0.805551	2.88751	2.53933	0.364164	0.494699	1.47325	0.448432	3.25304	1.96067	1.15545	1.46231	0.0721283	1.4919
ENSG00000149534.8	MS4A2	54.6485	1.53088	2.65271	1.7328	0.086151	0.629083	1.49822	2.46792	0.271559	0.778416	2.22189	1.01883	3.58572	2.85669	0.859451	0.343806	2.91589	0.68372	0.439516	0.892539	0.719327	3.11154	5.98542	0.353287	1.07983	2.53047	3.60624	5.73041	3.3161	2.80234	0.92138	2.32226	0.7066
ENSG00000162692.11	VCAM1	109.267	3.06429	5.08485	1.65939	0.0492897	1.01304	8.37405	4.6619	1.07451	2.82219	2.39589	1.70092	7.74296	4.47146	1.64951	1.33208	2.6559	1.29426	2.13544	1.14017	3.23605	11.5586	6.37657	1.19201	1.12614	3.5316	4.07062	7.36704	6.98965	1.68475	7.31571	4.72298	5.63138
ENSG00000197599.12	CCDC154	24.8599	0.75143	1.26065	1.67767	0.1023	0.38536	1.67692	0.405677	1.2199	0.445048	0.30672	0.297193	1.05433	0.777749	0.651829	0.472941	0.80732	0.478661	0.191456	0.600348	0.26112	0.860164	0.447555	1.15421	3.45436	2.32515	0.981816	1.2888	1.20377	1.14443	0.645043	1.22163	0.10037
ENSG00000170473.16	PYM1	299.941	11.88	9.58009	0.806406	0.0427654	7.00327	17.1184	12.0848	11.6562	9.8271	9.5967	13.3967	9.83274	12.1075	13.9784	17.8765	8.077	12.6896	7.90936	13.5455	8.19442	7.82335	8.93983	9.19045	6.27911	10.9391	9.2394	7.39638	17.4352	10.8922	6.70725	11.3475	8.857
ENSG00000161551.14	ZNF577	95.283	2.79456	4.32036	1.54599	0.0621083	2.91414	3.61925	0.598218	3.40152	1.927	1.92979	2.12516	3.4585	1.5142	0.236603	2.68233	3.10626	4.43052	3.50952	4.96537	3.23839	2.03419	3.99889	7.1572	10.8847	6.59562	4.16458	4.25957	2.20154	2.18781	1.87312	3.66414	2.60492
ENSG00000181031.15	RPH3AL	87.9566	2.04142	4.62579	2.26596	0.253449	1.09679	2.26077	0.808988	1.14626	0.885714	3.03241	2.00334	0.912513	1.22859	3.44751	3.81234	3.22894	1.27271	0.881896	3.10259	0.635618	0.55054	1.68637	1.92348	11.6592	9.40409	3.16417	3.59699	3.57866	16.046	0.193251	4.99868	1.39826
ENSG00000171161.12	ZNF672	198.097	6.23247	8.26228	1.32568	0.0413815	10.0622	5.54826	3.43646	4.32337	4.3317	5.92279	6.51844	8.08107	6.40578	8.1842	3.66163	6.05928	6.39452	4.46435	8.59302	8.67331	8.28117	5.24309	6.20276	16.7095	13.2406	8.23769	6.22791	8.19809	7.95008	5.20951	6.23126	5.70474
ENSG00000181409.12	AATK	13.3854	0.489322	0.680427	1.39055	0.0767256	0.562512	0	0.366405	0.388515	0.932695	0.402949	0.403448	0.478803	0.237378	0.395229	0.323604	0.388889	0.279482	0.398245	0.281678	0.514564	0.159802	0.331675	0.505442	0.804631	1.24448	0.589644	0.47527	1.03401	0.501158	0.729719	0.281561	0.373601
ENSG00000163599.15	CTLA4	118.821	3.24394	5.61243	1.73013	0.0290581	1.06358	2.02064	3.29437	2.82535	2.79409	3.51639	1.17358	11.9879	2.49181	4.27934	0.866018	6.5817	1.47352	1.09747	1.69336	2.02346	12.7168	5.87652	2.63423	1.12347	6.1431	8.57601	9.41829	4.65916	2.42968	6.64188	6.79792	2.62101
ENSG00000146054.17	TRIM7	104.875	2.8351	5.0114	1.76763	0.115428	3.31648	1.54898	1.94033	5.02619	3.09405	1.31035	1.41318	1.10249	0.700428	5.58804	4.72175	1.43958	1.39291	2.18707	6.24467	12.2144	3.71832	2.87762	8.48624	9.91117	8.60573	1.60484	1.10875	5.43505	4.59156	1.59752	2.91403	0.783015
ENSG00000004468.12	CD38	146.119	4.01126	6.82693	1.70194	0.112501	2.45191	0.865105	1.39142	4.82907	2.45244	6.48485	4.3137	3.49392	5.0985	9.25181	4.61953	1.54101	1.66554	6.5096	3.70044	17.4362	9.31849	7.8447	1.07098	5.34859	3.01362	8.10989	14.1885	3.46134	2.76094	7.97324	5.2671	1.65642
ENSG00000213983.11	AP1G2	373.359	12.0313	15.053	1.25115	0.0684162	11.4233	8.16845	7.34565	12.2731	6.16915	12.5877	9.57331	15.9742	11.7557	15.6164	12.4307	16.4331	11.777	9.95088	17.4912	9.91641	7.89154	21.1048	17.8296	19.6664	23.8941	14.9347	14.692	14.1819	12.9969	13.831	13.2146	10.235
ENSG00000169188.4	APEX2	230.274	9.24485	7.2616	0.785474	0.0754902	7.49965	5.36834	11.6296	6.52139	14.4206	10.4783	5.09308	6.1015	6.73156	11.9624	9.23721	8.27403	8.20964	8.96656	16.6789	8.46353	7.62005	6.56508	7.27206	9.07608	5.49809	8.03577	6.667	6.65083	7.49884	5.73485	9.12817	4.89037
ENSG00000086712.12	TXLNG	245.557	7.97901	9.89783	1.24048	0.0578433	8.8326	6.73142	5.62546	5.89713	4.25514	9.561	10.2631	5.56108	7.6203	10.573	7.33506	9.81951	8.89879	6.46537	10.7461	10.1346	8.6827	7.89088	8.23043	11.6349	7.89532	9.1729	7.42126	5.94263	7.55446	14.0618	16.1124	12.6375
ENSG00000136250.11	AOAH	137.477	3.66407	6.56277	1.79112	0.0504647	9.07831	5.06863	2.36298	2.75613	2.49355	2.50121	1.93882	11.0997	2.89202	2.76482	1.26261	2.25719	1.54894	1.67279	3.76333	3.05884	10.5266	12.0319	3.47356	1.59826	6.48751	6.75371	15.014	13.5559	4.38478	2.54657	2.59662	1.98775
ENSG00000141401.11	IMPA2	663.441	28.1568	18.7608	0.666296	0.0501704	67.5152	21.2535	37.7299	21.7744	39.7377	30.3116	30.9022	7.20786	25.4468	24.7281	33.7266	17.1458	32.7203	18.4886	12.1633	20.6721	6.20452	32.0926	21.0101	32.8946	26.3907	15.4338	8.5566	14.5843	9.24359	11.8375	33.4047	10.2648
ENSG00000162624.14	LHX8	37.7122	1.13978	1.80119	1.58029	0.013923	0.396212	0.186394	0.573515	0.304061	0.936952	1.15631	0.794463	2.03421	1.56699	0.584264	0.425477	3.65225	0.574165	1.70602	0.705434	0.730846	1.12558	2.90254	1.25264	3.32494	0.885419	1.90356	2.78968	1.77716	0.784438	1.76856	1.32214	1.54795
ENSG00000254535.3	PABPC4L	24.4705	1.19906	0.714192	0.595625	0.0881822	0.0708259	2.14909	2.64222	1.95672	0.841331	0.253677	1.22899	1.14113	0.363857	0.414695	1.40163	0.48965	0.81376	1.58347	1.13492	1.84768	0.229951	0.512524	0.291685	0.445769	0.284896	0.788823	0.822818	0.102112	0.252404	0.889152	0.354514	1.16217
ENSG00000111452.12	ADGRD1	11.5001	0.348117	0.69833	2.00602	0.0163654	0.130853	0.109126	0.0657454	0.215674	0.123645	0.179896	0.0550448	0.918529	0.231355	0.250744	0.0602222	0.852311	0.125595	0.132978	0.270042	0.120909	0.217249	0.178541	0.864017	0.816767	0.622055	1.30411	1.69607	0.75462	0.254359	0.119472	0.690703	0.139425
ENSG00000152192.7	POU4F1	23.5407	0.537363	1.40617	2.6168	0.132361	1.46319	0	0.653627	0.265945	0.381162	0.582298	0.96213	0.74914	0.254331	0	0.212652	0.0968003	0.0239138	0.889555	0.0257085	1.03059	0.156267	0.76367	0	4.75877	0.0516283	0.470892	0.447329	0.0832704	4.39106	0.451166	2.38989	1.98572
ENSG00000156127.6	BATF	107.88	3.09854	4.9386	1.59385	0.0737532	1.78655	1.89104	2.32742	3.23907	2.91805	3.41273	2.31471	8.58103	2.95011	4.32366	1.8911	4.94047	1.44241	0.931983	2.02779	2.84484	8.12054	2.29834	2.00662	6.95102	10.0609	9.05148	6.03786	4.76508	2.12225	4.48568	3.04043	1.11677
ENSG00000104814.12	MAP4K1	102.997	2.64535	5.08592	1.92258	0.0360691	2.34742	2.87539	1.85338	2.7914	1.44684	3.20798	0.799287	10.0443	2.45415	1.76343	0.489212	3.17336	1.70545	1.18826	2.04044	2.28088	5.0869	3.84607	1.65822	2.28077	14.4903	7.04146	10.2442	9.2271	3.36726	1.8905	2.26128	1.14205
ENSG00000104413.16	ESRP1	1022.07	42.1205	30.2358	0.71784	0.0705967	43.3844	47.0876	54.8543	26.3555	24.4595	33.6735	60.1089	21.77	18.3845	36.3087	50.6604	26.7251	94.2378	32.519	59.779	27.8277	23.029	22.1002	30.657	30.6591	26.774	26.478	26.627	34.5881	32.4663	18.7561	50.2985	41.5042
ENSG00000142611.16	PRDM16	10.8152	0.306403	0.693778	2.26426	0.000808737	0.233036	0.0885466	0.290141	0.340477	0.337153	0.0998743	0.0995371	0.468647	0.177604	0.167933	0.0412498	0.337988	0.100197	0.253821	0.0598425	0.273298	0.465599	0.326698	0.805359	0.594885	1.05756	0.595032	1.23058	0.516884	0.106471	0.855159	0.807538	0.0840405
ENSG00000125735.10	TNFSF14	51.5829	1.4797	2.47596	1.67328	0.039731	0.43972	1.29288	0.839012	1.2338	4.00821	1.07913	1.32255	2.9408	1.64046	0.600744	0.55652	2.02665	0.842032	0.600776	1.27221	0.682813	2.29017	2.02311	1.42678	1.84503	5.35542	1.85652	4.83753	5.12448	1.78468	0.736035	1.06381	1.86108
ENSG00000168754.14	FAM178B	35.6596	1.96271	0.693767	0.353474	0.0472926	0.148165	0.662175	0.0194971	0.170557	2.90894	0.0393098	1.27978	0.39036	2.30165	2.19773	4.5687	0	6.96278	4.04867	2.2423	0.11713	0.060131	0.0794208	0.0369814	0.169551	2.97995	0.0431421	0.521607	0.46283	2.99211	0.206675	0.049442	0
ENSG00000100938.17	GMPR2	243.117	7.9354	9.76043	1.22999	0.0678366	7.744	4.65002	7.2725	6.76882	5.78508	7.19736	6.85511	9.0364	10.3254	10.1011	6.75167	9.97595	8.60328	6.3805	10.0839	5.68734	6.22705	16.6556	9.58031	11.6689	8.25509	9.76876	11.887	7.94014	7.25647	12.9222	8.37837	9.35829
ENSG00000069431.11	ABCC9	40.6162	1.24897	1.89859	1.52013	0.0920358	0.693333	0.914697	1.11863	0.299294	1.91726	1.31963	0.78811	1.83279	1.50993	0.96488	0.874031	1.47778	0.74887	1.23558	1.5397	1.28685	1.22951	2.63384	1.52362	1.44883	0.606286	3.56805	4.5527	2.03179	1.23542	0.920873	1.82575	0.518197
ENSG00000204152.10	TIMM23B	156.508	5.22314	6.22774	1.19234	0.0548285	4.86975	3.27467	5.54114	6.08385	4.6788	5.69998	3.44631	6.47885	3.9944	4.69626	5.27338	4.75294	6.83157	3.8426	7.38252	6.48304	5.09195	4.29936	6.39193	7.93283	9.29491	5.83029	6.53476	4.21251	5.7848	4.74696	5.85004	7.20728
ENSG00000012983.11	MAP4K5	436.323	14.126	17.4794	1.23739	0.0626483	15.8539	12.5656	14.4765	9.24395	9.81432	15.4532	13.2048	13.3549	17.9082	15.3007	12.1183	18.8595	13.3565	12.7567	16.1231	32.4146	12.6817	13.5601	14.0906	18.7995	11.6145	16.0766	22.2037	12.2069	12.4461	17.5762	20.2874	21.9748
ENSG00000181007.8	ZFP82	24.0675	0.783582	1.1626	1.4837	0.020963	0.62979	0.806534	0.451205	0.161105	0.588797	0.63123	0.172694	1.85781	0.487885	0.109259	1.73908	0.17592	1.14444	0.799623	0.498359	0.893008	1.23063	0.712681	1.10035	0.854156	0.656786	1.78286	1.77371	1.0425	0.38792	0.780881	0.79393	1.80437
ENSG00000169442.8	CD52	198.34	5.09972	9.58799	1.8801	0.0680868	2.62154	10.3067	2.58728	1.77831	3.52189	4.76931	1.38635	17.4188	9.13884	2.0466	1.80976	10.3565	3.37256	1.25593	2.62548	5.6463	14.4389	13.2493	1.68255	1.92853	19.0816	13.5764	14.0413	22.9473	8.00781	2.5075	3.74913	2.48735
ENSG00000150995.19	ITPR1	66.5526	2.07168	2.94441	1.42127	0.0449354	1.25698	2.26508	1.62922	1.83974	1.91183	2.04818	1.03596	4.66412	3.2644	1.42352	2.16502	2.13606	1.4541	1.16993	1.31109	1.7912	3.47677	2.85127	1.49867	1.33964	4.78854	3.10553	5.45829	4.65501	1.58289	2.11306	2.20885	2.10766
ENSG00000163050.16	COQ8A	91.8522	2.84426	3.9991	1.40603	0.080789	4.55837	2.12331	0.930782	1.76417	1.32259	2.52005	1.71444	4.77836	1.55735	2.33153	2.56293	2.45563	4.7137	3.21299	4.61768	3.86475	1.21204	3.7554	3.26192	6.57822	6.11198	5.06069	4.07906	1.78057	4.29459	2.68746	6.15935	1.8423
ENSG00000282034.1	AC106886.5	12.8515	0.626708	0.480836	0.767241	0.0933533	0.43426	0.739681	0.792141	0.904973	0.770813	0.45291	0.554327	0.254922	0.307716	0.67804	0.434175	0.75291	0.186	0.267829	0.369925	0.400796	0.425405	0.27291	0.302743	0.102815	0.281095	0.425121	0.506082	0.280659	0.51586	0.32585	0.479704	0.631835
ENSG00000166707.10	ZCCHC18	7.39649	0.267792	0.475354	1.77509	0.0232553	0.0516618	0.218733	0.142762	0.133806	0.10228	0.0411193	0.167337	0.659608	0.113745	0.120995	0.0237761	0.194815	0.288765	0.154001	0.103479	0.0875153	0.230629	0.415383	0.0773674	0.177356	0.623425	0.473844	1.47317	0.409652	0.122739	0.17295	0.413743	0.201835
ENSG00000117148.7	ACTL8	57.8853	3.45519	0.681343	0.197194	0.0256918	0.187856	0	1.96524	0.243278	1.16225	0.224281	0.347703	0	35.6046	0.219984	9.2076	0.354199	0.350008	0.209996	0.25085	0.0318229	0	0.151044	0	0	0	0	0.0992004	0	0.223155	0	7.05224	0
ENSG00000123999.4	INHA	16.261	0.885592	0.444393	0.501804	0.147582	1.29838	0.211434	0.039428	2.32814	0	1.11292	0.138645	2.18604	0.879591	0.467827	0.321758	1.63205	0.372171	0.595448	0.200051	0.372217	0.202666	0	0.523499	0.457166	0.535662	0.697953	0	0	0.474571	0.167179	0.499919	0.546279
ENSG00000105880.6	DLX5	235.294	10.8049	5.84776	0.541215	0.0503892	14.2229	8.9763	4.98213	10.8957	2.03258	9.40714	29.2451	2.49678	8.63729	15.2479	15.6268	10.3239	1.99059	22.5425	3.94559	17.0013	0.447141	4.9931	12.3749	8.48176	2.14878	1.88111	5.71231	1.29965	8.56671	2.01188	4.01079	5.79147
ENSG00000040608.13	RTN4R	40.1893	1.72192	1.32004	0.766608	0.0539685	2.56933	1.99808	1.2627	1.44864	1.34956	2.79625	1.26169	1.46649	1.2122	2.04677	0.651568	1.51594	1.43288	2.26646	1.05028	1.63439	1.25553	1.51777	0.942311	1.68011	0.773374	0.709959	0.719923	1.02057	0.934325	0.833816	1.99471	1.84372
ENSG00000197776.7	KLHDC1	46.2637	1.45329	2.09726	1.44312	0.0277354	0.640685	1.64402	0.850744	1.10627	0.951326	1.20532	1.42841	2.72672	1.56022	0.772994	0.616526	3.29454	1.26605	1.30217	0.933304	1.61812	1.30007	2.21666	0.959474	1.26637	2.49905	3.30706	4.24443	1.63746	1.59134	1.21866	2.74044	1.36531
ENSG00000143384.12	MCL1	2748.12	89.3237	108.543	1.21517	0.0541052	100.178	58.6506	99.272	70.0279	125.317	101.128	124.071	88.3537	85.3831	115.513	78.6785	105.834	42.6635	56.2089	87.0772	92.5527	166.038	93.355	93.218	73.9349	84.911	100.507	96.9601	114.689	118.527	143.884	93.9113	137.273
ENSG00000151650.7	VENTX	10.7698	0.329146	0.664048	2.01749	0.00136637	0.0601449	0.25465	0.284922	0.363482	0.446533	0.0957425	0.0834918	0.219405	0.154492	0.187817	0.249123	0.226804	0.149414	0.179289	0.481881	0.28528	0.414954	0.128958	0.540429	0.481783	0.564507	0.394037	1.58802	1.25733	0.500125	0.654387	0.240841	0.281973
ENSG00000072135.12	PTPN18	348.359	11.0134	14.3045	1.29882	0.0871496	10.5522	14.058	4.14177	8.84844	10.1155	7.50586	8.82549	17.7168	12.0059	10.2264	15.6577	10.4816	10.3388	10.553	12.6736	6.21533	13.955	11.9952	10.7849	21.9646	20.4505	18.9915	23.2178	15.3227	12.1748	9.41522	10.2905	9.88002
ENSG00000113838.12	TBCCD1	204.614	6.6297	8.30526	1.25274	0.0641099	6.78731	5.04351	4.9123	3.41822	5.29359	6.95743	5.92444	8.81597	6.07561	4.7769	5.67946	10.2767	8.52643	8.66018	6.7975	7.89163	5.27955	12.9817	12.0126	8.6496	5.37763	7.88275	9.1776	5.22632	9.77295	6.06786	6.02255	10.3256
ENSG00000123130.16	ACOT9	231.858	7.20757	9.73419	1.35055	0.0306473	5.86382	4.48063	6.24603	12.851	8.7241	5.21953	12.4268	5.71689	8.61971	7.04275	4.47119	8.81	4.07275	7.11085	4.95755	6.34793	14.5461	6.80711	5.55989	7.62342	9.25804	9.77463	9.71087	7.92878	8.16095	20.5017	8.61423	10.4108
ENSG00000163131.10	CTSS	386.464	10.4045	17.9382	1.72408	0.0839938	5.21767	10.4905	10.9201	7.93679	10.1455	12.3928	11.0562	16.9944	13.1593	8.17903	11.7779	13.5856	5.88943	4.62905	12.1928	11.1817	59.2907	22.8185	5.33326	4.12269	9.27245	22.4633	26.2407	21.1942	12.0519	16.393	10.9856	10.5483
ENSG00000035720.7	STAP1	49.6945	1.40177	2.42062	1.72683	0.0964795	1.37526	1.04512	2.04637	0.913332	0.575969	1.93663	0.440564	4.50234	1.59161	1.32141	0.194749	1.72869	0.91982	0.157677	0.776954	2.86733	2.0608	3.79932	0.316856	0.605296	4.6809	4.01984	4.69257	3.12666	1.63369	0.796852	0.741331	0.82661
ENSG00000110455.13	ACCS	118.614	3.6598	5.11671	1.39809	0.0632212	5.67979	4.34729	1.36431	5.42254	1.65104	2.8703	1.71041	4.73225	2.40402	2.97954	2.00544	4.19299	4.94593	4.83748	4.25369	4.74461	2.56119	4.99367	4.23045	8.76931	4.95619	6.60215	10.0612	3.4228	3.46277	3.06848	6.13722	2.20727
ENSG00000168517.10	HEXIM2	41.1018	1.34987	1.81951	1.34791	0.0302977	0.60136	0.909332	0.813942	1.70589	0.935455	0.820529	0.874547	2.82051	1.1664	0.80481	1.30474	2.05173	1.76069	1.08838	1.08981	1.01871	1.22027	1.19729	1.86549	3.14588	2.53415	1.05061	1.99608	1.3005	1.83692	2.3727	1.20403	1.61104
ENSG00000170421.12	KRT8	831.023	36.4969	22.0284	0.603569	0.136053	35.3675	43.8998	1.53683	22.758	4.24407	74.6282	18.4141	16.9859	36.2549	50.0173	40.6575	50.1175	62.8143	37.412	50.8459	12.5256	1.71415	39.8118	34.0846	59.3693	4.87863	16.3696	25.3945	2.40278	34.6383	9.58284	34.1577	10.1395
ENSG00000092009.10	CMA1	8.74969	0.196437	0.66178	3.36892	0.0142469	0	0	0.0737644	0	0.0924836	0.297445	0	0.227211	0.274266	0.145874	0.085995	0	0	0	0.249512	0.443143	0.379161	0.400635	0	0	0	1.79544	0.789368	1.88574	1.10982	0.312769	0.187056	0
ENSG00000143303.11	RRNAD1	153.924	4.78053	6.53966	1.36798	0.0610956	9.17121	2.84601	1.89751	6.43929	4.10179	6.33224	4.42271	4.43394	3.89251	3.62304	3.7123	4.44457	4.83804	3.37619	6.67663	5.44698	3.76687	3.37607	7.94289	11.1904	12.2229	5.18805	5.3098	4.6597	6.49735	3.00555	7.07945	8.02952
ENSG00000156738.17	MS4A1	128.446	2.77904	6.88928	2.47902	0.169273	4.27642	0.710045	3.31967	1.27205	1.95654	5.0055	0.715033	12.4102	1.60881	0.925812	0.115772	2.07789	2.14258	0.48206	3.16714	5.01621	2.74185	11.3844	0.645808	0.49348	15.5154	7.91063	13.7771	23.9882	3.32974	0.180458	1.11523	2.16213
ENSG00000170909.13	OSCAR	35.4839	1.07244	1.70748	1.59214	0.118047	1.17617	0.59284	1.0613	1.66823	1.12272	0.401209	1.12737	0.868339	1.41811	0.787045	0.541306	2.32325	0.417412	0.688701	0.392646	0.426952	3.88687	1.03576	1.25815	1.44208	2.81615	0.733872	0.887282	2.66471	1.29738	2.88283	0.252311	1.3129
ENSG00000184178.15	SCFD2	213.335	6.99966	8.54922	1.22138	0.0638233	5.99181	2.56018	7.44339	7.2612	9.74042	5.81914	4.65486	8.02121	5.04292	5.79349	6.07176	8.08441	8.94468	7.12813	10.9372	8.45535	5.37651	9.54695	8.8497	12.2036	11.2033	8.8354	8.59234	8.48005	8.42371	5.2908	6.1634	8.41871
ENSG00000185477.4	GPRIN3	72.1742	2.03826	3.4154	1.67564	0.0607784	1.08239	1.91761	1.54554	1.72977	2.03463	2.15377	0.825867	5.73371	2.12536	1.40234	0.832005	3.06847	1.53038	0.901029	2.19109	1.70483	4.65443	3.37004	1.03465	0.553425	3.04154	4.60677	9.92346	4.3163	2.57155	2.29363	2.87028	2.15935
ENSG00000166741.7	NNMT	184.001	4.80534	8.82466	1.83643	0.0577393	1.61946	1.43906	5.73017	3.78021	8.57962	3.43728	2.44238	7.07466	10.5867	1.45159	2.20835	12.1385	1.78805	5.14043	3.16369	2.82466	23.125	6.78387	5.43439	3.91234	2.41268	3.6414	18.9407	10.0311	2.49377	13.2025	4.68352	15.9347
ENSG00000186810.7	CXCR3	30.8336	0.834382	1.62445	1.94689	0.0534325	0.468634	0.793669	0.888016	0.72827	0.603074	0.746002	0.216849	2.96323	1.30695	0.585368	0.0862712	0.942508	0.11642	0.0698488	0.500627	0.381057	2.77677	1.55745	0.140363	0.429021	1.25671	1.55559	4.55345	3.64847	0.668032	0.784434	1.40743	0.65912
ENSG00000147251.15	DOCK11	225.935	6.83501	9.70846	1.4204	0.0778802	5.70494	5.99265	9.64618	6.31974	7.22035	11.1964	4.86981	13.4941	6.98771	4.65712	2.94927	6.4834	3.0901	5.29986	7.11361	7.93435	19.5372	12.1203	6.84656	3.10024	8.69718	10.001	17.4978	11.3422	4.17756	9.41853	8.11033	6.12677
[truncated: 14,321 more rows]
